# Supplementary material for: μ-Chlorido, μ-hydroxo-bridged dicarbonyl ruthenacycles: synthesis, structure and catalytic properties in hydrogen atom transfer
Source: Royal Society of Chemistry journal article supplement (doi:10.1039/b820426h), 2009-01-01
Supplement: b820426h.pdf [file b820426h.pdf]

# **$\mu$ -Chlorido, $\mu$ -Hydroxo-bridged Dicarbonyl Ruthenacycles: Synthesis, Structure and Catalytic Properties in Hydrogen Atom Transfer.**

**Jean-Pierre Djukic,<sup>\*,a</sup> Ksenia Parkhomenko,<sup>a</sup> Akram Hijazi,<sup>a</sup> Atika Chemmi,<sup>a</sup>  
Lionel Allouche,<sup>a</sup> Lydia BreLOT,<sup>a</sup> Michel Pfeffer,<sup>a</sup> Louis Ricard<sup>b</sup> and Xavier-  
Frédéric Le Goff.<sup>b</sup>**

Electronic Supporting Information.

<sup>a</sup> Institut de Chimie, CNRS, Université de Strasbourg, 4, rue Blaise Pascal, 67000  
Strasbourg, France. Fax: 33 (0)3 90245001; Tel: 33 (0)390241523; E-mail:  
[djukic@chimie.u-strasbg.fr](mailto:djukic@chimie.u-strasbg.fr)

<sup>b</sup> Laboratoire "Hétéroéléments et Coordination", CNRS, École Polytechnique, Route  
de Saclay, 91128 Palaiseau cedex, France. E-mail: [louis.ricard@polytechnique.edu](mailto:louis.ricard@polytechnique.edu)

## Table of content

|     |                                                                                                                    |     |
|-----|--------------------------------------------------------------------------------------------------------------------|-----|
| A.  | EXPERIMENTAL DETAILS .....                                                                                         | 4   |
| 1.  | <i>Reaction of hydroxo,chloro-bridged dimers with chloroform</i> .....                                             | 4   |
| 2.  | <i>Reaction of hydroxo,chloro-bridged dimers with isopropanol</i> .....                                            | 4   |
| 3.  | <i>Reaction of hydroxo,chloro-bridged dimers with indanol</i> .....                                                | 5   |
| 4.  | <i>Evidence for the spontaneous decomposition of hydrido species 6a and the formation of ligand 1a</i> .....       | 9   |
| 5.  | <i>Isomerisation of 6a in C<sub>6</sub>D<sub>6</sub></i> .....                                                     | 10  |
| 6.  | <i>Catalytic reduction of diphenylacetylene with indanol</i> .....                                                 | 10  |
| 7.  | <i>Catalytic reduction of diphenylacetylene with i-PrOH</i> .....                                                  | 11  |
| 8.  | <i>Catalytic reduction of 1-(3-fluoromethylphenyl)-2-phenylacetylene with indanol</i> .....                        | 11  |
| 9.  | <i>Catalytic reduction of 1-(3-fluoromethylphenyl)-2-phenylacetylene with i-PrOH</i> .....                         | 11  |
| 10. | <i>Catalytic reduction of 1-(4-nitrophenyl)-2-phenylacetylene with indanol</i> .....                               | 12  |
| 11. | <i>Catalytic reduction of 1-(4-nitrophenyl)-2-phenylacetylene with i-PrOH</i> .....                                | 12  |
| 12. | <i>Catalytic reduction of 1,4-diphenylbutadiyne with indanol</i> .....                                             | 12  |
| 13. | <i>Catalytic reduction of 1,4-diphenylbutadiyne with i-PrOH</i> .....                                              | 13  |
| 14. | <i>Kinetic study of the catalytic reduction of diphenylacetylene with indanol</i> .....                            | 14  |
| 15. | <i>Hydrogenation of 7 in the presence of 10 %mol of 2a</i> .....                                                   | 25  |
| B.  | EVALUATION OF CATALYSIS INHIBITION BY THE PRODUCTS .....                                                           | 26  |
| C.  | INFRARED SPECTRA (ATR) .....                                                                                       | 29  |
| D.  | HIGH RESOLUTION MS (ESI+) OF 1A .....                                                                              | 31  |
| E.  | <sup>1</sup> H NMR DIFFUSION ORDERED SPECTROSCOPY OF 6A AND 2A (REFERENCE). .....                                  | 32  |
| F.  | CIF OF THE ABORTED STRUCTURE OF 2B SHOWING THE PARALLEL RELATIONSHIP BETWEEN CHELATING LIGANDS. ....               | 33  |
| G.  | CRYSTALLOGRAPHIC DATA FOR 1B, 2A, 2B AND 3B .....                                                                  | 43  |
| 1.  | <i>1b</i> .....                                                                                                    | 43  |
| 2.  | <i>2a</i> .....                                                                                                    | 49  |
| 3.  | <i>2b</i> .....                                                                                                    | 63  |
| 4.  | <i>3b</i> .....                                                                                                    | 75  |
| H.  | COMPUTATIONAL SUPPLEMENTARY MATERIAL .....                                                                         | 89  |
| 1.  | <i>Geometry Optimizations with the BP/TZP method (all electrons on C, H, N, O; frozen core to 3d for Ru)</i> ..... | 90  |
| a)  | <i>3b</i> .....                                                                                                    | 91  |
| b)  | <i>3b with the dispersion-corrected BP-D functional -TZP basis set with frozen core at Ru.</i> .....               | 103 |
| c)  | <i>ax-ax-3c</i> .....                                                                                              | 109 |
| (1) | <i>Two points numerical differentiation frequencies</i> .....                                                      | 112 |
| (2) | <i>Computed IR spectrum</i> .....                                                                                  | 115 |
| d)  | <i>ax-eq-3c</i> .....                                                                                              | 116 |
| e)  | <i>eq-eq-3c</i> .....                                                                                              | 119 |
| 2.  | <i>Optimized Fragments</i> .....                                                                                   | 123 |
| a)  | <i>ax-4</i> .....                                                                                                  | 124 |
| b)  | <i>eq-4</i> .....                                                                                                  | 127 |
| c)  | <i>Optimized fragment 5</i> .....                                                                                  | 129 |
| d)  | <i>Strict geometry optimization for fragment 5</i> .....                                                           | 132 |
| 3.  | <i>Geometry optimizations taking into account solvation (COSMO procedure) by tetrahydrofuran</i> .....             | 135 |
| a)  | <i>ax-ax-3c</i> .....                                                                                              | 136 |
| b)  | <i>ax-eq-3c</i> .....                                                                                              | 140 |
| c)  | <i>eq-eq-3c</i> .....                                                                                              | 144 |
| 4.  | <i>Single Point calculations on fragments from gas-phase optimized geometries</i> .....                            | 148 |
| a)  | <i>From ax-ax-3c</i> .....                                                                                         | 149 |
| (1) | <i>ax-4</i> .....                                                                                                  | 149 |
| (2) | <i>5</i> .....                                                                                                     | 151 |
| b)  | <i>From ax-eq-3c</i> .....                                                                                         | 153 |
| (1) | <i>ax-4</i> .....                                                                                                  | 153 |
| (2) | <i>5</i> .....                                                                                                     | 154 |
| (3) | <i>eq-4</i> .....                                                                                                  | 156 |
| (4) | <i>5</i> .....                                                                                                     | 157 |
| c)  | <i>From eq-eq-3c</i> .....                                                                                         | 160 |
| (1) | <i>eq-4</i> .....                                                                                                  | 160 |

|                                                                                                                                     |     |
|-------------------------------------------------------------------------------------------------------------------------------------|-----|
| (2) 5 .....                                                                                                                         | 162 |
| 5. <i>Geometry Optimizations using the BP/TZP(ZORA) method (all electron, no frozen core, scalar relativistic correction)</i> ..... | 164 |
| a) ax-ax-3c.....                                                                                                                    | 165 |
| (1) Bond Order Analysis.....                                                                                                        | 167 |
| (2) NPA- NBO (gennbo extension for ADF).....                                                                                        | 169 |
| (3) Analytical Frequencies .....                                                                                                    | 200 |
| b) ax-eq-3c.....                                                                                                                    | 205 |
| (1) Analytical frequency.....                                                                                                       | 207 |
| c) eq-eq-3c.....                                                                                                                    | 212 |
| (1) Analytical Frequencies .....                                                                                                    | 313 |
| (2) Computed IR spectrum.....                                                                                                       | 317 |
| d) ax-ax-3c geometry optimization using dispersion corrected Becke-Perdew functional BP-D and the TZP(ZORA) basis set. ....         | 318 |
| e) eq-eq-3c geometry optimization using dispersion corrected Becke-Perdew functional BP-D and the TZP(ZORA) basis set. ....         | 323 |

## A. Experimental Details

### 1. Reaction of hydroxo,chloro-bridged dimers with chloroform

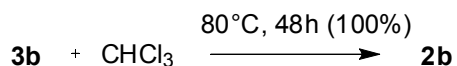

Under argon atmosphere, a 100-mL *Schlenk* tube containing a magnetic stirring bar was loaded with 90 mg of **3b** (0.104 mmol) and 15 mL oxygen-free freshly distilled chloroform was added. The solution was brought to 80 °C on the oil bath and after 48 h refluxing it gave **2b** in 100 % yield (determined by <sup>1</sup>H NMR – no residual signal of Ru-OH at –3 ppm).

### 2. Reaction of hydroxo,chloro-bridged dimers with isopropanol

**3a** (110 mg, 0.135 mmol) reacted with a mixture of toluene (5 mL) and *i*-PrOH (15 mL) in the presence of Na<sub>2</sub>CO<sub>3</sub> (110 mg, 1.1 mmol) at 90 °C during 1 h. The suspension was filtered through a mixture of celite and MgSO<sub>4</sub>, washed with toluene and pentane, evaporated under vacuum to yield brownish-red powder, yield 25 % (determined by <sup>1</sup>H NMR).

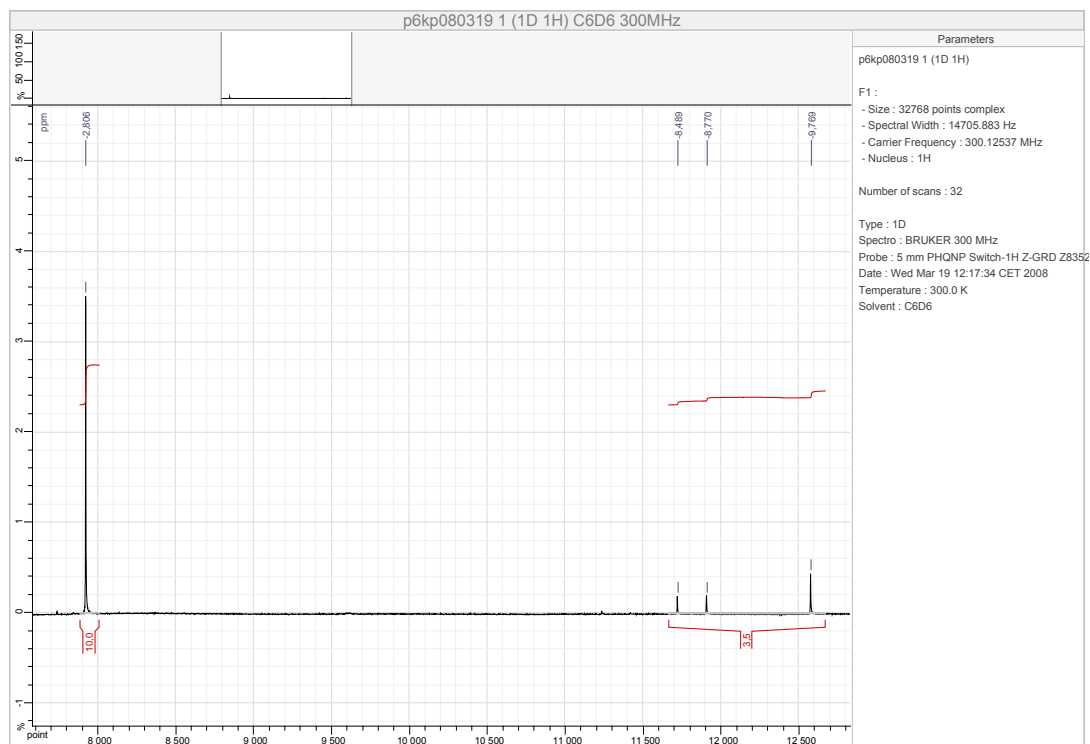

### 3. Reaction of hydroxo,chloro-bridged dimers with indanol

**3a** (30 mg, 0.04 mmol) was mixed with indanol (214 mg, 1.6 mmol, 40 eq) in  $d_6$ -benzene in NMR-tube, the tube was kept 1 h at 90 °C and analysed subsequently; the yield in ruthenium hydride species is 42 %.

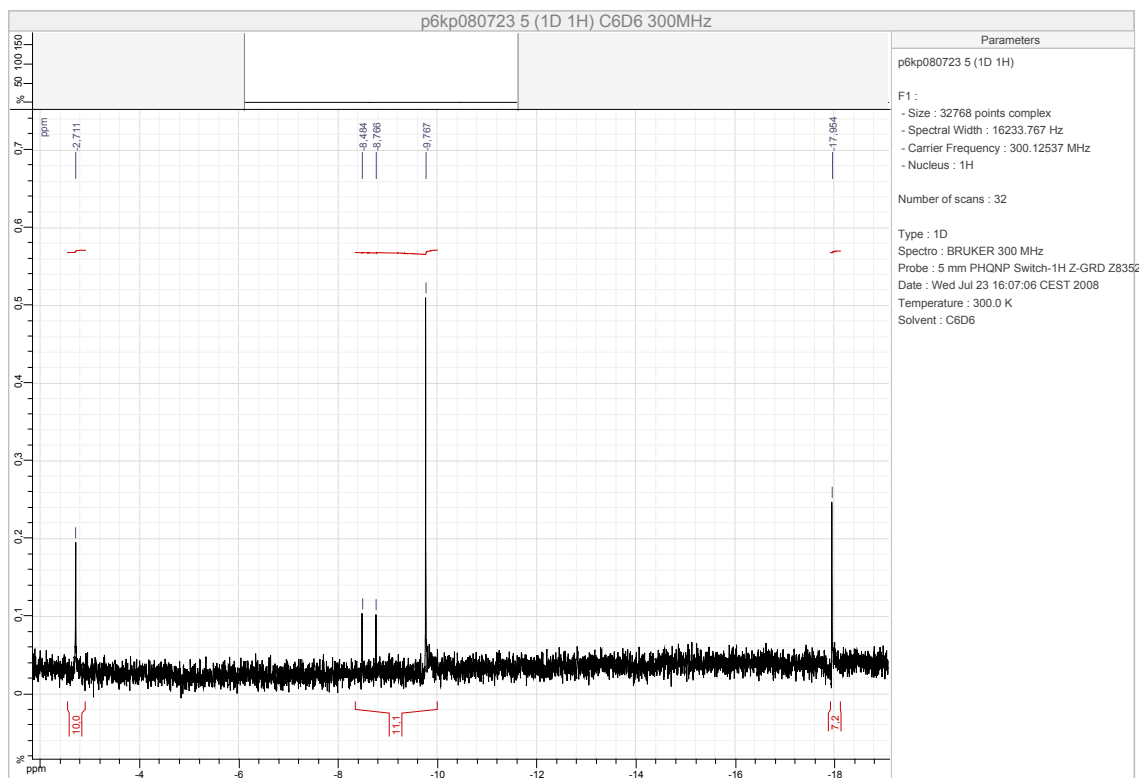

**3b** (30 mg, 0.035 mmol) reacted with indanol (5 mg, 0.035 mmol) in  $d_6$ -benzene (4 mL) at 90 °C during 6 h. The solution was taken for NMR-analysis without any preparations, the yield of ruthenium hydride systems 10% (determined by  $^1\text{H}$  NMR).

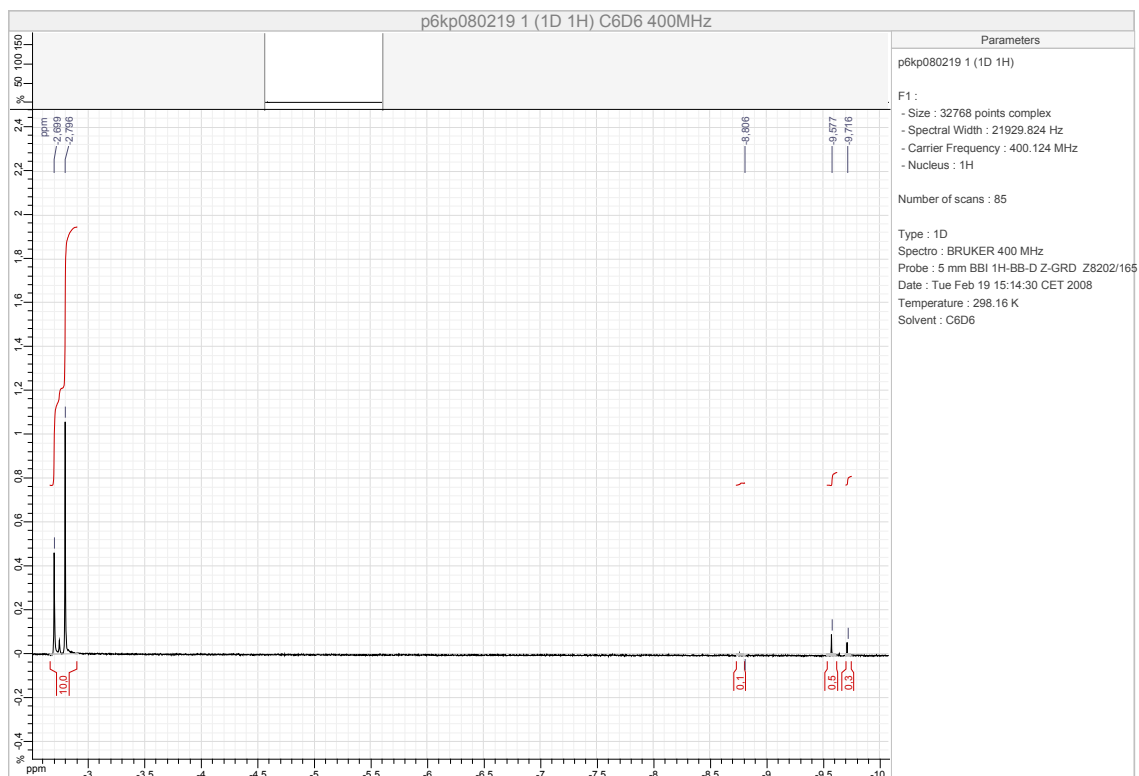

## 6a

Major compound:

$^1\text{H}$  NMR (500 MHz,  $\text{C}_6\text{D}_6$ , 298K):  $\delta$  8.81 (d, 2 H,  $J_{\text{H-H}} = 5.9$ ), 8.07 (d, 2 H,  $J_{\text{H-H}} = 5.9$ ), 7.72 (m, 2 H), 7.52 (d, 2 H,  $J_{\text{H-H}} = 2.0$ ), 6.64 (dd, 2H,  $J_{\text{H-H}} = 5.9$ ,  $J_{\text{H-H}} = 2.0$ ), 5.98 (dd, 2 H,  $J_{\text{H-H}} = 5.9$ ,  $J_{\text{H-H}} = 2.0$ ), 2.22 (s, 6 H), 1.00 (m, 18 H), -8.77 (s, 1H).

Minor compound:

$^1\text{H}$  NMR (500 MHz,  $\text{C}_6\text{D}_6$ , 298K):  $\delta$  8.71 (d, 2 H,  $J_{\text{H-H}} = 5.9$ ), 7.65 (d, 2 H,  $J_{\text{H-H}} = 2.0$ ), 7.43 (d, 2 H,  $J_{\text{H-H}} = 2.0$ ), 6.99 (d, 2 H,  $J_{\text{H-H}} = 5.9$ ), 6.53 (dd, 2H,  $J_{\text{H-H}} = 5.9$ ,  $J_{\text{H-H}} = 2.0$ ), 5.49 (dd, 2 H,  $J_{\text{H-H}} = 5.9$ ,  $J_{\text{H-H}} = 2.0$ ), 2.38 (s, 6 H), 0.90 (m, 18 H), -8.49 (s, 1H).





#### 4. Evidence for the spontaneous decomposition of hydrido species **6a** and the formation of ligand **1a**.

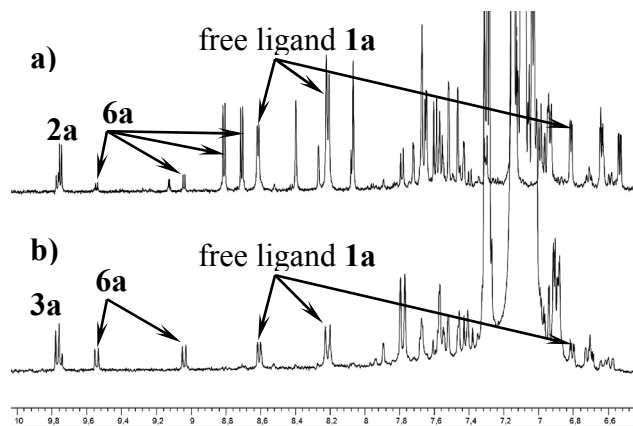

a) **2a** – 20 %, **6a** – 64 %, **1a** – 16 % (Scheme 3)

b) **3a** – 20 %, **6a** – 64 %, **1a** – 16 % (Scheme 3)

## 5. Isomerisation of **6a** in $C_6D_6$

All the manipulations were carried out in argon atmosphere. Compound **6a** (7 mg, 0.01 mmol) produced by reaction of **2a** with  $Li[Et_3BH]$  was dissolved in moist deuterated benzene ( $\sim 0.5$  mL) and placed in a NMR-tube; the tube was sealed and heated for 1 h at  $90^\circ C$  in a silicone oil bath.  $^1H$  NMR spectra of the content of the tube before and after heating is displayed in the pictures below.

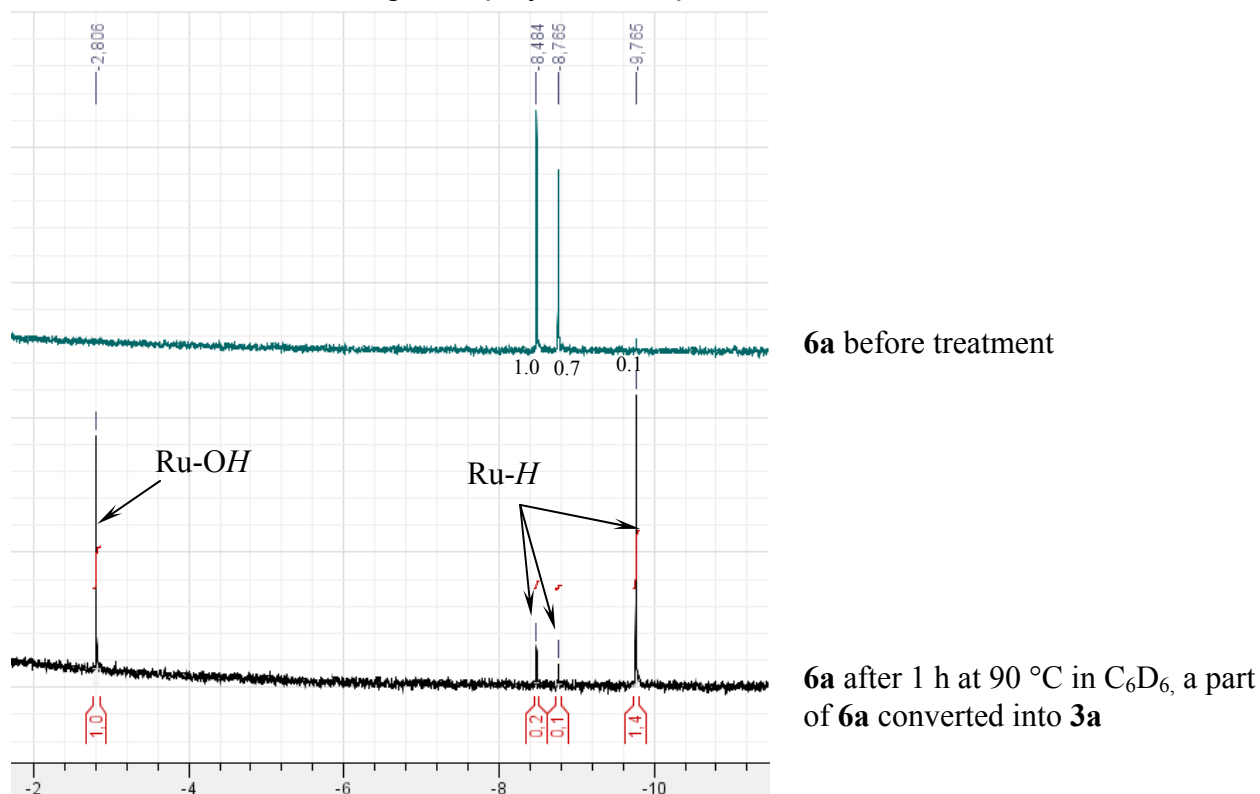

## 6. Catalytic reduction of diphenylacetylene with indanol

The reaction was typically carried out using 2.5 molar % of the catalysts **2a**, **2b** or **3b-b'** versus substrate in a 100 mL Schlenk tube. Flushing the Schlenk with argon, loading calculated amount of catalyst, diphenylacetylene (200 mg, 1.122 mmol), indanol (150.5 mg, 1.122 mmol), 1,3,5-tri-*tert*-butylbenzene as internal standard (30.7 mg, 0.125 mmol) and excess of a base, add 10 mL of toluene under argon atmosphere and bring the solution slowly to  $90^\circ C$ . Take 1 mL samples in a different Schlenk tube before heating and at 4, 16 or 24 h, evaporating the solvent and adding deuterated chloroform for NMR analysis. Only *cis*-stilbene and *trans*-stilbene were found as the products.

### 7. Catalytic reduction of diphenylacetylene with i-PrOH

Flushing the Schlenk with argon, loading calculated amount of the catalyst **2a** (2.5 %mol, 21 mg), diphenylacetylene (178 mg, 1 mmol), Na<sub>2</sub>CO<sub>3</sub> (60 mg, 0.57 mmol), 1,3,5-tri-tert-butylbenzene as internal standard (30.7 mg, 0.125 mmol), add 10 mL of i-PrOH under argon atmosphere and 0.5 mL of distilled water, bringing the solution slowly to 90°C. Take 1 mL samples in another Schlenk tube before heating and at 4, 24 and 48 h, evaporate the solvent and add deuterated chloroform for NMR analysis.

### 8. Catalytic reduction of 1-(3-fluoromethylphenyl)-2-phenylacetylene with indanol

The initial compound was synthesized according to known procedures.<sup>1</sup> Reaction was typically carried out using 2.5 molar % versus substrate of the catalysts **2a** or **3b-b'** in a 100 mL Schlenk tube. Flush the Schlenk with argon, load calculated amount of the catalyst, 1-(3-fluoromethylphenyl)-2-phenylacetylene (200 mg, 0.813 mmol), indanol (109.1 mg, 0.813 mmol), 1,3,5-tri-tert-butylbenzene as internal standard (30.7 mg, 0.125 mmol), add 10 mL of toluene under argon atmosphere and bring the solution slowly to 90°C. Withdraw 1 mL samples in another Schlenk tube before heating and at 4 or 24 h, evaporate the solvent and add deuterated chloroform for NMR analysis. Only cis<sup>2</sup> and trans<sup>3</sup> monosubstituted stilbenes were found as the products.

### 9. Catalytic reduction of 1-(3-fluoromethylphenyl)-2-phenylacetylene with i-PrOH

Flush the Schlenk with argon, load calculated amount of the catalyst **2a** (2.5 %mol, 21 mg), 1-(3-fluoromethylphenyl)-2-phenylacetylene (246 mg, 1 mmol), Na<sub>2</sub>CO<sub>3</sub> (60 mg, 0.57 mmol), 1,3,5-tri-tert-butylbenzene as internal standard (30.7 mg, 0.125 mmol), add 10 mL of i-PrOH under argon atmosphere and 0.5 mL of distilled water, bring the solution slowly to 90°C. Withdraw 1 mL samples in another Schlenk tube before heating and at 4, 24 and 48 h, evaporate the solvent and add deuterated chloroform for NMR analysis.

<sup>1</sup> A. Koellhofer and H. Plenio. *Adv. Synth. & Cat.* **2005**, 347, 1295-1300.

<sup>2</sup> M.-F. Ruasse, G. Lo Moro, B. Galland, R. Bianchini, C. Chiappe, and G. Bellucci. *J. Am. Chem. Soc.*, **1997**, 119, 12492-12502.

<sup>3</sup> Xin Cui, Juan Li, Zhi-Ping Zhang, Yao Fu, Lei Liu and Qing-Xiang Guo. *J. Org. Chem.*, **2007**, 72, 9342 - 9345,

### 10. Catalytic reduction of 1-(4-nitrophenyl)-2-phenylacetylene with indanol

The initial compound was synthesized according to known procedures.<sup>4</sup> Reaction was typically carried out using 2.5 molar % versus substrate of the catalysts **2a** or **3b-b'** in a 100 mL Schlenk tube. Flush the Schlenk with argon, load calculated amount of the catalyst, 1-(4-nitrophenyl)-2-phenylacetylene (200 mg, 0.881 mmol), indanol (118.2 mg, 0.881 mmol), 1,3,5-tri-tert-butylbenzene as internal standard (30.7 mg, 0.125 mmol), add 10 mL of toluene under argon atmosphere and bring the solution slowly to 90°C. Withdraw 1 mL samples in another Schlenk tube before heating and at 4 or 24 h, evaporate the solvent and add deuterated chloroform for NMR analysis. Only cis<sup>5</sup> and trans<sup>6</sup> monosubstituted stilbenes were found as the products.

### 11. Catalytic reduction of 1-(4-nitrophenyl)-2-phenylacetylene with i-PrOH

Flush the Schlenk with argon, load calculated amount of the catalyst **2a** (2.5 %mol, 21 mg), 1-(4-nitrophenyl)-2-phenylacetylene (223 mg, 1 mmol), Na<sub>2</sub>CO<sub>3</sub> (60 mg, 0.57 mmol), 1,3,5-tri-tert-butylbenzene as internal standard (30.7 mg, 0.125 mmol), add 10 mL of i-PrOH under argon atmosphere and 0.5 mL of distilled water, bring the solution slowly to 90°C. Withdraw 1 mL samples in another Schlenk tube before heating, evaporate the solvent and add deuterated chloroform for NMR analysis.

### 12. Catalytic reduction of 1,4-diphenylbutadiyne with indanol

A Schlenk tube was charged with 1,4-diphenylbutadiyne (227 mg, 1.122 mmol), catalyst **3b-b'** (2.5 %mol, 24 mg), indanol (150.5 mg, 1.122 mmol), 1,3,5-tri-tert-butylbenzene as internal standard (30.7 mg, 0.125 mmol), and 10 mL of toluene under argon atmosphere. The reaction mixture was stirred at 90°C. The course of the reactions was followed by NMR, samples were withdrawn at 0, 2, 4, 6, 24, 30 and 72 h.

<sup>4</sup> N.Sakai, K. Annaka, T. Konakahara. *Org. Lett.* **2004**, *6*, 1527-1530.

<sup>5</sup> H. Zhao, Y. Wang, J. Sha, S. Sheng and M. Cai, *Tetrahedron* **2008**, *64*, 7517-7523.

<sup>6</sup> B. Ludolph, M. Klein, L. Erdinger and G. Boche. *Mutation Research*, **2001**, *491*, 195-209.

### 13. Catalytic reduction of 1,4-diphenylbutadiyne with i-PrOH

A Schlenk tube was charged with 1,4-diphenylbutadiyne (227 mg, 1.122 mmol), catalyst **3b-b'** ( 2.5 %mol, 24 mg), 1,3,5-tri-tert-butylbenzene as internal standard (30.7 mg, 0.125 mmol), and 10 mL of i-PrOH under argon atmosphere. The reaction mixture was stirred at 90°C. The course of the reactions was followed by NMR, samples were withdrawn at 0, 4, 24 and 72 h.

#### 14. Kinetic study of the catalytic reduction of diphenylacetylene with indanol

In a typical reaction a 100 mL Schlenk-tube flashed with argon was charged with the catalyst **3b-b'** (2.5 %mol, 48.4 mg), diphenylacetylene (400 mg, 2.244 mmol), indanol (1 eq: 301 mg, 2.244 mmol), 1,3,5-tri-tert-butylbenzene as internal standard (61.4 mg, 0.25 mmol), add 20 mL of toluene under argon atmosphere, the solution was brought slowly to 90°C. Withdraw 1 mL samples in another smaller Schlenk tube before heating and every hour during 6-7 h, 24 and 100 h, evaporate the solvent and add deuterated chloroform for NMR analysis.

Kinetic study was carried out varying the ratio of the substrates, the amount of the catalyst and at lower temperature. All the information is listed in the table below.

| n° of the experiment | Diphenyl-acetylene, mM | Indanol, mM                       | Ratio, diphenyl-acetylene:indanol | <b>3b-b'</b> , mM | T, °C |
|----------------------|------------------------|-----------------------------------|-----------------------------------|-------------------|-------|
| 1                    | 0.11                   | 0.11                              | 1:1                               | 2.8               | 90    |
| 2                    | 0.11                   | 0.22                              | 1:2                               | 2.8               | 90    |
| 3                    | 0.06                   | 0.60                              | 1:10                              | 2.8               | 90    |
| 4                    | 0.22                   | 0.11                              | 2:1                               | 2.8               | 90    |
| 5                    | 0.11                   | 0.11                              | 1:1                               | 1.12              | 90    |
| 6                    | 0.11                   | 0.11                              | 1:1                               | 0.56              | 90    |
| 7                    | 0.11                   | 0.11                              | 1:1                               | 2.8               | 70    |
| 8                    | 0.11                   | 0.11<br>(indanol-d <sub>1</sub> ) | 1:1                               | 2.8               | 90    |

<sup>a</sup> Selectivity determined after 24 h reaction

## Graphics for experiment 1.

Conversion of indanol and yield of products

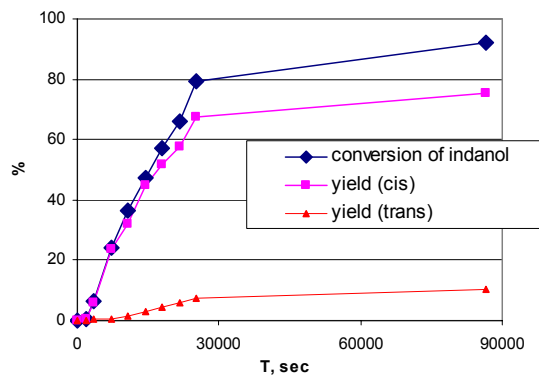

Ln of concentration of indanol

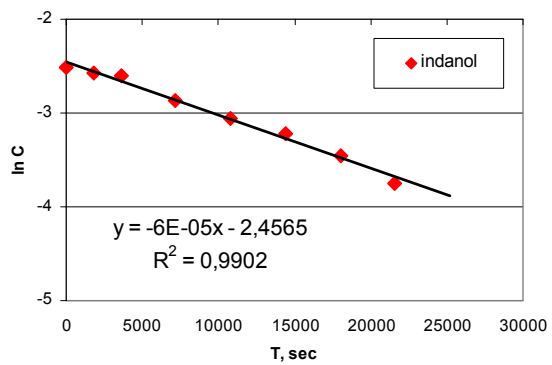

## Graphics for experiment 2.

Conversion of indanol and yield of products

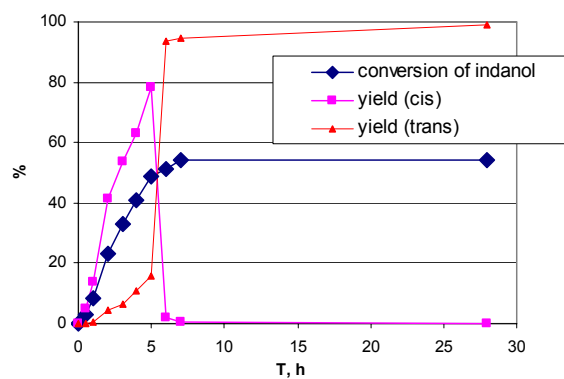

Ln of concentration of indanol

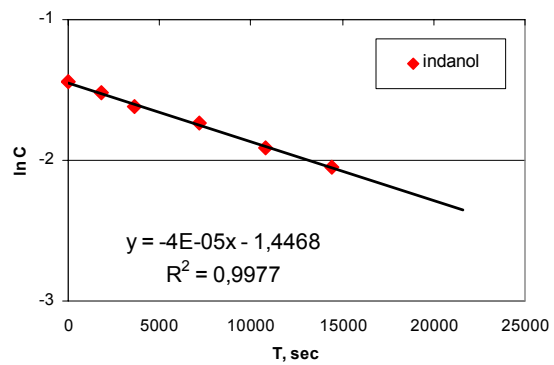



### Graphics for experiment 3.

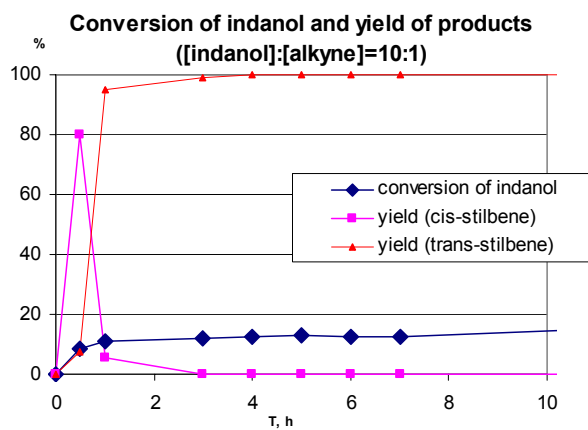

## Graphics for experiment 4.

Conversion of indanol and yield of products

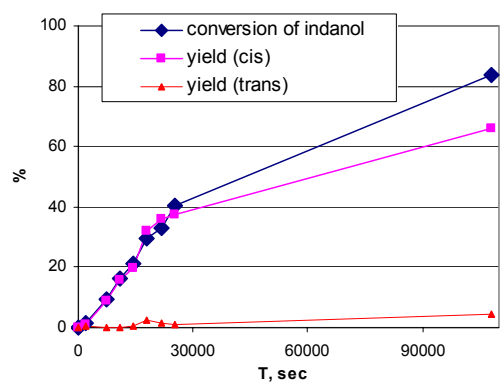

Ln of concentration of indanol

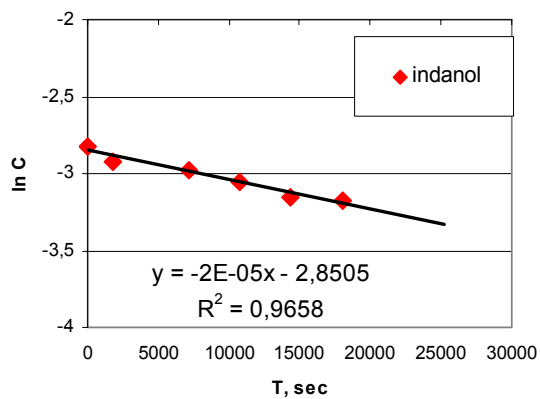

## Graphics for experiment 5.

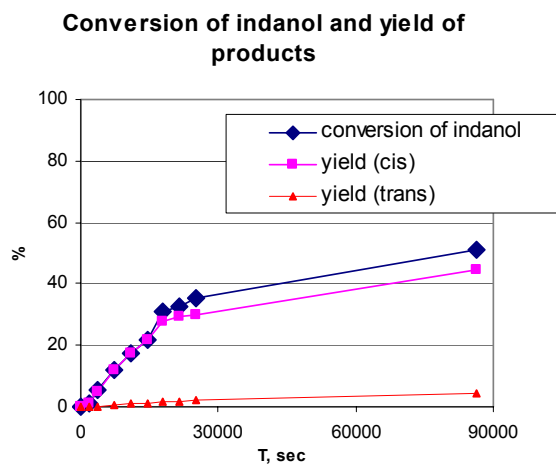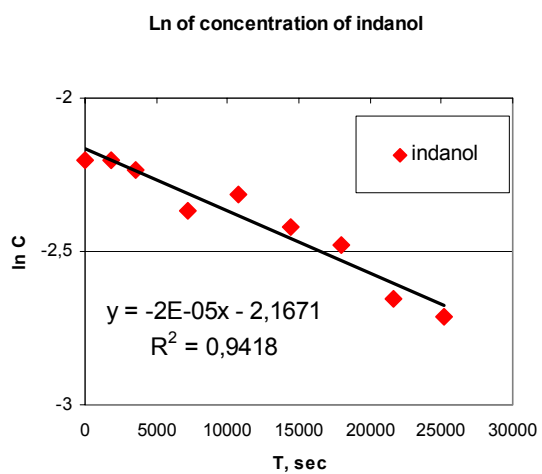

## Graphics for experiment 6.

Conversion of indanol and yield of products

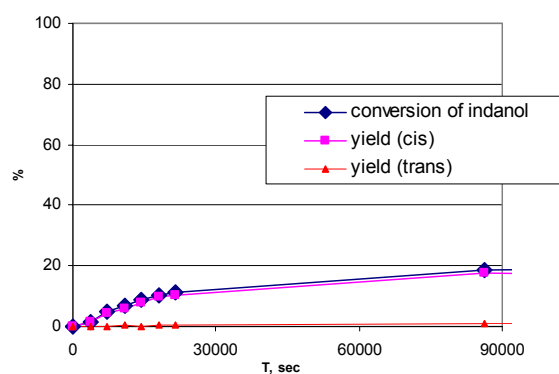

Ln of concentration of indanol

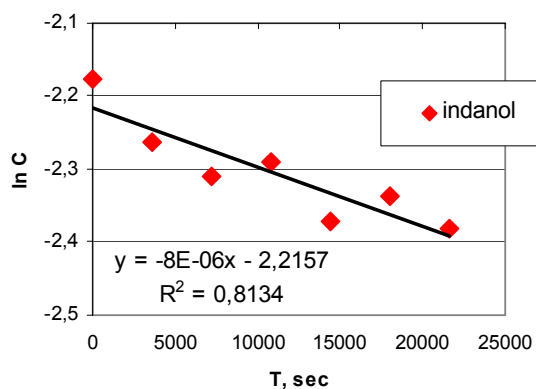

## Graphics for experiment 7.

Conversion of indanol and yield of products

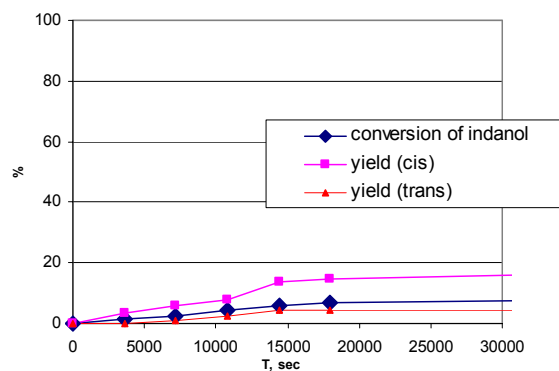

Ln of concentration of indanol

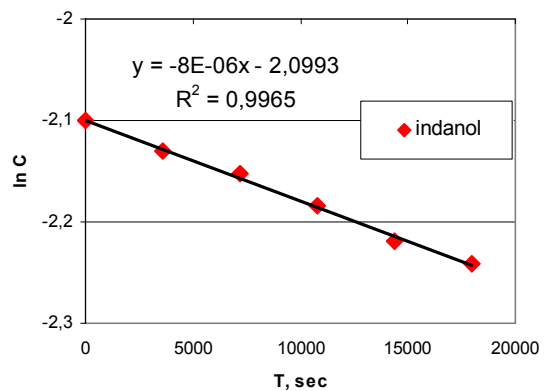

## Graphics for experiment 8.

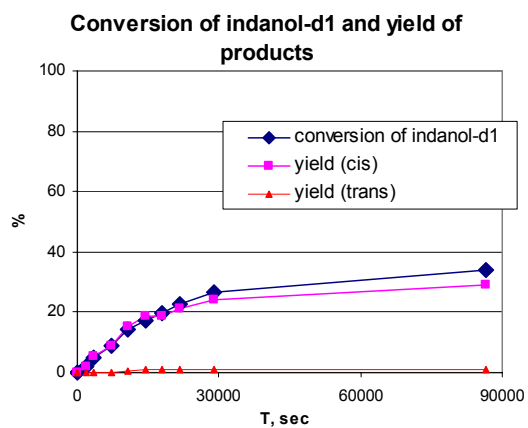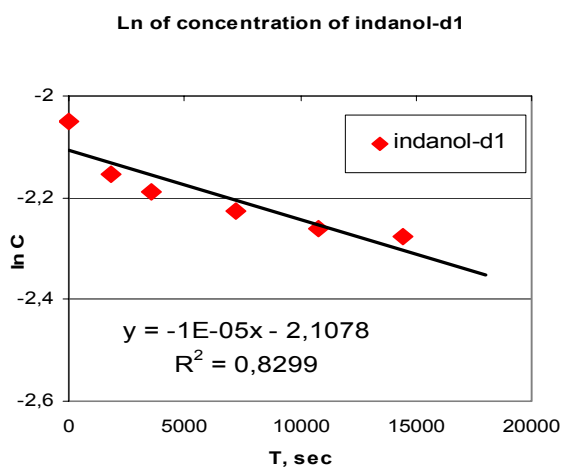

### Summary graphs for kinetic study.

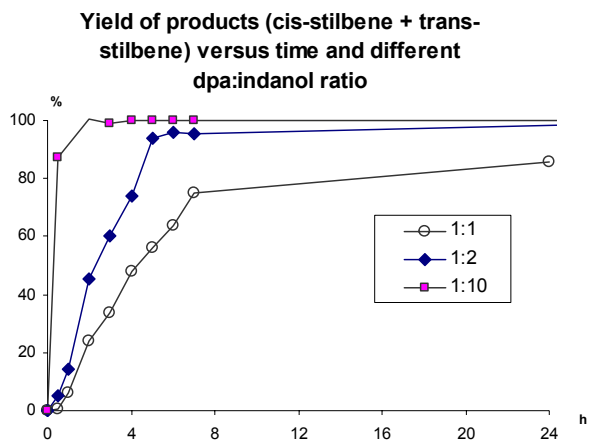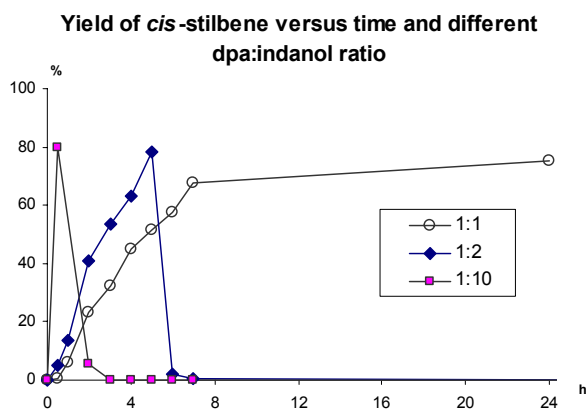

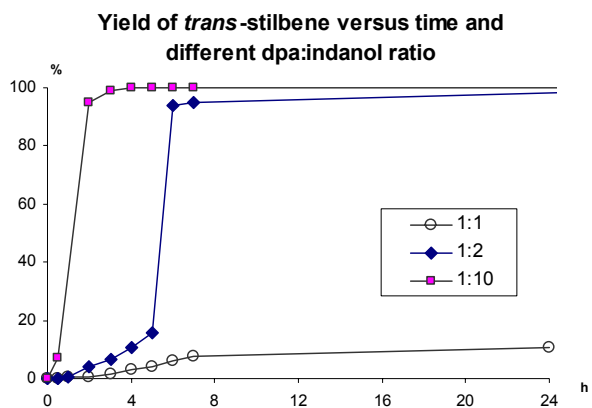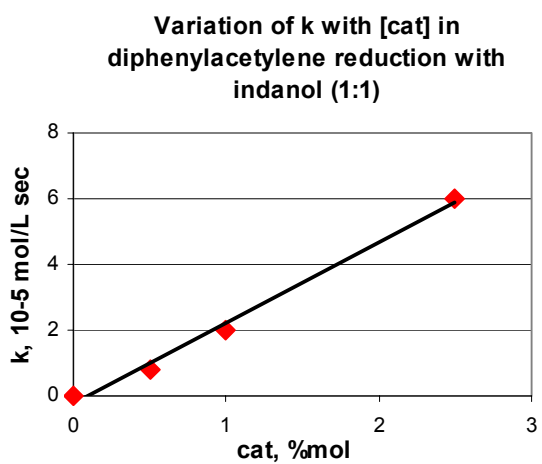



## 15. Hydrogenation of 7 in the presence of 10 %mol of 2a

**2a** (42 mg, 10 %mol, 0.05 mmol), diphenylacetylene **7** (89 mg, 0.5 mmol, 0.1 M), 1,3,5-tri-*tert*-butylbenzene (25 mg, 0.1 mmol), Na<sub>2</sub>CO<sub>3</sub> (60 mg, 0.57 mmol), distilled water (0.25 mL) and *i*-PrOH (5 mL) were mixed in a 100 mL Schlenk tube. The mixture was brought to reflux using a silicone oil bath (~90 °C). 1 mL samples were withdrawn after 16 and 90 h of the reaction.

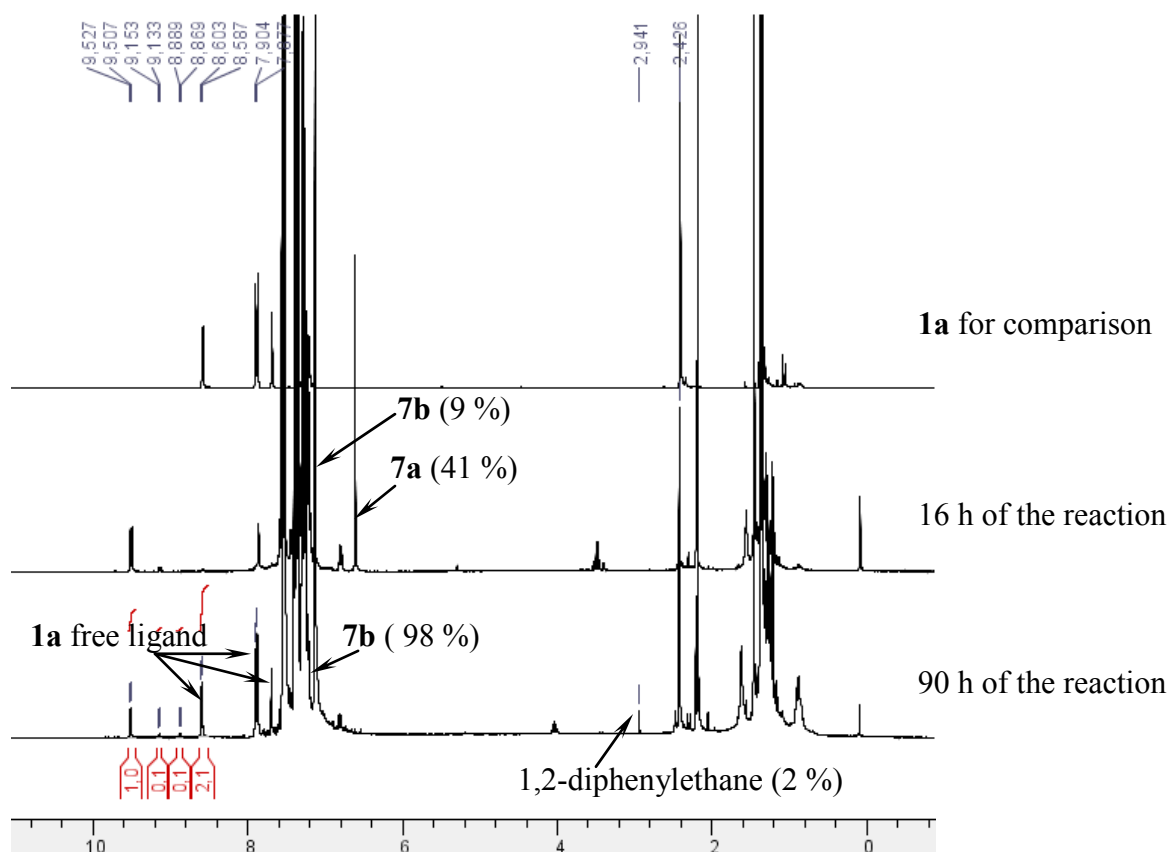

## B. Evaluation of catalysis inhibition by the products

### a) Hydrogenation of diphenylacetylene with 1-indanol (1:1)

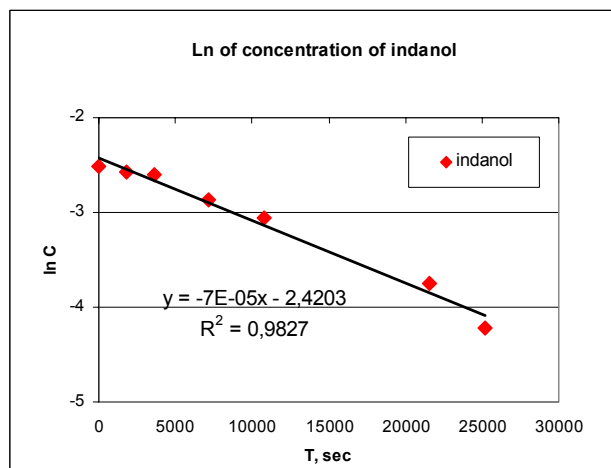

$$k = 7 * 10^{-5} \text{ s}^{-1}$$

### Hydrogenation of diphenylacetylene with 1-indanol in the presence of products:

#### b) Addition of 1 equivalent of cis-stilbene

$k = 5 * 10^{-6} \text{ s}^{-1}$  at 1:1 ratio with added 1 eq of *cis*-stilbene

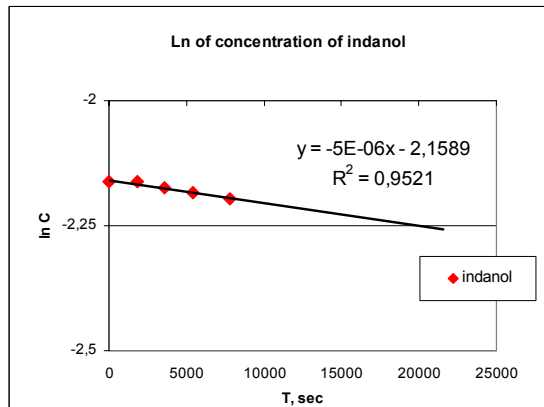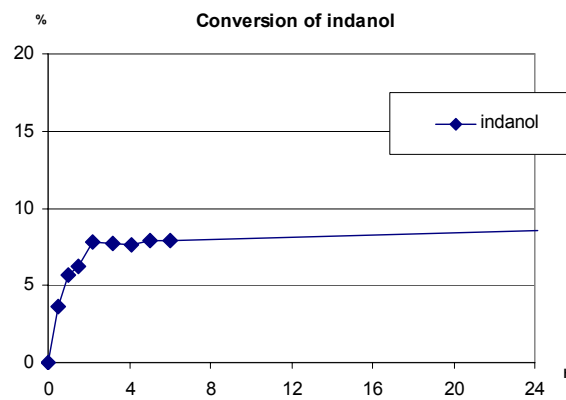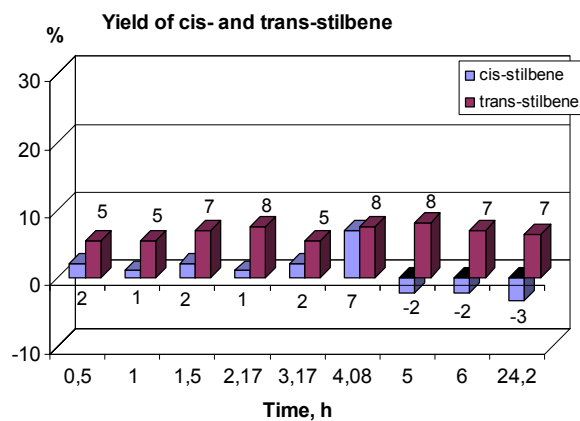

The rate of 1-indanol consumption in this case is 10 times slower in several few hours and this conversion does not exceed 10 %. This converted 10 % of alcohol serve to reduce diphenylacetylene to cis-stilbene ( $\Delta$  of cis-stilbene concentration is about 2-7 %) and isomerise the latter into trans-stilbene starting from the beginning of the reaction (not consecutively as it is the case in 1:1 reaction).

### c) Addition of 1 equivalent of cis-stilbene and 1 equivalent of 1-indanone

$k = 7 * 10^{-5} \text{ s}^{-1}$  at 1:1 ratio with added 1 eq of cis-stilbene and 1 eq of 1-indanone

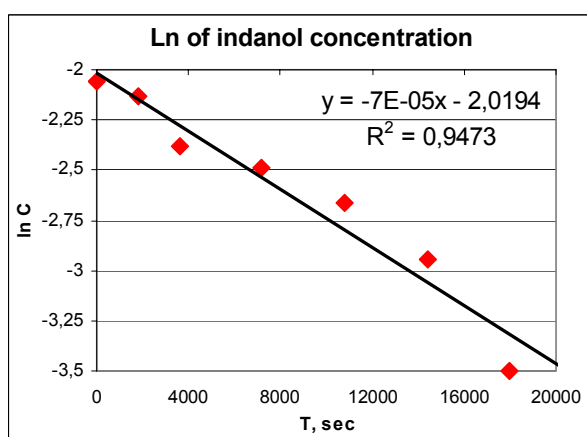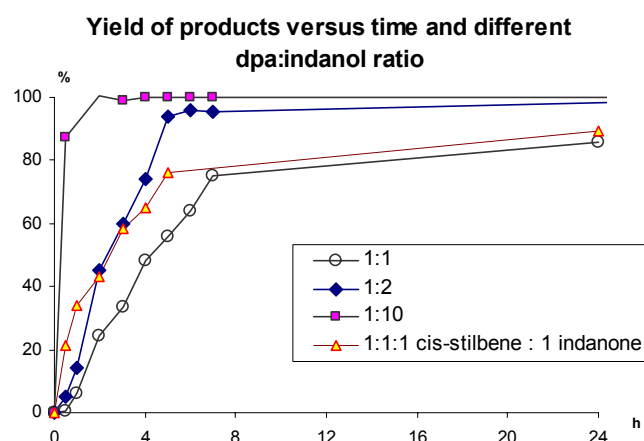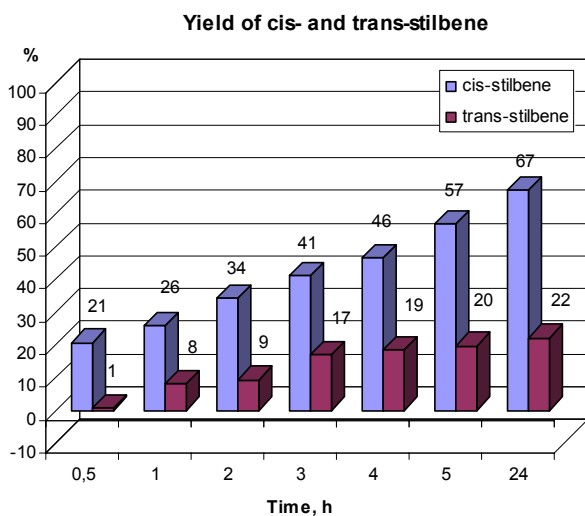

The rate of 1-indanol consumption in this case is the same as in the reaction '1:1' and the conversion after 24 h is 92 %. Summary yield of products complies with the conversion of alcohol (89 %). Here the intermediate moment of the reaction was demonstrated, which lead to the same quantitative results except selectivity. Trans-stilbene was forming as well as cis-stilbene from the beginning of the reaction while in the reaction of 1:1 (without products' addition) cis-stilbene is the major product after 24 h.

### Catalytic reduction of diphenylacetylene with 1-indanol in the presence of products.

Reactions were carried out using 2.5 molar % versus substrate of the catalyst **3b-b'** in a 100 mL Schlenk tube. Flush the Schlenk with argon, load calculated amount of the catalyst (24.2 mg), diphenylacetylene (200 mg, 1.122 mmol), 1-indanol (150.5 mg, 1.122 mmol), 1,3,5-*tert*-butylbenzene as internal standard (30.7 mg, 0.125 mmol), **7a** (202 mg, 1.122 mmol) sole or together with 1-indanone (150 mg, 1.122 mmol), add 10 mL of toluene under argon atmosphere and bring the solution slowly to 90°C. Withdraw 1 mL aliquots in another Schlenk tube before heating and at 1, 2, 3, 4, 5, 6, 7, 24 h, evaporate the solvent and add deuterated chloroform for NMR analysis.

**Reaction of 3b-b' with 1-indanone in the presence of D<sub>2</sub>O in toluene.** Reaction was carried out in a 100 mL Schlenk tube, which was filled with the catalyst **3b-b'** (5 molar %, 5 mg) and 1-indanone (15 mg, 0.11 mmol). Toluene (1.5 mL) and D<sub>2</sub>O (0.2 mL) were added and the solution was warmed slowly to 90°C with vigorous stirring. After 4 h the suspension was cooled to the room temperature and organic layer was removed in another Schlenk tube after filtering over MgSO<sub>4</sub>. D<sub>2</sub>O was washed with 1 mL of toluene, which passed through the filter and was added to the organic phase in the Schlenk. Then toluene was evaporated under reduced pressure and the residue was analysed by NMR using CDCl<sub>3</sub> as a solvent.

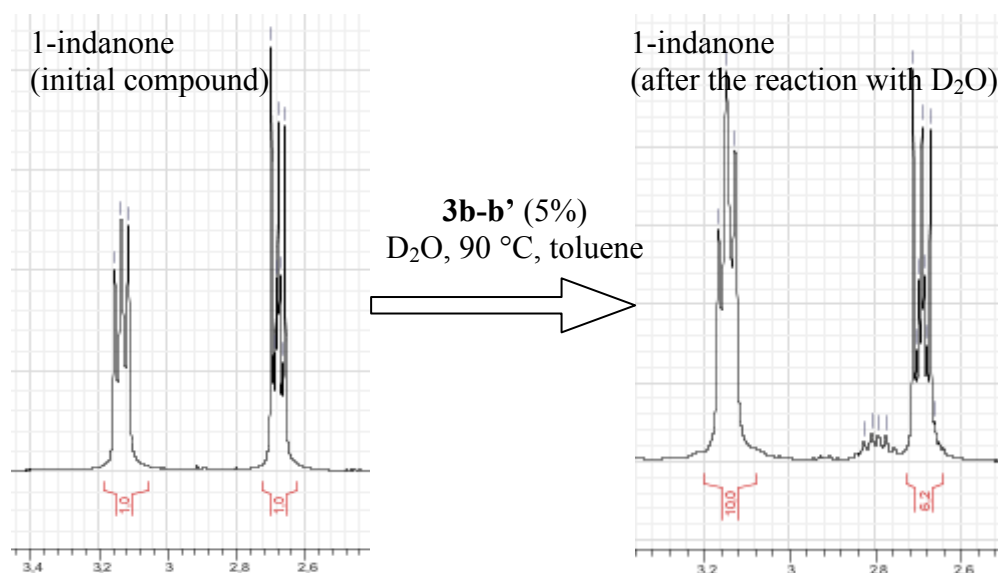

### C. Infrared spectra (ATR)

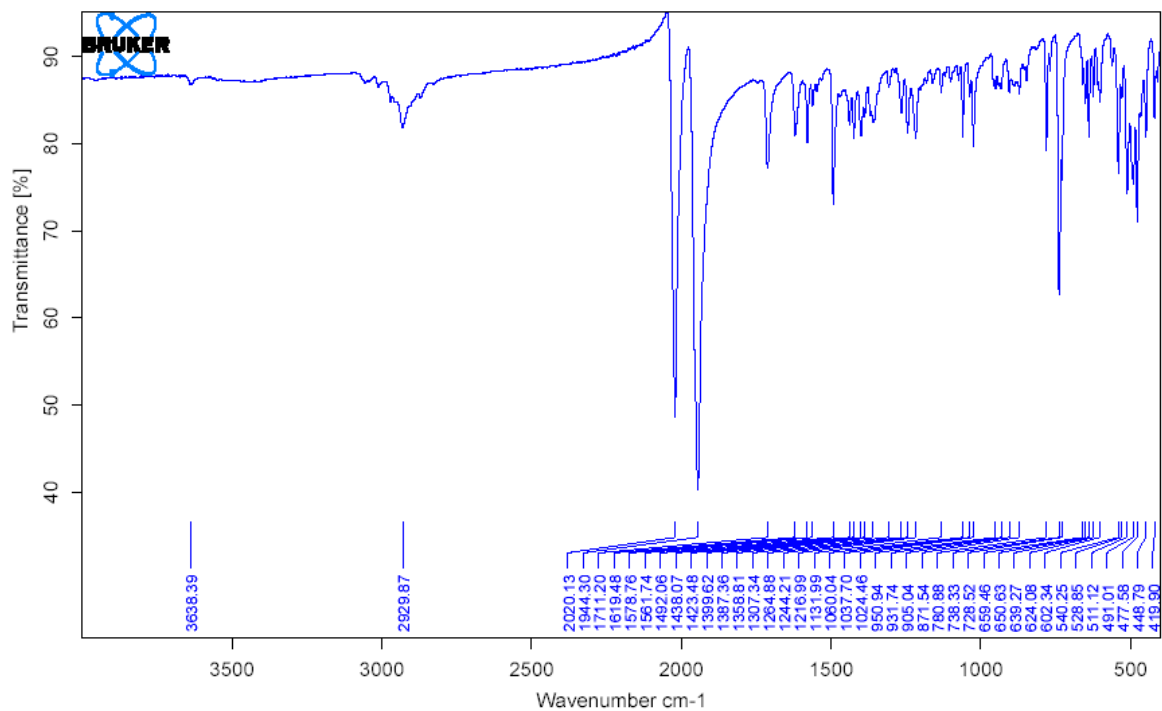

IR-spectrum of 3b-b'

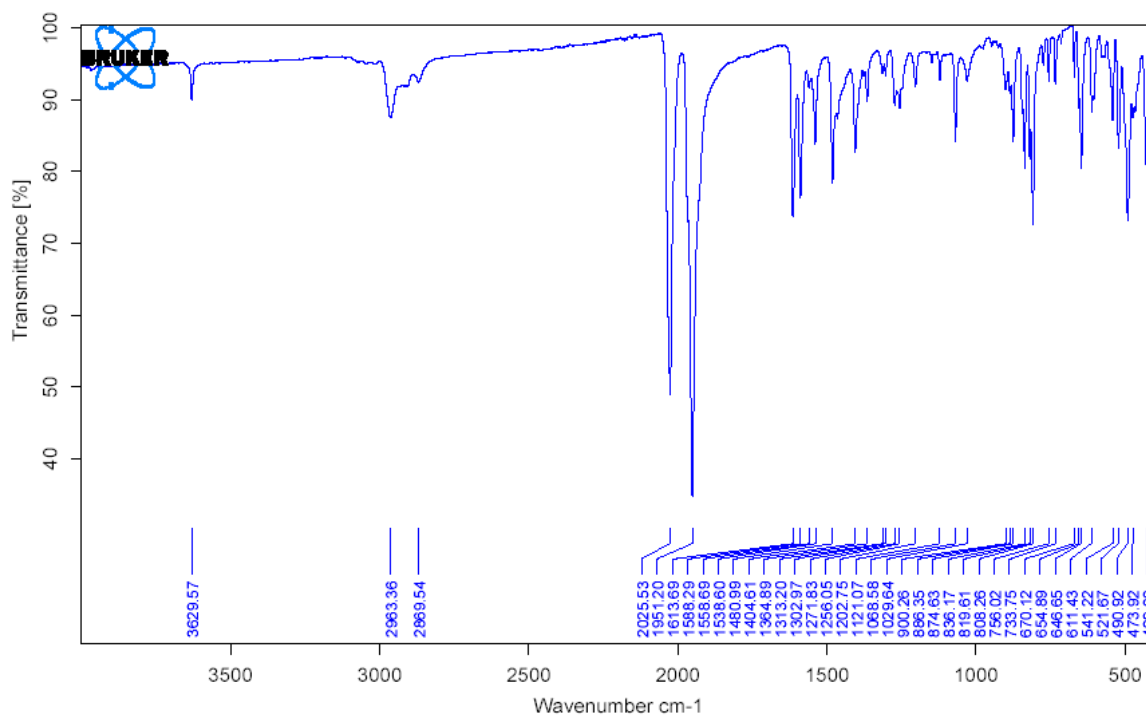

IR-spectrum of 3a

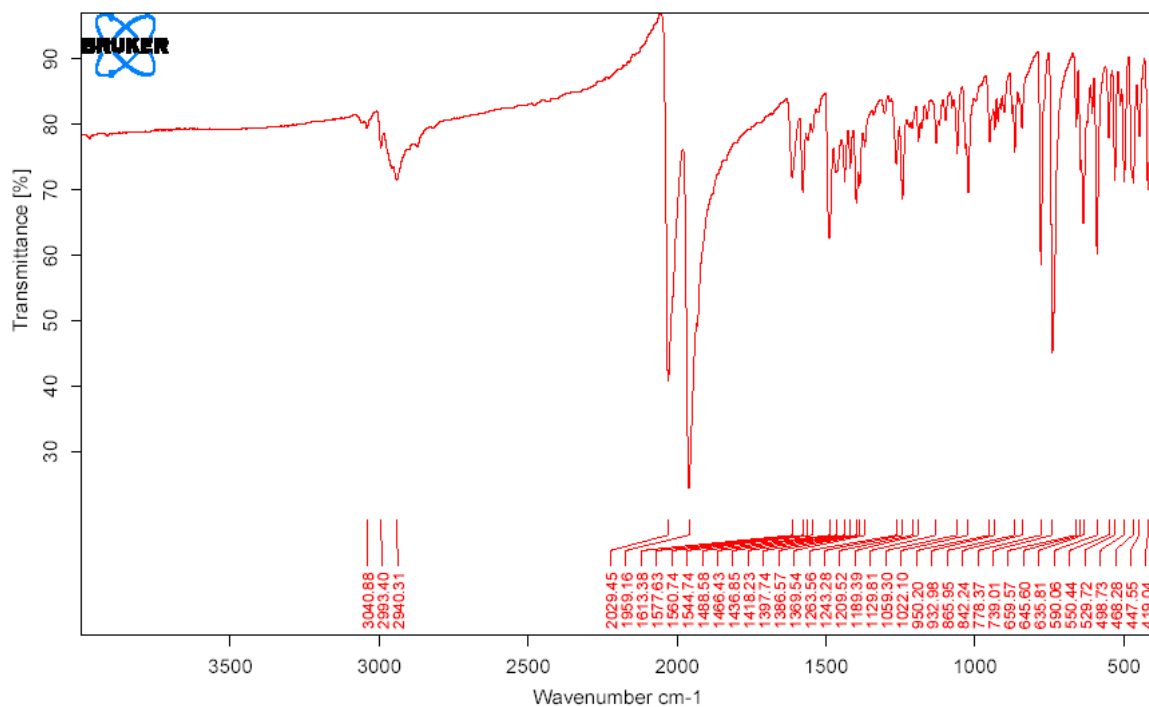

IR-spectrum of **2b**

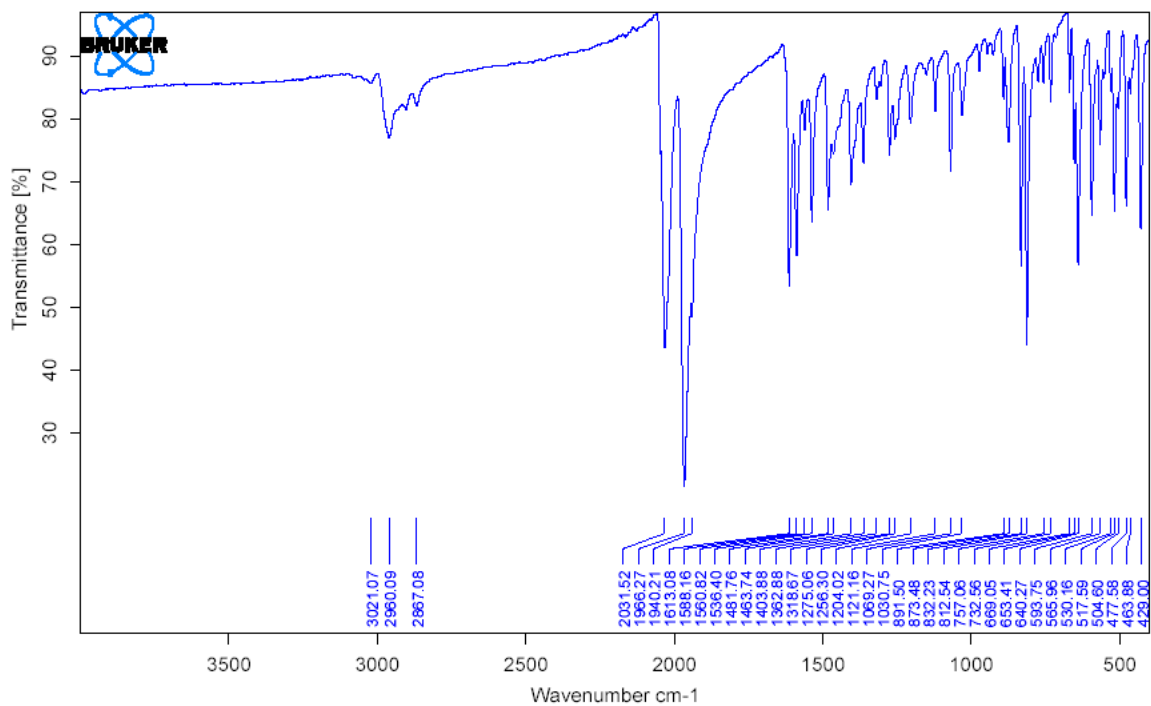

IR-spectrum of **2a**

### D. High Resolution MS (ESI+) of 1a

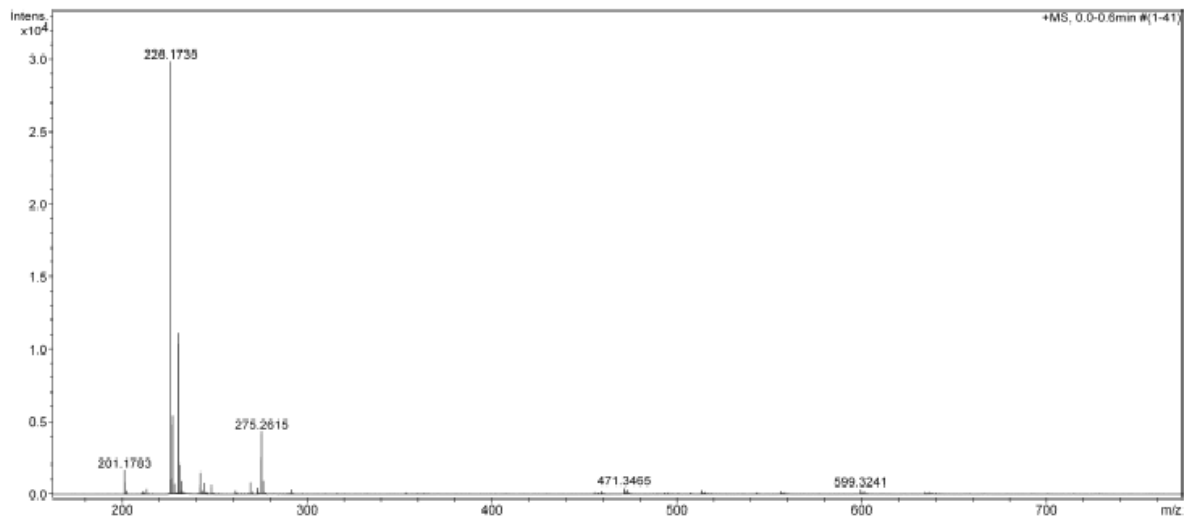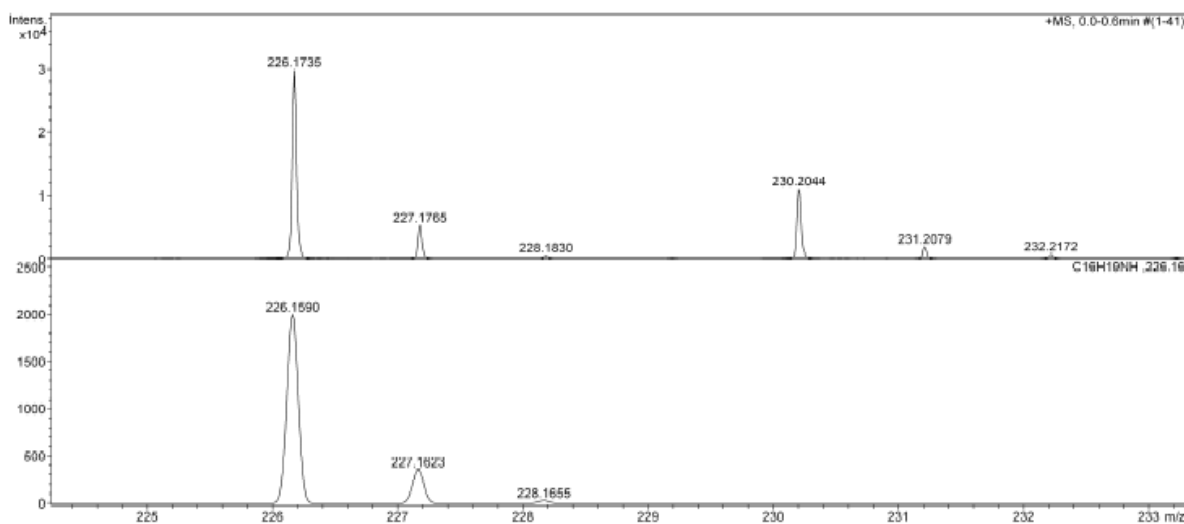

**E.  $^1\text{H}$  NMR diffusion ordered spectroscopy of **6a** and **2a** (reference).**

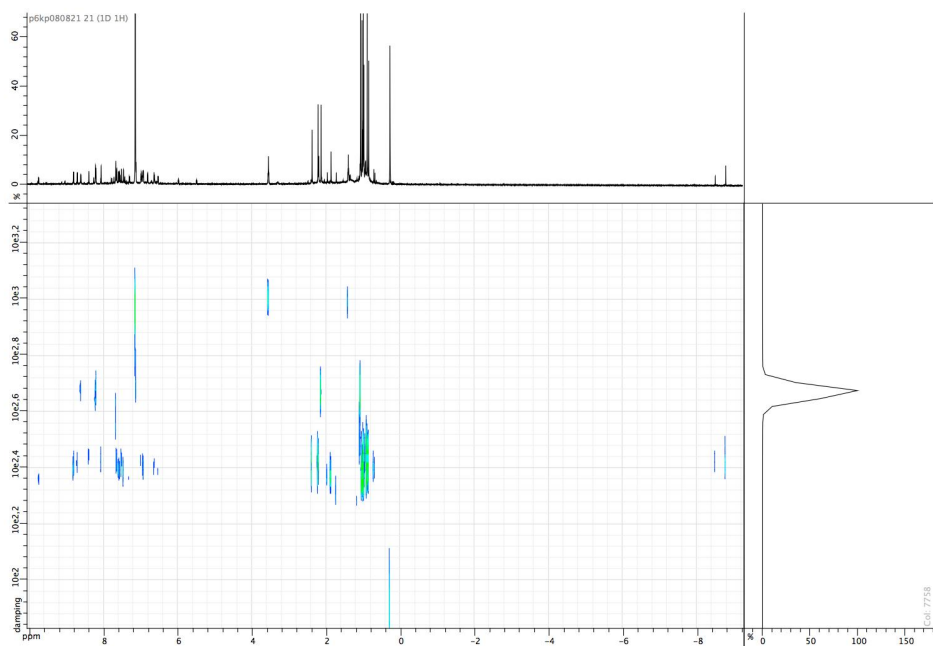

$^1\text{H}$  NMR DOSY map for **6a** in  $\text{C}_6\text{D}_6$ .

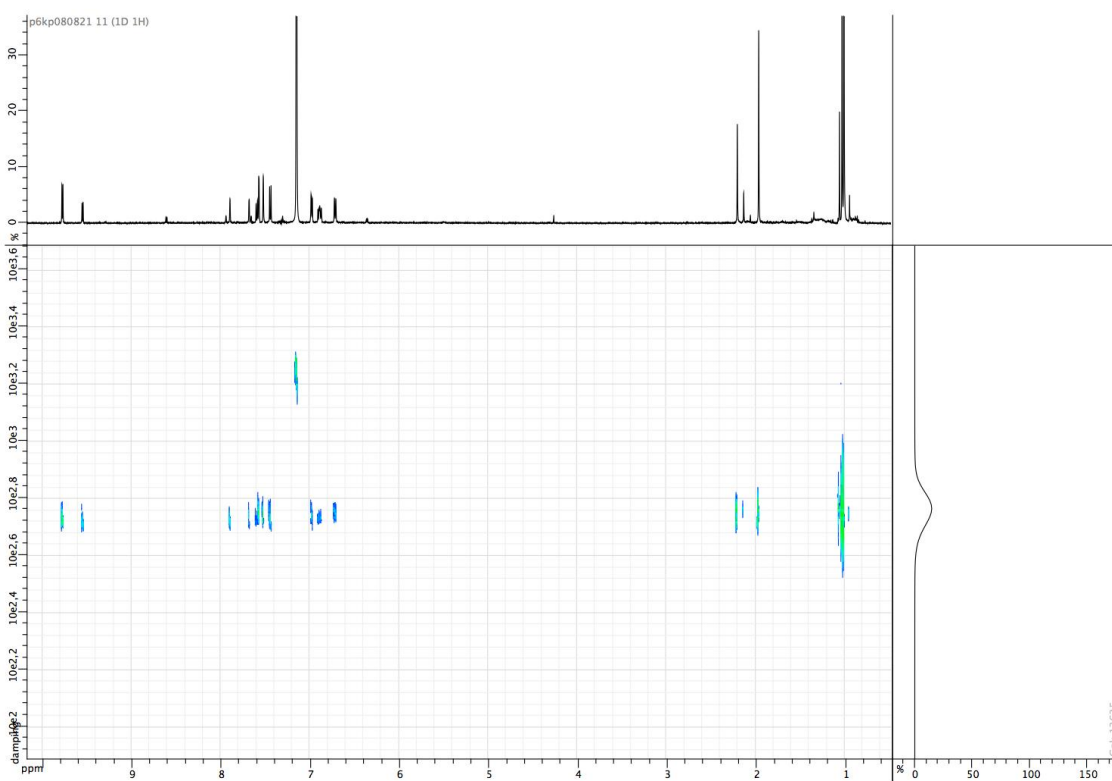

$^1\text{H}$  NMR DOSY map for **2a** in  $\text{C}_6\text{D}_6$ .



**F. CIF of the aborted structure of 2b showing the parallel relationship between chelating ligands.**

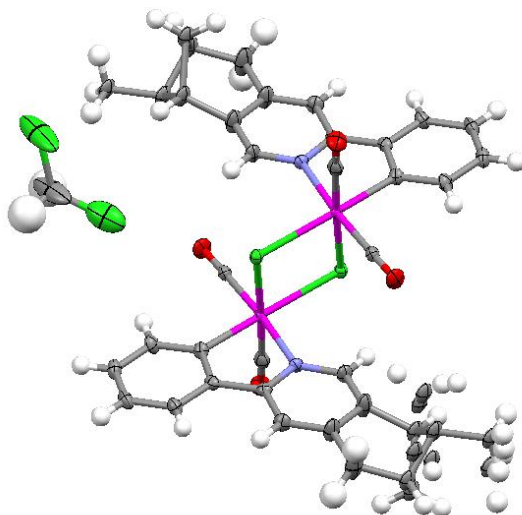

data\_2b

```
_audit_creation_method      SHELXL-97
_chemical_name_systematic
;
?
;
_chemical_name_common      ?
_chemical_melting_point    ?
_chemical_formula_moiety   'C38 H30 Cl2 N2 O4 Ru2, 2(C H2 Cl2)'
_chemical_formula_sum      'C40 H34 Cl6 N2 O4 Ru2'
_chemical_formula_weight   1021.53
```

loop\_

```
_atom_type_symbol
_atom_type_description
_atom_type_scatter_dispersion_real
_atom_type_scatter_dispersion_imag
_atom_type_scatter_source
'C' 'C' 0.0033 0.0016
'International Tables Vol C Tables 4.2.6.8 and 6.1.1.4'
'H' 'H' 0.0000 0.0000
'International Tables Vol C Tables 4.2.6.8 and 6.1.1.4'
'N' 'N' 0.0061 0.0033
'International Tables Vol C Tables 4.2.6.8 and 6.1.1.4'
'O' 'O' 0.0106 0.0060
'International Tables Vol C Tables 4.2.6.8 and 6.1.1.4'
'Cl' 'Cl' 0.1484 0.1585
'International Tables Vol C Tables 4.2.6.8 and 6.1.1.4'
'Ru' 'Ru' -1.2594 0.8363
'International Tables Vol C Tables 4.2.6.8 and 6.1.1.4'
```

```
_symmetry_cell_setting     'Monoclinic'
_symmetry_space_group_name_H-M 'C 2/c'
_symmetry_space_group_name_Hall '-C 2yc'
```

```
loop_
_symmetry_equiv_pos_as_xyz
'x, y, z'
'-x, y, -z+1/2'
'x+1/2, y+1/2, z'
'-x+1/2, y+1/2, -z+1/2'
'-x, -y, -z'
'x, -y, z-1/2'
'-x+1/2, -y+1/2, -z'
'x+1/2, -y+1/2, z-1/2'

_cell_length_a      21.6423(12)
_cell_length_b      9.6614(3)
_cell_length_c      22.2788(11)
_cell_angle_alpha   90.00
_cell_angle_beta    112.681(2)
_cell_angle_gamma   90.00
_cell_volume        4298.1(3)
_cell_formula_units_Z 4
_cell_measurement_temperature 173(2)
_cell_measurement_reflns_used 13807
_cell_measurement_theta_min 0.998
_cell_measurement_theta_max 27.485

_exptl_crystal_description 'prism'
_exptl_crystal_colour 'colorless'
_exptl_crystal_size_max 0.20
_exptl_crystal_size_mid 0.18
_exptl_crystal_size_min 0.15
_exptl_crystal_density_meas ?
_exptl_crystal_density_diffn 1.579
_exptl_crystal_density_method 'not measured'
_exptl_crystal_F_000 2040
_exptl_absorpt_coefficient_mu 1.117
_exptl_absorpt_correction_type 'none'
_exptl_absorpt_correction_T_min ?
_exptl_absorpt_correction_T_max ?
_exptl_absorpt_process_details ?

_exptl_special_details
;
?
;

_diffrn_ambient_temperature 173(2)
_diffrn_radiation_wavelength 0.71073
_diffrn_radiation_type MoK $\alpha$ 
_diffrn_radiation_source 'fine-focus sealed tube'
_diffrn_radiation_monochromator graphite
_diffrn_measurement_device_type 'KappaCCD'
_diffrn_measurement_method 'phi and omega scans'
_diffrn_detector_area_resol_mean ?
_diffrn_standards_number ?
_diffrn_standards_interval_count ?
_diffrn_standards_interval_time ?
_diffrn_standards_decay_% ?
_diffrn_reflns_number 14773
_diffrn_reflns_av_R_equivalents 0.0923
_diffrn_reflns_av_sigmaI/netI 0.0810
_diffrn_reflns_limit_h_min -25
_diffrn_reflns_limit_h_max 28
_diffrn_reflns_limit_k_min -12
_diffrn_reflns_limit_k_max 12
_diffrn_reflns_limit_l_min -28
_diffrn_reflns_limit_l_max 22
_diffrn_reflns_theta_min 1.98
_diffrn_reflns_theta_max 27.47
```

```
_reflns_number_total      4927
_reflns_number_gt         3987
_reflns_threshold_expression  l>2sigma(l)

_computing_data_collection  'Collect (Nonius B.V., 1998)'
_computing_cell_refinement  'Denzo (Nonius B.V., 1998)'
_computing_data_reduction   'Denzo (Nonius B.V., 1998)'
_computing_structure_solution 'SHELXS-97 (Sheldrick, 1997)'
_computing_structure_refinement 'SHELXL-97 (Sheldrick, 1997)'
_computing_molecular_graphics 'PLATON 98 (Spek, 1998)'
_computing_publication_material 'SHELXL-97 (Sheldrick, 1997)'

_refine_special_details
;
Refinement of F2 against ALL reflections. The weighted R-factor wR and
goodness of fit S are based on F2, conventional R-factors R are based
on F, with F set to zero for negative F2. The threshold expression of
F2 > 2sigma(F2) is used only for calculating R-factors(gt) etc. and is
not relevant to the choice of reflections for refinement. R-factors based
on F2 are statistically about twice as large as those based on F, and R-
factors based on ALL data will be even larger.
;

_refine_ls_structure_factor_coef Fsqd
_refine_ls_matrix_type      full
_refine_ls_weighting_scheme  calc
_refine_ls_weighting_details
'calc w=1/[sigma^2(Fo^2)+(0.0475P)^2+102.6484P] where P=(Fo^2+2Fc^2)/3'
_atom_sites_solution_primary direct
_atom_sites_solution_secondary difmap
_atom_sites_solution_hydrogens geom
_refine_ls_hydrogen_treatment constr
_refine_ls_extinction_method none
_refine_ls_extinction_coef   ?
_refine_ls_number_reflns     4927
_refine_ls_number_parameters 237
_refine_ls_number_restraints 0
_refine_ls_R_factor_all      0.1075
_refine_ls_R_factor_gt       0.0878
_refine_ls_wR_factor_ref     0.2160
_refine_ls_wR_factor_gt      0.2074
_refine_ls_goodness_of_fit_ref 1.187
_refine_ls_restrained_S_all  1.187
_refine_ls_shift/su_max      0.001
_refine_ls_shift/su_mean     0.000

loop_
_atom_site_label
_atom_site_type_symbol
_atom_site_fract_x
_atom_site_fract_y
_atom_site_fract_z
_atom_site_U_iso_or_equiv
_atom_site_adp_type
_atom_site_occupancy
_atom_site_symmetry_multiplicity
_atom_site_calc_flag
_atom_site_refinement_flags
_atom_site_disorder_assembly
_atom_site_disorder_group
C1 C 0.8798(4) 0.2558(9) 0.0156(4) 0.0307(17) Uani 1 1 d . . .
C2 C 0.8992(5) 0.1908(9) 0.1342(5) 0.040(2) Uani 1 1 d . . .
C3 C 0.8669(4) -0.0280(8) 0.0489(4) 0.0293(17) Uani 1 1 d . . .
C4 C 0.9170(4) -0.0624(10) 0.0273(5) 0.038(2) Uani 1 1 d . . .
H4 H 0.9399 0.0094 0.0151 0.046 Uiso 1 1 calc R . .
C5 C 0.9348(5) -0.2007(10) 0.0229(5) 0.040(2) Uani 1 1 d . . .
H5 H 0.9701 -0.2218 0.0090 0.048 Uiso 1 1 calc R . .
```

C6 C 0.9009(5) -0.3055(10) 0.0387(5) 0.042(2) Uani 1 1 d . . .  
H6 H 0.9125 -0.3991 0.0352 0.051 Uiso 1 1 calc R . .  
C7 C 0.8495(5) -0.2759(9) 0.0601(4) 0.0364(19) Uani 1 1 d . . .  
H7 H 0.8261 -0.3488 0.0707 0.044 Uiso 1 1 calc R . .  
C8 C 0.8329(4) -0.1384(8) 0.0657(4) 0.0305(17) Uani 1 1 d . . .  
C9 C 0.7821(4) -0.0985(8) 0.0905(4) 0.0278(16) Uani 1 1 d . . .  
C10 C 0.7464(5) -0.1926(9) 0.1133(5) 0.038(2) Uani 1 1 d . . .  
H10 H 0.7516 -0.2894 0.1093 0.046 Uiso 1 1 calc R . .  
C11 C 0.7043(6) -0.1450(10) 0.1412(6) 0.054(3) Uani 1 1 d . B .  
C12 C 0.6989(7) -0.0003(10) 0.1486(6) 0.059(3) Uani 1 1 d . . .  
C13 C 0.7338(5) 0.0861(9) 0.1249(5) 0.039(2) Uani 1 1 d . . .  
H13 H 0.7297 0.1832 0.1291 0.046 Uiso 1 1 calc R . .  
C14 C 0.6647(8) -0.2416(12) 0.1676(8) 0.080(5) Uani 1 1 d . . .  
H14A H 0.6925 -0.3225 0.1891 0.097 Uiso 1 1 calc R A 1  
H14B H 0.6242 -0.2756 0.1315 0.097 Uiso 1 1 calc R A 1  
C15 C 0.6440(10) -0.159(2) 0.2181(10) 0.0428(15) Uani 0.50 1 d P B 1  
H15 H 0.6210 -0.2159 0.2407 0.051 Uiso 0.50 1 calc PR B 1  
C16 C 0.7040(10) -0.0585(19) 0.2670(10) 0.0428(15) Uani 0.50 1 d P B 1  
H16A H 0.6972 -0.0242 0.3059 0.051 Uiso 0.50 1 calc PR B 1  
H16B H 0.7502 -0.0921 0.2775 0.051 Uiso 0.50 1 calc PR B 1  
C17 C 0.6733(11) 0.039(2) 0.2027(10) 0.0428(15) Uani 0.50 1 d P B 1  
H17 H 0.6722 0.1404 0.2113 0.051 Uiso 0.50 1 calc PR B 1  
C18 C 0.6024(10) -0.039(2) 0.1788(10) 0.0428(15) Uani 0.50 1 d P B 1  
C19 C 0.5581(10) 0.024(2) 0.2113(10) 0.0428(15) Uani 0.50 1 d P B 1  
H19A H 0.5776 0.0047 0.2581 0.064 Uiso 0.50 1 calc PR B 1  
H19B H 0.5131 -0.0160 0.1922 0.064 Uiso 0.50 1 calc PR B 1  
H19C H 0.5552 0.1247 0.2045 0.064 Uiso 0.50 1 calc PR B 1  
C15B C 0.6038(11) -0.146(2) 0.1774(10) 0.0428(15) Uani 0.50 1 d P B 2  
H15B H 0.5726 -0.1996 0.1920 0.051 Uiso 0.50 1 calc PR B 2  
C16B C 0.5671(10) -0.0452(19) 0.1161(10) 0.0428(15) Uani 0.50 1 d P B 2  
H16C H 0.5235 -0.0067 0.1129 0.051 Uiso 0.50 1 calc PR B 2  
H16D H 0.5662 -0.0786 0.0738 0.051 Uiso 0.50 1 calc PR B 2  
C17B C 0.6369(11) 0.050(2) 0.1624(11) 0.0428(15) Uani 0.50 1 d P B 2  
H17B H 0.6308 0.1522 0.1643 0.051 Uiso 0.50 1 calc PR B 2  
C18B C 0.6454(11) -0.036(2) 0.2260(10) 0.0428(15) Uani 0.50 1 d P B 2  
C19B C 0.6016(10) 0.033(2) 0.2597(10) 0.0428(15) Uani 0.50 1 d P B 2  
H19D H 0.6160 0.1291 0.2708 0.064 Uiso 0.50 1 calc PR B 2  
H19E H 0.6071 -0.0180 0.2995 0.064 Uiso 0.50 1 calc PR B 2  
H19F H 0.5544 0.0312 0.2300 0.064 Uiso 0.50 1 calc PR B 2  
N1 N 0.7741(3) 0.0396(7) 0.0956(3) 0.0286(14) Uani 1 1 d . . .  
O1 O 0.9126(3) 0.3117(7) -0.0066(4) 0.0497(17) Uani 1 1 d . . .  
O2 O 0.9430(4) 0.2085(8) 0.1807(4) 0.0546(19) Uani 1 1 d . . .  
Cl1 Cl 0.73861(10) 0.12022(19) -0.05282(9) 0.0282(4) Uani 1 1 d . . .  
Ru1 Ru 0.82900(3) 0.16353(6) 0.05446(3) 0.0255(2) Uani 1 1 d . . .  
Cl2 Cl 0.9022(3) 0.0840(5) -0.1308(3) 0.135(2) Uani 1 1 d . . .  
Cl3 Cl 0.9040(4) 0.0932(7) -0.2618(3) 0.218(5) Uani 1 1 d . . .  
C20 C 0.9440(14) 0.0683(19) -0.1779(8) 0.161(12) Uani 1 1 d . . .  
H20A H 0.9635 -0.0258 -0.1711 0.193 Uiso 1 1 calc R . .  
H20B H 0.9819 0.1342 -0.1619 0.193 Uiso 1 1 calc R . .

loop\_

\_atom\_site\_aniso\_label  
\_atom\_site\_aniso\_U\_11  
\_atom\_site\_aniso\_U\_22  
\_atom\_site\_aniso\_U\_33  
\_atom\_site\_aniso\_U\_23  
\_atom\_site\_aniso\_U\_13  
\_atom\_site\_aniso\_U\_12  
C1 0.028(4) 0.032(4) 0.033(4) 0.003(3) 0.013(3) 0.006(3)  
C2 0.047(6) 0.028(5) 0.053(6) 0.003(4) 0.028(5) 0.005(4)  
C3 0.028(4) 0.026(4) 0.034(4) -0.005(3) 0.012(3) -0.005(3)  
C4 0.024(4) 0.040(5) 0.054(6) 0.002(4) 0.018(4) 0.003(4)  
C5 0.033(5) 0.044(5) 0.046(5) -0.011(4) 0.017(4) 0.004(4)  
C6 0.038(5) 0.036(5) 0.050(5) -0.004(4) 0.013(4) 0.013(4)  
C7 0.034(5) 0.029(4) 0.046(5) 0.000(4) 0.015(4) 0.005(4)  
C8 0.032(4) 0.028(4) 0.028(4) 0.000(3) 0.007(3) 0.002(3)  
C9 0.029(4) 0.027(4) 0.024(4) 0.000(3) 0.007(3) -0.003(3)

C10 0.047(5) 0.023(4) 0.050(5) -0.002(4) 0.024(4) -0.007(4)  
C11 0.073(7) 0.032(5) 0.084(8) -0.001(5) 0.060(7) -0.007(5)  
C12 0.082(8) 0.034(5) 0.093(9) 0.002(5) 0.070(7) -0.001(5)  
C13 0.044(5) 0.028(4) 0.057(6) 0.005(4) 0.034(5) -0.002(4)  
C14 0.111(11) 0.044(7) 0.137(13) 0.000(7) 0.103(11) -0.009(7)  
C15 0.049(4) 0.040(3) 0.057(4) 0.000(3) 0.040(3) -0.010(3)  
C16 0.049(4) 0.040(3) 0.057(4) 0.000(3) 0.040(3) -0.010(3)  
C17 0.049(4) 0.040(3) 0.057(4) 0.000(3) 0.040(3) -0.010(3)  
C18 0.049(4) 0.040(3) 0.057(4) 0.000(3) 0.040(3) -0.010(3)  
C19 0.049(4) 0.040(3) 0.057(4) 0.000(3) 0.040(3) -0.010(3)  
C15B 0.049(4) 0.040(3) 0.057(4) 0.000(3) 0.040(3) -0.010(3)  
C16B 0.049(4) 0.040(3) 0.057(4) 0.000(3) 0.040(3) -0.010(3)  
C17B 0.049(4) 0.040(3) 0.057(4) 0.000(3) 0.040(3) -0.010(3)  
C18B 0.049(4) 0.040(3) 0.057(4) 0.000(3) 0.040(3) -0.010(3)  
C19B 0.049(4) 0.040(3) 0.057(4) 0.000(3) 0.040(3) -0.010(3)  
N1 0.027(3) 0.026(3) 0.036(4) 0.004(3) 0.016(3) -0.002(3)  
O1 0.043(4) 0.049(4) 0.071(5) 0.010(3) 0.038(4) -0.008(3)  
O2 0.037(4) 0.070(5) 0.046(4) -0.005(4) 0.005(3) 0.000(4)  
Cl1 0.0289(9) 0.0256(9) 0.0317(10) -0.0023(7) 0.0134(8) -0.0004(7)  
Ru1 0.0233(3) 0.0263(3) 0.0298(3) 0.0013(3) 0.0136(2) 0.0002(3)  
Cl2 0.121(4) 0.079(3) 0.145(5) -0.006(3) -0.015(4) -0.019(3)  
Cl3 0.252(8) 0.184(6) 0.086(3) -0.077(4) -0.082(4) 0.137(6)  
C20 0.23(3) 0.099(13) 0.058(9) -0.038(9) -0.049(13) 0.077(15)

\_geom\_special\_details

;

All esds (except the esd in the dihedral angle between two l.s. planes) are estimated using the full covariance matrix. The cell esds are taken into account individually in the estimation of esds in distances, angles and torsion angles; correlations between esds in cell parameters are only used when they are defined by crystal symmetry. An approximate (isotropic) treatment of cell esds is used for estimating esds involving l.s. planes.

;

loop\_

\_geom\_bond\_atom\_site\_label\_1  
\_geom\_bond\_atom\_site\_label\_2  
\_geom\_bond\_distance  
\_geom\_bond\_site\_symmetry\_2  
\_geom\_bond\_publ\_flag  
C1 O1 1.145(10) . ?  
C1 Ru1 1.868(8) . ?  
C2 O2 1.115(12) . ?  
C2 Ru1 1.858(11) . ?  
C3 C4 1.386(12) . ?  
C3 C8 1.426(11) . ?  
C3 Ru1 2.048(8) . ?  
C4 C5 1.405(13) . ?  
C4 H4 0.9500 . ?  
C5 C6 1.375(14) . ?  
C5 H5 0.9500 . ?  
C6 C7 1.397(13) . ?  
C6 H6 0.9500 . ?  
C7 C8 1.394(11) . ?  
C7 H7 0.9500 . ?  
C8 C9 1.458(12) . ?  
C9 N1 1.356(10) . ?  
C9 C10 1.411(11) . ?  
C10 C11 1.365(13) . ?  
C10 H10 0.9500 . ?  
C11 C12 1.418(14) . ?  
C11 C14 1.528(14) . ?  
C12 C13 1.363(13) . ?  
C12 C17 1.55(2) . ?  
C12 C17B 1.56(2) . ?  
C13 N1 1.351(11) . ?  
C13 H13 0.9500 . ?

C14 C15 1.58(2) . ?  
C14 C15B 1.69(2) . ?  
C14 H14A 0.9900 . ?  
C14 H14B 0.9900 . ?  
C15 C18 1.52(3) . ?  
C15 C16 1.65(3) . ?  
C15 H15 1.0000 . ?  
C16 C17 1.63(3) . ?  
C16 H16A 0.9900 . ?  
C16 H16B 0.9900 . ?  
C17 C18 1.61(3) . ?  
C17 H17 1.0000 . ?  
C18 C19 1.53(2) . ?  
C19 H19A 0.9800 . ?  
C19 H19B 0.9800 . ?  
C19 H19C 0.9800 . ?  
C15B C18B 1.53(3) . ?  
C15B C16B 1.61(3) . ?  
C15B H15B 1.0000 . ?  
C16B C17B 1.73(3) . ?  
C16B H16C 0.9900 . ?  
C16B H16D 0.9900 . ?  
C17B C18B 1.59(3) . ?  
C17B H17B 1.0000 . ?  
C18B C19B 1.57(3) . ?  
C19B H19D 0.9800 . ?  
C19B H19E 0.9800 . ?  
C19B H19F 0.9800 . ?  
N1 Ru1 2.127(6) . ?  
Cl1 Ru1 2.472(2) . ?  
Cl1 Ru1 2.543(2) 7\_655 ?  
Ru1 Cl1 2.543(2) 7\_655 ?  
Cl2 C20 1.63(3) . ?  
Cl3 C20 1.747(16) . ?  
C20 H20A 0.9900 . ?  
C20 H20B 0.9900 . ?

loop\_

\_geom\_angle\_atom\_site\_label\_1  
\_geom\_angle\_atom\_site\_label\_2  
\_geom\_angle\_atom\_site\_label\_3  
\_geom\_angle  
\_geom\_angle\_site\_symmetry\_1  
\_geom\_angle\_site\_symmetry\_3  
\_geom\_angle\_publ\_flag  
O1 C1 Ru1 178.0(8) . . ?  
O2 C2 Ru1 176.9(9) . . ?  
C4 C3 C8 117.7(8) . . ?  
C4 C3 Ru1 128.6(6) . . ?  
C8 C3 Ru1 113.6(6) . . ?  
C3 C4 C5 121.7(8) . . ?  
C3 C4 H4 119.2 . . ?  
C5 C4 H4 119.2 . . ?  
C6 C5 C4 119.6(8) . . ?  
C6 C5 H5 120.2 . . ?  
C4 C5 H5 120.2 . . ?  
C5 C6 C7 120.7(8) . . ?  
C5 C6 H6 119.6 . . ?  
C7 C6 H6 119.6 . . ?  
C8 C7 C6 119.5(9) . . ?  
C8 C7 H7 120.2 . . ?  
C6 C7 H7 120.2 . . ?  
C7 C8 C3 120.7(8) . . ?  
C7 C8 C9 123.0(8) . . ?  
C3 C8 C9 116.3(7) . . ?  
N1 C9 C10 119.9(8) . . ?  
N1 C9 C8 115.6(7) . . ?

C10 C9 C8 124.3(7) . . ?  
C11 C10 C9 120.2(8) . . ?  
C11 C10 H10 119.9 . . ?  
C9 C10 H10 119.9 . . ?  
C10 C11 C12 118.9(9) . . ?  
C10 C11 C14 122.7(9) . . ?  
C12 C11 C14 118.3(9) . . ?  
C13 C12 C11 118.4(9) . . ?  
C13 C12 C17 124.6(11) . . ?  
C11 C12 C17 113.6(11) . . ?  
C13 C12 C17B 122.2(11) . . ?  
C11 C12 C17B 116.3(11) . . ?  
N1 C13 C12 122.8(8) . . ?  
N1 C13 H13 118.6 . . ?  
C12 C13 H13 118.6 . . ?  
C11 C14 C15 108.6(11) . . ?  
C11 C14 C15B 107.2(10) . . ?  
C11 C14 H14A 110.0 . . ?  
C15 C14 H14A 110.0 . . ?  
C15B C14 H14A 136.7 . . ?  
C11 C14 H14B 110.0 . . ?  
C15 C14 H14B 110.0 . . ?  
C15B C14 H14B 78.2 . . ?  
H14A C14 H14B 108.4 . . ?  
C18 C15 C14 104.1(15) . . ?  
C18 C15 C16 94.3(15) . . ?  
C14 C15 C16 113.7(14) . . ?  
C18 C15 H15 114.2 . . ?  
C14 C15 H15 114.2 . . ?  
C16 C15 H15 114.2 . . ?  
C17 C16 C15 78.9(14) . . ?  
C17 C16 H16A 115.4 . . ?  
C15 C16 H16A 115.4 . . ?  
C17 C16 H16B 115.4 . . ?  
C15 C16 H16B 115.4 . . ?  
H16A C16 H16B 112.4 . . ?  
C12 C17 C18 102.1(15) . . ?  
C12 C17 C16 113.3(15) . . ?  
C18 C17 C16 92.0(14) . . ?  
C12 C17 H17 115.5 . . ?  
C18 C17 H17 115.5 . . ?  
C16 C17 H17 115.5 . . ?  
C15 C18 C19 111.7(16) . . ?  
C15 C18 C17 83.5(15) . . ?  
C19 C18 C17 110.4(16) . . ?  
C18B C15B C16B 98.4(15) . . ?  
C18B C15B C14 101.2(15) . . ?  
C16B C15B C14 111.9(13) . . ?  
C18B C15B H15B 114.5 . . ?  
C16B C15B H15B 114.5 . . ?  
C14 C15B H15B 114.5 . . ?  
C15B C16B C17B 77.5(14) . . ?  
C15B C16B H16C 115.6 . . ?  
C17B C16B H16C 115.6 . . ?  
C15B C16B H16D 115.6 . . ?  
C17B C16B H16D 115.6 . . ?  
H16C C16B H16D 112.6 . . ?  
C12 C17B C18B 101.5(15) . . ?  
C12 C17B C16B 109.7(14) . . ?  
C18B C17B C16B 91.5(13) . . ?  
C12 C17B H17B 116.8 . . ?  
C18B C17B H17B 116.8 . . ?  
C16B C17B H17B 116.8 . . ?  
C15B C18B C19B 109.6(16) . . ?  
C15B C18B C17B 84.1(15) . . ?  
C19B C18B C17B 108.6(16) . . ?  
C18B C19B H19D 109.5 . . ?

C18B C19B H19E 109.5 . . ?  
H19D C19B H19E 109.5 . . ?  
C18B C19B H19F 109.5 . . ?  
H19D C19B H19F 109.5 . . ?  
H19E C19B H19F 109.5 . . ?  
C13 N1 C9 119.7(7) . . ?  
C13 N1 Ru1 126.3(5) . . ?  
C9 N1 Ru1 114.0(5) . . ?  
Ru1 Cl1 Ru1 96.39(7) . 7\_655 ?  
C2 Ru1 C1 88.0(4) . . ?  
C2 Ru1 C3 89.3(3) . . ?  
C1 Ru1 C3 94.7(3) . . ?  
C2 Ru1 N1 93.1(3) . . ?  
C1 Ru1 N1 174.2(3) . . ?  
C3 Ru1 N1 79.7(3) . . ?  
C2 Ru1 Cl1 177.6(3) . . ?  
C1 Ru1 Cl1 91.2(3) . . ?  
C3 Ru1 Cl1 88.6(2) . . ?  
N1 Ru1 Cl1 87.46(19) . . ?  
C2 Ru1 Cl1 98.7(3) . 7\_655 ?  
C1 Ru1 Cl1 92.3(3) . 7\_655 ?  
C3 Ru1 Cl1 169.6(2) . 7\_655 ?  
N1 Ru1 Cl1 93.12(19) . 7\_655 ?  
Cl1 Ru1 Cl1 83.61(7) . 7\_655 ?  
Cl2 C20 Cl3 120.4(15) . . ?  
Cl2 C20 H20A 107.2 . . ?  
Cl3 C20 H20A 107.2 . . ?  
Cl2 C20 H20B 107.2 . . ?  
Cl3 C20 H20B 107.2 . . ?  
H20A C20 H20B 106.9 . . ?

loop\_

\_geom\_torsion\_atom\_site\_label\_1  
\_geom\_torsion\_atom\_site\_label\_2  
\_geom\_torsion\_atom\_site\_label\_3  
\_geom\_torsion\_atom\_site\_label\_4  
\_geom\_torsion  
\_geom\_torsion\_site\_symmetry\_1  
\_geom\_torsion\_site\_symmetry\_2  
\_geom\_torsion\_site\_symmetry\_3  
\_geom\_torsion\_site\_symmetry\_4  
\_geom\_torsion\_publ\_flag  
C8 C3 C4 C5 -1.0(13) . . . . ?  
Ru1 C3 C4 C5 -176.2(7) . . . . ?  
C3 C4 C5 C6 1.7(14) . . . . ?  
C4 C5 C6 C7 -0.9(14) . . . . ?  
C5 C6 C7 C8 -0.4(14) . . . . ?  
C6 C7 C8 C3 1.1(13) . . . . ?  
C6 C7 C8 C9 -177.1(8) . . . . ?  
C4 C3 C8 C7 -0.3(12) . . . . ?  
Ru1 C3 C8 C7 175.5(6) . . . . ?  
C4 C3 C8 C9 177.9(8) . . . . ?  
Ru1 C3 C8 C9 -6.2(9) . . . . ?  
C7 C8 C9 N1 177.2(8) . . . . ?  
C3 C8 C9 N1 -1.0(10) . . . . ?  
C7 C8 C9 C10 2.4(13) . . . . ?  
C3 C8 C9 C10 -175.8(8) . . . . ?  
N1 C9 C10 C11 -0.7(14) . . . . ?  
C8 C9 C10 C11 173.9(9) . . . . ?  
C9 C10 C11 C12 -2.0(18) . . . . ?  
C9 C10 C11 C14 -179.4(12) . . . . ?  
C10 C11 C12 C13 3(2) . . . . ?  
C14 C11 C12 C13 -179.6(13) . . . . ?  
C10 C11 C12 C17 -157.5(13) . . . . ?  
C14 C11 C12 C17 20(2) . . . . ?  
C10 C11 C12 C17B 163.6(13) . . . . ?  
C14 C11 C12 C17B -19(2) . . . . ?



C11 C12 C13 N1 -1.1(19) . . . . ?  
C17 C12 C13 N1 157.0(14) . . . . ?  
C17B C12 C13 N1 -160.5(13) . . . . ?  
C10 C11 C14 C15 159.0(14) . . . . ?  
C12 C11 C14 C15 -18(2) . . . . ?  
C10 C11 C14 C15B -164.1(13) . . . . ?  
C12 C11 C14 C15B 18.6(19) . . . . ?  
C11 C14 C15 C18 59.4(18) . . . . ?  
C15B C14 C15 C18 -34.3(15) . . . . ?  
C11 C14 C15 C16 -42(2) . . . . ?  
C15B C14 C15 C16 -135(2) . . . . ?  
C18 C15 C16 C17 -25.4(13) . . . . ?  
C14 C15 C16 C17 82.0(16) . . . . ?  
C13 C12 C17 C18 142.9(15) . . . . ?  
C11 C12 C17 C18 -58.1(18) . . . . ?  
C17B C12 C17 C18 44.6(17) . . . . ?  
C13 C12 C17 C16 -119.6(16) . . . . ?  
C11 C12 C17 C16 39(2) . . . . ?  
C17B C12 C17 C16 142(3) . . . . ?  
C15 C16 C17 C12 -80.1(15) . . . . ?  
C15 C16 C17 C18 23.9(13) . . . . ?  
C14 C15 C18 C19 160.3(15) . . . . ?  
C16 C15 C18 C19 -84.0(17) . . . . ?  
C14 C15 C18 C17 -90.2(14) . . . . ?  
C16 C15 C18 C17 25.5(13) . . . . ?  
C12 C17 C18 C15 88.6(15) . . . . ?  
C16 C17 C18 C15 -25.8(13) . . . . ?  
C12 C17 C18 C19 -160.7(15) . . . . ?  
C16 C17 C18 C19 85.0(18) . . . . ?  
C11 C14 C15B C18B -59.9(17) . . . . ?  
C15 C14 C15B C18B 38.2(15) . . . . ?  
C11 C14 C15B C16B 44.0(18) . . . . ?  
C15 C14 C15B C16B 142(2) . . . . ?  
C18B C15B C16B C17B 21.8(13) . . . . ?  
C14 C15B C16B C17B -83.9(14) . . . . ?  
C13 C12 C17B C18B -143.9(14) . . . . ?  
C11 C12 C17B C18B 56.3(18) . . . . ?  
C17 C12 C17B C18B -38.0(16) . . . . ?  
C13 C12 C17B C16B 120.3(15) . . . . ?  
C11 C12 C17B C16B -39.5(19) . . . . ?  
C17 C12 C17B C16B -134(2) . . . . ?  
C15B C16B C17B C12 82.0(15) . . . . ?  
C15B C16B C17B C18B -20.7(13) . . . . ?  
C16B C15B C18B C19B 84.3(17) . . . . ?  
C14 C15B C18B C19B -161.2(14) . . . . ?  
C16B C15B C18B C17B -23.3(14) . . . . ?  
C14 C15B C18B C17B 91.1(14) . . . . ?  
C12 C17B C18B C15B -89.0(14) . . . . ?  
C16B C17B C18B C15B 21.5(14) . . . . ?  
C12 C17B C18B C19B 162.3(15) . . . . ?  
C16B C17B C18B C19B -87.2(16) . . . . ?  
C12 C13 N1 C9 -1.7(15) . . . . ?  
C12 C13 N1 Ru1 178.3(9) . . . . ?  
C10 C9 N1 C13 2.6(12) . . . . ?  
C8 C9 N1 C13 -172.5(8) . . . . ?  
C10 C9 N1 Ru1 -177.4(6) . . . . ?  
C8 C9 N1 Ru1 7.5(9) . . . . ?  
C4 C3 Ru1 C2 -83.7(8) . . . . ?  
C8 C3 Ru1 C2 101.0(6) . . . . ?  
C4 C3 Ru1 C1 4.3(8) . . . . ?  
C8 C3 Ru1 C1 -171.1(6) . . . . ?  
C4 C3 Ru1 N1 -177.0(8) . . . . ?  
C8 C3 Ru1 N1 7.7(6) . . . . ?  
C4 C3 Ru1 Cl1 95.3(8) . . . . ?  
C8 C3 Ru1 Cl1 -80.0(6) . . . . ?  
C4 C3 Ru1 Cl1 136.2(11) . . . 7\_655 ?  
C8 C3 Ru1 Cl1 -39.1(17) . . . 7\_655 ?

C13 N1 Ru1 C2 82.8(8) . . . . ?  
C9 N1 Ru1 C2 -97.1(6) . . . . ?  
C13 N1 Ru1 C3 171.5(8) . . . . ?  
C9 N1 Ru1 C3 -8.5(6) . . . . ?  
C13 N1 Ru1 Cl1 -99.5(7) . . . . ?  
C9 N1 Ru1 Cl1 80.5(6) . . . . ?  
C13 N1 Ru1 Cl1 -16.0(7) . . . 7\_655 ?  
C9 N1 Ru1 Cl1 164.0(5) . . . 7\_655 ?  
Ru1 Cl1 Ru1 C1 -92.2(3) 7\_655 . . . ?  
Ru1 Cl1 Ru1 C3 173.2(2) 7\_655 . . . ?  
Ru1 Cl1 Ru1 N1 93.43(19) 7\_655 . . . ?  
Ru1 Cl1 Ru1 Cl1 0.0 7\_655 . . 7\_655 ?

\_diffn\_measured\_fraction\_theta\_max 0.999  
\_diffn\_reflns\_theta\_full 27.47  
\_diffn\_measured\_fraction\_theta\_full 0.999  
\_refine\_diff\_density\_max 1.803  
\_refine\_diff\_density\_min -1.238  
\_refine\_diff\_density\_rms 0.174

## G. Crystallographic data for 1b, 2a, 2b and 3b

### 1. 1b

#### Crystal data

|                                  |                                           |
|----------------------------------|-------------------------------------------|
| $C_{18}H_{19}N$                  | $D_x = 1.176 \text{ Mg m}^{-3}$           |
| $M_r = 249.34$                   | Melting point: ? K                        |
| Monoclinic, C2                   | Mo $K\alpha$ radiation                    |
| Hall symbol: C 2Y                | $\lambda = 0.71073 \text{ \AA}$           |
| $a = 17.9479 (6) \text{ \AA}$    | Cell parameters from 3291 reflections     |
| $b = 6.2856 (4) \text{ \AA}$     | $\theta = 1.0\text{--}30.0^\circ$         |
| $c = 12.5093 (7) \text{ \AA}$    | $\mu = 0.07 \text{ mm}^{-1}$              |
| $\beta = 93.780 (3)^\circ$       | $T = 173 (2) \text{ K}$                   |
| $V = 1408.15 (13) \text{ \AA}^3$ | Cell measurement pressure: ? kPa          |
| $Z = 4$                          | Block, colorless                          |
| $F_{000} = 536$                  | $0.50 \times 0.50 \times 0.50 \text{ mm}$ |

#### Data collection

|                                                |                                        |
|------------------------------------------------|----------------------------------------|
| KappaCCD diffractometer                        | 2229 independent reflections           |
| Radiation source: fine-focus sealed tube       | 1969 reflections with $I > 2\sigma(I)$ |
| Monochromator: graphite                        | $R_{\text{int}} = 0.061$               |
| Detector resolution: ? pixels $\text{mm}^{-1}$ | $\theta_{\text{max}} = 30.1^\circ$     |
| $T = 173(2) \text{ K}$                         | $\theta_{\text{min}} = 1.6^\circ$      |
| $P = ? \text{ kPa}$                            | $h = -25 \rightarrow 25$               |
| phi and $\omega$ scans                         | $k = -8 \rightarrow 8$                 |
| Absorption correction: none                    | $l = -12 \rightarrow 17$               |
| 5637 measured reflections                      |                                        |

#### Refinement

|                                 |                                                                                     |
|---------------------------------|-------------------------------------------------------------------------------------|
| Refinement on $F^2$             | Hydrogen site location: inferred from neighbouring sites                            |
| Least-squares matrix: full      | H-atom parameters constrained                                                       |
| $R[F^2 > 2\sigma(F^2)] = 0.043$ | $w = 1/[\sigma^2(F_o^2) + (0.0658P)^2 + 0.1745P]$<br>where $P = (F_o^2 + 2F_c^2)/3$ |
| $wR(F^2) = 0.121$               | $(\Delta/\sigma)_{\text{max}} < 0.001$                                              |
| $S = 1.06$                      | $\Delta\rho_{\text{max}} = 0.27 \text{ e \AA}^{-3}$                                 |

|                                                                    |                                                                                                      |
|--------------------------------------------------------------------|------------------------------------------------------------------------------------------------------|
| 2229 reflections                                                   | $\Delta\rho_{\min} = -0.16 \text{ e } \text{\AA}^{-3}$                                               |
| 175 parameters                                                     | Extinction correction: SHELXL,<br>$F_c^* = kF_c [1 + 0.001x F_c^2 \lambda^3 / \sin(2\theta)]^{-1/4}$ |
| 1 restraint                                                        | Extinction coefficient: 0.030 (4)                                                                    |
| ? constraints                                                      | Absolute structure: Flack H D (1983),<br>Acta Cryst. A39, 876-881                                    |
| Primary atom site location: structure-<br>invariant direct methods | Flack parameter: -10 (10)                                                                            |
| Secondary atom site location: difference<br>Fourier map            |                                                                                                      |

Refinement of  $F^2$  against ALL reflections. The weighted R-factor wR and goodness of fit S are based on  $F^2$ , conventional R-factors R are based on F, with F set to zero for negative  $F^2$ . The threshold expression of  $F^2 > 2\sigma(F^2)$  is used only for calculating R-factors(gt) etc. and is not relevant to the choice of reflections for refinement. R-factors based on  $F^2$  are statistically about twice as large as those based on F, and R- factors based on ALL data will be even larger.

Fractional atomic coordinates and isotropic or equivalent isotropic displacement parameters ( $\text{\AA}^2$ )

|     | x            | y          | z            | $U_{\text{iso}}^*/U_{\text{eq}}$ |
|-----|--------------|------------|--------------|----------------------------------|
| C1  | 0.18173 (12) | 0.2801 (4) | 0.82649 (14) | 0.0476 (5)                       |
| H1  | 0.1998       | 0.1418     | 0.8116       | 0.057*                           |
| C2  | 0.18096 (15) | 0.3488 (5) | 0.93206 (16) | 0.0633 (8)                       |
| H2  | 0.1993       | 0.2580     | 0.9885       | 0.076*                           |
| C3  | 0.15389 (12) | 0.5466 (5) | 0.95555 (15) | 0.0529 (6)                       |
| H3  | 0.1519       | 0.5907     | 1.0279       | 0.064*                           |
| C4  | 0.12964 (11) | 0.6803 (4) | 0.87331 (15) | 0.0504 (6)                       |
| H4  | 0.1118       | 0.8185     | 0.8888       | 0.060*                           |
| C5  | 0.13126 (10) | 0.6133 (4) | 0.76733 (14) | 0.0436 (5)                       |
| H5  | 0.1149       | 0.7071     | 0.7110       | 0.052*                           |
| C6  | 0.15644 (8)  | 0.4112 (3) | 0.74291 (12) | 0.0285 (4)                       |
| C7  | 0.15592 (7)  | 0.3318 (3) | 0.63058 (11) | 0.0259 (3)                       |
| C8  | 0.12292 (8)  | 0.4454 (3) | 0.54375 (12) | 0.0270 (3)                       |
| H8  | 0.1011       | 0.5807     | 0.5548       | 0.032*                           |
| C9  | 0.12203 (8)  | 0.3602 (3) | 0.44159 (12) | 0.0258 (3)                       |
| C10 | 0.15498 (7)  | 0.1612 (3) | 0.42772 (11) | 0.0245 (3)                       |
| C11 | 0.18635 (8)  | 0.0596 (3) | 0.51823 (11) | 0.0279 (3)                       |

|      |              |             |              |            |
|------|--------------|-------------|--------------|------------|
| H11  | 0.2087       | -0.0756     | 0.5093       | 0.034*     |
| C12  | 0.08613 (10) | 0.4693 (3)  | 0.34285 (13) | 0.0348 (4) |
| H12A | 0.1087       | 0.6118      | 0.3352       | 0.042*     |
| H12B | 0.0321       | 0.4885      | 0.3514       | 0.042*     |
| C13  | 0.09690 (10) | 0.3387 (3)  | 0.24271 (13) | 0.0364 (4) |
| H13  | 0.0770       | 0.4048      | 0.1739       | 0.044*     |
| C14  | 0.17983 (10) | 0.2651 (4)  | 0.24498 (12) | 0.0389 (4) |
| H14A | 0.1966       | 0.2218      | 0.1744       | 0.047*     |
| H14B | 0.2156       | 0.3648      | 0.2820       | 0.047*     |
| C15  | 0.15569 (7)  | 0.0771 (3)  | 0.31581 (11) | 0.0284 (3) |
| H15  | 0.1817       | -0.0618     | 0.3067       | 0.034*     |
| C16  | 0.07543 (8)  | 0.1002 (3)  | 0.25801 (12) | 0.0316 (4) |
| C17  | 0.00784 (8)  | 0.0487 (4)  | 0.32158 (15) | 0.0384 (4) |
| H17A | -0.0380      | 0.0878      | 0.2793       | 0.058*     |
| H17B | 0.0111       | 0.1292      | 0.3888       | 0.058*     |
| H17C | 0.0071       | -0.1040     | 0.3374       | 0.058*     |
| C18  | 0.06849 (10) | -0.0203 (4) | 0.15160 (14) | 0.0438 (5) |
| H18A | 0.0619       | -0.1724     | 0.1654       | 0.066*     |
| H18B | 0.1139       | 0.0011      | 0.1134       | 0.066*     |
| H18C | 0.0252       | 0.0331      | 0.1078       | 0.066*     |
| N1   | 0.18711 (7)  | 0.1404 (3)  | 0.61778 (10) | 0.0290 (3) |

Atomic displacement parameters (Å<sup>2</sup>)

|    | $U^{11}$       | $U^{22}$       | $U^{33}$   | $U^{12}$    | $U^{13}$    | $U^{23}$        |
|----|----------------|----------------|------------|-------------|-------------|-----------------|
| C1 | 0.0734<br>(13) | 0.0403<br>(12) | 0.0301 (8) | 0.0134 (11) | 0.0097 (8)  | 0.0049 (9)      |
| C2 | 0.1010<br>(19) | 0.0605<br>(18) | 0.0289 (9) | 0.0207 (16) | 0.0093 (10) | 0.0073 (11)     |
| C3 | 0.0633<br>(11) | 0.0639<br>(16) | 0.0326 (8) | 0.0048 (13) | 0.0105 (8)  | -0.0082<br>(11) |
| C4 | 0.0548         | 0.0526         | 0.0435     | 0.0116 (11) | 0.0009 (8)  | -0.0161         |

|     |                |                |                |                |                |             |
|-----|----------------|----------------|----------------|----------------|----------------|-------------|
|     | (11)           | (15)           | (10)           |                |                | (10)        |
| C5  | 0.0467 (9)     | 0.0455<br>(13) | 0.0376 (9)     | 0.0128 (9)     | -0.0048<br>(7) | -0.0071 (9) |
| C6  | 0.0235 (6)     | 0.0339 (9)     | 0.0284 (7)     | -0.0010<br>(6) | 0.0029 (5)     | 0.0005 (7)  |
| C7  | 0.0217 (6)     | 0.0282 (8)     | 0.0280 (6)     | -0.0011<br>(6) | 0.0032 (5)     | 0.0019 (7)  |
| C8  | 0.0270 (6)     | 0.0219 (8)     | 0.0322 (7)     | 0.0021 (6)     | 0.0024 (5)     | 0.0015 (7)  |
| C9  | 0.0254 (6)     | 0.0238 (8)     | 0.0279 (7)     | -0.0026<br>(6) | -0.0004<br>(5) | 0.0031 (6)  |
| C10 | 0.0214 (5)     | 0.0245 (8)     | 0.0278 (6)     | -0.0004<br>(6) | 0.0023 (5)     | 0.0006 (6)  |
| C11 | 0.0251 (6)     | 0.0267 (8)     | 0.0320 (7)     | 0.0037 (6)     | 0.0022 (5)     | 0.0015 (7)  |
| C12 | 0.0458 (8)     | 0.0247 (8)     | 0.0330 (8)     | 0.0029 (7)     | -0.0045<br>(6) | 0.0033 (7)  |
| C13 | 0.0494 (9)     | 0.0296<br>(10) | 0.0292 (7)     | -0.0009<br>(8) | -0.0048<br>(6) | 0.0045 (7)  |
| C14 | 0.0438 (9)     | 0.0442<br>(12) | 0.0289 (7)     | -0.0108<br>(8) | 0.0045 (6)     | 0.0011 (8)  |
| C15 | 0.0257 (6)     | 0.0301 (8)     | 0.0296 (7)     | -0.0004<br>(6) | 0.0025 (5)     | -0.0010 (7) |
| C16 | 0.0314 (7)     | 0.0292 (9)     | 0.0333 (7)     | -0.0005<br>(6) | -0.0039<br>(5) | -0.0016 (7) |
| C17 | 0.0262 (7)     | 0.0324 (9)     | 0.0561<br>(10) | 0.0007 (7)     | -0.0014<br>(6) | -0.0048 (9) |
| C18 | 0.0499<br>(10) | 0.0410<br>(11) | 0.0388 (9)     | -0.0002<br>(9) | -0.0089<br>(7) | -0.0079 (9) |
| N1  | 0.0282 (5)     | 0.0304 (8)     | 0.0284 (6)     | 0.0040 (6)     | 0.0017 (4)     | 0.0024 (6)  |

**Table 1**  
 Geometric parameters (Å, °)

|       |           |          |           |
|-------|-----------|----------|-----------|
| C1—C6 | 1.384 (3) | C11—H11  | 0.9500    |
| C1—C2 | 1.390 (3) | C12—C13  | 1.521 (2) |
| C1—H1 | 0.9500    | C12—H12A | 0.9900    |
| C2—C3 | 1.374 (4) | C12—H12B | 0.9900    |

|          |             |               |             |
|----------|-------------|---------------|-------------|
| C2—H2    | 0.9500      | C13—C14       | 1.557 (3)   |
| C3—C4    | 1.377 (3)   | C13—C16       | 1.563 (3)   |
| C3—H3    | 0.9500      | C13—H13       | 1.0000      |
| C4—C5    | 1.393 (2)   | C14—C15       | 1.556 (3)   |
| C4—H4    | 0.9500      | C14—H14A      | 0.9900      |
| C5—C6    | 1.389 (3)   | C14—H14B      | 0.9900      |
| C5—H5    | 0.9500      | C15—C16       | 1.575 (2)   |
| C6—C7    | 1.491 (2)   | C15—H15       | 1.0000      |
| C7—N1    | 1.341 (2)   | C16—C17       | 1.528 (2)   |
| C7—C8    | 1.398 (2)   | C16—C18       | 1.529 (2)   |
| C8—C9    | 1.385 (2)   | C17—H17A      | 0.9800      |
| C8—H8    | 0.9500      | C17—H17B      | 0.9800      |
| C9—C10   | 1.399 (2)   | C17—H17C      | 0.9800      |
| C9—C12   | 1.519 (2)   | C18—H18A      | 0.9800      |
| C10—C11  | 1.387 (2)   | C18—H18B      | 0.9800      |
| C10—C15  | 1.4974 (19) | C18—H18C      | 0.9800      |
| C11—N1   | 1.3440 (19) |               |             |
| C6—C1—C2 | 120.6 (2)   | H12A—C12—H12B | 108.1       |
| C6—C1—H1 | 119.7       | C12—C13—C14   | 108.58 (14) |
| C2—C1—H1 | 119.7       | C12—C13—C16   | 111.80 (14) |
| C3—C2—C1 | 120.7 (2)   | C14—C13—C16   | 87.48 (14)  |
| C3—C2—H2 | 119.7       | C12—C13—H13   | 115.3       |
| C1—C2—H2 | 119.7       | C14—C13—H13   | 115.3       |
| C2—C3—C4 | 119.45 (19) | C16—C13—H13   | 115.3       |
| C2—C3—H3 | 120.3       | C15—C14—C13   | 86.24 (12)  |
| C4—C3—H3 | 120.3       | C15—C14—H14A  | 114.3       |
| C3—C4—C5 | 120.1 (2)   | C13—C14—H14A  | 114.3       |
| C3—C4—H4 | 120.0       | C15—C14—H14B  | 114.3       |
| C5—C4—H4 | 120.0       | C13—C14—H14B  | 114.3       |
| C6—C5—C4 | 120.9 (2)   | H14A—C14—H14B | 111.4       |

|              |             |                 |              |
|--------------|-------------|-----------------|--------------|
| C6—C5—H5     | 119.6       | C10—C15—C14     | 106.49 (14)  |
| C4—C5—H5     | 119.6       | C10—C15—C16     | 109.43 (11)  |
| C1—C6—C5     | 118.28 (16) | C14—C15—C16     | 87.08 (12)   |
| C1—C6—C7     | 119.59 (16) | C10—C15—H15     | 116.6        |
| C5—C6—C7     | 122.12 (16) | C14—C15—H15     | 116.6        |
| N1—C7—C8     | 121.60 (14) | C16—C15—H15     | 116.6        |
| N1—C7—C6     | 115.87 (14) | C17—C16—C18     | 109.03 (14)  |
| C8—C7—C6     | 122.49 (15) | C17—C16—C13     | 118.52 (15)  |
| C9—C8—C7     | 119.86 (15) | C18—C16—C13     | 112.03 (15)  |
| C9—C8—H8     | 120.1       | C17—C16—C15     | 118.35 (13)  |
| C7—C8—H8     | 120.1       | C18—C16—C15     | 111.92 (13)  |
| C8—C9—C10    | 118.75 (13) | C13—C16—C15     | 85.37 (13)   |
| C8—C9—C12    | 123.66 (15) | C16—C17—H17A    | 109.5        |
| C10—C9—C12   | 117.59 (14) | C16—C17—H17B    | 109.5        |
| C11—C10—C9   | 117.56 (14) | H17A—C17—H17B   | 109.5        |
| C11—C10—C15  | 124.93 (15) | C16—C17—H17C    | 109.5        |
| C9—C10—C15   | 117.48 (13) | H17A—C17—H17C   | 109.5        |
| N1—C11—C10   | 124.16 (16) | H17B—C17—H17C   | 109.5        |
| N1—C11—H11   | 117.9       | C16—C18—H18A    | 109.5        |
| C10—C11—H11  | 117.9       | C16—C18—H18B    | 109.5        |
| C9—C12—C13   | 110.84 (15) | H18A—C18—H18B   | 109.5        |
| C9—C12—H12A  | 109.5       | C16—C18—H18C    | 109.5        |
| C13—C12—H12A | 109.5       | H18A—C18—H18C   | 109.5        |
| C9—C12—H12B  | 109.5       | H18B—C18—H18C   | 109.5        |
| C13—C12—H12B | 109.5       | C7—N1—C11       | 118.07 (13)  |
| C6—C1—C2—C3  | 1.1 (4)     | C9—C12—C13—C16  | 48.91 (19)   |
| C1—C2—C3—C4  | -2.2 (4)    | C12—C13—C14—C15 | 84.34 (15)   |
| C2—C3—C4—C5  | 1.3 (4)     | C16—C13—C14—C15 | -27.82 (12)  |
| C3—C4—C5—C6  | 0.7 (3)     | C11—C10—C15—C14 | -133.29 (16) |
| C2—C1—C6—C5  | 0.8 (3)     | C9—C10—C15—C14  | 44.79 (16)   |



|                |              |                 |              |
|----------------|--------------|-----------------|--------------|
| C2—C1—C6—C7    | -178.37 (19) | C11—C10—C15—C16 | 133.96 (16)  |
| C4—C5—C6—C1    | -1.7 (3)     | C9—C10—C15—C16  | -47.97 (18)  |
| C4—C5—C6—C7    | 177.45 (16)  | C13—C14—C15—C10 | -81.81 (13)  |
| C1—C6—C7—N1    | -5.9 (2)     | C13—C14—C15—C16 | 27.59 (12)   |
| C5—C6—C7—N1    | 175.01 (15)  | C12—C13—C16—C17 | 38.3 (2)     |
| C1—C6—C7—C8    | 172.07 (16)  | C14—C13—C16—C17 | 147.36 (14)  |
| C5—C6—C7—C8    | -7.0 (2)     | C12—C13—C16—C18 | 166.68 (14)  |
| N1—C7—C8—C9    | 0.0 (2)      | C14—C13—C16—C18 | -84.31 (14)  |
| C6—C7—C8—C9    | -177.87 (13) | C12—C13—C16—C15 | -81.53 (14)  |
| C7—C8—C9—C10   | -0.4 (2)     | C14—C13—C16—C15 | 27.48 (11)   |
| C7—C8—C9—C12   | 178.68 (14)  | C10—C15—C16—C17 | -41.1 (2)    |
| C8—C9—C10—C11  | 0.5 (2)      | C14—C15—C16—C17 | -147.55 (16) |
| C12—C9—C10—C11 | -178.67 (14) | C10—C15—C16—C18 | -169.15 (15) |
| C8—C9—C10—C15  | -177.74 (13) | C14—C15—C16—C18 | 84.39 (17)   |
| C12—C9—C10—C15 | 3.11 (19)    | C10—C15—C16—C13 | 78.95 (14)   |
| C9—C10—C11—N1  | -0.1 (2)     | C14—C15—C16—C13 | -27.51 (12)  |
| C15—C10—C11—N1 | 177.98 (13)  | C8—C7—N1—C11    | 0.4 (2)      |
| C8—C9—C12—C13  | 178.09 (14)  | C6—C7—N1—C11    | 178.40 (13)  |
| C10—C9—C12—C13 | -2.8 (2)     | C10—C11—N1—C7   | -0.4 (2)     |
| C9—C12—C13—C14 | -45.9 (2)    |                 |              |

All esds (except the esd in the dihedral angle between two l.s. planes) are estimated using the full covariance matrix. The cell esds are taken into account individually in the estimation of esds in distances, angles and torsion angles; correlations between esds in cell parameters are only used when they are defined by crystal symmetry. An approximate (isotropic) treatment of cell esds is used for estimating esds involving l.s. planes.

## 2. 2a

### *Crystal data*

$C_{36}H_{36}Cl_2N_2O_4Ru_2$

$M_r = 833.71$

Monoclinic,  $P2_1/c$

$D_x = 1.572 \text{ Mg m}^{-3}$

Melting point: ? K

Mo  $K\alpha$  radiation

$\lambda = 0.71073 \text{ \AA}$

|                                |                                           |
|--------------------------------|-------------------------------------------|
| Hall symbol: -P 2ybc           | Cell parameters from 12571 reflections    |
| $a = 10.5024 (4) \text{ \AA}$  | $\theta = 1.0\text{--}27.5^\circ$         |
| $b = 17.3861 (6) \text{ \AA}$  | $\mu = 1.05 \text{ mm}^{-1}$              |
| $c = 19.4045 (6) \text{ \AA}$  | $T = 173 (2) \text{ K}$                   |
| $\beta = 96.247 (2)^\circ$     | Cell measurement pressure: ? kPa          |
| $V = 3522.1 (2) \text{ \AA}^3$ | Prism, colorless                          |
| $Z = 4$                        | $0.20 \times 0.15 \times 0.10 \text{ mm}$ |
| $F_{000} = 1680$               |                                           |

### Data collection

|                                                |                                        |
|------------------------------------------------|----------------------------------------|
| KappaCCD diffractometer                        | 8042 independent reflections           |
| Radiation source: fine-focus sealed tube       | 5452 reflections with $I > 2\sigma(I)$ |
| Monochromator: graphite                        | $R_{\text{int}} = 0.081$               |
| Detector resolution: ? pixels $\text{mm}^{-1}$ | $\theta_{\text{max}} = 27.5^\circ$     |
| $T = 173(2) \text{ K}$                         | $\theta_{\text{min}} = 1.6^\circ$      |
| $P = ? \text{ kPa}$                            | $h = -13 \rightarrow 11$               |
| phi and $\omega$ scans                         | $k = -20 \rightarrow 22$               |
| Absorption correction: none                    | $l = -24 \rightarrow 25$               |
| 22098 measured reflections                     |                                        |

### Refinement

|                                                                |                                                          |
|----------------------------------------------------------------|----------------------------------------------------------|
| Refinement on $F^2$                                            | Secondary atom site location: difference Fourier map     |
| Least-squares matrix: full                                     | Hydrogen site location: inferred from neighbouring sites |
| $R[F^2 > 2\sigma(F^2)] = 0.049$                                | H-atom parameters constrained                            |
| $wR(F^2) = 0.144$                                              | $w = 1/[\sigma^2(F_o^2) + (0.0737P)^2]$                  |
| $S = 1.04$                                                     | where $P = (F_o^2 + 2F_c^2)/3$                           |
| 8042 reflections                                               | $(\Delta/\sigma)_{\text{max}} < 0.001$                   |
| 423 parameters                                                 | $\Delta\rho_{\text{max}} = 1.24 \text{ e \AA}^{-3}$      |
| ? constraints                                                  | $\Delta\rho_{\text{min}} = -1.62 \text{ e \AA}^{-3}$     |
| Primary atom site location: structure-invariant direct methods | Extinction correction: none                              |

Refinement of  $F^2$  against ALL reflections. The weighted R-factor  $wR$  and goodness of fit  $S$  are based on  $F^2$ , conventional R-factors  $R$  are based on  $F$ , with  $F$  set to zero for negative  $F^2$ . The threshold expression of  $F^2 > 2\sigma(F^2)$  is used only for calculating R-factors(gt) etc. and is not relevant to the choice of reflections for refinement. R-factors based on  $F^2$  are statistically about twice as large as those based on  $F$ , and R-factors based on ALL data will be even larger.

Fractional atomic coordinates and isotropic or equivalent isotropic displacement parameters ( $\text{\AA}^2$ )

|      | x           | y            | z           | $U_{\text{iso}}^*/U_{\text{eq}}$ | Occ. (<1) |
|------|-------------|--------------|-------------|----------------------------------|-----------|
| C1   | 0.1393 (5)  | 0.1506 (3)   | 0.1372 (3)  | 0.0328 (12)                      |           |
| C2   | 0.3701 (5)  | 0.1539 (3)   | 0.1084 (3)  | 0.0341 (12)                      |           |
| C3   | 0.3049 (4)  | 0.0177 (3)   | 0.1599 (2)  | 0.0255 (10)                      |           |
| C4   | 0.2172 (5)  | -0.0217 (3)  | 0.1138 (2)  | 0.0288 (11)                      |           |
| H4   | 0.1448      | 0.0049       | 0.0920      | 0.035*                           |           |
| C5   | 0.2331 (5)  | -0.0992 (3)  | 0.0990 (2)  | 0.0316 (12)                      |           |
| C6   | 0.3400 (5)  | -0.1378 (3)  | 0.1296 (3)  | 0.0329 (12)                      |           |
| H6   | 0.3518      | -0.1906      | 0.1193      | 0.039*                           |           |
| C7   | 0.4298 (5)  | -0.1001 (3)  | 0.1750 (2)  | 0.0296 (11)                      |           |
| H7   | 0.5033      | -0.1270      | 0.1952      | 0.036*                           |           |
| C8   | 0.4128 (5)  | -0.0225 (3)  | 0.1913 (2)  | 0.0246 (10)                      |           |
| C9   | 0.1338 (5)  | -0.1400 (3)  | 0.0492 (3)  | 0.0447 (15)                      |           |
| H9A  | 0.0492      | -0.1347      | 0.0656      | 0.067*                           |           |
| H9B  | 0.1558      | -0.1947      | 0.0469      | 0.067*                           |           |
| H9C  | 0.1324      | -0.1171      | 0.0030      | 0.067*                           |           |
| C10  | 0.5027 (4)  | 0.0201 (3)   | 0.2410 (2)  | 0.0250 (10)                      |           |
| C11  | 0.6043 (5)  | -0.0120 (3)  | 0.2835 (2)  | 0.0275 (11)                      |           |
| H11  | 0.6230      | -0.0652      | 0.2794      | 0.033*                           |           |
| C12  | 0.6784 (4)  | 0.0322 (3)   | 0.3317 (2)  | 0.0275 (11)                      |           |
| C13  | 0.6512 (5)  | 0.1106 (3)   | 0.3322 (3)  | 0.0336 (12)                      |           |
| H13  | 0.7021      | 0.1439       | 0.3627      | 0.040*                           |           |
| C14  | 0.5506 (5)  | 0.1398 (3)   | 0.2887 (3)  | 0.0312 (12)                      |           |
| H14  | 0.5343      | 0.1935       | 0.2897      | 0.037*                           |           |
| C15  | 0.7817 (5)  | -0.0025 (3)  | 0.3845 (3)  | 0.0345 (12)                      |           |
| C16  | 0.7997 (17) | -0.0924 (10) | 0.3725 (10) | 0.0595 (18)                      | 0.50      |
| H16A | 0.8073      | -0.1020      | 0.3233      | 0.089*                           | 0.50      |
| H16B | 0.7255      | -0.1202      | 0.3863      | 0.089*                           | 0.50      |
| H16C | 0.8775      | -0.1101      | 0.4004      | 0.089*                           | 0.50      |

|      |             |              |             |             |      |
|------|-------------|--------------|-------------|-------------|------|
| C17  | 0.9129 (14) | 0.0347 (8)   | 0.3757 (7)  | 0.0595 (18) | 0.50 |
| H17A | 0.9772      | 0.0161       | 0.4122      | 0.089*      | 0.50 |
| H17B | 0.9057      | 0.0908       | 0.3790      | 0.089*      | 0.50 |
| H17C | 0.9387      | 0.0209       | 0.3303      | 0.089*      | 0.50 |
| C18  | 0.7451 (14) | 0.0118 (8)   | 0.4560 (7)  | 0.0595 (18) | 0.50 |
| H18A | 0.6584      | -0.0077      | 0.4591      | 0.089*      | 0.50 |
| H18B | 0.7474      | 0.0672       | 0.4655      | 0.089*      | 0.50 |
| H18C | 0.8055      | -0.0147      | 0.4900      | 0.089*      | 0.50 |
| C16B | 0.8358 (16) | -0.0721 (10) | 0.3631 (10) | 0.0595 (18) | 0.50 |
| H16D | 0.8855      | -0.0965      | 0.4030      | 0.089*      | 0.50 |
| H16E | 0.8922      | -0.0612      | 0.3273      | 0.089*      | 0.50 |
| H16F | 0.7672      | -0.1069      | 0.3443      | 0.089*      | 0.50 |
| C17B | 0.8840 (14) | 0.0535 (8)   | 0.4108 (7)  | 0.0595 (18) | 0.50 |
| H17D | 0.9401      | 0.0298       | 0.4486      | 0.089*      | 0.50 |
| H17E | 0.8444      | 0.0997       | 0.4280      | 0.089*      | 0.50 |
| H17F | 0.9345      | 0.0675       | 0.3731      | 0.089*      | 0.50 |
| C18B | 0.7088 (14) | -0.0234 (8)  | 0.4495 (7)  | 0.0595 (18) | 0.50 |
| H18D | 0.6774      | -0.0765      | 0.4451      | 0.089*      | 0.50 |
| H18E | 0.6363      | 0.0116       | 0.4515      | 0.089*      | 0.50 |
| H18F | 0.7677      | -0.0184      | 0.4920      | 0.089*      | 0.50 |
| C19  | 0.3519 (5)  | 0.2211 (3)   | 0.3990 (3)  | 0.0338 (12) |      |
| C20  | 0.1151 (5)  | 0.2138 (3)   | 0.4243 (3)  | 0.0359 (12) |      |
| C21  | 0.1845 (4)  | 0.3504 (3)   | 0.3596 (2)  | 0.0243 (10) |      |
| C22  | 0.2708 (5)  | 0.3978 (3)   | 0.3985 (2)  | 0.0294 (11) |      |
| H22  | 0.3397      | 0.3749       | 0.4271      | 0.035*      |      |
| C23  | 0.2605 (5)  | 0.4777 (3)   | 0.3973 (2)  | 0.0296 (11) |      |
| C24  | 0.1572 (5)  | 0.5102 (3)   | 0.3569 (2)  | 0.0326 (12) |      |
| H24  | 0.1471      | 0.5645       | 0.3566      | 0.039*      |      |
| C25  | 0.0690 (5)  | 0.4657 (3)   | 0.3172 (2)  | 0.0291 (11) |      |
| H25  | -0.0004     | 0.4894       | 0.2897      | 0.035*      |      |

|      |             |            |              |             |
|------|-------------|------------|--------------|-------------|
| C26  | 0.0813 (4)  | 0.3856 (3) | 0.3172 (2)   | 0.0240 (10) |
| C27  | 0.3594 (5)  | 0.5273 (3) | 0.4385 (3)   | 0.0399 (13) |
| H27A | 0.3397      | 0.5816     | 0.4292       | 0.060*      |
| H27B | 0.4445      | 0.5154     | 0.4250       | 0.060*      |
| H27C | 0.3581      | 0.5169     | 0.4881       | 0.060*      |
| C28  | -0.0075 (4) | 0.3350 (3) | 0.2751 (2)   | 0.0237 (10) |
| C29  | -0.1098 (5) | 0.3601 (3) | 0.2281 (2)   | 0.0265 (11) |
| H29  | -0.1252     | 0.4136     | 0.2219       | 0.032*      |
| C30  | -0.1886 (4) | 0.3078 (3) | 0.1905 (2)   | 0.0241 (10) |
| C31  | -0.1654 (5) | 0.2297 (3) | 0.2056 (3)   | 0.0303 (11) |
| H31  | -0.2213     | 0.1916     | 0.1841       | 0.036*      |
| C32  | -0.0633 (5) | 0.2083 (3) | 0.2509 (3)   | 0.0309 (11) |
| H32  | -0.0493     | 0.1550     | 0.2595       | 0.037*      |
| C33  | -0.2933 (5) | 0.3311 (3) | 0.1342 (2)   | 0.0287 (11) |
| C34  | -0.3037 (5) | 0.4184 (3) | 0.1256 (3)   | 0.0386 (13) |
| H34A | -0.3253     | 0.4415     | 0.1688       | 0.058*      |
| H34B | -0.3707     | 0.4306     | 0.0880       | 0.058*      |
| H34C | -0.2216     | 0.4390     | 0.1143       | 0.058*      |
| C35  | -0.4221 (5) | 0.3005 (3) | 0.1518 (3)   | 0.0417 (13) |
| H35A | -0.4176     | 0.2445     | 0.1566       | 0.063*      |
| H35B | -0.4890     | 0.3142     | 0.1146       | 0.063*      |
| H35C | -0.4423     | 0.3234     | 0.1955       | 0.063*      |
| C36  | -0.2629 (6) | 0.2955 (3) | 0.0655 (3)   | 0.0455 (14) |
| H36A | -0.1779     | 0.3124     | 0.0554       | 0.068*      |
| H36B | -0.3273     | 0.3121     | 0.0281       | 0.068*      |
| H36C | -0.2641     | 0.2393     | 0.0692       | 0.068*      |
| N1   | 0.4747 (4)  | 0.0959 (2) | 0.24505 (19) | 0.0242 (8)  |
| N2   | 0.0186 (4)  | 0.2589 (2) | 0.28385 (19) | 0.0249 (9)  |
| O1   | 0.0445 (4)  | 0.1631 (2) | 0.10452 (19) | 0.0463 (10) |
| O2   | 0.4103 (4)  | 0.1660 (2) | 0.05680 (18) | 0.0468 (10) |

|     |              |             |               |              |
|-----|--------------|-------------|---------------|--------------|
| O3  | 0.4470 (4)   | 0.2147 (2)  | 0.4338 (2)    | 0.0516 (11)  |
| O4  | 0.0704 (4)   | 0.2038 (2)  | 0.4737 (2)    | 0.0518 (11)  |
| Cl1 | 0.19787 (11) | 0.09761 (7) | 0.29483 (6)   | 0.0287 (3)   |
| Cl2 | 0.30459 (11) | 0.26371 (6) | 0.24227 (6)   | 0.0279 (3)   |
| Ru1 | 0.29805 (4)  | 0.13088 (2) | 0.188289 (19) | 0.02429 (12) |
| Ru2 | 0.19494 (4)  | 0.23358 (2) | 0.344812 (19) | 0.02500 (13) |

Atomic displacement parameters ( $\text{\AA}^2$ )

|      | $U^{11}$  | $U^{22}$  | $U^{33}$  | $U^{12}$   | $U^{13}$   | $U^{23}$     |
|------|-----------|-----------|-----------|------------|------------|--------------|
| C1   | 0.036 (3) | 0.033 (3) | 0.029 (3) | -0.003 (2) | 0.005 (2)  | -0.001 (2)   |
| C2   | 0.037 (3) | 0.031 (3) | 0.033 (3) | -0.003 (2) | 0.000 (2)  | -0.006 (2)   |
| C3   | 0.027 (3) | 0.024 (3) | 0.026 (2) | -0.005 (2) | 0.005 (2)  | -0.002 (2)   |
| C4   | 0.027 (3) | 0.030 (3) | 0.029 (2) | -0.004 (2) | 0.003 (2)  | -0.007 (2)   |
| C5   | 0.033 (3) | 0.034 (3) | 0.028 (3) | -0.010 (2) | 0.007 (2)  | -0.008 (2)   |
| C6   | 0.041 (3) | 0.022 (3) | 0.037 (3) | -0.004 (2) | 0.010 (2)  | -0.008 (2)   |
| C7   | 0.034 (3) | 0.024 (3) | 0.030 (3) | 0.003 (2)  | 0.000 (2)  | 0.000 (2)    |
| C8   | 0.031 (3) | 0.020 (2) | 0.023 (2) | -0.001 (2) | 0.005 (2)  | -0.0005 (19) |
| C9   | 0.039 (3) | 0.052 (4) | 0.043 (3) | -0.011 (3) | 0.000 (3)  | -0.017 (3)   |
| C10  | 0.026 (3) | 0.025 (3) | 0.025 (2) | 0.001 (2)  | 0.005 (2)  | 0.001 (2)    |
| C11  | 0.031 (3) | 0.026 (3) | 0.026 (2) | 0.005 (2)  | 0.004 (2)  | 0.000 (2)    |
| C12  | 0.026 (3) | 0.030 (3) | 0.026 (2) | 0.000 (2)  | 0.003 (2)  | 0.000 (2)    |
| C13  | 0.030 (3) | 0.032 (3) | 0.037 (3) | -0.001 (2) | -0.002 (2) | -0.011 (2)   |
| C14  | 0.034 (3) | 0.024 (3) | 0.035 (3) | 0.000 (2)  | 0.001 (2)  | -0.004 (2)   |
| C15  | 0.037 (3) | 0.034 (3) | 0.031 (3) | 0.000 (2)  | -0.006 (2) | -0.001 (2)   |
| C16  | 0.057 (5) | 0.060 (5) | 0.056 (3) | 0.003 (3)  | -0.018 (3) | 0.004 (4)    |
| C17  | 0.057 (5) | 0.060 (5) | 0.056 (3) | 0.003 (3)  | -0.018 (3) | 0.004 (4)    |
| C18  | 0.057 (5) | 0.060 (5) | 0.056 (3) | 0.003 (3)  | -0.018 (3) | 0.004 (4)    |
| C16B | 0.057 (5) | 0.060 (5) | 0.056 (3) | 0.003 (3)  | -0.018 (3) | 0.004 (4)    |
| C17B | 0.057 (5) | 0.060 (5) | 0.056 (3) | 0.003 (3)  | -0.018 (3) | 0.004 (4)    |
| C18B | 0.057 (5) | 0.060 (5) | 0.056 (3) | 0.003 (3)  | -0.018 (3) | 0.004 (4)    |

|     |               |               |                |                  |                  |                  |
|-----|---------------|---------------|----------------|------------------|------------------|------------------|
| C19 | 0.043 (3)     | 0.031 (3)     | 0.027 (3)      | 0.008 (2)        | 0.004 (2)        | -0.002 (2)       |
| C20 | 0.041 (3)     | 0.032 (3)     | 0.036 (3)      | 0.009 (2)        | 0.007 (3)        | 0.007 (2)        |
| C21 | 0.031 (3)     | 0.021 (2)     | 0.022 (2)      | 0.004 (2)        | 0.006 (2)        | 0.000 (2)        |
| C22 | 0.030 (3)     | 0.031 (3)     | 0.027 (2)      | 0.006 (2)        | 0.000 (2)        | -0.001 (2)       |
| C23 | 0.031 (3)     | 0.029 (3)     | 0.029 (3)      | 0.001 (2)        | 0.003 (2)        | -0.006 (2)       |
| C24 | 0.039 (3)     | 0.025 (3)     | 0.033 (3)      | -0.002 (2)       | 0.000 (2)        | -0.004 (2)       |
| C25 | 0.033 (3)     | 0.025 (3)     | 0.029 (3)      | 0.005 (2)        | -0.001 (2)       | 0.003 (2)        |
| C26 | 0.027 (3)     | 0.024 (3)     | 0.020 (2)      | 0.002 (2)        | 0.002 (2)        | 0.003 (2)        |
| C27 | 0.033 (3)     | 0.045 (3)     | 0.039 (3)      | 0.001 (2)        | -0.006 (2)       | -0.010 (3)       |
| C28 | 0.026 (3)     | 0.023 (2)     | 0.023 (2)      | -0.001 (2)       | 0.0060 (19)      | -0.001 (2)       |
| C29 | 0.030 (3)     | 0.022 (2)     | 0.027 (2)      | 0.001 (2)        | 0.003 (2)        | 0.004 (2)        |
| C30 | 0.026 (3)     | 0.022 (2)     | 0.025 (2)      | 0.003 (2)        | 0.005 (2)        | -0.001 (2)       |
| C31 | 0.028 (3)     | 0.023 (3)     | 0.038 (3)      | -0.002 (2)       | 0.000 (2)        | -0.003 (2)       |
| C32 | 0.030 (3)     | 0.020 (2)     | 0.042 (3)      | 0.001 (2)        | -0.001 (2)       | 0.004 (2)        |
| C33 | 0.031 (3)     | 0.029 (3)     | 0.024 (2)      | 0.002 (2)        | -0.001 (2)       | -0.003 (2)       |
| C34 | 0.040 (3)     | 0.030 (3)     | 0.042 (3)      | 0.003 (2)        | -0.010 (3)       | 0.003 (2)        |
| C35 | 0.027 (3)     | 0.047 (3)     | 0.051 (3)      | -0.003 (2)       | 0.000 (3)        | -0.001 (3)       |
| C36 | 0.056 (4)     | 0.047 (3)     | 0.032 (3)      | 0.006 (3)        | 0.001 (3)        | -0.010 (3)       |
| N1  | 0.022 (2)     | 0.026 (2)     | 0.0247<br>(19) | 0.0006 (17)      | 0.0009 (17)      | -0.0030 (18)     |
| N2  | 0.026 (2)     | 0.021 (2)     | 0.027 (2)      | 0.0008 (17)      | 0.0005 (18)      | 0.0007 (17)      |
| O1  | 0.035 (2)     | 0.058 (3)     | 0.043 (2)      | 0.0029 (19)      | -0.0105 (19)     | 0.003 (2)        |
| O2  | 0.060 (3)     | 0.053 (2)     | 0.029 (2)      | -0.009 (2)       | 0.0092 (19)      | -0.0002 (19)     |
| O3  | 0.044 (3)     | 0.065 (3)     | 0.042 (2)      | 0.019 (2)        | -0.013 (2)       | -0.007 (2)       |
| O4  | 0.061 (3)     | 0.054 (2)     | 0.045 (2)      | 0.009 (2)        | 0.022 (2)        | 0.012 (2)        |
| Cl1 | 0.0318<br>(7) | 0.0208<br>(6) | 0.0338 (6)     | 0.0021 (5)       | 0.0046 (5)       | 0.0039 (5)       |
| Cl2 | 0.0316<br>(7) | 0.0219<br>(6) | 0.0304 (6)     | -0.0011 (5)      | 0.0050 (5)       | -0.0002 (5)      |
| Ru1 | 0.0253<br>(2) | 0.0222<br>(2) | 0.0247 (2)     | -0.00032<br>(16) | -0.00027<br>(16) | -0.00046<br>(16) |
| Ru2 | 0.0269        | 0.0232        | 0.0243 (2)     | 0.00409 (16)     | 0.00031 (16)     | 0.00252 (16)     |

(2) (2)

**Table 2**  
Geometric parameters (Å, °)

|         |           |           |           |
|---------|-----------|-----------|-----------|
| C1—O1   | 1.142 (6) | C18B—H18D | 0.9800    |
| C1—Ru1  | 1.876 (5) | C18B—H18E | 0.9800    |
| C2—O2   | 1.149 (6) | C18B—H18F | 0.9800    |
| C2—Ru1  | 1.841 (6) | C19—O3    | 1.148 (6) |
| C3—C4   | 1.392 (6) | C19—Ru2   | 1.869 (6) |
| C3—C8   | 1.412 (6) | C20—O4    | 1.126 (6) |
| C3—Ru1  | 2.046 (5) | C20—Ru2   | 1.866 (6) |
| C4—C5   | 1.391 (7) | C21—C22   | 1.386 (6) |
| C4—H4   | 0.9500    | C21—C26   | 1.425 (6) |
| C5—C6   | 1.385 (7) | C21—Ru2   | 2.056 (4) |
| C5—C9   | 1.519 (6) | C22—C23   | 1.393 (6) |
| C6—C7   | 1.383 (6) | C22—H22   | 0.9500    |
| C6—H6   | 0.9500    | C23—C24   | 1.387 (6) |
| C7—C8   | 1.402 (6) | C23—C27   | 1.510 (6) |
| C7—H7   | 0.9500    | C24—C25   | 1.377 (6) |
| C8—C10  | 1.473 (6) | C24—H24   | 0.9500    |
| C9—H9A  | 0.9800    | C25—C26   | 1.397 (6) |
| C9—H9B  | 0.9800    | C25—H25   | 0.9500    |
| C9—H9C  | 0.9800    | C26—C28   | 1.466 (6) |
| C10—N1  | 1.354 (6) | C27—H27A  | 0.9800    |
| C10—C11 | 1.393 (6) | C27—H27B  | 0.9800    |
| C11—C12 | 1.383 (6) | C27—H27C  | 0.9800    |
| C11—H11 | 0.9500    | C28—N2    | 1.357 (6) |
| C12—C13 | 1.392 (7) | C28—C29   | 1.402 (6) |
| C12—C15 | 1.533 (6) | C29—C30   | 1.382 (6) |
| C13—C14 | 1.376 (7) | C29—H29   | 0.9500    |



|           |            |             |             |
|-----------|------------|-------------|-------------|
| C13—H13   | 0.9500     | C30—C31     | 1.404 (6)   |
| C14—N1    | 1.337 (6)  | C30—C33     | 1.518 (6)   |
| C14—H14   | 0.9500     | C31—C32     | 1.363 (7)   |
| C15—C16B  | 1.42 (2)   | C31—H31     | 0.9500      |
| C15—C17B  | 1.498 (15) | C32—N2      | 1.343 (6)   |
| C15—C18   | 1.500 (15) | C32—H32     | 0.9500      |
| C15—C17   | 1.548 (16) | C33—C35     | 1.526 (7)   |
| C15—C18B  | 1.588 (17) | C33—C34     | 1.530 (7)   |
| C15—C16   | 1.593 (19) | C33—C36     | 1.534 (7)   |
| C16—H16A  | 0.9800     | C34—H34A    | 0.9800      |
| C16—H16B  | 0.9800     | C34—H34B    | 0.9800      |
| C16—H16C  | 0.9800     | C34—H34C    | 0.9800      |
| C17—H17A  | 0.9800     | C35—H35A    | 0.9800      |
| C17—H17B  | 0.9800     | C35—H35B    | 0.9800      |
| C17—H17C  | 0.9800     | C35—H35C    | 0.9800      |
| C18—H18A  | 0.9800     | C36—H36A    | 0.9800      |
| C18—H18B  | 0.9800     | C36—H36B    | 0.9800      |
| C18—H18C  | 0.9800     | C36—H36C    | 0.9800      |
| C16B—H16D | 0.9800     | N1—Ru1      | 2.141 (4)   |
| C16B—H16E | 0.9800     | N2—Ru2      | 2.132 (4)   |
| C16B—H16F | 0.9800     | Cl1—Ru1     | 2.4878 (12) |
| C17B—H17D | 0.9800     | Cl1—Ru2     | 2.5565 (12) |
| C17B—H17E | 0.9800     | Cl2—Ru2     | 2.4614 (12) |
| C17B—H17F | 0.9800     | Cl2—Ru1     | 2.5338 (12) |
| O1—C1—Ru1 | 178.0 (5)  | C24—C23—C27 | 121.1 (4)   |
| O2—C2—Ru1 | 176.6 (5)  | C22—C23—C27 | 120.8 (4)   |
| C4—C3—C8  | 118.4 (4)  | C25—C24—C23 | 121.6 (5)   |
| C4—C3—Ru1 | 127.3 (4)  | C25—C24—H24 | 119.2       |
| C8—C3—Ru1 | 114.2 (3)  | C23—C24—H24 | 119.2       |
| C5—C4—C3  | 121.6 (5)  | C24—C25—C26 | 120.2 (4)   |

|             |           |               |           |
|-------------|-----------|---------------|-----------|
| C5—C4—H4    | 119.2     | C24—C25—H25   | 119.9     |
| C3—C4—H4    | 119.2     | C26—C25—H25   | 119.9     |
| C6—C5—C4    | 119.4 (4) | C25—C26—C21   | 119.5 (4) |
| C6—C5—C9    | 121.0 (5) | C25—C26—C28   | 123.0 (4) |
| C4—C5—C9    | 119.7 (5) | C21—C26—C28   | 117.5 (4) |
| C7—C6—C5    | 120.6 (4) | C23—C27—H27A  | 109.5     |
| C7—C6—H6    | 119.7     | C23—C27—H27B  | 109.5     |
| C5—C6—H6    | 119.7     | H27A—C27—H27B | 109.5     |
| C6—C7—C8    | 120.3 (5) | C23—C27—H27C  | 109.5     |
| C6—C7—H7    | 119.8     | H27A—C27—H27C | 109.5     |
| C8—C7—H7    | 119.8     | H27B—C27—H27C | 109.5     |
| C7—C8—C3    | 119.7 (4) | N2—C28—C29    | 121.0 (4) |
| C7—C8—C10   | 122.9 (4) | N2—C28—C26    | 114.0 (4) |
| C3—C8—C10   | 117.4 (4) | C29—C28—C26   | 124.9 (4) |
| C5—C9—H9A   | 109.5     | C30—C29—C28   | 120.7 (4) |
| C5—C9—H9B   | 109.5     | C30—C29—H29   | 119.7     |
| H9A—C9—H9B  | 109.5     | C28—C29—H29   | 119.7     |
| C5—C9—H9C   | 109.5     | C29—C30—C31   | 116.5 (4) |
| H9A—C9—H9C  | 109.5     | C29—C30—C33   | 123.3 (4) |
| H9B—C9—H9C  | 109.5     | C31—C30—C33   | 120.2 (4) |
| N1—C10—C11  | 120.8 (4) | C32—C31—C30   | 120.3 (4) |
| N1—C10—C8   | 113.6 (4) | C32—C31—H31   | 119.8     |
| C11—C10—C8  | 125.6 (4) | C30—C31—H31   | 119.8     |
| C12—C11—C10 | 121.0 (4) | N2—C32—C31    | 123.1 (4) |
| C12—C11—H11 | 119.5     | N2—C32—H32    | 118.4     |
| C10—C11—H11 | 119.5     | C31—C32—H32   | 118.4     |
| C11—C12—C13 | 116.7 (4) | C30—C33—C35   | 109.6 (4) |
| C11—C12—C15 | 122.5 (4) | C30—C33—C34   | 112.4 (4) |
| C13—C12—C15 | 120.8 (4) | C35—C33—C34   | 108.4 (4) |
| C14—C13—C12 | 120.0 (4) | C30—C33—C36   | 108.3 (4) |

|               |            |               |           |
|---------------|------------|---------------|-----------|
| C14—C13—H13   | 120.0      | C35—C33—C36   | 109.1 (4) |
| C12—C13—H13   | 120.0      | C34—C33—C36   | 108.9 (4) |
| N1—C14—C13    | 122.9 (4)  | C33—C34—H34A  | 109.5     |
| N1—C14—H14    | 118.6      | C33—C34—H34B  | 109.5     |
| C13—C14—H14   | 118.6      | H34A—C34—H34B | 109.5     |
| C16B—C15—C17B | 111.0 (9)  | C33—C34—H34C  | 109.5     |
| C16B—C15—C18  | 124.3 (10) | H34A—C34—H34C | 109.5     |
| C17B—C15—C18  | 79.8 (8)   | H34B—C34—H34C | 109.5     |
| C16B—C15—C12  | 114.7 (8)  | C33—C35—H35A  | 109.5     |
| C17B—C15—C12  | 113.7 (6)  | C33—C35—H35B  | 109.5     |
| C18—C15—C12   | 108.5 (7)  | H35A—C35—H35B | 109.5     |
| C16B—C15—C17  | 86.3 (9)   | C33—C35—H35C  | 109.5     |
| C18—C15—C17   | 110.7 (8)  | H35A—C35—H35C | 109.5     |
| C12—C15—C17   | 109.6 (6)  | H35B—C35—H35C | 109.5     |
| C16B—C15—C18B | 106.2 (9)  | C33—C36—H36A  | 109.5     |
| C17B—C15—C18B | 105.5 (8)  | C33—C36—H36B  | 109.5     |
| C12—C15—C18B  | 104.7 (6)  | H36A—C36—H36B | 109.5     |
| C17—C15—C18B  | 134.0 (8)  | C33—C36—H36C  | 109.5     |
| C17B—C15—C16  | 126.5 (9)  | H36A—C36—H36C | 109.5     |
| C18—C15—C16   | 110.1 (9)  | H36B—C36—H36C | 109.5     |
| C12—C15—C16   | 112.0 (7)  | C14—N1—C10    | 118.4 (4) |
| C17—C15—C16   | 105.8 (9)  | C14—N1—Ru1    | 125.9 (3) |
| C18B—C15—C16  | 88.1 (9)   | C10—N1—Ru1    | 115.3 (3) |
| C15—C16—H16A  | 109.5      | C32—N2—C28    | 117.9 (4) |
| C15—C16—H16B  | 109.5      | C32—N2—Ru2    | 127.0 (3) |
| C15—C16—H16C  | 109.5      | C28—N2—Ru2    | 115.0 (3) |
| C15—C17—H17A  | 109.5      | Ru1—Cl1—Ru2   | 97.12 (4) |
| C15—C17—H17B  | 109.5      | Ru2—Cl2—Ru1   | 98.40 (4) |
| C15—C17—H17C  | 109.5      | C2—Ru1—C1     | 86.5 (2)  |
| C15—C18—H18A  | 109.5      | C2—Ru1—C3     | 87.3 (2)  |

|                |           |                 |             |
|----------------|-----------|-----------------|-------------|
| C15—C18—H18B   | 109.5     | C1—Ru1—C3       | 95.1 (2)    |
| C15—C18—H18C   | 109.5     | C2—Ru1—N1       | 94.71 (19)  |
| C15—C16B—H16D  | 109.5     | C1—Ru1—N1       | 174.04 (18) |
| C15—C16B—H16E  | 109.5     | C3—Ru1—N1       | 79.12 (16)  |
| H16D—C16B—H16E | 109.5     | C2—Ru1—Cl1      | 178.77 (16) |
| C15—C16B—H16F  | 109.5     | C1—Ru1—Cl1      | 92.84 (16)  |
| H16D—C16B—H16F | 109.5     | C3—Ru1—Cl1      | 91.76 (13)  |
| H16E—C16B—H16F | 109.5     | N1—Ru1—Cl1      | 85.85 (11)  |
| C15—C17B—H17D  | 109.5     | C2—Ru1—Cl2      | 98.91 (16)  |
| C15—C17B—H17E  | 109.5     | C1—Ru1—Cl2      | 91.94 (16)  |
| H17D—C17B—H17E | 109.5     | C3—Ru1—Cl2      | 170.89 (13) |
| C15—C17B—H17F  | 109.5     | N1—Ru1—Cl2      | 93.64 (10)  |
| H17D—C17B—H17F | 109.5     | Cl1—Ru1—Cl2     | 82.14 (4)   |
| H17E—C17B—H17F | 109.5     | C20—Ru2—C19     | 87.8 (2)    |
| C15—C18B—H18D  | 109.5     | C20—Ru2—C21     | 91.8 (2)    |
| C15—C18B—H18E  | 109.5     | C19—Ru2—C21     | 95.3 (2)    |
| H18D—C18B—H18E | 109.5     | C20—Ru2—N2      | 93.16 (19)  |
| C15—C18B—H18F  | 109.5     | C19—Ru2—N2      | 174.72 (18) |
| H18D—C18B—H18F | 109.5     | C21—Ru2—N2      | 79.44 (16)  |
| H18E—C18B—H18F | 109.5     | C20—Ru2—Cl2     | 177.83 (17) |
| O3—C19—Ru2     | 178.0 (5) | C19—Ru2—Cl2     | 91.03 (16)  |
| O4—C20—Ru2     | 177.2 (5) | C21—Ru2—Cl2     | 86.51 (13)  |
| C22—C21—C26    | 118.0 (4) | N2—Ru2—Cl2      | 87.83 (11)  |
| C22—C21—Ru2    | 128.4 (3) | C20—Ru2—Cl1     | 99.71 (16)  |
| C26—C21—Ru2    | 113.1 (3) | C19—Ru2—Cl1     | 93.45 (15)  |
| C21—C22—C23    | 122.5 (4) | C21—Ru2—Cl1     | 165.79 (13) |
| C21—C22—H22    | 118.7     | N2—Ru2—Cl1      | 91.50 (10)  |
| C23—C22—H22    | 118.7     | Cl2—Ru2—Cl1     | 82.19 (4)   |
| C24—C23—C22    | 118.0 (4) |                 |             |
| C8—C3—C4—C5    | 0.7 (7)   | C31—C30—C33—C36 | -59.6 (6)   |

|                      |            |                |            |
|----------------------|------------|----------------|------------|
| Ru1—C3—C4—C5         | -179.9 (4) | C13—C14—N1—C10 | -3.7 (7)   |
| C3—C4—C5—C6          | -1.4 (7)   | C13—C14—N1—Ru1 | 168.7 (4)  |
| C3—C4—C5—C9          | 179.1 (4)  | C11—C10—N1—C14 | 3.0 (7)    |
| C4—C5—C6—C7          | 0.6 (8)    | C8—C10—N1—C14  | -180.0 (4) |
| C9—C5—C6—C7          | -179.9 (4) | C11—C10—N1—Ru1 | -170.2 (3) |
| C5—C6—C7—C8          | 0.8 (8)    | C8—C10—N1—Ru1  | 6.8 (5)    |
| C6—C7—C8—C3          | -1.4 (7)   | C31—C32—N2—C28 | 4.8 (7)    |
| C6—C7—C8—C10         | 177.9 (4)  | C31—C32—N2—Ru2 | -171.1 (4) |
| C4—C3—C8—C7          | 0.7 (7)    | C29—C28—N2—C32 | -5.9 (7)   |
| Ru1—C3—C8—C7         | -178.8 (4) | C26—C28—N2—C32 | 175.5 (4)  |
| C4—C3—C8—C10         | -178.7 (4) | C29—C28—N2—Ru2 | 170.4 (3)  |
| Ru1—C3—C8—C10        | 1.9 (5)    | C26—C28—N2—Ru2 | -8.2 (5)   |
| C7—C8—C10—N1         | 174.9 (4)  | C4—C3—Ru1—C2   | -82.7 (4)  |
| C3—C8—C10—N1         | -5.8 (6)   | C8—C3—Ru1—C2   | 96.7 (4)   |
| C7—C8—C10—C11        | -8.3 (7)   | C4—C3—Ru1—C1   | 3.5 (4)    |
| C3—C8—C10—C11        | 171.1 (4)  | C8—C3—Ru1—C1   | -177.1 (4) |
| N1—C10—C11—C12       | 0.8 (7)    | C4—C3—Ru1—N1   | -178.1 (4) |
| C8—C10—C11—C12       | -175.8 (4) | C8—C3—Ru1—N1   | 1.3 (3)    |
| C10—C11—C12—C13      | -3.8 (7)   | C4—C3—Ru1—Cl1  | 96.5 (4)   |
| C10—C11—C12—C15      | 173.5 (4)  | C8—C3—Ru1—Cl1  | -84.1 (3)  |
| C11—C12—C13—C14      | 3.2 (7)    | C14—N1—Ru1—C2  | 96.4 (4)   |
| C15—C12—C13—C14      | -174.2 (5) | C10—N1—Ru1—C2  | -91.0 (3)  |
| C12—C13—C14—N1       | 0.6 (8)    | C14—N1—Ru1—C3  | -177.3 (4) |
| C11—C12—C15—<br>C16B | 26.8 (10)  | C10—N1—Ru1—C3  | -4.7 (3)   |
| C13—C12—C15—<br>C16B | -155.9 (8) | C14—N1—Ru1—Cl1 | -84.7 (4)  |
| C11—C12—C15—<br>C17B | 156.1 (8)  | C10—N1—Ru1—Cl1 | 87.9 (3)   |
| C13—C12—C15—<br>C17B | -26.6 (9)  | C14—N1—Ru1—Cl2 | -2.9 (4)   |
| C11—C12—C15—C18      | -117.1 (7) | C10—N1—Ru1—Cl2 | 169.8 (3)  |

|                      |            |                 |              |
|----------------------|------------|-----------------|--------------|
| C13—C12—C15—C18      | 60.1 (8)   | Ru2—Cl1—Ru1—C1  | -88.73 (16)  |
| C11—C12—C15—C17      | 121.9 (7)  | Ru2—Cl1—Ru1—C3  | 176.05 (13)  |
| C13—C12—C15—C17      | -60.9 (8)  | Ru2—Cl1—Ru1—N1  | 97.10 (11)   |
| C11—C12—C15—<br>C18B | -89.2 (7)  | Ru2—Cl1—Ru1—Cl2 | 2.84 (4)     |
| C13—C12—C15—<br>C18B | 88.0 (7)   | Ru2—Cl2—Ru1—C2  | 176.39 (16)  |
| C11—C12—C15—C16      | 4.7 (9)    | Ru2—Cl2—Ru1—C1  | 89.65 (16)   |
| C13—C12—C15—C16      | -178.0 (8) | Ru2—Cl2—Ru1—N1  | -88.25 (11)  |
| C26—C21—C22—C23      | -0.3 (7)   | Ru2—Cl2—Ru1—Cl1 | -2.96 (4)    |
| Ru2—C21—C22—C23      | 171.7 (4)  | C22—C21—Ru2—C20 | 87.5 (5)     |
| C21—C22—C23—C24      | 1.9 (8)    | C26—C21—Ru2—C20 | -100.1 (4)   |
| C21—C22—C23—C27      | -177.8 (5) | C22—C21—Ru2—C19 | -0.4 (5)     |
| C22—C23—C24—C25      | -2.1 (8)   | C26—C21—Ru2—C19 | 171.9 (4)    |
| C27—C23—C24—C25      | 177.7 (5)  | C22—C21—Ru2—N2  | -179.6 (5)   |
| C23—C24—C25—C26      | 0.6 (8)    | C26—C21—Ru2—N2  | -7.2 (3)     |
| C24—C25—C26—C21      | 1.1 (7)    | C22—C21—Ru2—Cl2 | -91.1 (4)    |
| C24—C25—C26—C28      | -178.7 (4) | C26—C21—Ru2—Cl2 | 81.2 (3)     |
| C22—C21—C26—C25      | -1.2 (7)   | C22—C21—Ru2—Cl1 | -128.5 (5)   |
| Ru2—C21—C26—C25      | -174.4 (4) | C26—C21—Ru2—Cl1 | 43.9 (8)     |
| C22—C21—C26—C28      | 178.6 (4)  | C32—N2—Ru2—C20  | -84.1 (4)    |
| Ru2—C21—C26—C28      | 5.4 (5)    | C28—N2—Ru2—C20  | 99.9 (3)     |
| C25—C26—C28—N2       | -178.2 (4) | C32—N2—Ru2—C21  | -175.3 (4)   |
| C21—C26—C28—N2       | 2.0 (6)    | C28—N2—Ru2—C21  | 8.7 (3)      |
| C25—C26—C28—C29      | 3.2 (7)    | C32—N2—Ru2—Cl2  | 97.8 (4)     |
| C21—C26—C28—C29      | -176.5 (4) | C28—N2—Ru2—Cl2  | -78.1 (3)    |
| N2—C28—C29—C30       | 1.5 (7)    | C32—N2—Ru2—Cl1  | 15.7 (4)     |
| C26—C28—C29—C30      | 179.9 (4)  | C28—N2—Ru2—Cl1  | -160.2 (3)   |
| C28—C29—C30—C31      | 4.1 (7)    | Ru1—Cl2—Ru2—C19 | 96.22 (15)   |
| C28—C29—C30—C33      | -174.3 (4) | Ru1—Cl2—Ru2—C21 | -168.49 (13) |
| C29—C30—C31—C32      | -5.3 (7)   | Ru1—Cl2—Ru2—N2  | -88.94 (10)  |

|                 |            |                 |             |
|-----------------|------------|-----------------|-------------|
| C33—C30—C31—C32 | 173.2 (5)  | Ru1—Cl2—Ru2—Cl1 | 2.88 (4)    |
| C30—C31—C32—N2  | 0.9 (8)    | Ru1—Cl1—Ru2—C20 | 178.14 (17) |
| C29—C30—C33—C35 | -122.3 (5) | Ru1—Cl1—Ru2—C19 | -93.49 (16) |
| C31—C30—C33—C35 | 59.4 (6)   | Ru1—Cl1—Ru2—C21 | 34.7 (6)    |
| C29—C30—C33—C34 | -1.6 (6)   | Ru1—Cl1—Ru2—N2  | 84.68 (11)  |
| C31—C30—C33—C34 | -180.0 (4) | Ru1—Cl1—Ru2—Cl2 | -2.92 (4)   |
| C29—C30—C33—C36 | 118.7 (5)  |                 |             |

All esds (except the esd in the dihedral angle between two l.s. planes) are estimated using the full covariance matrix. The cell esds are taken into account individually in the estimation of esds in distances, angles and torsion angles; correlations between esds in cell parameters are only used when they are defined by crystal symmetry. An approximate (isotropic) treatment of cell esds is used for estimating esds involving l.s. planes.

### 3. 2b

#### Crystal data

C<sub>40</sub>H<sub>36</sub>Cl<sub>2</sub>N<sub>2</sub>O<sub>4</sub>Ru<sub>2</sub>?

$M_r = 966.67$

Orthorhombic,  $P2_12_12_1$

Hall symbol: ?

$a = 10.845 (1) \text{ \AA}$

$b = 15.601 (1) \text{ \AA}$

$c = 27.808 (1) \text{ \AA}$

$V = 4704.9 (6) \text{ \AA}^3$

$Z = 4$

$F_{000} = 1944$

$D_x = 1.365 \text{ Mg m}^{-3}$

Melting point: ? K

Mo  $K\alpha$  radiation

$\lambda = 0.71069 \text{ \AA}$

Cell parameters from 9172 reflections

$\theta = 1.0\text{--}30.0^\circ$

$\mu = 0.91 \text{ mm}^{-1}$

$T = 150.0 (1) \text{ K}$

Cell measurement pressure: ? kPa

Needle, colorless

$0.40 \times 0.10 \times 0.10 \text{ mm}$

#### Data collection

KappaCCD  
diffractometer

40814 measured reflections

Radiation source: fine-focus sealed tube 13705 independent reflections

Monochromator: graphite

11962 reflections with  $I > 2\sigma(I)$

Detector resolution: ? pixels  $\text{mm}^{-1}$

$R_{\text{int}} = 0.037$

$T = 150.0(1) \text{ K}$

$\theta_{\text{max}} = 30.0^\circ$

$P = ? \text{ kPa}$

$\theta_{\text{min}} = 2.7^\circ$

phi and  $\omega$  scans

$h = -15 \rightarrow 14$

Absorption correction: multi-scan  
 ?  $k = -21 \rightarrow 17$   
 $T_{\min} = 0.713, T_{\max} = 0.915$   $l = -38 \rightarrow 38$

### Refinement

|                                                                |                                                                |
|----------------------------------------------------------------|----------------------------------------------------------------|
| Refinement on $F^2$                                            | Hydrogen site location: inferred from neighbouring sites       |
| Least-squares matrix: full                                     | H-atom parameters constrained                                  |
| $R[F^2 > 2\sigma(F^2)] = 0.034$                                | $w = 1/[\sigma^2(F_o^2) + (0.0547P)^2]$                        |
| $wR(F^2) = 0.093$                                              | where $P = (F_o^2 + 2F_c^2)/3$                                 |
| $S = 1.02$                                                     | $(\Delta/\sigma)_{\max} = 0.002$                               |
| 13705 reflections                                              | $\Delta\rho_{\max} = 0.44 \text{ e } \text{\AA}^{-3}$          |
| 455 parameters                                                 | $\Delta\rho_{\min} = -0.66 \text{ e } \text{\AA}^{-3}$         |
| ? constraints                                                  | Extinction correction: none                                    |
| Primary atom site location: structure-invariant direct methods | Absolute structure: Flack H D (1983), Acta Cryst. A39, 876-881 |
| Secondary atom site location: difference Fourier map           | Flack parameter: $-0.02 (2)$                                   |

Refinement of  $F^2$  against ALL reflections. The weighted R-factor wR and goodness of fit S are based on  $F^2$ , conventional R-factors R are based on F, with F set to zero for negative  $F^2$ . The threshold expression of  $F^2 > 2\sigma(F^2)$  is used only for calculating R-factors(gt) etc. and is not relevant to the choice of reflections for refinement. R-factors based on  $F^2$  are statistically about twice as large as those based on F, and R-factors based on ALL data will be even larger.

One highly disordered CH<sub>2</sub>Cl<sub>2</sub> molecule was accounted for using the Platon SQUEEZE function.

Fractional atomic coordinates and isotropic or equivalent isotropic displacement parameters ( $\text{\AA}^2$ )

|     | x           | y             | z            | $U_{\text{iso}}^*/U_{\text{eq}}$ |
|-----|-------------|---------------|--------------|----------------------------------|
| Ru1 | 0.27323 (2) | 1.024432 (14) | 0.234902 (7) | 0.02440 (5)                      |
| Ru2 | 0.09936 (2) | 0.936973 (15) | 0.130672 (8) | 0.02801 (6)                      |
| Cl2 | 0.17994 (7) | 0.88221 (4)   | 0.21066 (2)  | 0.02872 (14)                     |
| Cl1 | 0.18744 (7) | 1.07401 (5)   | 0.15800 (2)  | 0.03358 (15)                     |
| O1  | -0.1483 (2) | 0.99042 (17)  | 0.17069 (9)  | 0.0477 (6)                       |
| O2  | 0.0003 (2)  | 0.77386 (16)  | 0.08983 (8)  | 0.0433 (6)                       |
| O3  | 0.5161 (2)  | 0.99773 (17)  | 0.18407 (8)  | 0.0413 (6)                       |



|      |             |              |               |             |
|------|-------------|--------------|---------------|-------------|
| O4   | 0.3692 (2)  | 0.96862 (19) | 0.33088 (8)   | 0.0495 (6)  |
| N1   | 0.2705 (2)  | 0.90979 (16) | 0.09660 (7)   | 0.0282 (5)  |
| N2   | 0.1048 (2)  | 1.06248 (15) | 0.26755 (8)   | 0.0268 (4)  |
| C1   | 0.0722 (3)  | 0.9942 (2)   | 0.06525 (11)  | 0.0373 (7)  |
| C2   | -0.0329 (4) | 1.0370 (3)   | 0.04886 (13)  | 0.0491 (9)  |
| H2   | -0.1058     | 1.0356       | 0.0678        | 0.059*      |
| C3   | -0.0336 (4) | 1.0814 (3)   | 0.00595 (14)  | 0.0570 (11) |
| H3   | -0.1060     | 1.1102       | -0.0044       | 0.068*      |
| C4   | 0.0732 (5)  | 1.0836 (3)   | -0.02213 (14) | 0.0601 (12) |
| H4   | 0.0734      | 1.1146       | -0.0516       | 0.072*      |
| C5   | 0.1778 (4)  | 1.0415 (3)   | -0.00752 (12) | 0.0489 (9)  |
| H5   | 0.2501      | 1.0429       | -0.0268       | 0.059*      |
| C6   | 0.1773 (3)  | 0.9963 (2)   | 0.03604 (10)  | 0.0368 (7)  |
| C7   | 0.2849 (3)  | 0.9456 (2)   | 0.05246 (10)  | 0.0324 (6)  |
| C8   | 0.3923 (3)  | 0.9323 (2)   | 0.02656 (10)  | 0.0387 (7)  |
| H8   | 0.4028      | 0.9588       | -0.0039       | 0.046*      |
| C9   | 0.4842 (3)  | 0.8804 (2)   | 0.04499 (10)  | 0.0357 (7)  |
| C10  | 0.4683 (3)  | 0.8435 (2)   | 0.09047 (10)  | 0.0288 (6)  |
| C11  | 0.3614 (3)  | 0.85953 (19) | 0.11429 (9)   | 0.0268 (6)  |
| H11  | 0.3499      | 0.8341       | 0.1450        | 0.032*      |
| C12  | 0.6044 (4)  | 0.8590 (3)   | 0.01890 (11)  | 0.0471 (9)  |
| H12A | 0.5852      | 0.8302       | -0.0119       | 0.057*      |
| H12B | 0.6492      | 0.9127       | 0.0116        | 0.057*      |
| C13  | 0.6845 (3)  | 0.8020 (3)   | 0.04866 (11)  | 0.0478 (9)  |
| H13  | 0.7662      | 0.7881       | 0.0339        | 0.057*      |
| C14  | 0.6138 (3)  | 0.7235 (2)   | 0.06930 (11)  | 0.0396 (7)  |
| C15  | 0.5698 (3)  | 0.7889 (2)   | 0.10970 (10)  | 0.0342 (7)  |
| H15  | 0.5578      | 0.7648       | 0.1427        | 0.041*      |
| C16  | 0.6912 (3)  | 0.8380 (3)   | 0.10073 (11)  | 0.0416 (8)  |
| H16A | 0.7622      | 0.8169       | 0.1197        | 0.050*      |

|      |             |              |              |             |
|------|-------------|--------------|--------------|-------------|
| H16B | 0.6834      | 0.9011       | 0.1029       | 0.050*      |
| C17  | 0.5173 (4)  | 0.6817 (3)   | 0.03830 (13) | 0.0517 (10) |
| H17A | 0.5573      | 0.6432       | 0.0152       | 0.078*      |
| H17B | 0.4711      | 0.7258       | 0.0209       | 0.078*      |
| H17C | 0.4607      | 0.6487       | 0.0586       | 0.078*      |
| C18  | 0.7006 (4)  | 0.6557 (3)   | 0.09043 (14) | 0.0544 (10) |
| H18A | 0.6539      | 0.6174       | 0.1116       | 0.082*      |
| H18B | 0.7658      | 0.6841       | 0.1090       | 0.082*      |
| H18C | 0.7377      | 0.6224       | 0.0643       | 0.082*      |
| C19  | 0.3120 (3)  | 1.14973 (19) | 0.25080 (9)  | 0.0287 (6)  |
| C20  | 0.4232 (3)  | 1.1938 (2)   | 0.24517 (10) | 0.0354 (7)  |
| H20  | 0.4944      | 1.1632       | 0.2351       | 0.043*      |
| C21  | 0.4322 (3)  | 1.2816 (2)   | 0.25402 (11) | 0.0377 (7)  |
| H21  | 0.5086      | 1.3103       | 0.2498       | 0.045*      |
| C22  | 0.3287 (3)  | 1.3267 (2)   | 0.26899 (11) | 0.0367 (7)  |
| H22  | 0.3341      | 1.3865       | 0.2750       | 0.044*      |
| C23  | 0.2193 (3)  | 1.28502 (19) | 0.27511 (10) | 0.0334 (6)  |
| H23  | 0.1487      | 1.3164       | 0.2851       | 0.040*      |
| C24  | 0.2093 (3)  | 1.19622 (18) | 0.26686 (10) | 0.0291 (6)  |
| C25  | 0.0958 (3)  | 1.14828 (18) | 0.27579 (9)  | 0.0285 (6)  |
| C26  | -0.0139 (3) | 1.1829 (2)   | 0.29340 (11) | 0.0361 (7)  |
| H26  | -0.0209     | 1.2430       | 0.2982       | 0.043*      |
| C27  | -0.1130 (3) | 1.1295 (2)   | 0.30402 (10) | 0.0332 (6)  |
| C28  | -0.1001 (3) | 1.04116 (18) | 0.29788 (9)  | 0.0285 (6)  |
| C29  | 0.0100 (3)  | 1.01079 (19) | 0.27839 (9)  | 0.0276 (6)  |
| H29  | 0.0182      | 0.9511       | 0.2725       | 0.033*      |
| C30  | -0.2339 (3) | 1.1610 (2)   | 0.32411 (13) | 0.0437 (8)  |
| H30A | -0.2722     | 1.2014       | 0.3010       | 0.052*      |
| H30B | -0.2187     | 1.1923       | 0.3545       | 0.052*      |
| C31  | -0.3221 (3) | 1.0867 (2)   | 0.33358 (11) | 0.0395 (7)  |

|      |             |              |              |             |
|------|-------------|--------------|--------------|-------------|
| H31  | -0.4054     | 1.1033       | 0.3459       | 0.047*      |
| C32  | -0.2580 (3) | 1.0127 (2)   | 0.36114 (10) | 0.0379 (7)  |
| C33  | -0.2058 (3) | 0.9856 (2)   | 0.31082 (10) | 0.0311 (6)  |
| H33  | -0.1952     | 0.9227       | 0.3051       | 0.037*      |
| C34  | -0.3226 (3) | 1.0276 (2)   | 0.28915 (10) | 0.0350 (6)  |
| H34A | -0.3083     | 1.0577       | 0.2583       | 0.042*      |
| H34B | -0.3948     | 0.9889       | 0.2872       | 0.042*      |
| C35  | -0.3495 (4) | 0.9485 (3)   | 0.38074 (12) | 0.0496 (9)  |
| H35A | -0.3050     | 0.9012       | 0.3962       | 0.074*      |
| H35B | -0.3998     | 0.9259       | 0.3543       | 0.074*      |
| H35C | -0.4029     | 0.9766       | 0.4044       | 0.074*      |
| C36  | -0.1695 (4) | 1.0349 (3)   | 0.40155 (12) | 0.0568 (11) |
| H36A | -0.2161     | 1.0573       | 0.4290       | 0.085*      |
| H36B | -0.1109     | 1.0783       | 0.3904       | 0.085*      |
| H36C | -0.1245     | 0.9833       | 0.4113       | 0.085*      |
| C37  | 0.0355 (3)  | 0.8359 (2)   | 0.10625 (11) | 0.0328 (6)  |
| C38  | -0.0552 (3) | 0.9693 (2)   | 0.15618 (11) | 0.0359 (7)  |
| C39  | 0.4252 (3)  | 1.00509 (19) | 0.20386 (10) | 0.0290 (6)  |
| C40  | 0.3345 (3)  | 0.9890 (2)   | 0.29425 (11) | 0.0324 (6)  |

Atomic displacement parameters ( $\text{\AA}^2$ )

|     | $U^{11}$        | $U^{22}$        | $U^{33}$        | $U^{12}$        | $U^{13}$        | $U^{23}$        |
|-----|-----------------|-----------------|-----------------|-----------------|-----------------|-----------------|
| Ru1 | 0.02102 (9)     | 0.02548<br>(10) | 0.02671<br>(10) | 0.00067 (9)     | -0.00038<br>(8) | -0.00106<br>(8) |
| Ru2 | 0.02474<br>(10) | 0.02848<br>(11) | 0.03080<br>(11) | -0.00145<br>(9) | -0.00249<br>(9) | -0.00398<br>(9) |
| Cl2 | 0.0291 (3)      | 0.0261 (3)      | 0.0310 (3)      | -0.0002 (3)     | 0.0039 (3)      | -0.0020 (3)     |
| Cl1 | 0.0381 (4)      | 0.0301 (4)      | 0.0325 (3)      | -0.0018 (3)     | -0.0059 (3)     | -0.0006 (3)     |
| O1  | 0.0299 (12)     | 0.0525 (16)     | 0.0609 (14)     | 0.0054 (11)     | 0.0039 (11)     | -0.0117<br>(12) |
| O2  | 0.0395 (13)     | 0.0406 (14)     | 0.0497 (13)     | -0.0051         | 0.0020 (11)     | -0.0114         |

|     |             |             |             |              |              |              |
|-----|-------------|-------------|-------------|--------------|--------------|--------------|
|     |             |             |             | (11)         |              | (11)         |
| O3  | 0.0263 (11) | 0.0551 (15) | 0.0426 (12) | 0.0016 (10)  | 0.0023 (9)   | -0.0054 (10) |
| O4  | 0.0432 (14) | 0.0694 (17) | 0.0359 (11) | 0.0082 (13)  | -0.0053 (10) | 0.0114 (11)  |
| N1  | 0.0289 (11) | 0.0316 (12) | 0.0241 (10) | -0.0016 (11) | -0.0007 (9)  | -0.0018 (9)  |
| N2  | 0.0247 (10) | 0.0269 (11) | 0.0287 (10) | 0.0008 (10)  | -0.0005 (9)  | -0.0022 (10) |
| C1  | 0.0428 (18) | 0.0350 (17) | 0.0340 (14) | -0.0012 (14) | -0.0131 (13) | -0.0041 (12) |
| C2  | 0.0421 (19) | 0.058 (2)   | 0.0469 (19) | 0.0028 (18)  | -0.0184 (15) | -0.0004 (17) |
| C3  | 0.060 (3)   | 0.058 (3)   | 0.054 (2)   | 0.010 (2)    | -0.0267 (19) | 0.0013 (18)  |
| C4  | 0.077 (3)   | 0.060 (3)   | 0.0437 (19) | -0.003 (2)   | -0.026 (2)   | 0.0127 (18)  |
| C5  | 0.056 (2)   | 0.055 (2)   | 0.0356 (16) | -0.0081 (18) | -0.0087 (15) | 0.0036 (14)  |
| C6  | 0.0438 (17) | 0.0350 (17) | 0.0315 (14) | -0.0064 (14) | -0.0104 (13) | -0.0005 (12) |
| C7  | 0.0341 (15) | 0.0357 (16) | 0.0273 (12) | -0.0084 (13) | -0.0034 (11) | -0.0024 (11) |
| C8  | 0.0425 (17) | 0.0468 (19) | 0.0269 (13) | -0.0096 (17) | 0.0024 (12)  | 0.0038 (13)  |
| C9  | 0.0325 (16) | 0.0447 (18) | 0.0298 (14) | -0.0090 (14) | 0.0008 (12)  | -0.0039 (13) |
| C10 | 0.0285 (14) | 0.0320 (15) | 0.0258 (13) | -0.0072 (12) | 0.0024 (10)  | -0.0063 (11) |
| C11 | 0.0283 (13) | 0.0296 (14) | 0.0226 (12) | -0.0036 (11) | -0.0012 (10) | -0.0019 (10) |
| C12 | 0.046 (2)   | 0.064 (2)   | 0.0319 (15) | -0.0060 (19) | 0.0152 (15)  | 0.0004 (15)  |
| C13 | 0.0285 (15) | 0.080 (3)   | 0.0348 (16) | -0.0049 (18) | 0.0073 (13)  | -0.0021 (17) |
| C14 | 0.0332 (16) | 0.051 (2)   | 0.0344 (15) | 0.0061 (15)  | 0.0023 (13)  | -0.0040 (14) |
| C15 | 0.0279 (14) | 0.0482 (19) | 0.0266 (13) | -0.0042      | 0.0040 (11)  | 0.0001 (12)  |

|     |             |             | (13)        |              |              |              |
|-----|-------------|-------------|-------------|--------------|--------------|--------------|
| C16 | 0.0263 (15) | 0.059 (2)   | 0.0393 (16) | -0.0031 (15) | 0.0036 (12)  | -0.0052 (15) |
| C17 | 0.066 (3)   | 0.047 (2)   | 0.0414 (18) | 0.005 (2)    | -0.0011 (17) | -0.0136 (16) |
| C18 | 0.047 (2)   | 0.066 (3)   | 0.0502 (19) | 0.020 (2)    | 0.0057 (16)  | -0.0110 (18) |
| C19 | 0.0303 (14) | 0.0291 (14) | 0.0267 (12) | -0.0018 (12) | -0.0025 (10) | -0.0019 (11) |
| C20 | 0.0309 (16) | 0.0375 (16) | 0.0379 (15) | -0.0041 (13) | 0.0007 (12)  | -0.0034 (13) |
| C21 | 0.0369 (17) | 0.0376 (17) | 0.0387 (16) | -0.0111 (14) | -0.0042 (12) | 0.0024 (13)  |
| C22 | 0.0465 (18) | 0.0266 (15) | 0.0370 (15) | -0.0101 (13) | -0.0085 (14) | 0.0039 (12)  |
| C23 | 0.0365 (15) | 0.0272 (14) | 0.0366 (15) | 0.0032 (13)  | -0.0063 (13) | 0.0014 (11)  |
| C24 | 0.0326 (15) | 0.0269 (13) | 0.0279 (12) | 0.0007 (11)  | -0.0011 (12) | 0.0042 (11)  |
| C25 | 0.0287 (13) | 0.0248 (13) | 0.0321 (13) | 0.0033 (12)  | 0.0007 (11)  | -0.0023 (10) |
| C26 | 0.0345 (16) | 0.0256 (15) | 0.0481 (17) | 0.0052 (13)  | 0.0006 (13)  | -0.0049 (13) |
| C27 | 0.0245 (14) | 0.0367 (16) | 0.0383 (15) | 0.0031 (12)  | 0.0005 (12)  | -0.0074 (12) |
| C28 | 0.0241 (12) | 0.0335 (16) | 0.0278 (12) | 0.0029 (12)  | -0.0014 (11) | -0.0057 (10) |
| C29 | 0.0256 (13) | 0.0253 (14) | 0.0317 (13) | 0.0039 (11)  | -0.0007 (10) | -0.0058 (11) |
| C30 | 0.0327 (16) | 0.0417 (19) | 0.0567 (19) | 0.0046 (15)  | 0.0059 (15)  | -0.0109 (15) |
| C31 | 0.0299 (15) | 0.0465 (19) | 0.0421 (17) | 0.0051 (14)  | 0.0116 (13)  | -0.0072 (14) |
| C32 | 0.0316 (15) | 0.0509 (19) | 0.0312 (14) | -0.0005 (14) | 0.0027 (11)  | -0.0023 (13) |
| C33 | 0.0288 (15) | 0.0327 (15) | 0.0316 (13) | 0.0016 (13)  | 0.0013 (11)  | -0.0064 (12) |

|     |             |             |             |                 |                 |                 |
|-----|-------------|-------------|-------------|-----------------|-----------------|-----------------|
| C34 | 0.0282 (14) | 0.0440 (17) | 0.0328 (14) | 0.0002 (14)     | -0.0013<br>(11) | -0.0047<br>(14) |
| C35 | 0.0422 (19) | 0.063 (3)   | 0.0440 (17) | -0.0023<br>(18) | 0.0104 (15)     | 0.0074 (16)     |
| C36 | 0.060 (2)   | 0.078 (3)   | 0.0331 (16) | -0.009 (2)      | -0.0032<br>(15) | -0.0077<br>(17) |
| C37 | 0.0250 (14) | 0.0379 (17) | 0.0354 (15) | -0.0029<br>(13) | 0.0017 (12)     | -0.0038<br>(13) |
| C38 | 0.0313 (15) | 0.0353 (16) | 0.0412 (15) | -0.0038<br>(14) | -0.0048<br>(12) | -0.0057<br>(14) |
| C39 | 0.0247 (14) | 0.0330 (15) | 0.0294 (13) | 0.0003 (11)     | -0.0021<br>(10) | -0.0021<br>(11) |
| C40 | 0.0243 (13) | 0.0351 (16) | 0.0377 (15) | 0.0024 (12)     | 0.0022 (11)     | 0.0009 (13)     |

**Table 3**

Geometric parameters (Å, °)

|         |            |          |           |
|---------|------------|----------|-----------|
| Ru1—C40 | 1.863 (3)  | C15—C16  | 1.543 (4) |
| Ru1—C39 | 1.885 (3)  | C15—H15  | 1.0000    |
| Ru1—C19 | 2.048 (3)  | C16—H16A | 0.9900    |
| Ru1—N2  | 2.124 (2)  | C16—H16B | 0.9900    |
| Ru1—Cl1 | 2.4570 (7) | C17—H17A | 0.9800    |
| Ru1—Cl2 | 2.5301 (7) | C17—H17B | 0.9800    |
| Ru2—C37 | 1.851 (3)  | C17—H17C | 0.9800    |
| Ru2—C38 | 1.889 (3)  | C18—H18A | 0.9800    |
| Ru2—C1  | 2.048 (3)  | C18—H18B | 0.9800    |
| Ru2—N1  | 2.126 (3)  | C18—H18C | 0.9800    |
| Ru2—Cl1 | 2.4618 (8) | C19—C20  | 1.397 (4) |
| Ru2—Cl2 | 2.5380 (7) | C19—C24  | 1.402 (4) |
| O1—C38  | 1.136 (4)  | C20—C21  | 1.395 (5) |
| O2—C37  | 1.137 (4)  | C20—H20  | 0.9500    |
| O3—C39  | 1.135 (3)  | C21—C22  | 1.388 (5) |
| O4—C40  | 1.132 (3)  | C21—H21  | 0.9500    |

|          |           |          |           |
|----------|-----------|----------|-----------|
| N1—C11   | 1.352 (4) | C22—C23  | 1.363 (5) |
| N1—C7    | 1.358 (4) | C22—H22  | 0.9500    |
| N2—C29   | 1.341 (4) | C23—C24  | 1.408 (4) |
| N2—C25   | 1.362 (4) | C23—H23  | 0.9500    |
| C1—C2    | 1.397 (5) | C24—C25  | 1.461 (4) |
| C1—C6    | 1.400 (5) | C25—C26  | 1.395 (4) |
| C2—C3    | 1.379 (5) | C26—C27  | 1.392 (4) |
| C2—H2    | 0.9500    | C26—H26  | 0.9500    |
| C3—C4    | 1.397 (7) | C27—C28  | 1.395 (4) |
| C3—H3    | 0.9500    | C27—C30  | 1.508 (4) |
| C4—C5    | 1.373 (6) | C28—C29  | 1.395 (4) |
| C4—H4    | 0.9500    | C28—C33  | 1.481 (4) |
| C5—C6    | 1.401 (5) | C29—H29  | 0.9500    |
| C5—H5    | 0.9500    | C30—C31  | 1.527 (5) |
| C6—C7    | 1.482 (5) | C30—H30A | 0.9900    |
| C7—C8    | 1.385 (4) | C30—H30B | 0.9900    |
| C8—C9    | 1.382 (5) | C31—C34  | 1.541 (4) |
| C8—H8    | 0.9500    | C31—C32  | 1.550 (5) |
| C9—C10   | 1.400 (4) | C31—H31  | 1.0000    |
| C9—C12   | 1.529 (5) | C32—C35  | 1.513 (5) |
| C10—C11  | 1.358 (4) | C32—C36  | 1.517 (5) |
| C10—C15  | 1.491 (4) | C32—C33  | 1.568 (4) |
| C11—H11  | 0.9500    | C33—C34  | 1.548 (4) |
| C12—C13  | 1.493 (6) | C33—H33  | 1.0000    |
| C12—H12A | 0.9900    | C34—H34A | 0.9900    |
| C12—H12B | 0.9900    | C34—H34B | 0.9900    |
| C13—C14  | 1.555 (5) | C35—H35A | 0.9800    |
| C13—C16  | 1.555 (5) | C35—H35B | 0.9800    |
| C13—H13  | 1.0000    | C35—H35C | 0.9800    |
| C14—C17  | 1.505 (5) | C36—H36A | 0.9800    |

|             |             |               |           |
|-------------|-------------|---------------|-----------|
| C14—C18     | 1.533 (5)   | C36—H36B      | 0.9800    |
| C14—C15     | 1.591 (4)   | C36—H36C      | 0.9800    |
| C40—Ru1—C39 | 92.67 (12)  | C15—C16—H16A  | 114.3     |
| C40—Ru1—C19 | 91.08 (12)  | C13—C16—H16A  | 114.3     |
| C39—Ru1—C19 | 94.14 (12)  | C15—C16—H16B  | 114.3     |
| C40—Ru1—N2  | 90.62 (11)  | C13—C16—H16B  | 114.3     |
| C39—Ru1—N2  | 172.89 (11) | H16A—C16—H16B | 111.4     |
| C19—Ru1—N2  | 79.49 (11)  | C14—C17—H17A  | 109.5     |
| C40—Ru1—Cl1 | 178.13 (9)  | C14—C17—H17B  | 109.5     |
| C39—Ru1—Cl1 | 89.02 (8)   | H17A—C17—H17B | 109.5     |
| C19—Ru1—Cl1 | 88.01 (8)   | C14—C17—H17C  | 109.5     |
| N2—Ru1—Cl1  | 87.61 (6)   | H17A—C17—H17C | 109.5     |
| C40—Ru1—Cl2 | 96.80 (10)  | H17B—C17—H17C | 109.5     |
| C39—Ru1—Cl2 | 95.01 (9)   | C14—C18—H18A  | 109.5     |
| C19—Ru1—Cl2 | 167.63 (9)  | C14—C18—H18B  | 109.5     |
| N2—Ru1—Cl2  | 90.86 (6)   | H18A—C18—H18B | 109.5     |
| Cl1—Ru1—Cl2 | 83.84 (2)   | C14—C18—H18C  | 109.5     |
| C37—Ru2—C38 | 91.92 (13)  | H18A—C18—H18C | 109.5     |
| C37—Ru2—C1  | 89.51 (13)  | H18B—C18—H18C | 109.5     |
| C38—Ru2—C1  | 95.13 (14)  | C20—C19—C24   | 117.9 (3) |
| C37—Ru2—N1  | 89.60 (11)  | C20—C19—Ru1   | 128.5 (2) |
| C38—Ru2—N1  | 174.35 (12) | C24—C19—Ru1   | 113.5 (2) |
| C1—Ru2—N1   | 79.44 (11)  | C21—C20—C19   | 121.6 (3) |
| C37—Ru2—Cl1 | 176.43 (10) | C21—C20—H20   | 119.2     |
| C38—Ru2—Cl1 | 89.80 (10)  | C19—C20—H20   | 119.2     |
| C1—Ru2—Cl1  | 87.22 (9)   | C22—C21—C20   | 119.6 (3) |
| N1—Ru2—Cl1  | 88.40 (7)   | C22—C21—H21   | 120.2     |
| C37—Ru2—Cl2 | 99.42 (10)  | C20—C21—H21   | 120.2     |
| C38—Ru2—Cl2 | 93.81 (10)  | C23—C22—C21   | 120.0 (3) |
| C1—Ru2—Cl2  | 167.14 (10) | C23—C22—H22   | 120.0     |



|             |             |               |           |
|-------------|-------------|---------------|-----------|
| N1—Ru2—Cl2  | 91.31 (6)   | C21—C22—H22   | 120.0     |
| Cl1—Ru2—Cl2 | 83.58 (2)   | C22—C23—C24   | 121.0 (3) |
| Ru1—Cl2—Ru2 | 94.36 (2)   | C22—C23—H23   | 119.5     |
| Ru1—Cl1—Ru2 | 98.18 (3)   | C24—C23—H23   | 119.5     |
| C11—N1—C7   | 118.9 (3)   | C19—C24—C23   | 119.9 (3) |
| C11—N1—Ru2  | 126.15 (18) | C19—C24—C25   | 117.3 (3) |
| C7—N1—Ru2   | 114.9 (2)   | C23—C24—C25   | 122.7 (3) |
| C29—N2—C25  | 119.9 (2)   | N2—C25—C26    | 120.1 (3) |
| C29—N2—Ru1  | 125.96 (18) | N2—C25—C24    | 114.5 (3) |
| C25—N2—Ru1  | 114.11 (19) | C26—C25—C24   | 125.4 (3) |
| C2—C1—C6    | 117.6 (3)   | C27—C26—C25   | 120.1 (3) |
| C2—C1—Ru2   | 128.0 (3)   | C27—C26—H26   | 120.0     |
| C6—C1—Ru2   | 114.1 (2)   | C25—C26—H26   | 120.0     |
| C3—C2—C1    | 121.8 (4)   | C26—C27—C28   | 119.2 (3) |
| C3—C2—H2    | 119.1       | C26—C27—C30   | 123.7 (3) |
| C1—C2—H2    | 119.1       | C28—C27—C30   | 117.1 (3) |
| C2—C3—C4    | 119.5 (4)   | C29—C28—C27   | 117.9 (3) |
| C2—C3—H3    | 120.3       | C29—C28—C33   | 123.9 (3) |
| C4—C3—H3    | 120.3       | C27—C28—C33   | 118.1 (3) |
| C5—C4—C3    | 120.5 (3)   | N2—C29—C28    | 122.7 (3) |
| C5—C4—H4    | 119.8       | N2—C29—H29    | 118.7     |
| C3—C4—H4    | 119.8       | C28—C29—H29   | 118.7     |
| C4—C5—C6    | 119.6 (4)   | C27—C30—C31   | 111.1 (3) |
| C4—C5—H5    | 120.2       | C27—C30—H30A  | 109.4     |
| C6—C5—H5    | 120.2       | C31—C30—H30A  | 109.4     |
| C1—C6—C5    | 121.1 (3)   | C27—C30—H30B  | 109.4     |
| C1—C6—C7    | 116.7 (3)   | C31—C30—H30B  | 109.4     |
| C5—C6—C7    | 122.1 (3)   | H30A—C30—H30B | 108.0     |
| N1—C7—C8    | 120.3 (3)   | C30—C31—C34   | 108.5 (3) |
| N1—C7—C6    | 114.0 (3)   | C30—C31—C32   | 111.7 (3) |

|               |           |               |           |
|---------------|-----------|---------------|-----------|
| C8—C7—C6      | 125.6 (3) | C34—C31—C32   | 87.3 (2)  |
| C9—C8—C7      | 120.1 (3) | C30—C31—H31   | 115.3     |
| C9—C8—H8      | 119.9     | C34—C31—H31   | 115.3     |
| C7—C8—H8      | 119.9     | C32—C31—H31   | 115.3     |
| C8—C9—C10     | 119.1 (3) | C35—C32—C36   | 107.4 (3) |
| C8—C9—C12     | 124.5 (3) | C35—C32—C31   | 112.1 (3) |
| C10—C9—C12    | 116.3 (3) | C36—C32—C31   | 118.7 (3) |
| C11—C10—C9    | 118.0 (3) | C35—C32—C33   | 112.3 (3) |
| C11—C10—C15   | 124.1 (3) | C36—C32—C33   | 119.6 (3) |
| C9—C10—C15    | 117.9 (3) | C31—C32—C33   | 85.5 (2)  |
| N1—C11—C10    | 123.5 (3) | C28—C33—C34   | 106.9 (2) |
| N1—C11—H11    | 118.3     | C28—C33—C32   | 109.8 (2) |
| C10—C11—H11   | 118.3     | C34—C33—C32   | 86.4 (2)  |
| C13—C12—C9    | 111.3 (3) | C28—C33—H33   | 116.6     |
| C13—C12—H12A  | 109.4     | C34—C33—H33   | 116.6     |
| C9—C12—H12A   | 109.4     | C32—C33—H33   | 116.6     |
| C13—C12—H12B  | 109.4     | C31—C34—C33   | 86.5 (2)  |
| C9—C12—H12B   | 109.4     | C31—C34—H34A  | 114.2     |
| H12A—C12—H12B | 108.0     | C33—C34—H34A  | 114.2     |
| C12—C13—C14   | 112.7 (3) | C31—C34—H34B  | 114.2     |
| C12—C13—C16   | 109.2 (3) | C33—C34—H34B  | 114.2     |
| C14—C13—C16   | 87.9 (2)  | H34A—C34—H34B | 111.4     |
| C12—C13—H13   | 114.7     | C32—C35—H35A  | 109.5     |
| C14—C13—H13   | 114.7     | C32—C35—H35B  | 109.5     |
| C16—C13—H13   | 114.7     | H35A—C35—H35B | 109.5     |
| C17—C14—C18   | 110.3 (3) | C32—C35—H35C  | 109.5     |
| C17—C14—C13   | 118.2 (3) | H35A—C35—H35C | 109.5     |
| C18—C14—C13   | 112.4 (3) | H35B—C35—H35C | 109.5     |
| C17—C14—C15   | 118.3 (3) | C32—C36—H36A  | 109.5     |
| C18—C14—C15   | 110.9 (3) | C32—C36—H36B  | 109.5     |

|             |           |               |           |
|-------------|-----------|---------------|-----------|
| C13—C14—C15 | 84.5 (3)  | H36A—C36—H36B | 109.5     |
| C10—C15—C16 | 106.8 (3) | C32—C36—H36C  | 109.5     |
| C10—C15—C14 | 109.5 (2) | H36A—C36—H36C | 109.5     |
| C16—C15—C14 | 87.1 (2)  | H36B—C36—H36C | 109.5     |
| C10—C15—H15 | 116.5     | O2—C37—Ru2    | 177.1 (3) |
| C16—C15—H15 | 116.5     | O1—C38—Ru2    | 178.3 (3) |
| C14—C15—H15 | 116.5     | O3—C39—Ru1    | 176.3 (3) |
| C15—C16—C13 | 86.1 (2)  | O4—C40—Ru1    | 178.2 (3) |

All esds (except the esd in the dihedral angle between two l.s. planes) are estimated using the full covariance matrix. The cell esds are taken into account individually in the estimation of esds in distances, angles and torsion angles; correlations between esds in cell parameters are only used when they are defined by crystal symmetry. An approximate (isotropic) treatment of cell esds is used for estimating esds involving l.s. planes.

#### 4. 3b

##### *Crystal data*

C<sub>40</sub>H<sub>37</sub>CIN<sub>2</sub>O<sub>5</sub>Ru<sub>2</sub>·

$M_r = 963.50$

Orthorhombic,  $P2_12_12_1$

Hall symbol: ?

$a = 10.8220 (10) \text{ \AA}$

$b = 15.8210 (10) \text{ \AA}$

$c = 27.3240 (10) \text{ \AA}$

$V = 4678.3 (6) \text{ \AA}^3$

$Z = 4$

$F_{000} = 1976$

$D_x = 1.368 \text{ Mg m}^{-3}$

Melting point: ? K

Mo  $K\alpha$  radiation

$\lambda = 0.71069 \text{ \AA}$

Cell parameters from 7309 reflections

$\theta = 1.0\text{--}30.0^\circ$

$\mu = 0.75 \text{ mm}^{-1}$

$T = 150.0 (1) \text{ K}$

Cell measurement pressure: ? kPa

Block, colorless

0.20 × 0.20 × 0.20 mm

##### *Data collection*

KappaCCD  
diffractometer

39432 measured reflections

Radiation source: fine-focus sealed tube 13604 independent reflections

|                                                     |                                         |
|-----------------------------------------------------|-----------------------------------------|
| Monochromator: graphite                             | 12769 reflections with $I > 2\sigma(I)$ |
| Detector resolution: ? pixels $\text{mm}^{-1}$      | $R_{\text{int}} = 0.032$                |
| $T = 150.0(1)$ K                                    | $\theta_{\text{max}} = 30.1^\circ$      |
| $P = ?$ kPa                                         | $\theta_{\text{min}} = 2.9^\circ$       |
| phi and $\omega$ scans                              | $h = -15 \rightarrow 14$                |
| Absorption correction: multi-scan<br>?              | $k = -22 \rightarrow 19$                |
| $T_{\text{min}} = 0.865$ , $T_{\text{max}} = 0.865$ | $l = -38 \rightarrow 35$                |

### Refinement

|                                                                |                                                                                                           |
|----------------------------------------------------------------|-----------------------------------------------------------------------------------------------------------|
| Refinement on $F^2$                                            | Hydrogen site location: inferred from neighbouring sites                                                  |
| Least-squares matrix: full                                     | H atoms treated by a mixture of independent and constrained refinement                                    |
| $R[F^2 > 2\sigma(F^2)] = 0.034$                                | $w = 1/[\sigma^2(F_o^2) + (0.0677P)^2 + 0.3756P]$<br>where $P = (F_o^2 + 2F_c^2)/3$                       |
| $wR(F^2) = 0.098$                                              | $(\Delta/\sigma)_{\text{max}} = 0.001$                                                                    |
| $S = 1.05$                                                     | $\Delta\rho_{\text{max}} = 0.79 \text{ e } \text{\AA}^{-3}$                                               |
| 13604 reflections                                              | $\Delta\rho_{\text{min}} = -1.65 \text{ e } \text{\AA}^{-3}$                                              |
| 459 parameters                                                 | Extinction correction: SHELXL,<br>$F_c^* = kF_c[1 + 0.001 \times F_c^2 \lambda^3 / \sin(2\theta)]^{-1/4}$ |
| ? constraints                                                  | Extinction coefficient: 0.0038 (4)                                                                        |
| Primary atom site location: structure-invariant direct methods | Absolute structure: Flack H D (1983),<br>Acta Cryst. A39, 876-881                                         |
| Secondary atom site location: difference Fourier map           | Flack parameter: 0.03 (2)                                                                                 |

Refinement of  $F^2$  against ALL reflections. The weighted R-factor  $wR$  and goodness of fit  $S$  are based on  $F^2$ , conventional R-factors  $R$  are based on  $F$ , with  $F$  set to zero for negative  $F^2$ . The threshold expression of  $F^2 > 2\sigma(F^2)$  is used only for calculating R-factors(gt) etc. and is not relevant to the choice of reflections for refinement. R-factors based on  $F^2$  are statistically about twice as large as those based on  $F$ , and R-factors based on ALL data will be even larger.

A large cavity near -0.2 0.25 0.00 contains ill defined solvent that was interpreted as an heptane molecule and accounted for using the Platon SQUEEZE function.

Fractional atomic coordinates and isotropic or equivalent isotropic displacement parameters ( $\text{\AA}^2$ )

|     | x             | y              | z            | $U_{\text{iso}}^*/U_{\text{eq}}$ |
|-----|---------------|----------------|--------------|----------------------------------|
| Ru1 | 0.777573 (17) | -0.020897 (12) | 0.244578 (7) | 0.02623 (6)                      |
| Ru2 | 0.605947 (18) | -0.099907 (13) | 0.146024 (8) | 0.02918 (6)                      |
| Cl1 | 0.68716 (6)   | -0.16531 (4)   | 0.22506 (2)  | 0.03057 (12)                     |

|      |              |               |              |            |
|------|--------------|---------------|--------------|------------|
| O1   | 0.69235 (18) | 0.00454 (12)  | 0.17772 (7)  | 0.0320 (4) |
| H1   | 0.642 (3)    | 0.037 (2)     | 0.1741 (14)  | 0.038*     |
| O2   | 0.8801 (2)   | -0.06163 (19) | 0.34312 (8)  | 0.0532 (6) |
| O3   | 1.02243 (19) | -0.04608 (15) | 0.19457 (9)  | 0.0414 (5) |
| O4   | 0.3574 (2)   | -0.05187 (16) | 0.18765 (10) | 0.0473 (5) |
| O5   | 0.5038 (2)   | -0.25127 (15) | 0.09350 (9)  | 0.0439 (5) |
| N1   | 0.6097 (2)   | 0.01982 (14)  | 0.27683 (8)  | 0.0282 (4) |
| N2   | 0.7776 (2)   | -0.11995 (13) | 0.10998 (8)  | 0.0296 (4) |
| C1   | 0.8131 (2)   | 0.10489 (15)  | 0.25370 (10) | 0.0290 (4) |
| C2   | 0.9229 (2)   | 0.14889 (18)  | 0.24456 (11) | 0.0359 (5) |
| H2   | 0.9953       | 0.1183        | 0.2360       | 0.043*     |
| C3   | 0.9278 (3)   | 0.23649 (18)  | 0.24778 (11) | 0.0398 (6) |
| H3   | 1.0036       | 0.2652        | 0.2421       | 0.048*     |
| C4   | 0.8215 (3)   | 0.28230 (18)  | 0.25934 (11) | 0.0399 (6) |
| H4   | 0.8241       | 0.3423        | 0.2605       | 0.048*     |
| C5   | 0.7135 (3)   | 0.24057 (17)  | 0.26903 (10) | 0.0344 (5) |
| H5   | 0.6417       | 0.2719        | 0.2774       | 0.041*     |
| C6   | 0.7076 (2)   | 0.15197 (16)  | 0.26673 (9)  | 0.0306 (5) |
| C7   | 0.5966 (2)   | 0.10419 (16)  | 0.27976 (10) | 0.0306 (5) |
| C8   | 0.4846 (3)   | 0.13961 (18)  | 0.29584 (11) | 0.0370 (6) |
| H8   | 0.4748       | 0.1993        | 0.2963       | 0.044*     |
| C9   | 0.3897 (2)   | 0.08879 (17)  | 0.31081 (11) | 0.0337 (5) |
| C10  | 0.4060 (2)   | 0.00112 (16)  | 0.30942 (10) | 0.0300 (5) |
| C11  | 0.5166 (2)   | -0.03098 (16) | 0.29237 (9)  | 0.0281 (5) |
| H11  | 0.5278       | -0.0905       | 0.2915       | 0.034*     |
| C12  | 0.2676 (3)   | 0.1228 (2)    | 0.32877 (14) | 0.0479 (8) |
| H12A | 0.2288       | 0.1573        | 0.3027       | 0.057*     |
| H12B | 0.2815       | 0.1597        | 0.3575       | 0.057*     |
| C13  | 0.1806 (3)   | 0.0501 (2)    | 0.34295 (12) | 0.0415 (7) |
| H13  | 0.0968       | 0.0677        | 0.3545       | 0.050*     |

|      |            |               |              |             |
|------|------------|---------------|--------------|-------------|
| C14  | 0.1817 (2) | -0.0164 (2)   | 0.30186 (10) | 0.0348 (5)  |
| H14A | 0.1948     | 0.0072        | 0.2687       | 0.042*      |
| H14B | 0.1104     | -0.0557       | 0.3025       | 0.042*      |
| C15  | 0.3015 (2) | -0.05231 (17) | 0.32645 (10) | 0.0317 (5)  |
| H15  | 0.3136     | -0.1149       | 0.3249       | 0.038*      |
| C16  | 0.2485 (3) | -0.0153 (2)   | 0.37640 (10) | 0.0414 (6)  |
| C17  | 0.3353 (4) | 0.0183 (4)    | 0.41527 (14) | 0.0686 (12) |
| H17A | 0.2871     | 0.0441        | 0.4417       | 0.103*      |
| H17B | 0.3901     | 0.0608        | 0.4008       | 0.103*      |
| H17C | 0.3848     | -0.0283       | 0.4285       | 0.103*      |
| C18  | 0.1587 (4) | -0.0780 (3)   | 0.40017 (14) | 0.0561 (9)  |
| H18A | 0.2056     | -0.1212       | 0.4179       | 0.084*      |
| H18B | 0.1086     | -0.1051       | 0.3747       | 0.084*      |
| H18C | 0.1046     | -0.0479       | 0.4230       | 0.084*      |
| C19  | 0.5783 (3) | -0.03114 (17) | 0.08419 (10) | 0.0343 (5)  |
| C20  | 0.4710 (3) | 0.0118 (2)    | 0.06983 (13) | 0.0484 (8)  |
| H20  | 0.3977     | 0.0059        | 0.0886       | 0.058*      |
| C21  | 0.4703 (4) | 0.0631 (3)    | 0.02827 (14) | 0.0576 (10) |
| H21  | 0.3965     | 0.0911        | 0.0187       | 0.069*      |
| C22  | 0.5795 (4) | 0.0735 (2)    | 0.00031 (14) | 0.0553 (9)  |
| H22  | 0.5801     | 0.1096        | -0.0275      | 0.066*      |
| C23  | 0.6836 (3) | 0.0311 (2)    | 0.01370 (13) | 0.0457 (7)  |
| H23  | 0.7566     | 0.0379        | -0.0052      | 0.055*      |
| C24  | 0.6861 (3) | -0.02254 (18) | 0.05480 (10) | 0.0359 (5)  |
| C25  | 0.7925 (3) | -0.07384 (16) | 0.06855 (10) | 0.0321 (5)  |
| C26  | 0.9019 (3) | -0.08158 (19) | 0.04152 (11) | 0.0387 (6)  |
| H26  | 0.9124     | -0.0492       | 0.0125       | 0.046*      |
| C27  | 0.9938 (3) | -0.13524 (19) | 0.05635 (10) | 0.0362 (6)  |
| C28  | 0.9761 (2) | -0.18377 (17) | 0.09938 (9)  | 0.0297 (5)  |
| C29  | 0.8665 (2) | -0.17290 (17) | 0.12447 (9)  | 0.0294 (5)  |

|      |            |               |              |            |
|------|------------|---------------|--------------|------------|
| H29  | 0.8536     | -0.2047       | 0.1535       | 0.035*     |
| C30  | 1.1133 (3) | -0.1489 (2)   | 0.02807 (11) | 0.0458 (7) |
| H30A | 1.1583     | -0.0947       | 0.0251       | 0.055*     |
| H30B | 1.0941     | -0.1694       | -0.0053      | 0.055*     |
| C31  | 1.1946 (3) | -0.2135 (2)   | 0.05427 (11) | 0.0456 (7) |
| H31  | 1.2767     | -0.2239       | 0.0386       | 0.055*     |
| C32  | 1.1999 (3) | -0.1907 (2)   | 0.10960 (11) | 0.0429 (7) |
| H32A | 1.2710     | -0.2156       | 0.1273       | 0.051*     |
| H32B | 1.1915     | -0.1296       | 0.1166       | 0.051*     |
| C33  | 1.0780 (2) | -0.24159 (19) | 0.11467 (10) | 0.0335 (5) |
| H33  | 1.0658     | -0.2728       | 0.1461       | 0.040*     |
| C34  | 1.1216 (3) | -0.2956 (2)   | 0.06940 (11) | 0.0408 (6) |
| C35  | 1.2080 (4) | -0.3654 (2)   | 0.08464 (13) | 0.0537 (8) |
| H35A | 1.1600     | -0.4155       | 0.0937       | 0.081*     |
| H35B | 1.2572     | -0.3468       | 0.1127       | 0.081*     |
| H35C | 1.2632     | -0.3794       | 0.0574       | 0.081*     |
| C36  | 1.0252 (3) | -0.3293 (2)   | 0.03455 (13) | 0.0500 (8) |
| H36A | 1.0661     | -0.3562       | 0.0066       | 0.075*     |
| H36B | 0.9735     | -0.2825       | 0.0229       | 0.075*     |
| H36C | 0.9735     | -0.3708       | 0.0515       | 0.075*     |
| C37  | 0.8430 (2) | -0.0465 (2)   | 0.30569 (11) | 0.0368 (6) |
| C38  | 0.9306 (2) | -0.03991 (16) | 0.21357 (10) | 0.0304 (5) |
| C39  | 0.4516 (3) | -0.07123 (18) | 0.17264 (11) | 0.0352 (6) |
| C40  | 0.5405 (3) | -0.19406 (18) | 0.11502 (11) | 0.0349 (5) |

Atomic displacement parameters ( $\text{\AA}^2$ )

|     | $U^{11}$       | $U^{22}$        | $U^{33}$        | $U^{12}$    | $U^{13}$        | $U^{23}$        |
|-----|----------------|-----------------|-----------------|-------------|-----------------|-----------------|
| Ru1 | 0.02450<br>(9) | 0.02500 (9)     | 0.02918<br>(10) | 0.00062 (6) | 0.00012 (7)     | -0.00133<br>(7) |
| Ru2 | 0.02816<br>(9) | 0.02711<br>(10) | 0.03227<br>(10) | 0.00002 (7) | -0.00206<br>(7) | -0.00519<br>(7) |

|     |             |             |             |              |              |              |
|-----|-------------|-------------|-------------|--------------|--------------|--------------|
| C11 | 0.0326 (3)  | 0.0249 (3)  | 0.0342 (3)  | 0.0003 (2)   | 0.0045 (2)   | -0.0011 (2)  |
| O1  | 0.0373 (9)  | 0.0276 (9)  | 0.0312 (9)  | 0.0000 (7)   | -0.0067 (7)  | -0.0044 (7)  |
| O2  | 0.0413 (12) | 0.0825 (18) | 0.0360 (12) | 0.0070 (12)  | -0.0055 (9)  | 0.0124 (11)  |
| O3  | 0.0325 (10) | 0.0446 (11) | 0.0470 (12) | 0.0021 (9)   | 0.0051 (9)   | -0.0062 (9)  |
| O4  | 0.0325 (10) | 0.0537 (14) | 0.0557 (14) | 0.0036 (10)  | 0.0011 (10)  | -0.0126 (11) |
| O5  | 0.0420 (11) | 0.0384 (10) | 0.0514 (13) | -0.0065 (9)  | 0.0004 (10)  | -0.0142 (9)  |
| N1  | 0.0259 (9)  | 0.0268 (9)  | 0.0320 (10) | 0.0036 (9)   | 0.0004 (8)   | -0.0042 (8)  |
| N2  | 0.0337 (10) | 0.0252 (9)  | 0.0300 (10) | -0.0044 (8)  | -0.0010 (9)  | -0.0037 (7)  |
| C1  | 0.0317 (10) | 0.0245 (10) | 0.0309 (11) | -0.0055 (9)  | -0.0042 (9)  | 0.0003 (9)   |
| C2  | 0.0338 (12) | 0.0364 (13) | 0.0376 (14) | -0.0039 (10) | 0.0004 (11)  | -0.0016 (11) |
| C3  | 0.0412 (13) | 0.0366 (13) | 0.0417 (15) | -0.0114 (11) | -0.0014 (12) | -0.0024 (12) |
| C4  | 0.0523 (16) | 0.0291 (12) | 0.0382 (14) | -0.0069 (12) | -0.0037 (13) | 0.0000 (11)  |
| C5  | 0.0405 (13) | 0.0272 (12) | 0.0357 (13) | -0.0012 (10) | -0.0019 (11) | -0.0028 (9)  |
| C6  | 0.0335 (12) | 0.0282 (11) | 0.0301 (12) | -0.0018 (9)  | -0.0024 (9)  | -0.0032 (9)  |
| C7  | 0.0312 (11) | 0.0265 (11) | 0.0340 (12) | 0.0008 (10)  | -0.0028 (10) | 0.0001 (9)   |
| C8  | 0.0372 (13) | 0.0269 (12) | 0.0470 (16) | 0.0046 (10)  | 0.0015 (12)  | -0.0054 (11) |
| C9  | 0.0297 (11) | 0.0316 (12) | 0.0397 (14) | 0.0034 (10)  | 0.0019 (10)  | -0.0084 (10) |
| C10 | 0.0257 (11) | 0.0336 (12) | 0.0306 (12) | -0.0001 (9)  | -0.0005 (9)  | -0.0065 (9)  |
| C11 | 0.0306 (11) | 0.0243 (11) | 0.0295 (11) | -0.0005 (9)  | 0.0014 (9)   | -0.0009 (9)  |
| C12 | 0.0412 (15) | 0.0378 (15) | 0.065 (2)   | 0.0054 (12)  | 0.0101 (15)  | -0.0154 (14) |



|     |                |             |             |                 |                 |                 |
|-----|----------------|-------------|-------------|-----------------|-----------------|-----------------|
| C13 | 0.0351<br>(13) | 0.0438 (15) | 0.0456 (17) | 0.0048 (12)     | 0.0116 (12)     | -0.0109<br>(12) |
| C14 | 0.0287<br>(11) | 0.0427 (14) | 0.0330 (13) | 0.0007 (11)     | 0.0022 (9)      | -0.0051<br>(11) |
| C15 | 0.0289<br>(12) | 0.0331 (12) | 0.0330 (13) | -0.0001<br>(10) | 0.0005 (9)      | -0.0031<br>(10) |
| C16 | 0.0392<br>(14) | 0.0555 (17) | 0.0296 (13) | -0.0022<br>(13) | 0.0065 (10)     | -0.0072<br>(12) |
| C17 | 0.061 (2)      | 0.106 (3)   | 0.0382 (18) | -0.016 (2)      | -0.0051<br>(16) | -0.013 (2)      |
| C18 | 0.0509<br>(19) | 0.070 (2)   | 0.0478 (19) | -0.0048<br>(17) | 0.0178 (16)     | 0.0041 (16)     |
| C19 | 0.0404<br>(14) | 0.0316 (12) | 0.0309 (12) | 0.0029 (11)     | -0.0080<br>(10) | -0.0052<br>(10) |
| C20 | 0.0494<br>(17) | 0.0510 (18) | 0.0447 (16) | 0.0126 (15)     | -0.0152<br>(14) | -0.0103<br>(14) |
| C21 | 0.063 (2)      | 0.062 (2)   | 0.0478 (19) | 0.0172 (19)     | -0.0225<br>(17) | 0.0000 (16)     |
| C22 | 0.069 (2)      | 0.0509 (19) | 0.0465 (19) | 0.0049 (17)     | -0.0223<br>(17) | 0.0044 (14)     |
| C23 | 0.0537<br>(17) | 0.0400 (16) | 0.0434 (16) | -0.0046<br>(14) | -0.0106<br>(14) | 0.0067 (13)     |
| C24 | 0.0423<br>(14) | 0.0310 (12) | 0.0345 (13) | -0.0024<br>(11) | -0.0110<br>(10) | -0.0026<br>(10) |
| C25 | 0.0365<br>(13) | 0.0282 (11) | 0.0317 (12) | -0.0060<br>(10) | -0.0040<br>(10) | -0.0012 (9)     |
| C26 | 0.0434<br>(14) | 0.0417 (14) | 0.0310 (13) | -0.0101<br>(12) | 0.0002 (11)     | 0.0065 (11)     |
| C27 | 0.0366<br>(13) | 0.0447 (15) | 0.0272 (12) | -0.0064<br>(12) | 0.0012 (10)     | 0.0013 (11)     |
| C28 | 0.0296<br>(11) | 0.0326 (12) | 0.0269 (11) | -0.0049<br>(10) | -0.0002 (9)     | -0.0009 (9)     |
| C29 | 0.0303<br>(11) | 0.0304 (12) | 0.0276 (12) | -0.0043 (9)     | 0.0009 (9)      | -0.0014 (9)     |
| C30 | 0.0376<br>(14) | 0.068 (2)   | 0.0320 (14) | -0.0056<br>(15) | 0.0102 (12)     | 0.0084 (13)     |
| C31 | 0.0366<br>(14) | 0.068 (2)   | 0.0324 (14) | -0.0011<br>(14) | 0.0085 (11)     | -0.0001<br>(13) |

|     |                |             |             |                 |                 |                 |
|-----|----------------|-------------|-------------|-----------------|-----------------|-----------------|
| C32 | 0.0335<br>(14) | 0.0593 (19) | 0.0358 (15) | -0.0054<br>(13) | 0.0016 (11)     | -0.0012<br>(13) |
| C33 | 0.0303<br>(12) | 0.0433 (14) | 0.0269 (12) | 0.0007 (10)     | 0.0015 (9)      | -0.0003<br>(10) |
| C34 | 0.0363<br>(14) | 0.0524 (17) | 0.0338 (14) | 0.0075 (13)     | 0.0029 (11)     | -0.0032<br>(12) |
| C35 | 0.058 (2)      | 0.061 (2)   | 0.0414 (17) | 0.0165 (17)     | 0.0079 (15)     | -0.0055<br>(15) |
| C36 | 0.0567<br>(19) | 0.0538 (19) | 0.0394 (16) | 0.0042 (16)     | -0.0052<br>(14) | -0.0142<br>(14) |
| C37 | 0.0286<br>(12) | 0.0452 (15) | 0.0367 (14) | 0.0023 (11)     | 0.0015 (11)     | 0.0016 (11)     |
| C38 | 0.0280<br>(11) | 0.0292 (12) | 0.0340 (13) | 0.0024 (9)      | -0.0025 (9)     | -0.0030 (9)     |
| C39 | 0.0338<br>(13) | 0.0341 (13) | 0.0376 (14) | -0.0021<br>(10) | -0.0043<br>(11) | -0.0073<br>(10) |
| C40 | 0.0319<br>(12) | 0.0355 (13) | 0.0375 (14) | 0.0000 (11)     | 0.0021 (10)     | -0.0033<br>(11) |

**Table 4**

Geometric parameters (Å, °)

|         |             |          |           |
|---------|-------------|----------|-----------|
| Ru1—C37 | 1.859 (3)   | C15—C16  | 1.592 (4) |
| Ru1—C38 | 1.884 (3)   | C15—H15  | 1.0000    |
| Ru1—C1  | 2.042 (2)   | C16—C17  | 1.514 (5) |
| Ru1—O1  | 2.0856 (19) | C16—C18  | 1.533 (5) |
| Ru1—N1  | 2.119 (2)   | C17—H17A | 0.9800    |
| Ru1—Cl1 | 2.5420 (6)  | C17—H17B | 0.9800    |
| Ru2—C40 | 1.854 (3)   | C17—H17C | 0.9800    |
| Ru2—C39 | 1.878 (3)   | C18—H18A | 0.9800    |
| Ru2—C19 | 2.032 (3)   | C18—H18B | 0.9800    |
| Ru2—O1  | 2.0869 (18) | C18—H18C | 0.9800    |
| Ru2—N2  | 2.126 (2)   | C19—C20  | 1.401 (4) |
| Ru2—Cl1 | 2.5508 (7)  | C19—C24  | 1.423 (4) |
| O1—H1   | 0.76 (4)    | C20—C21  | 1.396 (5) |

|          |           |          |           |
|----------|-----------|----------|-----------|
| O2—C37   | 1.124 (4) | C20—H20  | 0.9500    |
| O3—C38   | 1.126 (3) | C21—C22  | 1.417 (6) |
| O4—C39   | 1.140 (4) | C21—H21  | 0.9500    |
| O5—C40   | 1.150 (4) | C22—C23  | 1.361 (5) |
| N1—C7    | 1.345 (3) | C22—H22  | 0.9500    |
| N1—C11   | 1.358 (3) | C23—C24  | 1.408 (4) |
| N2—C29   | 1.336 (3) | C23—H23  | 0.9500    |
| N2—C25   | 1.356 (3) | C24—C25  | 1.458 (4) |
| C1—C2    | 1.399 (3) | C25—C26  | 1.400 (4) |
| C1—C6    | 1.409 (4) | C26—C27  | 1.369 (4) |
| C2—C3    | 1.390 (4) | C26—H26  | 0.9500    |
| C2—H2    | 0.9500    | C27—C28  | 1.417 (4) |
| C3—C4    | 1.396 (4) | C27—C30  | 1.522 (4) |
| C3—H3    | 0.9500    | C28—C29  | 1.381 (4) |
| C4—C5    | 1.368 (4) | C28—C33  | 1.492 (4) |
| C4—H4    | 0.9500    | C29—H29  | 0.9500    |
| C5—C6    | 1.405 (4) | C30—C31  | 1.526 (5) |
| C5—H5    | 0.9500    | C30—H30A | 0.9900    |
| C6—C7    | 1.463 (4) | C30—H30B | 0.9900    |
| C7—C8    | 1.406 (4) | C31—C32  | 1.555 (4) |
| C8—C9    | 1.367 (4) | C31—C34  | 1.577 (5) |
| C8—H8    | 0.9500    | C31—H31  | 1.0000    |
| C9—C10   | 1.399 (4) | C32—C33  | 1.552 (4) |
| C9—C12   | 1.509 (4) | C32—H32A | 0.9900    |
| C10—C11  | 1.381 (3) | C32—H32B | 0.9900    |
| C10—C15  | 1.487 (4) | C33—C34  | 1.576 (4) |
| C11—H11  | 0.9500    | C33—H33  | 1.0000    |
| C12—C13  | 1.536 (5) | C34—C35  | 1.506 (5) |
| C12—H12A | 0.9900    | C34—C36  | 1.509 (4) |
| C12—H12B | 0.9900    | C35—H35A | 0.9800    |

|             |             |               |             |
|-------------|-------------|---------------|-------------|
| C13—C14     | 1.539 (4)   | C35—H35B      | 0.9800      |
| C13—C16     | 1.564 (5)   | C35—H35C      | 0.9800      |
| C13—H13     | 1.0000      | C36—H36A      | 0.9800      |
| C14—C15     | 1.567 (4)   | C36—H36B      | 0.9800      |
| C14—H14A    | 0.9900      | C36—H36C      | 0.9800      |
| C14—H14B    | 0.9900      |               |             |
| C37—Ru1—C38 | 91.97 (12)  | C17—C16—C18   | 108.8 (3)   |
| C37—Ru1—C1  | 91.79 (12)  | C17—C16—C13   | 118.0 (3)   |
| C38—Ru1—C1  | 92.57 (11)  | C18—C16—C13   | 112.2 (3)   |
| C37—Ru1—O1  | 175.99 (10) | C17—C16—C15   | 120.5 (3)   |
| C38—Ru1—O1  | 91.46 (10)  | C18—C16—C15   | 110.7 (3)   |
| C1—Ru1—O1   | 90.13 (9)   | C13—C16—C15   | 84.9 (2)    |
| C37—Ru1—N1  | 91.11 (10)  | C16—C17—H17A  | 109.5       |
| C38—Ru1—N1  | 171.41 (10) | C16—C17—H17B  | 109.5       |
| C1—Ru1—N1   | 79.31 (9)   | H17A—C17—H17B | 109.5       |
| O1—Ru1—N1   | 85.79 (8)   | C16—C17—H17C  | 109.5       |
| C37—Ru1—Cl1 | 97.98 (10)  | H17A—C17—H17C | 109.5       |
| C38—Ru1—Cl1 | 95.76 (8)   | H17B—C17—H17C | 109.5       |
| C1—Ru1—Cl1  | 166.90 (7)  | C16—C18—H18A  | 109.5       |
| O1—Ru1—Cl1  | 79.60 (5)   | C16—C18—H18B  | 109.5       |
| N1—Ru1—Cl1  | 91.75 (6)   | H18A—C18—H18B | 109.5       |
| C40—Ru2—C39 | 91.78 (12)  | C16—C18—H18C  | 109.5       |
| C40—Ru2—C19 | 89.65 (12)  | H18A—C18—H18C | 109.5       |
| C39—Ru2—C19 | 93.53 (12)  | H18B—C18—H18C | 109.5       |
| C40—Ru2—O1  | 175.48 (11) | C20—C19—C24   | 118.4 (3)   |
| C39—Ru2—O1  | 92.67 (10)  | C20—C19—Ru2   | 127.9 (2)   |
| C19—Ru2—O1  | 89.26 (9)   | C24—C19—Ru2   | 113.55 (19) |
| C40—Ru2—N2  | 90.14 (10)  | C21—C20—C19   | 120.9 (4)   |
| C39—Ru2—N2  | 173.08 (11) | C21—C20—H20   | 119.5       |
| C19—Ru2—N2  | 79.82 (10)  | C19—C20—H20   | 119.5       |

|             |             |              |           |
|-------------|-------------|--------------|-----------|
| O1—Ru2—N2   | 85.35 (8)   | C20—C21—C22  | 120.1 (3) |
| C40—Ru2—Cl1 | 101.10 (9)  | C20—C21—H21  | 120.0     |
| C39—Ru2—Cl1 | 94.40 (9)   | C22—C21—H21  | 120.0     |
| C19—Ru2—Cl1 | 166.41 (8)  | C23—C22—C21  | 119.3 (3) |
| O1—Ru2—Cl1  | 79.37 (6)   | C23—C22—H22  | 120.4     |
| N2—Ru2—Cl1  | 91.76 (6)   | C21—C22—H22  | 120.4     |
| Ru1—Cl1—Ru2 | 86.88 (2)   | C22—C23—C24  | 121.8 (3) |
| Ru1—O1—Ru2  | 114.13 (9)  | C22—C23—H23  | 119.1     |
| Ru1—O1—H1   | 124 (3)     | C24—C23—H23  | 119.1     |
| Ru2—O1—H1   | 99 (3)      | C23—C24—C19  | 119.5 (3) |
| C7—N1—C11   | 119.4 (2)   | C23—C24—C25  | 123.8 (3) |
| C7—N1—Ru1   | 114.66 (18) | C19—C24—C25  | 116.7 (2) |
| C11—N1—Ru1  | 125.93 (16) | N2—C25—C26   | 119.6 (3) |
| C29—N2—C25  | 119.9 (2)   | N2—C25—C24   | 114.8 (2) |
| C29—N2—Ru2  | 125.85 (17) | C26—C25—C24  | 125.5 (3) |
| C25—N2—Ru2  | 114.25 (18) | C27—C26—C25  | 120.8 (3) |
| C2—C1—C6    | 118.0 (2)   | C27—C26—H26  | 119.6     |
| C2—C1—Ru1   | 128.5 (2)   | C25—C26—H26  | 119.6     |
| C6—C1—Ru1   | 113.15 (17) | C26—C27—C28  | 118.9 (3) |
| C3—C2—C1    | 121.2 (3)   | C26—C27—C30  | 123.8 (3) |
| C3—C2—H2    | 119.4       | C28—C27—C30  | 117.3 (3) |
| C1—C2—H2    | 119.4       | C29—C28—C27  | 117.4 (3) |
| C2—C3—C4    | 120.0 (3)   | C29—C28—C33  | 124.9 (2) |
| C2—C3—H3    | 120.0       | C27—C28—C33  | 117.7 (2) |
| C4—C3—H3    | 120.0       | N2—C29—C28   | 123.4 (2) |
| C5—C4—C3    | 119.8 (3)   | N2—C29—H29   | 118.3     |
| C5—C4—H4    | 120.1       | C28—C29—H29  | 118.3     |
| C3—C4—H4    | 120.1       | C27—C30—C31  | 110.3 (2) |
| C4—C5—C6    | 120.8 (3)   | C27—C30—H30A | 109.6     |
| C4—C5—H5    | 119.6       | C31—C30—H30A | 109.6     |

|               |           |               |           |
|---------------|-----------|---------------|-----------|
| C6—C5—H5      | 119.6     | C27—C30—H30B  | 109.6     |
| C5—C6—C1      | 120.1 (3) | C31—C30—H30B  | 109.6     |
| C5—C6—C7      | 122.8 (3) | H30A—C30—H30B | 108.1     |
| C1—C6—C7      | 117.0 (2) | C30—C31—C32   | 108.8 (3) |
| N1—C7—C8      | 120.4 (2) | C30—C31—C34   | 112.7 (3) |
| N1—C7—C6      | 114.3 (2) | C32—C31—C34   | 87.4 (2)  |
| C8—C7—C6      | 125.3 (2) | C30—C31—H31   | 114.9     |
| C9—C8—C7      | 120.4 (2) | C32—C31—H31   | 114.9     |
| C9—C8—H8      | 119.8     | C34—C31—H31   | 114.9     |
| C7—C8—H8      | 119.8     | C33—C32—C31   | 86.3 (2)  |
| C8—C9—C10     | 118.7 (2) | C33—C32—H32A  | 114.3     |
| C8—C9—C12     | 123.0 (3) | C31—C32—H32A  | 114.3     |
| C10—C9—C12    | 118.2 (3) | C33—C32—H32B  | 114.3     |
| C11—C10—C9    | 118.9 (2) | C31—C32—H32B  | 114.3     |
| C11—C10—C15   | 123.8 (2) | H32A—C32—H32B | 111.4     |
| C9—C10—C15    | 117.4 (2) | C28—C33—C32   | 106.6 (2) |
| N1—C11—C10    | 122.1 (2) | C28—C33—C34   | 109.5 (2) |
| N1—C11—H11    | 118.9     | C32—C33—C34   | 87.5 (2)  |
| C10—C11—H11   | 118.9     | C28—C33—H33   | 116.5     |
| C9—C12—C13    | 110.6 (2) | C32—C33—H33   | 116.5     |
| C9—C12—H12A   | 109.5     | C34—C33—H33   | 116.5     |
| C13—C12—H12A  | 109.5     | C35—C34—C36   | 110.2 (3) |
| C9—C12—H12B   | 109.5     | C35—C34—C33   | 111.5 (3) |
| C13—C12—H12B  | 109.5     | C36—C34—C33   | 118.7 (2) |
| H12A—C12—H12B | 108.1     | C35—C34—C31   | 111.5 (3) |
| C12—C13—C14   | 108.9 (2) | C36—C34—C31   | 118.1 (3) |
| C12—C13—C16   | 110.8 (3) | C33—C34—C31   | 84.7 (2)  |
| C14—C13—C16   | 88.3 (2)  | C34—C35—H35A  | 109.5     |
| C12—C13—H13   | 115.3     | C34—C35—H35B  | 109.5     |
| C14—C13—H13   | 115.3     | H35A—C35—H35B | 109.5     |

|               |           |               |           |
|---------------|-----------|---------------|-----------|
| C16—C13—H13   | 115.3     | C34—C35—H35C  | 109.5     |
| C13—C14—C15   | 86.6 (2)  | H35A—C35—H35C | 109.5     |
| C13—C14—H14A  | 114.2     | H35B—C35—H35C | 109.5     |
| C15—C14—H14A  | 114.2     | C34—C36—H36A  | 109.5     |
| C13—C14—H14B  | 114.2     | C34—C36—H36B  | 109.5     |
| C15—C14—H14B  | 114.2     | H36A—C36—H36B | 109.5     |
| H14A—C14—H14B | 111.4     | C34—C36—H36C  | 109.5     |
| C10—C15—C14   | 106.8 (2) | H36A—C36—H36C | 109.5     |
| C10—C15—C16   | 109.4 (2) | H36B—C36—H36C | 109.5     |
| C14—C15—C16   | 86.4 (2)  | O2—C37—Ru1    | 178.4 (3) |
| C10—C15—H15   | 116.7     | O3—C38—Ru1    | 175.8 (2) |
| C14—C15—H15   | 116.7     | O4—C39—Ru2    | 177.8 (3) |
| C16—C15—H15   | 116.7     | O5—C40—Ru2    | 176.1 (3) |

All esds (except the esd in the dihedral angle between two l.s. planes) are estimated using the full covariance matrix. The cell esds are taken into account individually in the estimation of esds in distances, angles and torsion angles; correlations between esds in cell parameters are only used when they are defined by crystal symmetry. An approximate (isotropic) treatment of cell esds is used for estimating esds involving l.s. planes.

Data collection:

|            |                             |
|------------|-----------------------------|
| (akram4)   | Collect (Nonius B.V., 1998) |
| (ksenia2)  | Collect (Nonius B.V., 1998) |
| (ah621_cl) | ?                           |
| (jpd-f1)   | ?                           |

Cell refinement:

|            |                                  |
|------------|----------------------------------|
| (akram4)   | <i>DENZO</i> (Nonius B.V., 1998) |
| (ksenia2)  | <i>DENZO</i> (Nonius B.V., 1998) |
| (ah621_cl) | ?                                |
| (jpd-f1)   | ?                                |

Data reduction:

|            |                                  |
|------------|----------------------------------|
| (akram4)   | <i>DENZO</i> (Nonius B.V., 1998) |
| (ksenia2)  | <i>DENZO</i> (Nonius B.V., 1998) |
| (ah621_cl) | ?                                |
| (jpd-f1)   | ?                                |

Program(s) used to solve structure:

|            |                                   |
|------------|-----------------------------------|
| (akram4)   | <i>SHELXS97</i> (Sheldrick, 1997) |
| (ksenia2)  | <i>SHELXS97</i> (Sheldrick, 1997) |
| (ah621_cl) | <i>SHELXS97</i> (Sheldrick, 1990) |
| (jpd-f1)   | <i>SHELXS97</i> (Sheldrick, 1990) |

Program(s) used to refine structure:

|            |                                   |
|------------|-----------------------------------|
| (akram4)   | <i>SHELXL97</i> (Sheldrick, 1997) |
| (ksenia2)  | <i>SHELXL97</i> (Sheldrick, 1997) |
| (ah621_cl) | <i>SHELXL97</i> (Sheldrick, 1997) |
| (jpd-f1)   | <i>SHELXL97</i> (Sheldrick, 1997) |



## ***H. Computational Supplementary Material***

1. Geometry Optimizations with the BP/TZP method (all electrons on C, H, N, O; frozen core to 3d for Ru)

a) 3b

```
*****
*
* -----
* Amsterdam Density Functional (ADF)      2007.01   August 20, 2007
* -----
*                                     Build 200711141748
*
*
*          =====
*          |         |
*          |   A D F   |
*          |         |
*          =====
*
* Online information and documentation: http://www.scm.com
* E-mail: support@scm.com info@scm.com
*
* Scientific publications using ADF results must be properly referenced
* See the User Manuals (or the web site) for recommended citations
* The terms and conditions of the End User License Agreement apply to
* the use of ADF, http://www.scm.com/Sales/LicAgreement.html
*
***** pentium64_linux *****

ADF 2007.01 RunTime: Jul28-2008 16:12:30
terpRuOHax

=====
A T T A C H E D   F I L E S
=====

=====
M O D E L   P A R A M E T E R S
=====

DENSITY FUNCTIONAL POTENTIAL (scf)
LDA:
  Gradient Corrections:          VWN
                                Becke88 Perdew86          == Not Default ==

SPIN (restricted / unrestr.)
Molecule:                      Restricted
Fragments:                      Restricted

OTHER ASPECTS
Relativistic Corrections:      ---
Core Treatment:                Frozen Orbital(s)

Electric Field:                ---

Hyperfine or Zeeman Interaction: ---

Fragment File(s)
-----
Ru:
  file : t21.Ru
  jobid: ADF 2007.01 RunTime: Jul28-2008 16:12:29
  title: Ruthenium (TZP, 3d frozen)
Cl:
  file : t21.Cl
  jobid: ADF 2007.01 RunTime: Jul28-2008 16:12:28
  title: Chlorine (TZP)
O:
  file : t21.O
  jobid: ADF 2007.01 RunTime: Jul28-2008 16:12:28
  title: Oxygen (TZP)
H:
  file : t21.H
  jobid: ADF 2007.01 RunTime: Jul28-2008 16:12:27
  title: Hydrogen (TZP)
N:
  file : t21.N
  jobid: ADF 2007.01 RunTime: Jul28-2008 16:12:28
  title: Nitrogen (TZP)
C:
  file : t21.C
  jobid: ADF 2007.01 RunTime: Jul28-2008 16:12:28
  title: Carbon (TZP)

*****
*   R U N   T Y P E : GEOMETRY OPTIMIZATION
*****

=====
Geometry Convergence Tests
=====

Energy old :      -20.46856965
new :           -20.46855914

Convergence tests:
(Energies in hartree, Gradients in hartree/angstr or radian, Lengths in angstrom, Angles in degrees)

Item              Value              Criterion      Conv.          Ratio
-----
change in energy  0.00001051         0.00100000    YES            0.08103025
gradient max     0.00090484         0.00100000    YES            0.82872419
gradient rms     0.00014690         0.00066667    YES            0.81498129
cart. step max   0.00165474         0.01000000    YES            0.30080149
cart. step rms   0.00042344         0.00666667    YES            0.29463002

prediction dE :   -0.00000495
```

Electronic Supplementary Information for Dalton Transactions  
This journal is © The Royal Society of Chemistry 2009

\*\*\*\*\*  
Geometry CONVERGED  
\*\*\*\*\*

\*\*\*\*\*  
\* Final Geometry \*  
\*\*\*\*\*

Coordinates (Cartesian)  
=====

| Atom | bohr      |            |           | angstrom  |           |           | Geometric Variables<br>(0:frozen, *:LT par.) |     |     |
|------|-----------|------------|-----------|-----------|-----------|-----------|----------------------------------------------|-----|-----|
|      | X         | Y          | Z         | X         | Y         | Z         |                                              |     |     |
| 1 Ru | 15.918751 | -0.618087  | 12.757357 | 8.423840  | -0.327078 | 6.750903  | 1                                            | 2   | 3   |
| 2 Ru | 12.387478 | -3.057168  | 7.486613  | 6.555171  | -1.617784 | 3.961745  | 4                                            | 5   | 6   |
| 3 Cl | 14.096524 | -5.066311  | 11.667301 | 7.459559  | -2.680976 | 6.174070  | 7                                            | 8   | 9   |
| 4 O  | 14.433819 | 0.061705   | 9.046728  | 7.638048  | 0.032653  | 4.787322  | 10                                           | 11  | 12  |
| 5 H  | 13.515612 | 1.656206   | 8.969822  | 7.152154  | 0.876426  | 4.746625  | 13                                           | 14  | 15  |
| 6 O  | 17.971947 | -1.665824  | 18.043485 | 9.510345  | -0.881516 | 9.548201  | 16                                           | 17  | 18  |
| 7 O  | 21.243713 | -1.614151  | 10.775307 | 11.241689 | -0.854172 | 5.702047  | 19                                           | 20  | 21  |
| 8 O  | 7.174915  | -1.663692  | 9.509082  | 3.796802  | -0.880388 | 5.031990  | 22                                           | 23  | 24  |
| 9 O  | 9.874307  | -7.677417  | 5.117926  | 5.225258  | -4.062714 | 2.708290  | 25                                           | 26  | 27  |
| 10 N | 12.353661 | 0.689833   | 14.337747 | 6.537276  | 0.365044  | 7.587209  | 28                                           | 29  | 30  |
| 11 N | 15.907956 | -3.745356  | 5.470945  | 8.418128  | -1.981957 | 2.895100  | 31                                           | 32  | 33  |
| 12 C | 16.586924 | 3.22528    | 13.105028 | 8.777422  | 1.705288  | 6.934882  | 34                                           | 35  | 36  |
| 13 C | 18.815740 | 4.536422   | 12.523235 | 9.956861  | 2.400571  | 6.627011  | 37                                           | 38  | 39  |
| 14 H | 20.506176 | 3.507585   | 11.951814 | 10.851401 | 1.856134  | 6.324627  | 40                                           | 41  | 42  |
| 15 C | 18.930327 | 7.175199   | 12.648779 | 10.017497 | 3.796952  | 6.693446  | 43                                           | 44  | 45  |
| 16 H | 20.691962 | 8.142196   | 12.181649 | 10.949715 | 4.308665  | 6.446251  | 46                                           | 47  | 48  |
| 17 C | 16.802007 | 8.576082   | 13.363351 | 8.891239  | 4.538267  | 7.071581  | 49                                           | 50  | 51  |
| 18 H | 16.885253 | 10.633356  | 13.451981 | 8.935291  | 5.626929  | 7.118482  | 52                                           | 53  | 54  |
| 19 C | 14.573470 | 7.315731   | 13.967533 | 7.711948  | 3.871318  | 7.391300  | 55                                           | 56  | 57  |
| 20 H | 12.921508 | 8.413439   | 14.528863 | 6.837768  | 4.452200  | 7.688343  | 58                                           | 59  | 60  |
| 21 C | 14.446638 | 4.657010   | 13.862659 | 7.644832  | 2.464383  | 7.335803  | 61                                           | 62  | 63  |
| 22 C | 12.171265 | 3.248313   | 14.576226 | 6.440756  | 1.718933  | 7.713407  | 64                                           | 65  | 66  |
| 23 C | 9.932788  | 4.330198   | 15.504880 | 5.256205  | 2.291442  | 8.204829  | 67                                           | 68  | 69  |
| 24 H | 9.786206  | 6.378602   | 15.656954 | 5.178637  | 3.375411  | 8.285303  | 70                                           | 71  | 72  |
| 25 C | 7.923244  | 2.810627   | 16.251987 | 4.192800  | 1.487320  | 8.600181  | 73                                           | 74  | 75  |
| 26 C | 8.187650  | 0.158968   | 16.074071 | 4.332718  | 0.084122  | 8.506032  | 76                                           | 77  | 78  |
| 27 C | 10.428137 | -0.801057  | 15.090575 | 5.518332  | -0.423901 | 7.985589  | 79                                           | 80  | 81  |
| 28 H | 10.726211 | -2.825057  | 14.837428 | 5.676066  | -1.494956 | 7.851629  | 82                                           | 83  | 84  |
| 29 C | 5.448156  | 3.846597   | 17.277935 | 2.883040  | 2.035532  | 9.143090  | 85                                           | 86  | 87  |
| 30 H | 4.605997  | 5.136250   | 15.874745 | 2.437389  | 2.717986  | 8.400554  | 88                                           | 89  | 90  |
| 31 H | 5.820889  | 4.996683   | 18.973981 | 3.080282  | 2.644131  | 10.040598 | 91                                           | 92  | 93  |
| 32 C | 3.591363  | 1.688664   | 17.871385 | 1.900467  | 0.893602  | 9.457129  | 94                                           | 95  | 96  |
| 33 H | 1.771230  | 2.426928   | 18.550838 | 0.937295  | 1.284275  | 9.816681  | 97                                           | 98  | 99  |
| 34 C | 3.577372  | -0.201567  | 15.618629 | 1.893064  | -0.106665 | 8.265023  | 100                                          | 101 | 102 |
| 35 H | 3.836867  | 0.570186   | 13.710138 | 2.030383  | 0.301729  | 7.255093  | 103                                          | 104 | 105 |
| 36 H | 1.934944  | -1.460033  | 15.632325 | 1.023928  | -0.772616 | 8.272270  | 106                                          | 107 | 108 |
| 37 C | 5.960250  | -1.421792  | 16.873660 | 3.154028  | -0.752380 | 8.929156  | 109                                          | 110 | 111 |
| 38 H | 6.295324  | -3.456921  | 16.648680 | 3.331342  | -1.829324 | 8.810102  | 112                                          | 113 | 114 |
| 39 C | 4.889515  | -0.442642  | 19.498686 | 2.587420  | -0.234236 | 10.318260 | 115                                          | 116 | 117 |
| 40 C | 6.731307  | 0.317719   | 21.591036 | 3.562054  | 0.168130  | 11.425484 | 118                                          | 119 | 120 |
| 41 H | 5.704472  | 1.265743   | 23.135962 | 3.018677  | 0.669802  | 12.243024 | 121                                          | 122 | 123 |
| 42 H | 8.238408  | 1.592190   | 20.947736 | 4.359578  | 0.842551  | 11.085065 | 124                                          | 125 | 126 |
| 43 H | 7.645546  | -1.367865  | 22.400858 | 4.045848  | -0.723843 | 11.854024 | 127                                          | 128 | 129 |
| 44 C | 2.946089  | -2.291301  | 20.607614 | 1.559003  | -1.212505 | 10.905080 | 130                                          | 131 | 132 |
| 45 H | 3.906240  | -3.969816  | 21.374720 | 2.067093  | -2.100736 | 11.311015 | 133                                          | 134 | 135 |
| 46 H | 1.545049  | -2.942550  | 19.222913 | 0.817604  | -1.557130 | 10.172327 | 136                                          | 137 | 138 |
| 47 H | 1.914416  | -1.389489  | 22.174065 | 1.013065  | -0.735286 | 11.734010 | 139                                          | 140 | 141 |
| 48 C | 11.836049 | -0.935419  | 4.245515  | 6.263367  | -0.495003 | 2.246630  | 142                                          | 143 | 144 |
| 49 C | 9.687613  | 0.462653   | 3.569507  | 5.126464  | 0.244826  | 1.888902  | 145                                          | 146 | 147 |
| 50 H | 7.977460  | 6.360339   | 4.714419  | 4.221490  | 0.190683  | 2.494763  | 148                                          | 149 | 150 |
| 51 C | 9.678740  | 2.021883   | 1.430918  | 5.121769  | 1.069934  | 0.757209  | 151                                          | 152 | 153 |
| 52 H | 7.981600  | 3.095624   | 0.957594  | 4.223681  | 1.638133  | 0.506737  | 154                                          | 155 | 156 |
| 53 H | 11.833430 | 2.211370   | -0.091385 | 6.261981  | 1.170206  | -0.048359 | 157                                          | 158 | 159 |
| 54 H | 11.839447 | 3.438892   | -1.746899 | 6.265165  | 1.819783  | -0.924419 | 160                                          | 161 | 162 |
| 55 C | 13.975652 | 0.810404   | 0.523701  | 7.395596  | 0.428848  | 0.277130  | 163                                          | 164 | 165 |
| 56 H | 15.647497 | 0.961797   | -0.672677 | 8.280299  | 0.508961  | -0.355965 | 166                                          | 167 | 168 |
| 57 C | 13.995953 | -0.775643  | 2.661126  | 7.406339  | -0.410453 | 1.408207  | 169                                          | 170 | 171 |
| 58 C | 16.177642 | -2.345495  | 3.328846  | 8.560839  | -1.241182 | 1.761549  | 172                                          | 173 | 174 |
| 59 C | 18.413244 | -2.525759  | 1.909667  | 9.743869  | -1.336574 | 1.010552  | 175                                          | 176 | 177 |
| 60 H | 18.622272 | -1.394805  | 0.201355  | 9.854482  | -0.738099 | 0.106552  | 178                                          | 179 | 180 |
| 61 C | 20.345607 | -4.141246  | 2.657621  | 10.766474 | -2.191453 | 1.406352  | 181                                          | 182 | 183 |
| 62 C | 20.013564 | -5.595872  | 4.872316  | 10.590722 | -2.961208 | 2.578319  | 184                                          | 185 | 186 |
| 63 H | 17.765801 | -5.323908  | 6.208212  | 9.401257  | -2.817291 | 3.285244  | 187                                          | 188 | 189 |
| 64 C | 17.409286 | -6.356841  | 7.956254  | 9.212597  | -3.363895 | 4.210268  | 190                                          | 191 | 192 |
| 65 C | 22.806807 | -4.447974  | 1.207772  | 12.068843 | -2.353767 | 0.639125  | 193                                          | 194 | 195 |
| 66 H | 23.729459 | -2.590645  | 1.008166  | 12.557089 | -1.370910 | 0.533499  | 196                                          | 197 | 198 |
| 67 H | 22.399510 | -5.105547  | -0.726373 | 11.853310 | -2.701739 | -0.384380 | 199                                          | 200 | 201 |
| 68 C | 24.589876 | -6.292101  | 2.577815  | 13.012402 | -3.329637 | 1.364121  | 202                                          | 203 | 204 |
| 69 H | 26.405390 | -6.465354  | 1.580871  | 13.973131 | -3.421318 | 0.836561  | 205                                          | 206 | 207 |
| 70 C | 24.627173 | -5.623904  | 5.441742  | 13.032139 | -2.976042 | 2.879646  | 208                                          | 209 | 210 |
| 71 H | 26.238263 | -6.450960  | 6.442723  | 13.884691 | -3.413701 | 3.409342  | 211                                          | 212 | 213 |
| 72 H | 24.444344 | -3.624296  | 5.965408  | 12.935390 | -1.917895 | 3.156758  | 214                                          | 215 | 216 |
| 73 C | 22.178737 | -7.265016  | 5.662575  | 11.736482 | -3.845270 | 2.996505  | 217                                          | 218 | 219 |
| 74 H | 21.802114 | -8.292314  | 7.426508  | 11.537882 | -4.388104 | 3.929939  | 220                                          | 221 | 222 |
| 75 C | 23.192266 | -8.820715  | 3.307933  | 12.272818 | -4.667721 | 1.750483  | 223                                          | 224 | 225 |
| 76 C | 25.058527 | -10.889607 | 4.123591  | 13.260401 | -5.762003 | 2.182111  | 226                                          | 227 | 228 |
| 77 H | 24.040069 | -12.462740 | 5.025096  | 12.721456 | -6.594998 | 2.659166  | 229                                          | 230 | 231 |
| 78 H | 26.496457 | -10.218511 | 5.460692  | 14.021332 | -5.407403 | 2.889674  | 232                                          | 233 | 234 |
| 79 H | 26.049690 | -11.653898 | 2.461233  | 13.784902 | -6.166977 | 1.302428  | 235                                          | 236 | 237 |
| 80 C | 21.300172 | -9.969779  | 1.451551  | 11.271566 | -5.275780 | 0.768127  | 238                                          | 239 | 240 |
| 81 H | 22.294453 | -10.692155 | -0.230331 | 11.797716 | -5.658045 | -0.121886 | 241                                          | 242 | 243 |
| 82 H | 19.848511 | -8.603396  | 0.812772  | 10.503380 | -4.567009 | 0.430100  | 244                                          | 245 | 246 |
| 83 H | 20.316473 | -11.582169 | 2.327017  | 10.751014 | -6.129020 | 1.231404  | 247                                          | 248 | 249 |
| 84 C | 17.181151 | -1.276747  | 16.030476 | 9.091874  | -0.675626 | 8.482963  | 250                                          | 251 | 252 |
| 85 C | 19.176046 | -1.293875  | 11.447789 | 10.147527 | -0.684689 | 6.057909  | 253                                          | 254 | 255 |
| 86 C | 9.207833  | -2.179323  | 8.841469  | 4.872575  | -1.153248 | 4.678704  | 256                                          | 257 | 258 |
| 87 C | 10.862901 | -5.932710  | 6.016054  | 5.748400  | -3.139455 | 3.183559  | 259                                          | 260 | 261 |

Number of elements of the density matrix on this node (used, total): 206153 832695

Numerical Integration : Voronoi Polyhedra (Te Velde) \*\*\* (parameters, tests) \*\*\*

General Accuracy Parameter : 4.50  
Symmetry used in the points section: NOSYM

Summary of the Symmetry Unique Points:

|                                |               |
|--------------------------------|---------------|
| Nr. of used Symmetry Operators | 1             |
| Points in the Atomic Spheres   | 50260         |
| Points in the Atomic Polyhedra | 521244        |
| Points in the Outer Region     | 38933         |
| Total                          | 610437        |
| Sum of Weights                 | 183595.259189 |
| Total nr. of points:           | 610437        |
| Nr. of blocks:                 | 4770          |
| Block length:                  | 128           |
| Nr. of dummy points:           | 123           |

Test of Precision of the Numerical Integration Grid

Integral of the Total Core Density: 55.99998076397415  
Relative Error: -3.435E-07

BONDING ENERGY \*\*\* (decomposition) \*\*\*

\*\*\* WARNING \*\*\*

The bond energy is computed as an energy difference between molecule and fragments. In particular when the fragments are single atoms, they are usually computed as SPHERICALLY SYMMETRIC and SPIN-RESTRICTED. Obviously, this usually does NOT represent the true atomic groundstate.

To obtain the 'real' bond energy, (atomic) correction terms must be applied for the true (multiplet) fragment ground state. See ref: E.J.Baerends, V.Branchadell, M.Sodupe, Chem.Phys.Lett.265 (1997) 481

General theoretical background on the bond energy decomposition scheme used here (Morokuma-Ziegler) can be found in the review paper: F.M. Bickelhaupt and E.J. Baerends, "Kohn-Sham Density Functional Theory: Predicting and Understanding Chemistry" In: Rev. Comput. Chem.; Lipkowitz, K. B. and Boyd, D. B., Eds.; Wiley-VCH: New York, 2000, Vol. 15, 1-86.

Symbols used in the Bickelhaupt-Baerends (BB) paper are given below to make the direct connection to that paper, where detailed explanations can be found on the meaning of the various terms.

|                                                                            | hartree              | eV         | kcal/mol   | kJ/mol     |
|----------------------------------------------------------------------------|----------------------|------------|------------|------------|
| <b>Pauli Repulsion</b>                                                     |                      |            |            |            |
| Kinetic (Delta T <sup>0</sup> ):                                           | 221.571342234667668  | 6029.2630  | 139038.13  | 581735.48  |
| Delta V <sup>0</sup> Pauli Coulomb:                                        | -111.532789938814034 | -3034.9616 | -69987.89  | -292829.30 |
| Delta V <sup>0</sup> Pauli LDA-XC:                                         | -28.480996447973073  | -775.0073  | -17872.10  | -74776.85  |
| Delta V <sup>0</sup> Pauli GGA-Exchange:                                   | 1.672183251095404    | 45.5024    | 1049.31    | 4390.32    |
| Delta V <sup>0</sup> Pauli GGA-Correlation:                                | -0.470468378497849   | -12.8021   | -295.22    | -1235.21   |
| Total Pauli Repulsion:                                                     | 82.759270720478128   | 2251.9943  | 51932.23   | 217284.43  |
| (Total Pauli Repulsion =<br>Delta E <sup>0</sup> Pauli in BB paper)        |                      |            |            |            |
| <b>Steric Interaction</b>                                                  |                      |            |            |            |
| Pauli Repulsion (Delta E <sup>0</sup> Pauli):                              | 82.759270720478128   | 2251.9943  | 51932.23   | 217284.43  |
| Electrostatic Interaction:                                                 | -17.470990322308907  | -475.4098  | -10963.21  | -45870.08  |
| (Electrostatic Interaction =<br>Delta V <sub>elstat</sub> in the BB paper) |                      |            |            |            |
| Total Steric Interaction:                                                  | 65.288280398169221   | 1776.5845  | 40969.02   | 171414.36  |
| (Total Steric Interaction =<br>Delta E <sup>0</sup> in the BB paper)       |                      |            |            |            |
| <b>Orbital Interactions</b>                                                |                      |            |            |            |
| A:                                                                         | -85.742753210822642  | -2333.1790 | -53804.40  | -225117.57 |
| Total Orbital Interactions:                                                | -85.756852781072681  | -2333.5627 | -53813.24  | -225154.59 |
| <b>Alternative Decomposition Orb.Int.</b>                                  |                      |            |            |            |
| Kinetic:                                                                   | -202.361553266726247 | -5506.5380 | -126983.81 | -531300.18 |
| Coulomb:                                                                   | 107.681543735460380  | 2930.1639  | 67571.20   | 282717.85  |
| XC:                                                                        | 8.923156750193328    | 242.8114   | 5599.37    | 23427.74   |
| Total Orbital Interactions:                                                | -85.756852781072539  | -2333.5627 | -53813.24  | -225154.59 |
| Residu (E=Steric+OrbInt+Res):                                              | 0.000014331969659    | 0.0004     | 0.01       | 0.04       |
| Total Bonding Energy:                                                      | -20.468558050933801  | -556.9778  | -12844.22  | -53740.19  |

Summary of Bonding Energy (energy terms are taken from the energy decomposition above)

|                                 |                     |           |           |           |
|---------------------------------|---------------------|-----------|-----------|-----------|
| Electrostatic Energy:           | -17.470990322308907 | -475.4098 | -10963.21 | -45870.08 |
| Kinetic Energy:                 | 19.209788967941421  | 522.7250  | 12054.33  | 50435.29  |
| Coulomb (Steric+OrbInt) Energy: | -3.851231871383987  | -104.7974 | -2416.68  | -10111.41 |
| XC Energy:                      | -18.356124825182192 | -499.4956 | -11518.64 | -48194.00 |
| Total Bonding Energy:           | -20.468558050933666 | -556.9778 | -12844.22 | -53740.19 |

Correction terms (incorporated in energies above; only for test purposes):

1. Indication of fit-quality: 1st-order fit-correction used in the energy (hartree): -0.0061019483
2. Electrostatic (Fit correction): 0.0000000000

=====

B O N D - O R D E R A N A L Y S I S

=====

|    |    |   |    | DIST. [A] | BOND-ORDERS<br>(THRESHOLD = 0.050 ) |        |         |         |             |        |
|----|----|---|----|-----------|-------------------------------------|--------|---------|---------|-------------|--------|
|    |    |   |    |           | MAYER                               | G-J    | N-M (1) | N-M (2) | N-M (3) (*) |        |
| Ru | 1  | - | Cl | 3         | 2.6083                              | 0.4184 | 0.2577  | 0.3392  | 0.5799      | 0.3874 |
| Ru | 1  | - | O  | 4         | 2.1453                              | 0.3359 | 0.3126  | 0.3980  | 0.7798      | 0.4394 |
| Ru | 1  | - | O  | 6         | 3.0517                              | 0.2075 | 0.2496  | 0.2922  | 0.4166      | 0.2880 |
| Ru | 1  | - | O  | 7         | 3.0526                              | 0.2151 | 0.2456  | 0.2875  | 0.4143      | 0.2836 |
| Ru | 1  | - | N  | 10        | 2.1766                              | 0.2743 | 0.3258  | 0.3683  | 0.4917      | 0.3587 |
| Ru | 1  | - | C  | 12        | 2.0711                              | 0.6292 | 0.7450  | 0.8177  | 0.8662      | 0.7827 |
| Ru | 1  | - | C  | 84        | 1.8889                              | 1.1025 | 1.0860  | 1.1894  | 1.0303      | 1.0905 |
| Ru | 1  | - | C  | 85        | 1.8919                              | 1.0471 | 1.0672  | 1.1699  | 1.0077      | 1.0715 |
| Ru | 2  | - | Cl | 3         | 2.6159                              | 0.4130 | 0.2532  | 0.3327  | 0.5743      | 0.3802 |
| Ru | 2  | - | O  | 4         | 2.1397                              | 0.3552 | 0.3214  | 0.4085  | 0.7888      | 0.4511 |
| Ru | 2  | - | O  | 8         | 3.0492                              | 0.2198 | 0.2535  | 0.2963  | 0.4263      | 0.2927 |
| Ru | 2  | - | O  | 9         | 3.0525                              | 0.2062 | 0.2482  | 0.2901  | 0.4145      | 0.2859 |
| Ru | 2  | - | N  | 11        | 2.1774                              | 0.2615 | 0.3224  | 0.3637  | 0.4825      | 0.3538 |
| Ru | 2  | - | C  | 48        | 2.0706                              | 0.6390 | 0.7470  | 0.8181  | 0.8642      | 0.7827 |
| Ru | 2  | - | C  | 86        | 1.8870                              | 1.0869 | 1.0846  | 1.1856  | 1.0350      | 1.0889 |
| Ru | 2  | - | C  | 87        | 1.8900                              | 1.0949 | 1.0794  | 1.1801  | 1.0214      | 1.0820 |
| Cl | 3  | - | C  | 12        | 4.6427                              | 0.0519 | 0.1043  | 0.1283  | 0.0492      | 0.1563 |
| Cl | 3  | - | C  | 48        | 4.6513                              | 0.0516 | 0.1033  | 0.1270  | 0.0502      | 0.1546 |
| O  | 4  | - | H  | 5         | 0.9745                              | 1.1203 | 0.8506  | 1.0775  | 1.1654      | 1.0677 |
| O  | 4  | - | C  | 84        | 4.0340                              | 0.0556 | 0.1254  | 0.1484  | 0.2793      | 0.1697 |
| O  | 4  | - | C  | 87        | 4.0256                              | 0.0587 | 0.1279  | 0.1514  | 0.2818      | 0.1730 |
| O  | 6  | - | C  | 84        | 1.1629                              | 2.0422 | 2.1902  | 2.3687  | 2.3791      | 2.4126 |
| O  | 7  | - | C  | 85        | 1.1630                              | 2.0208 | 2.1882  | 2.3687  | 2.3797      | 2.4120 |
| O  | 8  | - | C  | 86        | 1.1647                              | 2.0086 | 2.1708  | 2.3487  | 2.3574      | 2.4007 |
| O  | 9  | - | C  | 87        | 1.1627                              | 2.0429 | 2.1909  | 2.3697  | 2.3801      | 2.4135 |
| N  | 10 | - | C  | 22        | 1.3632                              | 1.2762 | 1.3117  | 1.3794  | 1.3967      | 1.4035 |
| N  | 10 | - | C  | 25        | 2.7897                              | 0.0361 | 0.0896  | 0.0942  | 0.1042      | 0.0968 |
| N  | 10 | - | C  | 27        | 1.3488                              | 1.3551 | 1.3812  | 1.4596  | 1.4399      | 1.5131 |
| N  | 10 | - | C  | 85        | 4.0589                              | 0.0414 | 0.1144  | 0.1192  | 0.1663      | 0.1200 |
| N  | 11 | - | C  | 58        | 1.3616                              | 1.2802 | 1.3148  | 1.3820  | 1.4009      | 1.4029 |
| N  | 11 | - | C  | 61        | 2.7884                              | 0.0359 | 0.0907  | 0.0953  | 0.1048      | 0.0978 |
| N  | 11 | - | C  | 63        | 1.3478                              | 1.3575 | 1.3848  | 1.4628  | 1.4442      | 1.5147 |
| N  | 11 | - | C  | 86        | 4.0545                              | 0.0417 | 0.1142  | 0.1188  | 0.1598      | 0.1197 |
| C  | 12 | - | C  | 13        | 1.4033                              | 1.4118 | 1.4161  | 1.4516  | 1.4197      | 1.5064 |
| C  | 12 | - | C  | 17        | 2.8386                              | 0.0426 | 0.0995  | 0.1022  | 0.0767      | 0.1062 |
| C  | 12 | - | C  | 21        | 1.4212                              | 1.3473 | 1.3218  | 1.3515  | 1.3432      | 1.3801 |
| C  | 13 | - | H  | 14        | 1.0900                              | 1.0257 | 0.9217  | 0.9608  | 0.9732      | 0.9025 |
| C  | 13 | - | C  | 15        | 1.3993                              | 1.3953 | 1.4325  | 1.4883  | 1.4499      | 1.5486 |
| C  | 13 | - | C  | 19        | 2.7905                              | 0.0611 | 0.1094  | 0.1137  | 0.0837      | 0.1184 |
| C  | 15 | - | H  | 16        | 1.0918                              | 1.0311 | 0.9275  | 0.9692  | 0.9801      | 0.9074 |
| C  | 15 | - | C  | 17        | 1.4004                              | 1.3704 | 1.4075  | 1.4650  | 1.4244      | 1.5262 |
| C  | 15 | - | C  | 21        | 2.7961                              | 0.0534 | 0.0943  | 0.0977  | 0.0913      | 0.1000 |
| C  | 17 | - | H  | 18        | 1.0906                              | 1.0322 | 0.9288  | 0.9724  | 0.9860      | 0.9140 |
| C  | 17 | - | C  | 19        | 1.3920                              | 1.4125 | 1.4629  | 1.5231  | 1.4806      | 1.5878 |
| C  | 19 | - | H  | 20        | 1.0908                              | 1.0270 | 0.9268  | 0.9633  | 0.9749      | 0.9108 |
| C  | 19 | - | C  | 21        | 1.4096                              | 1.3405 | 1.3461  | 1.3954  | 1.3841      | 1.4301 |
| C  | 21 | - | C  | 22        | 1.4656                              | 1.1648 | 1.0937  | 1.1270  | 1.1294      | 1.1145 |
| C  | 22 | - | C  | 23        | 1.4044                              | 1.3598 | 1.3480  | 1.3947  | 1.4103      | 1.4053 |
| C  | 22 | - | C  | 24        | 2.7829                              | 0.0522 | 0.0844  | 0.0868  | 0.0873      | 0.0855 |
| C  | 23 | - | H  | 24        | 1.0897                              | 1.0136 | 0.9210  | 0.9605  | 0.9751      | 0.9056 |
| C  | 23 | - | C  | 25        | 1.3906                              | 1.4252 | 1.4419  | 1.4907  | 1.4923      | 1.5172 |
| C  | 23 | - | C  | 27        | 2.7368                              | 0.0563 | 0.0954  | 0.0992  | 0.0924      | 0.1019 |
| C  | 25 | - | C  | 26        | 1.4133                              | 1.3502 | 1.3093  | 1.3441  | 1.3440      | 1.3377 |
| C  | 25 | - | C  | 29        | 1.5201                              | 0.9402 | 1.0166  | 1.0521  | 1.0530      | 1.0877 |
| C  | 26 | - | C  | 27        | 1.3909                              | 1.4259 | 1.4082  | 1.4541  | 1.4537      | 1.4610 |
| C  | 26 | - | C  | 37        | 1.5060                              | 0.9721 | 1.0154  | 1.0432  | 1.0397      | 1.0624 |
| C  | 27 | - | H  | 28        | 1.0909                              | 1.0211 | 0.8994  | 0.9390  | 0.9294      | 0.8581 |
| C  | 29 | - | H  | 30        | 1.1026                              | 1.0135 | 0.9142  | 0.9566  | 0.9865      | 0.9126 |
| C  | 29 | - | H  | 31        | 1.1022                              | 1.0097 | 0.9148  | 0.9559  | 0.9851      | 0.9140 |
| C  | 29 | - | C  | 32        | 1.5389                              | 0.9551 | 1.0082  | 1.0429  | 0.9834      | 1.1011 |
| C  | 32 | - | H  | 33        | 1.0998                              | 1.0529 | 0.9246  | 0.9534  | 0.9612      | 0.9005 |
| C  | 32 | - | C  | 34        | 1.5562                              | 0.9377 | 0.9912  | 1.0220  | 0.9657      | 1.0775 |
| C  | 32 | - | C  | 39        | 1.5765                              | 0.9038 | 0.9453  | 0.9620  | 0.9676      | 0.9711 |
| C  | 34 | - | H  | 35        | 1.0980                              | 1.0207 | 0.9349  | 0.9724  | 0.9983      | 0.9328 |
| C  | 34 | - | H  | 36        | 1.0950                              | 1.0127 | 0.9327  | 0.9708  | 0.9970      | 0.9305 |
| C  | 34 | - | C  | 37        | 1.5646                              | 0.9268 | 0.9729  | 1.0045  | 0.9455      | 1.0601 |
| C  | 37 | - | H  | 38        | 1.0979                              | 1.0521 | 0.9226  | 0.9535  | 0.9623      | 0.8984 |
| C  | 37 | - | C  | 39        | 1.5872                              | 0.8957 | 0.9269  | 0.9446  | 0.9504      | 0.9545 |
| C  | 39 | - | C  | 40        | 1.5290                              | 0.9753 | 1.0172  | 1.0527  | 1.0501      | 1.1095 |
| C  | 39 | - | C  | 44        | 1.5359                              | 0.9969 | 1.0083  | 1.0427  | 1.0408      | 1.0982 |
| C  | 40 | - | H  | 41        | 1.1024                              | 0.9776 | 0.9440  | 0.9918  | 1.0295      | 0.9746 |
| C  | 40 | - | H  | 42        | 1.0985                              | 0.9776 | 0.9430  | 0.9899  | 1.0288      | 0.9710 |
| C  | 40 | - | H  | 43        | 1.1015                              | 0.9777 | 0.9425  | 0.9918  | 1.0318      | 0.9711 |
| C  | 44 | - | H  | 45        | 1.1009                              | 0.9784 | 0.9451  | 0.9931  | 1.0316      | 0.9733 |
| C  | 44 | - | H  | 46        | 1.0979                              | 0.9517 | 0.9477  | 0.9937  | 1.0297      | 0.9775 |
| C  | 44 | - | H  | 47        | 1.1013                              | 0.9765 | 0.9447  | 0.9923  | 1.0301      | 0.9735 |
| C  | 48 | - | C  | 49        | 1.4028                              | 1.4157 | 1.4222  | 1.4576  | 1.4251      | 1.5133 |
| C  | 48 | - | C  | 53        | 2.8355                              | 0.0429 | 0.1005  | 0.1032  | 0.0785      | 0.1071 |
| C  | 48 | - | C  | 57        | 1.4200                              | 1.3448 | 1.3202  | 1.3490  | 1.3428      | 1.3749 |
| C  | 49 | - | H  | 50        | 1.0904                              | 1.0254 | 0.9226  | 0.9613  | 0.9746      | 0.9052 |
| C  | 49 | - | C  | 51        | 1.4006                              | 1.3897 | 1.4265  | 1.4824  | 1.4416      | 1.5444 |
| C  | 49 | - | C  | 55        | 2.7894                              | 0.0601 | 0.1083  | 0.1125  | 0.0816      | 0.1173 |
| C  | 51 | - | H  | 52        | 1.0919                              | 1.0308 | 0.9279  | 0.9694  | 0.9807      | 0.9086 |
| C  | 51 | - | C  | 53        | 1.3997                              | 1.3772 | 1.4132  | 1.4709  | 1.4295      | 1.5329 |
| C  | 51 | - | C  | 57        | 2.7990                              | 0.0554 | 0.0961  | 0.0996  | 0.0950      | 0.1019 |
| C  | 53 | - | H  | 54        | 1.0906                              | 1.0320 | 0.9290  | 0.9725  | 0.9861      | 0.9144 |
| C  | 53 | - | C  | 55        | 1.3931                              | 1.4055 | 1.4573  | 1.5171  | 1.4753      | 1.5811 |
| C  | 55 | - | H  | 56        | 1.0908                              | 1.0272 | 0.9266  | 0.9632  | 0.9744      | 0.9102 |
| C  | 55 | - | C  | 57        | 1.4085                              | 1.3481 | 1.3521  | 1.4011  | 1.3921      | 1.4335 |
| C  | 57 | - | C  | 58        | 1.4655                              | 1.1578 | 1.0912  | 1.1242  | 1.1250      | 1.1087 |
| C  | 58 | - | C  | 59        | 1.4045                              | 1.3606 | 1.3478  | 1.3944  | 1.4113      | 1.4029 |
| C  | 58 | - | C  | 60        | 2.7832                              | 0.0538 | 0.0853  | 0.0876  | 0.0884      | 0.0862 |
| C  | 59 | - | H  | 62        | 1.0898                              | 1.0138 | 0.9212  | 0.9604  | 0.9747      | 0.9057 |
| C  | 59 | - | C  | 61        | 1.3904                              | 1.4247 | 1.4427  | 1.4914  | 1.4930      | 1.5175 |
| C  | 59 | - | C  | 63        | 2.7357                              | 0.0568 | 0.0964  | 0.1002  | 0.0934      | 0.1029 |
| C  | 61 | - | C  | 62        | 1.4131                              | 1.3518 | 1.3106  | 1.3456  | 1.3455      | 1.3394 |
| C  | 61 | - | C  | 65        | 1.5202                              | 0.9402 | 1.0164  | 1.0520  | 1.0527      | 1.0877 |
| C  | 62 | - | C  | 63        | 1.3911                              | 1.4256 | 1.4074  | 1.4534  | 1.4530      | 1.4606 |
| C  | 62 | - | C  | 73        | 1.5064                              | 0.9727 | 1.0151  | 1.0430  | 1.0393      | 1.0623 |
| C  | 63 | - | H  | 64        | 1.0909                              | 1.0210 | 0.9000  | 0.9396  | 0.9302      | 0.8592 |
| C  | 65 | - | H  | 66        | 1.1025                              | 1.0137 | 0.9147  | 0.9571  | 0.9868      | 0.9134 |
| C  | 65 | - | H  | 67        | 1.1023                              | 1.0099 | 0.9147  | 0.9557  | 0.9849      | 0.9140 |

Electronic Supplementary Information for Dalton Transactions  
This journal is © The Royal Society of Chemistry 2009

|   |        |    |        |        |        |        |        |        |
|---|--------|----|--------|--------|--------|--------|--------|--------|
| C | 65 - C | 68 | 1.5389 | 0.9554 | 1.0083 | 1.0429 | 0.9834 | 1.1012 |
| C | 68 - H | 69 | 1.0999 | 1.0529 | 0.9248 | 0.9534 | 0.9612 | 0.9007 |
| C | 68 - C | 70 | 1.5564 | 0.9373 | 0.9912 | 1.0219 | 0.9655 | 1.0775 |
| C | 68 - C | 75 | 1.5769 | 0.9039 | 0.9452 | 0.9618 | 0.9674 | 0.9709 |
| C | 70 - H | 71 | 1.0950 | 1.0127 | 0.9330 | 0.9710 | 0.9971 | 0.9309 |
| C | 70 - H | 72 | 1.0981 | 1.0208 | 0.9351 | 0.9728 | 0.9988 | 0.9332 |
| C | 70 - C | 73 | 1.5646 | 0.9278 | 0.9735 | 1.0050 | 0.9461 | 1.0606 |
| C | 73 - H | 74 | 1.0980 | 1.0520 | 0.9228 | 0.9535 | 0.9623 | 0.8987 |
| C | 73 - C | 75 | 1.5864 | 0.8956 | 0.9270 | 0.9446 | 0.9505 | 0.9545 |
| C | 75 - C | 76 | 1.5359 | 0.9964 | 1.0083 | 1.0426 | 1.0408 | 1.0981 |
| C | 75 - C | 80 | 1.5288 | 0.9753 | 1.0171 | 1.0526 | 1.0500 | 1.1095 |
| C | 76 - H | 77 | 1.1009 | 0.9785 | 0.9453 | 0.9931 | 1.0314 | 0.9735 |
| C | 76 - H | 78 | 1.0979 | 0.9517 | 0.9477 | 0.9937 | 1.0296 | 0.9776 |
| C | 76 - H | 79 | 1.1013 | 0.9765 | 0.9449 | 0.9923 | 1.0300 | 0.9737 |
| C | 80 - H | 81 | 1.1023 | 0.9776 | 0.9442 | 0.9920 | 1.0295 | 0.9749 |
| C | 80 - H | 82 | 1.0985 | 0.9580 | 0.9430 | 0.9900 | 1.0290 | 0.9709 |
| C | 80 - H | 83 | 1.1016 | 0.9777 | 0.9426 | 0.9918 | 1.0316 | 0.9713 |
| C | 84 - C | 85 | 2.6449 | 0.0714 | 0.0719 | 0.0724 | 0.0317 | 0.0684 |
| C | 86 - C | 87 | 2.6358 | 0.0734 | 0.0747 | 0.0752 | 0.0384 | 0.0713 |

Sum : 110.7742 111.5212 117.3547 117.3547 117.3547

Atomic summation :

|    |    |        |        |        |        |        |
|----|----|--------|--------|--------|--------|--------|
| Ru | 1  | 4.3448 | 4.5009 | 5.0982 | 5.1620 | 4.9228 |
| Ru | 2  | 4.3910 | 4.5177 | 5.1069 | 5.1713 | 4.9346 |
| Cl | 3  | 1.0794 | 0.9743 | 1.2480 | 1.3450 | 1.4613 |
| O  | 4  | 1.9806 | 1.9464 | 2.4374 | 2.6375 | 2.5999 |
| H  | 5  | 1.1444 | 0.8821 | 1.1134 | 1.0524 | 1.0970 |
| O  | 6  | 2.2865 | 2.5101 | 2.7420 | 2.7459 | 2.7894 |
| O  | 7  | 2.2776 | 2.5074 | 2.7399 | 2.7449 | 2.7862 |
| O  | 8  | 2.2737 | 2.5024 | 2.7339 | 2.7424 | 2.7892 |
| O  | 9  | 2.2864 | 2.5102 | 2.7418 | 2.7456 | 2.7893 |
| N  | 10 | 3.1856 | 3.4750 | 3.6899 | 3.6998 | 3.7723 |
| N  | 11 | 3.1896 | 3.4798 | 3.6928 | 3.7001 | 3.7704 |
| C  | 12 | 3.7506 | 3.9717 | 4.1473 | 4.1048 | 4.2342 |
| C  | 13 | 4.0327 | 3.9877 | 4.1297 | 4.1210 | 4.1909 |
| H  | 14 | 1.0693 | 0.9833 | 1.0258 | 1.0356 | 0.9624 |
| C  | 15 | 3.9765 | 3.9856 | 4.1511 | 4.1372 | 4.2144 |
| H  | 16 | 1.0397 | 0.9799 | 1.0240 | 1.0351 | 0.9579 |
| C  | 17 | 3.9606 | 3.9857 | 4.1545 | 4.1465 | 4.2254 |
| H  | 18 | 1.0426 | 0.9809 | 1.0270 | 1.0369 | 0.9641 |
| C  | 19 | 3.9574 | 3.9926 | 4.1511 | 4.1455 | 4.2050 |
| H  | 20 | 1.0357 | 0.9873 | 1.0263 | 1.0344 | 0.9691 |
| C  | 21 | 4.0441 | 4.0191 | 4.1441 | 4.1318 | 4.1952 |
| C  | 22 | 4.0872 | 4.0059 | 4.1636 | 4.1524 | 4.1810 |
| C  | 23 | 3.9476 | 3.9888 | 4.1358 | 4.1367 | 4.1254 |
| H  | 24 | 1.0489 | 0.9838 | 1.0262 | 1.0351 | 0.9660 |
| C  | 25 | 3.8914 | 4.0116 | 4.1410 | 4.1196 | 4.1940 |
| C  | 26 | 3.8965 | 4.0194 | 4.1388 | 4.1327 | 4.1545 |
| C  | 27 | 4.0013 | 3.9637 | 4.1426 | 4.1120 | 4.1289 |
| H  | 28 | 1.0783 | 0.9789 | 1.0262 | 1.0404 | 0.9421 |
| C  | 29 | 3.9113 | 3.9609 | 4.1193 | 4.1399 | 4.1305 |
| H  | 30 | 1.0858 | 0.9793 | 1.0244 | 1.0273 | 0.9743 |
| H  | 31 | 1.0871 | 0.9809 | 1.0248 | 1.0267 | 0.9777 |
| C  | 32 | 3.7968 | 3.9911 | 4.1060 | 4.0783 | 4.1731 |
| H  | 33 | 1.0918 | 0.9877 | 1.0187 | 1.0268 | 0.9611 |
| C  | 34 | 3.8642 | 3.9569 | 4.0998 | 4.1166 | 4.1341 |
| H  | 35 | 1.0753 | 0.9837 | 1.0232 | 1.0244 | 0.9792 |
| H  | 36 | 1.1049 | 0.9821 | 1.0222 | 1.0237 | 0.9778 |
| C  | 37 | 3.7963 | 3.9899 | 4.1034 | 4.0891 | 4.1319 |
| H  | 38 | 1.0940 | 0.9867 | 1.0200 | 1.0289 | 0.9598 |
| C  | 39 | 3.8525 | 4.0188 | 4.1261 | 4.0592 | 4.2521 |
| C  | 40 | 3.8764 | 3.9260 | 4.1095 | 4.1932 | 4.1137 |
| H  | 41 | 1.0795 | 0.9819 | 1.0311 | 1.0140 | 1.0107 |
| H  | 42 | 1.0637 | 0.9817 | 1.0303 | 1.0134 | 1.0085 |
| H  | 43 | 1.0814 | 0.9796 | 1.0303 | 1.0143 | 1.0063 |
| H  | 44 | 3.8831 | 3.9275 | 4.1074 | 4.1892 | 4.1121 |
| H  | 45 | 1.0775 | 0.9807 | 1.0300 | 1.0142 | 1.0070 |
| H  | 46 | 1.0788 | 0.9833 | 1.0308 | 1.0133 | 1.0120 |
| C  | 47 | 1.0771 | 0.9813 | 1.0302 | 1.0141 | 1.0082 |
| C  | 48 | 3.7574 | 3.9763 | 4.1487 | 4.1056 | 4.2326 |
| C  | 49 | 4.0309 | 3.9883 | 4.1298 | 4.1230 | 4.1960 |
| H  | 50 | 1.0675 | 0.9843 | 1.0263 | 1.0354 | 0.9652 |
| C  | 51 | 3.9754 | 3.9863 | 4.1519 | 4.1381 | 4.2185 |
| C  | 52 | 1.0401 | 0.9803 | 1.0242 | 1.0350 | 0.9590 |
| C  | 53 | 3.9600 | 3.9860 | 4.1544 | 4.1467 | 4.2258 |
| H  | 54 | 1.0423 | 0.9811 | 1.0270 | 1.0369 | 0.9645 |
| C  | 55 | 3.9626 | 3.9926 | 4.1505 | 4.1444 | 4.2009 |
| H  | 56 | 1.0346 | 0.9872 | 1.0262 | 1.0344 | 0.9685 |
| C  | 57 | 4.0455 | 4.0205 | 4.1439 | 4.1312 | 4.1869 |
| C  | 58 | 4.0919 | 4.0058 | 4.1624 | 4.1537 | 4.1715 |
| C  | 59 | 3.9517 | 3.9893 | 4.1358 | 4.1358 | 4.1228 |
| H  | 60 | 1.0481 | 0.9842 | 1.0262 | 1.0351 | 0.9661 |
| C  | 61 | 3.8885 | 4.0119 | 4.1411 | 4.1201 | 4.1941 |
| C  | 62 | 3.8984 | 4.0196 | 4.1394 | 4.1333 | 4.1557 |
| C  | 63 | 3.9959 | 3.9644 | 4.1426 | 4.1132 | 4.1281 |
| H  | 64 | 1.0767 | 0.9793 | 1.0265 | 1.0404 | 0.9429 |
| C  | 65 | 3.9122 | 3.9611 | 4.1192 | 4.1399 | 4.1309 |
| H  | 66 | 1.0851 | 0.9796 | 1.0245 | 1.0272 | 0.9747 |
| H  | 67 | 1.0865 | 0.9810 | 1.0248 | 1.0267 | 0.9779 |
| C  | 68 | 3.7962 | 3.9913 | 4.1059 | 4.0781 | 4.1733 |
| H  | 69 | 1.0915 | 0.9878 | 1.0187 | 1.0268 | 0.9614 |
| C  | 70 | 3.8639 | 3.9571 | 4.0998 | 4.1168 | 4.1345 |
| H  | 71 | 1.1045 | 0.9823 | 1.0223 | 1.0236 | 0.9781 |
| H  | 72 | 1.0776 | 0.9836 | 1.0231 | 1.0244 | 0.9791 |
| C  | 73 | 3.7983 | 3.9901 | 4.1034 | 4.0891 | 4.1323 |
| H  | 74 | 1.0937 | 0.9869 | 1.0201 | 1.0289 | 0.9602 |
| C  | 75 | 3.8517 | 4.0188 | 4.1261 | 4.0591 | 4.2520 |
| C  | 76 | 3.8822 | 3.9277 | 4.1072 | 4.1892 | 4.1124 |
| H  | 77 | 1.0772 | 0.9808 | 1.0300 | 1.0141 | 1.0073 |
| H  | 78 | 1.0785 | 0.9833 | 1.0308 | 1.0133 | 1.0121 |
| H  | 79 | 1.0767 | 0.9814 | 1.0302 | 1.0140 | 1.0084 |
| C  | 80 | 3.8770 | 3.9261 | 4.1095 | 4.1932 | 4.1139 |
| H  | 81 | 1.0789 | 0.9820 | 1.0312 | 1.0140 | 1.0109 |
| H  | 82 | 1.0640 | 0.9815 | 1.0302 | 1.0133 | 1.0082 |
| H  | 83 | 1.0814 | 0.9798 | 1.0303 | 1.0143 | 1.0066 |
| C  | 84 | 3.3718 | 3.6233 | 3.9383 | 3.8701 | 3.9045 |
| C  | 85 | 3.3289 | 3.5974 | 3.8993 | 3.8463 | 3.8492 |
| C  | 86 | 3.3593 | 3.6078 | 3.9059 | 3.8470 | 3.8671 |
| C  | 87 | 3.3663 | 3.6219 | 3.9348 | 3.8667 | 3.9021 |

(\*) Values from:  
- Mayer bond-order analysis  
- Gopinatan-Jug bond order analysis





|             |            |           |
|-------------|------------|-----------|
| 156.349597  | 22.199570  | 0.870000  |
| 162.834441  | 27.257053  | 1.112508  |
| 165.142497  | 1.833323   | 0.075888  |
| 174.736823  | 2.119925   | 0.092850  |
| 176.429159  | 3.010730   | 0.133144  |
| 177.726233  | 9.088202   | 0.404863  |
| 183.134807  | 110.708611 | 5.081950  |
| 183.926007  | 113.641914 | 5.239137  |
| 187.027525  | 8.105708   | 0.379992  |
| 200.523273  | 122.097600 | 6.136913  |
| 202.107642  | 20.159852  | 1.021288  |
| 212.200326  | 74.523724  | 3.963863  |
| 213.145745  | 140.431928 | 7.502752  |
| 229.239432  | 6.397654   | 0.367611  |
| 236.279868  | 1.095557   | 0.064884  |
| 240.362836  | 10.392106  | 0.626108  |
| 244.522075  | 82.225687  | 5.039688  |
| 250.636005  | 20.238886  | 1.271476  |
| 252.454744  | 57.514266  | 3.639462  |
| 266.508878  | 1.333630   | 0.089089  |
| 269.560203  | 3.382056   | 0.228515  |
| 294.143993  | 28.443640  | 2.097120  |
| 295.565901  | 41.990696  | 3.110896  |
| 335.734043  | 1.357204   | 0.114214  |
| 336.349742  | 4.660517   | 0.392919  |
| 352.158737  | 158.065710 | 13.952570 |
| 356.198218  | 6.270603   | 0.559860  |
| 358.091785  | 24.933163  | 2.237947  |
| 377.388959  | 2.728498   | 0.258102  |
| 377.477514  | 2.264688   | 0.214278  |
| 396.424087  | 0.623372   | 0.061942  |
| 397.304805  | 0.280087   | 0.027893  |
| 405.827822  | 25.840315  | 2.628559  |
| 406.240542  | 44.138312  | 4.494455  |
| 433.032094  | 85.853725  | 9.318742  |
| 434.779625  | 28.036466  | 3.055417  |
| 436.189087  | 17.931028  | 1.960460  |
| 441.088400  | 17.800629  | 1.968063  |
| 454.078801  | 507.754568 | 57.791389 |
| 454.816648  | 47.208816  | 5.381924  |
| 465.931928  | 44.561001  | 5.204218  |
| 469.225872  | 6.249614   | 0.735044  |
| 472.638721  | 26.761135  | 3.170384  |
| 479.964698  | 203.433495 | 24.474274 |
| 484.853311  | 15.826242  | 1.923385  |
| 485.110178  | 30.691232  | 3.731924  |
| 492.533490  | 20.836743  | 2.572431  |
| 497.494781  | 2.384204   | 0.297310  |
| 500.454097  | 30.736682  | 3.855665  |
| 502.879927  | 68.676183  | 8.656623  |
| 517.386648  | 25.366844  | 3.289726  |
| 518.669600  | 12.719219  | 1.653596  |
| 524.107363  | 124.107212 | 16.304044 |
| 529.566391  | 29.098467  | 3.862501  |
| 545.862048  | 23.400437  | 3.201732  |
| 547.058478  | 7.653876   | 1.049526  |
| 583.064540  | 35.831048  | 5.236658  |
| 587.638425  | 66.474847  | 9.791418  |
| 592.112775  | 43.742201  | 6.492069  |
| 595.341153  | 69.022585  | 10.299952 |
| 615.796651  | 21.655385  | 3.342576  |
| 616.857520  | 20.267830  | 3.133792  |
| 622.915828  | 54.695000  | 8.539945  |
| 623.707729  | 120.456812 | 18.831745 |
| 632.113247  | 9.853051   | 1.561147  |
| 632.626654  | 14.929617  | 2.367414  |
| 648.153498  | 0.691743   | 0.112383  |
| 648.235024  | 16.254696  | 2.641128  |
| 652.356970  | 13.751369  | 2.248585  |
| 652.838082  | 37.747821  | 6.176969  |
| 714.047390  | 223.696528 | 40.037260 |
| 714.965974  | 75.950502  | 13.611127 |
| 721.610903  | 15.779954  | 2.854216  |
| 721.652609  | 77.305544  | 13.983532 |
| 722.878947  | 28.675867  | 5.195893  |
| 723.479486  | 28.799386  | 5.222609  |
| 756.607444  | 43.283510  | 8.208639  |
| 756.998739  | 21.463221  | 4.072566  |
| 766.651781  | 23.149749  | 4.448591  |
| 766.994083  | 33.782884  | 6.494815  |
| 801.632967  | 0.765147   | 0.153744  |
| 801.984335  | 0.387491   | 0.077894  |
| 829.657744  | 13.910816  | 2.892875  |
| 829.822656  | 10.164879  | 2.114295  |
| 837.052163  | 0.983464   | 0.206343  |
| 837.351421  | 3.532785   | 0.741486  |
| 839.708910  | 10.491734  | 2.208280  |
| 840.273228  | 12.566474  | 2.646745  |
| 855.411733  | 10.779762  | 2.311333  |
| 856.440821  | 11.185452  | 2.401204  |
| 887.973514  | 21.519080  | 4.789628  |
| 888.313704  | 15.260846  | 3.397997  |
| 890.315397  | 64.075873  | 14.443905 |
| 900.494361  | 6.485493   | 1.463868  |
| 902.121224  | 151.396152 | 34.234013 |
| 914.873160  | 0.491946   | 0.112812  |
| 916.016161  | 1.208944   | 0.277580  |
| 919.587015  | 22.036400  | 5.079390  |
| 920.447584  | 1.446717   | 0.333780  |
| 922.091105  | 30.589889  | 7.070169  |
| 924.373453  | 40.071790  | 9.284623  |
| 933.108149  | 27.766483  | 6.494279  |
| 933.197211  | 14.223568  | 3.327056  |
| 938.735386  | 9.162915   | 2.156031  |
| 939.356215  | 0.078213   | 2.137513  |
| 951.675712  | 0.059637   | 0.014226  |
| 953.401033  | 0.088165   | 0.021069  |
| 984.086876  | 1.014654   | 0.250282  |
| 985.084230  | 0.943327   | 0.232924  |
| 1008.437587 | 136.792377 | 34.577134 |
| 1008.755623 | 61.996140  | 15.675763 |
| 1016.484348 | 87.518281  | 22.298597 |
| 1016.523469 | 9.200593   | 2.344290  |
| 1018.038886 | 25.596262  | 6.531591  |
| 1018.139086 | 3.107672   | 0.793086  |
| 1025.027037 | 27.376350  | 7.033783  |

|             |             |            |
|-------------|-------------|------------|
| 1026.113550 | 31.724280   | 8.159532   |
| 1051.438067 | 18.765346   | 4.945593   |
| 1053.028968 | 21.799301   | 5.753882   |
| 1064.486485 | 22.557190   | 6.018707   |
| 1064.588692 | 5.180483    | 1.382389   |
| 1085.887218 | 36.628916   | 9.969809   |
| 1086.233963 | 20.098615   | 5.472271   |
| 1111.807739 | 13.470285   | 3.753916   |
| 1112.025013 | 22.500076   | 6.271575   |
| 1114.713722 | 41.196125   | 11.510595  |
| 1114.957972 | 17.302404   | 4.835518   |
| 1137.188694 | 18.037743   | 5.141535   |
| 1137.600893 | 10.783350   | 3.074834   |
| 1158.058318 | 4.000612    | 1.161275   |
| 1158.524611 | 5.372726    | 1.560192   |
| 1164.413703 | 18.726652   | 5.465696   |
| 1164.572698 | 18.355128   | 5.357992   |
| 1179.157841 | 9.277415    | 2.742060   |
| 1179.334665 | 10.349515   | 3.059392   |
| 1184.403329 | 35.567388   | 10.559167  |
| 1184.730561 | 29.046540   | 8.625655   |
| 1201.811942 | 10.715710   | 3.228015   |
| 1201.989975 | 10.626534   | 3.201626   |
| 1207.486902 | 15.109505   | 4.573100   |
| 1207.649448 | 11.152492   | 3.375910   |
| 1228.913073 | 17.617380   | 5.426759   |
| 1229.874558 | 17.171798   | 5.293643   |
| 1243.671292 | 9.318460    | 2.904877   |
| 1244.441167 | 9.869175    | 3.078458   |
| 1250.562961 | 29.104913   | 9.123258   |
| 1250.645349 | 4.897862    | 1.535390   |
| 1259.773589 | 13.414798   | 4.235988   |
| 1259.974102 | 12.971656   | 4.096709   |
| 1275.032446 | 44.356646   | 14.176140  |
| 1275.911448 | 18.960157   | 6.063739   |
| 1288.778526 | 33.933897   | 10.962008  |
| 1289.727227 | 19.190574   | 6.203887   |
| 1296.762338 | 3.036646    | 0.987035   |
| 1297.608110 | 2.919521    | 0.949584   |
| 1307.518982 | 8.202293    | 2.688199   |
| 1308.347376 | 6.691357    | 2.194398   |
| 1326.647100 | 5.325274    | 1.770824   |
| 1326.733414 | 4.431122    | 1.473586   |
| 1353.626156 | 8.133696    | 2.759718   |
| 1354.333350 | 8.438969    | 2.864792   |
| 1372.320464 | 48.497910   | 16.682327  |
| 1372.925294 | 47.475520   | 16.337842  |
| 1387.545522 | 47.468344   | 16.509328  |
| 1387.683313 | 119.145671  | 41.442572  |
| 1417.895384 | 36.961489   | 13.136259  |
| 1420.600294 | 41.690649   | 14.845288  |
| 1422.287841 | 12.194692   | 4.347468   |
| 1422.328128 | 37.015836   | 13.196703  |
| 1434.650459 | 4.043408    | 1.454024   |
| 1434.929901 | 3.000091    | 1.079054   |
| 1437.779987 | 10.823620   | 3.900705   |
| 1439.094435 | 7.593579    | 2.739138   |
| 1440.645757 | 10.019428   | 3.618080   |
| 1441.207421 | 12.683799   | 4.581987   |
| 1449.047362 | 4.878808    | 1.772044   |
| 1449.278439 | 4.103449    | 1.490661   |
| 1461.821637 | 12.259410   | 4.492023   |
| 1462.061655 | 12.106225   | 4.436623   |
| 1465.477919 | 10.871642   | 3.993489   |
| 1465.568616 | 8.466272    | 3.110115   |
| 1476.774938 | 262.090714  | 97.016146  |
| 1478.236690 | 202.972253  | 75.207079  |
| 1526.509267 | 20.791344   | 7.955364   |
| 1528.048592 | 19.837870   | 7.598192   |
| 1546.779082 | 34.648573   | 13.433578  |
| 1548.560614 | 33.437073   | 12.978800  |
| 1568.362468 | 79.102356   | 31.096673  |
| 1569.513857 | 105.372023  | 41.454200  |
| 1597.255609 | 108.938751  | 43.614900  |
| 1598.409929 | 92.516874   | 37.066979  |
| 1937.394432 | 1194.395908 | 580.021944 |
| 1943.276848 | 1638.728041 | 798.214536 |
| 1999.026989 | 1753.803358 | 878.774862 |
| 2003.791102 | 827.605398  | 415.674926 |
| 2940.214017 | 21.803353   | 16.068683  |
| 2940.383706 | 20.807765   | 15.335838  |
| 2942.170534 | 26.601489   | 19.617870  |
| 2943.876268 | 24.251089   | 17.894884  |
| 2947.682863 | 92.394532   | 68.266101  |
| 2948.203716 | 90.368283   | 66.780796  |
| 2972.044348 | 10.649299   | 7.933309   |
| 2974.062547 | 9.346472    | 6.967482   |
| 2978.347238 | 101.597690  | 75.846795  |
| 2979.206845 | 84.132604   | 62.826528  |
| 2993.845713 | 34.363130   | 25.786963  |
| 2994.667502 | 34.304336   | 25.749909  |
| 2997.957456 | 9.608895    | 7.220662   |
| 2998.108074 | 8.618616    | 6.476836   |
| 3003.804359 | 16.684491   | 12.562113  |
| 3005.028730 | 19.114647   | 14.397686  |
| 3005.819624 | 48.137110   | 36.267782  |
| 3006.896458 | 41.644770   | 31.387520  |
| 3029.658511 | 25.029841   | 19.007712  |
| 3031.049850 | 22.907660   | 17.404113  |
| 3032.827747 | 29.703075   | 22.580171  |
| 3032.869708 | 28.825583   | 21.913408  |
| 3056.353472 | 51.904230   | 39.763482  |
| 3057.271164 | 48.722060   | 37.336850  |
| 3080.453377 | 1.325249    | 1.023270   |
| 3081.884568 | 1.666968    | 1.287721   |
| 3087.052130 | 9.987537    | 7.728237   |
| 3088.462658 | 10.442908   | 8.084290   |
| 3099.443415 | 47.585070   | 36.968557  |
| 3099.985759 | 10.017081   | 7.783572   |
| 3102.455814 | 9.306298    | 7.237035   |
| 3105.735994 | 8.165083    | 6.356283   |
| 3109.274187 | 2.547720    | 1.985586   |
| 3110.151327 | 4.101419    | 3.197376   |
| 3113.131995 | 47.937459   | 37.406805  |
| 3115.058341 | 46.805519   | 36.546124  |
| 3680.729947 | 26.598410   | 24.539613  |

=====  
 Statistical Thermal Analysis \*\*\* ideal gas assumed \*\*\*  
 =====

Pressure: 1.000000 atm.  
 Temperature: 298.150000 K

Moments of Inertia (and direction vectors)  
 =====

|  | 22243.3204 | 51376.5618 | 56209.8316 |
|--|------------|------------|------------|
|  | 0.6300     | 0.7761     | 0.0272     |
|  | -0.3538    | 0.2557     | 0.8997     |
|  | -0.6913    | 0.5765     | -0.4357    |

The rotational contribution to the molecular entropy includes a term, dependent on the symmetry number sigma. The results reported below were computed using sigma = 1, determined from the point group symmetry of the input geometry (NOSYM). If this is not the correct symmetry, please contact SCM to report a bug.

| Temp   |                                             | Transl | Rotat  | Vibrat  | Total   |
|--------|---------------------------------------------|--------|--------|---------|---------|
| 298.15 | Entropy (cal/mole-K):                       | 46.146 | 39.393 | 173.141 | 258.680 |
|        | Internal Energy (Kcal/mole):                | 0.889  | 0.889  | 440.084 | 441.861 |
|        | Constant Volume Heat Capacity (cal/mole-K): | 2.981  | 2.981  | 176.822 | 182.784 |

\*\*\*\*\*

=====  
 \*\*\* DONE CALCULATING ANALYTICAL SECOND DERIVATIVES OF THE ENERGY \*\*\*  
 =====

=====  
 SCAN POTENTIAL ENERGY SURFACE ALONG A RANGE OF NORMAL MODES \*\*\* with IR intensities \*\*\*  
 =====

RANGE OF FREQUENCIES: from -1000.000 to 0.000

=====  
 Vibration symmetry: \*\*\* A \*\*\*  
 =====

Total number of frequencies of this symmetry: 255

| Frequencies, cm <sup>-1</sup> : |          |          |          |          |          |          |          |
|---------------------------------|----------|----------|----------|----------|----------|----------|----------|
| -9.272                          | 12.164   | 17.532   | 24.275   | 28.804   | 35.366   | 37.963   | 51.243   |
| 54.756                          | 62.113   | 67.884   | 75.920   | 78.344   | 83.436   | 85.450   | 87.728   |
| 90.238                          | 90.789   | 98.067   | 104.942  | 111.919  | 127.931  | 131.431  | 156.350  |
| 162.834                         | 165.142  | 174.737  | 176.429  | 177.726  | 183.135  | 183.926  | 187.028  |
| 200.523                         | 202.108  | 212.200  | 213.146  | 229.239  | 236.280  | 240.363  | 244.522  |
| 250.636                         | 252.455  | 266.509  | 269.560  | 294.144  | 295.566  | 335.734  | 336.350  |
| 352.159                         | 356.198  | 358.092  | 377.389  | 377.478  | 396.424  | 397.305  | 405.828  |
| 406.241                         | 433.032  | 434.780  | 436.189  | 441.088  | 454.079  | 454.817  | 465.932  |
| 469.226                         | 472.639  | 479.965  | 484.853  | 485.110  | 492.533  | 497.495  | 500.454  |
| 502.880                         | 517.387  | 518.670  | 524.107  | 529.566  | 545.862  | 547.058  | 583.065  |
| 587.638                         | 592.113  | 595.341  | 615.797  | 616.858  | 622.916  | 623.708  | 632.113  |
| 632.627                         | 648.153  | 648.235  | 652.357  | 652.838  | 714.047  | 714.966  | 721.611  |
| 721.653                         | 722.879  | 723.479  | 756.607  | 756.999  | 766.652  | 766.994  | 801.633  |
| 801.984                         | 829.658  | 829.823  | 837.052  | 837.351  | 839.709  | 840.273  | 855.412  |
| 856.441                         | 887.974  | 888.314  | 899.315  | 900.494  | 902.121  | 914.873  | 916.016  |
| 919.587                         | 920.448  | 922.091  | 924.373  | 933.108  | 933.197  | 938.735  | 939.356  |
| 951.676                         | 953.401  | 984.087  | 985.084  | 1008.438 | 1008.756 | 1016.484 | 1016.523 |
| 1018.039                        | 1018.139 | 1025.027 | 1026.114 | 1051.438 | 1053.029 | 1064.486 | 1064.589 |
| 1085.887                        | 1086.234 | 1111.808 | 1112.025 | 1114.714 | 1114.958 | 1137.189 | 1137.601 |
| 1158.058                        | 1158.525 | 1164.414 | 1164.573 | 1179.158 | 1179.335 | 1184.403 | 1184.731 |
| 1201.812                        | 1201.990 | 1207.487 | 1207.649 | 1228.913 | 1229.875 | 1243.671 | 1244.441 |
| 1250.563                        | 1250.645 | 1259.774 | 1259.974 | 1275.032 | 1275.911 | 1288.779 | 1289.727 |
| 1296.762                        | 1297.608 | 1307.519 | 1308.347 | 1326.647 | 1326.733 | 1353.626 | 1354.333 |
| 1372.320                        | 1372.925 | 1387.546 | 1387.683 | 1417.895 | 1420.600 | 1422.288 | 1422.328 |
| 1434.650                        | 1434.930 | 1437.780 | 1439.094 | 1440.646 | 1441.207 | 1449.047 | 1449.278 |
| 1461.822                        | 1462.062 | 1465.478 | 1465.569 | 1476.775 | 1478.237 | 1526.509 | 1528.049 |
| 1546.779                        | 1548.561 | 1568.362 | 1569.514 | 1597.256 | 1598.410 | 1937.394 | 1943.277 |
| 1999.027                        | 2003.791 | 2940.214 | 2940.384 | 2942.171 | 2943.876 | 2947.683 | 2948.204 |
| 2972.044                        | 2974.063 | 2978.347 | 2979.207 | 2993.846 | 2994.668 | 2997.957 | 2998.108 |
| 3003.804                        | 3005.027 | 3005.820 | 3006.896 | 3029.659 | 3031.050 | 3032.828 | 3032.870 |
| 3056.353                        | 3057.271 | 3080.453 | 3081.885 | 3087.052 | 3088.463 | 3099.443 | 3099.986 |
| 3102.456                        | 3105.736 | 3109.274 | 3110.151 | 3113.132 | 3115.058 | 3680.730 |          |

Number of frequencies in the requested range: 1

1 \*\*\*\*\*

Scanning vibration frequency 1 A = -9.272

=====  
 Summary of a frequency scan in the requested range:  
 (One component per degenerate irreducible representations, degeneracy is not counted)

| Frequency, cm <sup>-1</sup> | Dipol moment derivatives (a.u.)               | IR Intensity |
|-----------------------------|-----------------------------------------------|--------------|
| Old                         | X Y Z                                         | km/mole      |
| Vibration symmetry: A       |                                               |              |
| -9.272                      | 16.025                                        | 0.015        |
| 12.164                      | not re-calculated (not in the required range) |              |
| 17.532                      | not re-calculated (not in the required range) |              |
| 24.275                      | not re-calculated (not in the required range) |              |

|         |                   |                             |
|---------|-------------------|-----------------------------|
| 28.804  | not re-calculated | (not in the required range) |
| 35.366  | not re-calculated | (not in the required range) |
| 37.963  | not re-calculated | (not in the required range) |
| 51.243  | not re-calculated | (not in the required range) |
| 54.756  | not re-calculated | (not in the required range) |
| 62.113  | not re-calculated | (not in the required range) |
| 67.884  | not re-calculated | (not in the required range) |
| 75.920  | not re-calculated | (not in the required range) |
| 78.344  | not re-calculated | (not in the required range) |
| 83.436  | not re-calculated | (not in the required range) |
| 85.450  | not re-calculated | (not in the required range) |
| 87.728  | not re-calculated | (not in the required range) |
| 90.238  | not re-calculated | (not in the required range) |
| 90.789  | not re-calculated | (not in the required range) |
| 98.067  | not re-calculated | (not in the required range) |
| 104.942 | not re-calculated | (not in the required range) |
| 111.919 | not re-calculated | (not in the required range) |
| 127.931 | not re-calculated | (not in the required range) |
| 131.431 | not re-calculated | (not in the required range) |
| 156.350 | not re-calculated | (not in the required range) |
| 162.834 | not re-calculated | (not in the required range) |
| 165.142 | not re-calculated | (not in the required range) |
| 174.737 | not re-calculated | (not in the required range) |
| 176.429 | not re-calculated | (not in the required range) |
| 177.726 | not re-calculated | (not in the required range) |
| 183.135 | not re-calculated | (not in the required range) |
| 183.926 | not re-calculated | (not in the required range) |
| 187.028 | not re-calculated | (not in the required range) |
| 200.523 | not re-calculated | (not in the required range) |
| 202.108 | not re-calculated | (not in the required range) |
| 212.200 | not re-calculated | (not in the required range) |
| 213.146 | not re-calculated | (not in the required range) |
| 229.239 | not re-calculated | (not in the required range) |
| 236.280 | not re-calculated | (not in the required range) |
| 240.363 | not re-calculated | (not in the required range) |
| 244.522 | not re-calculated | (not in the required range) |
| 250.636 | not re-calculated | (not in the required range) |
| 252.455 | not re-calculated | (not in the required range) |
| 266.509 | not re-calculated | (not in the required range) |
| 269.560 | not re-calculated | (not in the required range) |
| 294.144 | not re-calculated | (not in the required range) |
| 295.566 | not re-calculated | (not in the required range) |
| 335.734 | not re-calculated | (not in the required range) |
| 336.350 | not re-calculated | (not in the required range) |
| 352.159 | not re-calculated | (not in the required range) |
| 356.198 | not re-calculated | (not in the required range) |
| 358.092 | not re-calculated | (not in the required range) |
| 377.389 | not re-calculated | (not in the required range) |
| 377.478 | not re-calculated | (not in the required range) |
| 396.424 | not re-calculated | (not in the required range) |
| 397.305 | not re-calculated | (not in the required range) |
| 405.828 | not re-calculated | (not in the required range) |
| 406.241 | not re-calculated | (not in the required range) |
| 433.032 | not re-calculated | (not in the required range) |
| 434.780 | not re-calculated | (not in the required range) |
| 436.189 | not re-calculated | (not in the required range) |
| 441.088 | not re-calculated | (not in the required range) |
| 454.079 | not re-calculated | (not in the required range) |
| 454.817 | not re-calculated | (not in the required range) |
| 465.932 | not re-calculated | (not in the required range) |
| 469.226 | not re-calculated | (not in the required range) |
| 472.639 | not re-calculated | (not in the required range) |
| 479.965 | not re-calculated | (not in the required range) |
| 484.853 | not re-calculated | (not in the required range) |
| 485.110 | not re-calculated | (not in the required range) |
| 492.533 | not re-calculated | (not in the required range) |
| 497.495 | not re-calculated | (not in the required range) |
| 500.454 | not re-calculated | (not in the required range) |
| 502.880 | not re-calculated | (not in the required range) |
| 517.387 | not re-calculated | (not in the required range) |
| 518.670 | not re-calculated | (not in the required range) |
| 524.107 | not re-calculated | (not in the required range) |
| 529.566 | not re-calculated | (not in the required range) |
| 545.862 | not re-calculated | (not in the required range) |
| 547.058 | not re-calculated | (not in the required range) |
| 583.065 | not re-calculated | (not in the required range) |
| 587.638 | not re-calculated | (not in the required range) |
| 592.113 | not re-calculated | (not in the required range) |
| 595.341 | not re-calculated | (not in the required range) |
| 615.797 | not re-calculated | (not in the required range) |
| 616.858 | not re-calculated | (not in the required range) |
| 622.916 | not re-calculated | (not in the required range) |
| 623.708 | not re-calculated | (not in the required range) |
| 632.113 | not re-calculated | (not in the required range) |
| 632.627 | not re-calculated | (not in the required range) |
| 648.153 | not re-calculated | (not in the required range) |
| 648.235 | not re-calculated | (not in the required range) |
| 652.357 | not re-calculated | (not in the required range) |
| 652.838 | not re-calculated | (not in the required range) |
| 714.047 | not re-calculated | (not in the required range) |
| 714.966 | not re-calculated | (not in the required range) |
| 721.611 | not re-calculated | (not in the required range) |
| 721.653 | not re-calculated | (not in the required range) |
| 722.879 | not re-calculated | (not in the required range) |
| 723.479 | not re-calculated | (not in the required range) |
| 756.607 | not re-calculated | (not in the required range) |
| 756.999 | not re-calculated | (not in the required range) |
| 766.652 | not re-calculated | (not in the required range) |
| 766.994 | not re-calculated | (not in the required range) |
| 801.633 | not re-calculated | (not in the required range) |
| 801.984 | not re-calculated | (not in the required range) |
| 829.658 | not re-calculated | (not in the required range) |
| 829.823 | not re-calculated | (not in the required range) |
| 837.052 | not re-calculated | (not in the required range) |
| 837.351 | not re-calculated | (not in the required range) |
| 839.709 | not re-calculated | (not in the required range) |
| 840.273 | not re-calculated | (not in the required range) |
| 855.412 | not re-calculated | (not in the required range) |
| 856.441 | not re-calculated | (not in the required range) |
| 887.974 | not re-calculated | (not in the required range) |
| 888.314 | not re-calculated | (not in the required range) |
| 899.315 | not re-calculated | (not in the required range) |
| 900.494 | not re-calculated | (not in the required range) |
| 902.121 | not re-calculated | (not in the required range) |
| 914.873 | not re-calculated | (not in the required range) |
| 916.016 | not re-calculated | (not in the required range) |



|          |                   |                             |
|----------|-------------------|-----------------------------|
| 3029.659 | not re-calculated | (not in the required range) |
| 3031.050 | not re-calculated | (not in the required range) |
| 3032.828 | not re-calculated | (not in the required range) |
| 3032.870 | not re-calculated | (not in the required range) |
| 3056.353 | not re-calculated | (not in the required range) |
| 3057.271 | not re-calculated | (not in the required range) |
| 3080.453 | not re-calculated | (not in the required range) |
| 3081.885 | not re-calculated | (not in the required range) |
| 3087.052 | not re-calculated | (not in the required range) |
| 3088.463 | not re-calculated | (not in the required range) |
| 3099.443 | not re-calculated | (not in the required range) |
| 3099.986 | not re-calculated | (not in the required range) |
| 3102.456 | not re-calculated | (not in the required range) |
| 3105.736 | not re-calculated | (not in the required range) |
| 3109.274 | not re-calculated | (not in the required range) |
| 3110.151 | not re-calculated | (not in the required range) |
| 3113.132 | not re-calculated | (not in the required range) |
| 3115.058 | not re-calculated | (not in the required range) |
| 3680.730 | not re-calculated | (not in the required range) |

=====

=====  
No memory problems found  
=====

Maximum number of active allocate calls: 10109

\*\*\*\*\*

A D F E X I T

NORMAL TERMINATION

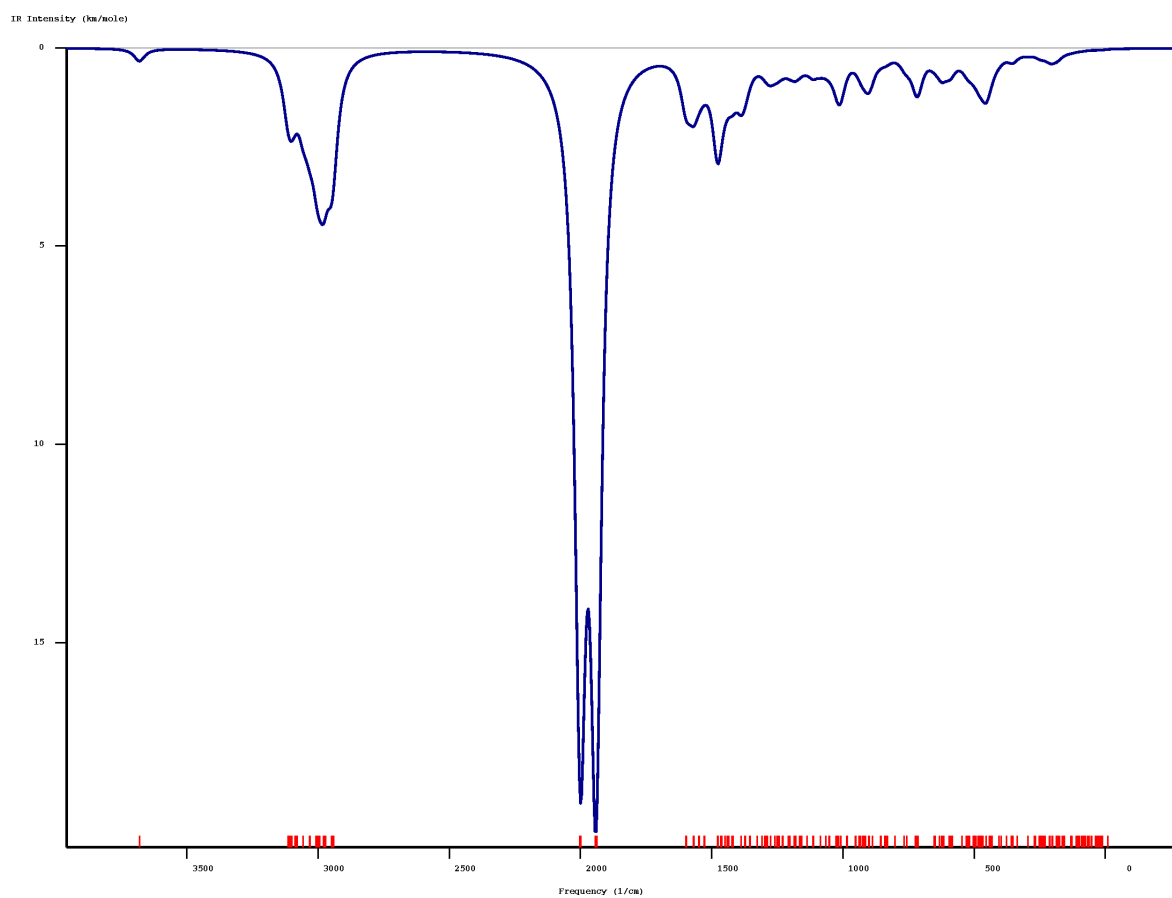



|      |           |           |            |
|------|-----------|-----------|------------|
| 2 Ru | 0.000473  | 0.000330  | -0.000008  |
| 3 Cl | -0.000081 | -0.000050 | -0.000011  |
| 4 O  | 0.000238  | -0.000095 | -0.0000275 |
| 5 H  | -0.000031 | 0.000105  | 0.000025   |
| 6 O  | 0.000687  | -0.000657 | -0.000542  |
| 7 O  | -0.000385 | 0.000262  | 0.000014   |
| 8 O  | 0.000188  | -0.000092 | -0.000060  |
| 9 O  | 0.000000  | -0.000018 | 0.000254   |
| 10 N | 0.000110  | -0.000141 | 0.000081   |
| 11 N | -0.000417 | 0.000014  | 0.000284   |
| 12 C | -0.000093 | -0.000030 | -0.000133  |
| 13 C | 0.000045  | -0.000014 | -0.000305  |
| 14 H | -0.000068 | 0.000025  | 0.000084   |
| 15 C | -0.000121 | 0.000178  | 0.000033   |
| 16 H | -0.000028 | 0.000024  | 0.000005   |
| 17 C | 0.000140  | -0.000156 | -0.000098  |
| 18 H | 0.000028  | 0.000093  | 0.000034   |
| 19 C | 0.000010  | -0.000028 | 0.000007   |
| 20 H | 0.000077  | -0.000029 | -0.000021  |
| 21 C | -0.000027 | 0.000015  | 0.000122   |
| 22 C | -0.000047 | 0.000231  | -0.000405  |
| 23 C | 0.000123  | -0.000035 | 0.000249   |
| 24 H | 0.000058  | -0.000027 | -0.000007  |
| 25 C | 0.000040  | 0.000045  | -0.000009  |
| 26 C | 0.000059  | -0.000060 | 0.000052   |
| 27 C | -0.000261 | 0.000142  | -0.000048  |
| 28 H | -0.000016 | -0.000087 | 0.000004   |
| 29 C | 0.000041  | -0.000023 | 0.000014   |
| 30 H | 0.000067  | -0.000025 | -0.000035  |
| 31 H | 0.000041  | -0.000065 | -0.000046  |
| 32 C | 0.000010  | -0.000110 | 0.000001   |
| 33 H | -0.000052 | 0.000013  | 0.000009   |
| 34 C | 0.000023  | -0.000006 | 0.000048   |
| 35 H | 0.000019  | 0.000006  | -0.000006  |
| 36 H | -0.000018 | 0.000007  | -0.000029  |
| 37 C | 0.000031  | -0.000047 | -0.000141  |
| 38 H | -0.000046 | 0.000020  | 0.000031   |
| 39 C | -0.000003 | 0.000027  | 0.000052   |
| 40 C | -0.000042 | -0.000184 | -0.000011  |
| 41 H | -0.000020 | 0.000022  | 0.000001   |
| 42 H | 0.000007  | 0.000028  | -0.000005  |
| 43 H | -0.000010 | 0.000004  | 0.000004   |
| 44 C | -0.000050 | 0.000045  | -0.000072  |
| 45 H | 0.000034  | -0.000018 | -0.000007  |
| 46 H | 0.000064  | 0.000035  | 0.000103   |
| 47 H | -0.000032 | 0.000014  | 0.000018   |
| 48 C | 0.000272  | -0.000007 | 0.000144   |
| 49 C | -0.000055 | -0.000065 | -0.000049  |
| 50 H | -0.000147 | -0.000047 | 0.000164   |
| 51 C | -0.000035 | 0.000075  | -0.000049  |
| 52 H | 0.000059  | -0.000028 | -0.000007  |
| 53 C | 0.000038  | 0.000111  | 0.000073   |
| 54 H | -0.000015 | 0.000050  | -0.000115  |
| 55 C | -0.000121 | -0.000016 | -0.000141  |
| 56 H | 0.000057  | 0.000013  | -0.000056  |
| 57 C | 0.000025  | -0.000046 | 0.000106   |
| 58 C | 0.000009  | -0.000021 | -0.000114  |
| 59 C | -0.000053 | 0.000093  | -0.000032  |
| 60 H | -0.000024 | -0.000003 | 0.000028   |
| 61 C | -0.000061 | 0.000066  | -0.000066  |
| 62 C | -0.000150 | 0.000034  | 0.000070   |
| 63 C | 0.000256  | -0.000057 | -0.000115  |
| 64 H | -0.000006 | -0.000100 | 0.000152   |
| 65 C | -0.000135 | -0.000125 | -0.000016  |
| 66 H | 0.000076  | 0.000264  | -0.000024  |
| 67 H | -0.000082 | -0.000024 | -0.000025  |
| 68 C | 0.000036  | 0.000000  | 0.000134   |
| 69 H | 0.000135  | -0.000017 | -0.000022  |
| 70 C | 0.000003  | -0.000023 | -0.000120  |
| 71 H | 0.000224  | -0.000066 | 0.000121   |
| 72 H | -0.000021 | 0.000186  | 0.000043   |
| 73 C | 0.000005  | -0.000028 | 0.000010   |
| 74 H | 0.000012  | -0.000056 | 0.000052   |
| 75 C | -0.000100 | -0.000111 | -0.000038  |
| 76 C | 0.000088  | 0.000011  | -0.000150  |
| 77 H | -0.000107 | -0.000237 | 0.000100   |
| 78 H | 0.000214  | 0.000109  | 0.000165   |
| 79 H | 0.000042  | -0.000029 | 0.000000   |
| 80 C | 0.000066  | -0.000112 | -0.000005  |
| 81 H | 0.000025  | -0.000006 | 0.000005   |
| 82 H | -0.000168 | 0.000099  | -0.000090  |
| 83 H | -0.000034 | -0.000093 | 0.000016   |
| 84 C | -0.000777 | 0.000818  | 0.000967   |
| 85 C | 0.000526  | -0.000216 | 0.000060   |
| 86 C | -0.000479 | -0.000029 | 0.000220   |
| 87 C | -0.000095 | -0.000071 | -0.000709  |

-----  
 Geometry Convergence after Step 73

|                          |            |                      |   |
|--------------------------|------------|----------------------|---|
| current energy           |            | -20.65508147 Hartree |   |
| abs of energy change     | 0.00000253 | 0.00100000           | T |
| constrained gradient max | 0.00096743 | 0.00100000           | T |
| constrained gradient rms | 0.00017023 | 0.00066667           | T |
| gradient max             | 0.00096743 |                      |   |
| gradient rms             | 0.00017023 |                      |   |
| cart. step max           | 0.00943708 | 0.01000000           | T |
| cart. step rms           | 0.00298585 | 0.00666667           | T |

Number of elements of the density matrix on this node (used, total): 103723 832695

-----  
 Numerical Integration : Voronoi Polyhedra (Te Velde) \*\*\* (parameters, tests) \*\*\*  
 -----

General Accuracy Parameter : 4.50

Symmetry used in the points section: NOSYM

Summary of the Symmetry Unique Points:  
 -----



Electronic Supplementary Information for Dalton Transactions  
This journal is © The Royal Society of Chemistry 2009

```

Nr. of used Symmetry Operators          1
Points in the Atomic Spheres            50352
Points in the Atomic Polyhedra          518533
Points in the Outer Region              40485
-----
Total                                   609370

Sum of Weights                          181366.739456

Total nr. of points:                    609370
Nr. of blocks:                          4761
Block length:                            128
Nr. of dummy points:                    38
  
```

Test of Precision of the Numerical Integration Grid

```

Integral of the Total Core Density:      55.99998079030989
Relative Error:                          -3.430E-07
  
```

BONDING ENERGY \*\*\* (decomposition) \*\*\*

\*\*\* WARNING \*\*\*

The bond energy is computed as an energy difference between molecule and fragments. In particular when the fragments are single atoms, they are usually computed as SPHERICALLY SYMMETRIC and SPIN-RESTRICTED. Obviously, this usually does NOT represent the true atomic groundstate.

To obtain the 'real' bond energy, (atomic) correction terms must be applied for the true (multiplet) fragment ground state. See ref: E.J.Baerends, V.Branchadell, M.Sodupe, Chem.Phys.Lett.265 (1997) 481

General theoretical background on the bond energy decomposition scheme used here (Morokuma-Ziegler) can be found in the review paper: F.M. Bickelhaupt and E.J. Baerends, "Kohn-Sham Density Functional Theory: Predicting and Understanding Chemistry" In: Rev. Comput. Chem.; Lipkowitz, K. B. and Boyd, D. E., Eds.; Wiley-VCH: New York, 2000, Vol. 15, 1-86.

Symbols used in the Bickelhaupt-Baerends (BB) paper are given below to make the direct connection to that paper, where detailed explanations can be found on the meaning of the various terms.

|                                                                            | hartree              | eV         | kcal/mol   | kJ/mol     |
|----------------------------------------------------------------------------|----------------------|------------|------------|------------|
| <b>Pauli Repulsion</b>                                                     |                      |            |            |            |
| Kinetic (Delta T <sup>0</sup> ):                                           | 222.271856062742586  | 6048.3249  | 139477.71  | 583574.68  |
| Delta V <sup>0</sup> Pauli Coulomb:                                        | -111.946494475783794 | -3046.2191 | -70247.49  | -293915.48 |
| Delta V <sup>0</sup> Pauli LDA-XC:                                         | -28.591633922268176  | -778.0179  | -17941.52  | -75067.32  |
| Delta V <sup>0</sup> Pauli GGA-Exchange:                                   | 1.684172307550909    | 45.8287    | 1056.83    | 4421.79    |
| Delta V <sup>0</sup> Pauli GGA-Correlation:                                | -0.475508393942048   | -12.9392   | -298.39    | -1248.45   |
| Total Pauli Repulsion:                                                     | 82.942391578299478   | 2256.9773  | 52047.14   | 217765.22  |
| (Total Pauli Repulsion =<br>Delta E <sup>0</sup> Pauli in BB paper)        |                      |            |            |            |
| <b>Steric Interaction</b>                                                  |                      |            |            |            |
| Pauli Repulsion (Delta E <sup>0</sup> Pauli):                              | 82.942391578299478   | 2256.9773  | 52047.14   | 217765.22  |
| Electrostatic Interaction:                                                 | -17.530146091982104  | -477.0195  | -11000.33  | -46025.39  |
| (Electrostatic Interaction =<br>Delta V <sub>elstat</sub> in the BB paper) |                      |            |            |            |
| Total Steric Interaction:                                                  | 65.412245486317374   | 1779.9578  | 41046.81   | 171739.83  |
| (Total Steric Interaction =<br>Delta E <sup>0</sup> in the BB paper)       |                      |            |            |            |
| <b>Orbital Interactions</b>                                                |                      |            |            |            |
| A:                                                                         | -85.862735657089331  | -2336.4439 | -53879.69  | -225432.58 |
| Total Orbital Interactions:                                                | -85.876664828438763  | -2336.8229 | -53888.43  | -225469.15 |
| <b>Alternative Decomposition Orb.Int.</b>                                  |                      |            |            |            |
| Kinetic:                                                                   | -202.912177491442890 | -5521.5213 | -127329.33 | -532745.85 |
| Coulomb:                                                                   | 108.043900495647335  | 2940.0241  | 67798.58   | 283669.22  |
| XC:                                                                        | 8.991612167356756    | 244.6742   | 5642.32    | 23607.47   |
| Total Orbital Interactions:                                                | -85.876664828438805  | -2336.8229 | -53888.43  | -225469.15 |
| Residu (E=Steric+OrbInt+Res):                                              | -0.000009063547154   | -0.0002    | -0.01      | -0.02      |
| Dispersion Energy:                                                         | -0.190652961839779   | -5.1879    | -119.64    | -500.56    |
| Total Bonding Energy:                                                      | -20.655081367508320  | -562.0534  | -12961.26  | -54229.91  |

Summary of Bonding Energy (energy terms are taken from the energy decomposition above)

|                                 |                     |           |           |           |
|---------------------------------|---------------------|-----------|-----------|-----------|
| Electrostatic Energy:           | -17.530146091982104 | -477.0195 | -11000.33 | -46025.39 |
| Kinetic Energy:                 | 19.359678571299696  | 526.8037  | 12148.38  | 50828.83  |
| Coulomb (Steric+OrbInt) Energy: | -3.902603043683612  | -106.1952 | -2448.92  | -10246.28 |
| XC Energy:                      | -18.391357841302558 | -500.4543 | -11540.75 | -48286.50 |
| Dispersion Energy:              | -0.190652961839779  | -5.1879   | -119.64   | -500.56   |
| Total Bonding Energy:           | -20.655081367508355 | -562.0534 | -12961.26 | -54229.91 |

Correction terms (incorporated in energies above; only for test purposes):

1. Indication of fit-quality: 1st-order fit-correction used in the energy (hartree): -0.0062875884
2. Electrostatic (Fit correction): 0.0000000000

FRAGMENT ENERGY TERMS \*\*\* (summed over all fragments) \*\*\*

Electronic Supplementary Information for Dalton Transactions  
This journal is © The Royal Society of Chemistry 2009

The energy terms below are (parts of) the Total Energy of the fragments from which the molecule is built.

|                          |                      |             |            |             |
|--------------------------|----------------------|-------------|------------|-------------|
| Exchange and Correlation |                      |             |            |             |
| Exchange LDA:            | -500.305123445726906 | -13613.9951 | -313946.24 | -1313550.92 |
| Exchange GGA:            | -45.517734575151451  | -1238.6006  | -28562.81  | -119506.80  |
| Correlation LDA:         | -29.628750107805942  | -806.2393   | -18592.32  | -77790.27   |
| Correlation GGA:         | 14.279219285336403   | 388.5573    | 8960.35    | 37490.08    |
| Total XC:                | -561.172388843347903 | -15270.2777 | -352141.03 | -1473357.90 |

=====

BOND - ORDER ANALYSIS

=====

|    |    |      | DIST. [A] | BOND-ORDERS<br>(THRESHOLD = 0.050 ) |        |         |         |             |        |
|----|----|------|-----------|-------------------------------------|--------|---------|---------|-------------|--------|
|    |    |      |           | MAYER                               | G-J    | N-M (1) | N-M (2) | N-M (3) (*) |        |
| Ru | 1  | - Cl | 3         | 2.5873                              | 0.4256 | 0.2605  | 0.3407  | 0.5776      | 0.3872 |
| Ru | 1  | - O  | 4         | 2.1330                              | 0.3393 | 0.3182  | 0.4034  | 0.7795      | 0.4441 |
| Ru | 1  | - O  | 6         | 3.0535                              | 0.2047 | 0.2465  | 0.2885  | 0.4121      | 0.2843 |
| Ru | 1  | - O  | 7         | 3.0515                              | 0.2149 | 0.2458  | 0.2876  | 0.4160      | 0.2839 |
| Ru | 1  | - N  | 10        | 2.1676                              | 0.2746 | 0.3295  | 0.3723  | 0.4954      | 0.3626 |
| Ru | 1  | - C  | 12        | 2.0701                              | 0.6171 | 0.7406  | 0.8129  | 0.8612      | 0.7780 |
| Ru | 1  | - C  | 84        | 1.8911                              | 1.0880 | 1.0775  | 1.1804  | 1.0216      | 1.0822 |
| Ru | 1  | - C  | 85        | 1.8905                              | 1.0451 | 1.0715  | 1.1741  | 1.0170      | 1.0766 |
| Ru | 2  | - Cl | 3         | 2.5950                              | 0.4195 | 0.2553  | 0.3334  | 0.5706      | 0.3791 |
| Ru | 2  | - O  | 4         | 2.1295                              | 0.3582 | 0.3257  | 0.4122  | 0.7861      | 0.4540 |
| Ru | 2  | - O  | 8         | 3.0478                              | 0.2200 | 0.2543  | 0.2972  | 0.4285      | 0.2937 |
| Ru | 2  | - O  | 9         | 3.0536                              | 0.2042 | 0.2448  | 0.2860  | 0.4089      | 0.2818 |
| Ru | 2  | - N  | 11        | 2.1734                              | 0.2679 | 0.3243  | 0.3656  | 0.4831      | 0.3556 |
| Ru | 2  | - C  | 48        | 2.0705                              | 0.6293 | 0.7422  | 0.8130  | 0.8591      | 0.7779 |
| Ru | 2  | - C  | 86        | 1.8855                              | 1.0864 | 1.0911  | 1.1924  | 1.0472      | 1.0965 |
| Ru | 2  | - C  | 87        | 1.8914                              | 1.0836 | 1.0708  | 1.1711  | 1.0116      | 1.0735 |
| Cl | 3  | - C  | 12        | 4.6281                              | 0.0535 | 0.1067  | 0.1303  | 0.0530      | 0.1580 |
| Cl | 3  | - C  | 48        | 4.6400                              | 0.0530 | 0.1054  | 0.1287  | 0.0535      | 0.1560 |
| O  | 4  | - H  | 5         | 0.9755                              | 1.1174 | 0.8494  | 1.0713  | 1.1599      | 1.0580 |
| O  | 4  | - C  | 84        | 4.0230                              | 0.0559 | 0.1260  | 0.1486  | 0.2780      | 0.1693 |
| O  | 4  | - C  | 87        | 4.0125                              | 0.0584 | 0.1277  | 0.1506  | 0.2816      | 0.1716 |
| O  | 6  | - C  | 84        | 1.1623                              | 2.0462 | 2.1940  | 2.3734  | 2.3838      | 2.4165 |
| O  | 7  | - C  | 85        | 1.1637                              | 2.0119 | 2.1761  | 2.3537  | 2.3639      | 2.4006 |
| O  | 8  | - C  | 86        | 1.1655                              | 1.9987 | 2.1589  | 2.3345  | 2.3422      | 2.3900 |
| O  | 9  | - C  | 87        | 1.1621                              | 2.0473 | 2.1963  | 2.3758  | 2.3864      | 2.4177 |
| N  | 10 | - C  | 22        | 1.3645                              | 1.2749 | 1.3086  | 1.3757  | 1.3927      | 1.4001 |
| N  | 10 | - C  | 25        | 2.7860                              | 0.0360 | 0.0891  | 0.0936  | 0.1035      | 0.0962 |
| N  | 10 | - C  | 27        | 1.3477                              | 1.3541 | 1.3799  | 1.4577  | 1.4384      | 1.5109 |
| N  | 10 | - C  | 85        | 4.0472                              | 0.0411 | 0.1146  | 0.1193  | 0.1644      | 0.1202 |
| N  | 11 | - C  | 58        | 1.3626                              | 1.2785 | 1.3129  | 1.3795  | 1.3985      | 1.3999 |
| N  | 11 | - C  | 61        | 2.7853                              | 0.0361 | 0.0906  | 0.0952  | 0.1046      | 0.0977 |
| N  | 11 | - C  | 63        | 1.3469                              | 1.3556 | 1.3843  | 1.4616  | 1.4434      | 1.5129 |
| N  | 11 | - C  | 86        | 4.0473                              | 0.0418 | 0.1143  | 0.1189  | 0.1578      | 0.1199 |
| C  | 12 | - C  | 13        | 1.4027                              | 1.4107 | 1.4168  | 1.4525  | 1.4208      | 1.5071 |
| C  | 12 | - C  | 17        | 2.8370                              | 0.0427 | 0.0994  | 0.1021  | 0.0767      | 0.1061 |
| C  | 12 | - C  | 21        | 1.4209                              | 1.3491 | 1.3206  | 1.3508  | 1.3424      | 1.3794 |
| C  | 13 | - H  | 14        | 1.0900                              | 1.0257 | 0.9216  | 0.9603  | 0.9727      | 0.9024 |
| C  | 13 | - C  | 15        | 1.4003                              | 1.3951 | 1.4321  | 1.4876  | 1.4494      | 1.5479 |
| C  | 13 | - C  | 19        | 2.7949                              | 0.0611 | 0.1095  | 0.1138  | 0.0839      | 0.1185 |
| C  | 15 | - H  | 16        | 1.0920                              | 1.0311 | 0.9277  | 0.9692  | 0.9801      | 0.9076 |
| C  | 15 | - C  | 17        | 1.4019                              | 1.3703 | 1.4076  | 1.4646  | 1.4240      | 1.5259 |
| C  | 15 | - C  | 21        | 2.7958                              | 0.0532 | 0.0939  | 0.0973  | 0.0908      | 0.0997 |
| C  | 17 | - H  | 18        | 1.0908                              | 1.0322 | 0.9289  | 0.9725  | 0.9861      | 0.9140 |
| C  | 17 | - C  | 19        | 1.3931                              | 1.4127 | 1.4631  | 1.5230  | 1.4805      | 1.5877 |
| C  | 19 | - H  | 20        | 1.0908                              | 1.0267 | 0.9268  | 0.9634  | 0.9749      | 0.9108 |
| C  | 19 | - C  | 21        | 1.4093                              | 1.3392 | 1.3454  | 1.3950  | 1.3835      | 1.4298 |
| C  | 21 | - C  | 22        | 1.4630                              | 1.1681 | 1.0954  | 1.1291  | 1.1316      | 1.1170 |
| C  | 22 | - C  | 23        | 1.4038                              | 1.3596 | 1.3479  | 1.3949  | 1.4103      | 1.4060 |
| C  | 22 | - C  | 26        | 2.7796                              | 0.0517 | 0.0841  | 0.0864  | 0.0868      | 0.0851 |
| C  | 23 | - H  | 24        | 1.0894                              | 1.0131 | 0.9207  | 0.9604  | 0.9751      | 0.9055 |
| C  | 23 | - C  | 25        | 1.3894                              | 1.4254 | 1.4418  | 1.4908  | 1.4923      | 1.5175 |
| C  | 23 | - C  | 27        | 2.7402                              | 0.0555 | 0.0944  | 0.0981  | 0.0915      | 0.1008 |
| C  | 25 | - C  | 26        | 1.4130                              | 1.3476 | 1.3083  | 1.3433  | 1.3432      | 1.3368 |
| C  | 25 | - C  | 29        | 1.5194                              | 0.9394 | 1.0164  | 1.0519  | 1.0527      | 1.0875 |
| C  | 26 | - C  | 27        | 1.3887                              | 1.4266 | 1.4061  | 1.4522  | 1.4518      | 1.4586 |
| C  | 26 | - C  | 37        | 1.5036                              | 0.9701 | 1.0156  | 1.0437  | 1.0404      | 1.0627 |
| C  | 27 | - H  | 28        | 1.0903                              | 1.0180 | 0.8969  | 0.9357  | 0.9262      | 0.8556 |
| C  | 29 | - H  | 30        | 1.1022                              | 1.0145 | 0.9156  | 0.9579  | 0.9876      | 0.9144 |
| C  | 29 | - H  | 31        | 1.1026                              | 1.0094 | 0.9137  | 0.9546  | 0.9838      | 0.9126 |
| C  | 29 | - C  | 32        | 1.5401                              | 0.9555 | 1.0076  | 1.0423  | 0.9826      | 1.1005 |
| C  | 32 | - H  | 33        | 1.1000                              | 1.0530 | 0.9248  | 0.9536  | 0.9615      | 0.9008 |
| C  | 32 | - C  | 34        | 1.5580                              | 0.9370 | 0.9905  | 1.0210  | 0.9649      | 1.0763 |
| C  | 32 | - C  | 39        | 1.5727                              | 0.9056 | 0.9457  | 0.9629  | 0.9686      | 0.9720 |
| C  | 34 | - H  | 35        | 1.0986                              | 1.0210 | 0.9342  | 0.9709  | 0.9965      | 0.9314 |
| C  | 34 | - H  | 36        | 1.0957                              | 1.0133 | 0.9330  | 0.9709  | 0.9968      | 0.9302 |
| C  | 34 | - C  | 37        | 1.5673                              | 0.9264 | 0.9714  | 1.0027  | 0.9443      | 1.0579 |
| C  | 37 | - H  | 38        | 1.0980                              | 1.0528 | 0.9224  | 0.9534  | 0.9622      | 0.8982 |
| C  | 37 | - C  | 39        | 1.5834                              | 0.8935 | 0.9263  | 0.9445  | 0.9505      | 0.9543 |
| C  | 39 | - C  | 40        | 1.5265                              | 0.9747 | 1.0168  | 1.0525  | 1.0506      | 1.1089 |
| C  | 39 | - C  | 44        | 1.5325                              | 0.9969 | 1.0084  | 1.0432  | 1.0420      | 1.0983 |
| C  | 40 | - H  | 41        | 1.1032                              | 0.9782 | 0.9441  | 0.9916  | 1.0288      | 0.9744 |
| C  | 40 | - H  | 42        | 1.0998                              | 0.9579 | 0.9430  | 0.9893  | 1.0275      | 0.9709 |
| C  | 40 | - H  | 43        | 1.1023                              | 0.9782 | 0.9425  | 0.9915  | 1.0312      | 0.9708 |
| C  | 44 | - H  | 45        | 1.1017                              | 0.9793 | 0.9451  | 0.9930  | 1.0311      | 0.9732 |
| C  | 44 | - H  | 47        | 1.0989                              | 0.9531 | 0.9476  | 0.9936  | 1.0293      | 0.9773 |
| C  | 44 | - H  | 47        | 1.1022                              | 0.9773 | 0.9448  | 0.9921  | 1.0296      | 0.9734 |
| C  | 48 | - H  | 49        | 1.4024                              | 1.4138 | 1.4230  | 1.4586  | 1.4260      | 1.5142 |
| C  | 48 | - C  | 53        | 2.8347                              | 0.0430 | 0.1006  | 0.1033  | 0.0786      | 0.1073 |
| C  | 48 | - C  | 57        | 1.4197                              | 1.3486 | 1.3197  | 1.3489  | 1.3427      | 1.3747 |
| C  | 49 | - H  | 50        | 1.0905                              | 1.0254 | 0.9225  | 0.9609  | 0.9742      | 0.9052 |
| C  | 49 | - C  | 51        | 1.4014                              | 1.3898 | 1.4262  | 1.4818  | 1.4409      | 1.5439 |
| C  | 49 | - C  | 55        | 2.7931                              | 0.0601 | 0.1083  | 0.1126  | 0.0817      | 0.1173 |
| C  | 51 | - H  | 52        | 1.0919                              | 1.0309 | 0.9282  | 0.9695  | 0.9808      | 0.9088 |
| C  | 51 | - C  | 53        | 1.4011                              | 1.3772 | 1.4146  | 1.4709  | 1.4294      | 1.5331 |
| C  | 51 | - C  | 57        | 2.7987                              | 0.0554 | 0.0960  | 0.0995  | 0.0949      | 0.1018 |
| C  | 53 | - H  | 54        | 1.0909                              | 1.0321 | 0.9292  | 0.9726  | 0.9862      | 0.9146 |
| C  | 53 | - C  | 55        | 1.3941                              | 1.4052 | 1.4571  | 1.5167  | 1.4748      | 1.5807 |
| C  | 55 | - H  | 56        | 1.0908                              | 1.0271 | 0.9267  | 0.9632  | 0.9744      | 0.9103 |
| C  | 55 | - C  | 57        | 1.4081                              | 1.3475 | 1.3522  | 1.4014  | 1.3924      | 1.4337 |
| C  | 57 | - C  | 58        | 1.4632                              | 1.1597 | 1.0921  | 1.1254  | 1.1262      | 1.1098 |
| C  | 58 | - C  | 59        | 1.4037                              | 1.3611 | 1.3480  | 1.3949  | 1.4119      | 1.4032 |

Electronic Supplementary Information for Dalton Transactions  
This journal is © The Royal Society of Chemistry 2009

|                    |    |   |   |    |          |          |          |          |          |        |
|--------------------|----|---|---|----|----------|----------|----------|----------|----------|--------|
| C                  | 58 | - | C | 62 | 2.7791   | 0.0534   | 0.0852   | 0.0876   | 0.0882   | 0.0861 |
| C                  | 59 | - | H | 60 | 1.0894   | 1.0135   | 0.9210   | 0.9604   | 0.9746   | 0.9055 |
| C                  | 59 | - | C | 61 | 1.3891   | 1.4245   | 1.4423   | 1.4912   | 1.4927   | 1.5173 |
| C                  | 59 | - | C | 63 | 2.7390   | 0.0560   | 0.0954   | 0.0992   | 0.0926   | 0.1019 |
| C                  | 61 | - | C | 62 | 1.4128   | 1.3495   | 1.3099   | 1.3451   | 1.3450   | 1.3388 |
| C                  | 61 | - | C | 65 | 1.5199   | 0.9396   | 1.0161   | 1.0516   | 1.0523   | 1.0872 |
| C                  | 62 | - | C | 63 | 1.3895   | 1.4261   | 1.4051   | 1.4512   | 1.4508   | 1.4580 |
| C                  | 62 | - | C | 73 | 1.5044   | 0.9707   | 1.0153   | 1.0434   | 1.0398   | 1.0625 |
| C                  | 63 | - | H | 64 | 1.0904   | 1.0176   | 0.8979   | 0.9366   | 0.9274   | 0.8573 |
| C                  | 65 | - | H | 66 | 1.1024   | 1.0150   | 0.9160   | 0.9581   | 0.9877   | 0.9147 |
| C                  | 65 | - | H | 67 | 1.1028   | 1.0097   | 0.9141   | 0.9548   | 0.9838   | 0.9132 |
| C                  | 65 | - | C | 68 | 1.5403   | 0.9560   | 1.0077   | 1.0422   | 0.9825   | 1.1004 |
| C                  | 68 | - | H | 69 | 1.1002   | 1.0531   | 0.9250   | 0.9536   | 0.9615   | 0.9012 |
| C                  | 68 | - | C | 70 | 1.5579   | 0.9353   | 0.9904   | 1.0207   | 0.9647   | 1.0759 |
| C                  | 68 | - | C | 75 | 1.5727   | 0.9065   | 0.9457   | 0.9628   | 0.9685   | 0.9719 |
| C                  | 70 | - | H | 71 | 1.0959   | 1.0134   | 0.9332   | 0.9708   | 0.9966   | 0.9306 |
| C                  | 70 | - | H | 72 | 1.0987   | 1.0212   | 0.9342   | 0.9708   | 0.9964   | 0.9312 |
| C                  | 70 | - | C | 73 | 1.5677   | 0.9261   | 0.9713   | 1.0024   | 0.9442   | 1.0575 |
| C                  | 73 | - | H | 74 | 1.0981   | 1.0531   | 0.9227   | 0.9533   | 0.9621   | 0.8986 |
| C                  | 73 | - | C | 75 | 1.5834   | 0.8926   | 0.9267   | 0.9448   | 0.9507   | 0.9546 |
| C                  | 75 | - | C | 76 | 1.5329   | 0.9966   | 1.0084   | 1.0431   | 1.0417   | 1.0982 |
| C                  | 75 | - | C | 80 | 1.5266   | 0.9747   | 1.0168   | 1.0524   | 1.0504   | 1.1088 |
| C                  | 76 | - | H | 77 | 1.1020   | 0.9794   | 0.9454   | 0.9930   | 1.0309   | 0.9735 |
| C                  | 76 | - | H | 78 | 1.0993   | 0.9533   | 0.9477   | 0.9935   | 1.0292   | 0.9773 |
| C                  | 76 | - | H | 79 | 1.1023   | 0.9774   | 0.9450   | 0.9921   | 1.0294   | 0.9737 |
| C                  | 80 | - | H | 81 | 1.1033   | 0.9783   | 0.9443   | 0.9916   | 1.0286   | 0.9748 |
| C                  | 80 | - | H | 82 | 1.1000   | 0.9584   | 0.9428   | 0.9892   | 1.0276   | 0.9705 |
| C                  | 80 | - | H | 83 | 1.1024   | 0.9783   | 0.9428   | 0.9916   | 1.0310   | 0.9712 |
| C                  | 84 | - | C | 85 | 2.6589   | 0.0695   | 0.0715   | 0.0720   | 0.0329   | 0.0681 |
| C                  | 86 | - | C | 87 | 2.6572   | 0.0706   | 0.0733   | 0.0737   | 0.0381   | 0.0699 |
| Sum :              |    |   |   |    | 110.7739 | 111.5437 | 117.3543 | 117.3543 | 117.3543 |        |
| Atomic summation : |    |   |   |    |          |          |          |          |          |        |
| Ru                 | 1  |   |   |    | 4.3228   | 4.5018   | 5.0961   | 5.1624   | 4.9202   |        |
| Ru                 | 2  |   |   |    | 4.3828   | 4.5172   | 5.1034   | 5.1696   | 4.9304   |        |
| Cl                 | 3  |   |   |    | 1.0978   | 0.9909   | 1.2607   | 1.3534   | 1.4692   |        |
| O                  | 4  |   |   |    | 1.9871   | 1.9636   | 2.4479   | 2.6400   | 2.6050   |        |
| H                  | 5  |   |   |    | 1.1424   | 0.8824   | 1.1087   | 1.0523   | 1.0884   |        |
| O                  | 6  |   |   |    | 2.2883   | 2.5115   | 2.7436   | 2.7473   | 2.7900   |        |
| O                  | 7  |   |   |    | 2.2830   | 2.5084   | 2.7390   | 2.7457   | 2.7894   |        |
| O                  | 8  |   |   |    | 2.2766   | 2.5024   | 2.7325   | 2.7428   | 2.7920   |        |
| O                  | 9  |   |   |    | 2.2889   | 2.5124   | 2.7438   | 2.7471   | 2.7892   |        |
| N                  | 10 |   |   |    | 3.1845   | 3.4780   | 3.6924   | 3.7021   | 3.7750   |        |
| N                  | 11 |   |   |    | 3.1951   | 3.4836   | 3.6955   | 3.7023   | 3.7723   |        |
| C                  | 12 |   |   |    | 3.7474   | 3.9701   | 4.1458   | 4.1038   | 4.2325   |        |
| C                  | 13 |   |   |    | 4.0308   | 3.9878   | 4.1293   | 4.1207   | 4.1907   |        |
| H                  | 14 |   |   |    | 1.0687   | 0.9837   | 1.0259   | 1.0357   | 0.9629   |        |
| C                  | 15 |   |   |    | 3.9765   | 3.9858   | 4.1504   | 4.1366   | 4.2137   |        |
| H                  | 16 |   |   |    | 1.0395   | 0.9800   | 1.0238   | 1.0349   | 0.9579   |        |
| C                  | 17 |   |   |    | 3.9612   | 3.9859   | 4.1539   | 4.1460   | 4.2248   |        |
| H                  | 18 |   |   |    | 1.0425   | 0.9808   | 1.0268   | 1.0368   | 0.9639   |        |
| C                  | 19 |   |   |    | 3.9573   | 3.9926   | 4.1510   | 4.1453   | 4.2050   |        |
| H                  | 20 |   |   |    | 1.0352   | 0.9873   | 1.0263   | 1.0344   | 0.9690   |        |
| C                  | 21 |   |   |    | 4.0472   | 4.0187   | 4.1449   | 4.1327   | 4.1964   |        |
| C                  | 22 |   |   |    | 4.0910   | 4.0057   | 4.1637   | 4.1521   | 4.1822   |        |
| C                  | 23 |   |   |    | 3.9484   | 3.9885   | 4.1363   | 4.1373   | 4.1265   |        |
| H                  | 24 |   |   |    | 1.0485   | 0.9837   | 1.0262   | 1.0352   | 0.9660   |        |
| C                  | 25 |   |   |    | 3.8925   | 4.0115   | 4.1414   | 4.1200   | 4.1945   |        |
| C                  | 26 |   |   |    | 3.8938   | 4.0189   | 4.1392   | 4.1331   | 4.1542   |        |
| C                  | 27 |   |   |    | 4.0016   | 3.9631   | 4.1412   | 4.1107   | 4.1278   |        |
| H                  | 28 |   |   |    | 1.0838   | 0.9796   | 1.0266   | 1.0403   | 0.9436   |        |
| C                  | 29 |   |   |    | 3.9094   | 3.9610   | 4.1191   | 4.1396   | 4.1306   |        |
| H                  | 30 |   |   |    | 1.0857   | 0.9797   | 1.0246   | 1.0273   | 0.9750   |        |
| H                  | 31 |   |   |    | 1.0872   | 0.9809   | 1.0246   | 1.0266   | 0.9773   |        |
| C                  | 32 |   |   |    | 3.7973   | 3.9910   | 4.1062   | 4.0788   | 4.1733   |        |
| C                  | 33 |   |   |    | 1.0918   | 0.9877   | 1.0187   | 1.0268   | 0.9613   |        |
| C                  | 34 |   |   |    | 3.8636   | 3.9572   | 4.0986   | 4.1148   | 4.1324   |        |
| H                  | 35 |   |   |    | 1.0768   | 0.9843   | 1.0230   | 1.0242   | 0.9790   |        |
| H                  | 36 |   |   |    | 1.1052   | 0.9820   | 1.0219   | 1.0235   | 0.9771   |        |
| C                  | 37 |   |   |    | 3.7950   | 3.9897   | 4.1039   | 4.0898   | 4.1318   |        |
| H                  | 38 |   |   |    | 1.0939   | 0.9868   | 1.0202   | 1.0291   | 0.9599   |        |
| C                  | 39 |   |   |    | 3.8503   | 4.0184   | 4.1274   | 4.0610   | 4.2525   |        |
| C                  | 40 |   |   |    | 3.8777   | 3.9270   | 4.1094   | 4.1924   | 4.1139   |        |
| H                  | 41 |   |   |    | 1.0791   | 0.9821   | 1.0311   | 1.0141   | 1.0107   |        |
| H                  | 42 |   |   |    | 1.0631   | 0.9823   | 1.0303   | 1.0134   | 1.0090   |        |
| H                  | 43 |   |   |    | 1.0814   | 0.9798   | 1.0302   | 1.0144   | 1.0062   |        |
| C                  | 44 |   |   |    | 3.8870   | 3.9280   | 4.1078   | 4.1889   | 4.1123   |        |
| H                  | 45 |   |   |    | 1.0772   | 0.9809   | 1.0301   | 1.0144   | 1.0071   |        |
| H                  | 46 |   |   |    | 1.0782   | 0.9834   | 1.0309   | 1.0135   | 1.0120   |        |
| H                  | 47 |   |   |    | 1.0766   | 0.9816   | 1.0303   | 1.0142   | 1.0084   |        |
| C                  | 48 |   |   |    | 3.7556   | 3.9755   | 4.1476   | 4.1053   | 4.2314   |        |
| C                  | 49 |   |   |    | 4.0287   | 3.9885   | 4.1296   | 4.1229   | 4.1962   |        |
| H                  | 50 |   |   |    | 1.0681   | 0.9847   | 1.0265   | 1.0354   | 0.9658   |        |
| C                  | 51 |   |   |    | 3.9749   | 3.9865   | 4.1513   | 4.1377   | 4.2183   |        |
| C                  | 52 |   |   |    | 1.0403   | 0.9804   | 1.0241   | 1.0348   | 0.9591   |        |
| C                  | 53 |   |   |    | 3.9595   | 3.9862   | 4.1538   | 4.1462   | 4.2255   |        |
| H                  | 54 |   |   |    | 1.0423   | 0.9811   | 1.0269   | 1.0367   | 0.9645   |        |
| C                  | 55 |   |   |    | 3.9627   | 3.9927   | 4.1503   | 4.1442   | 4.2007   |        |
| C                  | 56 |   |   |    | 1.0346   | 0.9872   | 1.0261   | 1.0343   | 0.9685   |        |
| C                  | 57 |   |   |    | 4.0514   | 4.0204   | 4.1446   | 4.1319   | 4.1874   |        |
| C                  | 58 |   |   |    | 4.0920   | 4.0056   | 4.1622   | 4.1538   | 4.1706   |        |
| C                  | 59 |   |   |    | 3.9532   | 3.9892   | 4.1363   | 4.1363   | 4.1233   |        |
| H                  | 60 |   |   |    | 1.0478   | 0.9842   | 1.0263   | 1.0352   | 0.9662   |        |
| C                  | 61 |   |   |    | 3.8883   | 4.0118   | 4.1413   | 4.1204   | 4.1941   |        |
| C                  | 62 |   |   |    | 3.8950   | 4.0193   | 4.1397   | 4.1335   | 4.1554   |        |
| C                  | 63 |   |   |    | 3.9938   | 3.9641   | 4.1411   | 4.1120   | 4.1270   |        |
| H                  | 64 |   |   |    | 1.0819   | 0.9801   | 1.0268   | 1.0402   | 0.9445   |        |
| C                  | 65 |   |   |    | 3.9107   | 3.9613   | 4.1188   | 4.1395   | 4.1309   |        |
| H                  | 66 |   |   |    | 1.0854   | 0.9799   | 1.0246   | 1.0272   | 0.9752   |        |
| H                  | 67 |   |   |    | 1.0864   | 0.9812   | 1.0246   | 1.0265   | 0.9778   |        |
| C                  | 68 |   |   |    | 3.7957   | 3.9913   | 4.1059   | 4.0787   | 4.1734   |        |
| H                  | 69 |   |   |    | 1.0913   | 0.9880   | 1.0188   | 1.0268   | 0.9618   |        |
| C                  | 70 |   |   |    | 3.8602   | 3.9576   | 4.0983   | 4.1144   | 4.1321   |        |
| H                  | 71 |   |   |    | 1.1042   | 0.9823   | 1.0218   | 1.0233   | 0.9775   |        |
| H                  | 72 |   |   |    | 1.0784   | 0.9843   | 1.0229   | 1.0242   | 0.9789   |        |
| C                  | 73 |   |   |    | 3.7970   | 3.9901   | 4.1035   | 4.0895   | 4.1319   |        |
| H                  | 74 |   |   |    | 1.0929   | 0.9871   | 1.0201   | 1.0289   | 0.9603   |        |
| C                  | 75 |   |   |    | 3.8487   | 4.0185   | 4.1271   | 4.0608   | 4.2522   |        |
| C                  | 76 |   |   |    | 3.8865   | 3.9283   | 4.1074   | 4.1887   | 4.1125   |        |
| H                  | 77 |   |   |    | 1.0767   | 0.9811   | 1.0300   | 1.0142   | 1.0074   |        |
| H                  | 78 |   |   |    | 1.0780   | 0.9835   | 1.0308   | 1.0134   | 1.0120   |        |
| H                  | 79 |   |   |    | 1.0764   | 0.9817   | 1.0302   | 1.0141   | 1.0086   |        |
| C                  | 80 |   |   |    | 3.8782   | 3.9272   | 4.1093   | 4.1923   | 4.1141   |        |
| H                  | 81 |   |   |    | 1.0787   | 0.9824   | 1.0311   | 1.0140   | 1.0111   |        |

Electronic Supplementary Information for Dalton Transactions  
This journal is © The Royal Society of Chemistry 2009

|   |    |        |        |        |        |        |
|---|----|--------|--------|--------|--------|--------|
| H | 82 | 1.0634 | 0.9821 | 1.0301 | 1.0133 | 1.0085 |
| H | 83 | 1.0811 | 0.9800 | 1.0303 | 1.0143 | 1.0066 |
| C | 84 | 3.3619 | 3.6172 | 3.9320 | 3.8651 | 3.8976 |
| C | 85 | 3.3345 | 3.5988 | 3.8977 | 3.8426 | 3.8520 |
| C | 86 | 3.3629 | 3.6094 | 3.9052 | 3.8446 | 3.8706 |
| C | 87 | 3.3566 | 3.6168 | 3.9290 | 3.8634 | 3.8942 |

---

(\*) Values from:

- Mayer bond-order analysis
  - Gopinatan-Jug bond order analysis
  - Nalewajski-Mrozek bond order analysis
    - a) N-M (1) - bond-orders calculated from two-electron valence indices based on partitioning of  $\text{tr}(\Delta_P^2)$  (3-index set)
    - b) N-M (2) - bond-orders calculated from two-electron valence indices based on partitioning of  $\text{tr}(\Delta_P^2)$  (4-index set)
    - c) N-M (3) - bond-orders calculated from valence indices based on partitioning of  $\text{tr}(P^*\Delta_P)$
- A. Michalak, R.L. DeRock, T. Ziegler, J. Comp. Chem., subm.  
and original articles by Nalewajski et al. )

c) ax-ax-3c

=====
   
MODEL PARAMETERS
   
=====

DENSITY FUNCTIONAL POTENTIAL (scf)

LDA: VMN
   
Gradient Corrections: Becke88 Perdew86 == Not Default ==

SPIN (restricted / unrestr.)

Molecule: Restricted

OTHER ASPECTS

Relativistic Corrections: ---
   
Core Treatment: Frozen Orbital(s)
   
Electric Field: ---
   
Hyperfine or Zeeman Interaction: ---

=====
   
Geometry Convergence Tests
   
=====

Energy old : -13.26215010
   
new : -13.26215374

Convergence tests:

(Energies in hartree, Gradients in hartree/angstr or radian, Lengths in angstrom, Angles in degrees)

| Item             | Value       | Criterion  | Conv. | Ratio      |
|------------------|-------------|------------|-------|------------|
| change in energy | -0.00000365 | 0.00100000 | YES   | 0.28152177 |
| gradient max     | 0.00082616  | 0.00100000 | YES   | 0.68237568 |
| gradient rms     | 0.00018868  | 0.00066667 | YES   | 0.73645129 |
| cart. step max   | 0.00276520  | 0.01000000 | YES   | 1.08786772 |
| cart. step rms   | 0.00082603  | 0.00666667 | YES   | 1.04888315 |

prediction dE : -0.00000416

\*\*\*\*\*
   
Geometry CONVERGED
   
\*\*\*\*\*

\*\*\*\*\*
   
\* Final Geometry \*
   
\*\*\*\*\*

Coordinates (Cartesian)

=====

| Atom  | bohr      |           |           | angstrom  |           |           | Geometric Variables   |     |     |
|-------|-----------|-----------|-----------|-----------|-----------|-----------|-----------------------|-----|-----|
|       | X         | Y         | Z         | X         | Y         | Z         | (0:frozen, *:LT par.) |     |     |
| 1 C   | 6.532380  | -0.561811 | -5.702084 | 3.456786  | -0.297298 | -3.017413 | 1                     | 2   | 3   |
| 2 H   | 2.438597  | -0.149051 | -5.701922 | 1.290450  | -0.078874 | -3.017327 | 4                     | 5   | 6   |
| 3 O   | 0.269403  | 7.637673  | -4.809227 | 0.142562  | 4.041682  | -2.544933 | 7                     | 8   | 9   |
| 4 C   | 4.231155  | 0.350128  | -4.817150 | 2.239031  | 0.185280  | -2.549126 | 10                    | 11  | 12  |
| 5 C   | 8.733566  | 0.132733  | -4.415680 | 4.621604  | 0.070239  | -2.336677 | 13                    | 14  | 15  |
| 6 Cl  | -2.139865 | -0.033203 | -3.660535 | -1.132368 | -0.017571 | -1.937072 | 16                    | 17  | 18  |
| 7 C   | 0.392323  | 5.958395  | -3.400200 | 0.207608  | 3.153047  | -1.799308 | 19                    | 20  | 21  |
| 8 N   | 4.060139  | 1.872997  | -2.789244 | 2.148533  | 0.991148  | -1.476004 | 22                    | 23  | 24  |
| 9 O   | 3.209952  | -5.871529 | -2.560260 | 1.698633  | -3.107079 | -1.354831 | 25                    | 26  | 27  |
| 10 C  | 8.557969  | 1.718086  | -2.328391 | 4.528682  | 0.909172  | -1.232132 | 28                    | 29  | 30  |
| 11 O  | -4.488389 | -7.639113 | -1.904270 | -2.375153 | -4.042445 | -1.007697 | 31                    | 32  | 33  |
| 12 H  | 10.253369 | 2.281055  | -1.310112 | 5.425849  | 1.207082  | -0.693281 | 34                    | 35  | 36  |
| 13 C  | 1.544556  | -4.780231 | -1.631801 | 0.817344  | -2.529589 | -0.863512 | 37                    | 38  | 39  |
| 14 C  | 6.185721  | 2.601927  | -1.525641 | 3.273342  | 1.376880  | -0.807335 | 40                    | 41  | 42  |
| 15 C  | -3.271565 | -5.957480 | -1.187053 | -1.731238 | -3.152563 | -0.628161 | 43                    | 44  | 45  |
| 16 Ru | 0.560138  | 3.222467  | -1.107781 | 0.296412  | 1.705256  | -0.586212 | 46                    | 47  | 48  |
| 17 H  | -6.124696 | 0.180615  | -0.640281 | -3.241050 | 0.095577  | -0.338822 | 49                    | 50  | 51  |
| 18 Ru | -1.258455 | -3.241123 | -0.033181 | -0.665946 | -1.715128 | -0.017558 | 52                    | 53  | 54  |
| 19 C  | 5.760682  | 4.334752  | 0.589369  | 3.048422  | 2.293852  | 0.311881  | 55                    | 56  | 57  |
| 20 C  | -2.184280 | 4.634214  | 0.680284  | -1.155871 | 2.452320  | 0.359991  | 58                    | 59  | 60  |
| 21 C  | 3.225596  | 0.563545  | 1.089629  | 1.706912  | 2.679512  | 0.576607  | 61                    | 62  | 63  |
| 22 C  | -6.244585 | -0.313233 | 1.356681  | -3.304492 | -0.165756 | 0.717925  | 64                    | 65  | 66  |
| 23 O  | 0.990243  | -0.087895 | 1.175450  | 0.524014  | -0.046512 | 0.622021  | 67                    | 68  | 69  |
| 24 H  | 9.699487  | 4.731225  | 1.684530  | 5.132747  | 2.503656  | 0.891415  | 70                    | 71  | 72  |
| 25 H  | -9.668942 | 1.740466  | 2.118520  | -5.116584 | 0.921015  | 1.121072  | 73                    | 74  | 75  |
| 26 C  | 7.755973  | 5.303717  | 2.062306  | 4.104284  | 2.806606  | 1.091325  | 76                    | 77  | 78  |
| 27 O  | -3.788411 | 5.655394  | 1.786940  | -2.004741 | 2.992706  | 0.945608  | 79                    | 80  | 81  |
| 28 N  | -4.360510 | -1.783698 | 2.228482  | -2.307482 | -0.943893 | 1.179262  | 82                    | 83  | 84  |
| 29 H  | 2.670395  | -7.306004 | 2.561778  | 1.413112  | -3.866171 | 1.355634  | 85                    | 86  | 87  |
| 30 C  | -8.187879 | 0.546321  | 2.902674  | -4.332839 | 0.289101  | 1.536029  | 88                    | 89  | 90  |
| 31 C  | 2.795764  | 6.799915  | 3.046593  | 1.479454  | 3.598360  | 1.612187  | 91                    | 92  | 93  |
| 32 H  | 0.882448  | 7.434693  | 3.471357  | 0.466972  | 3.934270  | 1.836963  | 94                    | 95  | 96  |
| 33 C  | -0.589826 | -4.976361 | 3.409926  | -0.312122 | -2.633377 | 1.804455  | 97                    | 98  | 99  |
| 34 C  | 7.280537  | 7.006621  | 4.011152  | 3.852694  | 3.707744  | 2.122610  | 100                   | 101 | 102 |
| 35 C  | 1.370876  | -6.654216 | 4.020882  | 0.725436  | -3.521259 | 2.127759  | 103                   | 104 | 105 |
| 36 C  | 4.790911  | 7.760307  | 4.494717  | 2.535241  | 4.106578  | 2.378502  | 106                   | 107 | 108 |
| 37 H  | 8.835848  | 7.749882  | 5.140239  | 4.675729  | 4.101061  | 2.720097  | 109                   | 110 | 111 |
| 38 C  | -4.322081 | -2.517261 | 4.702723  | -2.287147 | -1.332077 | 2.488574  | 112                   | 113 | 114 |
| 39 C  | -8.162724 | -0.146060 | 5.453009  | -4.319527 | -0.077291 | 2.885608  | 115                   | 116 | 117 |
| 40 H  | 4.396346  | 9.107323  | 6.007049  | 2.326446  | 4.819388  | 3.178794  | 118                   | 119 | 120 |
| 41 C  | -2.239951 | -4.206483 | 5.386042  | -1.185331 | -2.225975 | 2.850171  | 121                   | 122 | 123 |
| 42 C  | -6.227910 | -1.679271 | 6.351790  | -3.295668 | -0.888632 | 3.361223  | 124                   | 125 | 126 |
| 43 C  | 1.717543  | -7.521074 | 6.494358  | 0.908885  | -3.979981 | 3.436666  | 127                   | 128 | 129 |
| 44 H  | 3.265526  | -8.820052 | 6.910465  | 1.728042  | -4.667371 | 3.656860  | 130                   | 131 | 132 |
| 45 H  | -9.648134 | 0.499440  | 6.728622  | -5.105572 | 0.264293  | 3.560633  | 133                   | 134 | 135 |
| 46 C  | -1.871387 | -5.081582 | 7.875688  | -0.990295 | -2.689057 | 4.167635  | 136                   | 137 | 138 |
| 47 H  | -6.191308 | -2.251889 | 8.326153  | -3.276299 | -1.191648 | 4.406010  | 139                   | 140 | 141 |
| 48 C  | 0.098825  | -6.730997 | 8.434325  | 0.052296  | -3.561890 | 4.463252  | 142                   | 143 | 144 |
| 49 H  | -3.128951 | -4.470392 | 9.389800  | -1.655770 | -2.365630 | 4.968868  | 145                   | 146 | 147 |
| 50 H  | 0.374847  | -7.400278 | 10.363572 | 0.198360  | -3.916059 | 5.484166  | 148                   | 149 | 150 |
| 51 H  | 10.573433 | -0.558019 | -5.038838 | 5.595220  | -0.295291 | -2.666438 | 151                   | 152 | 153 |

Electronic Supplementary Information for Dalton Transactions  
This journal is © The Royal Society of Chemistry 2009

```

52 H      6.581047  -1.802224  -7.343415  3.482540  -0.953696  -3.885968  154  155  156
53 H      0.824839  0.217767  2.983280  0.436486  0.115238  1.578684  157  158  159
-----
Number of elements of the density matrix on this node (used, total):    199365    396495

=====
Numerical Integration : Voronoi Polyhedra (Te Velde)  *** (parameters, tests)  ***
=====

General Accuracy Parameter :                      4.50

Symmetry used in the points section:  NOSYM

Summary of the Symmetry Unique Points:
-----
Nr. of used Symmetry Operators                    1

Points in the Atomic Spheres                      33332
Points in the Atomic Polyhedra                   344096
Points in the Outer Region                       29659
-----
Total                                             407087

Sum of Weights                                  160406.077012

Total nr. of points:      407087
Nr. of blocks:           3181
Block length:            128
Nr. of dummy points:     81

Test of Precision of the Numerical Integration Grid
=====

Integral of the Total Core Density:      55.99998029517992
Relative Error:                        -3.519E-07

=====
B O N D I N G   E N E R G Y  *** (decomposition)  ***
=====

*** WARNING ***

The bond energy is computed as an energy difference between molecule and
fragments. In particular when the fragments are single atoms, they are usually
computed as SPHERICALLY SYMMETRIC and SPIN-RESTRICTED. Obviously, this usually
does NOT represent the true atomic groundstate.

To obtain the 'real' bond energy, (atomic) correction terms must be applied
for the true (multiplet) fragment ground state. See ref: E.J.Baerends,
V.Branchadell, M.Sodupe, Chem.Phys.Lett.265 (1997) 481

General theoretical background on the bond energy decomposition scheme used
here (Morokuma-Ziegler) can be found in the review paper:
F.M. Bickelhaupt and E.J. Baerends,
"Kohn-Sham Density Functional Theory: Predicting and Understanding Chemistry"
In: Rev. Comput. Chem.; Lipkowitz, K. B. and Boyd, D. B., Eds.;
Wiley-VCH: New York, 2000, Vol. 15, 1-86.

Symbols used in the Bickelhaupt-Baerends (BB) paper are given below to make
the direct connection to that paper, where detailed explanations can be found
on the meaning of the various terms.

-----
                                hartree          eV          kcal/mol          kJ/mol
-----

Pauli Repulsion
Kinetic (Delta T^0):      154.331086302806511      4199.5625      96844.23      405196.21
Delta V^Pauli Coulomb:    -80.179197333956438      -2181.7870      -50313.21      -210510.45
Delta V^Pauli LDA-XC:     -19.109076423000307      -519.9844      -11991.13      -50170.87
Delta V^Pauli GGA-Exchange:  1.113919489302958      30.3113      699.00      2924.60
Delta V^Pauli GGA-Correlation: -0.311817917689307      -8.4850      -195.67      -818.68
-----
Total Pauli Repulsion:    55.844914117463418      1519.6174      35043.22      146620.80
(Total Pauli Repulsion =
Delta E^Pauli in BB paper)

Steric Interaction
Pauli Repulsion (Delta E^Pauli):  55.844914117463418      1519.6174      35043.22      146620.80
Electrostatic Interaction:    -11.887072527966744      -323.4637      -7459.25      -31209.50
(Electrostatic Interaction =
Delta V_elstat in the BB paper)
-----
Total Steric Interaction:    43.957841589496674      1196.1537      27583.96      115411.30
(Total Steric Interaction =
Delta E^0 in the BB paper)

Orbital Interactions
A:      -57.212938990762275      -1556.8433      -35901.67      -150212.55
-----
Total Orbital Interactions:  -57.220005497697414      -1557.0356      -35906.10      -150231.10

Alternative Decomposition Orb.Int.
Kinetic:      -141.774337006106805      -3857.8760      -88964.75      -372228.47
Coulomb:      77.944845391469443      2120.9872      48911.13      204644.16
XC:          6.609486116939869      179.8533      4147.52      17353.20
-----
Total Orbital Interactions:  -57.220005497697493      -1557.0356      -35906.10      -150231.10

Residu (E-Steric+OrbInt+Res):  0.000008818684727      0.0002      0.01      0.02

Total Bonding Energy:      -13.262155089516014      -360.8816      -8322.13      -34819.78

=====
Summary of Bonding Energy (energy terms are taken from the energy decomposition above)
=====

Electrostatic Energy:      -11.887072527966744      -323.4637      -7459.25      -31209.50
Kinetic Energy:           12.556749296699707      341.6865      7879.48      32967.74
Coulomb (Steric+OrbInt) Energy: -2.234343123802262      -60.7996      -1402.07      -5866.27
XC Energy:                 -11.697488734446789      -318.3049      -7340.29      -30711.75

```

|                       |                              |                    |                   |                    |
|-----------------------|------------------------------|--------------------|-------------------|--------------------|
| Total Bonding Energy: | -----<br>-13.262155089516089 | -----<br>-360.8816 | -----<br>-8322.13 | -----<br>-34819.78 |
|-----------------------|------------------------------|--------------------|-------------------|--------------------|

Correction terms (incorporated in energies above; only for test purposes):

1. Indication of fit-quality: 1st-order fit-correction used in the energy (hartree): -0.0028811277  
2. Electrostatic (Fit correction): 0.0000000000

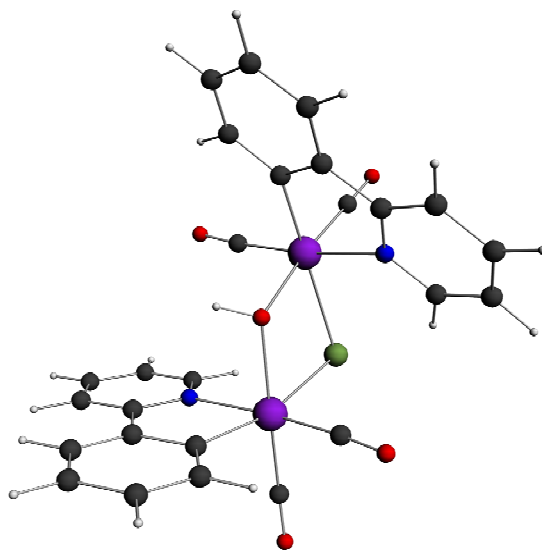

Figure 1

(1) Two points numerical differentiation frequencies

=====

MODEL PARAMETERS  
=====

DENSITY FUNCTIONAL POTENTIAL (scf)  
LDA: VMN  
Gradient Corrections: Becke88 Perdew86 == Not Default ==

SPIN (restricted / unrestr.)  
Molecule: Restricted  
Fragments: Restricted

OTHER ASPECTS  
Relativistic Corrections: ---  
Core Treatment: Frozen Orbital(s)  
Electric Field: ---  
Hyperfine or Zeeman Interaction: ---

\*\*\*\*\*  
\* RUN TYPE : FREQUENCIES \*  
\*\*\*\*\*

List of All Frequencies:

Intensities  
=====

| Frequency<br>cm-1 | Dipole Strength<br>1e-40 esu <sup>2</sup> cm <sup>2</sup> | Absorption Intensity (degeneracy not counted)<br>km/mole |
|-------------------|-----------------------------------------------------------|----------------------------------------------------------|
| 4.572761          | 0.000000                                                  | 0.000000                                                 |
| 17.963003         | 0.000000                                                  | 0.000000                                                 |
| 26.946048         | 154.643087                                                | 1.044489                                                 |
| 31.127763         | 12.105504                                                 | 0.094451                                                 |
| 40.317049         | 21.469168                                                 | 0.216961                                                 |
| 56.164159         | 0.755760                                                  | 0.010640                                                 |
| 62.727514         | 0.947807                                                  | 0.014902                                                 |
| 69.072369         | 1.574261                                                  | 0.027256                                                 |
| 73.102035         | 9.678009                                                  | 0.177335                                                 |
| 79.810621         | 82.074872                                                 | 1.641909                                                 |
| 81.823805         | 66.262344                                                 | 1.359016                                                 |
| 86.843601         | 0.744705                                                  | 0.016211                                                 |
| 92.389847         | 13.129079                                                 | 0.304044                                                 |
| 93.040301         | 7.457387                                                  | 0.173915                                                 |
| 100.284992        | 26.484851                                                 | 0.665751                                                 |
| 110.229658        | 3.934493                                                  | 0.108709                                                 |
| 112.654989        | 13.078317                                                 | 0.369301                                                 |
| 122.429183        | 2.315971                                                  | 0.071072                                                 |
| 135.624865        | 71.822177                                                 | 2.441608                                                 |
| 163.093876        | 5.240463                                                  | 0.214233                                                 |
| 181.218018        | 36.020325                                                 | 1.636165                                                 |
| 183.303633        | 17.396865                                                 | 0.799319                                                 |
| 186.606642        | 39.695895                                                 | 1.856739                                                 |
| 190.209447        | 282.651073                                                | 13.475993                                                |
| 205.841230        | 169.050630                                                | 8.722224                                                 |
| 219.466905        | 29.820088                                                 | 1.640424                                                 |
| 247.096979        | 122.379529                                                | 7.579740                                                 |
| 249.907366        | 71.178956                                                 | 4.458705                                                 |
| 257.334070        | 10.456694                                                 | 0.674481                                                 |
| 263.592453        | 7.886087                                                  | 0.521042                                                 |
| 277.831295        | 50.648832                                                 | 3.527189                                                 |
| 280.189908        | 34.266353                                                 | 2.406570                                                 |
| 341.318145        | 160.061554                                                | 13.693816                                                |
| 362.692296        | 28.028415                                                 | 2.548091                                                 |
| 363.171763        | 25.746448                                                 | 2.343729                                                 |
| 411.684692        | 26.838515                                                 | 2.769499                                                 |
| 412.259359        | 85.861383                                                 | 8.872509                                                 |
| 420.559347        | 27.470153                                                 | 2.895786                                                 |
| 421.222428        | 3.850246                                                  | 0.406516                                                 |
| 443.043109        | 85.731830                                                 | 9.520640                                                 |
| 448.536964        | 620.512795                                                | 69.763306                                                |
| 462.204261        | 36.549547                                                 | 4.234421                                                 |
| 463.628969        | 24.397246                                                 | 2.835237                                                 |
| 467.453996        | 2.289743                                                  | 0.268290                                                 |
| 469.858924        | 3.527212                                                  | 0.415410                                                 |
| 473.736182        | 70.274301                                                 | 8.344708                                                 |
| 479.691060        | 103.479503                                                | 12.442110                                                |
| 498.633178        | 16.640597                                                 | 2.079832                                                 |
| 499.742169        | 5.168800                                                  | 0.647461                                                 |
| 517.541961        | 161.300236                                                | 20.924671                                                |
| 521.678671        | 52.974937                                                 | 6.927102                                                 |
| 539.301294        | 36.543661                                                 | 4.939939                                                 |
| 540.801395        | 10.188125                                                 | 1.381052                                                 |
| 553.026592        | 16.441617                                                 | 2.279127                                                 |
| 554.675793        | 5.473017                                                  | 0.760929                                                 |
| 585.561202        | 49.818408                                                 | 7.312068                                                 |
| 592.999069        | 126.685898                                                | 18.830435                                                |
| 622.246210        | 28.216699                                                 | 4.400951                                                 |
| 624.111563        | 66.422419                                                 | 10.390944                                                |
| 626.200738        | 112.175701                                                | 17.607206                                                |
| 626.894018        | 26.501767                                                 | 4.164348                                                 |
| 641.174093        | 18.502552                                                 | 2.973621                                                 |
| 642.403517        | 21.002296                                                 | 3.381838                                                 |
| 659.209502        | 9.700157                                                  | 1.602804                                                 |
| 660.008577        | 17.145416                                                 | 2.836454                                                 |
| 711.679309        | 27.429099                                                 | 4.892986                                                 |
| 712.242392        | 20.007586                                                 | 3.571911                                                 |



|             |             |            |
|-------------|-------------|------------|
| 721.219263  | 160.297180  | 28.978191  |
| 721.517404  | 125.974329  | 22.782792  |
| 739.631554  | 486.118292  | 90.122964  |
| 740.537320  | 169.002166  | 31.370200  |
| 755.904078  | 2.553650    | 0.483845   |
| 756.508331  | 2.789924    | 0.529035   |
| 780.765541  | 10.990208   | 2.150823   |
| 781.214937  | 20.140464   | 3.943829   |
| 840.034457  | 1.429052    | 0.300901   |
| 840.405383  | 4.965544    | 1.046005   |
| 861.072819  | 2.016098    | 0.435141   |
| 862.820670  | 3.912884    | 0.846244   |
| 888.574529  | 188.600148  | 42.006254  |
| 919.123219  | 0.276960    | 0.063807   |
| 919.168922  | 0.643741    | 0.148315   |
| 956.120070  | 3.976979    | 0.953112   |
| 958.661444  | 3.144829    | 0.755684   |
| 959.034465  | 4.215623    | 1.013384   |
| 960.728318  | 2.977850    | 0.717103   |
| 973.452081  | 2.191305    | 0.534682   |
| 974.807930  | 1.276758    | 0.311965   |
| 1000.608734 | 17.730774   | 4.447030   |
| 1001.811339 | 16.100125   | 4.042902   |
| 1007.599769 | 91.286021   | 23.055280  |
| 1008.162673 | 102.562968  | 25.917867  |
| 1018.227798 | 23.013877   | 5.873714   |
| 1019.008568 | 28.626422   | 7.311778   |
| 1046.929001 | 6.413352    | 1.682986   |
| 1048.335494 | 3.713035    | 0.975680   |
| 1053.706960 | 40.589638   | 10.720452  |
| 1055.950726 | 37.362344   | 9.889079   |
| 1097.661946 | 3.130842    | 0.861406   |
| 1098.570963 | 3.896272    | 1.072891   |
| 1116.276287 | 1.312882    | 0.367346   |
| 1117.427933 | 0.722344    | 0.202321   |
| 1149.994429 | 18.196917   | 5.245315   |
| 1150.652215 | 12.809545   | 3.694502   |
| 1157.881766 | 21.105975   | 6.125587   |
| 1158.036319 | 18.833128   | 5.466668   |
| 1235.410290 | 15.895654   | 4.922296   |
| 1236.169286 | 37.462482   | 11.607871  |
| 1272.348476 | 99.642714   | 31.778229  |
| 1273.164194 | 11.116447   | 3.547550   |
| 1288.169504 | 2.223870    | 0.718059   |
| 1289.515537 | 2.799431    | 0.904846   |
| 1299.808130 | 53.420299   | 17.404583  |
| 1300.409731 | 42.406490   | 13.822628  |
| 1314.699989 | 7.697204    | 2.536517   |
| 1314.993364 | 8.109882    | 2.673106   |
| 1411.007155 | 48.269927   | 17.071981  |
| 1411.121435 | 56.563661   | 20.006908  |
| 1426.330041 | 5.259044    | 1.880204   |
| 1426.461011 | 12.299940   | 4.397856   |
| 1441.162668 | 29.677429   | 10.720557  |
| 1442.800836 | 17.714963   | 6.406557   |
| 1467.787115 | 182.801223  | 67.254328  |
| 1469.164416 | 156.519780  | 57.639168  |
| 1541.415749 | 18.858805   | 7.286383   |
| 1543.040935 | 19.074785   | 7.377601   |
| 1555.988663 | 65.791729   | 25.659950  |
| 1557.501020 | 82.044494   | 32.029920  |
| 1570.634343 | 82.911788   | 32.641450  |
| 1571.923934 | 99.586489   | 39.238285  |
| 1593.510942 | 140.530434  | 56.131094  |
| 1594.278833 | 105.474959  | 42.149431  |
| 1942.577806 | 1097.785458 | 534.532316 |
| 1946.700737 | 1443.977142 | 704.591796 |
| 2002.837916 | 1731.305158 | 869.155530 |
| 2007.477491 | 945.299399  | 475.661648 |
| 3081.997041 | 1.245724    | 0.962348   |
| 3083.635854 | 1.678490    | 1.297358   |
| 3089.678543 | 7.287521    | 5.643795   |
| 3092.465397 | 3.611870    | 2.799723   |
| 3101.198066 | 40.645002   | 31.594736  |
| 3101.595084 | 0.264290    | 0.205468   |
| 3104.232288 | 1.895584    | 1.474943   |
| 3105.389604 | 14.183451   | 11.040178  |
| 3107.609894 | 3.892714    | 3.032195   |
| 3108.057753 | 12.854005   | 10.013955  |
| 3115.259685 | 53.672173   | 41.910371  |
| 3116.467748 | 42.906273   | 33.516719  |
| 3132.142497 | 2.006615    | 1.575374   |
| 3132.366893 | 1.168593    | 0.917517   |
| 3137.603894 | 22.321638   | 17.555057  |
| 3137.740191 | 1.487010    | 1.169524   |
| 3699.223373 | 24.229789   | 22.466647  |

=====  
 Statistical Thermal Analysis \*\*\* ideal gas assumed \*\*\*  
 =====

Pressure: 1.000000 atm.  
 Temperature: 298.150000 K

Moments of Inertia (and direction vectors)  
 =====

|            |            |            |
|------------|------------|------------|
| 14125.8418 | 22758.3625 | 24763.7368 |
| -----      | -----      | -----      |
| -0.6001    | 0.6142     | 0.5124     |
| -0.7196    | -0.6943    | -0.0107    |
| 0.3492     | -0.3752    | 0.8587     |

The rotational contribution to the molecular entropy includes a term, dependent on the symmetry number sigma. The results reported below were computed using sigma = 1, determined from the point group symmetry of the input geometry (NOSYM). If this is not the correct symmetry, please contact SCM to report a bug.

| Temp   |                                             | Transl | Rotat  | Vibrat  | Total   |
|--------|---------------------------------------------|--------|--------|---------|---------|
| ----   |                                             | -----  | -----  | -----   | -----   |
| 298.15 | Entropy (cal/mole-K):                       | 45.414 | 37.318 | 122.342 | 205.075 |
|        | Internal Energy (Kcal/mole):                | 0.889  | 0.889  | 244.613 | 246.391 |
|        | Constant Volume Heat Capacity (cal/mole-K): | 2.981  | 2.981  | 119.198 | 125.159 |

=====  
No memory problems found  
=====

Maximum number of active allocate calls: 160

\*\*\*\*\*

A D F E X I T

NORMAL TERMINATION

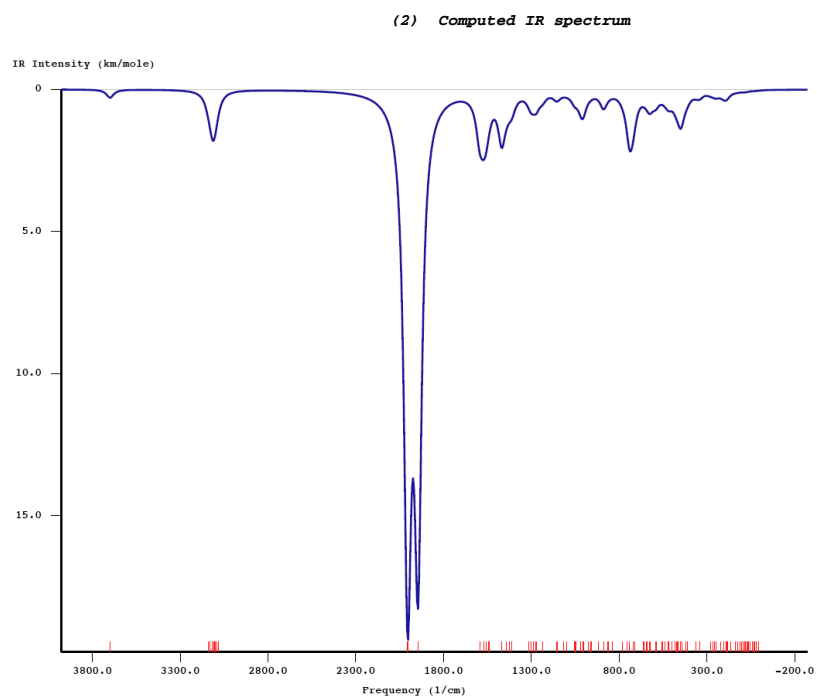

Figure 2

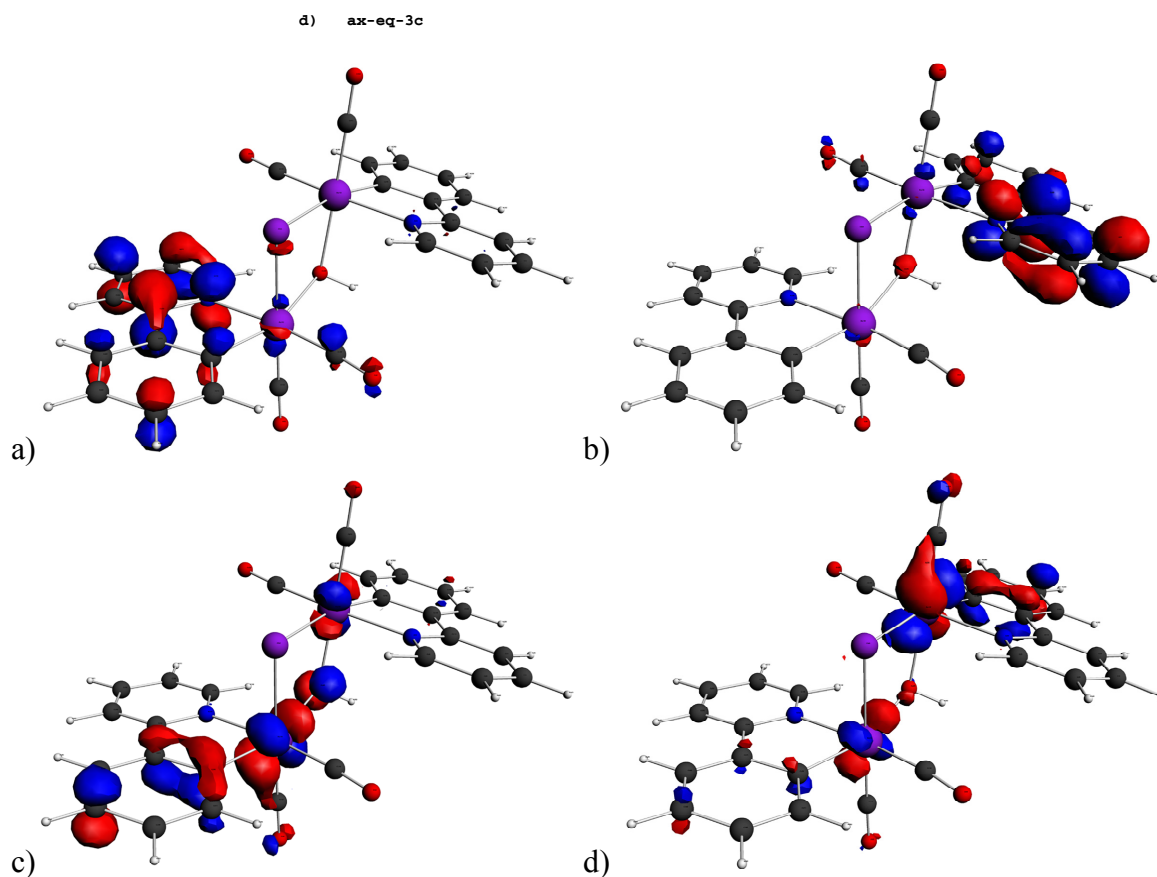

=====  
 Geometry Convergence Tests  
 =====

Energy old : -13.25708412  
 new : -13.25709926

Convergence tests:  
 (Energies in hartree, Gradients in hartree/angstr or radian, Lengths in angstrom, Angles in degrees)

| Item             | Value       | Criterion  | Conv. | Ratio      |
|------------------|-------------|------------|-------|------------|
| change in energy | -0.00001515 | 0.00050000 | YES   | 4.95419034 |
| gradient max     | 0.00089994  | 0.00100000 | YES   | 0.80220305 |
| gradient rms     | 0.00018575  | 0.00066667 | YES   | 0.88241599 |
| cart. step max   | 0.00306161  | 0.01000000 | YES   | 1.07877652 |
| cart. step rms   | 0.00087077  | 0.00666667 | YES   | 1.14194504 |

prediction dE : -0.00000912

\*\*\*\*\*  
 Geometry CONVERGED  
 \*\*\*\*\*

\*\*\*\*\*  
 \* Final Geometry \*  
 \*\*\*\*\*

Coordinates (Cartesian)  
 =====

| Atom | bohr      |           |            | angstrom  |           |           | Geometric Variables<br>(0:frozen, *:LT par.) |    |    |
|------|-----------|-----------|------------|-----------|-----------|-----------|----------------------------------------------|----|----|
|      | X         | Y         | Z          | X         | Y         | Z         |                                              |    |    |
| 1 C  | 6.589274  | -1.762976 | -6.522286  | 3.486894  | -0.932927 | -3.451445 | 1                                            | 2  | 3  |
| 2 H  | 5.438880  | -0.725911 | -2.710644  | 2.878131  | -0.384136 | -1.434411 | 4                                            | 5  | 6  |
| 3 C  | 5.152549  | -0.476185 | -4.736600  | 2.726612  | -0.251986 | -2.506501 | 7                                            | 8  | 9  |
| 4 C  | 6.066486  | -1.354402 | -9.081103  | 3.210246  | -0.716719 | -4.805513 | 10                                           | 11 | 12 |
| 5 Cl | 2.334303  | 0.442290  | 1.059320   | 1.235260  | 0.234050  | 0.560568  | 13                                           | 14 | 15 |
| 6 N  | 3.296967  | 1.136002  | -5.381135  | 1.744680  | 0.601147  | -2.847574 | 16                                           | 17 | 18 |
| 7 O  | 3.331936  | -6.121112 | -2.587140  | 1.763185  | -3.239153 | -1.369056 | 19                                           | 20 | 21 |
| 8 C  | 4.174842  | 0.336984  | -9.752604  | 2.209231  | 0.178324  | -5.160856 | 22                                           | 23 | 24 |
| 9 O  | -4.549392 | -7.000396 | -1.737981  | -2.407435 | -3.704450 | -0.919700 | 25                                           | 26 | 27 |
| 10 H | 3.756579  | 0.691101  | -11.735246 | 1.987896  | 0.365715  | -6.210025 | 28                                           | 29 | 30 |
| 11 C | 1.764562  | -4.821075 | -1.753479  | 0.933766  | -2.551203 | -0.927901 | 31                                           | 32 | 33 |
| 12 C | 2.796845  | 1.610012  | -7.872388  | 1.480027  | 0.851982  | -4.165888 | 34                                           | 35 | 36 |

|       |           |           |            |           |           |           |     |     |     |
|-------|-----------|-----------|------------|-----------|-----------|-----------|-----|-----|-----|
| 13 C  | -3.142562 | -5.429377 | -1.113962  | -1.662972 | -2.873103 | -0.589483 | 37  | 38  | 39  |
| 14 Ru | 0.880336  | 3.154160  | -2.736927  | 0.465854  | 1.669110  | -1.448320 | 40  | 41  | 42  |
| 15 H  | -5.217698 | 0.937384  | -0.680760  | -2.761087 | 0.496042  | -0.360243 | 43  | 44  | 45  |
| 16 Ru | -0.805975 | -2.939005 | -0.153260  | -0.426503 | -1.555255 | -0.081102 | 46  | 47  | 48  |
| 17 C  | 0.829634  | 3.498959  | -8.327955  | 0.439023  | 1.851569  | -4.406964 | 49  | 50  | 51  |
| 18 C  | -1.443460 | 5.106508  | -0.853379  | -0.763846 | 2.702248  | -0.451589 | 52  | 53  | 54  |
| 19 C  | -0.313837 | 4.619004  | -6.171067  | -0.166076 | 2.444272  | -3.265588 | 55  | 56  | 57  |
| 20 C  | -5.366509 | 0.502212  | 1.329620   | -2.839834 | 0.265759  | 0.703605  | 58  | 59  | 60  |
| 21 H  | 1.014851  | 3.395143  | -12.433647 | 0.537036  | 1.796632  | -6.579603 | 61  | 62  | 63  |
| 22 H  | -8.560897 | 2.889888  | 2.129674   | -4.530232 | 1.529263  | 1.126975  | 64  | 65  | 66  |
| 23 C  | 0.128443  | 4.258032  | -10.785887 | 0.067969  | 2.253254  | -5.707646 | 67  | 68  | 69  |
| 24 O  | -2.873803 | 6.414858  | 0.182392   | -1.520751 | 3.394596  | 0.096518  | 70  | 71  | 72  |
| 25 N  | -3.630703 | -1.137867 | 2.194329   | -1.921285 | -0.602134 | 1.161189  | 73  | 74  | 75  |
| 26 H  | 2.747598  | -7.417365 | 2.421409   | 1.453966  | -3.925101 | 1.281355  | 76  | 77  | 78  |
| 27 C  | -7.188258 | 1.564385  | 2.898775   | -3.803862 | 0.827837  | 1.533966  | 79  | 80  | 81  |
| 28 C  | -2.129764 | 6.509220  | -6.583271  | -1.127023 | 3.444531  | -3.483717 | 82  | 83  | 84  |
| 29 H  | -3.036919 | 7.440731  | -4.985761  | -1.607068 | 3.937465  | -2.638351 | 85  | 86  | 87  |
| 30 C  | -0.203177 | -4.722774 | 3.316381   | -0.107516 | -2.499184 | 1.754953  | 88  | 89  | 90  |
| 31 C  | -1.681078 | 6.132657  | -11.138567 | -0.889588 | 3.245263  | -5.894276 | 91  | 92  | 93  |
| 32 C  | 1.577069  | -6.594738 | 3.902474   | 0.834549  | -3.489785 | 2.065100  | 94  | 95  | 96  |
| 33 C  | -2.807435 | 7.259526  | -9.026113  | -1.485631 | 3.841576  | -4.776414 | 97  | 98  | 99  |
| 34 H  | -2.201719 | 6.725514  | -13.043083 | -1.165100 | 3.558989  | -6.902102 | 100 | 101 | 102 |
| 35 C  | -3.609822 | -1.854853 | 4.670572   | -1.910236 | -0.981546 | 2.471561  | 103 | 104 | 105 |
| 36 C  | -7.185316 | 0.889426  | 5.455975   | -3.802306 | 0.470664  | 2.887178  | 106 | 107 | 108 |
| 37 H  | -4.217518 | 8.745080  | -9.279987  | -2.231814 | 4.627697  | -4.910758 | 109 | 110 | 111 |
| 38 C  | -1.698857 | -3.744248 | 5.319081   | -0.898997 | -1.981371 | 2.814736  | 112 | 113 | 114 |
| 39 C  | -5.397000 | -0.818137 | 6.339377   | -2.855969 | -0.432939 | 3.354654  | 115 | 116 | 117 |
| 40 C  | 1.914999  | -7.441536 | 6.386971   | 1.013374  | -3.937891 | 3.379840  | 118 | 119 | 120 |
| 41 H  | 3.330276  | -8.889801 | 6.784094   | 1.762306  | -4.704280 | 3.589988  | 121 | 122 | 123 |
| 42 H  | -8.581823 | 1.684687  | 6.747974   | -4.541305 | 0.891498  | 3.570874  | 124 | 125 | 126 |
| 43 C  | -1.343351 | -4.601904 | 7.817099   | -0.710871 | -2.435223 | 4.136631  | 127 | 128 | 129 |
| 44 H  | -5.388458 | -1.379558 | 8.318320   | -2.851449 | -0.730031 | 4.401865  | 130 | 131 | 132 |
| 45 C  | 0.460346  | -6.439628 | 8.354594   | 0.243605  | -3.407705 | 4.421061  | 133 | 134 | 135 |
| 46 H  | -2.473153 | -3.822147 | 9.353588   | -1.308736 | -2.022593 | 4.949706  | 136 | 137 | 138 |
| 47 H  | 0.731694  | -7.088085 | 10.292412  | 0.387196  | -3.750853 | 5.446510  | 139 | 140 | 141 |
| 48 H  | 7.134322  | -2.347150 | -10.539543 | 3.775321  | -1.242058 | -5.577286 | 142 | 143 | 144 |
| 49 H  | 8.057706  | -3.066748 | -5.909851  | 4.263954  | -1.622853 | -3.127358 | 145 | 146 | 147 |
| 50 O  | -1.745552 | 0.033280  | -3.009709  | -0.923706 | 0.017611  | -1.592669 | 148 | 149 | 150 |
| 51 H  | -1.697896 | -0.593952 | -4.739673  | -0.898488 | -0.314306 | -2.508127 | 151 | 152 | 153 |
| 52 C  | 3.295517  | 5.760365  | -2.347837  | 1.743912  | 3.048254  | -1.242422 | 154 | 155 | 156 |
| 53 O  | 4.780583  | 7.354120  | -2.077953  | 2.529776  | 3.891633  | -1.099606 | 157 | 158 | 159 |

Number of elements of the density matrix on this node (used, total): 199365 396495

=====  
Numerical Integration : Voronoi Polyhedra (Te Velde) \*\*\* (parameters, tests) \*\*\*  
=====

General Accuracy Parameter : 4.50

Symmetry used in the points section: NOSYM

Summary of the Symmetry Unique Points:

|                                |               |
|--------------------------------|---------------|
| Nr. of used Symmetry Operators | 1             |
| Points in the Atomic Spheres   | 33332         |
| Points in the Atomic Polyhedra | 337809        |
| Points in the Outer Region     | 30332         |
| Total                          | 401473        |
| Sum of Weights                 | 161102.381433 |
| Total nr. of points:           | 401473        |
| Nr. of blocks:                 | 3137          |
| Block length:                  | 128           |
| Nr. of dummy points:           | 63            |

Test of Precision of the Numerical Integration Grid

Integral of the Total Core Density: 55.99998621786227  
Relative Error: -2.461E-07

=====  
B O N D I N G E N E R G Y \*\*\* (decomposition) \*\*\*  
=====

\*\*\* WARNING \*\*\*

The bond energy is computed as an energy difference between molecule and fragments. In particular when the fragments are single atoms, they are usually computed as SPHERICALLY SYMMETRIC and SPIN-RESTRICTED. Obviously, this usually does NOT represent the true atomic groundstate.

To obtain the 'real' bond energy, (atomic) correction terms must be applied for the true (multiplet) fragment ground state. See ref: E.J.Baerends, V.Branchadell, M.Sodupe, Chem.Phys.Lett.265 (1997) 481

General theoretical background on the bond energy decomposition scheme used here (Morokuma-Ziegler) can be found in the review paper:  
F.M. Bickelhaupt and E.J. Baerends,  
"Kohn-Sham Density Functional Theory: Predicting and Understanding Chemistry"  
In: Rev. Comput. Chem.; Lipkowitz, K. B. and Boyd, D. B., Eds.;  
Wiley-VCH: New York, 2000, Vol. 15, 1-86.

Symbols used in the Bickelhaupt-Baerends (BB) paper are given below to make the direct connection to that paper, where detailed explanations can be found on the meaning of the various terms.

|                            | hartree             | eV         | kcal/mol  | kJ/mol     |
|----------------------------|---------------------|------------|-----------|------------|
| Pauli Repulsion            |                     |            |           |            |
| Kinetic ( $\Delta T^0$ ):  | 154.348975084365549 | 4200.0493  | 96855.45  | 405243.18  |
| Delta $V^0$ Pauli Coulomb: | -80.187944879697682 | -2182.0250 | -50318.70 | -210533.42 |

Electronic Supplementary Information for Dalton Transactions  
 This journal is © The Royal Society of Chemistry 2009

|                                                                                               |                      |            |           |            |
|-----------------------------------------------------------------------------------------------|----------------------|------------|-----------|------------|
| Delta V*Pauli LDA-XC:                                                                         | -19.116489356578601  | -520.1861  | -11995.78 | -50190.34  |
| Delta V*Pauli GGA-Exchange:                                                                   | 1.115108514121914    | 30.3436    | 699.74    | 2927.72    |
| Delta V*Pauli GGA-Correlation:                                                                | -0.312320369335053   | -8.4987    | -195.98   | -820.00    |
| -----                                                                                         |                      |            |           |            |
| Total Pauli Repulsion:<br>(Total Pauli Repulsion =<br>Delta E*Pauli in BB paper)              | 55.847328992876129   | 1519.6831  | 35044.73  | 146627.14  |
| Steric Interaction                                                                            |                      |            |           |            |
| Pauli Repulsion (Delta E*Pauli):                                                              | 55.847328992876129   | 1519.6831  | 35044.73  | 146627.14  |
| Electrostatic Interaction:<br>(Electrostatic Interaction =<br>Delta V_elstat in the BB paper) | -11.890772067840190  | -323.5644  | -7461.57  | -31219.22  |
| -----                                                                                         |                      |            |           |            |
| Total Steric Interaction:<br>(Total Steric Interaction =<br>Delta E*0 in the BB paper)        | 43.956556925035940   | 1196.1188  | 27583.16  | 115407.92  |
| Orbital Interactions                                                                          |                      |            |           |            |
| A:                                                                                            | -57.206929126019418  | -1556.6797 | -35897.89 | -150196.77 |
| -----                                                                                         |                      |            |           |            |
| Total Orbital Interactions:                                                                   | -57.213653818249675  | -1556.8627 | -35902.11 | -150214.43 |
| Alternative Decomposition Orb.Int.                                                            |                      |            |           |            |
| Kinetic:                                                                                      | -141.780439776903364 | -3858.0421 | -88968.58 | -372244.49 |
| Coulomb:                                                                                      | 77.953462710139746   | 2121.2216  | 48916.54  | 204666.79  |
| XC:                                                                                           | 6.613323248513936    | 179.9577   | 4149.92   | 17363.28   |
| -----                                                                                         |                      |            |           |            |
| Total Orbital Interactions:                                                                   | -57.213653818249682  | -1556.8627 | -35902.11 | -150214.43 |
| Residu (E=Steric+OrbInt+Res):                                                                 | 0.000008245860843    | 0.0002     | 0.01      | 0.02       |
| Total Bonding Energy:                                                                         | -13.257088647352891  | -360.7437  | -8318.95  | -34806.48  |
| Summary of Bonding Energy (energy terms are taken from the energy decomposition above)        |                      |            |           |            |
| =====                                                                                         |                      |            |           |            |
| Electrostatic Energy:                                                                         | -11.890772067840190  | -323.5644  | -7461.57  | -31219.22  |
| Kinetic Energy:                                                                               | 12.568535307462184   | 342.0072   | 7886.88   | 32998.68   |
| Coulomb (Steric+OrbInt) Energy:                                                               | -2.234473923697095   | -60.8031   | -1402.15  | -5866.61   |
| XC Energy:                                                                                    | -11.700377963277804  | -318.3835  | -7342.10  | -30719.34  |
| -----                                                                                         |                      |            |           |            |
| Total Bonding Energy:                                                                         | -13.257088647352905  | -360.7437  | -8318.95  | -34806.48  |

Correction terms (incorporated in energies above; only for test purposes):

1. Indication of fit-quality: 1st-order fit-correction used in the energy (hartree): -0.0023568398
2. Electrostatic (Fit correction): 0.0000000000

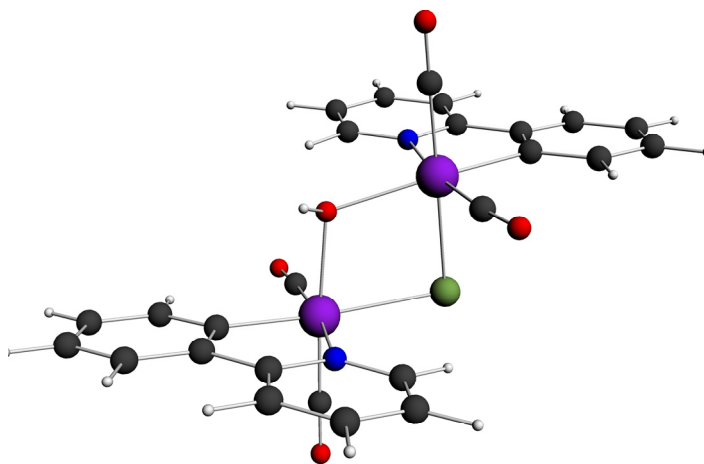

Figure 3

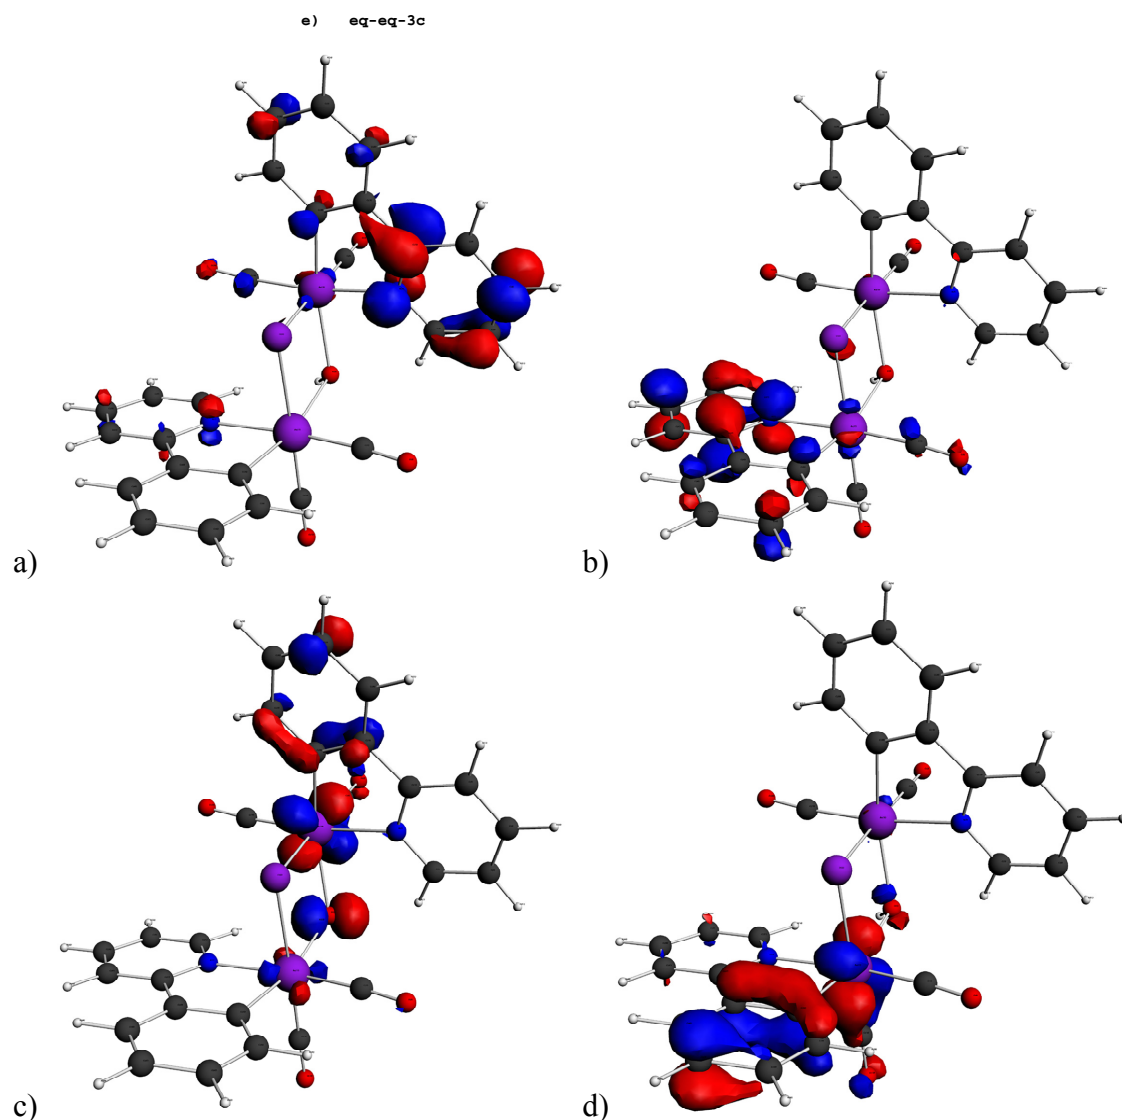

```
*****  
*  
* -----  
* Amsterdam Density Functional (ADF)      2007.01  August 20, 2007  
* -----  
*                                         Build 200708202008  
*  
*  
*          =====  
*          | A D F |  
*          =====  
*  
* Online information and documentation: http://www.scm.com  
* E-mail: support@scm.com info@scm.com  
*  
* Scientific publications using ADF results must be properly referenced  
* See the User Manuals (or the web site) for recommended citations  
* The terms and conditions of the End User License Agreement apply to  
* the use of ADF, http://www.scm.com/Sales/LicAgreement.html  
*  
* ***** macintel *****  
ADF 2007.01 RunTime: Jul25-2008 11:18:28  
equatorial-OH
```

```
=====  
A T T A C H E D   F I L E S  
=====
```

=====
   
M O D E L P A R A M E T E R S
   
=====

DENSITY FUNCTIONAL POTENTIAL (scf)
   
LDA: VWN
   
Gradient Corrections: Becke88 Perdew86 == Not Default ==
   
SPIN (restricted / unrestr.)
   
Molecule: Restricted
   
Fragments: Restricted
   
OTHER ASPECTS
   
Relativistic Corrections: ---
   
Core Treatment: Frozen Orbital(s)
   
Electric Field: ---
   
Hyperfine or Zeeman Interaction: ---

Fragment File(s)
   
-----

C:
   
file : t21.C
   
jobid: ADF 2007.01 RunTime: Jul25-2008 11:18:26
   
title: Carbon (TZP)
   
H:
   
file : t21.H
   
jobid: ADF 2007.01 RunTime: Jul25-2008 11:18:22
   
title: Hydrogen (TZP)
   
O:
   
file : t21.O
   
jobid: ADF 2007.01 RunTime: Jul25-2008 11:18:25
   
title: Oxygen (TZP)
   
N:
   
file : t21.N
   
jobid: ADF 2007.01 RunTime: Jul25-2008 11:18:23
   
title: Nitrogen (TZP)
   
Ru:
   
file : t21.Ru
   
jobid: ADF 2007.01 RunTime: Jul25-2008 11:18:24
   
title: Ruthenium (TZP, 3d frozen)
   
Cl:
   
file : t21.Cl
   
jobid: ADF 2007.01 RunTime: Jul25-2008 11:18:24
   
title: Chlorine (TZP)

\*\*\*\*\*
   
\* R U N T Y P E : GEOMETRY OPTIMIZATION \*
   
\*\*\*\*\*

=====  
Geometry Convergence Tests  
=====

Energy old : -13.24889219
   
new : -13.24890281

Convergence tests:
   
(Energies in hartree, Gradients in hartree/angstr or radian, Lengths in angstrom, Angles in degrees)

| Item             | Value       | Criterion  | Conv. | Ratio      |
|------------------|-------------|------------|-------|------------|
| change in energy | -0.00001062 | 0.00100000 | YES   | 2.00418792 |
| gradient max     | 0.00080779  | 0.00100000 | YES   | 0.65595582 |
| gradient rms     | 0.00012611  | 0.00066667 | YES   | 0.76766240 |
| cart. step max   | 0.00479489  | 0.01000000 | YES   | 0.83523059 |
| cart. step rms   | 0.00147795  | 0.00666667 | YES   | 0.82208823 |

prediction dE : -0.00001030

\*\*\*\*\*
   
Geometry CONVERGED
   
\*\*\*\*\*

\*\*\*\*\*
   
\* Final Geometry \*
   
\*\*\*\*\*

Coordinates (Cartesian)
   
=====

| Atom  | bohr      |           |           | angstrom  |           |           | Geometric Variables   |    |    |
|-------|-----------|-----------|-----------|-----------|-----------|-----------|-----------------------|----|----|
|       | X         | Y         | Z         | X         | Y         | Z         | (0:frozen, *:LT par.) |    |    |
| 1 C   | 6.369117  | -0.665645 | -5.685543 | 3.370391  | -0.352244 | -3.008660 | 1                     | 2  | 3  |
| 2 H   | 2.263105  | -0.531502 | -5.205765 | 1.197584  | -0.281259 | -2.754772 | 4                     | 5  | 6  |
| 3 O   | -0.218465 | 7.159612  | -5.134079 | -0.115607 | 3.788703  | -2.716837 | 7                     | 8  | 9  |
| 4 C   | 4.113426  | 0.179575  | -4.634285 | 2.176732  | 0.094498  | -2.452358 | 10                    | 11 | 12 |
| 5 C   | 8.634730  | 0.334521  | -4.759423 | 4.569303  | 0.177021  | -2.518978 | 13                    | 14 | 15 |
| 6 O   | -1.257272 | -0.101801 | -2.719256 | -0.665320 | -0.053871 | -1.438968 | 16                    | 17 | 18 |
| 7 C   | 0.121980  | 1.920057  | -3.565148 | 0.064549  | 2.993901  | -1.488659 | 19                    | 20 | 21 |
| 8 N   | 4.056930  | 5.657652  | -2.784851 | 2.146845  | 1.016050  | -1.473680 | 22                    | 23 | 24 |
| 9 O   | 3.420343  | -5.913892 | -2.138570 | 1.809968  | -3.129497 | -1.131683 | 25                    | 26 | 27 |
| 10 C  | 8.567408  | 2.139412  | -2.851731 | 4.533677  | 1.132128  | -1.509071 | 28                    | 29 | 30 |
| 11 O  | -4.451440 | -7.137537 | -2.601053 | -2.355601 | -3.777022 | -1.376418 | 31                    | 32 | 33 |
| 12 H  | 10.313456 | 2.941114  | -2.119832 | 5.457646  | 1.556371  | -1.121767 | 34                    | 35 | 36 |
| 13 C  | 1.701283  | -4.815330 | -1.322410 | 0.900280  | -2.548163 | -0.699789 | 37                    | 38 | 39 |
| 14 C  | 6.235506  | 2.948209  | -1.870660 | 3.299688  | 1.560125  | -0.989911 | 40                    | 41 | 42 |
| 15 C  | -3.215439 | -5.654511 | -1.547765 | -1.701537 | -2.992736 | -0.819042 | 43                    | 44 | 45 |
| 16 Ru | 0.614253  | 3.260090  | -1.003264 | 0.336339  | 1.725165  | -0.530904 | 46                    | 47 | 48 |
| 17 H  | -5.814253 | 0.532354  | -0.485635 | -3.076770 | 0.281710  | -0.256987 | 49                    | 50 | 51 |
| 18 Ru | -1.179587 | -3.272683 | 0.117677  | -0.624211 | -1.731829 | 0.062272  | 52                    | 53 | 54 |
| 19 C  | 5.886932  | 4.884327  | 0.072992  | 3.115230  | 2.584674  | 0.038626  | 55                    | 56 | 57 |
| 20 C  | -2.037224 | 4.732528  | 0.848665  | -1.078053 | -2.504346 | 0.449094  | 58                    | 59 | 60 |
| 21 C  | 3.360488  | 5.540316  | 0.710839  | 1.778294  | 2.931809  | 0.376160  | 61                    | 62 | 63 |
| 22 C  | -6.102097 | -0.169609 | 1.427320  | -3.229091 | -0.089753 | 0.755305  | 64                    | 65 | 66 |



|       |           |            |           |           |           |           |     |     |     |
|-------|-----------|------------|-----------|-----------|-----------|-----------|-----|-----|-----|
| 23 C1 | 1.425481  | -0.009826  | 2.342444  | 0.754332  | -0.005199 | 1.239568  | 67  | 68  | 69  |
| 24 H  | 9.874958  | 5.537286   | 0.811121  | 5.225603  | 2.930206  | 0.429227  | 70  | 71  | 72  |
| 25 H  | -9.421254 | 2.066106   | 2.147781  | -4.985513 | 1.093336  | 1.136557  | 73  | 74  | 75  |
| 26 C  | 7.940970  | 6.077535   | 1.276171  | 4.202181  | 3.216093  | 0.675320  | 76  | 77  | 78  |
| 27 O  | -3.591994 | 5.801516   | 1.981393  | -1.900801 | 3.070030  | 1.048508  | 79  | 80  | 81  |
| 28 N  | -4.401705 | -1.868630  | 2.252779  | -2.329282 | -0.988836 | 1.192119  | 82  | 83  | 84  |
| 29 H  | 2.097671  | -8.025718  | 2.509312  | 1.110040  | -4.247027 | 1.327871  | 85  | 86  | 87  |
| 30 C  | -8.098027 | 0.683702   | 2.903814  | -4.285292 | 0.361799  | 1.536632  | 88  | 89  | 90  |
| 31 C  | 2.999875  | 7.454945   | 2.507439  | 1.587465  | 3.944987  | 1.326880  | 91  | 92  | 93  |
| 32 H  | 1.095687  | 8.038616   | 3.034557  | 0.579812  | 4.253852  | 1.605819  | 94  | 95  | 96  |
| 33 C  | -0.997680 | -5.482616  | 3.365326  | -0.527949 | -2.901275 | 1.780854  | 97  | 98  | 99  |
| 34 C  | 7.530541  | 7.944644   | 3.083342  | 3.984991  | 4.204125  | 1.631634  | 100 | 101 | 102 |
| 35 C  | 0.743412  | -7.400660  | 3.930012  | 0.393397  | -3.916260 | 2.079673  | 103 | 104 | 105 |
| 36 C  | 5.049316  | 8.641097   | 3.685759  | 2.671983  | 4.572671  | 1.950420  | 106 | 107 | 108 |
| 37 H  | 9.127203  | 8.852211   | 4.017939  | 4.829908  | 4.684388  | 2.126202  | 109 | 110 | 111 |
| 38 C  | -4.612623 | -2.851302  | 4.630372  | -2.440895 | -1.508844 | 2.450288  | 112 | 113 | 114 |
| 39 C  | -8.319111 | -0.261723  | 5.363352  | -4.402284 | -0.138498 | 2.838164  | 115 | 116 | 117 |
| 40 H  | 4.704574  | 10.111619  | 5.091203  | 2.489553  | 5.350839  | 2.694149  | 118 | 119 | 120 |
| 41 C  | -2.740404 | -4.775346  | 5.280884  | -1.450160 | -2.527004 | 2.794524  | 121 | 122 | 123 |
| 42 C  | -6.576128 | -2.026065  | 6.221383  | -3.479937 | -1.072147 | 3.292214  | 124 | 125 | 126 |
| 43 C  | 0.812658  | -8.537427  | 6.316090  | 0.430040  | -4.517812 | 3.342331  | 127 | 128 | 129 |
| 44 H  | 2.203255  | -10.011867 | 6.701890  | 1.165912  | -5.298052 | 3.546487  | 130 | 131 | 132 |
| 45 H  | -9.846029 | 0.371408   | 6.595026  | -5.210294 | 0.196540  | 3.489938  | 133 | 134 | 135 |
| 46 C  | -2.651275 | -5.918469  | 7.685618  | -1.402994 | -3.131919 | 4.067054  | 136 | 137 | 138 |
| 47 H  | -6.729686 | -2.792654  | 8.122458  | -3.561196 | -1.477809 | 4.298220  | 139 | 140 | 141 |
| 48 C  | -0.877501 | -7.787324  | 8.210380  | -0.464353 | -4.120874 | 4.344746  | 142 | 143 | 144 |
| 49 H  | -3.965542 | -5.339603  | 9.163951  | -2.098474 | -2.825596 | 4.849354  | 145 | 146 | 147 |
| 50 H  | -0.809240 | -8.657376  | 10.077128 | -0.428231 | -4.581286 | 5.332587  | 148 | 149 | 150 |
| 51 H  | 10.443824 | -0.290589  | -5.525648 | 5.526634  | -0.153773 | -2.924047 | 151 | 152 | 153 |
| 52 H  | 6.341482  | -2.084488  | -7.175879 | 3.355768  | -1.103064 | -3.797312 | 154 | 155 | 156 |
| 53 H  | -2.932914 | 0.242976   | -3.385036 | -1.552031 | 0.128577  | -1.791284 | 157 | 158 | 159 |

Number of elements of the density matrix on this node (used, total): 199365 396495

=====  
Numerical Integration : Voronoi Polyhedra (Te Velde) \*\*\* (parameters, tests) \*\*\*  
=====

General Accuracy Parameter : 4.50

Symmetry used in the points section: NOSYM

Summary of the Symmetry Unique Points:

|                                |               |
|--------------------------------|---------------|
| Nr. of used Symmetry Operators | 1             |
| Points in the Atomic Spheres   | 33332         |
| Points in the Atomic Polyhedra | 349674        |
| Points in the Outer Region     | 26941         |
| Total                          | 409947        |
| Sum of Weights                 | 160384.242351 |
| Total nr. of points:           | 409947        |
| Nr. of blocks:                 | 3203          |
| Block length:                  | 128           |
| Nr. of dummy points:           | 37            |

Test of Precision of the Numerical Integration Grid

=====  
Integral of the Total Core Density: 55.99998785758984  
Relative Error: -2.168E-07  
=====

=====  
B O N D I N G E N E R G Y \*\*\* (decomposition) \*\*\*  
=====

\*\*\* WARNING \*\*\*

The bond energy is computed as an energy difference between molecule and fragments. In particular when the fragments are single atoms, they are usually computed as SPHERICALLY SYMMETRIC and SPIN-RESTRICTED. Obviously, this usually does NOT represent the true atomic groundstate.

To obtain the 'real' bond energy, (atomic) correction terms must be applied for the true (multiplet) fragment ground state. See ref: E.J.Baerends, V.Branchadell, M.Sodupe, Chem.Phys.Lett.265 (1997) 481

General theoretical background on the bond energy decomposition scheme used here (Morokuma-Ziegler) can be found in the review paper:  
F.M. Bickelhaupt and E.J. Baerends,  
"Kohn-Sham Density Functional Theory: Predicting and Understanding Chemistry"  
In: Rev. Comput. Chem.; Lipkowitz, K. B. and Boyd, D. B., Eds.;  
Wiley-VCH: New York, 2000, Vol. 15, 1-86.

Symbols used in the Bickelhaupt-Baerends (BB) paper are given below to make the direct connection to that paper, where detailed explanations can be found on the meaning of the various terms.

|                                                        | hartree             | eV         | kcal/mol  | kJ/mol     |
|--------------------------------------------------------|---------------------|------------|-----------|------------|
| Pauli Repulsion                                        |                     |            |           |            |
| Kinetic (Delta T^0):                                   | 154.399220195618767 | 4201.4166  | 96886.98  | 405375.10  |
| Delta V^Pauli Coulomb:                                 | -80.216719556269538 | -2182.8080 | -50336.76 | -210608.97 |
| Delta V^Pauli LDA-XC:                                  | -19.113582529498611 | -520.1070  | -11993.96 | -50182.70  |
| Delta V^Pauli GGA-Exchange:                            | 1.113794427836140   | 30.3079    | 698.92    | 2924.27    |
| Delta V^Pauli GGA-Correlation:                         | -0.311815720113016  | -8.4849    | -195.67   | -818.67    |
| Total Pauli Repulsion:                                 | 55.870896817573744  | 1520.3245  | 35059.52  | 146689.02  |
| (Total Pauli Repulsion =<br>Delta E^Pauli in BB paper) |                     |            |           |            |
| Steric Interaction                                     |                     |            |           |            |
| Pauli Repulsion (Delta E^Pauli):                       | 55.870896817573744  | 1520.3245  | 35059.52  | 146689.02  |
| Electrostatic Interaction:                             | -11.894794954510189 | -323.6738  | -7464.10  | -31229.78  |
| (Electrostatic Interaction =                           |                     |            |           |            |

| Delta V_elstat in the BB paper)                                                        |                      |            |           |            |
|----------------------------------------------------------------------------------------|----------------------|------------|-----------|------------|
| Total Steric Interaction:                                                              | 43.976101863063555   | 1196.6506  | 27595.42  | 115459.24  |
| (Total Steric Interaction = Delta E*0 in the BB paper)                                 |                      |            |           |            |
| Orbital Interactions                                                                   |                      |            |           |            |
| A:                                                                                     | -57.218333794956862  | -1556.9901 | -35905.05 | -150226.71 |
| Total Orbital Interactions:                                                            | -57.225007166023019  | -1557.1717 | -35909.24 | -150244.24 |
| Alternative Decomposition Orb.Int.                                                     |                      |            |           |            |
| Kinetic:                                                                               | -141.842428243326282 | -3859.7289 | -89007.48 | -372407.24 |
| Coulomb:                                                                               | 78.002352872951008   | 2122.5520  | 48947.22  | 204795.15  |
| XC:                                                                                    | 6.615068204352172    | 180.0052   | 4151.02   | 17367.86   |
| Total Orbital Interactions:                                                            | -57.225007166023104  | -1557.1717 | -35909.24 | -150244.24 |
| Residu (E=Steric+OrbInt+Res):                                                          | -0.000011803947140   | -0.0003    | -0.01     | -0.03      |
| Total Bonding Energy:                                                                  | -13.248917106906605  | -360.5214  | -8313.82  | -34785.03  |
| Summary of Bonding Energy (energy terms are taken from the energy decomposition above) |                      |            |           |            |
| =====                                                                                  |                      |            |           |            |
| Electrostatic Energy:                                                                  | -11.894794954510189  | -323.6738  | -7464.10  | -31229.78  |
| Kinetic Energy:                                                                        | 12.556791952292485   | 341.6877   | 7879.51   | 32967.85   |
| Coulomb (Steric+OrbInt) Energy:                                                        | -2.214378487265677   | -60.2563   | -1389.54  | -5813.85   |
| XC Energy:                                                                             | -11.696535617423313  | -318.2789  | -7339.69  | -30709.25  |
| Total Bonding Energy:                                                                  | -13.248917106906694  | -360.5214  | -8313.82  | -34785.03  |

Correction terms (incorporated in energies above; only for test purposes):

1. Indication of fit-quality: 1st-order fit-correction used in the energy (hartree): -0.0040950644
2. Electrostatic (Fit correction): 0.0000000000

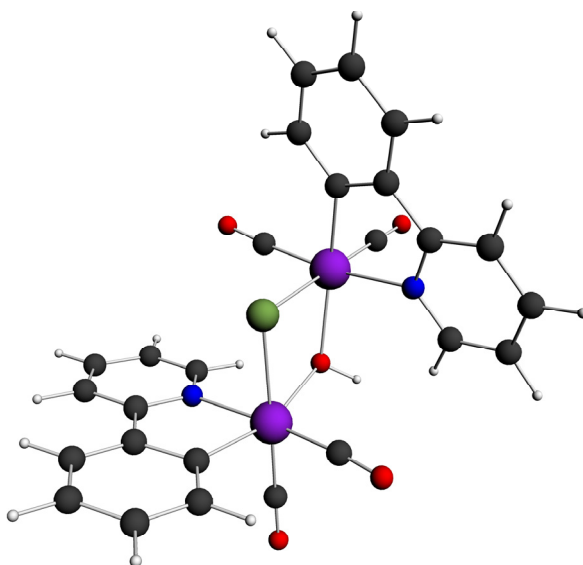

Figure 4

2. **Optimized Fragments**





Electronic Supplementary Information for Dalton Transactions  
 This journal is © The Royal Society of Chemistry 2009

|                                                                                               | hartree                    | eV               | kcal/mol         | kJ/mol           |
|-----------------------------------------------------------------------------------------------|----------------------------|------------------|------------------|------------------|
| <b>Pauli Repulsion</b>                                                                        |                            |                  |                  |                  |
| Kinetic (Delta T <sup>0</sup> ):                                                              | 78.012195225461952         | 2122.8198        | 48953.40         | 204820.99        |
| Delta V*Pauli Coulomb:                                                                        | -40.675041822245653        | -1106.8242       | -25523.98        | -106792.31       |
| Delta V*Pauli LDA-XC:                                                                         | -9.649056020242478         | -262.5642        | -6054.87         | -25333.59        |
| Delta V*Pauli GGA-Exchange:                                                                   | 0.562664875695791          | 15.3109          | 353.08           | 1477.28          |
| Delta V*Pauli GGA-Correlation:                                                                | -0.157410669760677         | -4.2834          | -98.78           | -413.28          |
| <b>Total Pauli Repulsion:</b>                                                                 | <b>28.093351588908934</b>  | <b>764.4590</b>  | <b>17628.85</b>  | <b>73759.08</b>  |
| (Total Pauli Repulsion =<br>Delta E*Pauli in BB paper)                                        |                            |                  |                  |                  |
| <b>Steric Interaction</b>                                                                     |                            |                  |                  |                  |
| Pauli Repulsion (Delta E*Pauli):                                                              | 28.093351588908934         | 764.4590         | 17628.85         | 73759.08         |
| Electrostatic Interaction:                                                                    | -5.982436459880714         | -162.7904        | -3754.04         | -15706.88        |
| (Electrostatic Interaction =<br>Delta V_elstat in the BB paper)                               |                            |                  |                  |                  |
| <b>Total Steric Interaction:</b>                                                              | <b>22.110915129028221</b>  | <b>601.6686</b>  | <b>13874.81</b>  | <b>58052.20</b>  |
| (Total Steric Interaction =<br>Delta E*0 in the BB paper)                                     |                            |                  |                  |                  |
| <b>Orbital Interactions</b>                                                                   |                            |                  |                  |                  |
| A:                                                                                            | -29.043658181131701        | -790.3182        | -18225.17        | -76254.11        |
| <b>Total Orbital Interactions:</b>                                                            | <b>-29.045414642223932</b> | <b>-790.3659</b> | <b>-18226.27</b> | <b>-76258.73</b> |
| <b>Alternative Decomposition Orb.Int.</b>                                                     |                            |                  |                  |                  |
| Kinetic:                                                                                      | -71.474184449118042        | -1944.9115       | -44850.73        | -187655.44       |
| Coulomb:                                                                                      | 39.440996494662556         | 1073.2441        | 24749.60         | 103552.32        |
| XC:                                                                                           | 2.987773312231604          | 81.3014          | 1874.86          | 7844.40          |
| <b>Total Orbital Interactions:</b>                                                            | <b>-29.045414642223882</b> | <b>-790.3659</b> | <b>-18226.27</b> | <b>-76258.73</b> |
| Residu (E=Steric+OrbInt+Res):                                                                 | 0.000003555391648          | 0.0001           | 0.00             | 0.01             |
| <b>Total Bonding Energy:</b>                                                                  | <b>-6.934495957804062</b>  | <b>-188.6972</b> | <b>-4351.46</b>  | <b>-18206.52</b> |
| <b>Summary of Bonding Energy (energy terms are taken from the energy decomposition above)</b> |                            |                  |                  |                  |
| Electrostatic Energy:                                                                         | -5.982436459880714         | -162.7904        | -3754.04         | -15706.88        |
| Kinetic Energy:                                                                               | 6.538010776343910          | 177.9083         | 4102.66          | 17165.54         |
| Coulomb (Steric+OrbInt) Energy:                                                               | -1.234041772191446         | -33.5800         | -774.37          | -3239.98         |
| XC Energy:                                                                                    | -6.256028502075759         | -170.2352        | -3925.72         | -16425.20        |
| <b>Total Bonding Energy:</b>                                                                  | <b>-6.934495957804010</b>  | <b>-188.6972</b> | <b>-4351.46</b>  | <b>-18206.52</b> |

Correction terms (incorporated in energies above; only for test purposes):

1. Indication of fit-quality: 1st-order fit-correction used in the energy (hartree): -0.0034219536
2. Electrostatic (Fit correction): 0.0000000000



\*\*\*\*\*  
Geometry CONVERGED  
\*\*\*\*\*

\*\*\*\*\*  
\* Final Geometry \*  
\*\*\*\*\*

Coordinates (Cartesian)  
=====

| Atom  | bohr      |           |           | angstrom  |           |           | Geometric Variables<br>(0:frozen, *:LT par.) |    |    |
|-------|-----------|-----------|-----------|-----------|-----------|-----------|----------------------------------------------|----|----|
|       | X         | Y         | Z         | X         | Y         | Z         |                                              |    |    |
| 1 C   | 6.387238  | -0.979756 | -5.349970 | 3.379981  | -0.518464 | -2.831082 | 1                                            | 2  | 3  |
| 2 H   | 2.221457  | -0.663143 | -4.928822 | 1.175545  | -0.350920 | -2.608220 | 4                                            | 5  | 6  |
| 3 O   | -0.136317 | 7.454149  | -4.931640 | -0.072136 | 3.944566  | -2.609711 | 7                                            | 8  | 9  |
| 4 C   | 4.126872  | -0.030698 | -4.393688 | 2.183846  | -0.016245 | -2.325039 | 10                                           | 11 | 12 |
| 5 C   | 8.660424  | 0.044476  | -4.462386 | 4.582899  | 0.023536  | -2.361393 | 13                                           | 14 | 15 |
| 6 O   | -1.227188 | 0.501074  | -3.495287 | -0.649400 | 0.265157  | -1.849626 | 16                                           | 17 | 18 |
| 7 C   | 0.193244  | 5.833202  | -3.457565 | 0.102260  | 3.086797  | -1.829665 | 19                                           | 20 | 21 |
| 8 N   | 4.090137  | 1.827693  | -2.664649 | 2.164407  | 0.967173  | -1.410071 | 22                                           | 23 | 24 |
| 9 C   | 8.601838  | 1.949009  | -2.649143 | 4.551897  | 1.031371  | -1.401866 | 25                                           | 26 | 27 |
| 10 H  | 10.354509 | 2.746888  | -1.925685 | 5.479370  | 1.453591  | -1.019028 | 28                                           | 29 | 30 |
| 11 C  | 6.264509  | 2.833747  | -1.736782 | 3.315035  | 1.499554  | -0.919066 | 31                                           | 32 | 33 |
| 12 Ru | 0.595691  | 3.257744  | -1.059049 | 0.315226  | 1.723924  | -0.560424 | 34                                           | 35 | 36 |
| 13 C  | 5.905685  | 4.799024  | 0.182379  | 3.125154  | 2.539534  | 0.096511  | 37                                           | 38 | 39 |
| 14 C  | -2.145700 | 4.451711  | 0.838695  | -1.135456 | 2.355744  | 0.443818  | 40                                           | 41 | 42 |
| 15 C  | 3.360263  | 5.355379  | 0.884563  | 1.778175  | 2.833945  | 0.468090  | 43                                           | 44 | 45 |
| 16 Cl | 0.986773  | -0.177106 | 2.121165  | 0.522178  | -0.093721 | 1.122472  | 46                                           | 47 | 48 |
| 17 H  | 9.898472  | 5.630551  | 0.717698  | 5.238046  | 2.979559  | 0.379789  | 49                                           | 50 | 51 |
| 18 C  | 7.964584  | 6.082895  | 1.281053  | 4.214676  | 3.218929  | 0.677904  | 52                                           | 53 | 54 |
| 19 O  | -3.799608 | 5.240050  | 2.079928  | -2.010666 | 2.772915  | 1.100651  | 55                                           | 56 | 57 |
| 20 C  | 3.035782  | 7.257115  | 2.723521  | 1.606467  | 3.840300  | 1.441225  | 58                                           | 59 | 60 |
| 21 H  | 1.129689  | 7.755865  | 3.334230  | 0.597806  | 4.104227  | 1.764399  | 61                                           | 62 | 63 |
| 22 C  | 7.566059  | 7.947843  | 3.096690  | 4.003786  | 4.205817  | 1.638698  | 64                                           | 65 | 66 |
| 23 C  | 5.078169  | 8.526707  | 3.814934  | 2.687251  | 4.512139  | 2.018776  | 67                                           | 68 | 69 |
| 24 H  | 9.164842  | 8.938697  | 3.943989  | 4.849825  | 4.730155  | 2.087069  | 70                                           | 71 | 72 |
| 25 H  | 4.736958  | 9.982149  | 5.242766  | 2.506690  | 5.282326  | 2.774352  | 73                                           | 74 | 75 |
| 26 H  | 10.470924 | -0.649259 | -5.171093 | 5.540974  | -0.343573 | -2.736425 | 76                                           | 77 | 78 |
| 27 H  | 6.363095  | -2.493707 | -6.748879 | 3.367205  | -1.319613 | -3.571353 | 79                                           | 80 | 81 |
| 28 H  | -2.496522 | 1.393468  | -4.483495 | -1.321102 | 0.737391  | -2.372563 | 82                                           | 83 | 84 |

Number of elements of the density matrix on this node (used, total): 55440 111628

=====  
Numerical Integration : Voronoi Polyhedra (Te Velde) \*\*\* (parameters, tests) \*\*\*  
=====

General Accuracy Parameter : 4.50

Symmetry used in the points section: NOSYM

Summary of the Symmetry Unique Points:

| -----                          |               |
|--------------------------------|---------------|
| Nr. of used Symmetry Operators | 1             |
| Points in the Atomic Spheres   | 17756         |
| Points in the Atomic Polyhedra | 176229        |
| Points in the Outer Region     | 22419         |
| -----                          |               |
| Total                          | 216404        |
| Sum of Weights                 | 129472.837888 |
| Total nr. of points:           | 216404        |
| Nr. of blocks:                 | 1691          |
| Block length:                  | 128           |
| Nr. of dummy points:           | 44            |

Test of Precision of the Numerical Integration Grid  
=====

Integral of the Total Core Density: 27.99999421004810  
Relative Error: -2.068E-07

=====  
BONDING ENERGY \*\*\* (decomposition) \*\*\*  
=====

\*\*\* WARNING \*\*\*

The bond energy is computed as an energy difference between molecule and fragments. In particular when the fragments are single atoms, they are usually computed as SPHERICALLY SYMMETRIC and SPIN-RESTRICTED. Obviously, this usually does NOT represent the true atomic groundstate.

To obtain the 'real' bond energy, (atomic) correction terms must be applied for the true (multiplet) fragment ground state. See ref: E.J.Baerends, V.Branchadell, M.Sodupe, Chem.Phys.Lett.265 (1997) 481

General theoretical background on the bond energy decomposition scheme used here (Morokuma-Ziegler) can be found in the review paper:  
F.M. Bickelhaupt and E.J. Baerends,  
"Kohn-Sham Density Functional Theory: Predicting and Understanding Chemistry"  
In: Rev. Comput. Chem.; Lipkowitz, K. B. and Boyd, D. B., Eds.;  
Wiley-VCH: New York, 2000, Vol. 15, 1-86.

Symbols used in the Bickelhaupt-Baerends (BB) paper are given below to make the direct connection to that paper, where detailed explanations can be found on the meaning of the various terms.

hartree                      eV                      kcal/mol                      kJ/mol



|                                                                                               |                     |            |           |            |
|-----------------------------------------------------------------------------------------------|---------------------|------------|-----------|------------|
| Pauli Repulsion                                                                               |                     |            |           |            |
| Kinetic (Delta T^0):                                                                          | 78.090927388899843  | 2124.9623  | 49002.80  | 205027.70  |
| Delta V^Pauli Coulomb:                                                                        | -40.740246704831449 | -1108.5985 | -25564.89 | -106963.50 |
| Delta V^Pauli LDA-XC:                                                                         | -9.656663342387995  | -262.7712  | -6059.65  | -25353.57  |
| Delta V^Pauli GGA-Exchange:                                                                   | 0.563139034376853   | 15.3238    | 353.38    | 1478.52    |
| Delta V^Pauli GGA-Correlation:                                                                | -0.157447556337659  | -4.2844    | -98.80    | -413.38    |
| Total Pauli Repulsion:<br>(Total Pauli Repulsion =<br>Delta E^Pauli in the BB paper)          | 28.099708819719595  | 764.6320   | 17632.84  | 73775.78   |
| Steric Interaction                                                                            |                     |            |           |            |
| Pauli Repulsion (Delta E^Pauli):                                                              | 28.099708819719595  | 764.6320   | 17632.84  | 73775.78   |
| Electrostatic Interaction:<br>(Electrostatic Interaction =<br>Delta V_elstat in the BB paper) | -5.989879800056546  | -162.9929  | -3758.71  | -15726.43  |
| Total Steric Interaction:<br>(Total Steric Interaction =<br>Delta E^0 in the BB paper)        | 22.109829019663049  | 601.6391   | 13874.13  | 58049.35   |
| Orbital Interactions                                                                          |                     |            |           |            |
| A:                                                                                            | -29.037362663871956 | -790.1468  | -18221.22 | -76237.58  |
| Total Orbital Interactions:                                                                   | -29.039431224818436 | -790.2031  | -18222.52 | -76243.02  |
| Alternative Decomposition Orb.Int.                                                            |                     |            |           |            |
| Kinetic:                                                                                      | -71.541387040589029 | -1946.7402 | -44892.90 | -187831.89 |
| Coulomb:                                                                                      | 39.509469368763966  | 1075.1074  | 24792.57  | 103732.10  |
| XC:                                                                                           | 2.992486447006710   | 81.4297    | 1877.81   | 7856.77    |
| Total Orbital Interactions:                                                                   | -29.039431224818351 | -790.2031  | -18222.52 | -76243.02  |
| Residu (E=Steric+OrbInt+Res):                                                                 | 0.000019593111755   | 0.0005     | 0.01      | 0.05       |
| Total Bonding Energy:                                                                         | -6.929582612043632  | -188.5635  | -4348.38  | -18193.62  |
| Summary of Bonding Energy (energy terms are taken from the energy decomposition above)        |                     |            |           |            |
| Electrostatic Energy:                                                                         | -5.989879800056546  | -162.9929  | -3758.71  | -15726.43  |
| Kinetic Energy:                                                                               | 6.549540348310813   | 178.2221   | 4109.90   | 17195.82   |
| Coulomb (Steric+OrbInt) Energy:                                                               | -1.230757742955731  | -33.4906   | -772.31   | -3231.35   |
| XC Energy:                                                                                    | -6.258485417342092  | -170.3021  | -3927.26  | -16431.65  |
| Total Bonding Energy:                                                                         | -6.929582612043555  | -188.5635  | -4348.38  | -18193.62  |

Correction terms (incorporated in energies above; only for test purposes):

1. Indication of fit-quality: 1st-order fit-correction used in the energy (hartree): -0.0037568124
2. Electrostatic (Fit correction): 0.0000000000

c) Optimized fragment 5

```

*****
*
* -----
* Amsterdam Density Functional (ADF)      2007.01  August 20, 2007
* -----
*                               Build 200708202008
*
*
*                               =====
*                               | A D F |
*                               =====
*
* Online information and documentation: http://www.scm.com
* E-mail: support@scm.com  info@scm.com
*
* Scientific publications using ADF results must be properly referenced
* See the User Manuals (or the web site) for recommended citations
* The terms and conditions of the End User License Agreement apply to
* the use of ADF, http://www.scm.com/Sales/LicAgreement.html
*
***** macintel *****

ADF 2007.01 RunTime: Jul24-2008 13:27:34
RuCO2 fragment
    
```

=====  
 A T T A C H E D F I L E S  
 =====

=====  
 M O D E L P A R A M E T E R S  
 =====

```

DENSITY FUNCTIONAL POTENTIAL (scf)
LDA:                               VWN
Gradient Corrections:              Becke88 Perdew86      == Not Default ==

SPIN (restricted / unrestr.)
Molecule:                          Restricted
Fragments:                           Restricted

OTHER ASPECTS
Relativistic Corrections:           ---
Core Treatment:                      Frozen Orbital(s)

Electric Field:                       ---
    
```

Hyperfine or Zeeman Interaction: ---

Fragment File(s)

O: file : t21.O  
jobid: ADF 2007.01 RunTime: Jul24-2008 13:27:31  
title: Oxygen (TZP)

C: file : t21.C  
jobid: ADF 2007.01 RunTime: Jul24-2008 13:27:30  
title: Carbon (TZP)

H: file : t21.H  
jobid: ADF 2007.01 RunTime: Jul24-2008 13:27:21  
title: Hydrogen (TZP)

Ru: file : t21.Ru  
jobid: ADF 2007.01 RunTime: Jul24-2008 13:27:29  
title: Ruthenium (TZP, 3d frozen)

N: file : t21.N  
jobid: ADF 2007.01 RunTime: Jul24-2008 13:27:28  
title: Nitrogen (TZP)

\*\*\*\*\*  
\* R U N T Y P E : GEOMETRY OPTIMIZATION \*  
\*\*\*\*\*

=====  
Geometry Convergence Tests  
=====

Energy old : -6.09826808  
new : -6.09829594

Convergence tests:  
(Energies in hartree, Gradients in hartree/angstr or radian, Lengths in angstrom, Angles in degrees)

| Item             | Value       | Criterion  | Conv. | Ratio      |
|------------------|-------------|------------|-------|------------|
| change in energy | -0.00002786 | 0.00100000 | YES   | 1.22114636 |
| gradient max     | 0.00098790  | 0.00100000 | YES   | 0.25000621 |
| gradient rms     | 0.00029690  | 0.00066667 | YES   | 0.19603908 |
| cart. step max   | 0.00102369  | 0.01000000 | YES   | 0.65514899 |
| cart. step rms   | 0.00035518  | 0.00666667 | YES   | 0.63003253 |

prediction dE : -0.00000068

\*\*\*\*\*  
Geometry CONVERGED  
\*\*\*\*\*

\*\*\*\*\*  
\* Final Geometry \*  
\*\*\*\*\*

Coordinates (Cartesian)

| Atom | bohr      |           |           | angstrom  |           |           | Geometric Variables<br>(0:frozen, *:LT par.) |    |    |
|------|-----------|-----------|-----------|-----------|-----------|-----------|----------------------------------------------|----|----|
|      | X         | Y         | Z         | X         | Y         | Z         |                                              |    |    |
| 1 O  | 3.432588  | -5.326613 | -2.655948 | 1.816447  | -2.818722 | -1.405467 | 1                                            | 2  | 3  |
| 2 O  | -4.270665 | -7.762778 | -1.975246 | -2.259939 | -4.107885 | -1.045255 | 4                                            | 5  | 6  |
| 3 C  | 1.653840  | -4.588469 | -1.645057 | 0.875174  | -2.428113 | -0.870527 | 7                                            | 8  | 9  |
| 4 C  | -3.147188 | -6.047599 | -1.230986 | -1.665420 | -3.200251 | -0.651410 | 10                                           | 11 | 12 |
| 5 H  | -6.180124 | 0.064570  | -0.759304 | -3.270381 | 0.034169  | -0.401807 | 13                                           | 14 | 15 |
| 6 Ru | -1.341316 | -3.346244 | 0.053137  | -0.709794 | -1.770756 | 0.028119  | 16                                           | 17 | 18 |
| 7 C  | -6.227486 | -0.325704 | 1.263379  | -3.295444 | -0.172355 | 0.668552  | 19                                           | 20 | 21 |
| 8 H  | -9.536442 | 1.908919  | 2.010048  | -5.046468 | 1.010156  | 1.063672  | 22                                           | 23 | 24 |
| 9 N  | -4.396042 | -1.850240 | 2.174604  | -2.326285 | -0.979105 | 1.150751  | 25                                           | 26 | 27 |
| 10 H | 2.385159  | -7.631134 | 2.386298  | 1.262172  | -4.038222 | 1.262775  | 28                                           | 29 | 30 |
| 11 C | -8.085734 | 0.691815  | 2.813040  | -4.278786 | 0.366093  | 1.488596  | 31                                           | 32 | 33 |
| 12 C | -0.683669 | -5.104385 | 3.397040  | -0.361782 | -2.701124 | 1.797636  | 34                                           | 35 | 36 |
| 13 C | 1.224543  | -6.850310 | 3.895970  | 0.648000  | -3.625028 | 2.061659  | 37                                           | 38 | 39 |
| 14 C | -4.326629 | -2.473878 | 4.679979  | -2.289554 | -1.309120 | 2.476538  | 40                                           | 41 | 42 |
| 15 C | -8.033783 | 0.096247  | 5.388567  | -4.251295 | 0.050932  | 2.851507  | 43                                           | 44 | 45 |
| 16 C | -2.266848 | -4.195688 | 5.362854  | -1.199564 | -2.220262 | 2.837900  | 46                                           | 47 | 48 |
| 17 C | -6.151260 | -1.489204 | 6.323224  | -3.255106 | -0.788053 | 3.346106  | 49                                           | 50 | 51 |
| 18 C | 1.672279  | -7.614009 | 6.394972  | 0.884932  | -4.029160 | 3.384073  | 52                                           | 53 | 54 |
| 19 H | 3.186695  | -8.955598 | 6.783885  | 1.686326  | -4.739098 | 3.589877  | 55                                           | 56 | 57 |
| 20 H | -9.463900 | 0.859815  | 6.660226  | -5.008080 | 0.454994  | 3.524440  | 58                                           | 59 | 60 |
| 21 C | -1.774183 | -4.982154 | 7.850751  | -0.939857 | -2.636442 | 4.154439  | 61                                           | 62 | 63 |
| 22 H | -6.099732 | -1.969978 | 8.321340  | -3.227839 | -1.042468 | 4.403464  | 64                                           | 65 | 66 |
| 23 C | 0.182376  | -6.674613 | 8.362383  | 0.096509  | -3.532053 | 4.425183  | 67                                           | 68 | 69 |
| 24 H | -2.925826 | -4.270006 | 9.402585  | -1.548281 | -2.259590 | 4.975634  | 70                                           | 71 | 72 |
| 25 H | 0.532460  | -7.277951 | 10.299866 | 0.281765  | -3.851326 | 5.450454  | 73                                           | 74 | 75 |

Number of elements of the density matrix on this node (used, total): 43660 87571

=====  
Numerical Integration : Voronoi Polyhedra (Te Velde) \*\*\* (parameters, tests) \*\*\*  
=====

General Accuracy Parameter : 4.50

Symmetry used in the points section: NOSYM

Summary of the Symmetry Unique Points:  
-----

```

Nr. of used Symmetry Operators          1
Points in the Atomic Spheres            15772
Points in the Atomic Polyhedra          147049
Points in the Outer Region              23937
-----
Total                                   186758

Sum of Weights                          129334.420264

Total nr. of points:                    186758
Nr. of blocks:                          1460
Block length:                            128
Nr. of dummy points:                    122
    
```

Test of Precision of the Numerical Integration Grid

```

Integral of the Total Core Density:      27.99998586994408
Relative Error:                          -5.046E-07
    
```

===== BONDING ENERGY \*\*\* (decomposition) \*\*\* =====

\*\*\* WARNING \*\*\*

The bond energy is computed as an energy difference between molecule and fragments. In particular when the fragments are single atoms, they are usually computed as SPHERICALLY SYMMETRIC and SPIN-RESTRICTED. Obviously, this usually does NOT represent the true atomic groundstate.

To obtain the 'real' bond energy, (atomic) correction terms must be applied for the true (multiplet) fragment ground state. See ref: E.J.Baerends, V.Branchadell, M.Sodupe, Chem.Phys.Lett.265 (1997) 481

General theoretical background on the bond energy decomposition scheme used here (Morokuma-Ziegler) can be found in the review paper: F.M. Bickelhaupt and E.J. Baerends, "Kohn-Sham Density Functional Theory: Predicting and Understanding Chemistry" In: Rev. Comput. Chem.; Lipkowitz, K. B. and Boyd, D. B., Eds.; Wiley-VCH: New York, 2000, Vol. 15, 1-86.

Symbols used in the Bickelhaupt-Baerends (BB) paper are given below to make the direct connection to that paper, where detailed explanations can be found on the meaning of the various terms.

|                                                                                               | hartree                    | eV               | kcal/mol         | kJ/mol           |
|-----------------------------------------------------------------------------------------------|----------------------------|------------------|------------------|------------------|
| <b>Pauli Repulsion</b>                                                                        |                            |                  |                  |                  |
| Kinetic (Delta T <sup>0</sup> ):                                                              | 73.332841400617227         | 1995.4881        | 46017.06         | 192535.35        |
| Delta V <sup>0</sup> Pauli Coulomb:                                                           | -37.438322354316227        | -1018.7486       | -23492.90        | -98294.30        |
| Delta V <sup>0</sup> Pauli LDA-XC:                                                            | -9.009424462378178         | -245.1589        | -5653.50         | -23654.24        |
| Delta V <sup>0</sup> Pauli GGA-Exchange:                                                      | 0.498283894453412          | 13.5590          | 312.68           | 1308.24          |
| Delta V <sup>0</sup> Pauli GGA-Correlation:                                                   | -0.132704111812965         | -3.6111          | -83.27           | -348.41          |
| <b>Total Pauli Repulsion:</b>                                                                 | <b>27.250674366563267</b>  | <b>741.5286</b>  | <b>17100.06</b>  | <b>71546.64</b>  |
| (Total Pauli Repulsion =<br>Delta E <sup>0</sup> Pauli in BB paper)                           |                            |                  |                  |                  |
| <b>Steric Interaction</b>                                                                     |                            |                  |                  |                  |
| Pauli Repulsion (Delta E <sup>0</sup> Pauli):                                                 | 27.250674366563267         | 741.5286         | 17100.06         | 71546.64         |
| Electrostatic Interaction:                                                                    | -5.761726294126650         | -156.7845        | -3615.54         | -15127.41        |
| (Electrostatic Interaction =<br>Delta V <sub>elstat</sub> in the BB paper)                    |                            |                  |                  |                  |
| <b>Total Steric Interaction:</b>                                                              | <b>21.488948072436617</b>  | <b>584.7440</b>  | <b>13484.52</b>  | <b>56419.23</b>  |
| (Total Steric Interaction =<br>Delta E <sup>0</sup> in the BB paper)                          |                            |                  |                  |                  |
| <b>Orbital Interactions</b>                                                                   |                            |                  |                  |                  |
| A:                                                                                            | -27.580082041074277        | -750.4922        | -17306.76        | -72411.50        |
| <b>Total Orbital Interactions:</b>                                                            | <b>-27.587232614393123</b> | <b>-750.6868</b> | <b>-17311.25</b> | <b>-72430.27</b> |
| <b>Alternative Decomposition Orb.Int.</b>                                                     |                            |                  |                  |                  |
| Kinetic:                                                                                      | -67.577791473534973        | -1838.8853       | -42405.71        | -177425.47       |
| Coulomb:                                                                                      | 36.703290752354015         | 998.7474         | 23031.67         | 96364.48         |
| XC:                                                                                           | 3.287268106787864          | 89.4511          | 2062.79          | 8630.72          |
| <b>Total Orbital Interactions:</b>                                                            | <b>-27.587232614393095</b> | <b>-750.6868</b> | <b>-17311.25</b> | <b>-72430.27</b> |
| Residu (E=Steric+OrbInt+Res):                                                                 | -0.000010418539284         | -0.0003          | -0.01            | -0.03            |
| <b>Total Bonding Energy:</b>                                                                  | <b>-6.098294960495790</b>  | <b>-165.9430</b> | <b>-3826.74</b>  | <b>-16011.07</b> |
| <b>Summary of Bonding Energy (energy terms are taken from the energy decomposition above)</b> |                            |                  |                  |                  |
| Electrostatic Energy:                                                                         | -5.761726294126650         | -156.7845        | -3615.54         | -15127.41        |
| Kinetic Energy:                                                                               | 5.755049927082254          | 156.6029         | 3611.35          | 15109.88         |
| Coulomb (Steric+OrbInt) Energy:                                                               | -0.735042020501496         | -20.0015         | -461.25          | -1929.85         |
| XC Energy:                                                                                    | -5.356576572949868         | -145.7599        | -3361.30         | -14063.69        |
| <b>Total Bonding Energy:</b>                                                                  | <b>-6.098294960495759</b>  | <b>-165.9430</b> | <b>-3826.74</b>  | <b>-16011.07</b> |

Correction terms (incorporated in energies above; only for test purposes):

1. Indication of fit-quality: 1st-order fit-correction used in the energy (hartree): 0.0011431250
2. Electrostatic (Fit correction): 0.0000000000



```

17 C   -0.000011  0.000019 -0.000003
18 C   -0.000005  0.000005 -0.000004
19 H   -0.000005 -0.000010 -0.000010
20 H   -0.000006 -0.000010 -0.000002
21 C   -0.000011  0.000016 -0.000026
22 H    0.000013  0.000010  0.000001
23 C    0.000020 -0.000004  0.000002
24 H    0.000005  0.000005 -0.000003
25 H   -0.000005  0.000000 -0.000003
-----
current energy                -6.09829774 Hartree
abs of energy change          0.00000039  0.00100000  T
constrained gradient max      0.00008736  0.00010000  T
constrained gradient rms      0.00002166  0.00006667  T
gradient max                   0.00008736
gradient rms                    0.00002166
cart. step max                 0.00152354  0.01000000  T
cart. step rms                 0.00039146  0.00666667  T

Number of elements of the density matrix on this node (used, total):   43660   87571

=====
Numerical Integration : Voronoi Polyhedra (Te Velde) *** (parameters, tests) ***
=====

General Accuracy Parameter :                6.00

Symmetry used in the points section:  NOSYM

Summary of the Symmetry Unique Points:
-----
Nr. of used Symmetry Operators              1
Points in the Atomic Spheres                27088
Points in the Atomic Polyhedra              279001
Points in the Outer Region                  41010
-----
Total                                       347099

Sum of Weights                             164038.368546

Total nr. of points:      347099
Nr. of blocks:           2712
Block length:            128
Nr. of dummy points:     37

Test of Precision of the Numerical Integration Grid
=====
Integral of the Total Core Density:          27.99999959697438
Relative Error:                             -1.439E-08

=====
B O N D I N G   E N E R G Y *** (decomposition) ***
=====

*** WARNING ***

The bond energy is computed as an energy difference between molecule and
fragments. In particular when the fragments are single atoms, they are usually
computed as SPHERICALLY SYMMETRIC and SPIN-RESTRICTED. Obviously, this usually
does NOT represent the true atomic groundstate.

To obtain the 'real' bond energy, (atomic) correction terms must be applied
for the true (multiplet) fragment ground state. See ref: E.J.Baerends,
V.Branchadell, M.Sodupe, Chem.Phys.Lett.265 (1997) 481

General theoretical background on the bond energy decomposition scheme used
here (Morokuma-Ziegler) can be found in the review paper:
F.M. Bickelhaupt and E.J. Baerends,
"Kohn-Sham Density Functional Theory: Predicting and Understanding Chemistry"
In: Rev. Comput. Chem.; Lipkowitz, K. B. and Boyd, D. B., Eds.;
Wiley-VCH: New York, 2000, Vol. 15, 1-86.

Symbols used in the Bickelhaupt-Baerends (BB) paper are given below to make
the direct connection to that paper, where detailed explanations can be found
on the meaning of the various terms.

-----
hartree          eV          kcal/mol          kJ/mol
-----
Pauli Repulsion
Kinetic (Delta T^0):          73.404510087599604          1997.4383          46062.03          192723.51
Delta V^Pauli Coulomb:        -37.465673001850391          -1019.4928          -23510.07          -98366.11
Delta V^Pauli LDA-XC:         -9.016105574933075          -245.3407          -5657.69          -23671.78
Delta V^Pauli GGA-Exchange:    0.498326797969398          13.5602          312.70          1308.36
Delta V^Pauli GGA-Correlation: -0.132515758677335          -3.6059          -83.15          -347.92
-----
Total Pauli Repulsion:        27.288542550108197          742.5590          17123.82          71646.06
(Total Pauli Repulsion =
Delta E^Pauli in BB paper)

Steric Interaction
Pauli Repulsion (Delta E^Pauli): 27.288542550108197          742.5590          17123.82          71646.06
Electrostatic Interaction:      -5.769530285126825          -156.9969          -3620.44          -15147.90
(Electrostatic Interaction =
Delta V_elstat in the BB paper)
-----
Total Steric Interaction:      21.519012264981370          585.5621          13503.39          56498.16
(Total Steric Interaction =
Delta E^0 in the BB paper)

Orbital Interactions
A:                               -27.610623670532583          -751.3233          -17325.93          -72491.68
-----
Total Orbital Interactions:    -27.617317596370683          -751.5054          -17330.13          -72509.26

Alternative Decomposition Orb.Int.
Kinetic:                        -67.627405684926501          -1840.2353          -42436.84          -177555.73

```

Electronic Supplementary Information for Dalton Transactions  
This journal is © The Royal Society of Chemistry 2009

|                               |                     |           |           |           |
|-------------------------------|---------------------|-----------|-----------|-----------|
| Coulomb:                      | 36.723639962072056  | 999.3011  | 23044.43  | 96417.90  |
| XC:                           | 3.286448126483814   | 89.4288   | 2062.28   | 8628.57   |
| Total Orbital Interactions:   | -27.617317596370633 | -751.5054 | -17330.13 | -72509.26 |
| Residu (E=Steric+OrbInt+Res): | 0.000007593366699   | 0.0002    | 0.00      | 0.02      |
| Total Bonding Energy:         | -6.098297738022613  | -165.9431 | -3826.74  | -16011.08 |

Summary of Bonding Energy (energy terms are taken from the energy decomposition above)

|                                 |                    |           |          |           |
|---------------------------------|--------------------|-----------|----------|-----------|
| Electrostatic Energy:           | -5.769530285126825 | -156.9969 | -3620.44 | -15147.90 |
| Kinetic Energy:                 | 5.777104402673103  | 157.2030  | 3625.19  | 15167.79  |
| Coulomb (Steric+OrbInt) Energy: | -0.742025446411638 | -20.1915  | -465.63  | -1948.19  |
| XC Energy:                      | -5.363846409157198 | -145.9577 | -3365.86 | -14082.78 |
| Total Bonding Energy:           | -6.098297738022558 | -165.9431 | -3826.74 | -16011.08 |

Correction terms (incorporated in energies above; only for test purposes):

1. Indication of fit-quality: 1st-order fit-correction used in the energy (hartree): 0.0009139915
2. Electrostatic (Fit correction): 0.0000000000

3. Geometry optimizations taking into account solvation (COSMO procedure) by tetrahydrofuran.





Electronic Supplementary Information for Dalton Transactions  
This journal is © The Royal Society of Chemistry 2009

Cl: title: Oxygen (TZP)  
file: t21.Cl  
jobid: ADF 2007.01 RunTime: Jul23-2008 14:55:10  
title: Chlorine (TZP)  
N:  
file: t21.N  
jobid: ADF 2007.01 RunTime: Jul23-2008 14:55:08  
title: Nitrogen (TZP)  
Ru:  
file: t21.Ru  
jobid: ADF 2007.01 RunTime: Jul23-2008 14:55:09  
title: Ruthenium (TZP, 3d frozen)

\*\*\*\*\*  
\* R U N T Y P E : G E O M E T R Y O P T I M I Z A T I O N \*  
\*\*\*\*\*

=====  
Geometry Convergence Tests  
=====

Energy old : -13.28882507  
new : -13.28879786

Convergence tests:  
(Energies in hartree, Gradients in hartree/angstr or radian, Lengths in angstrom, Angles in degrees)

| Item             | Value      | Criterion  | Conv. | Ratio      |
|------------------|------------|------------|-------|------------|
| change in energy | 0.00002721 | 0.00100000 | YES   | 0.52001337 |
| gradient max     | 0.00081031 | 0.00100000 | YES   | 0.50272335 |
| gradient rms     | 0.00018144 | 0.00066667 | YES   | 0.68170168 |
| cart. step max   | 0.00241952 | 0.01000000 | YES   | 0.56846243 |
| cart. step rms   | 0.00058947 | 0.00666667 | YES   | 0.45694838 |

prediction dE : -0.00000496

\*\*\*\*\*  
Geometry CONVERGED  
\*\*\*\*\*

\*\*\*\*\*  
\* Final Geometry \*  
\*\*\*\*\*

Coordinates (Cartesian)  
=====

| Atom  | bohr      |           |           | angstrom  |           |           | Geometric Variables   |     |     |
|-------|-----------|-----------|-----------|-----------|-----------|-----------|-----------------------|-----|-----|
|       | X         | Y         | Z         | X         | Y         | Z         | (0:frozen, *:LT par.) |     |     |
| 1 C   | 6.563477  | -0.510361 | -5.736903 | 3.473243  | -0.270071 | -3.035839 | 1                     | 2   | 3   |
| 2 H   | 2.477071  | -0.097916 | -5.767412 | 1.310809  | -0.051815 | -3.051983 | 4                     | 5   | 6   |
| 3 O   | 0.302786  | 7.637985  | -4.829826 | 0.160228  | 4.041847  | -2.555834 | 7                     | 8   | 9   |
| 4 C   | 4.255705  | 0.386899  | -4.852651 | 2.252022  | 0.204738  | -2.567913 | 10                    | 11  | 12  |
| 5 C   | 8.759157  | 0.162785  | -4.428740 | 4.635147  | 0.086142  | -2.343588 | 13                    | 14  | 15  |
| 6 Cl  | -2.152106 | -0.036710 | -3.692752 | -1.138846 | -0.019426 | -1.954120 | 16                    | 17  | 18  |
| 7 C   | 0.415784  | 5.961056  | -3.411858 | 0.220023  | 3.154455  | -1.805477 | 19                    | 20  | 21  |
| 8 N   | 4.071890  | 1.881310  | -2.801449 | 2.154751  | 0.995546  | -1.482463 | 22                    | 23  | 24  |
| 9 O   | 3.212709  | -5.857577 | -2.553465 | 1.700092  | -3.099696 | -1.351235 | 25                    | 26  | 27  |
| 10 C  | 8.572783  | 1.724348  | -2.320264 | 4.536521  | 0.912486  | -1.227831 | 28                    | 29  | 30  |
| 11 O  | -4.522600 | -7.629512 | -1.868980 | -2.393257 | -4.037364 | -0.989022 | 31                    | 32  | 33  |
| 12 H  | 10.263829 | 2.274716  | -1.290373 | 5.431385  | 1.203728  | -0.682836 | 34                    | 35  | 36  |
| 13 C  | 1.540609  | -4.774778 | -1.627358 | 0.815255  | -2.526704 | -0.861161 | 37                    | 38  | 39  |
| 14 C  | 6.196386  | 2.598383  | -1.526820 | 3.278986  | 1.375005  | -0.807958 | 40                    | 41  | 42  |
| 15 C  | -3.282936 | -5.956585 | -1.161157 | -1.737255 | -3.152089 | -0.614458 | 43                    | 44  | 45  |
| 16 Ru | 0.571226  | 3.228370  | -1.126616 | 0.302280  | 1.708380  | -0.596180 | 46                    | 47  | 48  |
| 17 H  | -6.183874 | 0.150424  | -0.624775 | -3.272365 | 0.079601  | -0.330617 | 49                    | 50  | 51  |
| 18 Ru | -1.268942 | -3.243901 | -0.025919 | -0.671495 | -1.716598 | -0.013716 | 52                    | 53  | 54  |
| 19 C  | 5.761658  | 4.322285  | 0.599501  | 3.048938  | 2.287257  | 0.317242  | 55                    | 56  | 57  |
| 20 C  | -2.190894 | 4.635527  | 0.649647  | -1.159371 | 2.453015  | 0.343778  | 58                    | 59  | 60  |
| 21 C  | 3.226268  | 5.058234  | 1.091920  | 1.707267  | 2.676702  | 0.577819  | 61                    | 62  | 63  |
| 22 C  | -6.271392 | -0.333855 | 1.373441  | -3.318677 | -0.176668 | 0.726794  | 64                    | 65  | 66  |
| 23 O  | 0.973478  | -0.074281 | 1.199546  | 0.515143  | -0.039308 | 0.634772  | 67                    | 68  | 69  |
| 24 H  | 9.696707  | 4.706663  | 1.712896  | 5.131276  | 2.490659  | 0.906426  | 70                    | 71  | 72  |
| 25 H  | -9.710034 | 1.689000  | 2.145477  | -5.138328 | 0.893781  | 1.135337  | 73                    | 74  | 75  |
| 26 C  | 7.754217  | 5.279247  | 2.087220  | 4.103355  | 2.793657  | 1.104509  | 76                    | 77  | 78  |
| 27 O  | -3.806571 | 5.648082  | 1.745151  | -2.014351 | 2.988836  | 0.923494  | 79                    | 80  | 81  |
| 28 N  | -4.369025 | -1.788216 | 2.240680  | -2.311989 | -0.946283 | 1.185717  | 82                    | 83  | 84  |
| 29 H  | 2.668590  | -7.320509 | 2.559453  | 1.412157  | -3.873847 | 1.354404  | 85                    | 86  | 87  |
| 30 C  | -8.211539 | 0.517609  | 2.928476  | -4.345359 | 0.273907  | 1.549683  | 88                    | 89  | 90  |
| 31 C  | 2.785789  | 6.783967  | 3.057110  | 1.474176  | 3.589921  | 1.617753  | 91                    | 92  | 93  |
| 32 H  | 0.873425  | 7.422629  | 3.479073  | 0.462197  | 3.927896  | 1.841046  | 94                    | 95  | 96  |
| 33 C  | -0.586660 | -4.979065 | 3.418066  | -0.310447 | -2.634808 | 1.808763  | 97                    | 98  | 99  |
| 34 C  | 7.269958  | 6.973389  | 4.047157  | 3.847096  | 3.690158  | 2.141663  | 100                   | 101 | 102 |
| 35 C  | 1.374577  | -6.661072 | 4.019791  | 0.727395  | -3.524887 | 2.127182  | 103                   | 104 | 105 |
| 36 C  | 4.778323  | 7.731248  | 4.525288  | 2.528579  | -4.072200 | 2.394679  | 106                   | 107 | 108 |
| 37 H  | 8.821970  | 7.705856  | 5.186618  | 4.668385  | 4.077763  | 2.744640  | 109                   | 110 | 111 |
| 38 C  | -4.320953 | -2.512585 | 4.718492  | -2.281550 | -1.329603 | 2.496918  | 112                   | 113 | 114 |
| 39 C  | -8.165975 | -0.157900 | 5.483453  | -4.321248 | -0.083557 | 2.901718  | 115                   | 116 | 117 |
| 40 H  | 4.377674  | 9.067705  | 6.044030  | 2.316565  | 4.798449  | 3.198363  | 118                   | 119 | 120 |
| 41 C  | -2.232091 | -4.203946 | 5.396265  | -1.181172 | -2.224632 | 2.855581  | 121                   | 122 | 123 |
| 42 C  | -6.214792 | -7.779190 | 6.378494  | -3.288727 | -0.887916 | 3.375354  | 124                   | 125 | 126 |
| 43 C  | 1.728077  | -7.529390 | 6.497102  | 0.914459  | -3.984382 | 3.438118  | 127                   | 128 | 129 |
| 44 H  | 3.274009  | -8.831138 | 6.908068  | 1.732531  | -4.673237 | 3.655592  | 130                   | 131 | 132 |
| 45 H  | -9.645454 | 0.484203  | 6.764168  | -5.104154 | 0.256229  | 3.579444  | 133                   | 134 | 135 |
| 46 C  | -1.860089 | -5.079652 | 7.886430  | -0.984317 | -2.688036 | 4.173319  | 136                   | 137 | 138 |
| 47 H  | -6.166313 | -2.240214 | 8.354366  | -3.263072 | -1.185470 | 4.420940  | 139                   | 140 | 141 |
| 48 C  | 0.112716  | -6.734804 | 9.440343  | 0.059647  | -3.563905 | 4.466437  | 142                   | 143 | 144 |
| 49 H  | -3.114898 | -4.468061 | 9.400651  | -1.648333 | -2.364396 | 4.974610  | 145                   | 146 | 147 |
| 50 H  | 0.388901  | -7.404874 | 10.368578 | 0.205798  | -3.918490 | 5.486815  | 148                   | 149 | 150 |
| 51 H  | 10.600852 | -0.517179 | -5.051103 | 5.609729  | -0.273679 | -2.672928 | 151                   | 152 | 153 |
| 52 H  | 6.621768  | -1.716911 | -7.401858 | 3.504089  | -0.908550 | -3.916894 | 154                   | 155 | 156 |
| 53 H  | 0.609010  | 0.286879  | 2.967991  | 0.322274  | 0.151810  | 1.570593  | 157                   | 158 | 159 |

About initial set of coordinates

Number of spheres = 53  
Number of TOTAL coord. = 53

about final set of coordinates

ncor,nptsaf,npsurf= 260 60 2189

COSMO surface

Area = 1600.711  
Volume = 3743.151  
Number of Points = 2189

Number of elements of the density matrix on this node (used, total): 97079 396495

=====  
Numerical Integration : Voronoi Polyhedra (Te Velde) \*\*\* (parameters, tests) \*\*\*  
=====

General Accuracy Parameter : 5.00

Symmetry used in the points section: NOSYM

Summary of the Symmetry Unique Points:

| -----                          |               |
|--------------------------------|---------------|
| Nr. of used Symmetry Operators | 1             |
| Points in the Atomic Spheres   | 39550         |
| Points in the Atomic Polyhedra | 454287        |
| Points in the Outer Region     | 36028         |
| -----                          |               |
| Total                          | 529865        |
| Sum of Weights                 | 172322.805878 |
| Total nr. of points:           | 529865        |
| Nr. of blocks:                 | 4140          |
| Block length:                  | 128           |
| Nr. of dummy points:           | 55            |

Test of Precision of the Numerical Integration Grid

=====  
Integral of the Total Core Density: 55.99999208038639  
Relative Error: -1.414E-07  
=====

BONDING ENERGY \*\*\* (decomposition) \*\*\*

\*\*\* WARNING \*\*\*

The bond energy is computed as an energy difference between molecule and fragments. In particular when the fragments are single atoms, they are usually computed as SPHERICALLY SYMMETRIC and SPIN-RESTRICTED. Obviously, this usually does NOT represent the true atomic groundstate.

To obtain the 'real' bond energy, (atomic) correction terms must be applied for the true (multiplet) fragment ground state. See ref: E.J.Baerends, V.Branchadell, M.Sodupe, Chem.Phys.Lett.265 (1997) 481

General theoretical background on the bond energy decomposition scheme used here (Morokuma-Ziegler) can be found in the review paper:  
F.M. Bickelhaupt and E.J. Baerends,  
"Kohn-Sham Density Functional Theory: Predicting and Understanding Chemistry"  
In: Rev. Comput. Chem.; Lipkowitz, K. B. and Boyd, D. E., Eds.;  
Wiley-VCH: New York, 2000, Vol. 15, 1-86.

Symbols used in the Bickelhaupt-Baerends (BB) paper are given below to make the direct connection to that paper, where detailed explanations can be found on the meaning of the various terms.

|                                                                 | hartree              | eV         | kcal/mol  | kJ/mol     |
|-----------------------------------------------------------------|----------------------|------------|-----------|------------|
|                                                                 | -----                | -----      | -----     | -----      |
| <b>Pauli Repulsion</b>                                          |                      |            |           |            |
| Kinetic (Delta T^0):                                            | 154.053401221526912  | 4192.0063  | 96669.98  | 404467.15  |
| Delta V^Pauli Coulomb:                                          | -80.039243614995200  | -2177.9786 | -50225.39 | -210143.00 |
| Delta V^Pauli LDA-XC:                                           | -19.079129749497781  | -519.1695  | -11972.34 | -50092.25  |
| Delta V^Pauli GGA-Exchange:                                     | 1.112167940966742    | 30.2636    | 697.90    | 2920.00    |
| Delta V^Pauli GGA-Correlation:                                  | -0.311076391612604   | -8.4648    | -195.20   | -816.73    |
| -----                                                           |                      |            |           |            |
| Total Pauli Repulsion:                                          | 55.736119406388070   | 1516.6570  | 34974.95  | 146335.16  |
| (Total Pauli Repulsion =<br>Delta E^Pauli in BB paper)          |                      |            |           |            |
| <b>Steric Interaction</b>                                       |                      |            |           |            |
| Pauli Repulsion (Delta E^Pauli):                                | 55.736119406388070   | 1516.6570  | 34974.95  | 146335.16  |
| Electrostatic Interaction:                                      | -11.861686721142723  | -322.7729  | -7443.32  | -31142.85  |
| (Electrostatic Interaction =<br>Delta V_elstat in the BB paper) |                      |            |           |            |
| -----                                                           |                      |            |           |            |
| Total Steric Interaction:                                       | 43.874432685245345   | 1193.8841  | 27531.63  | 115192.31  |
| (Total Steric Interaction =<br>Delta E^0 in the BB paper)       |                      |            |           |            |
| <b>Orbital Interactions</b>                                     |                      |            |           |            |
| A:                                                              | -57.126000636582091  | -1554.4776 | -35847.11 | -149984.29 |
| -----                                                           |                      |            |           |            |
| Total Orbital Interactions:                                     | -57.132884285706723  | -1554.6649 | -35851.43 | -150002.37 |
| <b>Alternative Decomposition Orb.Int.</b>                       |                      |            |           |            |
| Kinetic:                                                        | -141.455760105592049 | -3849.2071 | -88764.84 | -371392.05 |
| Coulomb:                                                        | 77.748609320675598   | 2115.6473  | 48787.99  | 204128.94  |
| XC:                                                             | 6.574266499209576    | 178.8949   | 4125.41   | 17260.73   |

Electronic Supplementary Information for Dalton Transactions  
 This journal is © The Royal Society of Chemistry 2009

|                                                       |                     |            |           |            |
|-------------------------------------------------------|---------------------|------------|-----------|------------|
| Total Orbital Interactions:                           | -57.132884285706872 | -1554.6649 | -35851.43 | -150002.37 |
| Residu (E=Steric+OrbInt+Res):                         | 0.000000699438322   | 0.0000     | 0.00      | 0.00       |
| Solvation Energy (el):                                | -0.030349551206372  | -0.8259    | -19.04    | -79.68     |
| Post-SCF Solvation Energies<br>Solvation Energy (cd): | 0.006021711976085   | 0.1639     | 3.78      | 15.81      |
| Total Bonding Energy:                                 | -13.282778740253343 | -361.4428  | -8335.07  | -34873.93  |

Summary of Bonding Energy (energy terms are taken from the energy decomposition above)

|                                 |                     |           |          |           |
|---------------------------------|---------------------|-----------|----------|-----------|
| Electrostatic Energy:           | -11.861686721142723 | -322.7729 | -7443.32 | -31142.85 |
| Kinetic Energy:                 | 12.597641115934863  | 342.7993  | 7905.14  | 33075.10  |
| Coulomb (Steric+OrbInt) Energy: | -2.290633594881285  | -62.3313  | -1437.39 | -6014.06  |
| XC Energy:                      | -11.703771700934066 | -318.4758 | -7344.23 | -30728.25 |
| Solvation:                      | -0.024327839230287  | -0.6620   | -15.27   | -63.87    |
| Total Bonding Energy:           | -13.282778740253498 | -361.4428 | -8335.07 | -34873.93 |

Correction terms (incorporated in energies above; only for test purposes):

1. Indication of fit-quality: 1st-order fit-correction used in the energy (hartree): -0.0030697956
2. Electrostatic (Fit correction): 0.0000000000

b) ax-eq-3c

```
*****
*
* -----
* Amsterdam Density Functional (ADF)      2007.01   August 20, 2007
* -----
*                                     Build 200711141748
*
*
*          =====
*          | A D F |
*          =====
*
* Online information and documentation: http://www.scm.com
* E-mail: support@scm.com   info@scm.com
*
* Scientific publications using ADF results must be properly referenced
* See the User Manuals (or the web site) for recommended citations
* The terms and conditions of the End User License Agreement apply to
* the use of ADF, http://www.scm.com/Sales/LicAgreement.html
*
*****  pentium64_linux *****
```

ADF 2007.01 RunTime: Jul23-2008 14:58:38  
equatorial-parallel-OH

=====  
A T T A C H E D F I L E S  
=====

=====  
M O D E L P A R A M E T E R S  
=====

DENSITY FUNCTIONAL POTENTIAL (scf)  
LDA: VWN  
Gradient Corrections: Becke88 Perdew86 == Not Default ==  
SPIN (restricted / unrestr.)  
Molecule: Restricted  
Fragments: Restricted  
OTHER ASPECTS  
Relativistic Corrections: ---  
Core Treatment: Frozen Orbital(s)  
Electric Field: ---  
Hyperfine or Zeeman Interaction: ---

SOLVATION

-----  
The Solvent-Excluding surface is calculated

Division Level for Surface Triangles (NDIV) 3  
Final Division Level for Triangles (NFDIV) 1  
Radius of the Solvent (RSOL) 3.18000 angstr  
Minimum Radius for new sphere (RMINSOLV) 0.50000 angstr  
Overlapping Factor (OFAC) 0.80000  
New spheres will be assigned to the initials using ASSG1

Dielectric Constant (EPSL) 7.58000  
COSMO equation is solved iteratively- conjugate-gradient  
Maximum of Iterations for Charges (NCIX) 300  
Criterion for Charge convergence (CCNV) 1.0E-06  
Disk size scaled by 0.10000  
Max order of Legendre Polynomial in Disk Potential 4  
Potential expansion cutoff tolerance 0.10000  
Geometry-dependent empirical factor 0.00000  
COSMO charges included variationally in SCF  
COSMO included at every SCF cycle  
C-Matrix calculated in cspmtx  
In cspmtx, C-Matrix calculated using fitted potential

-----  
Fragment File(s)

-----  
C:  
file : t21.C  
jobid: ADF 2007.01 RunTime: Jul23-2008 14:57:11  
title: Carbon (TZP)  
H:  
file : t21.H  
jobid: ADF 2007.01 RunTime: Jul23-2008 14:57:08  
title: Hydrogen (TZP)  
Cl:  
file : t21.Cl  
jobid: ADF 2007.01 RunTime: Jul23-2008 14:57:10  
title: Chlorine (TZP)  
N:

file : t21.N  
 jobId: ADF 2007.01 RunTime: Jul23-2008 14:57:08  
 title: Nitrogen (TZP)  
 O:  
 file : t21.O  
 jobId: ADF 2007.01 RunTime: Jul23-2008 14:57:09  
 title: Oxygen (TZP)  
 Ru:  
 file : t21.Ru  
 jobId: ADF 2007.01 RunTime: Jul23-2008 14:57:08  
 title: Ruthenium (TZP, 3d frozen)

\*\*\*\*\*  
 \* R U N T Y P E : GEOMETRY OPTIMIZATION \*  
 \*\*\*\*\*

=====  
 G E O M E T R Y U P D A T E \*\*\* 17 \*\*\*  
 =====

\*\*\* Using NEW gradient routines \*\*\*

Energy gradients wrt nuclear displacements  
 =====

| Atom  | Cartesian (a.u./angstrom) |           |           |
|-------|---------------------------|-----------|-----------|
|       | X                         | Y         | Z         |
| 1 C   | -0.000117                 | -0.000102 | 0.000033  |
| 2 H   | -0.000154                 | -0.000143 | 0.000022  |
| 3 C   | -0.000072                 | -0.000137 | 0.000036  |
| 4 C   | 0.000001                  | -0.000119 | 0.000024  |
| 5 Cl  | 0.000277                  | -0.000158 | -0.000239 |
| 6 N   | -0.000197                 | -0.000374 | -0.000191 |
| 7 O   | 0.000239                  | 0.000223  | 0.000349  |
| 8 C   | -0.000007                 | 0.000024  | -0.000009 |
| 9 O   | 0.000030                  | -0.000259 | -0.000069 |
| 10 H  | 0.000083                  | -0.000002 | 0.000032  |
| 11 C  | -0.000888                 | -0.000027 | -0.000240 |
| 12 C  | 0.000012                  | -0.000130 | -0.000008 |
| 13 C  | 0.000285                  | 0.000516  | 0.000129  |
| 14 Ru | 0.000202                  | 0.000891  | 0.000107  |
| 15 H  | -0.000063                 | 0.000003  | -0.000011 |
| 16 Ru | 0.000099                  | -0.000624 | 0.000061  |
| 17 C  | 0.000057                  | 0.000029  | 0.000032  |
| 18 C  | 0.000997                  | -0.000709 | -0.000392 |
| 19 C  | 0.000216                  | 0.000065  | -0.000228 |
| 20 C  | -0.000083                 | 0.000092  | -0.000023 |
| 21 H  | 0.000183                  | 0.000109  | -0.000010 |
| 22 H  | -0.000035                 | -0.000003 | 0.000027  |
| 23 C  | 0.000077                  | 0.000013  | -0.000067 |
| 24 O  | -0.000597                 | -0.000158 | -0.000244 |
| 25 N  | -0.000106                 | -0.000101 | 0.000070  |
| 26 H  | 0.000031                  | 0.000050  | 0.000015  |
| 27 C  | -0.000023                 | -0.000026 | 0.000007  |
| 28 C  | 0.000005                  | 0.000068  | 0.000041  |
| 29 H  | 0.000089                  | 0.000061  | -0.000069 |
| 30 C  | -0.000177                 | 0.000090  | 0.000062  |
| 31 C  | 0.000213                  | 0.000133  | -0.000095 |
| 32 C  | -0.000013                 | 0.000038  | -0.000074 |
| 33 C  | 0.000134                  | 0.000133  | -0.000019 |
| 34 H  | 0.000260                  | 0.000167  | -0.000021 |
| 35 C  | -0.000063                 | 0.000087  | 0.000019  |
| 36 C  | -0.000076                 | 0.000045  | 0.000015  |
| 37 H  | 0.000190                  | 0.000137  | -0.000065 |
| 38 C  | 0.000041                  | 0.000080  | 0.000017  |
| 39 C  | 0.000006                  | -0.000072 | 0.000037  |
| 40 C  | 0.000088                  | 0.000016  | 0.000032  |
| 41 H  | 0.000032                  | 0.000095  | 0.000008  |
| 42 H  | -0.000005                 | -0.000033 | -0.000008 |
| 43 C  | -0.000052                 | -0.000033 | 0.000062  |
| 44 H  | -0.000018                 | 0.000005  | 0.000004  |
| 45 C  | 0.000030                  | 0.000080  | 0.000036  |
| 46 H  | 0.000024                  | 0.000050  | 0.000001  |
| 47 H  | 0.000057                  | 0.000081  | 0.000003  |
| 48 H  | -0.000055                 | -0.000109 | 0.000043  |
| 49 H  | -0.000126                 | -0.000185 | 0.000003  |
| 50 O  | -0.000501                 | 0.000116  | 0.000072  |
| 51 H  | -0.000222                 | 0.000080  | 0.000186  |
| 52 C  | -0.000031                 | -0.000282 | 0.000175  |
| 53 O  | -0.000276                 | 0.000210  | 0.000323  |

=====  
 Geometry Convergence Tests  
 =====

Energy old : -13.28516158  
 new : -13.28518595

Convergence tests:  
 (Energies in hartree, Gradients in hartree/angstr or radian, Lengths in angstrom, Angles in degrees)

| Item             | Value       | Criterion  | Conv. | Ratio      |
|------------------|-------------|------------|-------|------------|
| change in energy | -0.00002437 | 0.00050000 | YES   | 0.76342064 |
| gradient max     | 0.00096606  | 0.00100000 | YES   | 0.68513242 |
| gradient rms     | 0.00020439  | 0.00066667 | YES   | 0.81808943 |
| cart. step max   | 0.00713196  | 0.01000000 | YES   | 2.20408168 |
| cart. step rms   | 0.00230590  | 0.00666667 | YES   | 3.08484563 |

prediction dE : -0.00002482

\*\*\*\*\*  
 Geometry CONVERGED  
 \*\*\*\*\*

Electronic Supplementary Information for Dalton Transactions  
This journal is © The Royal Society of Chemistry 2009

\*\*\*\*\*  
\* Final Geometry \*  
\*\*\*\*\*

Coordinates (Cartesian)  
=====

| Atom  | bohr      |           |            | angstrom  |           |           | Geometric Variables<br>(0:frozen, *:LT par.) |     |     |
|-------|-----------|-----------|------------|-----------|-----------|-----------|----------------------------------------------|-----|-----|
|       | X         | Y         | Z          | X         | Y         | Z         |                                              |     |     |
| 1 C   | 6.647777  | -1.702077 | -6.534872  | 3.517852  | -0.900700 | -3.458105 | 1                                            | 2   | 3   |
| 2 H   | 5.537448  | -0.652863 | -2.723094  | 2.930291  | -0.345480 | -1.440999 | 4                                            | 5   | 6   |
| 3 C   | 5.212616  | -0.423688 | -4.742253  | 2.758397  | -0.224206 | -2.509492 | 7                                            | 8   | 9   |
| 4 C   | 6.094488  | -1.325051 | -9.091941  | 3.225064  | -0.701187 | -4.811248 | 10                                           | 11  | 12  |
| 5 Cl  | 2.363147  | 0.449107  | 1.110294   | 1.250524  | 0.237657  | 0.587542  | 13                                           | 14  | 15  |
| 6 N   | 3.324934  | 1.161264  | -5.383725  | 1.759479  | 0.614514  | -2.848944 | 16                                           | 17  | 18  |
| 7 O   | 3.311051  | -6.126451 | -2.625705  | 1.752133  | -3.241978 | -1.389463 | 19                                           | 20  | 21  |
| 8 C   | 4.168047  | 0.336051  | -9.760355  | 2.205635  | 0.177830  | -5.164957 | 22                                           | 23  | 24  |
| 9 O   | -4.563469 | -6.959740 | -1.746890  | -2.414884 | -3.682936 | -0.924415 | 25                                           | 26  | 27  |
| 10 H  | 3.729237  | 0.665337  | -11.740652 | 1.973427  | 0.352081  | -6.212885 | 28                                           | 29  | 30  |
| 11 C  | 1.761967  | -4.822673 | -1.765169  | 0.932393  | -2.552048 | -0.934087 | 31                                           | 32  | 33  |
| 12 C  | 2.797961  | 1.601683  | -7.873443  | 1.480617  | 0.847574  | -4.166446 | 34                                           | 35  | 36  |
| 13 C  | -3.139159 | -5.402854 | -1.123045  | -1.661172 | -2.859067 | -0.594290 | 37                                           | 38  | 39  |
| 14 Ru | 0.907414  | 3.171178  | -2.743265  | 0.480183  | 1.678115  | -1.451673 | 40                                           | 41  | 42  |
| 15 H  | -5.230512 | 0.942453  | -0.686583  | -2.767868 | 0.498725  | -0.363324 | 43                                           | 44  | 45  |
| 16 Ru | -0.804630 | -2.945089 | -0.141865  | -0.425792 | -1.558474 | -0.075072 | 46                                           | 47  | 48  |
| 17 C  | 0.804162  | 3.472421  | -8.327184  | 0.425544  | 1.837526  | -4.406556 | 49                                           | 50  | 51  |
| 18 C  | -1.408570 | 5.117142  | -0.835108  | -0.745383 | 2.707875  | -0.441920 | 52                                           | 53  | 54  |
| 19 C  | -0.324982 | 4.610478  | -6.170546  | -0.171973 | 2.439760  | -3.265312 | 55                                           | 56  | 57  |
| 20 C  | -5.369630 | 0.506622  | 1.321922   | -2.841486 | 0.268093  | 0.699531  | 58                                           | 59  | 60  |
| 21 H  | 0.931927  | 3.319019  | -12.431307 | 0.493154  | 1.756349  | -6.578365 | 61                                           | 62  | 63  |
| 22 H  | -8.570127 | 2.886344  | 2.114563   | -4.535116 | 1.527388  | 1.118978  | 64                                           | 65  | 66  |
| 23 C  | 0.062384  | 4.195811  | -10.783166 | 0.033012  | 2.220327  | -5.706206 | 67                                           | 68  | 69  |
| 24 O  | -2.806513 | 6.431537  | 0.236763   | -1.485143 | 3.403423  | 0.125289  | 70                                           | 71  | 72  |
| 25 N  | -3.632040 | -1.136309 | 2.192069   | -1.921993 | -0.601309 | 1.159993  | 73                                           | 74  | 75  |
| 26 H  | 2.692360  | -7.481023 | 2.427222   | 1.424736  | -3.958787 | 1.284431  | 76                                           | 77  | 78  |
| 27 C  | -7.193118 | 1.568934  | 2.889258   | -3.806434 | 0.830244  | 1.528929  | 79                                           | 80  | 81  |
| 28 C  | -2.159566 | 6.484624  | -6.571675  | -1.142793 | 3.431515  | -3.477581 | 82                                           | 83  | 84  |
| 29 H  | -3.053109 | 7.429598  | -4.974539  | -1.615636 | 3.931574  | -2.632413 | 85                                           | 86  | 87  |
| 30 C  | -0.230085 | -4.748151 | 3.319340   | -0.121756 | -2.512613 | 1.756519  | 88                                           | 89  | 90  |
| 31 C  | -1.771694 | 6.053936  | -11.132581 | -0.937540 | 3.203605  | -5.891108 | 91                                           | 92  | 93  |
| 32 C  | 1.528606  | -6.644366 | 3.906906   | 0.808904  | -3.516047 | 2.067445  | 94                                           | 95  | 96  |
| 33 C  | -2.879287 | 7.201936  | -9.017812  | -1.523653 | 3.811100  | -4.772020 | 97                                           | 98  | 99  |
| 34 H  | -2.324591 | 6.615160  | -13.036233 | -1.230121 | 3.500592  | -6.898477 | 100                                          | 101 | 102 |
| 35 C  | -3.627821 | -1.852406 | 4.668318   | -1.919760 | -0.980251 | 2.470367  | 103                                          | 104 | 105 |
| 36 C  | -7.196532 | 0.899334  | 5.447539   | -3.808241 | 0.475907  | 2.882714  | 106                                          | 107 | 108 |
| 37 H  | -4.304929 | 8.670766  | -9.269297  | -2.278070 | 4.588372  | -4.905101 | 109                                          | 110 | 111 |
| 38 C  | -1.725665 | -3.759713 | 5.323638   | -0.913183 | -1.989555 | 2.817148  | 112                                          | 113 | 114 |
| 39 C  | -5.410165 | -0.814844 | 6.337896   | -2.862936 | -0.431197 | 3.353870  | 115                                          | 116 | 117 |
| 40 C  | 1.851321  | -7.503322 | 6.392433   | 0.979677  | -3.970587 | 3.382730  | 118                                          | 119 | 120 |
| 41 H  | 3.245259  | -8.970288 | 6.790683   | 1.717317  | -4.746872 | 3.593475  | 121                                          | 122 | 123 |
| 42 H  | -8.593167 | 1.695194  | 6.735254   | -4.547308 | 0.897058  | 3.564143  | 124                                          | 125 | 126 |
| 43 C  | -1.387467 | -4.625881 | 7.820323   | -0.734216 | -2.447911 | 4.138337  | 127                                          | 128 | 129 |
| 44 H  | -5.409351 | -1.372147 | 8.315865   | -2.862505 | -0.726109 | 4.400566  | 130                                          | 131 | 132 |
| 45 C  | 0.398832  | -6.486750 | 8.359583   | 0.211053  | -3.432640 | 4.423701  | 133                                          | 134 | 135 |
| 46 H  | -2.517560 | -3.841543 | 9.353219   | -1.332235 | -2.032857 | 4.949510  | 136                                          | 137 | 138 |
| 47 H  | 0.654188  | -7.144444 | 10.295017  | 0.346181  | -3.780677 | 5.447888  | 139                                          | 140 | 141 |
| 48 H  | 7.163522  | -2.308561 | -10.552020 | 3.790772  | -1.221638 | -5.583888 | 142                                          | 143 | 144 |
| 49 H  | 8.149818  | -2.969583 | -5.928150  | 4.312698  | -1.571436 | -3.137042 | 145                                          | 146 | 147 |
| 50 O  | -1.681848 | 0.021088  | -3.030215  | -0.889996 | 0.011160  | -1.603521 | 148                                          | 149 | 150 |
| 51 H  | -1.502242 | -0.667526 | -4.729973  | -0.794952 | -0.353240 | -2.502994 | 151                                          | 152 | 153 |
| 52 C  | 3.292869  | 5.799315  | -2.390895  | 1.742511  | 3.068865  | -1.265207 | 154                                          | 155 | 156 |
| 53 O  | 4.764315  | 7.415905  | -2.158916  | 2.521167  | 3.924328  | -1.142449 | 157                                          | 158 | 159 |

About initial set of coordinates

Number of spheres = 53  
Number of TOTAL coord. = 53

about final set of coordinates

ncor,nptsaf,npsurf= 253 60 2289

COSMO surface

Area = 1598.633  
Volume = 3659.296  
Number of Points = 2289

Number of elements of the density matrix on this node (used, total): 97079 396495

Numerical Integration : Voronoi Polyhedra (Te Velde) \*\*\* (parameters, tests) \*\*\*

General Accuracy Parameter : 5.00

Symmetry used in the points section: NOSYM

Summary of the Symmetry Unique Points:

|                                |               |
|--------------------------------|---------------|
| Nr. of used Symmetry Operators | 1             |
| Points in the Atomic Spheres   | 39354         |
| Points in the Atomic Polyhedra | 438379        |
| Points in the Outer Region     | 36207         |
| Total                          | 513940        |
| Sum of Weights                 | 172949.589972 |
| Total nr. of points:           | 513940        |
| Nr. of blocks:                 | 4016          |
| Block length:                  | 128           |
| Nr. of dummy points:           | 108           |

Test of Precision of the Numerical Integration Grid

```
=====
Integral of the Total Core Density:      55.99999322447157
Relative Error:                          -1.210E-07
```

```
=====
B O N D I N G   E N E R G Y   *** (decomposition) ***
=====
```

\*\*\* WARNING \*\*\*

The bond energy is computed as an energy difference between molecule and fragments. In particular when the fragments are single atoms, they are usually computed as SPHERICALLY SYMMETRIC and SPIN-RESTRICTED. Obviously, this usually does NOT represent the true atomic groundstate.

To obtain the 'real' bond energy, (atomic) correction terms must be applied for the true (multiplet) fragment ground state. See ref: E.J.Baerends, V.Branchadell, M.Sodupe, Chem.Phys.Lett.265 (1997) 481

General theoretical background on the bond energy decomposition scheme used here (Morokuma-Ziegler) can be found in the review paper: F.M. Bickelhaupt and E.J. Baerends, "Kohn-Sham Density Functional Theory: Predicting and Understanding Chemistry" In: Rev. Comput. Chem.; Lipkowitz, K. B. and Boyd, D. B., Eds.; Wiley-VCH: New York, 2000, Vol. 15, 1-86.

Symbols used in the Bickelhaupt-Baerends (BB) paper are given below to make the direct connection to that paper, where detailed explanations can be found on the meaning of the various terms.

|                                                                                               | hartree                    | eV                | kcal/mol         | kJ/mol            |
|-----------------------------------------------------------------------------------------------|----------------------------|-------------------|------------------|-------------------|
| <b>Pauli Repulsion</b>                                                                        |                            |                   |                  |                   |
| Kinetic (Delta T <sup>0</sup> ):                                                              | 154.089284374563420        | 4192.9828         | 96692.50         | 404561.36         |
| Delta V <sup>0</sup> Pauli Coulomb:                                                           | -80.071921640863096        | -2178.8678        | -50245.89        | -210228.80        |
| Delta V <sup>0</sup> Pauli LDA-XC:                                                            | -19.086262960286252        | -519.3636         | -11976.81        | -50110.98         |
| Delta V <sup>0</sup> Pauli GGA-Exchange:                                                      | 1.113407381969616          | 30.2974           | 698.67           | 2923.25           |
| Delta V <sup>0</sup> Pauli GGA-Correlation:                                                   | -0.311652367355379         | -8.4805           | -195.56          | -818.24           |
| <b>Total Pauli Repulsion:</b>                                                                 | <b>55.732854788028312</b>  | <b>1516.5681</b>  | <b>34972.90</b>  | <b>146326.59</b>  |
| (Total Pauli Repulsion =<br>Delta E <sup>0</sup> Pauli in BB paper)                           |                            |                   |                  |                   |
| <b>Steric Interaction</b>                                                                     |                            |                   |                  |                   |
| Pauli Repulsion (Delta E <sup>0</sup> Pauli):                                                 | 55.732854788028312         | 1516.5681         | 34972.90         | 146326.59         |
| Electrostatic Interaction:                                                                    | -11.866284430473929        | -322.8980         | -7446.21         | -31154.93         |
| (Electrostatic Interaction =<br>Delta V <sub>elstat</sub> in the BB paper)                    |                            |                   |                  |                   |
| <b>Total Steric Interaction:</b>                                                              | <b>43.866570357554380</b>  | <b>1193.6701</b>  | <b>27526.69</b>  | <b>115171.66</b>  |
| (Total Steric Interaction =<br>Delta E <sup>0</sup> in the BB paper)                          |                            |                   |                  |                   |
| <b>Orbital Interactions</b>                                                                   |                            |                   |                  |                   |
| A:                                                                                            | -57.112917156174930        | -1554.1216        | -35838.90        | -149949.94        |
| <b>Total Orbital Interactions:</b>                                                            | <b>-57.119519785880428</b> | <b>-1554.3012</b> | <b>-35843.04</b> | <b>-149967.28</b> |
| <b>Alternative Decomposition Orb.Int.</b>                                                     |                            |                   |                  |                   |
| Kinetic:                                                                                      | -141.484582367181673       | -3849.9914        | -88782.93        | -371467.72        |
| Coulomb:                                                                                      | 77.787327294447323         | 2116.7009         | 48812.29         | 204230.60         |
| XC:                                                                                           | 6.577735286853827          | 178.9893          | 4127.59          | 17269.84          |
| <b>Total Orbital Interactions:</b>                                                            | <b>-57.119519785880520</b> | <b>-1554.3012</b> | <b>-35843.04</b> | <b>-149967.28</b> |
| <b>Residu (E=Steric+OrbInt+Res):</b>                                                          | <b>-0.000000069578914</b>  | <b>0.0000</b>     | <b>0.00</b>      | <b>0.00</b>       |
| <b>Solvation Energy (el):</b>                                                                 | <b>-0.032211807386534</b>  | <b>-0.8765</b>    | <b>-20.21</b>    | <b>-84.57</b>     |
| <b>Post-SCF Solvation Energies</b>                                                            |                            |                   |                  |                   |
| Solvation Energy (cd):                                                                        | 0.006016267306523          | 0.1637            | 3.78             | 15.80             |
| <b>Total Bonding Energy:</b>                                                                  | <b>-13.279145037984975</b> | <b>-361.3439</b>  | <b>-8332.79</b>  | <b>-34864.39</b>  |
| <b>Summary of Bonding Energy (energy terms are taken from the energy decomposition above)</b> |                            |                   |                  |                   |
| Electrostatic Energy:                                                                         | -11.866284430473929        | -322.8980         | -7446.21         | -31154.93         |
| Kinetic Energy:                                                                               | 12.604702007381746         | 342.9914          | 7909.57          | 33093.64          |
| Coulomb (Steric+OrbInt) Energy:                                                               | -2.284594415994690         | -62.1670          | -1433.60         | -5998.20          |
| XC Energy:                                                                                    | -11.706772658818185        | -318.5575         | -7346.11         | -30736.13         |
| Solvation:                                                                                    | -0.026195540080011         | -0.7128           | -16.44           | -68.78            |
| <b>Total Bonding Energy:</b>                                                                  | <b>-13.279145037985067</b> | <b>-361.3439</b>  | <b>-8332.79</b>  | <b>-34864.39</b>  |

Correction terms (incorporated in energies above; only for test purposes):

1. Indication of fit-quality: 1st-order fit-correction used in the energy (hartree): -0.0026188294
2. Electrostatic (Fit correction): 0.0000000000





Electronic Supplementary Information for Dalton Transactions  
This journal is © The Royal Society of Chemistry 2009

N: file : t21.N  
jobid: ADF 2007.01 RunTime: Jul24-2008 16:56:01  
title: Nitrogen (TZP)

Ru: file : t21.Ru  
jobid: ADF 2007.01 RunTime: Jul24-2008 16:56:03  
title: Ruthenium (TZP, 3d frozen)

Cl: file : t21.Cl  
jobid: ADF 2007.01 RunTime: Jul24-2008 16:56:02  
title: Chlorine (TZP)

\*\*\*\*\*  
\* R U N T Y P E : GEOMETRY OPTIMIZATION \*  
\*\*\*\*\*

=====  
Geometry Convergence Tests  
=====

Energy old : -13.28076053  
new : -13.28078884

Convergence tests:  
(Energies in hartree, Gradients in hartree/angstr or radian, Lengths in angstrom, Angles in degrees)

| Item             | Value       | Criterion  | Conv. | Ratio      |
|------------------|-------------|------------|-------|------------|
| change in energy | -0.00002831 | 0.00100000 | YES   | 0.83160108 |
| gradient max     | 0.00099916  | 0.00100000 | YES   | 0.91414683 |
| gradient rms     | 0.00022198  | 0.00066667 | YES   | 1.01483267 |
| cart. step max   | 0.00635838  | 0.01000000 | YES   | 0.92664433 |
| cart. step rms   | 0.00189156  | 0.00666667 | YES   | 0.93195578 |

prediction dE : -0.00001481

\*\*\*\*\*  
Geometry CONVERGED  
\*\*\*\*\*

\*\*\*\*\*  
\* Final Geometry \*  
\*\*\*\*\*

Coordinates (Cartesian)  
=====

| Atom  | bohr      |            |           | angstrom  |           |           | Geometric Variables   |     |     |
|-------|-----------|------------|-----------|-----------|-----------|-----------|-----------------------|-----|-----|
|       | X         | Y          | Z         | X         | Y         | Z         | (0:frozen, *:LT par.) |     |     |
| 1 C   | 6.371104  | -0.650122  | -5.704918 | 3.371443  | -0.344030 | -3.018913 | 1                     | 2   | 3   |
| 2 H   | 2.270503  | -0.509433  | -5.247926 | 1.201498  | -0.269580 | -2.777083 | 4                     | 5   | 6   |
| 3 O   | -0.221455 | 7.143608   | -5.133864 | -0.117189 | 3.780234  | -2.716724 | 7                     | 8   | 9   |
| 4 C   | 4.113875  | 0.194542   | -4.654339 | 2.176969  | 0.102947  | -2.462970 | 10                    | 11  | 12  |
| 5 C   | 8.639641  | 0.335402   | -4.769401 | 4.571901  | 0.177487  | -2.523858 | 13                    | 14  | 15  |
| 6 O   | -1.282012 | -0.084956  | -2.679073 | -0.678412 | -0.044957 | -1.417704 | 16                    | 17  | 18  |
| 7 C   | 0.123198  | 5.649545   | -3.555459 | 0.065194  | 2.989611  | -1.881468 | 19                    | 20  | 21  |
| 8 N   | 4.058261  | 1.927123   | -2.792790 | 2.147539  | 1.019790  | -1.477881 | 22                    | 23  | 24  |
| 9 O   | 3.408463  | -5.908784  | -2.176831 | 1.803681  | -3.126794 | -1.151929 | 25                    | 26  | 27  |
| 10 C  | 8.574768  | 2.137118   | -2.853143 | 4.537572  | 1.130914  | -1.509818 | 28                    | 29  | 30  |
| 11 O  | -4.443482 | -7.150391  | -2.578203 | -2.351389 | -3.783824 | -1.364326 | 31                    | 32  | 33  |
| 12 H  | 10.323543 | 2.928469   | -2.119253 | 5.462984  | 1.549679  | -1.121461 | 34                    | 35  | 36  |
| 13 C  | 1.693505  | -4.815396  | -1.344848 | 0.896164  | -2.548198 | -0.711663 | 37                    | 38  | 39  |
| 14 C  | 6.243078  | 2.946391   | -1.879405 | 3.303695  | 1.559163  | -0.994538 | 40                    | 41  | 42  |
| 15 C  | -3.207132 | -5.654244  | -1.541552 | -1.697141 | -2.992097 | -0.815754 | 43                    | 44  | 45  |
| 16 Ru | 0.643288  | 3.268130   | -0.999393 | 0.340413  | 1.729420  | -0.528856 | 46                    | 47  | 48  |
| 17 H  | -5.876514 | 0.464549   | -0.530797 | -3.109717 | 0.245829  | -0.280885 | 49                    | 50  | 51  |
| 18 Ru | -1.184830 | -3.278798  | 0.118359  | -0.626985 | -1.735065 | 0.062633  | 52                    | 53  | 54  |
| 19 C  | 5.896311  | 4.887472   | 0.069935  | 3.120194  | 2.586339  | 0.037008  | 55                    | 56  | 57  |
| 20 C  | -2.046912 | 4.739921   | 0.836606  | -1.083179 | 2.508258  | 0.442713  | 58                    | 59  | 60  |
| 21 C  | 3.370452  | 5.556192   | 0.703989  | 1.783566  | 2.940210  | 0.372535  | 61                    | 62  | 63  |
| 22 C  | -6.129283 | -0.206190  | 1.396252  | -3.243477 | -0.109111 | 0.738865  | 64                    | 65  | 66  |
| 23 Cl | 1.449345  | -0.005098  | 2.393617  | 0.766961  | -0.002698 | 1.266648  | 67                    | 68  | 69  |
| 24 H  | 9.885938  | 5.525696   | 0.812889  | 5.231413  | 2.924072  | 0.430162  | 70                    | 71  | 72  |
| 25 H  | -9.459361 | 2.011848   | 2.106953  | -5.005678 | 1.064624  | 1.114951  | 73                    | 74  | 75  |
| 26 C  | 7.954994  | 6.072928   | 1.275577  | 4.209602  | 3.213655  | 0.675006  | 76                    | 77  | 78  |
| 27 O  | -3.608602 | 5.803787   | 1.962839  | -1.909590 | 3.071232  | 1.038690  | 79                    | 80  | 81  |
| 28 N  | -4.414981 | -1.887002  | 2.239359  | -2.336307 | -0.998558 | 1.185018  | 82                    | 83  | 84  |
| 29 H  | 2.074565  | -8.064783  | 2.502672  | 1.097812  | -4.267699 | 1.324357  | 85                    | 86  | 87  |
| 30 C  | -8.120323 | 0.654301   | 2.877622  | -4.297090 | 0.346241  | 1.522772  | 88                    | 89  | 90  |
| 31 C  | 3.011788  | 7.478815   | 2.495777  | 1.593770  | 3.957619  | 1.320708  | 91                    | 92  | 93  |
| 32 H  | -1.109694 | 8.076732   | 3.014698  | 0.587220  | 4.274022  | 1.595310  | 94                    | 95  | 96  |
| 33 C  | -1.007917 | -5.501273  | 3.363125  | -0.533367 | -2.911148 | 1.779689  | 97                    | 98  | 99  |
| 34 C  | 7.546537  | -7.948414  | 3.081509  | 3.993456  | 4.206120  | 1.630664  | 100                   | 101 | 102 |
| 35 C  | 0.730808  | -7.424400  | 3.926715  | 0.386727  | -3.928823 | 2.077928  | 103                   | 104 | 105 |
| 36 C  | 5.066614  | 8.661073   | 3.678702  | 2.681137  | 4.583243  | 1.946685  | 106                   | 107 | 108 |
| 37 H  | 9.146407  | 8.849929   | 4.014993  | 4.840070  | 4.683181  | 2.124643  | 109                   | 110 | 111 |
| 38 C  | -4.622612 | -2.849611  | 4.625782  | -2.446181 | -1.507949 | 2.447858  | 112                   | 113 | 114 |
| 39 C  | -8.326638 | -0.260489  | 5.349516  | -4.406267 | -0.137845 | 2.830842  | 115                   | 116 | 117 |
| 40 H  | -4.725290 | 10.137074  | 5.078102  | 2.500516  | 5.364309  | 2.687246  | 118                   | 119 | 120 |
| 41 C  | -2.743722 | -4.777669  | 5.281116  | -1.451915 | -2.528234 | 2.794646  | 121                   | 122 | 123 |
| 42 C  | -6.575264 | -2.017535  | 6.211998  | -3.479480 | -1.067634 | 3.291473  | 124                   | 125 | 126 |
| 43 C  | 0.806699  | -8.553447  | 6.321854  | 0.426887  | -4.526289 | 3.453381  | 127                   | 128 | 129 |
| 44 H  | 2.192105  | -10.031558 | 6.707994  | 1.160012  | -5.308472 | 3.549718  | 130                   | 131 | 132 |
| 45 H  | -9.848624 | 0.380481   | 6.579849  | -5.211667 | 0.201342  | 4.481906  | 133                   | 134 | 135 |
| 46 C  | -2.649984 | -5.909722  | 7.691724  | -1.402311 | -3.127290 | 4.070285  | 136                   | 137 | 138 |
| 47 H  | -6.725526 | -2.765340  | 8.127856  | -3.558995 | -1.463355 | 4.301076  | 139                   | 140 | 141 |
| 48 C  | -0.876055 | -7.785612  | 8.217731  | -0.463588 | -4.119968 | 4.348636  | 142                   | 143 | 144 |
| 49 H  | -3.959356 | -5.323023  | 9.169122  | -2.095201 | -2.816822 | 4.852090  | 145                   | 146 | 147 |
| 50 H  | -0.807284 | -8.647122  | 10.087651 | -0.427197 | -4.575860 | 5.338155  | 148                   | 149 | 150 |
| 51 H  | 10.446292 | -0.291770  | -5.533984 | 5.527940  | -0.154398 | -2.928458 | 151                   | 152 | 153 |
| 52 H  | 6.341767  | -2.053809  | -7.208626 | 3.355919  | -1.086829 | -3.814640 | 154                   | 155 | 156 |
| 53 H  | -3.006759 | 0.311727   | -3.176735 | -1.591109 | 0.164959  | -1.681056 | 157                   | 158 | 159 |

About initial set of coordinates

```
-----
Number of spheres           =      53
Number of TOTAL coord.     =      53

about final set of coordinates
-----
ncor,nptsaf,npsurf=      243      60      2187
-----
```

```
-----
COSMO surface
Area           =      1604.053
Volume         =      3652.291
Number of Points =      2187
-----
```

Number of elements of the density matrix on this node (used, total): 97079 396495

```
=====
Numerical Integration : Voronoi Polyhedra (Te Velde) *** (parameters, tests) ***
=====
```

General Accuracy Parameter : 5.00

Symmetry used in the points section: NOSYM

Summary of the Symmetry Unique Points:

```
-----
Nr. of used Symmetry Operators           1

Points in the Atomic Spheres             39354
Points in the Atomic Polyhedra          449697
Points in the Outer Region               33895
-----
Total                                    522946

Sum of Weights                           171674.991338

Total nr. of points:      522946
Nr. of blocks:           4086
Block length:            128
Nr. of dummy points:     62
-----
```

Test of Precision of the Numerical Integration Grid

```
-----
Integral of the Total Core Density:      55.99999462599539
Relative Error:                          -9.596E-08
-----
```

```
=====
B O N D I N G   E N E R G Y *** (decomposition) ***
=====
```

\*\*\* WARNING \*\*\*

The bond energy is computed as an energy difference between molecule and fragments. In particular when the fragments are single atoms, they are usually computed as SPHERICALLY SYMMETRIC and SPIN-RESTRICTED. Obviously, this usually does NOT represent the true atomic groundstate.

To obtain the 'real' bond energy, (atomic) correction terms must be applied for the true (multiplet) fragment ground state. See ref: E.J.Baerends, V.Branchadell, M.Sodupe, Chem.Phys.Lett.265 (1997) 481

General theoretical background on the bond energy decomposition scheme used here (Morokuma-Ziegler) can be found in the review paper: F.M. Bickelhaupt and E.J. Baerends, "Kohn-Sham Density Functional Theory: Predicting and Understanding Chemistry" In: Rev. Comput. Chem.; Lipkowitz, K. B. and Boyd, D. E., Eds.; Wiley-VCH: New York, 2000, Vol. 15, 1-86.

Symbols used in the Bickelhaupt-Baerends (BB) paper are given below to make the direct connection to that paper, where detailed explanations can be found on the meaning of the various terms.

|                                                                            | hartree              | eV         | kcal/mol  | kJ/mol     |
|----------------------------------------------------------------------------|----------------------|------------|-----------|------------|
| <b>Pauli Repulsion</b>                                                     |                      |            |           |            |
| Kinetic (Delta T <sup>0</sup> ):                                           | 154.170323450376799  | 4195.1880  | 96743.35  | 404774.13  |
| Delta V <sup>0</sup> Pauli Coulomb:                                        | -80.117549475107040  | -2180.1094 | -50274.53 | -210348.60 |
| Delta V <sup>0</sup> Pauli LDA-XC:                                         | -19.089247172079013  | -519.4448  | -11978.68 | -50118.81  |
| Delta V <sup>0</sup> Pauli GGA-Exchange:                                   | 1.112161860450094    | 30.2635    | 697.89    | 2919.98    |
| Delta V <sup>0</sup> Pauli GGA-Correlation:                                | -0.311151896881990   | -8.4669    | -195.25   | -816.93    |
| Total Pauli Repulsion:                                                     | 55.764536766758852   | 1517.4303  | 34992.78  | 146409.77  |
| (Total Pauli Repulsion =<br>Delta E <sup>0</sup> Pauli in BB paper)        |                      |            |           |            |
| <b>Steric Interaction</b>                                                  |                      |            |           |            |
| Pauli Repulsion (Delta E <sup>0</sup> Pauli):                              | 55.764536766758852   | 1517.4303  | 34992.78  | 146409.77  |
| Electrostatic Interaction:                                                 | -11.871052327636569  | -323.0278  | -7449.20  | -31167.44  |
| (Electrostatic Interaction =<br>Delta V <sub>elstat</sub> in the BB paper) |                      |            |           |            |
| Total Steric Interaction:                                                  | 43.893484439122282   | 1194.4025  | 27543.58  | 115242.33  |
| (Total Steric Interaction =<br>Delta E <sup>0</sup> in the BB paper)       |                      |            |           |            |
| <b>Orbital Interactions</b>                                                |                      |            |           |            |
| A:                                                                         | -57.131382660048118  | -1554.6240 | -35850.49 | -149998.42 |
| Total Orbital Interactions:                                                | -57.137724883654926  | -1554.7966 | -35854.47 | -150015.08 |
| <b>Alternative Decomposition Orb.Int.</b>                                  |                      |            |           |            |
| Kinetic:                                                                   | -141.576909207918106 | -3852.5037 | -88840.86 | -371710.12 |
| Coulomb:                                                                   | 77.855448954229203   | 2118.5546  | 48855.04  | 204409.45  |
| XC:                                                                        | 6.583735370034140    | 179.1526   | 4131.36   | 17285.59   |
| Total Orbital Interactions:                                                | -57.137724883654762  | -1554.7966 | -35854.47 | -150015.08 |

Electronic Supplementary Information for Dalton Transactions  
This journal is © The Royal Society of Chemistry 2009

|                               |                     |           |          |           |
|-------------------------------|---------------------|-----------|----------|-----------|
| Residu (E=Steric+OrbInt+Res): | -0.000007109234254  | -0.0002   | 0.00     | -0.02     |
| Solvation Energy (el):        | -0.036522957779945  | -0.9938   | -22.92   | -95.89    |
| Post-SCF Solvation Energies   |                     |           |          |           |
| Solvation Energy (cd):        | 0.006030467681630   | 0.1641    | 3.78     | 15.83     |
| Total Bonding Energy:         | -13.274740043865211 | -361.2241 | -8330.03 | -34852.83 |

Summary of Bonding Energy (energy terms are taken from the energy decomposition above)

|                                 |                     |           |          |           |
|---------------------------------|---------------------|-----------|----------|-----------|
| Electrostatic Energy:           | -11.871052327636569 | -323.0278 | -7449.20 | -31167.44 |
| Kinetic Energy:                 | 12.593414242458692  | 342.6842  | 7902.49  | 33064.00  |
| Coulomb (Steric+OrbInt) Energy: | -2.262107630112084  | -61.5551  | -1419.49 | -5939.16  |
| XC Energy:                      | -11.704501838476768 | -318.4957 | -7344.69 | -30730.17 |
| Solvation:                      | -0.030492490098315  | -0.8297   | -19.13   | -80.06    |
| Total Bonding Energy:           | -13.274740043865043 | -361.2241 | -8330.03 | -34852.83 |

Correction terms (incorporated in energies above; only for test purposes):

1. Indication of fit-quality: 1st-order fit-correction used in the energy (hartree): -0.0045485245
2. Electrostatic (Fit correction): 0.0000000000

4. Single Point calculations on fragments from gas-phase optimized geometries.



|    |    |         |         |         |       |       |          |
|----|----|---------|---------|---------|-------|-------|----------|
| 4  | C  | 0.8173  | -2.5296 | -0.8635 | 6.00  | 6.00  | 12.0000  |
| 5  | C  | -1.7312 | -3.1526 | -0.6282 | 6.00  | 6.00  | 12.0000  |
| 6  | H  | -3.2410 | 0.0956  | -0.3388 | 1.00  | 1.00  | 1.0078   |
| 7  | Ru | -0.6659 | -1.7151 | -0.0176 | 44.00 | 16.00 | 101.9043 |
| 8  | C  | -3.3045 | -0.1658 | 0.7179  | 6.00  | 6.00  | 12.0000  |
| 9  | O  | 0.5240  | -0.0465 | 0.6220  | 8.00  | 8.00  | 15.9949  |
| 10 | H  | -5.1166 | 0.9210  | 1.1211  | 1.00  | 1.00  | 1.0078   |
| 11 | N  | -2.3075 | -0.9439 | 1.1793  | 7.00  | 7.00  | 14.0031  |
| 12 | H  | 1.4131  | -3.8662 | 1.3556  | 1.00  | 1.00  | 1.0078   |
| 13 | C  | -4.3328 | 0.2891  | 1.5360  | 6.00  | 6.00  | 12.0000  |
| 14 | C  | -0.3121 | -2.6334 | 1.8045  | 6.00  | 6.00  | 12.0000  |
| 15 | C  | 0.7254  | -3.5213 | 2.1278  | 6.00  | 6.00  | 12.0000  |
| 16 | C  | -2.2871 | -1.3321 | 2.4886  | 6.00  | 6.00  | 12.0000  |
| 17 | C  | -4.3195 | -0.0773 | 2.8856  | 6.00  | 6.00  | 12.0000  |
| 18 | C  | -1.1853 | -2.2260 | 2.8502  | 6.00  | 6.00  | 12.0000  |
| 19 | C  | -3.2957 | -0.8886 | 3.3612  | 6.00  | 6.00  | 12.0000  |
| 20 | C  | 0.9089  | -3.9800 | 3.4367  | 6.00  | 6.00  | 12.0000  |
| 21 | H  | 1.7280  | -4.6674 | 3.6569  | 1.00  | 1.00  | 1.0078   |
| 22 | H  | -5.1056 | 0.2643  | 3.5606  | 1.00  | 1.00  | 1.0078   |
| 23 | C  | -0.9903 | -2.6891 | 4.1676  | 6.00  | 6.00  | 12.0000  |
| 24 | H  | -3.2763 | -1.1916 | 4.4060  | 1.00  | 1.00  | 1.0078   |
| 25 | C  | 0.0523  | -3.5619 | 4.4633  | 6.00  | 6.00  | 12.0000  |
| 26 | H  | -1.6558 | -2.3656 | 4.9689  | 1.00  | 1.00  | 1.0078   |
| 27 | H  | 0.1984  | -3.9161 | 5.4842  | 1.00  | 1.00  | 1.0078   |
| 28 | H  | 0.4365  | 0.1152  | 1.5787  | 1.00  | 1.00  | 1.0078   |

```

<Jul22-2008> <18:47:23> ADF 2007.01 RunTime: Jul22-2008 18:47:23
<Jul22-2008> <18:47:23> axOHeqCl fragment
<Jul22-2008> <18:47:23> RunType : SINGLE POINT
<Jul22-2008> <18:47:25> Net Charge: -1 (Nuclei minus Electrons)
<Jul22-2008> <18:47:25> Symmetry : NOSYM
<Jul22-2008> <18:47:25> >>>> FRAGM
<Jul22-2008> <18:47:25> >>>> CORORT
<Jul22-2008> <18:47:26> >>>> FITINT
<Jul22-2008> <18:47:36> >>>> CLSMAT
<Jul22-2008> <18:47:37> >>>> ORTHON
<Jul22-2008> <18:47:39> >>>> GENPT
<Jul22-2008> <18:47:39> Acc.Num.Int.= 4.500
<Jul22-2008> <18:47:46> Block Length= 128
<Jul22-2008> <18:47:58> >>>> PTBAS
<Jul22-2008> <18:48:21> >>>> CYCLE
<Jul22-2008> <18:48:38> 1
<Jul22-2008> <18:49:08> 2 ErrMat 2.30229077 MaxEl -0.33127458
<Jul22-2008> <18:49:35> 3 ErrMat 1.04664709 MaxEl 0.14215918
<Jul22-2008> <18:50:01> 4 ErrMat 5.02727116 MaxEl -1.23038236
<Jul22-2008> <18:50:27> 5 ErrMat 1.13234306 MaxEl -0.23070991
<Jul22-2008> <18:50:52> 6 ErrMat 0.38338698 MaxEl -0.06823474
<Jul22-2008> <18:51:18> 7 ErrMat 0.25578820 MaxEl -0.05183249
<Jul22-2008> <18:51:43> 8 ErrMat 0.10662979 MaxEl -0.02243907
<Jul22-2008> <18:52:09> 9 ErrMat 0.04678236 MaxEl -0.00741751
<Jul22-2008> <18:52:35> 10 ErrMat 0.01999900 MaxEl -0.00489166
<Jul22-2008> <18:53:00> 11 ErrMat 0.01222889 MaxEl 0.00189698
<Jul22-2008> <18:53:26> 12 ErrMat 0.00338658 MaxEl -0.00052244
<Jul22-2008> <18:53:52> 13 ErrMat 0.00147318 MaxEl 0.00027377
<Jul22-2008> <18:54:21> 14 ErrMat 0.00037205 MaxEl 0.00005820
<Jul22-2008> <18:54:49> 15 ErrMat 0.00013932 MaxEl -0.00002377
<Jul22-2008> <18:55:16> 16 ErrMat 0.00008881 MaxEl 0.00001287
<Jul22-2008> <18:55:41> 17 ErrMat 0.00003620 MaxEl -0.00000499
<Jul22-2008> <18:56:06> 18 ErrMat 0.00000795 MaxEl -0.00000126
<Jul22-2008> <18:56:32> 19 ErrMat 0.00000722 MaxEl 0.00000093
<Jul22-2008> <18:56:33> SCF converged
<Jul22-2008> <18:56:57> 20 ErrMat 0.00000264 MaxEl -0.00000061
<Jul22-2008> <18:57:00> >>>> COREPS
<Jul22-2008> <18:57:14> >>>> TOTEN
<Jul22-2008> <19:00:40> >>>> POPAN
<Jul22-2008> <19:00:40> >>>> DEBYE
<Jul22-2008> <19:00:41> >>>> AMETS
<Jul22-2008> <19:00:46> Bond Energy LDA -7.54819466 a.u.
<Jul22-2008> <19:00:46> Bond Energy LDA -205.39682736 eV
<Jul22-2008> <19:00:46> + GGA-X -6.47185612 a.u.
<Jul22-2008> <19:00:46> + GGA-X -176.10816539 eV
<Jul22-2008> <19:00:46> + GGA-XC -6.92541455 a.u.
<Jul22-2008> <19:00:46> + GGA-XC -188.45011820 eV
<Jul22-2008> <19:00:46> >>>> POPUL
<Jul22-2008> <19:00:48> NORMAL TERMINATION
<Jul22-2008> <19:00:48> END
    
```

(2) 5

```
*****
*
* -----
* Amsterdam Density Functional (ADF)      2007.01   August 20, 2007
* -----
*                                     Build 200708202008
*
*
*          =====
*          | A D F |
*          =====
*
* Online information and documentation: http://www.scm.com
* E-mail: support@scm.com   info@scm.com
*
* Scientific publications using ADF results must be properly referenced
* See the User Manuals (or the web site) for recommended citations
* The terms and conditions of the End User License Agreement apply to
* the use of ADF, http://www.scm.com/Sales/LicAgreement.html
*
***** macintel *****
```

ADF 2007.01 RunTime: Jul22-2008 18:37:05  
RuCO2 fragment

=====  
A T T A C H E D F I L E S  
=====

=====  
M O D E L P A R A M E T E R S  
=====

DENSITY FUNCTIONAL POTENTIAL (scf)  
LDA: VWN  
Gradient Corrections: Becke88 Perdew86 == Not Default ==  
SPIN (restricted / unrestr.)  
Molecule: Restricted  
Fragments: Restricted  
OTHER ASPECTS  
Relativistic Corrections: ---  
Core Treatment: Frozen Orbital(s)  
Electric Field: ---  
Hyperfine or Zeeman Interaction: ---

Fragment File(s)

```
-----
C:
  file : t21.C
  jobid: ADF 2007.01 RunTime: Jul22-2008 18:37:03
  title: Carbon (TZP)
H:
  file : t21.H
  jobid: ADF 2007.01 RunTime: Jul22-2008 18:36:57
  title: Hydrogen (TZP)
O:
  file : t21.O
  jobid: ADF 2007.01 RunTime: Jul22-2008 18:37:02
  title: Oxygen (TZP)
N:
  file : t21.N
  jobid: ADF 2007.01 RunTime: Jul22-2008 18:37:01
  title: Nitrogen (TZP)
Ru:
  file : t21.Ru
  jobid: ADF 2007.01 RunTime: Jul22-2008 18:37:01
  title: Ruthenium (TZP, 3d frozen)
```

```
*****
* R U N   T Y P E : S I N G L E P O I N T *
*****
```

=====  
G E O M E T R Y \*\*\* 3D Molecule \*\*\*  
=====

ATOMS

```
=====  
          X Y Z          CHARGE          At.Mass  
          (Angstrom)          Nucl   +Core  
-----  
1 C      3.4568  -0.2973  -3.0174      6.00   6.00   12.0000  
2 H      1.2904  -0.0789  -3.0173      1.00   1.00   1.0078  
3 O      0.1426  4.0417  -2.5449      8.00   8.00  15.9949  
4 C      2.2390  0.1853  -2.5491      6.00   6.00   12.0000  
5 C      4.6216  0.0702  -2.3367      6.00   6.00   12.0000  
6 C      0.2076  3.1530  -1.7993      6.00   6.00   12.0000  
7 N      2.1485  0.9911  -1.4760      7.00   7.00  14.0031  
8 C      4.5287  0.9092  -1.2321      6.00   6.00   12.0000  
9 H      5.4258  1.2071  -0.6933      1.00   1.00   1.0078  
10 C     3.2733  1.3769  -0.8073      6.00   6.00   12.0000  
11 Ru    0.2964  1.7053  -0.5862     44.00  16.00  101.9043  
12 C     3.0484  2.2939  0.3119      6.00   6.00   12.0000
```

|    |   |         |         |         |      |      |         |
|----|---|---------|---------|---------|------|------|---------|
| 13 | C | -1.1559 | 2.4523  | 0.3600  | 6.00 | 6.00 | 12.0000 |
| 14 | C | 1.7069  | 2.6795  | 0.5766  | 6.00 | 6.00 | 12.0000 |
| 15 | H | 5.1327  | 2.5037  | 0.8914  | 1.00 | 1.00 | 1.0078  |
| 16 | C | 4.1043  | 2.8066  | 1.0913  | 6.00 | 6.00 | 12.0000 |
| 17 | O | -2.0047 | 2.9927  | 0.9456  | 8.00 | 8.00 | 15.9949 |
| 18 | C | 1.4795  | 3.5984  | 1.6122  | 6.00 | 6.00 | 12.0000 |
| 19 | H | 0.4670  | 3.9343  | 1.8370  | 1.00 | 1.00 | 1.0078  |
| 20 | C | 3.8527  | 3.7077  | 2.1226  | 6.00 | 6.00 | 12.0000 |
| 21 | C | 2.5352  | 4.1066  | 2.3785  | 6.00 | 6.00 | 12.0000 |
| 22 | H | 4.6757  | 4.1011  | 2.7201  | 1.00 | 1.00 | 1.0078  |
| 23 | H | 2.3264  | 4.8194  | 3.1788  | 1.00 | 1.00 | 1.0078  |
| 24 | H | 5.5952  | -0.2953 | -2.6664 | 1.00 | 1.00 | 1.0078  |
| 25 | H | 3.4825  | -0.9537 | -3.8860 | 1.00 | 1.00 | 1.0078  |

```

<Jul22-2008> <18:37:05> ADF 2007.01 RunTime: Jul22-2008 18:37:05
<Jul22-2008> <18:37:05> RuCO2 fragment
<Jul22-2008> <18:37:12> RunType : SINGLE POINT
<Jul22-2008> <18:37:13> Net Charge: 1 (Nuclei minus Electrons)
<Jul22-2008> <18:37:13> Symmetry : NOSYM
<Jul22-2008> <18:37:13> >>>> FRAGM
<Jul22-2008> <18:37:14> >>>> CORORT
<Jul22-2008> <18:37:14> >>>> FITINT
<Jul22-2008> <18:37:22> >>>> CLSMAT
<Jul22-2008> <18:37:22> >>>> ORTHON
<Jul22-2008> <18:37:24> >>>> GENPT
<Jul22-2008> <18:37:24> Acc.Num.Int.= 4.500
<Jul22-2008> <18:37:30> Block Length= 128
<Jul22-2008> <18:37:41> >>>> PTBAS
<Jul22-2008> <18:37:57> >>>> CYCLE
<Jul22-2008> <18:38:09> 1
<Jul22-2008> <18:38:30> 2 ErrMat 2.41109572 MaxEl -0.31458679
<Jul22-2008> <18:38:48> 3 ErrMat 1.15567328 MaxEl 0.23086051
<Jul22-2008> <18:39:07> 4 ErrMat 1.59209668 MaxEl 0.23106680
<Jul22-2008> <18:39:26> 5 ErrMat 0.51020846 MaxEl -0.07682797
<Jul22-2008> <18:39:44> 6 ErrMat 0.25036135 MaxEl 0.04446496
<Jul22-2008> <18:40:03> 7 ErrMat 0.13290771 MaxEl -0.01950336
<Jul22-2008> <18:40:22> 8 ErrMat 0.04732809 MaxEl -0.01003323
<Jul22-2008> <18:40:40> 9 ErrMat 0.01696897 MaxEl 0.00346477
<Jul22-2008> <18:40:59> 10 ErrMat 0.00808345 MaxEl -0.00229756
<Jul22-2008> <18:41:17> 11 ErrMat 0.00322267 MaxEl -0.00044221
<Jul22-2008> <18:41:36> 12 ErrMat 0.00116742 MaxEl -0.00014848
<Jul22-2008> <18:41:55> 13 ErrMat 0.00062640 MaxEl 0.00013985
<Jul22-2008> <18:42:14> 14 ErrMat 0.00027690 MaxEl 0.00004580
<Jul22-2008> <18:42:33> 15 ErrMat 0.00009569 MaxEl 0.00002755
<Jul22-2008> <18:42:51> 16 ErrMat 0.00011690 MaxEl 0.00001921
<Jul22-2008> <18:43:10> 17 ErrMat 0.00003467 MaxEl 0.00000892
<Jul22-2008> <18:43:29> 18 ErrMat 0.00002110 MaxEl -0.00000281
<Jul22-2008> <18:43:47> 19 ErrMat 0.00001070 MaxEl 0.00000183
<Jul22-2008> <18:44:06> 20 ErrMat 0.00000197 MaxEl -0.00000033
<Jul22-2008> <18:44:07> SCF converged
<Jul22-2008> <18:44:25> 21 ErrMat 0.00000129 MaxEl 0.00000016
<Jul22-2008> <18:44:27> >>>> COREPS
<Jul22-2008> <18:44:37> >>>> TOTEN
<Jul22-2008> <18:46:51> >>>> POPAN
<Jul22-2008> <18:46:52> >>>> DEBYE
<Jul22-2008> <18:46:53> >>>> AMETS
<Jul22-2008> <18:46:59> Bond Energy LDA -6.65773791 a.u.
<Jul22-2008> <18:46:59> Bond Energy LDA -181.16626622 eV
<Jul22-2008> <18:46:59> + GGA-X -5.66454795 a.u.
<Jul22-2008> <18:46:59> + GGA-X -154.14019246 eV
<Jul22-2008> <18:46:59> + GGA-XC -6.09319314 a.u.
<Jul22-2008> <18:46:59> + GGA-XC -165.80422149 eV
<Jul22-2008> <18:46:59> >>>> POPUL
<Jul22-2008> <18:47:00> NORMAL TERMINATION
<Jul22-2008> <18:47:00> END
    
```







=====
   
M O D E L P A R A M E T E R S
   
=====

DENSITY FUNCTIONAL POTENTIAL (scf)

LDA: VWN  
 Gradient Corrections: Becke88 Perdew86 == Not Default ==

SPIN (restricted / unrestr.)

Molecule: Restricted  
 Fragments: Restricted

OTHER ASPECTS

Relativistic Corrections: ---  
 Core Treatment: Frozen Orbital(s)  
 Electric Field: ---  
 Hyperfine or Zeeman Interaction: ---

Fragment File(s)

O:  
 file : t21.O  
 jobId: ADF 2007.01 RunTime: Jul22-2008 19:07:48  
 title: Oxygen (TZP)  
 C:  
 file : t21.C  
 jobId: ADF 2007.01 RunTime: Jul22-2008 19:07:47  
 title: Carbon (TZP)  
 H:  
 file : t21.H  
 jobId: ADF 2007.01 RunTime: Jul22-2008 19:07:22  
 title: Hydrogen (TZP)  
 Ru:  
 file : t21.Ru  
 jobId: ADF 2007.01 RunTime: Jul22-2008 19:07:46  
 title: Ruthenium (TZP, 3d frozen)  
 N:  
 file : t21.N  
 jobId: ADF 2007.01 RunTime: Jul22-2008 19:07:44  
 title: Nitrogen (TZP)

\*\*\*\*\*  
 \* R U N T Y P E : S I N G L E P O I N T \*  
 \*\*\*\*\*

=====
   
G E O M E T R Y \*\*\* 3D Molecule \*\*\*
   
=====

ATOMS

| ===== |    | X Y Z      |         |         | CHARGE |       | At.Mass  |
|-------|----|------------|---------|---------|--------|-------|----------|
|       |    | (Angstrom) |         |         | Nucl   | +Core |          |
| 1     | O  | 1.7632     | -3.2392 | -1.3691 | 8.00   | 8.00  | 15.9949  |
| 2     | O  | -2.4074    | -3.7045 | -0.9197 | 8.00   | 8.00  | 15.9949  |
| 3     | C  | 0.9338     | -2.5512 | -0.9279 | 6.00   | 6.00  | 12.0000  |
| 4     | C  | -1.6630    | -2.8731 | -0.5895 | 6.00   | 6.00  | 12.0000  |
| 5     | H  | -2.7611    | 0.4960  | -0.3602 | 1.00   | 1.00  | 1.0078   |
| 6     | Ru | -0.4265    | -1.5553 | -0.0811 | 44.00  | 16.00 | 101.9043 |
| 7     | C  | -2.8398    | 0.2658  | 0.7036  | 6.00   | 6.00  | 12.0000  |
| 8     | H  | -4.5302    | 1.5293  | 1.1270  | 1.00   | 1.00  | 1.0078   |
| 9     | N  | -1.9213    | -0.6021 | 1.1612  | 7.00   | 7.00  | 14.0031  |
| 10    | H  | 1.4540     | -3.9251 | 1.2814  | 1.00   | 1.00  | 1.0078   |
| 11    | C  | -3.8039    | 0.8278  | 1.5340  | 6.00   | 6.00  | 12.0000  |
| 12    | C  | -0.1075    | -2.4992 | 1.7550  | 6.00   | 6.00  | 12.0000  |
| 13    | C  | 0.8345     | -3.4898 | 2.0651  | 6.00   | 6.00  | 12.0000  |
| 14    | C  | -1.9102    | -0.9815 | 2.4716  | 6.00   | 6.00  | 12.0000  |
| 15    | C  | -3.8023    | 0.4707  | 2.8872  | 6.00   | 6.00  | 12.0000  |
| 16    | C  | -0.8990    | -1.9814 | 2.8147  | 6.00   | 6.00  | 12.0000  |
| 17    | C  | -2.8560    | -0.4329 | 3.3547  | 6.00   | 6.00  | 12.0000  |
| 18    | C  | 1.0134     | -3.9379 | 3.3798  | 6.00   | 6.00  | 12.0000  |
| 19    | H  | 1.7623     | -4.7043 | 3.5900  | 1.00   | 1.00  | 1.0078   |
| 20    | H  | -4.5413    | 0.8915  | 3.5709  | 1.00   | 1.00  | 1.0078   |
| 21    | C  | -0.7109    | -2.4352 | 4.1366  | 6.00   | 6.00  | 12.0000  |
| 22    | H  | -2.8514    | -0.7300 | 4.4019  | 1.00   | 1.00  | 1.0078   |
| 23    | C  | 0.2436     | -3.4077 | 4.4211  | 6.00   | 6.00  | 12.0000  |
| 24    | H  | -1.3087    | -2.0226 | 4.9497  | 1.00   | 1.00  | 1.0078   |
| 25    | H  | 0.3872     | -3.7509 | 5.4465  | 1.00   | 1.00  | 1.0078   |

<Jul22-2008> <19:07:53> ADF 2007.01 RunTime: Jul22-2008 19:07:53  
 <Jul22-2008> <19:07:53> RuCO2 fragment  
 <Jul22-2008> <19:08:00> RunType : SINGLE POINT  
 <Jul22-2008> <19:08:14> Net Charge: 1 (Nuclei minus Electrons)  
 <Jul22-2008> <19:08:14> Symmetry : NOSYM  
 <Jul22-2008> <19:08:14> >>> FRAGM  
 <Jul22-2008> <19:08:16> >>> CORORT  
 <Jul22-2008> <19:08:17> >>> FITINT  
 <Jul22-2008> <19:08:26> >>> CLSMAT  
 <Jul22-2008> <19:08:26> >>> ORTHON  
 <Jul22-2008> <19:08:29> >>> GENPT  
 <Jul22-2008> <19:08:29> Acc.Num.Int.= 4.500  
 <Jul22-2008> <19:08:38> Block Length= 128  
 <Jul22-2008> <19:08:46> >>> PTBAS  
 <Jul22-2008> <19:09:04> >>> CYCLE  
 <Jul22-2008> <19:09:40> 1  
 <Jul22-2008> <19:11:00> 2 ErrMat 2.40403183 MaxEl 0.39168173  
 <Jul22-2008> <19:12:32> 3 ErrMat 1.15392900 MaxEl 0.21985946  
 <Jul22-2008> <19:13:09> 4 ErrMat 1.56583664 MaxEl -0.21863657  
 <Jul22-2008> <19:13:43> 5 ErrMat 0.50359425 MaxEl 0.11191293  
 <Jul22-2008> <19:14:37> 6 ErrMat 0.24687274 MaxEl -0.04493380  
 <Jul22-2008> <19:16:19> 7 ErrMat 0.13030907 MaxEl 0.02018983  
 <Jul22-2008> <19:17:37> 8 ErrMat 0.004627115 MaxEl 0.00886581  
 <Jul22-2008> <19:19:09> 9 ErrMat 0.01667901 MaxEl -0.00302066

```
<Jul22-2008> <19:20:34> 10 ErrMat 0.00787523 MaxE1 0.00198011
<Jul22-2008> <19:21:12> 11 ErrMat 0.00314049 MaxE1 -0.00042730
<Jul22-2008> <19:21:48> 12 ErrMat 0.00157941 MaxE1 -0.00039118
<Jul22-2008> <19:22:16> 13 ErrMat 0.00069939 MaxE1 0.00014855
<Jul22-2008> <19:23:28> 14 ErrMat 0.00027989 MaxE1 0.00006512
<Jul22-2008> <19:25:28> 15 ErrMat 0.00026770 MaxE1 0.00005462
<Jul22-2008> <19:26:53> 16 ErrMat 0.00021558 MaxE1 0.00004643
<Jul22-2008> <19:29:02> 17 ErrMat 0.00012853 MaxE1 0.00004143
<Jul22-2008> <19:30:20> 18 ErrMat 0.00009164 MaxE1 0.00002593
<Jul22-2008> <19:30:57> 19 ErrMat 0.00007781 MaxE1 0.00002136
<Jul22-2008> <19:31:29> 20 ErrMat 0.00004763 MaxE1 0.00001420
<Jul22-2008> <19:32:30> 21 ErrMat 0.00003148 MaxE1 0.00000938
<Jul22-2008> <19:34:24> 22 ErrMat 0.00001610 MaxE1 -0.00000620
<Jul22-2008> <19:36:13> 23 ErrMat 0.00000549 MaxE1 -0.00000141
<Jul22-2008> <19:37:56> 24 ErrMat 0.00000377 MaxE1 -0.00000094
<Jul22-2008> <19:38:43> SCF converged
<Jul22-2008> <19:39:33> 25 ErrMat 0.00000138 MaxE1 0.00000018
<Jul22-2008> <19:39:36> >>>> COREPS
<Jul22-2008> <19:39:57> >>>> TOTEN
<Jul22-2008> <19:43:37> >>>> POPAN
<Jul22-2008> <19:43:44> >>>> DEBYE
<Jul22-2008> <19:43:49> >>>> AMETS
<Jul22-2008> <19:44:34> Bond Energy LDA -6.65747672 a.u.
<Jul22-2008> <19:44:34> Bond Energy LDA -181.15915902 eV
<Jul22-2008> <19:44:34> + GGA-X -5.66324940 a.u.
<Jul22-2008> <19:44:34> + GGA-X -154.10485696 eV
<Jul22-2008> <19:44:34> + GGA-XC -6.09237756 a.u.
<Jul22-2008> <19:44:34> + GGA-XC -165.78202835 eV
<Jul22-2008> <19:44:34> >>>> POPUL
<Jul22-2008> <19:44:39> NORMAL TERMINATION
<Jul22-2008> <19:44:42> END
```

(3) eq-4

```
*****
*
* -----
* Amsterdam Density Functional (ADF) 2007.01 August 20, 2007
* -----
* Build 200708202008
*
*
* =====
* | A D F |
* =====
*
* Online information and documentation: http://www.scm.com
* E-mail: support@scm.com info@scm.com
*
* Scientific publications using ADF results must be properly referenced
* See the User Manuals (or the web site) for recommended citations
* The terms and conditions of the End User License Agreement apply to
* the use of ADF, http://www.scm.com/Sales/LicAgreement.html
*
* ***** macintel *****
```

ADF 2007.01 RunTime: Jul28-2008 15:18:39  
ruoheqclax fragment

=====  
A T T A C H E D F I L E S  
=====

=====  
M O D E L P A R A M E T E R S  
=====

DENSITY FUNCTIONAL POTENTIAL (scf)  
LDA: VWN  
Gradient Corrections: Becke88 Perdew86 == Not Default ==  
SPIN (restricted / unrestr.)  
Molecule: Restricted  
Fragments: Restricted  
OTHER ASPECTS  
Relativistic Corrections: ---  
Core Treatment: Frozen Orbital(s)  
Electric Field: ---  
Hyperfine or Zeeman Interaction: ---

Fragment File(s)

```
-----
Cl:
file : t21.Cl
jobid: ADF 2007.01 RunTime: Jul28-2008 15:18:35
title: Chlorine (TZP)
O:
file : t21.O
jobid: ADF 2007.01 RunTime: Jul28-2008 15:18:35
title: Oxygen (TZP)
C:
file : t21.C
jobid: ADF 2007.01 RunTime: Jul28-2008 15:18:34
title: Carbon (TZP)
H:
file : t21.H
jobid: ADF 2007.01 RunTime: Jul28-2008 15:18:31
title: Hydrogen (TZP)
Ru:
file : t21.Ru
jobid: ADF 2007.01 RunTime: Jul28-2008 15:18:33
```





```
<Jul28-2008> <15:08:33> ADF 2007.01 RunTime: Jul28-2008 15:08:33
<Jul28-2008> <15:08:33> ruco2 fragment
<Jul28-2008> <15:08:34> RunType : SINGLE POINT
<Jul28-2008> <15:08:35> Net Charge: 1 (Nuclei minus Electrons)
<Jul28-2008> <15:08:35> Symmetry : NOSYM
<Jul28-2008> <15:08:35> >>>> FRAGM
<Jul28-2008> <15:08:36> >>>> CORORT
<Jul28-2008> <15:08:36> >>>> FITINT
<Jul28-2008> <15:08:45> >>>> CLSMAT
<Jul28-2008> <15:08:45> >>>> ORTHON
<Jul28-2008> <15:08:48> >>>> GENPT
<Jul28-2008> <15:08:48> Acc.Num.Int.= 4.500
<Jul28-2008> <15:08:53> Block Length= 128
<Jul28-2008> <15:09:01> >>>> PTBAS
<Jul28-2008> <15:09:17> >>>> CYCLE
<Jul28-2008> <15:09:29> 1
<Jul28-2008> <15:09:57> 2 ErrMat 2.41038547 MaxEl 0.34145804
<Jul28-2008> <15:10:16> 3 ErrMat 1.15529720 MaxEl 0.22895615
<Jul28-2008> <15:10:34> 4 ErrMat 1.59351108 MaxEl 0.22427847
<Jul28-2008> <15:10:53> 5 ErrMat 0.51108759 MaxEl -0.09015932
<Jul28-2008> <15:11:11> 6 ErrMat 0.25064503 MaxEl -0.04657639
<Jul28-2008> <15:11:30> 7 ErrMat 0.13501592 MaxEl 0.02129422
<Jul28-2008> <15:11:48> 8 ErrMat 0.04767447 MaxEl -0.00974103
<Jul28-2008> <15:12:07> 9 ErrMat 0.01700089 MaxEl 0.00337477
<Jul28-2008> <15:12:25> 10 ErrMat 0.00819228 MaxEl -0.00228357
<Jul28-2008> <15:12:44> 11 ErrMat 0.00328548 MaxEl 0.00047365
<Jul28-2008> <15:13:02> 12 ErrMat 0.00112232 MaxEl 0.00017590
<Jul28-2008> <15:13:21> 13 ErrMat 0.00060710 MaxEl 0.00014188
<Jul28-2008> <15:13:39> 14 ErrMat 0.00026269 MaxEl 0.00004172
<Jul28-2008> <15:13:58> 15 ErrMat 0.00008135 MaxEl 0.00001158
<Jul28-2008> <15:14:16> 16 ErrMat 0.00008373 MaxEl 0.00001826
<Jul28-2008> <15:14:35> 17 ErrMat 0.00001235 MaxEl -0.00000279
<Jul28-2008> <15:14:53> 18 ErrMat 0.00000764 MaxEl 0.00000128
<Jul28-2008> <15:15:12> 19 ErrMat 0.00000431 MaxEl 0.00000079
<Jul28-2008> <15:15:13> SCF converged
<Jul28-2008> <15:15:31> 20 ErrMat 0.00000243 MaxEl 0.00000040
<Jul28-2008> <15:15:33> >>>> COREPS
<Jul28-2008> <15:15:43> >>>> TOTEN
<Jul28-2008> <15:17:56> >>>> POPAN
<Jul28-2008> <15:17:57> >>>> DEBYE
<Jul28-2008> <15:17:57> >>>> AMETS
<Jul28-2008> <15:18:01> Bond Energy LDA -6.65711912 a.u.
<Jul28-2008> <15:18:01> Bond Energy LDA -181.14942818 eV
<Jul28-2008> <15:18:01> + GGA-X -5.66432674 a.u.
<Jul28-2008> <15:18:01> + GGA-X -154.13417299 eV
<Jul28-2008> <15:18:01> + GGA-XC -6.09278470 a.u.
<Jul28-2008> <15:18:01> + GGA-XC -165.79310738 eV
<Jul28-2008> <15:18:01> >>>> POPUL
<Jul28-2008> <15:18:02> NORMAL TERMINATION
<Jul28-2008> <15:18:03> END
```





|    |    |         |         |         |       |       |          |
|----|----|---------|---------|---------|-------|-------|----------|
| 2  | O  | 1.8100  | -3.1295 | -1.1317 | 8.00  | 8.00  | 15.9949  |
| 3  | O  | -2.3556 | -3.7770 | -1.3764 | 8.00  | 8.00  | 15.9949  |
| 4  | C  | 0.9003  | -2.5482 | -0.6998 | 6.00  | 6.00  | 12.0000  |
| 5  | C  | -1.7015 | -2.9927 | -0.8190 | 6.00  | 6.00  | 12.0000  |
| 6  | H  | -3.0768 | 0.2817  | -0.2570 | 1.00  | 1.00  | 1.0078   |
| 7  | Ru | -0.6242 | -1.7318 | 0.0623  | 44.00 | 16.00 | 101.9043 |
| 8  | C  | -3.2291 | -0.0898 | 0.7553  | 6.00  | 6.00  | 12.0000  |
| 9  | Cl | 0.7543  | -0.0052 | 1.2396  | 17.00 | 17.00 | 34.9689  |
| 10 | H  | -4.9855 | 1.0933  | 1.1366  | 1.00  | 1.00  | 1.0078   |
| 11 | N  | -2.3293 | -0.9888 | 1.1921  | 7.00  | 7.00  | 14.0031  |
| 12 | H  | 1.1100  | -4.2470 | 1.3279  | 1.00  | 1.00  | 1.0078   |
| 13 | C  | -4.2853 | 0.3618  | 1.5366  | 6.00  | 6.00  | 12.0000  |
| 14 | C  | -0.5279 | -2.9013 | 1.7809  | 6.00  | 6.00  | 12.0000  |
| 15 | C  | 0.3934  | -3.9163 | 2.0797  | 6.00  | 6.00  | 12.0000  |
| 16 | C  | -2.4409 | -1.5088 | 2.4503  | 6.00  | 6.00  | 12.0000  |
| 17 | C  | -4.4023 | -0.1385 | 2.8382  | 6.00  | 6.00  | 12.0000  |
| 18 | C  | -1.4502 | -2.5270 | 2.7945  | 6.00  | 6.00  | 12.0000  |
| 19 | C  | -3.4799 | -1.0721 | 3.2922  | 6.00  | 6.00  | 12.0000  |
| 20 | C  | 0.4300  | -4.5178 | 3.3423  | 6.00  | 6.00  | 12.0000  |
| 21 | H  | 1.1659  | -5.2981 | 3.5465  | 1.00  | 1.00  | 1.0078   |
| 22 | H  | -5.2103 | 0.1965  | 3.4899  | 1.00  | 1.00  | 1.0078   |
| 23 | C  | -1.4030 | -3.1319 | 4.0671  | 6.00  | 6.00  | 12.0000  |
| 24 | H  | -3.5612 | -1.4778 | 4.2982  | 1.00  | 1.00  | 1.0078   |
| 25 | C  | -0.4644 | -4.1209 | 4.3447  | 6.00  | 6.00  | 12.0000  |
| 26 | H  | -2.0985 | -2.8256 | 4.8494  | 1.00  | 1.00  | 1.0078   |
| 27 | H  | -0.4282 | -4.5813 | 5.3326  | 1.00  | 1.00  | 1.0078   |
| 28 | H  | -1.5520 | 0.1286  | -1.7913 | 1.00  | 1.00  | 1.0078   |

<Jul28-2008> <12:27:31> ADF 2007.01 RunTime: Jul28-2008 12:27:31  
 <Jul28-2008> <12:27:31> eqohaxcl fragment  
 <Jul28-2008> <12:27:34> RunType : SINGLE POINT  
 <Jul28-2008> <12:27:37> Net Charge: -1 (Nuclei minus Electrons)  
 <Jul28-2008> <12:27:37> Symmetry : NOSYM  
 <Jul28-2008> <12:27:37> >>>> FRAGM  
 <Jul28-2008> <12:27:40> >>>> CORORT  
 <Jul28-2008> <12:27:41> >>>> FITINT  
 <Jul28-2008> <12:27:51> >>>> CLSMAT  
 <Jul28-2008> <12:27:51> >>>> ORTHON  
 <Jul28-2008> <12:27:54> >>>> GENPT  
 <Jul28-2008> <12:27:54> Acc.Num.Int.= 4.500  
 <Jul28-2008> <12:28:01> Block Length= 128  
 <Jul28-2008> <12:28:11> >>>> PTBAS  
 <Jul28-2008> <12:28:35> >>>> CYCLE  
 <Jul28-2008> <12:28:53> 1  
 <Jul28-2008> <12:29:26> 2 ErrMat 2.31229919 MaxE1 -0.31097613  
 <Jul28-2008> <12:29:51> 3 ErrMat 1.06227361 MaxE1 -0.14464013  
 <Jul28-2008> <12:30:17> 4 ErrMat 4.86155027 MaxE1 1.23177560  
 <Jul28-2008> <12:30:42> 5 ErrMat 1.22207690 MaxE1 -0.26238412  
 <Jul28-2008> <12:31:07> 6 ErrMat 0.29717815 MaxE1 0.05109957  
 <Jul28-2008> <12:31:33> 7 ErrMat 0.31340377 MaxE1 -0.04973100  
 <Jul28-2008> <12:31:58> 8 ErrMat 0.14404034 MaxE1 0.02768747  
 <Jul28-2008> <12:32:23> 9 ErrMat 0.04939118 MaxE1 -0.00683842  
 <Jul28-2008> <12:32:49> 10 ErrMat 0.01956687 MaxE1 0.00373522  
 <Jul28-2008> <12:33:14> 11 ErrMat 0.00945570 MaxE1 -0.00138230  
 <Jul28-2008> <12:33:39> 12 ErrMat 0.00347485 MaxE1 -0.00043366  
 <Jul28-2008> <12:34:05> 13 ErrMat 0.00096242 MaxE1 0.00013165  
 <Jul28-2008> <12:34:30> 14 ErrMat 0.00066131 MaxE1 0.00012096  
 <Jul28-2008> <12:34:56> 15 ErrMat 0.00019758 MaxE1 0.00005123  
 <Jul28-2008> <12:35:21> 16 ErrMat 0.00010005 MaxE1 0.00001534  
 <Jul28-2008> <12:35:46> 17 ErrMat 0.00027252 MaxE1 -0.00011233  
 <Jul28-2008> <12:36:12> 18 ErrMat 0.00006392 MaxE1 0.00002662  
 <Jul28-2008> <12:36:37> 19 ErrMat 0.00006161 MaxE1 0.00002008  
 <Jul28-2008> <12:37:02> 20 ErrMat 0.00003373 MaxE1 0.00001516  
 <Jul28-2008> <12:37:27> 21 ErrMat 0.00002754 MaxE1 0.00001277  
 <Jul28-2008> <12:37:53> 22 ErrMat 0.00001964 MaxE1 0.00000882  
 <Jul28-2008> <12:38:18> 23 ErrMat 0.00001103 MaxE1 0.00000499  
 <Jul28-2008> <12:38:43> 24 ErrMat 0.00000663 MaxE1 0.00000310  
 <Jul28-2008> <12:39:09> 25 ErrMat 0.00000062 MaxE1 0.00000007  
 <Jul28-2008> <12:39:10> SCF converged  
 <Jul28-2008> <12:39:35> 26 ErrMat 0.00000064 MaxE1 -0.00000027  
 <Jul28-2008> <12:39:37> >>>> COREPS  
 <Jul28-2008> <12:39:50> >>>> TOTEN  
 <Jul28-2008> <12:43:15> >>>> POPAN  
 <Jul28-2008> <12:43:15> >>>> DEBYE  
 <Jul28-2008> <12:43:16> >>>> AMETS  
 <Jul28-2008> <12:43:24> Bond Energy LDA -7.53527499 a.u.  
 <Jul28-2008> <12:43:24> Bond Energy LDA -205.04526537 eV  
 <Jul28-2008> <12:43:24> + GGA-X -6.46032098 a.u.  
 <Jul28-2008> <12:43:24> + GGA-X -175.79427839 eV  
 <Jul28-2008> <12:43:24> + GGA-XC -6.91321234 a.u.  
 <Jul28-2008> <12:43:24> + GGA-XC -188.11807937 eV  
 <Jul28-2008> <12:43:24> >>>> POPUL  
 <Jul28-2008> <12:43:26> NORMAL TERMINATION  
 <Jul28-2008> <12:43:26> END



|    |    |         |         |         |       |       |          |
|----|----|---------|---------|---------|-------|-------|----------|
| 10 | C  | 3.2997  | 1.5601  | -0.9899 | 6.00  | 6.00  | 12.0000  |
| 11 | Ru | 0.3363  | 1.7252  | -0.5309 | 44.00 | 16.00 | 101.9043 |
| 12 | C  | 3.1152  | 2.5847  | 0.0386  | 6.00  | 6.00  | 12.0000  |
| 13 | C  | -1.0781 | 2.5043  | 0.4491  | 6.00  | 6.00  | 12.0000  |
| 14 | C  | 1.7783  | 2.9318  | 0.3762  | 6.00  | 6.00  | 12.0000  |
| 15 | H  | 5.2256  | 2.9302  | 0.4292  | 1.00  | 1.00  | 1.0078   |
| 16 | C  | 4.2022  | 3.2161  | 0.6753  | 6.00  | 6.00  | 12.0000  |
| 17 | O  | -1.9008 | 3.0700  | 1.0485  | 8.00  | 8.00  | 15.9949  |
| 18 | C  | 1.5875  | 3.9450  | 1.3269  | 6.00  | 6.00  | 12.0000  |
| 19 | H  | 0.5798  | 4.2539  | 1.6058  | 1.00  | 1.00  | 1.0078   |
| 20 | C  | 3.9850  | 4.2041  | 1.6316  | 6.00  | 6.00  | 12.0000  |
| 21 | C  | 2.6720  | 4.5727  | 1.9504  | 6.00  | 6.00  | 12.0000  |
| 22 | H  | 4.8299  | 4.6844  | 2.1262  | 1.00  | 1.00  | 1.0078   |
| 23 | H  | 2.4896  | 5.3508  | 2.6941  | 1.00  | 1.00  | 1.0078   |
| 24 | H  | 5.5266  | -0.1538 | -2.9240 | 1.00  | 1.00  | 1.0078   |
| 25 | H  | 3.3558  | -1.1031 | -3.7973 | 1.00  | 1.00  | 1.0078   |

```

<Jul28-2008> <12:43:42> ADF 2007.01 RunTime: Jul28-2008 12:43:42
<Jul28-2008> <12:43:42> ruco2 fragment
<Jul28-2008> <12:43:43> RunType : SINGLE POINT
<Jul28-2008> <12:43:44> Net Charge: 1 (Nuclei minus Electrons)
<Jul28-2008> <12:43:44> Symmetry : NOSYM
<Jul28-2008> <12:43:44> >>>> FRAGM
<Jul28-2008> <12:43:44> >>>> CORORT
<Jul28-2008> <12:43:44> >>>> FITINT
<Jul28-2008> <12:43:53> >>>> CLSMAT
<Jul28-2008> <12:43:53> >>>> ORTHON
<Jul28-2008> <12:43:54> >>>> GENPT
<Jul28-2008> <12:43:54> Acc.Num.Int.= 4.500
<Jul28-2008> <12:44:00> Block Length= 128
<Jul28-2008> <12:44:03> >>>> PTBAS
<Jul28-2008> <12:44:19> >>>> CYCLE
<Jul28-2008> <12:44:31> 1
<Jul28-2008> <12:44:51> 2 ErrMat 2.40253306 MaxEl -0.29635206
<Jul28-2008> <12:45:09> 3 ErrMat 1.15187624 MaxEl 0.21703495
<Jul28-2008> <12:45:28> 4 ErrMat 1.56740109 MaxEl 0.22765890
<Jul28-2008> <12:45:47> 5 ErrMat 0.50547455 MaxEl -0.07671555
<Jul28-2008> <12:46:05> 6 ErrMat 0.24748402 MaxEl 0.04488541
<Jul28-2008> <12:46:24> 7 ErrMat 0.13022714 MaxEl -0.01958316
<Jul28-2008> <12:46:43> 8 ErrMat 0.04641909 MaxEl -0.00972992
<Jul28-2008> <12:47:01> 9 ErrMat 0.01658930 MaxEl 0.00332487
<Jul28-2008> <12:47:20> 10 ErrMat 0.00788041 MaxEl -0.00218971
<Jul28-2008> <12:47:39> 11 ErrMat 0.00309376 MaxEl -0.00041944
<Jul28-2008> <12:47:58> 12 ErrMat 0.00109157 MaxEl -0.00013052
<Jul28-2008> <12:48:17> 13 ErrMat 0.00058364 MaxEl 0.00012653
<Jul28-2008> <12:48:35> 14 ErrMat 0.00027887 MaxEl -0.00005498
<Jul28-2008> <12:48:54> 15 ErrMat 0.00009576 MaxEl 0.00002252
<Jul28-2008> <12:49:13> 16 ErrMat 0.00009130 MaxEl 0.00001576
<Jul28-2008> <12:49:32> 17 ErrMat 0.00002529 MaxEl 0.00000550
<Jul28-2008> <12:49:51> 18 ErrMat 0.00001089 MaxEl 0.00000142
<Jul28-2008> <12:50:09> 19 ErrMat 0.00000362 MaxEl -0.00000054
<Jul28-2008> <12:50:10> SCF converged
<Jul28-2008> <12:50:29> 20 ErrMat 0.00000205 MaxEl -0.00000027
<Jul28-2008> <12:50:30> >>>> COREPS
<Jul28-2008> <12:50:41> >>>> TOTEN
<Jul28-2008> <12:52:54> >>>> POPAN
<Jul28-2008> <12:52:54> >>>> DEBYE
<Jul28-2008> <12:52:55> >>>> AMETS
<Jul28-2008> <12:52:57> Bond Energy LDA -6.65793403 a.u.
<Jul28-2008> <12:52:57> Bond Energy LDA -181.17160306 eV
<Jul28-2008> <12:52:57> + GGA-X -5.66404838 a.u.
<Jul28-2008> <12:52:57> + GGA-X -154.12659839 eV
<Jul28-2008> <12:52:57> + GGA-XC -6.09302987 a.u.
<Jul28-2008> <12:52:57> + GGA-XC -165.79977882 eV
<Jul28-2008> <12:52:57> >>>> POPUL
<Jul28-2008> <12:52:58> NORMAL TERMINATION
<Jul28-2008> <12:53:01> END
    
```

5. Geometry Optimizations using the BP/TZP(ZORA) method (all electron, no frozen core, scalar relativistic correction).



Electronic Supplementary Information for Dalton Transactions  
This journal is © The Royal Society of Chemistry 2009

cart. step max 0.00146043 0.01000000 YES 0.28842283  
cart. step rms 0.00041231 0.00666667 YES 0.35387470  
prediction dE : -0.00000331

\*\*\*\*\*  
Geometry CONVERGED  
\*\*\*\*\*

\*\*\*\*\*  
\* Final Geometry \*  
\*\*\*\*\*

Coordinates (Cartesian)  
=====

| Atom  | bohr      |           |           | angstrom  |           |           | Geometric Variables<br>(0:frozen, *:LT par.) |     |     |
|-------|-----------|-----------|-----------|-----------|-----------|-----------|----------------------------------------------|-----|-----|
|       | X         | Y         | Z         | X         | Y         | Z         |                                              |     |     |
| 1 C   | 6.447443  | -0.531322 | -5.759069 | 3.411840  | -0.281163 | -3.047568 | 1                                            | 2   | 3   |
| 2 H   | 2.358218  | -0.108261 | -5.724865 | 1.247915  | -0.057289 | -3.029468 | 4                                            | 5   | 6   |
| 3 O   | 0.238973  | 7.653803  | -4.748308 | 0.126459  | 4.050218  | -2.512697 | 7                                            | 8   | 9   |
| 4 C   | 4.157464  | 0.381159  | -4.849594 | 2.200035  | 0.201701  | -2.566295 | 10                                           | 11  | 12  |
| 5 C   | 8.661223  | 0.140944  | -4.482695 | 4.583322  | 0.074584  | -2.372140 | 13                                           | 14  | 15  |
| 6 Cl  | -2.113476 | -0.040095 | -3.623881 | -1.118404 | -0.021217 | -1.917675 | 16                                           | 17  | 18  |
| 7 C   | 0.362341  | 5.962929  | -3.347397 | 0.191743  | 3.155446  | -1.771366 | 19                                           | 20  | 21  |
| 8 N   | 4.004264  | 1.889482  | -2.803691 | 2.118965  | 0.999871  | -1.483650 | 22                                           | 23  | 24  |
| 9 O   | 3.238977  | -5.920843 | -2.472278 | 1.713993  | -3.133175 | -1.308273 | 25                                           | 26  | 27  |
| 10 C  | 8.507942  | 1.706041  | -2.380021 | 4.502209  | 0.902798  | -1.259453 | 28                                           | 29  | 30  |
| 11 O  | -4.438364 | -7.652991 | -1.876306 | -2.348681 | -4.049788 | -0.992898 | 31                                           | 32  | 33  |
| 12 H  | 10.212694 | 2.249944  | -1.367849 | 5.404325  | 1.190619  | -0.723835 | 34                                           | 35  | 36  |
| 13 C  | 1.565432  | -4.803020 | -1.579996 | 0.828391  | -2.541649 | -0.836098 | 37                                           | 38  | 39  |
| 14 C  | 6.146269  | 2.595662  | -1.551078 | 3.252465  | 1.373565  | -0.820795 | 40                                           | 41  | 42  |
| 15 C  | -3.224056 | -5.960428 | -1.167880 | -1.706097 | -3.154123 | -0.618016 | 43                                           | 44  | 45  |
| 16 Ru | 0.544850  | 3.232856  | -1.088235 | 0.288322  | 1.710753  | -0.575869 | 46                                           | 47  | 48  |
| 17 H  | -6.084611 | 0.167588  | -0.718683 | -3.219837 | 0.088684  | -0.380311 | 49                                           | 50  | 51  |
| 18 Ru | -1.226130 | -3.256879 | -0.035921 | -0.648840 | -1.723466 | -0.019008 | 52                                           | 53  | 54  |
| 19 C  | 5.744628  | 4.309243  | 0.579542  | 3.039926  | 2.280353  | 0.306680  | 55                                           | 56  | 57  |
| 20 C  | -2.159541 | 4.629632  | 0.719919  | -1.142780 | 2.449896  | 0.380965  | 58                                           | 59  | 60  |
| 21 C  | 3.210790  | 5.038883  | 1.099483  | 1.699077  | 2.666462  | 0.581821  | 61                                           | 62  | 63  |
| 22 C  | -6.216087 | -0.313256 | 1.280007  | -3.289412 | -0.165768 | 0.677351  | 64                                           | 65  | 66  |
| 23 O  | 0.997543  | -0.094535 | 1.134743  | 0.527877  | -0.050026 | 0.600480  | 67                                           | 68  | 69  |
| 24 H  | 9.692296  | 4.695724  | 1.643427  | 5.128942  | 2.484870  | 0.869664  | 70                                           | 71  | 72  |
| 25 H  | -9.644352 | 1.746006  | 2.000814  | -5.103571 | 0.923947  | 1.058785  | 73                                           | 74  | 75  |
| 26 C  | 7.753054  | 5.268008  | 2.040950  | 4.102739  | 2.787710  | 1.080024  | 76                                           | 77  | 78  |
| 27 O  | -3.743264 | 5.666094  | 1.850307  | -1.980850 | 2.998368  | 0.979140  | 79                                           | 80  | 81  |
| 28 N  | -4.332206 | -1.777742 | 2.175329  | -2.292505 | -0.940740 | 1.151135  | 82                                           | 83  | 84  |
| 29 H  | 2.687232  | -7.298173 | 2.603141  | 1.422022  | -3.862027 | 1.377523  | 85                                           | 86  | 87  |
| 30 C  | -8.169361 | 0.558173  | 2.804695  | -4.323040 | 0.295373  | 1.484181  | 88                                           | 89  | 90  |
| 31 C  | 2.801808  | 6.767215  | 3.076261  | 1.482653  | 3.581056  | 1.627887  | 91                                           | 92  | 93  |
| 32 H  | 0.893085  | 7.403807  | 3.520326  | 0.472600  | 3.917926  | 1.862876  | 94                                           | 95  | 96  |
| 33 C  | -0.578627 | -4.953009 | 3.407354  | -0.306196 | -2.621019 | 1.803094  | 97                                           | 98  | 99  |
| 34 C  | 7.295563  | 6.960285  | 4.002181  | 3.860646  | 3.683224  | 2.117863  | 100                                          | 101 | 102 |
| 35 C  | 1.374894  | -6.638117 | 4.047547  | 0.727563  | -3.512740 | 2.141870  | 103                                          | 104 | 105 |
| 36 C  | 4.810401  | 7.714412  | 4.511232  | 2.545555  | 4.082291  | 2.387241  | 106                                          | 107 | 108 |
| 37 H  | 8.860789  | 7.696894  | 5.121415  | 4.688928  | 4.073021  | 2.710136  | 109                                          | 110 | 111 |
| 38 C  | -4.315185 | -2.488017 | 4.658348  | -2.283498 | -1.316602 | 2.465092  | 112                                          | 113 | 114 |
| 39 C  | -8.160186 | -0.108280 | 5.361608  | -4.318185 | -0.057299 | 2.837241  | 115                                          | 116 | 117 |
| 40 H  | 4.431194  | 9.054223  | 6.033255  | 2.344887  | 4.791288  | 3.192661  | 118                                          | 119 | 120 |
| 41 C  | -2.244060 | -4.173360 | 5.370180  | -1.187505 | -2.208447 | 2.841777  | 121                                          | 122 | 123 |
| 42 C  | -6.232090 | -1.632494 | 6.285948  | -3.297880 | -0.863879 | 3.326380  | 124                                          | 125 | 126 |
| 43 H  | 1.688204  | -7.502277 | 6.524736  | 0.893359  | -3.970034 | 3.452742  | 127                                          | 128 | 129 |
| 44 C  | 3.224658  | -8.808011 | 6.959990  | 1.706416  | -4.660999 | 3.683068  | 130                                          | 131 | 132 |
| 45 H  | -9.652793 | 0.550189  | 6.621625  | -5.108038 | 0.291147  | 3.504013  | 133                                          | 134 | 135 |
| 46 C  | -1.906500 | -5.047799 | 7.864215  | -1.008876 | -2.671180 | 4.161563  | 136                                          | 137 | 138 |
| 47 H  | -6.207116 | -2.185968 | 8.265347  | -3.284664 | -1.156764 | 4.373833  | 139                                          | 140 | 141 |
| 48 C  | 0.049967  | -6.704383 | 8.445861  | 0.026442  | -3.547807 | 4.469357  | 142                                          | 143 | 144 |
| 49 H  | -3.178773 | -4.430883 | 9.363147  | -1.682134 | -2.344722 | 4.954764  | 145                                          | 146 | 147 |
| 50 H  | 0.300572  | -7.375427 | 10.377590 | 0.159056  | -3.902908 | 5.491584  | 148                                          | 149 | 150 |
| 51 H  | 10.492977 | -0.552956 | -5.124925 | 5.552644  | -0.292612 | -2.711993 | 151                                          | 152 | 153 |
| 52 H  | 6.478467  | -1.757891 | -7.410754 | 3.428257  | -0.930236 | -3.921602 | 154                                          | 155 | 156 |
| 53 H  | 0.887871  | 0.192114  | 2.954605  | 0.469841  | 0.101662  | 1.563510  | 157                                          | 158 | 159 |

Number of elements of the density matrix on this node (used, total): 219716 436645

=====  
Numerical Integration : Voronoi Polyhedra (Te Velde) \*\*\* (parameters, tests) \*\*\*  
=====

General Accuracy Parameter : 4.50

Symmetry used in the points section: NOSYM

Summary of the Symmetry Unique Points:

|                                |               |
|--------------------------------|---------------|
| Nr. of used Symmetry Operators | 1             |
| Points in the Atomic Spheres   | 34100         |
| Points in the Atomic Polyhedra | 348628        |
| Points in the Outer Region     | 29764         |
| Total                          | 412492        |
| Sum of Weights                 | 160167.237290 |
| Total nr. of points:           | 412492        |
| Nr. of blocks:                 | 3223          |
| Block length:                  | 128           |
| Nr. of dummy points:           | 52            |

Test of Precision of the Numerical Integration Grid  
=====

Integral of the Total Core Density: 0.000000000000

=====
   
B O N D I N G   E N E R G Y   \*\*\* (decomposition) \*\*\*
   
=====

\*\*\* WARNING \*\*\*

The bond energy is computed as an energy difference between molecule and fragments. In particular when the fragments are single atoms, they are usually computed as SPHERICALLY SYMMETRIC and SPIN-RESTRICTED. Obviously, this usually does NOT represent the true atomic groundstate.

To obtain the 'real' bond energy, (atomic) correction terms must be applied for the true (multiplet) fragment ground state. See ref: E.J.Baerends, V.Branchadell, M.Sodupe, Chem.Phys.Lett.265 (1997) 481

General theoretical background on the bond energy decomposition scheme used here (Morokuma-Ziegler) can be found in the review paper: F.M. Bickelhaupt and E.J. Baerends, "Kohn-Sham Density Functional Theory: Predicting and Understanding Chemistry" In: Rev. Comput. Chem.; Lipkowitz, K. B. and Boyd, D. E., Eds.; Wiley-VCH: New York, 2000, Vol. 15, 1-86.

Symbols used in the Bickelhaupt-Baerends (BB) paper are given below to make the direct connection to that paper, where detailed explanations can be found on the meaning of the various terms.

|                                                                                               | hartree                    | eV                | kcal/mol         | kJ/mol            |
|-----------------------------------------------------------------------------------------------|----------------------------|-------------------|------------------|-------------------|
| <b>Pauli Repulsion</b>                                                                        |                            |                   |                  |                   |
| Kinetic (Delta T^0):                                                                          | 155.557007744150241        | 4232.9216         | 97613.51         | 408414.87         |
| Delta V^Pauli Coulomb:                                                                        | -81.098440078174690        | -2206.8008        | -50890.04        | -212923.92        |
| Delta V^Pauli LDA-XC:                                                                         | -19.207658116836846        | -522.6670         | -12052.99        | -50429.70         |
| Delta V^Pauli GGA-Exchange:                                                                   | 1.115283271728579          | 30.3484           | 699.85           | 2928.18           |
| Delta V^Pauli GGA-Correlation:                                                                | -0.312524211671960         | -8.5042           | -196.11          | -820.53           |
| <b>Total Pauli Repulsion:</b>                                                                 | <b>56.053668609195327</b>  | <b>1525.2979</b>  | <b>35174.21</b>  | <b>147168.89</b>  |
| (Total Pauli Repulsion =<br>Delta E^Pauli in the BB paper)                                    |                            |                   |                  |                   |
| <b>Steric Interaction</b>                                                                     |                            |                   |                  |                   |
| Pauli Repulsion (Delta E^Pauli):                                                              | 56.053668609195327         | 1525.2979         | 35174.21         | 147168.89         |
| Electrostatic Interaction:                                                                    | -11.929644924816984        | -324.6222         | -7485.97         | -31321.28         |
| (Electrostatic Interaction =<br>Delta V_elstat in the BB paper)                               |                            |                   |                  |                   |
| <b>Total Steric Interaction:</b>                                                              | <b>44.124023684378344</b>  | <b>1200.6758</b>  | <b>27688.25</b>  | <b>115847.61</b>  |
| (Total Steric Interaction =<br>Delta E^0 in the BB paper)                                     |                            |                   |                  |                   |
| <b>Orbital Interactions</b>                                                                   |                            |                   |                  |                   |
| A:                                                                                            | -57.413155836783410        | -1562.2915        | -36027.30        | -150738.22        |
| <b>Total Orbital Interactions:</b>                                                            | <b>-57.41855668335266</b>  | <b>-1562.4384</b> | <b>-36030.69</b> | <b>-150752.40</b> |
| <b>Alternative Decomposition Orb.Int.</b>                                                     |                            |                   |                  |                   |
| Kinetic:                                                                                      | -142.952114418546699       | -3889.9250        | -89703.82        | -375320.72        |
| Coulomb:                                                                                      | 78.799581080777116         | 2144.2457         | 49447.49         | 206888.27         |
| XC:                                                                                           | 6.733977669434484          | 183.2409          | 4225.64          | 17680.06          |
| <b>Total Orbital Interactions:</b>                                                            | <b>-57.41855668335102</b>  | <b>-1562.4384</b> | <b>-36030.69</b> | <b>-150752.40</b> |
| Residu (E=Steric+OrbInt+Res):                                                                 | 0.000007390452793          | 0.0002            | 0.00             | 0.02              |
| <b>Total Bonding Energy:</b>                                                                  | <b>-13.294524593504130</b> | <b>-361.7624</b>  | <b>-8342.44</b>  | <b>-34904.77</b>  |
| <b>Summary of Bonding Energy (energy terms are taken from the energy decomposition above)</b> |                            |                   |                  |                   |
| Electrostatic Energy:                                                                         | -11.929644924816984        | -324.6222         | -7485.97         | -31321.28         |
| Kinetic Energy:                                                                               | 12.604893325603541         | 342.9966          | 7909.69          | 33094.14          |
| Coulomb (Steric+OrbInt) Energy:                                                               | -2.298851606944780         | -62.5549          | -1442.55         | -6035.63          |
| XC Energy:                                                                                    | -11.670921387345743        | -317.5819         | -7323.61         | -30642.00         |
| <b>Total Bonding Energy:</b>                                                                  | <b>-13.294524593503965</b> | <b>-361.7624</b>  | <b>-8342.44</b>  | <b>-34904.77</b>  |

Correction terms (incorporated in energies above; only for test purposes):

1. Indication of fit-quality: 1st-order fit-correction used in the energy (hartree): -0.0133455155
2. Electrostatic (Fit correction): 0.0000000000

Scaled ZORA energy correction, not included in bonding energy (hartree): -0.0009478079

WARNING: This scaled ZORA energy correction should only be used to compare two calculations in which the only difference in the calculation is the electron configuration.

Then the difference in energy of this term should be added to the difference in energy of the two electron configurations.

This term should not be used otherwise.

In practice it is useful only for core excitation energy calculations.

### (1) Bond Order Analysis

| DIST. [A] |        |    | BOND-ORDERS<br>(THRESHOLD = 0.050 ) |        |         |         |             |        |
|-----------|--------|----|-------------------------------------|--------|---------|---------|-------------|--------|
|           |        |    | MAYER                               | G-J    | N-M (1) | N-M (2) | N-M (3) (*) |        |
| C         | 1 - C  | 4  | 1.3904                              | 1.4250 | 1.4339  | 1.4916  | 1.4816      | 1.5295 |
| C         | 1 - C  | 5  | 1.3983                              | 1.3579 | 1.4012  | 1.4598  | 1.4247      | 1.5171 |
| C         | 1 - C  | 14 | 2.7789                              | 0.0596 | 0.0939  | 0.0972  | 0.1248      | 0.0977 |
| C         | 1 - H  | 52 | 1.0888                              | 1.0290 | 0.9226  | 0.9701  | 0.9854      | 0.9043 |
| H         | 2 - C  | 4  | 1.0900                              | 1.0156 | 0.8980  | 0.9387  | 0.9257      | 0.8546 |
| O         | 3 - C  | 7  | 1.1638                              | 2.0400 | 2.1882  | 2.3656  | 2.3764      | 2.4081 |
| O         | 3 - Ru | 16 | 3.0415                              | 0.2177 | 0.2501  | 0.2905  | 0.4152      | 0.2863 |
| C         | 4 - N  | 8  | 1.3475                              | 1.3762 | 1.3958  | 1.4723  | 1.4588      | 1.5194 |
| C         | 4 - C  | 10 | 2.7385                              | 0.0637 | 0.1079  | 0.1122  | 0.1088      | 0.1149 |

Electronic Supplementary Information for Dalton Transactions  
This journal is © The Royal Society of Chemistry 2009

|                    |    |      |    |         |         |         |         |         |        |
|--------------------|----|------|----|---------|---------|---------|---------|---------|--------|
| C                  | 5  | - N  | 8  | 2.7782  | 0.0382  | 0.0940  | 0.0993  | 0.0694  | 0.1038 |
| C                  | 5  | - C  | 10 | 1.3895  | 1.4126  | 1.4674  | 1.5277  | 1.4948  | 1.5852 |
| C                  | 5  | - H  | 51 | 1.0908  | 1.0271  | 0.9236  | 0.9687  | 0.9750  | 0.8982 |
| Cl                 | 6  | - Ru | 16 | 2.6037  | 0.4318  | 0.2567  | 0.3314  | 0.5688  | 0.3756 |
| Cl                 | 6  | - Ru | 18 | 2.5929  | 0.4373  | 0.2629  | 0.3399  | 0.5765  | 0.3851 |
| Cl                 | 6  | - C  | 21 | 4.6270  | 0.0538  | 0.1062  | 0.1288  | 0.0582  | 0.1555 |
| Cl                 | 6  | - C  | 33 | 4.6112  | 0.0540  | 0.1073  | 0.1302  | 0.0570  | 0.1573 |
| C                  | 7  | - Ru | 16 | 1.8777  | 1.0946  | 1.0924  | 1.1869  | 1.0249  | 1.0878 |
| C                  | 7  | - C  | 20 | 2.6289  | 0.0895  | 0.0748  | 0.0752  | 0.0386  | 0.0713 |
| C                  | 7  | - O  | 23 | 4.0017  | 0.0586  | 0.1314  | 0.1552  | 0.2860  | 0.1770 |
| N                  | 8  | - C  | 14 | 1.3652  | 1.2915  | 1.3082  | 1.3725  | 1.3922  | 1.3899 |
| N                  | 8  | - Ru | 16 | 2.1635  | 0.2462  | 0.3291  | 0.3685  | 0.4824  | 0.3580 |
| N                  | 8  | - C  | 20 | 4.0272  | 0.0436  | 0.1185  | 0.1231  | 0.1615  | 0.1239 |
| O                  | 9  | - C  | 13 | 1.1650  | 2.0089  | 2.1780  | 2.3578  | 2.3689  | 2.4031 |
| O                  | 9  | - Ru | 18 | 3.0385  | 0.2271  | 0.2514  | 0.2926  | 0.4222  | 0.2889 |
| C                  | 10 | - H  | 12 | 1.0879  | 1.0174  | 0.9217  | 0.9638  | 0.9771  | 0.9030 |
| C                  | 10 | - C  | 14 | 1.4057  | 1.3708  | 1.3455  | 1.3910  | 1.4084  | 1.3968 |
| O                  | 11 | - C  | 15 | 1.1643  | 2.0384  | 2.1862  | 2.3634  | 2.3741  | 2.4065 |
| O                  | 11 | - Ru | 18 | 3.0413  | 0.2188  | 0.2524  | 0.2936  | 0.4188  | 0.2894 |
| C                  | 13 | - C  | 15 | 2.6165  | 0.0918  | 0.0740  | 0.0745  | 0.0337  | 0.0704 |
| C                  | 13 | - Ru | 18 | 1.8760  | 1.0673  | 1.0907  | 1.1875  | 1.0235  | 1.0876 |
| C                  | 13 | - N  | 28 | 4.0314  | 0.0429  | 0.1185  | 0.1233  | 0.1682  | 0.1239 |
| C                  | 14 | - C  | 19 | 1.4624  | 1.1703  | 1.0997  | 1.1326  | 1.1341  | 1.1168 |
| C                  | 15 | - Ru | 18 | 1.8771  | 1.0976  | 1.0987  | 1.1956  | 1.0335  | 1.0957 |
| C                  | 15 | - O  | 23 | 4.0138  | 0.0555  | 0.1294  | 0.1528  | 0.2833  | 0.1743 |
| Ru                 | 16 | - C  | 20 | 1.8735  | 1.1026  | 1.1066  | 1.2019  | 1.0512  | 1.1042 |
| Ru                 | 16 | - C  | 21 | 2.0601  | 0.6435  | 0.7555  | 0.8223  | 0.8648  | 0.7861 |
| Ru                 | 16 | - O  | 23 | 2.1311  | 0.3609  | 0.3272  | 0.4126  | 0.7930  | 0.4550 |
| Ru                 | 16 | - O  | 27 | 3.0373  | 0.2297  | 0.2582  | 0.3003  | 0.4329  | 0.2968 |
| H                  | 17 | - C  | 22 | 1.0901  | 1.0149  | 0.8968  | 0.9375  | 0.9242  | 0.8529 |
| Ru                 | 18 | - O  | 23 | 2.1375  | 0.3324  | 0.3178  | 0.4013  | 0.7836  | 0.4424 |
| Ru                 | 18 | - N  | 28 | 2.1641  | 0.2595  | 0.3317  | 0.3722  | 0.4915  | 0.3621 |
| Ru                 | 18 | - C  | 33 | 2.0599  | 0.6370  | 0.7529  | 0.8211  | 0.8666  | 0.7854 |
| C                  | 19 | - C  | 21 | 1.4222  | 1.3382  | 1.3157  | 1.3447  | 1.3380  | 1.3703 |
| C                  | 19 | - C  | 26 | 1.4089  | 1.3443  | 1.3462  | 1.3951  | 1.3853  | 1.4278 |
| C                  | 19 | - C  | 36 | 2.7964  | 0.0536  | 0.0933  | 0.0967  | 0.0912  | 0.0989 |
| C                  | 20 | - O  | 27 | 1.1666  | 1.9992  | 2.1613  | 2.3393  | 2.3477  | 2.3937 |
| C                  | 21 | - C  | 31 | 1.4063  | 1.4090  | 1.4148  | 1.4495  | 1.4188  | 1.5034 |
| C                  | 21 | - C  | 34 | 2.8400  | 0.0415  | 0.0993  | 0.1019  | 0.0787  | 0.1057 |
| C                  | 22 | - N  | 28 | 1.3487  | 1.3732  | 1.3921  | 1.4695  | 1.4550  | 1.5184 |
| C                  | 22 | - C  | 30 | 1.3900  | 1.4257  | 1.4350  | 1.4927  | 1.4828  | 1.5303 |
| C                  | 22 | - C  | 42 | 2.7395  | 0.0637  | 0.1073  | 0.1115  | 0.1080  | 0.1142 |
| O                  | 23 | - H  | 53 | 0.9766  | 1.1245  | 0.8493  | 1.0732  | 1.1620  | 1.0606 |
| H                  | 24 | - C  | 26 | 1.0904  | 1.0260  | 0.9265  | 0.9632  | 0.9741  | 0.9093 |
| H                  | 25 | - C  | 30 | 1.0887  | 1.0287  | 0.9220  | 0.9699  | 0.9850  | 0.9033 |
| C                  | 26 | - C  | 31 | 2.7918  | 0.0601  | 0.1087  | 0.1130  | 0.0829  | 0.1176 |
| C                  | 26 | - C  | 34 | 1.3920  | 1.4097  | 1.4627  | 1.5223  | 1.4816  | 1.5857 |
| N                  | 28 | - C  | 38 | 1.3667  | 1.2858  | 1.3057  | 1.3708  | 1.3894  | 1.3916 |
| N                  | 28 | - C  | 39 | 2.7797  | 0.0380  | 0.0930  | 0.0983  | 0.0671  | 0.1029 |
| H                  | 29 | - C  | 35 | 1.0902  | 1.0248  | 0.9217  | 0.9608  | 0.9731  | 0.9021 |
| C                  | 30 | - C  | 38 | 2.7786  | 0.0579  | 0.0931  | 0.0963  | 0.1220  | 0.0969 |
| C                  | 30 | - C  | 39 | 1.3983  | 1.3571  | 1.4003  | 1.4589  | 1.4242  | 1.5158 |
| C                  | 31 | - H  | 32 | 1.0904  | 1.0242  | 0.9227  | 0.9613  | 0.9745  | 0.9048 |
| C                  | 31 | - C  | 36 | 1.3991  | 1.3958  | 1.4334  | 1.4888  | 1.4494  | 1.5500 |
| C                  | 33 | - C  | 35 | 1.4066  | 1.4054  | 1.4091  | 1.4440  | 1.4136  | 1.4973 |
| C                  | 33 | - C  | 41 | 1.4233  | 1.3398  | 1.3171  | 1.3469  | 1.3384  | 1.3753 |
| C                  | 33 | - C  | 48 | 2.8423  | 0.0412  | 0.0982  | 0.1008  | 0.0767  | 0.1047 |
| C                  | 34 | - C  | 36 | 1.4005  | 1.3695  | 1.4070  | 1.4640  | 1.4242  | 1.5247 |
| C                  | 34 | - H  | 37 | 1.0903  | 1.0320  | 0.9285  | 0.9723  | 0.9858  | 0.9133 |
| C                  | 35 | - C  | 43 | 1.3982  | 1.4017  | 1.4387  | 1.4940  | 1.4568  | 1.5537 |
| C                  | 35 | - C  | 46 | 2.7933  | 0.0609  | 0.1097  | 0.1139  | 0.0846  | 0.1186 |
| C                  | 36 | - H  | 40 | 1.0916  | 1.0305  | 0.9273  | 0.9690  | 0.9796  | 0.9068 |
| C                  | 38 | - C  | 41 | 1.4624  | 1.1759  | 1.1021  | 1.1353  | 1.1383  | 1.1222 |
| C                  | 38 | - C  | 42 | 1.4056  | 1.3715  | 1.3458  | 1.3915  | 1.4078  | 1.3993 |
| C                  | 39 | - C  | 42 | 1.3896  | 1.4130  | 1.4666  | 1.5271  | 1.4937  | 1.5850 |
| C                  | 39 | - H  | 45 | 1.0908  | 1.0279  | 0.9232  | 0.9686  | 0.9748  | 0.8975 |
| C                  | 41 | - C  | 43 | 2.7940  | 0.0516  | 0.0916  | 0.0949  | 0.0878  | 0.0972 |
| C                  | 41 | - C  | 46 | 1.4099  | 1.3371  | 1.3405  | 1.3897  | 1.3777  | 1.4246 |
| C                  | 42 | - H  | 47 | 1.0877  | 1.0174  | 0.9215  | 0.9639  | 0.9776  | 0.9030 |
| C                  | 43 | - H  | 44 | 1.0916  | 1.0302  | 0.9268  | 0.9688  | 0.9791  | 0.9057 |
| C                  | 43 | - C  | 48 | 1.4012  | 1.3641  | 1.4018  | 1.4586  | 1.4194  | 1.5185 |
| C                  | 46 | - C  | 48 | 1.3911  | 1.4162  | 1.4680  | 1.5280  | 1.4866  | 1.5921 |
| C                  | 46 | - H  | 49 | 1.0904  | 1.0256  | 0.9266  | 0.9634  | 0.9746  | 0.9098 |
| C                  | 48 | - H  | 50 | 1.0902  | 1.0311  | 0.9282  | 0.9721  | 0.9856  | 0.9126 |
| Sum :              |    |      |    | 73.0920 | 73.9395 | 78.3976 | 78.3976 | 78.3976 |        |
| Atomic summation : |    |      |    |         |         |         |         |         |        |
| C                  | 1  |      |    | 3.9621  | 3.9820  | 4.1562  | 4.1535  | 4.1884  |        |
| H                  | 2  |      |    | 1.0750  | 0.9780  | 1.0271  | 1.0416  | 0.9404  |        |
| O                  | 3  |      |    | 2.2940  | 2.5121  | 2.7408  | 2.7441  | 2.7870  |        |
| C                  | 4  |      |    | 3.9843  | 3.9576  | 4.1464  | 4.1100  | 4.1516  |        |
| C                  | 5  |      |    | 3.9287  | 3.9752  | 4.1489  | 4.1277  | 4.1965  |        |
| Cl                 | 6  |      |    | 1.1067  | 1.0056  | 1.2677  | 1.3564  | 1.4715  |        |
| C                  | 7  |      |    | 3.3918  | 3.6364  | 3.9417  | 3.8741  | 3.9062  |        |
| N                  | 8  |      |    | 3.1966  | 3.4871  | 3.6939  | 3.6981  | 3.7630  |        |
| O                  | 9  |      |    | 2.2775  | 2.5025  | 2.7335  | 2.7393  | 2.7819  |        |
| O                  | 10 |      |    | 3.9657  | 3.9864  | 4.1454  | 4.1393  | 4.1529  |        |
| H                  | 11 |      |    | 2.2933  | 2.5112  | 2.7404  | 2.7439  | 2.7870  |        |
| C                  | 12 |      |    | 1.0413  | 0.9801  | 1.0251  | 1.0360  | 0.9593  |        |
| C                  | 13 |      |    | 3.3668  | 3.6165  | 3.9114  | 3.8571  | 3.8612  |        |
| C                  | 14 |      |    | 4.1104  | 4.0033  | 4.1565  | 4.1498  | 4.1592  |        |
| Ru                 | 15 |      |    | 3.3958  | 3.6377  | 3.9448  | 3.8766  | 3.9090  |        |
| H                  | 16 |      |    | 4.3883  | 4.5880  | 5.1495  | 5.2200  | 4.9705  |        |
| Ru                 | 17 |      |    | 1.0764  | 0.9777  | 1.0270  | 1.0417  | 0.9400  |        |
| H                  | 18 |      |    | 4.3389  | 4.5733  | 5.1422  | 5.2123  | 4.9602  |        |
| Ru                 | 19 |      |    | 4.0365  | 4.0202  | 4.1434  | 4.1311  | 4.1866  |        |
| C                  | 20 |      |    | 3.3929  | 3.6238  | 3.9159  | 3.8555  | 3.8779  |        |
| C                  | 21 |      |    | 3.7915  | 3.9741  | 4.1400  | 4.0969  | 4.2196  |        |
| C                  | 22 |      |    | 3.9887  | 3.9567  | 4.1466  | 4.1091  | 4.1530  |        |
| O                  | 23 |      |    | 1.9896  | 1.9593  | 2.4427  | 2.6368  | 2.6008  |        |
| H                  | 24 |      |    | 1.0389  | 0.9868  | 1.0260  | 1.0346  | 0.9672  |        |
| H                  | 25 |      |    | 1.0463  | 0.9742  | 1.0251  | 1.0380  | 0.9539  |        |
| C                  | 26 |      |    | 3.9671  | 3.9921  | 4.1497  | 4.1429  | 4.1988  |        |
| O                  | 27 |      |    | 2.2740  | 2.4969  | 2.7276  | 2.7371  | 2.7855  |        |
| N                  | 28 |      |    | 3.1930  | 3.4801  | 3.6895  | 3.6965  | 3.7638  |        |
| H                  | 29 |      |    | 1.0713  | 0.9830  | 1.0254  | 1.0354  | 0.9616  |        |
| C                  | 30 |      |    | 3.9607  | 3.9815  | 4.1559  | 4.1527  | 4.1868  |        |
| C                  | 31 |      |    | 4.0117  | 3.9885  | 4.1286  | 4.1221  | 4.1917  |        |
| H                  | 32 |      |    | 1.0694  | 0.9841  | 1.0260  | 1.0352  | 0.9644  |        |
| C                  | 33 |      |    | 3.7869  | 3.9695  | 4.1387  | 4.0962  | 4.2217  |        |
| C                  | 34 |      |    | 3.9570  | 3.9857  | 4.1536  | 4.1459  | 4.2218  |        |
| C                  | 35 |      |    | 4.0143  | 3.9878  | 4.1284  | 4.1200  | 4.1870  |        |
| C                  | 36 |      |    | 3.9711  | 3.9853  | 4.1497  | 4.1351  | 4.2129  |        |
| H                  | 37 |      |    | 1.0446  | 0.9805  | 1.0267  | 1.0369  | 0.9632  |        |



|   |    |        |        |        |        |        |
|---|----|--------|--------|--------|--------|--------|
| C | 38 | 4.1062 | 4.0035 | 4.1580 | 4.1488 | 4.1688 |
| C | 39 | 3.9318 | 3.9746 | 4.1490 | 4.1274 | 4.1963 |
| H | 40 | 1.0411 | 0.9797 | 1.0238 | 1.0350 | 0.9572 |
| C | 41 | 4.0324 | 4.0187 | 4.1436 | 4.1316 | 4.1944 |
| C | 42 | 3.9641 | 3.9860 | 4.1456 | 4.1403 | 4.1555 |
| C | 43 | 3.9742 | 3.9845 | 4.1490 | 4.1343 | 4.2091 |
| H | 44 | 1.0402 | 0.9793 | 1.0236 | 1.0352 | 0.9560 |
| H | 45 | 1.0379 | 0.9755 | 1.0235 | 1.0378 | 0.9469 |
| C | 46 | 3.9632 | 3.9920 | 4.1504 | 4.1440 | 4.2028 |
| H | 47 | 1.0432 | 0.9797 | 1.0251 | 1.0360 | 0.9591 |
| C | 48 | 3.9579 | 3.9853 | 4.1536 | 4.1456 | 4.2215 |
| H | 49 | 1.0398 | 0.9868 | 1.0262 | 1.0346 | 0.9677 |
| H | 50 | 1.0442 | 0.9802 | 1.0266 | 1.0370 | 0.9626 |
| H | 51 | 1.0368 | 0.9759 | 1.0236 | 1.0377 | 0.9476 |
| H | 52 | 1.0459 | 0.9746 | 1.0252 | 1.0378 | 0.9548 |
| H | 53 | 1.1261 | 0.8818 | 1.1103 | 1.0528 | 1.0910 |

(\*) Values from:  
 - Mayer bond-order analysis  
 - Gopinatan-Jug bond order analysis  
 - Nalewajski-Mrozek bond order analysis  
 a) N-M (1) - bond-orders calculated from two-electron valence indices based on partitioning of  $\text{tr}(\Delta_P^2)$  (3-index set)  
 b) N-M (2) - bond-orders calculated from two-electron valence indices based on partitioning of  $\text{tr}(\Delta_P^2)$  (4-index set)  
 c) N-M (3) - bond-orders calculated from valence indices based on partitioning of  $\text{tr}(P^*\Delta_P)$   
 A. Michalak, R.L. DeRock, T. Ziegler, J. Comp. Chem., *subm.*  
 and original articles by Nalewajski et al. )

(2) NPA- NBO (gennbo extension for ADF)

\*\*\*\*\* NBO 5.0 \*\*\*\*\*  
 NATURAL ATOMIC ORBITAL AND  
 NATURAL BOND ORBITAL ANALYSIS  
 \*\*\*\*\*  
 (c) Copyright 1996-2003 Board of Regents of the University of Wisconsin System  
 on behalf of the Theoretical Chemistry Institute. All Rights Reserved.

Cite this program as:

NBO 5.0. E. D. Glendening, J. K. Badenhoop, A. E. Reed,  
 J. E. Carpenter, J. A. Bohmann, C. M. Morales, and F. Weinhold  
 (Theoretical Chemistry Institute, University of Wisconsin,  
 Madison, WI, 2001); <http://www.chem.wisc.edu/~nbo5>

/3CBOND / : Search for 3-center bonds  
 /NLMO / : Form Natural Localized Molecular Orbitals  
 /NRT / : Natural Resonance Theory Analysis  
 /AONBO / : Write the AO to NBO transformation to LFN 37  
 /AONLMO / : Write the AO to NLMO transformation to LFN 39  
 /NAOMO / : Print core and valence MOs in the NAO basis  
 /NBNLMO / : Write the NBO to NLMO transformation to LFN 49  
 /NLMOMO / : Write the NLMO to MO transformation to LFN 49  
 /STERIC / : Print NBO/NLMO steric analysis  
 /CMO / : Print analysis of canonical MOs  
 /FILE / : Set to nbodata

Job title: \*\*\*axial-OH

Summary of Natural Population Analysis:

| Atom No | Natural Charge | Natural Population |         |         |         |
|---------|----------------|--------------------|---------|---------|---------|
|         |                | Core               | Valence | Rydberg | Total   |
| C 1     | -0.25120       | 1.99935            | 4.23956 | 0.01230 | 6.25120 |
| C 2     | 0.03320        | 1.99936            | 3.94726 | 0.02018 | 5.96680 |
| C 3     | -0.16496       | 1.99938            | 4.15427 | 0.01131 | 6.16496 |
| C 4     | 0.59977        | 1.99945            | 3.35633 | 0.04445 | 5.40023 |
| C 5     | -0.22612       | 1.99929            | 4.21548 | 0.01135 | 6.22612 |
| C 6     | 0.60719        | 1.99946            | 3.34582 | 0.04752 | 5.39281 |
| C 7     | 0.20481        | 1.99926            | 3.77282 | 0.02311 | 5.79519 |
| C 8     | 0.59860        | 1.99945            | 3.35766 | 0.04429 | 5.40140 |
| C 9     | -0.13788       | 1.99918            | 4.11823 | 0.02047 | 6.13788 |
| C 10    | 0.58710        | 1.99946            | 3.36488 | 0.04855 | 5.41290 |
| C 11    | -0.02592       | 1.99908            | 3.98746 | 0.03938 | 6.02592 |
| C 12    | 0.03265        | 1.99936            | 3.94735 | 0.02065 | 5.96735 |
| C 13    | -0.18368       | 1.99930            | 4.17247 | 0.01191 | 6.18368 |
| C 14    | -0.24986       | 1.99935            | 4.23820 | 0.01231 | 6.24986 |
| C 15    | -0.26811       | 1.99930            | 4.25308 | 0.01574 | 6.26811 |
| C 16    | -0.03141       | 1.99908            | 3.99306 | 0.03927 | 6.03141 |
| C 17    | -0.23275       | 1.99937            | 4.22049 | 0.01290 | 6.23275 |
| C 18    | -0.25893       | 1.99930            | 4.24397 | 0.01566 | 6.25893 |
| C 19    | -0.19217       | 1.99937            | 4.18049 | 0.01231 | 6.19217 |
| C 20    | 0.19458        | 1.99926            | 3.78315 | 0.02301 | 5.80542 |
| C 21    | -0.16440       | 1.99938            | 4.15367 | 0.01135 | 6.16440 |
| C 22    | -0.14973       | 1.99919            | 4.13036 | 0.02018 | 6.14973 |
| C 23    | -0.22898       | 1.99929            | 4.21823 | 0.01147 | 6.22898 |
| C 24    | -0.18951       | 1.99937            | 4.17794 | 0.01220 | 6.18951 |
| C 25    | -0.18684       | 1.99930            | 4.17545 | 0.01209 | 6.18684 |
| C 26    | -0.23225       | 1.99937            | 4.21999 | 0.01289 | 6.23225 |
| H 27    | 0.23467        | 0.00000            | 0.76240 | 0.00293 | 0.76533 |
| H 28    | 0.22130        | 0.00000            | 0.77698 | 0.00172 | 0.77870 |
| H 29    | 0.23671        | 0.00000            | 0.76032 | 0.00297 | 0.76329 |
| H 30    | 0.20382        | 0.00000            | 0.79423 | 0.00195 | 0.79618 |
| H 31    | 0.23351        | 0.00000            | 0.76500 | 0.00149 | 0.76649 |
| H 32    | 0.21756        | 0.00000            | 0.77981 | 0.00263 | 0.78244 |
| H 33    | 0.21556        | 0.00000            | 0.78174 | 0.00270 | 0.78444 |
| H 34    | 0.21690        | 0.00000            | 0.78135 | 0.00174 | 0.78310 |
| H 35    | 0.21692        | 0.00000            | 0.78156 | 0.00152 | 0.78308 |



|     |           |          |        |       |         |         |         |         |         |        |
|-----|-----------|----------|--------|-------|---------|---------|---------|---------|---------|--------|
|     |           | 0.219%   | C      | 7 s(  | 3.52%)  | p27.05( | 95.18%) | d       | 0.37(   | 1.30%) |
|     |           | 0.141%   | C      | 9 s(  | 30.89%) | p       | 2.23(   | 68.72%) | d       | 0.01(  |
|     |           | 0.019%   | H      | 28 s( | 88.98%) | p       | 0.12(   | 11.02%) |         |        |
|     |           | 0.017%   | H      | 41 s( | 83.19%) | p       | 0.20(   | 16.81%) |         |        |
|     |           | 0.154%   | H      | 42 s( | 99.57%) | p       | 0.00(   | 0.43%)  |         |        |
|     |           | 0.021%   | N      | 50 s( | 25.17%) | p       | 2.96(   | 74.52%) | d       | 0.01(  |
| 8.  | (2.00000) | 80.9478% | BD (2) | C     | 3- C    | 5       |         |         |         |        |
|     |           | 3.229%   | C      | 1 s(  | 0.00%)  | p       | 1.00(   | 99.52%) | d       | 0.00(  |
|     |           | 2.851%   | C      | 2 s(  | 0.00%)  | p       | 1.00(   | 99.85%) | d       | 0.00(  |
|     |           | 35.996%  | C      | 3 s(  | 0.00%)  | p       | 1.00(   | 99.96%) | d       | 0.00(  |
|     |           | 45.054%  | C      | 5 s(  | 0.00%)  | p       | 1.00(   | 99.97%) | d       | 0.00(  |
|     |           | 9.937%   | C      | 7 s(  | 0.00%)  | p       | 1.00(   | 99.79%) | d       | 0.00(  |
|     |           | 0.182%   | C      | 9 s(  | 0.00%)  | p       | 1.00(   | 98.46%) | d       | 0.02(  |
|     |           | 0.023%   | C      | 10 s( | 0.12%)  | p99.99( | 99.40%) | d       | 3.84(   | 0.47%) |
|     |           | 0.115%   | C      | 11 s( | 0.34%)  | p99.99( | 99.61%) | d       | 0.15(   | 0.05%) |
|     |           | 0.050%   | C      | 13 s( | 0.02%)  | p99.99( | 98.89%) | d60.18( | 1.09%)  |        |
|     |           | 0.053%   | C      | 19 s( | 0.02%)  | p99.99( | 99.93%) | d       | 3.03(   | 0.06%) |
|     |           | 0.012%   | H      | 28 s( | 0.20%)  | p99.99( | 99.80%) |         |         |        |
|     |           | 0.010%   | H      | 41 s( | 0.08%)  | p99.99( | 99.92%) |         |         |        |
|     |           | 2.431%   | N      | 50 s( | 0.01%)  | p99.99( | 99.82%) | d16.44( | 0.17%)  |        |
| 9.  | (2.00000) | 98.9221% | BD (1) | C     | 3- H    | 41      |         |         |         |        |
|     |           | 0.220%   | C      | 1 s(  | 6.07%)  | p15.30( | 92.81%) | d       | 0.19(   | 1.13%) |
|     |           | 0.180%   | C      | 2 s(  | 39.86%) | p       | 1.49(   | 59.49%) | d       | 0.02(  |
|     |           | 60.722%  | C      | 3 s(  | 28.37%) | p       | 2.52(   | 71.56%) | d       | 0.00(  |
|     |           | 0.251%   | C      | 5 s(  | 6.09%)  | p15.23( | 92.78%) | d       | 0.19(   | 1.13%) |
|     |           | 0.199%   | C      | 7 s(  | 30.57%) | p       | 2.25(   | 68.84%) | d       | 0.02(  |
|     |           | 0.013%   | C      | 9 s(  | 40.52%) | p       | 1.46(   | 59.16%) | d       | 0.01(  |
|     |           | 0.010%   | H      | 27 s( | 99.93%) | p       | 0.00(   | 0.07%)  |         |        |
|     |           | 0.063%   | H      | 28 s( | 99.30%) | p       | 0.01(   | 0.70%)  |         |        |
|     |           | 38.208%  | H      | 41 s( | 99.96%) | p       | 0.00(   | 0.04%)  |         |        |
|     |           | 0.061%   | H      | 42 s( | 99.29%) | p       | 0.01(   | 0.71%)  |         |        |
|     |           | 0.036%   | N      | 50 s( | 66.31%) | p       | 0.50(   | 33.19%) | d       | 0.01(  |
|     |           | 0.011%   | Ru     | 52 s( | 37.34%) | p       | 0.31(   | 11.66%) | d       | 1.37(  |
| 10. | (2.00000) | 99.8741% | BD (1) | C     | 4- O    | 44      |         |         |         |        |
|     |           | 25.075%  | C      | 4 s(  | 0.01%)  | p99.99( | 99.76%) | d22.19( | 0.23%)  |        |
|     |           | 0.013%   | C      | 11 s( | 22.06%) | p       | 3.51(   | 77.52%) | d       | 0.02(  |
|     |           | 74.800%  | O      | 44 s( | 0.01%)  | p       | 1.00(   | 99.60%) | d       | 0.00(  |
|     |           | 0.078%   | Ru     | 52 s( | 0.37%)  | p56.21( | 21.08%) | d99.99( | 78.55%) |        |
| 11. | (2.00000) | 99.8665% | BD (2) | C     | 4- O    | 44      |         |         |         |        |
|     |           | 25.641%  | C      | 4 s(  | 0.00%)  | p       | 1.00(   | 99.78%) | d       | 0.00(  |
|     |           | 0.023%   | C      | 10 s( | 21.81%) | p       | 3.55(   | 77.33%) | d       | 0.04(  |
|     |           | 74.226%  | O      | 44 s( | 0.00%)  | p       | 1.00(   | 99.61%) | d       | 0.00(  |
|     |           | 0.069%   | Ru     | 52 s( | 0.02%)  | p99.99( | 23.48%) | d99.99( | 76.50%) |        |
| 12. | (2.00000) | 99.7651% | BD (3) | C     | 4- O    | 44      |         |         |         |        |
|     |           | 31.712%  | C      | 4 s(  | 39.96%) | p       | 1.50(   | 59.98%) | d       | 0.00(  |
|     |           | 0.020%   | C      | 10 s( | 56.26%) | p       | 0.77(   | 43.31%) | d       | 0.01(  |
|     |           | 0.014%   | C      | 11 s( | 14.81%) | p       | 5.74(   | 85.03%) | d       | 0.01(  |
|     |           | 68.059%  | O      | 44 s( | 43.21%) | p       | 1.30(   | 56.01%) | d       | 0.02(  |
|     |           | 0.166%   | Ru     | 52 s( | 28.94%) | p       | 1.22(   | 35.36%) | d       | 1.23(  |
| 13. | (2.00000) | 96.2396% | BD (1) | C     | 4-Ru    | 52      |         |         |         |        |
|     |           | 0.042%   | C      | 2 s(  | 8.14%)  | p11.20( | 91.26%) | d       | 0.07(   | 0.60%) |
|     |           | 0.011%   | C      | 3 s(  | 3.71%)  | p25.95( | 96.18%) | d       | 0.03(   | 0.12%) |
|     |           | 65.485%  | C      | 4 s(  | 65.43%) | p       | 0.53(   | 34.56%) | d       | 0.00(  |
|     |           | 0.056%   | C      | 7 s(  | 8.72%)  | p10.43( | 90.89%) | d       | 0.04(   | 0.39%) |
|     |           | 0.040%   | C      | 9 s(  | 7.20%)  | p12.82( | 92.31%) | d       | 0.07(   | 0.49%) |
|     |           | 0.711%   | C      | 10 s( | 16.63%) | p       | 4.99(   | 82.99%) | d       | 0.02(  |
|     |           | 0.494%   | C      | 11 s( | 4.54%)  | p20.98( | 95.21%) | d       | 0.06(   | 0.26%) |
|     |           | 0.047%   | C      | 15 s( | 4.07%)  | p23.48( | 95.55%) | d       | 0.09(   | 0.38%) |
|     |           | 0.011%   | C      | 17 s( | 3.42%)  | p28.22( | 96.48%) | d       | 0.03(   | 0.11%) |
|     |           | 0.022%   | H      | 43 s( | 99.64%) | p       | 0.00(   | 0.36%)  |         |        |
|     |           | 0.070%   | O      | 44 s( | 66.04%) | p       | 0.34(   | 22.40%) | d       | 0.18(  |
|     |           | 0.039%   | O      | 47 s( | 45.38%) | p       | 1.19(   | 53.97%) | d       | 0.01(  |
|     |           | 0.134%   | O      | 48 s( | 1.82%)  | p52.98( | 96.58%) | d       | 0.88(   | 1.60%) |
|     |           | 0.106%   | Cl     | 49 s( | 14.85%) | p       | 5.68(   | 84.30%) | d       | 0.06(  |
|     |           | 0.265%   | N      | 50 s( | 8.05%)  | p11.31( | 91.11%) | d       | 0.10(   | 0.83%) |
|     |           | 32.386%  | Ru     | 52 s( | 15.25%) | p       | 0.01(   | 0.08%)  | d       | 5.55(  |
|     |           | 0.033%   | Ru     | 53 s( | 24.28%) | p       | 0.48(   | 11.62%) | d       | 2.64(  |
| 14. | (2.00000) | 98.9824% | BD (1) | C     | 5- C    | 7       |         |         |         |        |
|     |           | 0.161%   | C      | 3 s(  | 4.40%)  | p21.37( | 94.06%) | d       | 0.35(   | 1.54%) |
|     |           | 0.025%   | C      | 4 s(  | 21.40%) | p       | 3.67(   | 78.45%) | d       | 0.01(  |
|     |           | 49.262%  | C      | 5 s(  | 32.45%) | p       | 2.08(   | 67.46%) | d       | 0.00(  |
|     |           | 49.763%  | C      | 7 s(  | 33.71%) | p       | 1.96(   | 66.22%) | d       | 0.00(  |
|     |           | 0.139%   | C      | 9 s(  | 11.52%) | p       | 7.56(   | 87.12%) | d       | 0.12(  |
|     |           | 0.068%   | C      | 10 s( | 83.82%) | p       | 0.19(   | 16.09%) | d       | 0.00(  |
|     |           | 0.116%   | C      | 11 s( | 42.91%) | p       | 1.31(   | 56.38%) | d       | 0.02(  |
|     |           | 0.013%   | H      | 28 s( | 93.08%) | p       | 0.07(   | 6.92%)  |         |        |
|     |           | 0.155%   | H      | 41 s( | 99.39%) | p       | 0.01(   | 0.61%)  |         |        |
|     |           | 0.116%   | N      | 50 s( | 5.35%)  | p17.45( | 93.28%) | d       | 0.26(   | 1.37%) |
|     |           | 0.135%   | Ru     | 52 s( | 23.77%) | p       | 0.13(   | 3.04%)  | d       | 3.08(  |
| 15. | (2.00000) | 98.7123% | BD (1) | C     | 5- H    | 28      |         |         |         |        |
|     |           | 0.176%   | C      | 1 s(  | 37.21%) | p       | 1.67(   | 62.18%) | d       | 0.02(  |
|     |           | 0.028%   | C      | 2 s(  | 64.76%) | p       | 0.54(   | 35.02%) | d       | 0.00(  |
|     |           | 0.236%   | C      | 3 s(  | 5.22%)  | p17.89( | 93.42%) | d       | 0.26(   | 1.36%) |
|     |           | 60.354%  | C      | 5 s(  | 28.16%) | p       | 2.55(   | 71.77%) | d       | 0.00(  |
|     |           | 0.391%   | C      | 7 s(  | 10.94%) | p       | 8.04(   | 88.00%) | d       | 0.10(  |
|     |           | 0.026%   | C      | 9 s(  | 85.05%) | p       | 0.17(   | 14.39%) | d       | 0.01(  |
|     |           | 0.015%   | C      | 11 s( | 7.55%)  | p12.20( | 92.05%) | d       | 0.05(   | 0.40%) |
|     |           | 0.025%   | C      | 13 s( | 43.90%) | p       | 1.25(   | 54.80%) | d       | 0.03(  |
|     |           | 0.012%   | C      | 17 s( | 35.40%) | p       | 1.79(   | 63.52%) | d       | 0.03(  |
|     |           | 38.373%  | H      | 28 s( | 99.94%) | p       | 0.00(   | 0.06%)  |         |        |
|     |           | 0.016%   | H      | 30 s( | 87.75%) | p       | 0.14(   | 12.25%) |         |        |
|     |           | 0.064%   | H      | 41 s( | 99.45%) | p       | 0.01(   | 0.55%)  |         |        |
|     |           | 0.011%   | H      | 42 s( | 98.90%) | p       | 0.01(   | 1.10%)  |         |        |
|     |           | 0.234%   | N      | 50 s( | 30.90%) | p       | 2.22(   | 68.61%) | d       | 0.02(  |
|     |           | 0.011%   | Ru     | 52 s( | 14.12%) | p       | 0.11(   | 1.52%)  | d       | 5.97(  |
| 16. | (2.00000) | 99.8295% | BD (1) | C     | 6- O    | 45      |         |         |         |        |
|     |           | 25.129%  | C      | 6 s(  | 1.63%)  | p60.25( | 98.14%) | d       | 0.14(   | 0.23%) |
|     |           | 0.011%   | C      | 18 s( | 22.66%) | p       | 3.39(   | 76.79%) | d       | 0.02(  |
|     |           | 74.717%  | O      | 45 s( | 1.27%)  | p77.51( | 98.33%) | d       | 0.32(   |        |
|     |           | 0.078%   | Ru     | 53 s( | 1.77%)  | p11.04( | 19.59%) | d44.34( | 78.64%) |        |
| 17. | (2.00000) | 99.8049% | BD (2) | C     | 5- O    | 45      |         |         |         |        |
|     |           | 0.015%   | C      | 2 s(  | 10.73%) | p       | 8.24(   | 88.45%) | d       | 0.08(  |
|     |           | 25.338%  | C      | 6 s(  | 1.20%)  | p82.34( | 98.58%) | d       | 0.19(   |        |
|     |           | 0.012%   | C      | 8 s(  | 28.74%) | p       | 2.43(   | 69.81%) | d       | 0.05(  |
|     |           | 74.479%  | O      | 45 s( | 0.77%)  | p99.99( | 98.82%) | d       | 0.52(   |        |
|     |           | 0.015%   | N      | 51 s( | 3.72%)  | p25.86( | 96.17%) | d       | 0.03(   |        |
|     |           | 0.074%   | Ru     | 53 s( | 0.88%)  | p23.56( | 20.84%) | d88.47( | 78.27%) |        |
| 18. | (2.00000) | 99.7257% | BD (3) | C     | 6- O    | 45      |         |         |         |        |
|     |           | 0.010%   | C      | 2 s(  | 11.28%) | p       | 7.85(   | 88.48%) | d       | 0.02(  |
|     |           | 31.066%  | C      | 6 s(  | 38.03%) | p       | 1.63(   | 61.90%) | d       | 0.00(  |
|     |           | 0.023%   | C      | 8 s(  | 56.97%) | p       | 0.75(   | 42.84%) | d       | 0.00(  |
|     |           | 0.013%   | C      | 16 s( | 15.29%) | p       | 5.53(   | 84.60%) | d       | 0.01(  |
|     |           | 68.689%  | O      | 45 s( | 41.23%) | p       | 1.41(   | 58.01%) | d       | 0.02(  |
|     |           | 0.158%   | Ru     | 53 s( | 28.57%) | p       | 1.17(   | 33.52%) | d       | 1.33(  |
| 19. | (2.00000) | 96.2480% | BD (1) | C     | 6-Ru    | 53      |         |         |         |        |
|     |           | 0.023%   | C      | 2 s(  | 14.15%) | p       | 6.04(   | 85.42%) | d       | 0.03(  |

|     |            |          |         |    |        |           |   |       |           |   |       |           |
|-----|------------|----------|---------|----|--------|-----------|---|-------|-----------|---|-------|-----------|
|     |            |          | 65.355% | C  | 6 s    | ( 65.98%) | p | 0.52  | ( 34.01%) | d | 0.00  | ( 0.01%)  |
|     |            |          | 0.712%  | C  | 8 s    | ( 28.38%) | p | 2.51  | ( 71.35%) | d | 0.01  | ( 0.27%)  |
|     |            |          | 0.011%  | C  | 12 s   | ( 54.25%) | p | 0.83  | ( 44.96%) | d | 0.01  | ( 0.79%)  |
|     |            |          | 0.469%  | C  | 16 s   | ( 4.83%)  | p | 19.70 | ( 95.07%) | d | 0.02  | ( 0.11%)  |
|     |            |          | 0.042%  | C  | 18 s   | ( 40.19%) | p | 1.48  | ( 59.35%) | d | 0.01  | ( 0.46%)  |
|     |            |          | 0.010%  | C  | 20 s   | ( 15.98%) | p | 5.23  | ( 83.49%) | d | 0.03  | ( 0.53%)  |
|     |            |          | 0.085%  | C  | 22 s   | ( 24.99%) | p | 3.00  | ( 74.90%) | d | 0.00  | ( 0.11%)  |
|     |            |          | 0.026%  | C  | 24 s   | ( 34.59%) | p | 1.89  | ( 65.37%) | d | 0.00  | ( 0.05%)  |
|     |            |          | 0.083%  | O  | 45 s   | ( 68.32%) | p | 0.31  | ( 20.88%) | d | 0.16  | ( 10.80%) |
|     |            |          | 0.095%  | O  | 46 s   | ( 3.62%)  | p | 26.20 | ( 94.83%) | d | 0.43  | ( 1.55%)  |
|     |            |          | 0.165%  | O  | 47 s   | ( 14.71%) | p | 5.70  | ( 83.82%) | d | 0.10  | ( 1.46%)  |
|     |            |          | 0.154%  | Cl | 49 s   | ( 13.64%) | p | 6.27  | ( 85.51%) | d | 0.06  | ( 0.84%)  |
|     |            |          | 0.048%  | N  | 51 s   | ( 57.73%) | p | 0.72  | ( 41.61%) | d | 0.01  | ( 0.66%)  |
|     |            |          | 0.040%  | Ru | 52 s   | ( 44.48%) | p | 0.21  | ( 9.42%)  | d | 1.04  | ( 46.10%) |
|     |            |          | 32.615% | Ru | 53 s   | ( 17.40%) | p | 0.00  | ( 0.05%)  | d | 4.74  | ( 82.54%) |
| 20. | ( 2.00000) | 98.6202% | BD ( 1) | C  | 7 - C  | 9         |   |       |           |   |       |           |
|     |            |          | 0.015%  | C  | 1 s    | ( 73.79%) | p | 0.35  | ( 25.94%) | d | 0.00  | ( 0.27%)  |
|     |            |          | 0.218%  | C  | 2 s    | ( 33.36%) | p | 1.99  | ( 66.29%) | d | 0.01  | ( 0.35%)  |
|     |            |          | 0.092%  | C  | 3 s    | ( 34.72%) | p | 1.85  | ( 64.25%) | d | 0.03  | ( 1.03%)  |
|     |            |          | 0.148%  | C  | 5 s    | ( 4.60%)  | p | 20.32 | ( 93.49%) | d | 0.41  | ( 1.91%)  |
|     |            |          | 50.088% | C  | 7 s    | ( 32.68%) | p | 2.06  | ( 67.28%) | d | 0.00  | ( 0.05%)  |
|     |            |          | 48.568% | C  | 9 s    | ( 28.83%) | p | 2.47  | ( 71.10%) | d | 0.00  | ( 0.07%)  |
|     |            |          | 0.155%  | C  | 11 s   | ( 6.38%)  | p | 14.43 | ( 92.02%) | d | 0.25  | ( 1.60%)  |
|     |            |          | 0.147%  | C  | 13 s   | ( 2.90%)  | p | 32.95 | ( 95.46%) | d | 0.57  | ( 1.64%)  |
|     |            |          | 0.101%  | C  | 15 s   | ( 35.46%) | p | 1.80  | ( 63.86%) | d | 0.02  | ( 0.68%)  |
|     |            |          | 0.091%  | C  | 17 s   | ( 35.86%) | p | 1.76  | ( 63.23%) | d | 0.03  | ( 0.91%)  |
|     |            |          | 0.016%  | C  | 19 s   | ( 69.11%) | p | 0.44  | ( 30.57%) | d | 0.00  | ( 0.32%)  |
|     |            |          | 0.044%  | H  | 28 s   | ( 99.43%) | p | 0.01  | ( 0.57%)  |   |       |           |
|     |            |          | 0.045%  | H  | 30 s   | ( 99.71%) | p | 0.00  | ( 0.29%)  |   |       |           |
|     |            |          | 0.197%  | N  | 50 s   | ( 15.46%) | p | 5.36  | ( 82.80%) | d | 0.11  | ( 1.74%)  |
|     |            |          | 0.023%  | Ru | 52 s   | ( 45.29%) | p | 0.38  | ( 17.41%) | d | 0.82  | ( 37.30%) |
| 21. | ( 2.00000) | 99.0942% | BD ( 1) | C  | 7 - N  | 50        |   |       |           |   |       |           |
|     |            |          | 0.160%  | C  | 2 s    | ( 6.83%)  | p | 13.37 | ( 91.29%) | d | 0.27  | ( 1.88%)  |
|     |            |          | 0.086%  | C  | 5 s    | ( 7.71%)  | p | 11.66 | ( 89.85%) | d | 0.32  | ( 2.45%)  |
|     |            |          | 40.468% | C  | 7 s    | ( 28.76%) | p | 2.47  | ( 71.17%) | d | 0.00  | ( 0.07%)  |
|     |            |          | 0.103%  | C  | 9 s    | ( 8.60%)  | p | 10.43 | ( 89.73%) | d | 0.19  | ( 1.66%)  |
|     |            |          | 0.023%  | C  | 10 s   | ( 5.46%)  | p | 17.18 | ( 93.72%) | d | 0.15  | ( 0.82%)  |
|     |            |          | 0.035%  | C  | 11 s   | ( 64.39%) | p | 0.54  | ( 34.85%) | d | 0.01  | ( 0.76%)  |
|     |            |          | 0.057%  | C  | 13 s   | ( 22.41%) | p | 3.45  | ( 77.21%) | d | 0.02  | ( 0.38%)  |
|     |            |          | 0.150%  | H  | 27 s   | ( 99.93%) | p | 0.00  | ( 0.07%)  |   |       |           |
|     |            |          | 0.106%  | H  | 28 s   | ( 99.18%) | p | 0.01  | ( 0.82%)  |   |       |           |
|     |            |          | 58.637% | N  | 50 s   | ( 33.93%) | p | 1.94  | ( 65.89%) | d | 0.01  | ( 0.18%)  |
|     |            |          | 0.115%  | Ru | 52 s   | ( 25.94%) | p | 0.78  | ( 20.27%) | d | 2.07  | ( 53.78%) |
| 22. | ( 2.00000) | 85.5208% | BD ( 2) | C  | 7 - N  | 50        |   |       |           |   |       |           |
|     |            |          | 2.062%  | C  | 1 s    | ( 0.01%)  | p | 1.00  | ( 99.82%) | d | 0.00  | ( 0.18%)  |
|     |            |          | 6.392%  | C  | 2 s    | ( 0.01%)  | p | 1.00  | ( 99.46%) | d | 0.01  | ( 0.53%)  |
|     |            |          | 2.162%  | C  | 3 s    | ( 0.00%)  | p | 1.00  | ( 99.86%) | d | 0.00  | ( 0.14%)  |
|     |            |          | 0.023%  | C  | 4 s    | ( 19.94%) | p | 3.92  | ( 78.09%) | d | 0.10  | ( 1.97%)  |
|     |            |          | 2.257%  | C  | 5 s    | ( 0.00%)  | p | 1.00  | ( 99.53%) | d | 0.00  | ( 0.47%)  |
|     |            |          | 0.018%  | C  | 6 s    | ( 10.21%) | p | 8.78  | ( 89.62%) | d | 0.02  | ( 0.18%)  |
|     |            |          | 27.686% | C  | 7 s    | ( 0.00%)  | p | 1.00  | ( 99.91%) | d | 0.00  | ( 0.09%)  |
|     |            |          | 0.615%  | C  | 9 s    | ( 0.02%)  | p | 99.99 | ( 98.66%) | d | 61.68 | ( 1.32%)  |
|     |            |          | 0.118%  | C  | 10 s   | ( 0.17%)  | p | 99.99 | ( 99.39%) | d | 2.60  | ( 0.44%)  |
|     |            |          | 0.175%  | C  | 11 s   | ( 0.52%)  | p | 99.99 | ( 98.62%) | d | 1.67  | ( 0.86%)  |
|     |            |          | 0.231%  | C  | 13 s   | ( 0.03%)  | p | 99.99 | ( 99.84%) | d | 4.41  | ( 0.13%)  |
|     |            |          | 0.034%  | C  | 15 s   | ( 0.20%)  | p | 99.99 | ( 97.84%) | d | 9.96  | ( 1.97%)  |
|     |            |          | 0.121%  | C  | 19 s   | ( 0.04%)  | p | 99.99 | ( 99.88%) | d | 1.97  | ( 0.08%)  |
|     |            |          | 0.041%  | O  | 48 s   | ( 0.03%)  | p | 99.99 | ( 99.92%) | d | 1.84  | ( 0.05%)  |
|     |            |          | 57.879% | N  | 50 s   | ( 0.00%)  | p | 1.00  | ( 99.91%) | d | 0.00  | ( 0.09%)  |
|     |            |          | 0.133%  | Ru | 52 s   | ( 0.97%)  | p | 22.46 | ( 21.86%) | d | 79.29 | ( 77.17%) |
|     |            |          | 0.017%  | Ru | 53 s   | ( 28.71%) | p | 0.46  | ( 13.25%) | d | 2.02  | ( 58.04%) |
| 23. | ( 2.00000) | 99.8714% | BD ( 1) | C  | 8 - O  | 46        |   |       |           |   |       |           |
|     |            |          | 25.170% | C  | 8 s    | ( 0.05%)  | p | 99.99 | ( 99.72%) | d | 4.71  | ( 0.23%)  |
|     |            |          | 0.011%  | C  | 16 s   | ( 18.47%) | p | 4.40  | ( 81.21%) | d | 0.02  | ( 0.32%)  |
|     |            |          | 74.704% | O  | 46 s   | ( 0.03%)  | p | 99.99 | ( 99.58%) | d | 14.79 | ( 0.39%)  |
|     |            |          | 0.076%  | Ru | 53 s   | ( 0.33%)  | p | 68.98 | ( 22.53%) | d | 99.99 | ( 77.14%) |
| 24. | ( 2.00000) | 99.8725% | BD ( 2) | C  | 8 - O  | 46        |   |       |           |   |       |           |
|     |            |          | 0.015%  | C  | 6 s    | ( 24.25%) | p | 3.08  | ( 74.70%) | d | 0.04  | ( 1.06%)  |
|     |            |          | 25.543% | C  | 8 s    | ( 0.00%)  | p | 1.00  | ( 99.77%) | d | 0.00  | ( 0.22%)  |
|     |            |          | 74.330% | O  | 46 s   | ( 0.01%)  | p | 1.00  | ( 99.60%) | d | 0.00  | ( 0.39%)  |
|     |            |          | 0.070%  | Ru | 53 s   | ( 0.08%)  | p | 99.99 | ( 22.88%) | d | 99.99 | ( 77.04%) |
| 25. | ( 2.00000) | 99.7643% | BD ( 3) | C  | 8 - O  | 46        |   |       |           |   |       |           |
|     |            |          | 0.021%  | C  | 6 s    | ( 57.72%) | p | 0.73  | ( 41.89%) | d | 0.01  | ( 0.39%)  |
|     |            |          | 31.722% | C  | 8 s    | ( 39.96%) | p | 1.50  | ( 59.98%) | d | 0.00  | ( 0.06%)  |
|     |            |          | 0.014%  | C  | 16 s   | ( 14.85%) | p | 5.72  | ( 84.99%) | d | 0.01  | ( 0.16%)  |
|     |            |          | 68.049% | O  | 46 s   | ( 43.13%) | p | 1.30  | ( 56.09%) | d | 0.02  | ( 0.78%)  |
|     |            |          | 0.166%  | Ru | 53 s   | ( 29.31%) | p | 1.21  | ( 35.38%) | d | 1.20  | ( 35.31%) |
| 26. | ( 2.00000) | 96.2625% | BD ( 1) | C  | 8 - Ru | 53        |   |       |           |   |       |           |
|     |            |          | 0.678%  | C  | 6 s    | ( 19.31%) | p | 4.16  | ( 80.32%) | d | 0.02  | ( 0.37%)  |
|     |            |          | 65.534% | C  | 8 s    | ( 65.46%) | p | 0.53  | ( 34.53%) | d | 0.00  | ( 0.01%)  |
|     |            |          | 0.048%  | C  | 12 s   | ( 7.49%)  | p | 12.28 | ( 91.95%) | d | 0.08  | ( 0.57%)  |
|     |            |          | 0.483%  | C  | 16 s   | ( 4.48%)  | p | 21.29 | ( 95.28%) | d | 0.06  | ( 0.25%)  |
|     |            |          | 0.047%  | C  | 18 s   | ( 4.62%)  | p | 20.59 | ( 95.04%) | d | 0.07  | ( 0.34%)  |
|     |            |          | 0.058%  | C  | 20 s   | ( 8.29%)  | p | 11.01 | ( 91.31%) | d | 0.05  | ( 0.40%)  |
|     |            |          | 0.014%  | C  | 21 s   | ( 2.87%)  | p | 33.78 | ( 97.02%) | d | 0.04  | ( 0.10%)  |
|     |            |          | 0.038%  | C  | 22 s   | ( 7.03%)  | p | 13.15 | ( 92.45%) | d | 0.07  | ( 0.52%)  |
|     |            |          | 0.010%  | C  | 26 s   | ( 3.79%)  | p | 25.37 | ( 96.10%) | d | 0.03  | ( 0.11%)  |
|     |            |          | 0.018%  | H  | 43 s   | ( 99.47%) | p | 0.01  | ( 0.53%)  |   |       |           |
|     |            |          | 0.117%  | O  | 45 s   | ( 2.01%)  | p | 47.81 | ( 96.21%) | d | 0.88  | ( 1.78%)  |
|     |            |          | 0.070%  | O  | 46 s   | ( 65.69%) | p | 0.35  | ( 22.72%) | d | 0.18  | ( 11.58%) |
|     |            |          | 0.040%  | O  | 47 s   | ( 48.80%) | p | 1.04  | ( 50.76%) | d | 0.01  | ( 0.44%)  |
|     |            |          | 0.107%  | Cl | 49 s   | ( 14.04%) | p | 6.06  | ( 85.15%) | d | 0.06  | ( 0.81%)  |
|     |            |          | 0.265%  | N  | 51 s   | ( 8.22%)  | p | 11.04 | ( 90.80%) | d | 0.12  | ( 0.97%)  |
|     |            |          | 0.031%  | Ru | 52 s   | ( 23.63%) | p | 0.54  | ( 12.85%) | d | 2.69  | ( 63.52%) |
|     |            |          | 32.390% | Ru | 53 s   | ( 15.39%) | p | 0.01  | ( 0.08%)  | d | 5.49  | ( 84.53%) |
| 27. | ( 2.00000) | 98.5820% | BD ( 1) | C  | 9 - C  | 11        |   |       |           |   |       |           |
|     |            |          | 0.019%  | C  | 2 s    | ( 30.76%) | p | 2.24  | ( 68.84%) | d | 0.01  | ( 0.40%)  |
|     |            |          | 0.011%  | C  | 4 s    | ( 34.28%) | p | 1.90  | ( 65.09%) | d | 0.02  | ( 0.63%)  |
|     |            |          | 0.113%  | C  | 5 s    | ( 26.14%) | p | 2.80  | ( 73.10%) | d | 0.03  | ( 0.76%)  |
|     |            |          | 0.196%  | C  | 7 s    | ( 4.11%)  | p | 22.79 | ( 93.74%) | d | 0.52  | ( 2.15%)  |
|     |            |          | 52.679% | C  | 9 s    | ( 32.03%) | p | 2.12  | ( 67.91%) | d | 0.00  | ( 0.06%)  |
|     |            |          | 9.062%  | C  | 10 s   | ( 23.59%) | p | 3.23  | ( 76.25%) | d | 0.01  | ( 0.16%)  |
|     |            |          | 45.951% | C  | 11 s   | ( 35.10%) | p | 1.85  | ( 64.80%) | d | 0.00  | ( 0.10%)  |
|     |            |          | 0.170%  | C  | 13 s   | ( 1.40%)  | p | 69.10 | ( 96.77%) | d | 1.31  | ( 1.83%)  |
|     |            |          | 0.173%  | C  | 15 s   | ( 7.98%)  | p | 11.37 | ( 90.74%) | d | 0.16  | ( 1.28%)  |
|     |            |          | 0.015%  | H  | 28 s   | ( 99.52%) | p |       |           |   |       |           |

|     |           |          |         |                    |                 |                 |
|-----|-----------|----------|---------|--------------------|-----------------|-----------------|
|     |           |          | 0.264%  | C 11 s( 3.69%)     | p25.78( 95.24%) | d 0.29( 1.06%)  |
|     |           |          | 48.484% | C 13 s( 33.13%)    | p 2.02( 66.79%) | d 0.00( 0.08%)  |
|     |           |          | 0.162%  | C 17 s( 4.44%)     | p21.18( 94.02%) | d 0.35( 1.54%)  |
|     |           |          | 0.015%  | C 19 s( 63.12%)    | p 0.56( 35.23%) | d 0.03( 1.64%)  |
|     |           |          | 0.011%  | H 30 s( 87.01%)    | p 0.15( 12.99%) |                 |
|     |           |          | 0.150%  | H 34 s( 99.36%)    | p 0.01( 0.64%)  |                 |
|     |           |          | 0.038%  | Cl 49 s( 14.69%)   | p 5.76( 84.68%) | d 0.04( 0.63%)  |
|     |           |          | 0.116%  | N 50 s( 58.26%)    | p 0.69( 40.37%) | d 0.02( 1.37%)  |
|     |           |          | 0.206%  | Ru 52 s( 16.11%)   | p 0.08( 1.34%)  | d 5.12( 82.55%) |
| 29. | (2.00000) | 81.1519% |         | BD ( 2) C 9- C 13  |                 |                 |
|     |           |          | 0.616%  | C 1 s( 0.00%)      | p 1.00( 99.96%) | d 0.00( 0.04%)  |
|     |           |          | 0.204%  | C 3 s( 0.00%)      | p 1.00( 99.04%) | d 0.01( 0.96%)  |
|     |           |          | 0.015%  | C 4 s( 1.76%)      | p55.22( 97.24%) | d 0.57( 1.00%)  |
|     |           |          | 0.551%  | C 5 s( 0.01%)      | p 1.00( 99.49%) | d 0.01( 0.50%)  |
|     |           |          | 2.305%  | C 7 s( 0.00%)      | p 1.00( 99.04%) | d 0.01( 0.96%)  |
|     |           |          | 43.006% | C 9 s( 0.00%)      | p 1.00( 99.99%) | d 0.00( 0.01%)  |
|     |           |          | 5.973%  | C 11 s( 0.00%)     | p 1.00( 99.71%) | d 0.00( 0.29%)  |
|     |           |          | 38.149% | C 13 s( 0.00%)     | p 1.00( 99.97%) | d 0.00( 0.03%)  |
|     |           |          | 1.149%  | C 15 s( 0.00%)     | p 1.00( 99.56%) | d 0.00( 0.44%)  |
|     |           |          | 5.303%  | C 17 s( 0.00%)     | p 1.00( 99.71%) | d 0.00( 0.29%)  |
|     |           |          | 1.727%  | C 19 s( 0.00%)     | p 1.00( 99.73%) | d 0.00( 0.27%)  |
|     |           |          | 0.014%  | H 30 s( 0.06%)     | p99.99( 99.94%) |                 |
|     |           |          | 0.921%  | N 50 s( 0.00%)     | p 1.00( 99.60%) | d 0.00( 0.39%)  |
|     |           |          | 0.022%  | Ru 52 s( 0.56%)    | p29.43( 16.50%) | d99.99( 82.94%) |
| 30. | (2.00000) | 99.8088% |         | BD ( 1) C 10- O 48 |                 |                 |
|     |           |          | 0.012%  | C 4 s( 9.62%)      | p 9.26( 89.16%) | d 0.13( 1.22%)  |
|     |           |          | 25.351% | C 10 s( 2.32%)     | p42.03( 97.46%) | d 0.10( 0.22%)  |
|     |           |          | 74.480% | O 48 s( 1.85%)     | p52.86( 97.74%) | d 0.22( 0.41%)  |
|     |           |          | 0.010%  | N 50 s( 6.50%)     | p14.30( 93.00%) | d 0.08( 0.50%)  |
|     |           |          | 0.083%  | Ru 52 s( 1.86%)    | p11.12( 20.64%) | d41.74( 77.50%) |
| 31. | (2.00000) | 99.7877% |         | BD ( 2) C 10- O 48 |                 |                 |
|     |           |          | 0.011%  | C 4 s( 29.62%)     | p 2.34( 69.25%) | d 0.04( 1.13%)  |
|     |           |          | 25.144% | C 10 s( 0.93%)     | p99.99( 98.84%) | d 0.24( 0.23%)  |
|     |           |          | 0.023%  | C 12 s( 11.72%)    | p 7.44( 87.19%) | d 0.09( 1.09%)  |
|     |           |          | 74.655% | O 48 s( 0.60%)     | p99.99( 99.00%) | d 0.66( 0.40%)  |
|     |           |          | 0.013%  | N 50 s( 5.08%)     | p18.65( 94.73%) | d 0.04( 0.19%)  |
|     |           |          | 0.012%  | N 51 s( 4.67%)     | p20.28( 94.78%) | d 0.12( 0.55%)  |
|     |           |          | 0.070%  | Ru 52 s( 0.74%)    | p28.32( 21.01%) | d99.99( 78.25%) |
| 32. | (2.00000) | 99.7178% |         | BD ( 3) C 10- O 48 |                 |                 |
|     |           |          | 0.022%  | C 4 s( 53.78%)     | p 0.86( 46.04%) | d 0.00( 0.18%)  |
|     |           |          | 30.976% | C 10 s( 37.61%)    | p 1.66( 62.32%) | d 0.00( 0.07%)  |
|     |           |          | 0.014%  | C 11 s( 14.49%)    | p 5.89( 85.39%) | d 0.01( 0.12%)  |
|     |           |          | 0.013%  | C 12 s( 13.49%)    | p 6.39( 86.24%) | d 0.02( 0.27%)  |
|     |           |          | 68.773% | O 48 s( 40.90%)    | p 1.43( 58.35%) | d 0.02( 0.75%)  |
|     |           |          | 0.156%  | Ru 52 s( 28.37%)   | p 1.18( 33.49%) | d 1.34( 38.15%) |
| 33. | (2.00000) | 96.2795% |         | BD ( 1) C 10-Ru 52 |                 |                 |
|     |           |          | 0.011%  | C 2 s( 57.02%)     | p 0.74( 42.24%) | d 0.01( 0.74%)  |
|     |           |          | 0.686%  | C 4 s( 27.23%)     | p 2.66( 72.49%) | d 0.01( 0.27%)  |
|     |           |          | 0.011%  | C 7 s( 15.60%)     | p 5.38( 83.91%) | d 0.03( 0.49%)  |
|     |           |          | 0.087%  | C 9 s( 23.72%)     | p 3.21( 76.19%) | d 0.00( 0.09%)  |
|     |           |          | 65.533% | C 10 s( 66.10%)    | p 0.51( 33.90%) | d 0.00( 0.01%)  |
|     |           |          | 0.508%  | C 11 s( 5.30%)     | p17.84( 94.60%) | d 0.02( 0.10%)  |
|     |           |          | 0.027%  | C 12 s( 14.34%)    | p 5.93( 85.07%) | d 0.04( 0.59%)  |
|     |           |          | 0.043%  | C 15 s( 38.94%)    | p 1.56( 60.58%) | d 0.01( 0.48%)  |
|     |           |          | 0.027%  | C 19 s( 33.77%)    | p 1.96( 66.19%) | d 0.00( 0.04%)  |
|     |           |          | 0.011%  | H 43 s( 99.54%)    | p 0.00( 0.46%)  |                 |
|     |           |          | 0.093%  | O 44 s( 3.77%)     | p25.09( 94.63%) | d 0.42( 1.60%)  |
|     |           |          | 0.162%  | O 47 s( 27.37%)    | p 2.58( 70.64%) | d 0.07( 2.00%)  |
|     |           |          | 0.084%  | O 48 s( 68.27%)    | p 0.30( 20.77%) | d 0.16( 10.96%) |
|     |           |          | 0.138%  | Cl 49 s( 12.93%)   | p 6.65( 86.08%) | d 0.08( 0.99%)  |
|     |           |          | 0.050%  | N 50 s( 56.70%)    | p 0.75( 42.61%) | d 0.01( 0.69%)  |
|     |           |          | 32.437% | Ru 52 s( 17.77%)   | p 0.00( 0.05%)  | d 4.63( 82.18%) |
|     |           |          | 0.033%  | Ru 53 s( 43.85%)   | p 0.26( 11.62%) | d 1.02( 44.54%) |
| 34. | (2.00000) | 98.9969% |         | BD ( 1) C 11- C 15 |                 |                 |
|     |           |          | 0.020%  | C 4 s( 58.23%)     | p 0.71( 41.61%) | d 0.00( 0.16%)  |
|     |           |          | 0.157%  | C 7 s( 33.39%)     | p 1.98( 66.18%) | d 0.01( 0.43%)  |
|     |           |          | 0.222%  | C 9 s( 10.47%)     | p 8.43( 88.31%) | d 0.12( 1.22%)  |
|     |           |          | 0.047%  | C 10 s( 41.94%)    | p 1.38( 57.83%) | d 0.01( 0.23%)  |
|     |           |          | 47.632% | C 11 s( 37.19%)    | p 1.69( 62.71%) | d 0.00( 0.09%)  |
|     |           |          | 51.394% | C 15 s( 34.49%)    | p 1.90( 65.42%) | d 0.00( 0.09%)  |
|     |           |          | 0.144%  | C 19 s( 2.13%)     | p45.23( 96.37%) | d 0.70( 1.50%)  |
|     |           |          | 0.027%  | H 33 s( 93.39%)    | p 0.07( 6.61%)  |                 |
|     |           |          | 0.146%  | H 35 s( 99.09%)    | p 0.01( 0.91%)  |                 |
|     |           |          | 0.012%  | N 50 s( 19.42%)    | p 4.08( 79.19%) | d 0.07( 1.38%)  |
|     |           |          | 0.135%  | Ru 52 s( 24.88%)   | p 1.30( 32.46%) | d 1.71( 42.66%) |
| 35. | (2.00000) | 78.0796% |         | BD ( 2) C 11- C 15 |                 |                 |
|     |           |          | 0.044%  | C 1 s( 0.05%)      | p99.99( 99.92%) | d 0.79( 0.04%)  |
|     |           |          | 0.013%  | C 2 s( 0.92%)      | p99.99( 96.46%) | d 2.87( 2.63%)  |
|     |           |          | 0.062%  | C 4 s( 11.02%)     | p 7.99( 87.97%) | d 0.09( 1.02%)  |
|     |           |          | 0.096%  | C 5 s( 0.09%)      | p99.99( 99.91%) | d 0.02( 0.00%)  |
|     |           |          | 0.176%  | C 7 s( 0.09%)      | p99.99( 98.62%) | d13.67( 1.29%)  |
|     |           |          | 4.514%  | C 9 s( 0.00%)      | p 1.00( 99.61%) | d 0.00( 0.39%)  |
|     |           |          | 0.036%  | C 10 s( 11.31%)    | p 7.75( 87.63%) | d 0.09( 1.06%)  |
|     |           |          | 35.499% | C 11 s( 0.01%)     | p 1.00( 99.94%) | d 0.00( 0.05%)  |
|     |           |          | 5.766%  | C 13 s( 0.00%)     | p 1.00( 99.91%) | d 0.00( 0.09%)  |
|     |           |          | 42.585% | C 15 s( 0.00%)     | p 1.00( 99.97%) | d 0.00( 0.02%)  |
|     |           |          | 5.086%  | C 17 s( 0.00%)     | p 1.00( 99.88%) | d 0.00( 0.11%)  |
|     |           |          | 5.860%  | C 19 s( 0.00%)     | p 1.00( 99.66%) | d 0.00( 0.34%)  |
|     |           |          | 0.012%  | H 30 s( 0.28%)     | p99.99( 99.72%) |                 |
|     |           |          | 0.012%  | H 33 s( 0.90%)     | p99.99( 99.10%) |                 |
|     |           |          | 0.013%  | H 34 s( 0.03%)     | p99.99( 99.97%) |                 |
|     |           |          | 0.014%  | O 44 s( 4.68%)     | p20.10( 94.05%) | d 0.27( 1.27%)  |
|     |           |          | 0.010%  | O 48 s( 0.47%)     | p99.99( 96.14%) | d 7.19( 3.39%)  |
|     |           |          | 0.039%  | N 50 s( 3.51%)     | p26.44( 92.77%) | d 1.06( 3.73%)  |
|     |           |          | 0.092%  | Ru 52 s( 1.13%)    | p16.87( 19.10%) | d70.47( 79.77%) |
|     |           |          | 0.024%  | Ru 53 s( 8.03%)    | p 0.39( 3.16%)  | d11.06( 88.81%) |
| 36. | (2.00000) | 93.0234% |         | BD ( 1) C 11-Ru 52 |                 |                 |
|     |           |          | 0.059%  | C 2 s( 41.26%)     | p 1.42( 58.41%) | d 0.01( 0.33%)  |
|     |           |          | 0.842%  | C 4 s( 33.41%)     | p 1.98( 66.27%) | d 0.01( 0.32%)  |
|     |           |          | 0.042%  | C 5 s( 29.10%)     | p 2.43( 70.77%) | d 0.00( 0.13%)  |
|     |           |          | 0.117%  | C 7 s( 74.29%)     | p 0.34( 25.49%) | d 0.00( 0.22%)  |
|     |           |          | 0.415%  | C 9 s( 18.51%)     | p 4.31( 79.77%) | d 0.09( 1.72%)  |
|     |           |          | 0.950%  | C 10 s( 36.74%)    | p 1.72( 63.03%) | d 0.01( 0.23%)  |
|     |           |          | 54.567% | C 11 s( 28.68%)    | p 2.49( 71.31%) | d 0.00( 0.01%)  |
|     |           |          | 0.342%  | C 13 s( 38.16%)    | p 1.61( 61.31%) | d 0.01( 0.52%)  |
|     |           |          | 0.408%  | C 15 s( 11.33%)    | p 7.68( 87.03%) | d 0.14( 1.64%)  |
|     |           |          | 0.046%  | C 17 s( 59.20%)    | p 0.68( 40.28%) | d 0.01( 0.52%)  |
|     |           |          | 0.304%  | C 19 s( 43.16%)    | p 1.30( 56.29%) | d 0.01( 0.55%)  |
|     |           |          | 0.029%  | H 30 s( 98.21%)    | p 0.02( 1.79%)  |                 |
|     |           |          | 0.127%  | H 33 s( 99.57%)    | p 0.00( 0.43%)  |                 |
|     |           |          | 0.021%  | H 35 s( 98.01%)    | p 0.02( 1.99%)  |                 |
|     |           |          | 0.133%  | O 44 s( 0.68%)     | p99.99( 98.39%) | d 1.37( 0.93%)  |
|     |           |          | 0.242%  | O 47 s( 21.62%)    | p 3.59( 77.67%) | d 0.03( 0.70%)  |
|     |           |          | 0.137%  | O 48 s( 1.19%)     | p82.54( 98.00%) | d 0.69( 0.82%)  |
|     |           |          | 0.043%  | Cl 49 s( 18.67%)   | p 2.22( 41.53%) | d 2.13( 39.80%) |
|     |           |          | 0.310%  | N 50 s( 14.87%)    | p 5.68( 84.55%) | d 0.04( 0.58%)  |

|                                                      |          |                                                        |          |                                                      |
|------------------------------------------------------|----------|--------------------------------------------------------|----------|------------------------------------------------------|
| 37. (2.00000)                                        | 99.1632% | 40.771% Ru 52 s( 10.69%)p 0.00( 0.03%)d 8.35( 89.28%)  |          |                                                      |
|                                                      |          | 0.051% Ru 53 s( 1.17%)p 5.50( 6.44%)d 78.86( 92.39%)   |          |                                                      |
|                                                      |          | BD ( 1) C 12- C 14                                     |          |                                                      |
|                                                      |          | 0.076% C 6 s( 81.72%)p 0.22( 18.20%)d 0.00( 0.08%)     |          |                                                      |
|                                                      |          | 0.022% C 8 s( 21.34%)p 3.68( 78.52%)d 0.01( 0.14%)     |          |                                                      |
|                                                      |          | 49.390% C 12 s( 35.99%)p 1.78( 63.92%)d 0.00( 0.09%)   |          |                                                      |
|                                                      |          | 49.802% C 14 s( 32.93%)p 2.03( 66.98%)d 0.00( 0.09%)   |          |                                                      |
|                                                      |          | 0.018% C 16 s( 21.01%)p 3.75( 78.88%)d 0.01( 0.11%)    |          |                                                      |
|                                                      |          | 0.011% C 20 s( 66.18%)p 0.50( 33.01%)d 0.01( 0.81%)    |          |                                                      |
|                                                      |          | 0.155% C 21 s( 4.42%)p 21.26( 93.87%)d 0.39( 1.71%)    |          |                                                      |
|                                                      |          | 0.011% H 29 s( 78.77%)p 0.27( 21.23%)                  |          |                                                      |
|                                                      |          | 0.015% H 31 s( 89.99%)p 0.11( 10.01%)                  |          |                                                      |
|                                                      |          | 0.162% H 37 s( 99.50%)p 0.01( 0.50%)                   |          |                                                      |
|                                                      |          | 0.146% N 51 s( 3.81%)p 24.98( 95.31%)d 0.23( 0.87%)    |          |                                                      |
|                                                      |          | 0.147% Ru 53 s( 14.44%)p 0.29( 4.15%)d 5.64( 81.41%)   |          |                                                      |
| 38. (2.00000)                                        | 80.4566% | BD ( 2) C 12- C 14                                     |          |                                                      |
|                                                      |          | 35.969% C 12 s( 0.00%)p 1.00( 99.95%)d 0.00( 0.04%)    |          |                                                      |
|                                                      |          | 44.503% C 14 s( 0.00%)p 1.00( 99.97%)d 0.00( 0.03%)    |          |                                                      |
|                                                      |          | 0.115% C 16 s( 0.00%)p 1.00( 99.78%)d 0.00( 0.22%)     |          |                                                      |
|                                                      |          | 0.010% C 18 s( 0.02%)p 99.99( 97.91%)d 97.19( 2.07%)   |          |                                                      |
|                                                      |          | 4.928% C 20 s( 0.00%)p 1.00( 99.93%)d 0.00( 0.07%)     |          |                                                      |
|                                                      |          | 8.817% C 21 s( 0.00%)p 1.00( 99.79%)d 0.00( 0.21%)     |          |                                                      |
|                                                      |          | 0.296% C 22 s( 0.01%)p 99.99( 98.39%)d 99.99( 1.60%)   |          |                                                      |
|                                                      |          | 2.049% C 23 s( 0.00%)p 1.00( 99.65%)d 0.00( 0.35%)     |          |                                                      |
|                                                      |          | 0.098% C 24 s( 0.00%)p 1.00( 99.93%)d 0.00( 0.07%)     |          |                                                      |
|                                                      |          | 0.107% C 25 s( 0.04%)p 99.99( 99.60%)d 10.23( 0.37%)   |          |                                                      |
|                                                      |          | 0.014% H 31 s( 0.34%)p 99.99( 99.66%)                  |          |                                                      |
|                                                      |          | 3.036% N 51 s( 0.00%)p 1.00( 99.36%)d 0.01( 0.64%)     |          |                                                      |
|                                                      |          | 0.015% Ru 53 s( 1.49%)p 17.66( 26.35%)d 48.37( 72.16%) |          |                                                      |
|                                                      |          | 39. (2.00000)                                          | 98.6865% | BD ( 1) C 12- H 29                                   |
| 0.011% C 6 s( 41.34%)p 1.40( 57.93%)d 0.02( 0.73%)   |          |                                                        |          |                                                      |
| 0.012% C 10 s( 1.71%)p 56.87( 97.33%)d 0.56( 0.96%)  |          |                                                        |          |                                                      |
| 61.474% C 12 s( 29.87%)p 2.35( 70.07%)d 0.00( 0.06%) |          |                                                        |          |                                                      |
| 0.220% C 14 s( 8.61%)p 10.43( 89.86%)d 0.18( 1.52%)  |          |                                                        |          |                                                      |
| 0.385% C 20 s( 26.09%)p 2.83( 73.71%)d 0.01( 0.20%)  |          |                                                        |          |                                                      |
| 0.169% C 21 s( 35.33%)p 1.81( 64.02%)d 0.02( 0.65%)  |          |                                                        |          |                                                      |
| 0.023% C 23 s( 53.00%)p 0.88( 46.73%)d 0.01( 0.27%)  |          |                                                        |          |                                                      |
| 37.218% H 29 s( 99.89%)p 0.00( 0.11%)                |          |                                                        |          |                                                      |
| 0.050% H 31 s( 99.44%)p 0.01( 0.56%)                 |          |                                                        |          |                                                      |
| 0.013% H 37 s( 98.06%)p 0.02( 1.94%)                 |          |                                                        |          |                                                      |
| 0.347% N 51 s( 16.54%)p 4.97( 82.14%)d 0.08( 1.32%)  |          |                                                        |          |                                                      |
| 0.019% Ru 53 s( 7.14%)p 3.21( 22.90%)d 9.80( 69.96%) |          |                                                        |          |                                                      |
| 40. (2.00000)                                        | 99.3178% |                                                        |          | BD ( 1) C 12- N 51                                   |
|                                                      |          |                                                        |          | 0.017% C 6 s( 11.96%)p 7.30( 87.31%)d 0.06( 0.74%)   |
|                                                      |          | 0.010% C 8 s( 28.65%)p 2.48( 70.95%)d 0.01( 0.40%)     |          |                                                      |
|                                                      |          | 39.687% C 12 s( 30.77%)p 2.25( 69.14%)d 0.00( 0.09%)   |          |                                                      |
|                                                      |          | 0.080% C 14 s( 6.31%)p 14.56( 91.80%)d 0.30( 1.90%)    |          |                                                      |
|                                                      |          | 0.011% C 16 s( 27.77%)p 2.56( 71.17%)d 0.04( 1.06%)    |          |                                                      |
|                                                      |          | 0.183% C 20 s( 9.34%)p 9.49( 88.63%)d 0.22( 2.03%)     |          |                                                      |
|                                                      |          | 0.119% C 22 s( 30.46%)p 2.26( 68.88%)d 0.02( 0.65%)    |          |                                                      |
|                                                      |          | 0.016% H 29 s( 95.59%)p 0.05( 4.41%)                   |          |                                                      |
|                                                      |          | 0.090% H 31 s( 99.19%)p 0.01( 0.81%)                   |          |                                                      |
|                                                      |          | 59.637% N 51 s( 35.27%)p 1.83( 64.56%)d 0.00( 0.17%)   |          |                                                      |
|                                                      |          | 0.099% Ru 53 s( 6.92%)p 3.65( 25.21%)d 9.82( 67.88%)   |          |                                                      |
|                                                      |          | 41. (2.00000)                                          | 99.1624% | BD ( 1) C 13- C 17                                   |
|                                                      |          |                                                        |          | 0.150% C 7 s( 39.97%)p 1.49( 59.55%)d 0.01( 0.48%)   |
|                                                      |          |                                                        |          | 0.233% C 9 s( 4.41%)p 21.38( 94.37%)d 0.27( 1.21%)   |
| 0.018% C 11 s( 30.98%)p 2.22( 68.68%)d 0.01( 0.34%)  |          |                                                        |          |                                                      |
| 49.976% C 13 s( 34.04%)p 1.94( 65.88%)d 0.00( 0.09%) |          |                                                        |          |                                                      |
| 0.011% C 15 s( 61.98%)p 0.58( 36.06%)d 0.03( 1.96%)  |          |                                                        |          |                                                      |
| 49.234% C 17 s( 33.57%)p 1.98( 66.34%)d 0.00( 0.09%) |          |                                                        |          |                                                      |
| 0.153% C 19 s( 2.87%)p 33.29( 95.57%)d 0.54( 1.56%)  |          |                                                        |          |                                                      |
| 0.018% H 30 s( 87.76%)p 0.14( 12.24%)                |          |                                                        |          |                                                      |
| 0.017% H 34 s( 82.56%)p 0.21( 17.44%)                |          |                                                        |          |                                                      |
| 0.151% H 35 s( 99.50%)p 0.01( 0.50%)                 |          |                                                        |          |                                                      |
| 42. (2.00000)                                        | 98.7323% |                                                        |          | BD ( 1) C 13- H 30                                   |
|                                                      |          |                                                        |          | 0.012% C 3 s( 35.11%)p 1.81( 63.55%)d 0.04( 1.34%)   |
|                                                      |          |                                                        |          | 0.033% C 5 s( 31.09%)p 2.18( 67.76%)d 0.04( 1.15%)   |
|                                                      |          |                                                        |          | 0.048% C 7 s( 87.20%)p 0.14( 12.62%)d 0.00( 0.18%)   |
|                                                      |          | 0.303% C 9 s( 9.71%)p 9.19( 89.21%)d 0.11( 1.09%)      |          |                                                      |
|                                                      |          | 0.269% C 11 s( 40.82%)p 1.44( 58.81%)d 0.01( 0.37%)    |          |                                                      |
|                                                      |          | 59.542% C 13 s( 27.52%)p 2.63( 72.41%)d 0.00( 0.07%)   |          |                                                      |
|                                                      |          | 0.025% C 15 s( 57.20%)p 0.74( 42.25%)d 0.01( 0.55%)    |          |                                                      |
|                                                      |          | 0.233% C 17 s( 5.91%)p 15.73( 92.88%)d 0.21( 1.22%)    |          |                                                      |
|                                                      |          | 0.176% C 19 s( 39.81%)p 1.50( 59.58%)d 0.02( 0.62%)    |          |                                                      |
|                                                      |          | 0.022% H 28 s( 87.07%)p 0.15( 12.93%)                  |          |                                                      |
|                                                      |          | 39.199% H 30 s( 99.94%)p 0.00( 0.06%)                  |          |                                                      |
|                                                      |          | 0.059% H 34 s( 99.47%)p 0.01( 0.53%)                   |          |                                                      |
|                                                      |          | 0.012% H 35 s( 98.18%)p 0.02( 1.82%)                   |          |                                                      |
|                                                      |          | 0.016% N 50 s( 6.87%)p 13.46( 92.51%)d 0.09( 0.61%)    |          |                                                      |
| 0.023% Ru 52 s( 5.97%)p 0.28( 1.65%)d 15.49( 92.38%) |          |                                                        |          |                                                      |
| 43. (2.00000)                                        | 99.2317% | BD ( 1) C 14- C 21                                     |          |                                                      |
|                                                      |          | 0.160% C 12 s( 2.12%)p 45.51( 96.52%)d 0.64( 1.36%)    |          |                                                      |
|                                                      |          | 49.581% C 14 s( 33.43%)p 1.99( 66.47%)d 0.00( 0.09%)   |          |                                                      |
|                                                      |          | 0.020% C 20 s( 47.16%)p 1.11( 52.38%)d 0.01( 0.45%)    |          |                                                      |
|                                                      |          | 49.687% C 21 s( 33.31%)p 2.00( 66.60%)d 0.00( 0.09%)   |          |                                                      |
|                                                      |          | 0.164% C 23 s( 2.81%)p 34.04( 95.78%)d 0.50( 1.40%)    |          |                                                      |
|                                                      |          | 0.149% H 29 s( 99.68%)p 0.00( 0.32%)                   |          |                                                      |
|                                                      |          | 0.020% H 31 s( 85.89%)p 0.16( 14.11%)                  |          |                                                      |
|                                                      |          | 0.015% H 37 s( 81.68%)p 0.22( 18.32%)                  |          |                                                      |
|                                                      |          | 0.165% H 38 s( 99.50%)p 0.01( 0.50%)                   |          |                                                      |
|                                                      |          | 0.018% N 51 s( 24.37%)p 3.10( 75.48%)d 0.01( 0.16%)    |          |                                                      |
|                                                      |          | 44. (2.00000)                                          | 98.8067% | BD ( 1) C 14- H 31                                   |
|                                                      |          |                                                        |          | 0.366% C 12 s( 7.75%)p 11.79( 91.35%)d 0.12( 0.90%)  |
|                                                      |          |                                                        |          | 60.980% C 14 s( 28.75%)p 2.48( 71.18%)d 0.00( 0.07%) |
|                                                      |          |                                                        |          | 0.038% C 20 s( 26.66%)p 2.75( 73.24%)d 0.00( 0.10%)  |
| 0.226% C 21 s( 6.15%)p 15.06( 92.58%)d 0.21( 1.27%)  |          |                                                        |          |                                                      |
| 0.172% C 23 s( 33.82%)p 1.94( 65.54%)d 0.02( 0.64%)  |          |                                                        |          |                                                      |
| 0.050% H 29 s( 99.31%)p 0.01( 0.69%)                 |          |                                                        |          |                                                      |
| 37.839% H 31 s( 99.95%)p 0.00( 0.05%)                |          |                                                        |          |                                                      |
| 0.060% H 37 s( 99.46%)p 0.01( 0.54%)                 |          |                                                        |          |                                                      |
| 0.012% H 38 s( 99.19%)p 0.01( 0.81%)                 |          |                                                        |          |                                                      |
| 0.219% N 51 s( 32.89%)p 2.03( 66.66%)d 0.01( 0.45%)  |          |                                                        |          |                                                      |
| 45. (2.00000)                                        | 98.8865% |                                                        |          | BD ( 1) C 15- C 19                                   |
|                                                      |          |                                                        |          | 0.028% C 4 s( 60.35%)p 0.66( 39.54%)d 0.00( 0.11%)   |
|                                                      |          |                                                        |          | 0.014% C 9 s( 37.27%)p 1.65( 61.41%)d 0.04( 1.32%)   |
|                                                      |          |                                                        |          | 0.023% C 10 s( 67.03%)p 0.48( 32.26%)d 0.01( 0.70%)  |
|                                                      |          | 0.319% C 11 s( 6.09%)p 15.29( 93.07%)d 0.14( 0.84%)    |          |                                                      |
|                                                      |          | 0.010% C 13 s( 49.24%)p 0.99( 48.55%)d 0.04( 2.21%)    |          |                                                      |
|                                                      |          | 49.413% C 15 s( 32.99%)p 2.03( 66.92%)d 0.00( 0.10%)   |          |                                                      |
|                                                      |          | 0.156% C 17 s( 4.51%)p 20.82( 93.84%)d 0.37( 1.65%)    |          |                                                      |
|                                                      |          | 49.519% C 19 s( 34.11%)p 1.93( 65.81%)d 0.00( 0.08%)   |          |                                                      |
|                                                      |          | 0.015% H 33 s( 81.27%)p 0.23( 18.73%)                  |          |                                                      |
|                                                      |          | 0.158% H 34 s( 99.35%)p 0.01( 0.65%)                   |          |                                                      |
|                                                      |          | 0.015% H 35 s( 81.52%)p 0.23( 18.48%)                  |          |                                                      |
|                                                      |          | 0.045% Cl 49 s( 13.84%)p 6.16( 85.22%)d 0.07( 0.93%)   |          |                                                      |

|               |                                                |               |                                               |         |                                                |
|---------------|------------------------------------------------|---------------|-----------------------------------------------|---------|------------------------------------------------|
| 46. (2.00000) | 98.7405%                                       | 0.010%        | N 50 s( 30.84%)p 2.24( 68.97%)d 0.01( 0.18%)  |         |                                                |
|               |                                                | 0.248%        | Ru 52 s( 8.92%)p 0.28( 2.47%)d 9.94( 88.61%)  |         |                                                |
|               |                                                | BD ( 1)       | C 15- H 33                                    |         |                                                |
|               |                                                | 0.013%        | C 7 s( 30.05%)p 2.30( 68.97%)d 0.03( 0.98%)   |         |                                                |
|               |                                                | 0.199%        | C 9 s( 30.07%)p 2.31( 69.35%)d 0.02( 0.58%)   |         |                                                |
|               |                                                | 0.042%        | C 10 s( 4.75%)p19.76( 93.81%)d 0.30( 1.44%)   |         |                                                |
|               |                                                | 0.338%        | C 11 s( 8.19%)p11.06( 90.64%)d 0.14( 1.17%)   |         |                                                |
|               |                                                | 0.030%        | C 13 s( 58.28%)p 0.71( 41.42%)d 0.01( 0.31%)  |         |                                                |
|               |                                                | 60.226%       | C 15 s( 27.03%)p 2.70( 72.91%)d 0.00( 0.07%)  |         |                                                |
|               |                                                | 0.192%        | C 17 s( 39.12%)p 1.54( 60.35%)d 0.01( 0.53%)  |         |                                                |
|               |                                                | 0.253%        | C 19 s( 6.86%)p13.39( 91.80%)d 0.20( 1.34%)   |         |                                                |
|               |                                                | 38.526%       | H 33 s( 99.92%)p 0.00( 0.08%)                 |         |                                                |
|               |                                                | 0.011%        | H 34 s( 97.47%)p 0.03( 2.53%)                 |         |                                                |
|               |                                                | 0.064%        | H 35 s( 99.56%)p 0.00( 0.44%)                 |         |                                                |
|               |                                                | 47. (2.00000) | 98.9969%                                      | 0.013%  | O 48 s( 4.83%)p18.57( 89.64%)d 1.15( 5.54%)    |
| 0.010%        | Cl 49 s( 12.71%)p 6.71( 85.28%)d 0.16( 2.00%)  |               |                                               |         |                                                |
| 0.046%        | Ru 52 s( 6.34%)p 0.41( 2.58%)d14.36( 91.08%)   |               |                                               |         |                                                |
| BD ( 1)       | C 16- C 18                                     |               |                                               |         |                                                |
| 0.047%        | C 6 s( 38.31%)p 1.61( 61.50%)d 0.01( 0.20%)    |               |                                               |         |                                                |
| 0.018%        | C 8 s( 57.00%)p 0.75( 42.83%)d 0.00( 0.17%)    |               |                                               |         |                                                |
| 47.679%       | C 16 s( 37.07%)p 1.70( 62.84%)d 0.00( 0.09%)   |               |                                               |         |                                                |
| 51.346%       | C 18 s( 34.49%)p 1.90( 65.42%)d 0.00( 0.09%)   |               |                                               |         |                                                |
| 0.161%        | C 20 s( 33.13%)p 2.01( 66.45%)d 0.01( 0.42%)   |               |                                               |         |                                                |
| 0.224%        | C 22 s( 10.80%)p 8.15( 87.94%)d 0.12( 1.26%)   |               |                                               |         |                                                |
| 0.143%        | C 24 s( 2.17%)p44.43( 96.29%)d 0.71( 1.54%)    |               |                                               |         |                                                |
| 0.027%        | H 32 s( 93.36%)p 0.07( 6.64%)                  |               |                                               |         |                                                |
| 0.147%        | H 36 s( 99.08%)p 0.01( 0.92%)                  |               |                                               |         |                                                |
| 0.011%        | N 51 s( 21.17%)p 3.66( 77.41%)d 0.07( 1.42%)   |               |                                               |         |                                                |
| 48. (2.00000) | 98.5648%                                       |               |                                               | 0.134%  | Ru 53 s( 24.62%)p 1.33( 32.81%)d 1.73( 42.57%) |
|               |                                                | BD ( 1)       | C 16- C 22                                    |         |                                                |
|               |                                                | 0.061%        | C 6 s( 23.10%)p 3.32( 76.75%)d 0.01( 0.15%)   |         |                                                |
|               |                                                | 0.011%        | C 8 s( 35.27%)p 1.82( 64.16%)d 0.02( 0.57%)   |         |                                                |
|               |                                                | 0.019%        | C 12 s( 30.54%)p 2.26( 69.06%)d 0.01( 0.40%)  |         |                                                |
|               |                                                | 45.846%       | C 16 s( 34.99%)p 1.86( 64.91%)d 0.00( 0.10%)  |         |                                                |
|               |                                                | 0.171%        | C 18 s( 7.74%)p11.75( 90.98%)d 0.16( 1.28%)   |         |                                                |
|               |                                                | 0.200%        | C 20 s( 4.22%)p22.19( 93.66%)d 0.50( 2.11%)   |         |                                                |
|               |                                                | 52.767%       | C 22 s( 32.06%)p 2.12( 67.88%)d 0.00( 0.06%)  |         |                                                |
|               |                                                | 0.116%        | C 23 s( 26.09%)p 2.80( 73.16%)d 0.03( 0.75%)  |         |                                                |
|               |                                                | 0.172%        | C 25 s( 1.47%)p65.77( 96.73%)d 1.22( 1.80%)   |         |                                                |
|               |                                                | 0.190%        | H 32 s( 99.78%)p 0.00( 0.22%)                 |         |                                                |
|               |                                                | 0.016%        | H 38 s( 99.54%)p 0.00( 0.46%)                 |         |                                                |
|               |                                                | 0.172%        | H 39 s( 99.00%)p 0.01( 1.00%)                 |         |                                                |
|               |                                                | 49. (2.00000) | 93.1540%                                      | 0.013%  | O 45 s( 0.74%)p99.99( 99.07%)d 0.25( 0.19%)    |
| 0.060%        | N 51 s( 83.07%)p 0.18( 15.13%)d 0.02( 1.80%)   |               |                                               |         |                                                |
| 0.136%        | Ru 53 s( 25.95%)p 0.81( 21.09%)d 2.04( 52.96%) |               |                                               |         |                                                |
| BD ( 1)       | C 16-Ru 53                                     |               |                                               |         |                                                |
| 0.921%        | C 6 s( 37.95%)p 1.63( 61.82%)d 0.01( 0.23%)    |               |                                               |         |                                                |
| 0.837%        | C 8 s( 33.57%)p 1.97( 66.12%)d 0.01( 0.31%)    |               |                                               |         |                                                |
| 0.062%        | C 12 s( 41.33%)p 1.41( 58.29%)d 0.01( 0.38%)   |               |                                               |         |                                                |
| 54.834%       | C 16 s( 28.89%)p 2.46( 71.10%)d 0.00( 0.01%)   |               |                                               |         |                                                |
| 0.405%        | C 18 s( 11.10%)p 7.85( 87.20%)d 0.15( 1.70%)   |               |                                               |         |                                                |
| 0.120%        | C 20 s( 73.57%)p 0.36( 26.23%)d 0.00( 0.20%)   |               |                                               |         |                                                |
| 0.422%        | C 22 s( 18.53%)p 4.31( 79.78%)d 0.09( 1.69%)   |               |                                               |         |                                                |
| 0.043%        | C 23 s( 28.82%)p 2.46( 71.04%)d 0.01( 0.14%)   |               |                                               |         |                                                |
| 0.303%        | C 24 s( 43.28%)p 1.30( 56.17%)d 0.01( 0.55%)   |               |                                               |         |                                                |
| 0.348%        | C 25 s( 38.07%)p 1.61( 61.40%)d 0.01( 0.53%)   |               |                                               |         |                                                |
| 0.046%        | C 26 s( 59.66%)p 0.67( 39.82%)d 0.01( 0.52%)   |               |                                               |         |                                                |
| 0.126%        | H 32 s( 99.49%)p 0.01( 0.51%)                  |               |                                               |         |                                                |
| 0.021%        | H 36 s( 98.04%)p 0.02( 1.96%)                  |               |                                               |         |                                                |
| 0.029%        | H 39 s( 98.20%)p 0.02( 1.80%)                  |               |                                               |         |                                                |
| 0.126%        | O 45 s( 1.30%)p75.15( 97.86%)d 0.64( 0.83%)    |               |                                               |         |                                                |
| 0.134%        | O 46 s( 0.68%)p99.99( 98.40%)d 1.35( 0.92%)    |               |                                               |         |                                                |
| 0.242%        | O 47 s( 24.15%)p 3.11( 75.10%)d 0.03( 0.76%)   |               |                                               |         |                                                |
| 0.055%        | Cl 49 s( 20.51%)p 2.32( 47.55%)d 1.56( 31.93%) |               |                                               |         |                                                |
| 0.288%        | N 51 s( 13.85%)p 6.17( 85.48%)d 0.05( 0.67%)   |               |                                               |         |                                                |
| 0.049%        | Ru 52 s( 0.25%)p26.13( 6.56%)d99.99( 93.19%)   |               |                                               |         |                                                |
| 40.543%       | Ru 53 s( 10.83%)p 0.00( 0.02%)d 8.23( 89.15%)  |               |                                               |         |                                                |
| 50. (2.00000) | 99.2274%                                       | BD ( 1)       | C 17- C 19                                    |         |                                                |
|               |                                                | 0.018%        | C 9 s( 65.12%)p 0.53( 34.28%)d 0.01( 0.61%)   |         |                                                |
|               |                                                | 0.015%        | C 11 s( 38.41%)p 1.60( 61.48%)d 0.00( 0.11%)  |         |                                                |
|               |                                                | 0.170%        | C 13 s( 2.86%)p33.51( 95.70%)d 0.51( 1.45%)   |         |                                                |
|               |                                                | 0.157%        | C 15 s( 5.24%)p17.87( 93.69%)d 0.20( 1.07%)   |         |                                                |
|               |                                                | 49.810%       | C 17 s( 33.34%)p 2.00( 66.57%)d 0.00( 0.09%)  |         |                                                |
|               |                                                | 49.459%       | C 19 s( 33.57%)p 1.98( 66.34%)d 0.00( 0.09%)  |         |                                                |
|               |                                                | 0.167%        | H 30 s( 99.34%)p 0.01( 0.66%)                 |         |                                                |
|               |                                                | 0.145%        | H 33 s( 99.68%)p 0.00( 0.32%)                 |         |                                                |
|               |                                                | 0.017%        | H 34 s( 81.85%)p 0.22( 18.15%)                |         |                                                |
|               |                                                | 0.015%        | H 35 s( 77.26%)p 0.29( 22.74%)                |         |                                                |
|               |                                                | 51. (2.00000) | 81.4793%                                      | BD ( 2) | C 17- C 19                                     |
|               |                                                |               |                                               | 0.235%  | C 1 s( 0.00%)p 1.00( 99.97%)d 0.00( 0.03%)     |
|               |                                                |               |                                               | 0.055%  | C 3 s( 0.03%)p99.99( 99.05%)d33.57( 0.92%)     |
|               |                                                |               |                                               | 0.200%  | C 5 s( 0.01%)p 1.00( 99.79%)d 0.00( 0.20%)     |
| 0.749%        | C 7 s( 0.01%)p 1.00( 99.28%)d 0.01( 0.72%)     |               |                                               |         |                                                |
| 3.579%        | C 9 s( 0.00%)p 1.00( 99.82%)d 0.00( 0.18%)     |               |                                               |         |                                                |
| 1.642%        | C 11 s( 0.02%)p99.99( 99.70%)d12.48( 0.28%)    |               |                                               |         |                                                |
| 5.323%        | C 13 s( 0.00%)p 1.00( 99.67%)d 0.00( 0.33%)    |               |                                               |         |                                                |
| 6.391%        | C 15 s( 0.00%)p 1.00( 99.78%)d 0.00( 0.22%)    |               |                                               |         |                                                |
| 40.470%       | C 17 s( 0.00%)p 1.00( 99.98%)d 0.00( 0.02%)    |               |                                               |         |                                                |
| 41.044%       | C 19 s( 0.00%)p 1.00( 99.98%)d 0.00( 0.02%)    |               |                                               |         |                                                |
| 0.016%        | H 34 s( 0.01%)p 1.00( 99.99%)                  |               |                                               |         |                                                |
| 0.016%        | H 35 s( 0.01%)p99.99( 99.99%)                  |               |                                               |         |                                                |
| 0.231%        | N 50 s( 0.16%)p99.99( 99.17%)d 4.28( 0.68%)    |               |                                               |         |                                                |
| 0.011%        | Ru 52 s( 0.74%)p12.50( 9.30%)d99.99( 89.96%)   |               |                                               |         |                                                |
| 52. (2.00000) | 98.8650%                                       | BD ( 1)       | C 17- H 34                                    |         |                                                |
|               |                                                | 0.013%        | C 7 s( 43.93%)p 1.26( 55.47%)d 0.01( 0.60%)   |         |                                                |
|               |                                                | 0.195%        | C 9 s( 28.45%)p 2.49( 70.94%)d 0.02( 0.61%)   |         |                                                |
|               |                                                | 0.055%        | C 11 s( 43.52%)p 1.30( 56.38%)d 0.00( 0.10%)  |         |                                                |
|               |                                                | 0.268%        | C 13 s( 7.00%)p13.15( 91.97%)d 0.15( 1.03%)   |         |                                                |
|               |                                                | 0.181%        | C 15 s( 34.54%)p 1.88( 64.85%)d 0.02( 0.61%)  |         |                                                |
|               |                                                | 60.251%       | C 17 s( 27.98%)p 2.57( 71.94%)d 0.00( 0.08%)  |         |                                                |
|               |                                                | 0.241%        | C 19 s( 6.93%)p13.29( 92.12%)d 0.14( 0.95%)   |         |                                                |
|               |                                                | 0.061%        | H 30 s( 99.44%)p 0.01( 0.56%)                 |         |                                                |
|               |                                                | 38.623%       | H 34 s( 99.96%)p 0.00( 0.04%)                 |         |                                                |
|               |                                                | 0.059%        | H 35 s( 99.93%)p 0.01( 0.68%)                 |         |                                                |
|               |                                                | 0.025%        | Ru 52 s( 30.49%)p 0.17( 5.32%)d 2.11( 64.19%) |         |                                                |
|               |                                                | 53. (2.00000) | 98.9017%                                      | BD ( 1) | C 18- C 24                                     |
|               |                                                |               |                                               | 0.022%  | C 6 s( 65.94%)p 0.51( 33.33%)d 0.01( 0.73%)    |
|               |                                                |               |                                               | 0.029%  | C 8 s( 62.73%)p 0.59( 37.17%)d 0.00( 0.10%)    |
| 0.311%        | C 16 s( 6.22%)p14.93( 92.92%)d 0.14( 0.86%)    |               |                                               |         |                                                |
| 49.378%       | C 18 s( 32.98%)p 2.03( 66.93%)d 0.00( 0.10%)   |               |                                               |         |                                                |
| 0.014%        | C 22 s( 39.58%)p 1.56( 60.08%)d 0.03( 1.34%)   |               |                                               |         |                                                |
| 49.569%       | C 24 s( 34.16%)p 1.93( 65.76%)d 0.00( 0.08%)   |               |                                               |         |                                                |
| 0.010%        | C 25 s( 48.68%)p 1.01( 49.13%)d 0.04( 2.19%)   |               |                                               |         |                                                |
| 0.155%        | C 26 s( 4.66%)p20.12( 93.69%)d 0.36( 1.66%)    |               |                                               |         |                                                |
| 0.015%        | H 32 s( 80.59%)p 0.24( 19.41%)                 |               |                                               |         |                                                |
| 0.015%        | H 36 s( 81.95%)p 0.22( 18.05%)                 |               |                                               |         |                                                |

|     |           |          |         |                     |                 |                |  |
|-----|-----------|----------|---------|---------------------|-----------------|----------------|--|
|     |           |          | 0.158%  | H 40 s( 99.33%)p    | 0.01( 0.67%)    |                |  |
|     |           |          | 0.046%  | Cl 49 s( 13.88%)p   | 6.14( 85.23%)d  | 0.06( 0.89%)   |  |
|     |           |          | 0.010%  | N 51 s( 31.09%)p    | 2.21( 68.68%)d  | 0.01( 0.23%)   |  |
|     |           |          | 0.249%  | Ru 53 s( 8.37%)p    | 0.30( 2.48%)d   | 10.65( 89.15%) |  |
| 54. | (2.00000) | 80.9416% |         | BD ( 2 ) C 18- C 24 |                 |                |  |
|     |           |          | 0.012%  | C 6 s( 4.87%)p      | 19.16( 93.29%)d | 0.38( 1.84%)   |  |
|     |           |          | 0.176%  | C 14 s( 0.00%)p     | 1.00( 99.96%)d  | 0.00( 0.04%)   |  |
|     |           |          | 6.237%  | C 16 s( 0.00%)p     | 1.00( 99.72%)d  | 0.00( 0.28%)   |  |
|     |           |          | 41.307% | C 18 s( 0.00%)p     | 1.00( 99.97%)d  | 0.00( 0.03%)   |  |
|     |           |          | 0.629%  | C 20 s( 0.00%)p     | 1.00( 99.21%)d  | 0.01( 0.79%)   |  |
|     |           |          | 0.089%  | C 21 s( 0.03%)p     | 99.99( 99.38%)d | 21.88( 0.59%)  |  |
|     |           |          | 3.413%  | C 22 s( 0.00%)p     | 1.00( 99.75%)d  | 0.00( 0.24%)   |  |
|     |           |          | 0.101%  | C 23 s( 0.11%)p     | 99.99( 99.01%)d | 8.06( 0.88%)   |  |
|     |           |          | 39.636% | C 24 s( 0.00%)p     | 1.00( 99.97%)d  | 0.00( 0.03%)   |  |
|     |           |          | 4.084%  | C 25 s( 0.00%)p     | 1.00( 99.88%)d  | 0.00( 0.12%)   |  |
|     |           |          | 3.991%  | C 26 s( 0.00%)p     | 1.00( 99.59%)d  | 0.00( 0.41%)   |  |
|     |           |          | 0.010%  | H 32 s( 0.12%)p     | 99.99( 99.88%)  |                |  |
|     |           |          | 0.016%  | H 36 s( 0.01%)p     | 99.99( 99.99%)  |                |  |
|     |           |          | 0.239%  | N 51 s( 0.17%)p     | 99.99( 99.66%)d | 0.97( 0.16%)   |  |
|     |           |          | 0.021%  | Ru 53 s( 0.44%)p    | 70.65( 31.14%)d | 99.99( 68.42%) |  |
| 55. | (2.00000) | 98.7365% |         | BD ( 1 ) C 18- H 32 |                 |                |  |
|     |           |          | 0.041%  | C 6 s( 5.05%)p      | 18.52( 93.52%)d | 0.28( 1.43%)   |  |
|     |           |          | 0.340%  | C 16 s( 8.11%)p     | 11.19( 90.70%)d | 0.15( 1.20%)   |  |
|     |           |          | 60.315% | C 18 s( 27.08%)p    | 2.69( 72.85%)d  | 0.00( 0.07%)   |  |
|     |           |          | 0.014%  | C 20 s( 30.06%)p    | 2.29( 68.95%)d  | 0.03( 0.99%)   |  |
|     |           |          | 0.197%  | C 22 s( 30.06%)p    | 2.31( 69.33%)d  | 0.02( 0.61%)   |  |
|     |           |          | 0.256%  | C 24 s( 6.82%)p     | 13.46( 91.82%)d | 0.20( 1.36%)   |  |
|     |           |          | 0.030%  | C 25 s( 58.68%)p    | 0.70( 41.01%)d  | 0.01( 0.31%)   |  |
|     |           |          | 0.194%  | C 26 s( 39.15%)p    | 1.54( 60.32%)d  | 0.01( 0.53%)   |  |
|     |           |          | 38.434% | H 32 s( 99.92%)p    | 0.00( 0.08%)    |                |  |
|     |           |          | 0.065%  | H 36 s( 99.56%)p    | 0.00( 0.44%)    |                |  |
|     |           |          | 0.011%  | H 40 s( 97.50%)p    | 0.03( 2.50%)    |                |  |
|     |           |          | 0.013%  | O 45 s( 3.76%)p     | 24.16( 90.94%)d | 1.41( 5.30%)   |  |
|     |           |          | 0.011%  | Cl 49 s( 13.70%)p   | 6.16( 84.38%)d  | 0.14( 1.92%)   |  |
|     |           |          | 0.047%  | Ru 53 s( 6.50%)p    | 0.41( 2.68%)d   | 13.96( 90.82%) |  |
| 56. | (2.00000) | 98.8262% |         | BD ( 1 ) C 19- H 35 |                 |                |  |
|     |           |          | 0.037%  | C 9 s( 26.04%)p     | 2.83( 73.61%)d  | 0.01( 0.36%)   |  |
|     |           |          | 0.251%  | C 11 s( 42.19%)p    | 1.36( 57.46%)d  | 0.01( 0.35%)   |  |
|     |           |          | 0.184%  | C 13 s( 38.31%)p    | 1.59( 61.09%)d  | 0.02( 0.60%)   |  |
|     |           |          | 0.276%  | C 15 s( 6.43%)p     | 14.41( 92.69%)d | 0.14( 0.88%)   |  |
|     |           |          | 0.237%  | C 17 s( 7.03%)p     | 13.09( 91.97%)d | 0.14( 1.00%)   |  |
|     |           |          | 60.211% | C 19 s( 27.77%)p    | 2.60( 72.15%)d  | 0.00( 0.08%)   |  |
|     |           |          | 0.012%  | H 30 s( 98.43%)p    | 0.02( 1.57%)    |                |  |
|     |           |          | 0.066%  | H 33 s( 99.56%)p    | 0.00( 0.44%)    |                |  |
|     |           |          | 0.061%  | H 34 s( 99.52%)p    | 0.00( 0.48%)    |                |  |
|     |           |          | 38.620% | H 35 s( 99.96%)p    | 0.00( 0.04%)    |                |  |
|     |           |          | 0.019%  | Ru 52 s( 4.18%)p    | 0.89( 3.73%)d   | 22.02( 92.09%) |  |
| 57. | (2.00000) | 98.6211% |         | BD ( 1 ) C 20- C 22 |                 |                |  |
|     |           |          | 0.219%  | C 12 s( 33.17%)p    | 2.00( 66.48%)d  | 0.01( 0.35%)   |  |
|     |           |          | 0.015%  | C 14 s( 74.11%)p    | 0.35( 25.62%)d  | 0.00( 0.26%)   |  |
|     |           |          | 0.153%  | C 16 s( 6.71%)p     | 13.67( 91.75%)d | 0.23( 1.54%)   |  |
|     |           |          | 0.100%  | C 18 s( 35.23%)p    | 1.82( 64.12%)d  | 0.02( 0.65%)   |  |
|     |           |          | 50.142% | C 20 s( 32.69%)p    | 2.06( 67.26%)d  | 0.00( 0.05%)   |  |
|     |           |          | 0.092%  | C 21 s( 34.66%)p    | 1.86( 64.32%)d  | 0.03( 1.02%)   |  |
|     |           |          | 48.514% | C 22 s( 28.77%)p    | 2.47( 71.16%)d  | 0.00( 0.07%)   |  |
|     |           |          | 0.148%  | C 23 s( 4.62%)p     | 20.25( 93.49%)d | 0.41( 1.89%)   |  |
|     |           |          | 0.016%  | C 24 s( 69.09%)p    | 0.44( 30.61%)d  | 0.00( 0.30%)   |  |
|     |           |          | 0.145%  | C 25 s( 2.89%)p     | 33.04( 95.49%)d | 0.56( 1.61%)   |  |
|     |           |          | 0.090%  | C 26 s( 35.73%)p    | 1.77( 63.36%)d  | 0.03( 0.91%)   |  |
|     |           |          | 0.044%  | H 38 s( 99.43%)p    | 0.01( 0.57%)    |                |  |
|     |           |          | 0.045%  | H 39 s( 99.71%)p    | 0.00( 0.29%)    |                |  |
|     |           |          | 0.198%  | N 51 s( 15.63%)p    | 5.29( 82.65%)d  | 0.11( 1.72%)   |  |
|     |           |          | 0.021%  | Ru 53 s( 49.88%)p   | 0.36( 17.75%)d  | 0.65( 32.37%)  |  |
| 58. | (2.00000) | 98.9889% |         | BD ( 1 ) C 20- C 23 |                 |                |  |
|     |           |          | 0.068%  | C 6 s( 83.63%)p     | 0.19( 16.29%)d  | 0.00( 0.08%)   |  |
|     |           |          | 0.024%  | C 8 s( 19.01%)p     | 4.25( 80.86%)d  | 0.01( 0.14%)   |  |
|     |           |          | 0.116%  | C 16 s( 42.53%)p    | 1.33( 56.77%)d  | 0.02( 0.70%)   |  |
|     |           |          | 49.801% | C 20 s( 33.74%)p    | 1.96( 66.19%)d  | 0.00( 0.07%)   |  |
|     |           |          | 0.160%  | C 21 s( 4.26%)p     | 22.11( 94.21%)d | 0.36( 1.53%)   |  |
|     |           |          | 0.139%  | C 22 s( 11.42%)p    | 7.64( 87.22%)d  | 0.12( 1.35%)   |  |
|     |           |          | 49.230% | C 23 s( 32.43%)p    | 2.08( 67.48%)d  | 0.00( 0.09%)   |  |
|     |           |          | 0.154%  | H 37 s( 99.41%)p    | 0.01( 0.59%)    |                |  |
|     |           |          | 0.013%  | H 38 s( 93.23%)p    | 0.07( 6.77%)    |                |  |
|     |           |          | 0.115%  | N 51 s( 5.39%)p     | 17.31( 93.25%)d | 0.25( 1.36%)   |  |
|     |           |          | 0.134%  | Ru 53 s( 24.84%)p   | 0.13( 3.20%)d   | 2.90( 71.97%)  |  |
| 59. | (2.00000) | 99.0904% |         | BD ( 1 ) C 20- N 51 |                 |                |  |
|     |           |          | 0.022%  | C 6 s( 5.39%)p      | 17.39( 93.78%)d | 0.15( 0.82%)   |  |
|     |           |          | 0.160%  | C 12 s( 6.75%)p     | 13.54( 91.42%)d | 0.27( 1.83%)   |  |
|     |           |          | 0.036%  | C 16 s( 63.27%)p    | 0.57( 36.00%)d  | 0.01( 0.73%)   |  |
|     |           |          | 40.478% | C 20 s( 28.71%)p    | 2.48( 71.22%)d  | 0.00( 0.07%)   |  |
|     |           |          | 0.103%  | C 22 s( 8.77%)p     | 10.21( 89.60%)d | 0.19( 1.63%)   |  |
|     |           |          | 0.086%  | C 23 s( 7.71%)p     | 11.66( 89.87%)d | 0.31( 2.42%)   |  |
|     |           |          | 0.057%  | C 25 s( 22.46%)p    | 3.44( 77.17%)d  | 0.02( 0.38%)   |  |
|     |           |          | 0.148%  | H 29 s( 99.95%)p    | 0.00( 0.05%)    |                |  |
|     |           |          | 0.106%  | H 38 s( 99.21%)p    | 0.01( 0.79%)    |                |  |
|     |           |          | 58.624% | N 51 s( 33.85%)p    | 1.95( 65.97%)d  | 0.01( 0.18%)   |  |
|     |           |          | 0.115%  | Ru 53 s( 24.97%)p   | 0.83( 20.64%)d  | 2.18( 54.39%)  |  |
| 60. | (2.00000) | 85.7160% |         | BD ( 2 ) C 20- N 51 |                 |                |  |
|     |           |          | 0.117%  | C 6 s( 1.60%)p      | 61.19( 97.96%)d | 0.27( 0.44%)   |  |
|     |           |          | 0.025%  | C 8 s( 20.29%)p     | 3.83( 77.74%)d  | 0.10( 1.97%)   |  |
|     |           |          | 0.023%  | C 10 s( 11.00%)p    | 8.06( 88.67%)d  | 0.03( 0.33%)   |  |
|     |           |          | 6.286%  | C 12 s( 0.01%)p     | 99.99( 99.46%)d | 40.81( 0.52%)  |  |
|     |           |          | 2.032%  | C 14 s( 0.01%)p     | 1.00( 99.82%)d  | 0.00( 0.17%)   |  |
|     |           |          | 0.167%  | C 16 s( 0.32%)p     | 99.99( 98.80%)d | 2.77( 0.88%)   |  |
|     |           |          | 0.031%  | C 18 s( 0.45%)p     | 99.99( 97.48%)d | 4.66( 2.08%)   |  |
|     |           |          | 27.838% | C 20 s( 0.00%)p     | 1.00( 99.91%)d  | 0.00( 0.09%)   |  |
|     |           |          | 2.142%  | C 21 s( 0.00%)p     | 1.00( 99.86%)d  | 0.00( 0.14%)   |  |
|     |           |          | 0.599%  | C 22 s( 0.05%)p     | 99.99( 98.60%)d | 25.95( 1.35%)  |  |
|     |           |          | 2.242%  | C 23 s( 0.00%)p     | 1.00( 99.54%)d  | 0.00( 0.46%)   |  |
|     |           |          | 0.122%  | C 24 s( 0.03%)p     | 99.99( 99.89%)d | 2.25( 0.07%)   |  |
|     |           |          | 0.240%  | C 25 s( 0.03%)p     | 99.99( 99.85%)d | 4.21( 0.12%)   |  |
|     |           |          | 0.040%  | O 45 s( 0.04%)p     | 99.99( 99.90%)d | 1.78( 0.07%)   |  |
|     |           |          | 57.918% | N 51 s( 0.00%)p     | 1.00( 99.91%)d  | 0.00( 0.09%)   |  |
|     |           |          | 0.016%  | Ru 52 s( 32.27%)p   | 0.46( 14.98%)d  | 1.63( 52.75%)  |  |
|     |           |          | 0.127%  | Ru 53 s( 0.59%)p    | 37.81( 22.39%)d | 99.99( 77.02%) |  |
| 61. | (2.00000) | 99.1915% |         | BD ( 1 ) C 21- C 23 |                 |                |  |
|     |           |          | 0.015%  | C 12 s( 52.35%)p    | 0.88( 46.29%)d  | 0.03( 1.36%)   |  |
|     |           |          | 0.152%  | C 14 s( 2.60%)p     | 36.87( 95.90%)d | 0.58( 1.50%)   |  |
|     |           |          | 0.219%  | C 20 s( 3.55%)p     | 26.80( 95.14%)d | 0.37( 1.31%)   |  |
|     |           |          | 49.297% | C 21 s( 33.62%)p    | 1.97( 66.28%)d  | 0.00( 0.09%)   |  |
|     |           |          | 0.143%  | C 22 s( 30.87%)p    | 2.23( 68.74%)d  | 0.01( 0.39%)   |  |
|     |           |          | 49.936% | C 23 s( 33.94%)p    | 1.94( 65.97%)d  | 0.00( 0.09%)   |  |
|     |           |          | 0.153%  | H 31 s( 99.58%)p    | 0.00( 0.42%)    |                |  |
|     |           |          | 0.016%  | H 37 s( 83.29%)p    | 0.20( 16.71%)   |                |  |
|     |           |          | 0.020%  | H 38 s( 89.23%)p    | 0.12( 10.77%)   |                |  |
|     |           |          | 0.020%  | N 51 s( 25.35%)p    | 2.93( 74.34%)d  | 0.01( 0.31%)   |  |



|               |                  |               |                  |                 |                 |                 |                |  |  |
|---------------|------------------|---------------|------------------|-----------------|-----------------|-----------------|----------------|--|--|
| 62. (2.00000) | 80.8607%         | BD ( 2)       | C 21- C 23       |                 |                 |                 |                |  |  |
|               |                  | 0.023%        | C 6 s( 1.68%)    | p58.35( 97.85%) | d 0.28( 0.48%)  |                 |                |  |  |
|               |                  | 0.012%        | C 10 s( 6.56%)   | p14.16( 92.83%) | d 0.09( 0.62%)  |                 |                |  |  |
|               |                  | 2.820%        | C 12 s( 0.00%)   | p 1.00( 99.85%) | d 0.00( 0.15%)  |                 |                |  |  |
|               |                  | 3.232%        | C 14 s( 0.00%)   | p 1.00( 99.53%) | d 0.00( 0.47%)  |                 |                |  |  |
|               |                  | 0.109%        | C 16 s( 0.07%)   | p99.99( 99.88%) | d 0.66( 0.05%)  |                 |                |  |  |
|               |                  | 9.983%        | C 20 s( 0.00%)   | p 1.00( 99.80%) | d 0.00( 0.20%)  |                 |                |  |  |
|               |                  | 35.844%       | C 21 s( 0.00%)   | p 1.00( 99.96%) | d 0.00( 0.04%)  |                 |                |  |  |
|               |                  | 0.179%        | C 22 s( 0.01%)   | p99.99( 98.46%) | d99.99( 1.53%)  |                 |                |  |  |
|               |                  | 45.120%       | C 23 s( 0.00%)   | p 1.00( 99.97%) | d 0.00( 0.03%)  |                 |                |  |  |
|               |                  | 0.051%        | C 24 s( 0.02%)   | p99.99( 99.92%) | d 2.58( 0.05%)  |                 |                |  |  |
|               |                  | 0.051%        | C 25 s( 0.08%)   | p99.99( 98.88%) | d12.70( 1.04%)  |                 |                |  |  |
|               |                  | 0.012%        | H 38 s( 0.49%)   | p99.99( 99.51%) |                 |                 |                |  |  |
|               |                  | 2.501%        | N 51 s( 0.01%)   | p99.99( 99.83%) | d12.71( 0.16%)  |                 |                |  |  |
|               |                  | 0.011%        | Ru 53 s( 1.25%)  | p 3.04( 3.79%)  | d76.24( 94.97%) |                 |                |  |  |
|               |                  | 63. (2.00000) | 98.9191%         | BD ( 1)         | C 21- H 37      |                 |                |  |  |
|               |                  |               |                  | 0.180%          | C 12 s( 39.82%) | p 1.50( 59.53%) | d 0.02( 0.65%) |  |  |
| 0.220%        | C 14 s( 5.96%)   |               |                  | p15.59( 92.92%) | d 0.19( 1.12%)  |                 |                |  |  |
| 0.200%        | C 20 s( 30.63%)  |               |                  | p 2.25( 68.78%) | d 0.02( 0.59%)  |                 |                |  |  |
| 60.775%       | C 21 s( 28.39%)  |               |                  | p 2.52( 71.54%) | d 0.00( 0.08%)  |                 |                |  |  |
| 0.013%        | C 22 s( 41.08%)  |               |                  | p 1.43( 58.59%) | d 0.01( 0.33%)  |                 |                |  |  |
| 0.252%        | C 23 s( 6.09%)   |               |                  | p15.25( 92.78%) | d 0.19( 1.13%)  |                 |                |  |  |
| 0.010%        | H 29 s( 99.95%)  |               |                  | p 0.00( 0.05%)  |                 |                 |                |  |  |
| 0.062%        | H 31 s( 99.28%)  |               |                  | p 0.01( 0.72%)  |                 |                 |                |  |  |
| 38.151%       | H 37 s( 99.96%)  |               |                  | p 0.00( 0.04%)  |                 |                 |                |  |  |
| 0.063%        | H 38 s( 99.31%)  |               |                  | p 0.01( 0.69%)  |                 |                 |                |  |  |
| 0.036%        | N 51 s( 66.93%)  |               |                  | p 0.49( 32.57%) | d 0.01( 0.50%)  |                 |                |  |  |
| 0.011%        | Ru 53 s( 38.44%) |               |                  | p 0.30( 11.55%) | d 1.30( 50.01%) |                 |                |  |  |
| 64. (2.00000) | 98.6995%         |               |                  | BD ( 1)         | C 22- C 25      |                 |                |  |  |
|               |                  |               |                  | 0.013%          | C 6 s( 60.25%)  | p 0.66( 39.60%) | d 0.00( 0.15%) |  |  |
|               |                  |               |                  | 0.020%          | C 8 s( 58.51%)  | p 0.71( 41.42%) | d 0.00( 0.07%) |  |  |
|               |                  |               |                  | 0.260%          | C 16 s( 3.51%)  | p27.17( 95.43%) | d 0.30( 1.06%) |  |  |
|               |                  | 0.202%        | C 20 s( 9.26%)   | p 9.61( 88.98%) | d 0.19( 1.75%)  |                 |                |  |  |
|               |                  | 50.323%       | C 22 s( 31.86%)  | p 2.14( 68.08%) | d 0.00( 0.07%)  |                 |                |  |  |
|               |                  | 0.015%        | C 24 s( 63.68%)  | p 0.54( 34.65%) | d 0.03( 1.67%)  |                 |                |  |  |
|               |                  | 48.451%       | C 25 s( 33.07%)  | p 2.02( 66.84%) | d 0.00( 0.08%)  |                 |                |  |  |
|               |                  | 0.162%        | C 26 s( 4.21%)   | p22.38( 94.27%) | d 0.36( 1.52%)  |                 |                |  |  |
|               |                  | 0.011%        | H 39 s( 87.06%)  | p 0.15( 12.94%) |                 |                 |                |  |  |
|               |                  | 0.150%        | H 40 s( 99.39%)  | p 0.01( 0.61%)  |                 |                 |                |  |  |
|               |                  | 0.038%        | Cl 49 s( 14.28%) | p 5.96( 85.10%) | d 0.04( 0.62%)  |                 |                |  |  |
|               |                  | 0.117%        | N 51 s( 57.47%)  | p 0.72( 41.17%) | d 0.02( 1.36%)  |                 |                |  |  |
|               |                  | 0.204%        | Ru 53 s( 15.34%) | p 0.09( 1.36%)  | d 5.43( 83.30%) |                 |                |  |  |
|               |                  | 65. (2.00000) | 98.7096%         | BD ( 1)         | C 23- H 38      |                 |                |  |  |
|               |                  |               |                  | 0.029%          | C 12 s( 64.68%) | p 0.54( 35.11%) | d 0.00( 0.21%) |  |  |
|               |                  |               |                  | 0.176%          | C 14 s( 36.97%) | p 1.69( 62.43%) | d 0.02( 0.60%) |  |  |
| 0.016%        | C 16 s( 7.52%)   |               |                  | p12.25( 92.12%) | d 0.05( 0.36%)  |                 |                |  |  |
| 0.394%        | C 20 s( 11.06%)  |               |                  | p 7.94( 87.88%) | d 0.10( 1.06%)  |                 |                |  |  |
| 0.235%        | C 21 s( 5.16%)   |               |                  | p18.12( 93.49%) | d 0.26( 1.35%)  |                 |                |  |  |
| 0.026%        | C 22 s( 84.93%)  |               |                  | p 0.17( 14.51%) | d 0.01( 0.56%)  |                 |                |  |  |
| 60.411%       | C 23 s( 28.16%)  |               |                  | p 2.55( 71.77%) | d 0.00( 0.07%)  |                 |                |  |  |
| 0.024%        | C 25 s( 43.26%)  |               |                  | p 1.28( 55.42%) | d 0.03( 1.32%)  |                 |                |  |  |
| 0.012%        | C 26 s( 35.02%)  |               |                  | p 1.82( 63.89%) | d 0.03( 1.08%)  |                 |                |  |  |
| 0.011%        | H 31 s( 98.93%)  |               |                  | p 0.01( 1.07%)  |                 |                 |                |  |  |
| 0.064%        | H 37 s( 99.44%)  |               |                  | p 0.01( 0.56%)  |                 |                 |                |  |  |
| 38.313%       | H 38 s( 99.94%)  |               |                  | p 0.00( 0.06%)  |                 |                 |                |  |  |
| 0.015%        | H 39 s( 87.29%)  |               |                  | p 0.15( 12.71%) |                 |                 |                |  |  |
| 0.236%        | N 51 s( 30.58%)  |               |                  | p 2.25( 68.92%) | d 0.02( 0.49%)  |                 |                |  |  |
| 0.011%        | Ru 53 s( 13.54%) |               |                  | p 0.13( 1.80%)  | d 6.25( 84.66%) |                 |                |  |  |
| 66. (2.00000) | 99.2273%         |               |                  | BD ( 1)         | C 24- C 26      |                 |                |  |  |
|               |                  | 0.015%        | C 16 s( 38.91%)  | p 1.57( 61.00%) | d 0.00( 0.10%)  |                 |                |  |  |
|               |                  | 0.157%        | C 18 s( 5.19%)   | p18.05( 93.75%) | d 0.20( 1.06%)  |                 |                |  |  |
|               |                  | 0.018%        | C 22 s( 67.08%)  | p 0.48( 32.30%) | d 0.01( 0.62%)  |                 |                |  |  |
|               |                  | 49.427%       | C 24 s( 33.54%)  | p 1.98( 66.37%) | d 0.00( 0.09%)  |                 |                |  |  |
|               |                  | 0.171%        | C 25 s( 2.88%)   | p33.17( 95.65%) | d 0.51( 1.46%)  |                 |                |  |  |
|               |                  | 49.841%       | C 26 s( 33.32%)  | p 2.00( 66.59%) | d 0.00( 0.09%)  |                 |                |  |  |
|               |                  | 0.144%        | H 32 s( 99.69%)  | p 0.00( 0.31%)  |                 |                 |                |  |  |
|               |                  | 0.014%        | H 36 s( 76.88%)  | p 0.30( 23.12%) |                 |                 |                |  |  |
|               |                  | 0.169%        | H 39 s( 99.33%)  | p 0.01( 0.67%)  |                 |                 |                |  |  |
|               |                  | 0.016%        | H 40 s( 82.09%)  | p 0.22( 17.91%) |                 |                 |                |  |  |
|               |                  | 67. (2.00000) | 98.8252%         | BD ( 1)         | C 24- H 36      |                 |                |  |  |
|               |                  |               |                  | 0.249%          | C 16 s( 41.95%) | p 1.38( 57.71%) | d 0.01( 0.35%) |  |  |
|               |                  |               |                  | 0.277%          | C 18 s( 6.34%)  | p14.63( 92.79%) | d 0.14( 0.87%) |  |  |
|               |                  |               |                  | 0.037%          | C 22 s( 26.07%) | p 2.82( 73.57%) | d 0.01( 0.36%) |  |  |
|               |                  |               |                  | 60.256%         | C 24 s( 27.79%) | p 2.60( 72.14%) | d 0.00( 0.08%) |  |  |
|               |                  |               |                  | 0.184%          | C 25 s( 37.98%) | p 1.62( 61.41%) | d 0.02( 0.61%) |  |  |
| 0.237%        | C 26 s( 7.02%)   |               |                  | p13.09( 91.97%) | d 0.14( 1.01%)  |                 |                |  |  |
| 0.066%        | H 32 s( 99.54%)  |               |                  | p 0.00( 0.46%)  |                 |                 |                |  |  |
| 38.575%       | H 36 s( 99.96%)  |               |                  | p 0.00( 0.04%)  |                 |                 |                |  |  |
| 0.012%        | H 39 s( 98.49%)  |               |                  | p 0.02( 1.51%)  |                 |                 |                |  |  |
| 0.062%        | H 40 s( 99.53%)  |               |                  | p 0.00( 0.47%)  |                 |                 |                |  |  |
| 0.019%        | Ru 53 s( 4.20%)  |               |                  | p 0.85( 3.55%)  | d21.98( 92.25%) |                 |                |  |  |
| 68. (2.00000) | 99.1668%         |               |                  | BD ( 1)         | C 25- C 26      |                 |                |  |  |
|               |                  |               |                  | 0.017%          | C 16 s( 34.81%) | p 1.86( 64.87%) | d 0.01( 0.33%) |  |  |
|               |                  |               |                  | 0.012%          | C 18 s( 63.80%) | p 0.54( 34.38%) | d 0.03( 1.82%) |  |  |
|               |                  |               |                  | 0.150%          | C 20 s( 40.06%) | p 1.48( 59.44%) | d 0.01( 0.49%) |  |  |
|               |                  |               |                  | 0.232%          | C 22 s( 4.39%)  | p21.48( 94.38%) | d 0.28( 1.23%) |  |  |
|               |                  | 0.151%        | C 24 s( 2.83%)   | p33.83( 95.63%) | d 0.55( 1.55%)  |                 |                |  |  |
|               |                  | 50.015%       | C 25 s( 34.05%)  | p 1.93( 65.87%) | d 0.00( 0.09%)  |                 |                |  |  |
|               |                  | 49.200%       | C 26 s( 33.57%)  | p 1.98( 66.33%) | d 0.00( 0.09%)  |                 |                |  |  |
|               |                  | 0.149%        | H 36 s( 99.50%)  | p 0.00( 0.50%)  |                 |                 |                |  |  |
|               |                  | 0.018%        | H 39 s( 87.97%)  | p 0.14( 12.03%) |                 |                 |                |  |  |
|               |                  | 0.017%        | H 40 s( 82.58%)  | p 0.21( 17.42%) |                 |                 |                |  |  |
|               |                  | 69. (2.00000) | 83.7465%         | BD ( 2)         | C 25- C 26      |                 |                |  |  |
|               |                  |               |                  | 0.016%          | C 6 s( 7.01%)   | p13.21( 92.60%) | d 0.06( 0.40%) |  |  |
|               |                  |               |                  | 0.010%          | C 8 s( 29.45%)  | p 2.35( 69.21%) | d 0.05( 1.34%) |  |  |
|               |                  |               |                  | 0.012%          | C 12 s( 0.33%)  | p99.99( 99.67%) | d 0.02( 0.01%) |  |  |
|               |                  |               |                  | 3.610%          | C 16 s( 0.00%)  | p99.99( 99.94%) | d 1.49( 0.03%) |  |  |
|               |                  |               |                  | 2.303%          | C 18 s( 0.00%)  | p 1.00( 99.81%) | d 0.00( 0.19%) |  |  |
| 0.021%        | C 20 s( 0.55%)   |               |                  | p99.99( 94.09%) | d 9.75( 5.36%)  |                 |                |  |  |
| 2.863%        | C 22 s( 0.00%)   |               |                  | p 1.00( 99.43%) | d 0.01( 0.57%)  |                 |                |  |  |
| 7.232%        | C 24 s( 0.00%)   |               |                  | p 1.00( 99.75%) | d 0.00( 0.25%)  |                 |                |  |  |
| 39.036%       | C 25 s( 0.00%)   |               |                  | p 1.00( 99.97%) | d 0.00( 0.03%)  |                 |                |  |  |
| 44.760%       | C 26 s( 0.00%)   |               |                  | p 1.00( 99.98%) | d 0.00( 0.02%)  |                 |                |  |  |
| 0.017%        | H 39 s( 0.03%)   |               |                  | p99.99( 99.97%) |                 |                 |                |  |  |
| 0.020%        | H 40 s( 0.03%)   |               |                  | p99.99( 99.97%) |                 |                 |                |  |  |
| 0.022%        | N 51 s( 2.49%)   |               |                  | p38.82( 96.69%) | d 0.33( 0.82%)  |                 |                |  |  |
| 0.019%        | Ru 53 s( 1.88%)  |               |                  | p 3.24( 6.08%)  | d49.04( 92.04%) |                 |                |  |  |
| 70. (2.00000) | 98.7355%         |               |                  | BD ( 1)         | C 25- H 39      |                 |                |  |  |
|               |                  |               |                  | 0.269%          | C 16 s( 40.66%) | p 1.45( 58.97%) | d 0.01( 0.37%) |  |  |
|               |                  | 0.025%        | C 18 s( 57.17%)  | p 0.74( 42.30%) | d 0.01( 0.54%)  |                 |                |  |  |
|               |                  | 0.049%        | C 20 s( 86.98%)  | p 0.15( 12.83%) | d 0.00( 0.19%)  |                 |                |  |  |
|               |                  | 0.012%        | C 21 s( 35.35%)  | p 1.79( 63.31%) | d 0.04( 1.34%)  |                 |                |  |  |
|               |                  | 0.302%        | C 22 s( 9.94%)   | p 8.95( 88.97%) | d 0.11( 1.09%)  |                 |                |  |  |
|               |                  | 0.033%        | C 23 s( 30.76%)  | p 2.21( 68.10%) | d 0.04( 1.14%)  |                 |                |  |  |
|               |                  | 0.176%        | C 24 s( 39.95%)  | p 1.49( 59.44%) | d 0.02( 0.61%)  |                 |                |  |  |
|               |                  | 59.564%       | C 25 s( 27.53%)  | p 2.63( 72.40%) | d 0.00( 0.07%)  |                 |                |  |  |

|     |           |          |                                                |
|-----|-----------|----------|------------------------------------------------|
|     |           | 0.233%   | C 26 s( 5.93%)p15.67( 92.87%)d 0.20( 1.21%)    |
|     |           | 0.012%   | H 36 s( 98.16%)p 0.02( 1.84%)                  |
|     |           | 0.021%   | H 38 s( 86.85%)p 0.15( 13.15%)                 |
|     |           | 39.180%  | H 39 s( 99.94%)p 0.00( 0.06%)                  |
|     |           | 0.059%   | H 40 s( 99.45%)p 0.01( 0.55%)                  |
|     |           | 0.016%   | N 51 s( 7.12%)p12.96( 92.27%)d 0.09( 0.62%)    |
|     |           | 0.023%   | Ru 53 s( 6.10%)p 0.29( 1.75%)d15.10( 92.15%)   |
| 71. | (2.00000) | 98.8650% | BD ( 1) C 26- H 40                             |
|     |           | 0.055%   | C 16 s( 44.37%)p 1.25( 55.54%)d 0.00( 0.09%)   |
|     |           | 0.180%   | C 18 s( 34.46%)p 1.88( 64.93%)d 0.02( 0.61%)   |
|     |           | 0.013%   | C 20 s( 43.73%)p 1.27( 55.65%)d 0.01( 0.62%)   |
|     |           | 0.198%   | C 22 s( 28.51%)p 2.49( 70.87%)d 0.02( 0.61%)   |
|     |           | 0.239%   | C 24 s( 6.91%)p13.33( 92.13%)d 0.14( 0.96%)    |
|     |           | 0.269%   | C 25 s( 6.93%)p13.29( 92.04%)d 0.15( 1.03%)    |
|     |           | 60.280%  | C 26 s( 28.00%)p 2.57( 71.92%)d 0.00( 0.08%)   |
|     |           | 0.059%   | H 36 s( 99.30%)p 0.01( 0.70%)                  |
|     |           | 0.061%   | H 39 s( 99.45%)p 0.01( 0.55%)                  |
|     |           | 38.595%  | H 40 s( 99.96%)p 0.00( 0.04%)                  |
|     |           | 0.025%   | Ru 53 s( 30.48%)p 0.18( 5.44%)d 2.10( 64.07%)  |
| 72. | (2.00000) | 99.3945% | BD ( 1) H 43- O 47                             |
|     |           | 0.069%   | C 4 s( 14.41%)p 5.92( 85.22%)d 0.03( 0.37%)    |
|     |           | 0.013%   | C 6 s( 54.90%)p 0.81( 44.52%)d 0.01( 0.59%)    |
|     |           | 0.073%   | C 8 s( 11.65%)p 7.56( 88.01%)d 0.03( 0.34%)    |
|     |           | 0.017%   | C 10 s( 27.63%)p 2.58( 71.41%)d 0.03( 0.96%)   |
|     |           | 0.012%   | C 11 s( 23.50%)p 3.23( 75.84%)d 0.03( 0.66%)   |
|     |           | 0.014%   | C 16 s( 14.44%)p 5.85( 84.48%)d 0.07( 1.08%)   |
|     |           | 24.295%  | H 43 s( 99.97%)p 0.00( 0.03%)                  |
|     |           | 0.019%   | O 44 s( 2.42%)p40.21( 97.36%)d 0.09( 0.22%)    |
|     |           | 0.021%   | O 46 s( 2.26%)p43.09( 97.52%)d 0.09( 0.21%)    |
|     |           | 75.100%  | O 47 s( 23.13%)p 3.31( 76.65%)d 0.01( 0.23%)   |
|     |           | 0.012%   | N 50 s( 35.84%)p 1.71( 61.12%)d 0.09( 3.05%)   |
|     |           | 0.015%   | N 51 s( 39.66%)p 1.48( 58.81%)d 0.04( 1.53%)   |
|     |           | 0.135%   | Ru 52 s( 17.06%)p 1.39( 23.64%)d 3.48( 59.30%) |
|     |           | 0.150%   | Ru 53 s( 21.10%)p 0.94( 19.90%)d 2.80( 59.01%) |

CMO: NBO Analysis of Canonical Molecular Orbitals

SECOND ORDER PERTURBATION THEORY ANALYSIS OF FOCK MATRIX IN NBO BASIS

Threshold for printing: 0.50 kcal/mol  
 (Intermolecular threshold: 0.05 kcal/mol)

| Donor NBO (i)      | Acceptor NBO (j)     | E(2)<br>kcal/mol | E(j)-E(i)<br>a.u. | F(i,j)<br>a.u. |
|--------------------|----------------------|------------------|-------------------|----------------|
| within unit 1      |                      |                  |                   |                |
| 1. BD (1) C 1- C 2 | 199. RY*(2) C 3      | 0.94             | 2.37              | 0.042          |
| 1. BD (1) C 1- C 2 | 737. RY*(1) N50      | 1.70             | 2.49              | 0.058          |
| 1. BD (1) C 1- C 2 | 869. BD*(1) C 3- H41 | 2.46             | 1.03              | 0.045          |
| 1. BD (1) C 1- C 2 | 876. BD*(1) C10-Ru52 | 0.50             | 0.77              | 0.019          |
| 1. BD (1) C 1- C 2 | 880. BD*(1) C 1- C 3 | 0.71             | 1.11              | 0.025          |
| 1. BD (1) C 1- C 2 | 884. BD*(1) C 2- N50 | 0.52             | 1.10              | 0.021          |
| 2. BD (2) C 1- C 2 | 200. RY*(3) C 3      | 0.94             | 0.77              | 0.027          |
| 2. BD (2) C 1- C 2 | 738. RY*(2) N50      | 0.80             | 1.13              | 0.030          |
| 2. BD (2) C 1- C 2 | 868. BD*(2) C 3- C 5 | 16.54            | 0.23              | 0.056          |
| 2. BD (2) C 1- C 2 | 882. BD*(2) C 1- C 2 | 0.61             | 0.23              | 0.011          |
| 2. BD (2) C 1- C 2 | 887. BD*(2) C 7- N50 | 10.73            | 0.21              | 0.044          |
| 3. BD (1) C 1- C 3 | 230. RY*(3) C 5      | 0.93             | 2.30              | 0.041          |
| 3. BD (1) C 1- C 3 | 867. BD*(1) C 3- C 5 | 0.82             | 1.12              | 0.027          |
| 3. BD (1) C 1- C 3 | 871. BD*(1) C 5- H28 | 2.50             | 1.03              | 0.045          |
| 3. BD (1) C 1- C 3 | 881. BD*(1) C 1- C 2 | 0.75             | 1.12              | 0.026          |
| 3. BD (1) C 1- C 3 | 885. BD*(1) C 2- H27 | 2.38             | 1.03              | 0.044          |
| 4. BD (1) C 1- H42 | 183. RY*(1) C 2      | 0.63             | 2.03              | 0.032          |
| 4. BD (1) C 1- H42 | 198. RY*(1) C 3      | 0.84             | 2.23              | 0.039          |
| 4. BD (1) C 1- H42 | 867. BD*(1) C 3- C 5 | 3.38             | 0.95              | 0.051          |
| 4. BD (1) C 1- H42 | 884. BD*(1) C 2- N50 | 5.29             | 0.92              | 0.062          |
| 5. BD (1) C 2- H27 | 168. RY*(1) C 1      | 0.88             | 2.14              | 0.039          |
| 5. BD (1) C 2- H27 | 737. RY*(1) N50      | 1.76             | 2.31              | 0.057          |
| 5. BD (1) C 2- H27 | 778. RY*(12) Ru52    | 0.57             | 6.38              | 0.054          |
| 5. BD (1) C 2- H27 | 880. BD*(1) C 1- C 3 | 3.32             | 0.93              | 0.050          |
| 5. BD (1) C 2- H27 | 886. BD*(1) C 7- N50 | 6.74             | 0.90              | 0.070          |
| 6. BD (1) C 2- N50 | 170. RY*(3) C 1      | 0.82             | 2.64              | 0.042          |
| 6. BD (1) C 2- N50 | 188. RY*(6) C 2      | 0.64             | 3.82              | 0.044          |
| 6. BD (1) C 2- N50 | 196. RY*(14) C 2     | 0.63             | 40.84             | 0.143          |
| 6. BD (1) C 2- N50 | 197. RY*(15) C 2     | 0.93             | 26.69             | 0.141          |
| 6. BD (1) C 2- N50 | 258. RY*(1) C 7      | 0.82             | 2.30              | 0.039          |
| 6. BD (1) C 2- N50 | 260. RY*(3) C 7      | 1.73             | 2.71              | 0.061          |
| 6. BD (1) C 2- N50 | 740. RY*(4) N50      | 1.33             | 5.86              | 0.079          |
| 6. BD (1) C 2- N50 | 744. RY*(8) N50      | 0.51             | 14.46             | 0.077          |
| 6. BD (1) C 2- N50 | 767. RY*(1) Ru52     | 1.08             | 7.57              | 0.081          |
| 6. BD (1) C 2- N50 | 768. RY*(2) Ru52     | 1.45             | 4.31              | 0.071          |
| 6. BD (1) C 2- N50 | 773. RY*(7) Ru52     | 1.97             | 9.01              | 0.119          |
| 6. BD (1) C 2- N50 | 775. RY*(9) Ru52     | 1.43             | 10.79             | 0.111          |
| 6. BD (1) C 2- N50 | 776. RY*(10) Ru52    | 0.93             | 9.12              | 0.083          |
| 6. BD (1) C 2- N50 | 778. RY*(12) Ru52    | 2.03             | 6.67              | 0.104          |
| 6. BD (1) C 2- N50 | 779. RY*(13) Ru52    | 2.53             | 15.51             | 0.177          |
| 6. BD (1) C 2- N50 | 783. RY*(17) Ru52    | 1.12             | 13.24             | 0.109          |
| 6. BD (1) C 2- N50 | 789. RY*(23) Ru52    | 1.15             | 11.21             | 0.102          |
| 6. BD (1) C 2- N50 | 791. RY*(24) Ru52    | 1.1913605.71     |                   | 3.603          |
| 6. BD (1) C 2- N50 | 792. RY*(25) Ru52    | 0.6133395.14     |                   | 4.053          |
| 6. BD (1) C 2- N50 | 795. RY*(26) Ru52    | 1.39 1160.17     |                   | 1.138          |
| 6. BD (1) C 2- N50 | 796. RY*(29) Ru52    | 1.27 53.71       |                   | 0.234          |
| 6. BD (1) C 2- N50 | 796. RY*(30) Ru52    | 0.87 19.37       |                   | 0.116          |
| 6. BD (1) C 2- N50 | 804. RY*(38) Ru52    | 1.55 259.07      |                   | 0.568          |
| 6. BD (1) C 2- N50 | 876. BD*(1) C10-Ru52 | 4.24 0.88        |                   | 0.569          |
| 6. BD (1) C 2- N50 | 881. BD*(1) C 1- C 2 | 0.78 1.23        |                   | 0.028          |
| 6. BD (1) C 2- N50 | 883. BD*(1) C 1- H42 | 1.59 1.15        |                   | 0.038          |
| 6. BD (1) C 2- N50 | 886. BD*(1) C 7- N50 | 0.62 1.19        |                   | 0.024          |
| 6. BD (1) C 2- N50 | 888. BD*(1) C 7- C 9 | 2.74 1.19        |                   | 0.051          |
| 7. BD (1) C 3- C 5 | 170. RY*(3) C 1      | 0.88             | 2.53              | 0.042          |
| 7. BD (1) C 3- C 5 | 258. RY*(1) C 7      | 0.69             | 2.19              | 0.035          |
| 7. BD (1) C 3- C 5 | 870. BD*(1) C 5- C 7 | 1.08 1.13        |                   | 0.031          |
| 7. BD (1) C 3- C 5 | 880. BD*(1) C 1- C 3 | 0.78 1.11        |                   | 0.026          |
| 7. BD (1) C 3- C 5 | 883. BD*(1) C 1- H42 | 2.47 1.04        |                   | 0.045          |
| 7. BD (1) C 3- C 5 | 888. BD*(1) C 7- C 9 | 3.53 1.08        |                   | 0.055          |
| 8. BD (2) C 3- C 5 | 169. RY*(2) C 1      | 1.08 0.81        |                   | 0.029          |
| 8. BD (2) C 3- C 5 | 264. RY*(7) C 7      | 0.62 2.10        |                   | 0.035          |
| 8. BD (2) C 3- C 5 | 882. BD*(2) C 1- C 2 | 12.44 0.23       |                   | 0.048          |
| 8. BD (2) C 3- C 5 | 887. BD*(2) C 7- N50 | 22.33 0.21       |                   | 0.064          |
| 9. BD (1) C 3- H41 | 168. RY*(1) C 1      | 0.88 2.15        |                   | 0.039          |
| 9. BD (1) C 3- H41 | 228. RY*(1) C 5      | 0.90 2.03        |                   | 0.038          |
| 9. BD (1) C 3- H41 | 870. BD*(1) C 5- C 7 | 3.86 0.96        |                   | 0.054          |
| 9. BD (1) C 3- H41 | 881. BD*(1) C 1- C 2 | 3.36 0.95        |                   | 0.051          |

|     |                  |      |                  |              |         |       |
|-----|------------------|------|------------------|--------------|---------|-------|
| 12. | BD (3) C 4- O44  | 188. | RY*(6) C 2       | 1.15         | 4.14    | 0.062 |
| 12. | BD (3) C 4- O44  | 213. | RY*(1) C 4       | 8.16         | 2.90    | 0.138 |
| 12. | BD (3) C 4- O44  | 216. | RY*(4) C 4       | 1.20         | 3.27    | 0.056 |
| 12. | BD (3) C 4- O44  | 219. | RY*(7) C 4       | 4.67         | 7.74    | 0.170 |
| 12. | BD (3) C 4- O44  | 221. | RY*(9) C 4       | 0.83         | 5.39    | 0.060 |
| 12. | BD (3) C 4- O44  | 227. | RY*(15) C 4      | 0.75         | 27.99   | 0.130 |
| 12. | BD (3) C 4- O44  | 263. | RY*(6) C 7       | 0.77         | 5.31    | 0.057 |
| 12. | BD (3) C 4- O44  | 292. | RY*(5) C 9       | 0.76         | 4.29    | 0.051 |
| 12. | BD (3) C 4- O44  | 303. | RY*(1) C10       | 1.01         | 3.02    | 0.049 |
| 12. | BD (3) C 4- O44  | 310. | RY*(8) C10       | 0.54         | 4.40    | 0.044 |
| 12. | BD (3) C 4- O44  | 321. | RY*(4) C11       | 0.80         | 3.36    | 0.046 |
| 12. | BD (3) C 4- O44  | 383. | RY*(6) C15       | 1.75         | 4.34    | 0.078 |
| 12. | BD (3) C 4- O44  | 645. | RY*(3) O44       | 0.91         | 2.84    | 0.045 |
| 12. | BD (3) C 4- O44  | 646. | RY*(4) O44       | 1.28         | 1.84    | 0.043 |
| 12. | BD (3) C 4- O44  | 706. | RY*(4) O48       | 0.68         | 1.74    | 0.031 |
| 12. | BD (3) C 4- O44  | 767. | RY*(1) Ru52      | 12.29        | 7.89    | 0.278 |
| 12. | BD (3) C 4- O44  | 768. | RY*(2) Ru52      | 7.90         | 4.62    | 0.171 |
| 12. | BD (3) C 4- O44  | 769. | RY*(3) Ru52      | 2.69         | 2.69    | 0.076 |
| 12. | BD (3) C 4- O44  | 770. | RY*(4) Ru52      | 5.13         | 3.39    | 0.118 |
| 12. | BD (3) C 4- O44  | 771. | RY*(5) Ru52      | 7.93         | 7.97    | 0.224 |
| 12. | BD (3) C 4- O44  | 772. | RY*(6) Ru52      | 1.33         | 5.48    | 0.076 |
| 12. | BD (3) C 4- O44  | 773. | RY*(7) Ru52      | 5.03         | 9.32    | 0.193 |
| 12. | BD (3) C 4- O44  | 774. | RY*(8) Ru52      | 1.28         | 4.72    | 0.070 |
| 12. | BD (3) C 4- O44  | 775. | RY*(9) Ru52      | 9.98         | 11.10   | 0.297 |
| 12. | BD (3) C 4- O44  | 776. | RY*(10) Ru52     | 2.44         | 9.44    | 0.135 |
| 12. | BD (3) C 4- O44  | 777. | RY*(11) Ru52     | 0.58         | 6.06    | 0.053 |
| 12. | BD (3) C 4- O44  | 778. | RY*(12) Ru52     | 3.07         | 6.99    | 0.131 |
| 12. | BD (3) C 4- O44  | 779. | RY*(13) Ru52     | 3.97         | 15.82   | 0.224 |
| 12. | BD (3) C 4- O44  | 780. | RY*(14) Ru52     | 2.07         | 9.88    | 0.128 |
| 12. | BD (3) C 4- O44  | 781. | RY*(15) Ru52     | 2.42         | 8.63    | 0.129 |
| 12. | BD (3) C 4- O44  | 783. | RY*(17) Ru52     | 5.73         | 13.56   | 0.249 |
| 12. | BD (3) C 4- O44  | 785. | RY*(19) Ru52     | 3.62         | 8.20    | 0.154 |
| 12. | BD (3) C 4- O44  | 787. | RY*(21) Ru52     | 0.85         | 13.57   | 0.096 |
| 12. | BD (3) C 4- O44  | 788. | RY*(22) Ru52     | 0.57         | 10.82   | 0.070 |
| 12. | BD (3) C 4- O44  | 789. | RY*(23) Ru52     | 6.74         | 11.52   | 0.249 |
| 12. | BD (3) C 4- O44  | 790. | RY*(24) Ru52     | 6.9613606.02 |         | 8.698 |
| 12. | BD (3) C 4- O44  | 791. | RY*(25) Ru52     | 3.6033395.46 |         | 9.795 |
| 12. | BD (3) C 4- O44  | 792. | RY*(26) Ru52     | 8.23 1160.48 |         | 2.762 |
| 12. | BD (3) C 4- O44  | 793. | RY*(27) Ru52     | 0.70         | 51.36   | 0.169 |
| 12. | BD (3) C 4- O44  | 795. | RY*(29) Ru52     | 8.11         | 54.02   | 0.591 |
| 12. | BD (3) C 4- O44  | 796. | RY*(30) Ru52     | 5.66         | 19.68   | 0.298 |
| 12. | BD (3) C 4- O44  | 799. | RY*(33) Ru52     | 1.62         | 89.29   | 0.340 |
| 12. | BD (3) C 4- O44  | 804. | RY*(38) Ru52     | 9.17         | 259.39  | 1.378 |
| 12. | BD (3) C 4- O44  | 807. | RY*(41) Ru52     | 0.64         | 82.08   | 0.205 |
| 12. | BD (3) C 4- O44  | 811. | RY*(45) Ru52     | 0.99         | 51.78   | 0.203 |
| 12. | BD (3) C 4- O44  | 812. | RY*(46) Ru52     | 0.69         | 187.20  | 0.321 |
| 13. | BD (1) C 4- Ru52 | 213. | RY*(1) C 4       | 0.52         | 2.34    | 0.031 |
| 13. | BD (1) C 4- Ru52 | 303. | RY*(1) C10       | 0.51         | 2.46    | 0.032 |
| 13. | BD (1) C 4- Ru52 | 304. | RY*(2) C10       | 2.33         | 1.49    | 0.054 |
| 13. | BD (1) C 4- Ru52 | 305. | RY*(3) C10       | 4.10         | 3.20    | 0.104 |
| 13. | BD (1) C 4- Ru52 | 307. | RY*(5) C10       | 0.53         | 2.49    | 0.033 |
| 13. | BD (1) C 4- Ru52 | 309. | RY*(7) C10       | 1.03         | 6.97    | 0.077 |
| 13. | BD (1) C 4- Ru52 | 310. | RY*(8) C10       | 0.82         | 3.84    | 0.051 |
| 13. | BD (1) C 4- Ru52 | 317. | RY*(15) C10      | 0.71         | 25.64   | 0.123 |
| 13. | BD (1) C 4- Ru52 | 319. | RY*(2) C11       | 0.53         | 1.18    | 0.023 |
| 13. | BD (1) C 4- Ru52 | 645. | RY*(3) O44       | 1.17         | 2.27    | 0.047 |
| 13. | BD (1) C 4- Ru52 | 737. | RY*(1) N50       | 4.47         | 2.36    | 0.093 |
| 13. | BD (1) C 4- Ru52 | 767. | RY*(1) Ru52      | 0.51         | 7.33    | 0.056 |
| 13. | BD (1) C 4- Ru52 | 768. | RY*(2) Ru52      | 1.02         | 4.06    | 0.058 |
| 13. | BD (1) C 4- Ru52 | 771. | RY*(5) Ru52      | 1.10         | 7.41    | 0.082 |
| 13. | BD (1) C 4- Ru52 | 775. | RY*(9) Ru52      | 0.62         | 10.54   | 0.073 |
| 13. | BD (1) C 4- Ru52 | 776. | RY*(10) Ru52     | 0.53         | 8.88    | 0.062 |
| 13. | BD (1) C 4- Ru52 | 785. | RY*(19) Ru52     | 0.54         | 7.64    | 0.058 |
| 13. | BD (1) C 4- Ru52 | 792. | RY*(26) Ru52     | 0.63         | 1159.92 | 0.776 |
| 13. | BD (1) C 4- Ru52 | 795. | RY*(29) Ru52     | 0.88         | 53.46   | 0.197 |
| 13. | BD (1) C 4- Ru52 | 804. | RY*(38) Ru52     | 0.62         | 258.82  | 0.364 |
| 13. | BD (1) C 4- Ru52 | 874. | BD*(3) C 4- O44  | 0.56         | 1.13    | 0.023 |
| 13. | BD (1) C 4- Ru52 | 875. | BD*(1) C 4- Ru52 | 1.15         | 0.63    | 0.026 |
| 13. | BD (1) C 4- Ru52 | 876. | BD*(1) C10- Ru52 | 11.72        | 0.64    | 0.083 |
| 13. | BD (1) C 4- Ru52 | 877. | BD*(1) C10- O48  | 2.10         | 0.54    | 0.031 |
| 13. | BD (1) C 4- Ru52 | 878. | BD*(2) C10- O48  | 2.03         | 0.52    | 0.030 |
| 13. | BD (1) C 4- Ru52 | 879. | BD*(3) C10- O48  | 1.79         | 1.10    | 0.040 |
| 13. | BD (1) C 4- Ru52 | 884. | BD*(1) C 2- N50  | 0.62         | 0.96    | 0.022 |
| 13. | BD (1) C 4- Ru52 | 886. | BD*(1) C 7- N50  | 0.78         | 0.94    | 0.024 |
| 13. | BD (1) C 4- Ru52 | 891. | BD*(1) C 9- C11  | 0.59         | 1.02    | 0.022 |
| 13. | BD (1) C 4- Ru52 | 894. | BD*(1) C11- Ru52 | 12.49        | 0.53    | 0.077 |
| 13. | BD (1) C 4- Ru52 | 895. | BD*(1) C11- C15  | 0.65         | 1.03    | 0.023 |
| 13. | BD (1) C 4- Ru52 | 896. | BD*(2) C11- C15  | 0.61         | 0.54    | 0.017 |
| 14. | BD (1) C 5- C 7  | 199. | RY*(2) C 3       | 1.56         | 2.36    | 0.054 |
| 14. | BD (1) C 5- C 7  | 290. | RY*(3) C 9       | 0.84         | 2.45    | 0.041 |
| 14. | BD (1) C 5- C 7  | 737. | RY*(1) N50       | 0.55         | 2.49    | 0.033 |
| 14. | BD (1) C 5- C 7  | 739. | RY*(3) N50       | 0.54         | 2.77    | 0.035 |
| 14. | BD (1) C 5- C 7  | 867. | BD*(1) C 3- C 5  | 0.92         | 1.13    | 0.029 |
| 14. | BD (1) C 5- C 7  | 869. | BD*(1) C 3- H41  | 2.34         | 1.02    | 0.044 |
| 14. | BD (1) C 5- C 7  | 886. | BD*(1) C 7- N50  | 0.52         | 1.07    | 0.021 |
| 14. | BD (1) C 5- C 7  | 888. | BD*(1) C 7- C 9  | 1.09         | 1.07    | 0.030 |
| 14. | BD (1) C 5- C 7  | 891. | BD*(1) C 9- C11  | 2.18         | 1.14    | 0.045 |
| 15. | BD (1) C 5- H28  | 198. | RY*(1) C 3       | 0.90         | 2.23    | 0.040 |
| 15. | BD (1) C 5- H28  | 258. | RY*(1) C 7       | 1.00         | 2.02    | 0.040 |
| 15. | BD (1) C 5- H28  | 880. | BD*(1) C 1- C 3  | 3.49         | 0.93    | 0.051 |
| 15. | BD (1) C 5- H28  | 886. | BD*(1) C 7- N50  | 5.67         | 0.91    | 0.064 |
| 20. | BD (1) C 7- C 9  | 228. | RY*(1) C 5       | 0.79         | 2.14    | 0.037 |
| 20. | BD (1) C 7- C 9  | 318. | RY*(1) C11       | 1.04         | 1.67    | 0.037 |
| 20. | BD (1) C 7- C 9  | 348. | RY*(1) C13       | 0.89         | 2.15    | 0.039 |
| 20. | BD (1) C 7- C 9  | 354. | RY*(7) C13       | 0.57         | 8.15    | 0.061 |
| 20. | BD (1) C 7- C 9  | 737. | RY*(1) N50       | 0.79         | 2.43    | 0.039 |
| 20. | BD (1) C 7- C 9  | 827. | BD*(1) C 3- C 5  | 2.02         | 1.06    | 0.042 |
| 20. | BD (1) C 7- C 9  | 870. | BD*(1) C 5- C 7  | 0.96         | 1.06    | 0.029 |
| 20. | BD (1) C 7- C 9  | 884. | BD*(1) C 2- N50  | 4.63         | 1.04    | 0.062 |
| 20. | BD (1) C 7- C 9  | 889. | BD*(1) C 9- C13  | 0.88         | 1.08    | 0.028 |
| 20. | BD (1) C 7- C 9  | 891. | BD*(1) C 9- C11  | 1.03         | 1.09    | 0.030 |
| 20. | BD (1) C 7- C 9  | 892. | BD*(1) C13- C17  | 2.11         | 1.08    | 0.043 |
| 20. | BD (1) C 7- C 9  | 895. | BD*(1) C11- C15  | 2.59         | 1.10    | 0.048 |
| 21. | BD (1) C 7- N50  | 185. | RY*(3) C 2       | 2.49         | 2.59    | 0.072 |
| 21. | BD (1) C 7- N50  | 233. | RY*(6) C 5       | 0.56         | 7.08    | 0.056 |
| 21. | BD (1) C 7- N50  | 235. | RY*(8) C 5       | 0.58         | 3.89    | 0.043 |
| 21. | BD (1) C 7- N50  | 266. | RY*(9) C 7       | 0.68         | 12.25   | 0.082 |
| 21. | BD (1) C 7- N50  | 268. | RY*(11) C 7      | 0.54         | 6.06    | 0.051 |
| 21. | BD (1) C 7- N50  | 271. | RY*(14) C 7      | 0.75         | 42.76   | 0.160 |
| 21. | BD (1) C 7- N50  | 272. | RY*(15) C 7      | 0.99         | 24.44   | 0.139 |
| 21. | BD (1) C 7- N50  | 739. | RY*(3) N50       | 0.96         | 2.87    | 0.047 |
| 21. | BD (1) C 7- N50  | 767. | RY*(1) Ru52      | 0.53         | 7.56    | 0.056 |
| 21. | BD (1) C 7- N50  | 773. | RY*(7) Ru52      | 0.75         | 8.99    | 0.074 |
| 21. | BD (1) C 7- N50  | 774. | RY*(8) Ru52      | 0.68         | 4.39    | 0.049 |
| 21. | BD (1) C 7- N50  | 778. | RY*(12) Ru52     | 0.97         | 6.66    | 0.072 |
| 21. | BD (1) C 7- N50  | 779. | RY*(13) Ru52     | 0.87         | 15.49   | 0.104 |

|     |    |     |          |     |      |                 |           |         |        |
|-----|----|-----|----------|-----|------|-----------------|-----------|---------|--------|
| 21. | BD | (1) | C 7-     | N50 | 783. | RY*(17)Ru52     | 0.51      | 13.23   | 0.074  |
| 21. | BD | (1) | C 7-     | N50 | 870. | BD*(1) C 5-     | 1.02      | 1.22    | 0.032  |
| 21. | BD | (1) | C 7-     | N50 | 871. | BD*(1) C 5-     | 1.64      | 1.13    | 0.038  |
| 21. | BD | (1) | C 7-     | N50 | 876. | BD*(1) C10-Ru52 | 5.03      | 0.87    | 0.064  |
| 21. | BD | (1) | C 7-     | N50 | 885. | BD*(1) C 2-     | 1.92      | 1.13    | 0.042  |
| 21. | BD | (1) | C 7-     | N50 | 888. | BD*(1) C 7-     | 0.63      | 1.17    | 0.024  |
| 21. | BD | (1) | C 7-     | N50 | 889. | BD*(1) C 9-     | 2.30      | 1.24    | 0.048  |
| 22. | BD | (2) | C 7-     | N50 | 184. | RY*(2) C 2      | 2.74      | 0.92    | 0.048  |
| 22. | BD | (2) | C 7-     | N50 | 229. | RY*(2) C 5      | 0.93      | 0.76    | 0.026  |
| 22. | BD | (2) | C 7-     | N50 | 289. | RY*(2) C 9      | 0.72      | 0.83    | 0.024  |
| 22. | BD | (2) | C 7-     | N50 | 769. | RY*(3)Ru52      | 0.51      | 1.90    | 0.030  |
| 22. | BD | (2) | C 7-     | N50 | 868. | BD*(2) C 3-     | 7.62      | 0.27    | 0.041  |
| 22. | BD | (2) | C 7-     | N50 | 882. | BD*(2) C 1-     | 20.36     | 0.27    | 0.067  |
| 22. | BD | (2) | C 7-     | N50 | 890. | BD*(2) C 9-     | 7.56      | 0.30    | 0.044  |
| 27. | BD | (1) | C 9-     | C11 | 258. | RY*(1) C 7      | 0.87      | 2.14    | 0.039  |
| 27. | BD | (1) | C 9-     | C11 | 290. | RY*(3) C 9      | 0.61      | 2.41    | 0.034  |
| 27. | BD | (1) | C 9-     | C11 | 292. | RY*(5) C 9      | 0.53      | 3.81    | 0.040  |
| 27. | BD | (1) | C 9-     | C11 | 296. | RY*(9) C 9      | 0.83      | 15.13   | 0.101  |
| 27. | BD | (1) | C 9-     | C11 | 301. | RY*(14) C 9     | 0.81      | 42.44   | 0.166  |
| 27. | BD | (1) | C 9-     | C11 | 302. | RY*(15) C 9     | 0.94      | 25.97   | 0.140  |
| 27. | BD | (1) | C 9-     | C11 | 318. | RY*(1) C11      | 0.66      | 1.68    | 0.030  |
| 27. | BD | (1) | C 9-     | C11 | 350. | RY*(3) C13      | 0.76      | 2.37    | 0.038  |
| 27. | BD | (1) | C 9-     | C11 | 351. | RY*(4) C13      | 0.97      | 2.13    | 0.041  |
| 27. | BD | (1) | C 9-     | C11 | 355. | RY*(8) C13      | 0.51      | 3.39    | 0.037  |
| 27. | BD | (1) | C 9-     | C11 | 380. | RY*(3) C15      | 1.51      | 2.34    | 0.053  |
| 27. | BD | (1) | C 9-     | C11 | 767. | RY*(1)Ru52      | 0.98      | 7.41    | 0.076  |
| 27. | BD | (1) | C 9-     | C11 | 770. | RY*(4)Ru52      | 0.69      | 2.91    | 0.040  |
| 27. | BD | (1) | C 9-     | C11 | 773. | RY*(7)Ru52      | 1.40      | 8.84    | 0.100  |
| 27. | BD | (1) | C 9-     | C11 | 774. | RY*(8)Ru52      | 0.72      | 4.24    | 0.050  |
| 27. | BD | (1) | C 9-     | C11 | 775. | RY*(9)Ru52      | 0.52      | 10.62   | 0.067  |
| 27. | BD | (1) | C 9-     | C11 | 778. | RY*(12)Ru52     | 0.95      | 6.51    | 0.071  |
| 27. | BD | (1) | C 9-     | C11 | 779. | RY*(13)Ru52     | 1.06      | 15.34   | 0.115  |
| 27. | BD | (1) | C 9-     | C11 | 780. | RY*(14)Ru52     | 0.54      | 9.40    | 0.064  |
| 27. | BD | (1) | C 9-     | C11 | 781. | RY*(15)Ru52     | 0.62      | 8.15    | 0.064  |
| 27. | BD | (1) | C 9-     | C11 | 783. | RY*(17)Ru52     | 0.50      | 13.08   | 0.073  |
| 27. | BD | (1) | C 9-     | C11 | 788. | RY*(22)Ru52     | 0.63      | 10.34   | 0.073  |
| 27. | BD | (1) | C 9-     | C11 | 790. | RY*(24)Ru52     | 0.5713605 | 5.4     | 2.502  |
| 27. | BD | (1) | C 9-     | C11 | 792. | RY*(26)Ru52     | 0.66      | 1160.00 | 0.787  |
| 27. | BD | (1) | C 9-     | C11 | 795. | RY*(29)Ru52     | 0.54      | 53.54   | 0.152  |
| 27. | BD | (1) | C 9-     | C11 | 796. | RY*(30)Ru52     | 0.51      | 19.20   | 0.089  |
| 27. | BD | (1) | C 9-     | C11 | 800. | RY*(34)Ru52     | 0.62      | 50.17   | 0.159  |
| 27. | BD | (1) | C 9-     | C11 | 804. | RY*(38)Ru52     | 0.74      | 258.91  | 0.394  |
| 27. | BD | (1) | C 9-     | C11 | 870. | BD*(1) C 5-     | 3.41      | 1.07    | 0.054  |
| 27. | BD | (1) | C 9-     | C11 | 888. | BD*(1) C 7-     | 1.02      | 1.02    | 0.029  |
| 27. | BD | (1) | C 9-     | C11 | 889. | BD*(1) C 9-     | 2.08      | 1.09    | 0.042  |
| 27. | BD | (1) | C 9-     | C11 | 893. | BD*(1) C13-     | 2.31      | 1.00    | 0.043  |
| 27. | BD | (1) | C 9-     | C11 | 895. | BD*(1) C11-     | 0.55      | 1.11    | 0.022  |
| 27. | BD | (1) | C 9-     | C11 | 902. | BD*(1) C15-     | 2.88      | 1.01    | 0.048  |
| 28. | BD | (1) | C 9-     | C13 | 260. | RY*(3) C 7      | 1.19      | 2.56    | 0.049  |
| 28. | BD | (1) | C 9-     | C13 | 320. | RY*(3) C11      | 0.65      | 1.66    | 0.029  |
| 28. | BD | (1) | C 9-     | C13 | 410. | RY*(3) C17      | 1.74      | 2.54    | 0.060  |
| 28. | BD | (1) | C 9-     | C13 | 886. | BD*(1) C 7-     | 2.78      | 1.04    | 0.048  |
| 28. | BD | (1) | C 9-     | C13 | 888. | BD*(1) C 7-     | 0.98      | 1.04    | 0.028  |
| 28. | BD | (1) | C 9-     | C13 | 891. | BD*(1) C 9-     | 2.13      | 1.12    | 0.044  |
| 28. | BD | (1) | C 9-     | C13 | 892. | BD*(1) C13-     | 1.01      | 1.11    | 0.030  |
| 28. | BD | (1) | C 9-     | C13 | 894. | BD*(1) C11-     | 3.42      | 0.63    | 0.045  |
| 28. | BD | (1) | C 9-     | C13 | 899. | BD*(1) C17-     | 2.30      | 1.02    | 0.043  |
| 29. | BD | (2) | C 9-     | C13 | 289. | RY*(2) C 9      | 0.81      | 0.76    | 0.024  |
| 29. | BD | (2) | C 9-     | C13 | 319. | RY*(2) C11      | 0.98      | 0.87    | 0.029  |
| 29. | BD | (2) | C 9-     | C13 | 409. | RY*(2) C17      | 1.02      | 0.73    | 0.027  |
| 29. | BD | (2) | C 9-     | C13 | 887. | BD*(2) C 7-     | 23.39     | 0.18    | 0.060  |
| 29. | BD | (2) | C 9-     | C13 | 890. | BD*(2) C 9-     | 0.52      | 0.23    | 0.010  |
| 29. | BD | (2) | C 9-     | C13 | 896. | BD*(2) C11-     | 15.44     | 0.24    | 0.055  |
| 29. | BD | (2) | C 9-     | C13 | 898. | BD*(2) C17-     | 14.39     | 0.22    | 0.051  |
| 30. | BD | (1) | C10-     | O48 | 769. | RY*(3)Ru52      | 0.86      | 2.02    | 0.037  |
| 30. | BD | (1) | C10-     | O48 | 877. | BD*(1) C10-     | 0.51      | 0.43    | 0.014  |
| 32. | BD | (3) | C10-     | O48 | 188. | RY*(6) C 2      | 1.00      | 4.10    | 0.057  |
| 32. | BD | (3) | C10-     | O48 | 213. | RY*(1) C 4      | 0.99      | 2.86    | 0.048  |
| 32. | BD | (3) | C10-     | O48 | 219. | RY*(7) C 4      | 1.20      | 7.70    | 0.086  |
| 32. | BD | (3) | C10-     | O48 | 263. | RY*(6) C 7      | 0.53      | 5.27    | 0.047  |
| 32. | BD | (3) | C10-     | O48 | 303. | RY*(1) C10      | 8.89      | 2.98    | 0.146  |
| 32. | BD | (3) | C10-     | O48 | 305. | RY*(3) C10      | 2.22      | 3.72    | 0.081  |
| 32. | BD | (3) | C10-     | O48 | 309. | RY*(7) C10      | 3.96      | 7.49    | 0.154  |
| 32. | BD | (3) | C10-     | O48 | 310. | RY*(8) C10      | 0.92      | 4.36    | 0.057  |
| 32. | BD | (3) | C10-     | O48 | 311. | RY*(9) C10      | 0.80      | 5.61    | 0.060  |
| 32. | BD | (3) | C10-     | O48 | 316. | RY*(14) C10     | 0.71      | 46.70   | 0.163  |
| 32. | BD | (3) | C10-     | O48 | 317. | RY*(15) C10     | 0.95      | 26.16   | 0.141  |
| 32. | BD | (3) | C10-     | O48 | 321. | RY*(4) C11      | 0.64      | 3.32    | 0.041  |
| 32. | BD | (3) | C10-     | O48 | 383. | RY*(6) C15      | 2.11      | 4.30    | 0.085  |
| 32. | BD | (3) | C10-     | O48 | 646. | RY*(4) O44      | 0.80      | 1.80    | 0.034  |
| 32. | BD | (3) | C10-     | O48 | 648. | RY*(6) O44      | 0.54      | 3.55    | 0.039  |
| 32. | BD | (3) | C10-     | O48 | 705. | RY*(3) O48      | 1.27      | 3.05    | 0.056  |
| 32. | BD | (3) | C10-     | O48 | 706. | RY*(4) O48      | 0.95      | 1.70    | 0.036  |
| 32. | BD | (3) | C10-     | O48 | 767. | RY*(1)Ru52      | 9.90      | 7.85    | 0.249  |
| 32. | BD | (3) | C10-     | O48 | 768. | RY*(2)Ru52      | 10.66     | 4.58    | 0.197  |
| 32. | BD | (3) | C10-     | O48 | 769. | RY*(3)Ru52      | 4.43      | 2.65    | 0.097  |
| 32. | BD | (3) | C10-     | O48 | 770. | RY*(4)Ru52      | 1.28      | 3.35    | 0.059  |
| 32. | BD | (3) | C10-     | O48 | 771. | RY*(5)Ru52      | 13.67     | 7.93    | 0.294  |
| 32. | BD | (3) | C10-     | O48 | 772. | RY*(6)Ru52      | 2.44      | 5.44    | 0.103  |
| 32. | BD | (3) | C10-     | O48 | 773. | RY*(7)Ru52      | 7.76      | 9.28    | 0.240  |
| 32. | BD | (3) | C10-     | O48 | 774. | RY*(8)Ru52      | 1.25      | 4.68    | 0.068  |
| 32. | BD | (3) | C10-     | O48 | 775. | RY*(9)Ru52      | 9.01      | 11.06   | 0.282  |
| 32. | BD | (3) | C10-     | O48 | 776. | RY*(10)Ru52     | 5.09      | 9.40    | 0.195  |
| 32. | BD | (3) | C10-     | O48 | 778. | RY*(12)Ru52     | 1.81      | 6.95    | 0.100  |
| 32. | BD | (3) | C10-     | O48 | 779. | RY*(13)Ru52     | 3.12      | 15.78   | 0.198  |
| 32. | BD | (3) | C10-     | O48 | 780. | RY*(14)Ru52     | 0.59      | 9.84    | 0.068  |
| 32. | BD | (3) | C10-     | O48 | 781. | RY*(15)Ru52     | 1.70      | 8.59    | 0.108  |
| 32. | BD | (3) | C10-     | O48 | 783. | RY*(17)Ru52     | 7.74      | 13.52   | 0.289  |
| 32. | BD | (3) | C10-     | O48 | 784. | RY*(18)Ru52     | 2.15      | 7.00    | 0.110  |
| 32. | BD | (3) | C10-     | O48 | 785. | RY*(19)Ru52     | 3.33      | 8.16    | 0.147  |
| 32. | BD | (3) | C10-     | O48 | 789. | RY*(23)Ru52     | 9.90      | 11.48   | 0.301  |
| 32. | BD | (3) | C10-     | O48 | 790. | RY*(24)Ru52     | 7.9013605 | 98      | 9.269  |
| 32. | BD | (3) | C10-     | O48 | 791. | RY*(25)Ru52     | 4.0533395 | 42      | 10.401 |
| 32. | BD | (3) | C10-     | O48 | 792. | RY*(26)Ru52     | 9.34      | 1160.44 | 2.943  |
| 32. | BD | (3) | C10-     | O48 | 795. | RY*(29)Ru52     | 9.76      | 53.98   | 0.649  |
| 32. | BD | (3) | C10-     | O48 | 796. | RY*(30)Ru52     | 6.69      | 19.64   | 0.324  |
| 32. | BD | (3) | C10-     | O48 | 799. | RY*(33)Ru52     | 1.86      | 89.25   | 0.364  |
| 32. | BD | (3) | C10-     | O48 | 800. | RY*(34)Ru52     | 0.76      | 50.61   | 0.176  |
| 32. | BD | (3) | C10-     | O48 | 804. | RY*(38)Ru52     | 10.37     | 259.34  | 1.466  |
| 32. | BD | (3) | C10-     | O48 | 807. | RY*(41)Ru52     | 0.72      | 82.04   | 0.217  |
| 33. | BD | (1) | C10-Ru52 |     | 216. | RY*(4) C 4      | 2.72      | 2.71    | 0.078  |
| 33. | BD | (1) | C10-Ru52 |     | 218. | RY*(6) C 4      | 0.79      | 2.64    | 0.042  |
| 33. | BD | (1) | C10-Ru52 |     | 219. | RY*(7) C 4      | 0.90      | 7.19    | 0.073  |
| 33. | BD | (1) | C10-Ru52 |     | 303. | RY*(1) C10      | 0.96      | 2.47    | 0.044  |
| 33. | BD | (1) | C10-Ru52 |     | 317. | RY*(15) C10     | 0.51      | 25.65   | 0.104  |
| 33. | BD | (1) | C10-Ru52 |     | 318. | RY*(1) C11      | 0.97      | 1.60    | 0.036  |

|     |    |     |           |      |                  |              |       |       |
|-----|----|-----|-----------|------|------------------|--------------|-------|-------|
| 33. | BD | (1) | C10-Ru52  | 705. | RY*(3) O48       | 1.92         | 2.53  | 0.063 |
| 33. | BD | (1) | C10-Ru52  | 706. | RY*(4) O48       | 0.60         | 1.18  | 0.024 |
| 33. | BD | (1) | C10-Ru52  | 740. | RY*(4) N50       | 0.50         | 5.62  | 0.048 |
| 33. | BD | (1) | C10-Ru52  | 767. | RY*(1) Ru52      | 0.58         | 7.33  | 0.059 |
| 33. | BD | (1) | C10-Ru52  | 795. | RY*(29) Ru52     | 0.63         | 53.47 | 0.167 |
| 33. | BD | (1) | C10-Ru52  | 873. | BD*(2) C 4- O44  | 1.75         | 0.52  | 0.028 |
| 33. | BD | (1) | C10-Ru52  | 874. | BD*(3) C 4- O44  | 2.07         | 1.14  | 0.044 |
| 33. | BD | (1) | C10-Ru52  | 875. | BD*(1) C 4- Ru52 | 12.29        | 0.64  | 0.084 |
| 33. | BD | (1) | C10-Ru52  | 876. | BD*(1) C10- Ru52 | 1.06         | 0.64  | 0.025 |
| 33. | BD | (1) | C10-Ru52  | 879. | BD*(3) C10- O48  | 0.67         | 1.10  | 0.024 |
| 33. | BD | (1) | C10-Ru52  | 891. | BD*(1) C 9- C11  | 2.06         | 1.03  | 0.041 |
| 33. | BD | (1) | C10-Ru52  | 894. | BD*(1) C11- Ru52 | 13.24        | 0.54  | 0.080 |
| 34. | BD | (1) | C11- C15  | 219. | RY*(7) C 4       | 0.60         | 7.28  | 0.059 |
| 34. | BD | (1) | C11- C15  | 288. | RY*(1) C 9       | 1.47         | 2.00  | 0.048 |
| 34. | BD | (1) | C11- C15  | 290. | RY*(3) C 9       | 1.09         | 2.41  | 0.046 |
| 34. | BD | (1) | C11- C15  | 303. | RY*(1) C10       | 0.53         | 2.55  | 0.033 |
| 34. | BD | (1) | C11- C15  | 318. | RY*(1) C11       | 0.52         | 1.69  | 0.027 |
| 34. | BD | (1) | C11- C15  | 320. | RY*(3) C11       | 0.69         | 1.65  | 0.030 |
| 34. | BD | (1) | C11- C15  | 321. | RY*(4) C11       | 2.38         | 2.89  | 0.074 |
| 34. | BD | (1) | C11- C15  | 326. | RY*(9) C11       | 0.66         | 13.42 | 0.085 |
| 34. | BD | (1) | C11- C15  | 380. | RY*(3) C15       | 0.61         | 2.35  | 0.034 |
| 34. | BD | (1) | C11- C15  | 383. | RY*(6) C15       | 1.62         | 3.87  | 0.071 |
| 34. | BD | (1) | C11- C15  | 384. | RY*(7) C15       | 0.56         | 8.60  | 0.062 |
| 34. | BD | (1) | C11- C15  | 390. | RY*(13) C15      | 0.59         | 40.95 | 0.139 |
| 34. | BD | (1) | C11- C15  | 392. | RY*(15) C15      | 0.74         | 27.28 | 0.128 |
| 34. | BD | (1) | C11- C15  | 440. | RY*(3) C19       | 1.41         | 2.50  | 0.053 |
| 34. | BD | (1) | C11- C15  | 589. | RY*(2) H33       | 0.54         | 2.52  | 0.033 |
| 34. | BD | (1) | C11- C15  | 767. | RY*(1) Ru52      | 2.41         | 7.42  | 0.120 |
| 34. | BD | (1) | C11- C15  | 768. | RY*(2) Ru52      | 2.67         | 4.15  | 0.094 |
| 34. | BD | (1) | C11- C15  | 769. | RY*(3) Ru52      | 1.75         | 2.22  | 0.056 |
| 34. | BD | (1) | C11- C15  | 770. | RY*(4) Ru52      | 3.64         | 2.92  | 0.092 |
| 34. | BD | (1) | C11- C15  | 771. | RY*(5) Ru52      | 2.76         | 7.50  | 0.129 |
| 34. | BD | (1) | C11- C15  | 772. | RY*(6) Ru52      | 0.80         | 5.01  | 0.057 |
| 34. | BD | (1) | C11- C15  | 773. | RY*(7) Ru52      | 3.03         | 8.85  | 0.147 |
| 34. | BD | (1) | C11- C15  | 774. | RY*(8) Ru52      | 1.70         | 4.25  | 0.076 |
| 34. | BD | (1) | C11- C15  | 775. | RY*(9) Ru52      | 1.37         | 10.63 | 0.108 |
| 34. | BD | (1) | C11- C15  | 777. | RY*(11) Ru52     | 0.81         | 5.60  | 0.061 |
| 34. | BD | (1) | C11- C15  | 778. | RY*(12) Ru52     | 1.90         | 6.52  | 0.100 |
| 34. | BD | (1) | C11- C15  | 779. | RY*(13) Ru52     | 1.67         | 15.35 | 0.143 |
| 34. | BD | (1) | C11- C15  | 780. | RY*(14) Ru52     | 1.05         | 9.41  | 0.089 |
| 34. | BD | (1) | C11- C15  | 781. | RY*(15) Ru52     | 1.87         | 8.16  | 0.111 |
| 34. | BD | (1) | C11- C15  | 783. | RY*(17) Ru52     | 2.44         | 13.09 | 0.160 |
| 34. | BD | (1) | C11- C15  | 784. | RY*(18) Ru52     | 0.51         | 6.57  | 0.052 |
| 34. | BD | (1) | C11- C15  | 785. | RY*(19) Ru52     | 1.51         | 7.74  | 0.097 |
| 34. | BD | (1) | C11- C15  | 788. | RY*(22) Ru52     | 0.51         | 10.35 | 0.065 |
| 34. | BD | (1) | C11- C15  | 789. | RY*(23) Ru52     | 2.19         | 11.05 | 0.140 |
| 34. | BD | (1) | C11- C15  | 790. | RY*(24) Ru52     | 2.1713605.55 | 4.873 |       |
| 34. | BD | (1) | C11- C15  | 791. | RY*(25) Ru52     | 1.1733394.99 | 5.605 |       |
| 34. | BD | (1) | C11- C15  | 792. | RY*(26) Ru52     | 2.57 1160.01 | 1.550 |       |
| 34. | BD | (1) | C11- C15  | 793. | RY*(27) Ru52     | 0.77 50.89   | 0.178 |       |
| 34. | BD | (1) | C11- C15  | 794. | RY*(28) Ru52     | 0.52 186.75  | 0.280 |       |
| 34. | BD | (1) | C11- C15  | 795. | RY*(29) Ru52     | 2.46 53.55   | 0.326 |       |
| 34. | BD | (1) | C11- C15  | 796. | RY*(30) Ru52     | 2.11 19.21   | 0.180 |       |
| 34. | BD | (1) | C11- C15  | 804. | RY*(38) Ru52     | 2.87 258.92  | 0.773 |       |
| 34. | BD | (1) | C11- C15  | 888. | BD*(1) C 7- C 9  | 3.60         | 1.03  | 0.055 |
| 34. | BD | (1) | C11- C15  | 891. | BD*(1) C 9- C11  | 0.69         | 1.11  | 0.025 |
| 34. | BD | (1) | C11- C15  | 900. | BD*(1) C19- H35  | 2.21         | 1.01  | 0.042 |
| 34. | BD | (1) | C11- C15  | 901. | BD*(1) C15- C19  | 1.15         | 1.09  | 0.032 |
| 34. | BD | (1) | C11- C15  | 902. | BD*(1) C15- H33  | 0.67         | 1.02  | 0.023 |
| 35. | BD | (2) | C11- C15  | 289. | RY*(2) C 9       | 1.81         | 0.75  | 0.037 |
| 35. | BD | (2) | C11- C15  | 319. | RY*(2) C11       | 0.68         | 0.86  | 0.024 |
| 35. | BD | (2) | C11- C15  | 439. | RY*(2) C19       | 1.43         | 0.72  | 0.032 |
| 35. | BD | (2) | C11- C15  | 875. | BD*(1) C 4- Ru52 | 0.83         | 0.32  | 0.015 |
| 35. | BD | (2) | C11- C15  | 890. | BD*(2) C 9- C13  | 14.60        | 0.22  | 0.050 |
| 35. | BD | (2) | C11- C15  | 898. | BD*(2) C17- C19  | 17.96        | 0.21  | 0.056 |
| 36. | BD | (1) | C11- Ru52 | 216. | RY*(4) C 4       | 0.72         | 2.54  | 0.040 |
| 36. | BD | (1) | C11- Ru52 | 288. | RY*(1) C 9       | 0.79         | 1.74  | 0.034 |
| 36. | BD | (1) | C11- Ru52 | 304. | RY*(2) C10       | 0.71         | 1.33  | 0.028 |
| 36. | BD | (1) | C11- Ru52 | 305. | RY*(3) C10       | 1.89         | 3.04  | 0.070 |
| 36. | BD | (1) | C11- Ru52 | 321. | RY*(4) C11       | 0.55         | 2.64  | 0.035 |
| 36. | BD | (1) | C11- Ru52 | 378. | RY*(1) C15       | 0.84         | 2.00  | 0.038 |
| 36. | BD | (1) | C11- Ru52 | 737. | RY*(1) N50       | 3.13         | 2.20  | 0.076 |
| 36. | BD | (1) | C11- Ru52 | 778. | RY*(12) Ru52     | 0.71         | 6.26  | 0.062 |
| 36. | BD | (1) | C11- Ru52 | 870. | BD*(1) C 5- C 7  | 0.64         | 0.83  | 0.021 |
| 36. | BD | (1) | C11- Ru52 | 872. | BD*(1) C 4- O44  | 1.29         | 0.35  | 0.020 |
| 36. | BD | (1) | C11- Ru52 | 874. | BD*(3) C 4- O44  | 0.88         | 0.97  | 0.027 |
| 36. | BD | (1) | C11- Ru52 | 875. | BD*(1) C 4- Ru52 | 17.37        | 0.47  | 0.084 |
| 36. | BD | (1) | C11- Ru52 | 876. | BD*(1) C10- Ru52 | 18.65        | 0.48  | 0.088 |
| 36. | BD | (1) | C11- Ru52 | 878. | BD*(2) C10- O48  | 0.91         | 0.35  | 0.016 |
| 36. | BD | (1) | C11- Ru52 | 879. | BD*(3) C10- O48  | 1.67         | 0.93  | 0.036 |
| 36. | BD | (1) | C11- Ru52 | 884. | BD*(1) C 2- N50  | 1.71         | 0.80  | 0.034 |
| 36. | BD | (1) | C11- Ru52 | 888. | BD*(1) C 7- C 9  | 0.57         | 0.78  | 0.019 |
| 36. | BD | (1) | C11- Ru52 | 889. | BD*(1) C 9- C13  | 6.38         | 0.84  | 0.067 |
| 36. | BD | (1) | C11- Ru52 | 894. | BD*(1) C11- Ru52 | 3.33         | 0.37  | 0.033 |
| 36. | BD | (1) | C11- Ru52 | 901. | BD*(1) C15- C19  | 5.63         | 0.84  | 0.063 |
| 36. | BD | (1) | C11- Ru52 | 902. | BD*(1) C15- H33  | 0.86         | 0.76  | 0.024 |
| 41. | BD | (1) | C13- C17  | 288. | RY*(1) C 9       | 0.71         | 2.01  | 0.034 |
| 41. | BD | (1) | C13- C17  | 440. | RY*(3) C19       | 1.01         | 2.51  | 0.045 |
| 41. | BD | (1) | C13- C17  | 888. | BD*(1) C 7- C 9  | 3.42         | 1.05  | 0.054 |
| 41. | BD | (1) | C13- C17  | 889. | BD*(1) C 9- C13  | 1.25         | 1.11  | 0.033 |
| 41. | BD | (1) | C13- C17  | 897. | BD*(1) C17- C19  | 0.87         | 1.10  | 0.028 |
| 41. | BD | (1) | C13- C17  | 900. | BD*(1) C19- H35  | 2.34         | 1.03  | 0.044 |
| 42. | BD | (1) | C13- H30  | 288. | RY*(1) C 9       | 1.15         | 1.85  | 0.041 |
| 42. | BD | (1) | C13- H30  | 408. | RY*(1) C17       | 0.96         | 2.16  | 0.041 |
| 42. | BD | (1) | C13- H30  | 891. | BD*(1) C 9- C11  | 4.92         | 0.96  | 0.062 |
| 42. | BD | (1) | C13- H30  | 897. | BD*(1) C17- C19  | 3.57         | 0.94  | 0.052 |
| 45. | BD | (1) | C15- C19  | 318. | RY*(1) C11       | 1.05         | 1.69  | 0.038 |
| 45. | BD | (1) | C15- C19  | 410. | RY*(3) C17       | 0.96         | 2.54  | 0.044 |
| 45. | BD | (1) | C15- C19  | 894. | BD*(1) C11- Ru52 | 3.73         | 0.63  | 0.047 |
| 45. | BD | (1) | C15- C19  | 895. | BD*(1) C11- C15  | 1.44         | 1.13  | 0.036 |
| 45. | BD | (1) | C15- C19  | 897. | BD*(1) C17- C19  | 0.77         | 1.09  | 0.026 |
| 45. | BD | (1) | C15- C19  | 899. | BD*(1) C17- H34  | 2.36         | 1.02  | 0.044 |
| 46. | BD | (1) | C15- H33  | 318. | RY*(1) C11       | 1.53         | 1.52  | 0.043 |
| 46. | BD | (1) | C15- H33  | 438. | RY*(1) C19       | 0.96         | 2.04  | 0.040 |
| 46. | BD | (1) | C15- H33  | 444. | RY*(7) C19       | 0.53         | 6.60  | 0.053 |
| 46. | BD | (1) | C15- H33  | 891. | BD*(1) C 9- C11  | 3.77         | 0.95  | 0.053 |
| 46. | BD | (1) | C15- H33  | 897. | BD*(1) C17- C19  | 3.71         | 0.92  | 0.052 |
| 50. | BD | (1) | C17- C19  | 350. | RY*(3) C13       | 0.98         | 2.38  | 0.043 |
| 50. | BD | (1) | C17- C19  | 381. | RY*(4) C15       | 0.63         | 1.64  | 0.029 |
| 50. | BD | (1) | C17- C19  | 892. | BD*(1) C13- C17  | 0.95         | 1.11  | 0.029 |
| 50. | BD | (1) | C17- C19  | 893. | BD*(1) C13- H30  | 2.51         | 1.01  | 0.045 |
| 50. | BD | (1) | C17- C19  | 901. | BD*(1) C15- C19  | 0.81         | 1.10  | 0.027 |
| 50. | BD | (1) | C17- C19  | 902. | BD*(1) C15- H33  | 2.18         | 1.02  | 0.042 |
| 51. | BD | (2) | C17- C19  | 349. | RY*(2) C13       | 0.58         | 0.75  | 0.021 |
| 51. | BD | (2) | C17- C19  | 379. | RY*(2) C15       | 0.71         | 0.71  | 0.022 |
| 51. | BD | (2) | C17- C19  | 890. | BD*(2) C 9- C13  | 16.14        | 0.23  | 0.055 |

|      |    |     |      |     |      |     |      |      |      |       |         |       |
|------|----|-----|------|-----|------|-----|------|------|------|-------|---------|-------|
| 51.  | BD | (2) | C17- | C19 | 896. | BD* | (2)  | C11- | C15  | 12.40 | 0.24    | 0.049 |
| 52.  | BD | (1) | C17- | H34 | 348. | RY* | (1)  | C13  |      | 0.97  | 2.01    | 0.040 |
| 52.  | BD | (1) | C17- | H34 | 438. | RY* | (1)  | C19  |      | 0.97  | 2.05    | 0.040 |
| 52.  | BD | (1) | C17- | H34 | 889. | BD* | (1)  | C 9- | C13  | 4.03  | 0.95    | 0.055 |
| 52.  | BD | (1) | C17- | H34 | 901. | BD* | (1)  | C15- | C19  | 3.74  | 0.94    | 0.053 |
| 56.  | BD | (1) | C19- | H35 | 378. | RY* | (1)  | C15  |      | 0.92  | 2.09    | 0.039 |
| 56.  | BD | (1) | C19- | H35 | 408. | RY* | (1)  | C17  |      | 0.93  | 2.15    | 0.040 |
| 56.  | BD | (1) | C19- | H35 | 892. | BD* | (1)  | C13- | C17  | 3.65  | 0.94    | 0.053 |
| 56.  | BD | (1) | C19- | H35 | 895. | BD* | (1)  | C11- | C15  | 4.78  | 0.96    | 0.061 |
| 73.  | CR | (1) | C 1  |     | 185. | RY* | (3)  | C 2  |      | 0.67  | 11.63   | 0.079 |
| 73.  | CR | (1) | C 1  |     | 186. | RY* | (4)  | C 2  |      | 0.80  | 11.04   | 0.084 |
| 73.  | CR | (1) | C 1  |     | 199. | RY* | (2)  | C 3  |      | 1.02  | 11.50   | 0.097 |
| 73.  | CR | (1) | C 1  |     | 884. | BD* | (1)  | C 2- | N50  | 0.69  | 10.23   | 0.075 |
| 74.  | CR | (1) | C 2  |     | 168. | RY* | (1)  | C 1  |      | 0.71  | 11.48   | 0.080 |
| 74.  | CR | (1) | C 2  |     | 170. | RY* | (3)  | C 1  |      | 0.65  | 11.69   | 0.078 |
| 74.  | CR | (1) | C 2  |     | 886. | BD* | (1)  | C 7- | N50  | 1.04  | 10.25   | 0.093 |
| 75.  | CR | (1) | C 3  |     | 170. | RY* | (3)  | C 1  |      | 1.36  | 11.67   | 0.112 |
| 75.  | CR | (1) | C 3  |     | 230. | RY* | (3)  | C 5  |      | 1.34  | 11.45   | 0.111 |
| 76.  | CR | (1) | C 4  |     | 646. | RY* | (4)  | O44  |      | 0.89  | 10.64   | 0.087 |
| 77.  | CR | (1) | C 5  |     | 199. | RY* | (2)  | C 3  |      | 1.18  | 11.51   | 0.104 |
| 77.  | CR | (1) | C 5  |     | 260. | RY* | (3)  | C 7  |      | 1.15  | 11.73   | 0.104 |
| 77.  | CR | (1) | C 5  |     | 886. | BD* | (1)  | C 7- | N50  | 0.68  | 10.21   | 0.075 |
| 77.  | CR | (1) | C 5  |     | 888. | BD* | (1)  | C 7- | C 9  | 0.90  | 10.21   | 0.086 |
| 79.  | CR | (1) | C 7  |     | 228. | RY* | (1)  | C 5  |      | 0.62  | 11.37   | 0.075 |
| 79.  | CR | (1) | C 7  |     | 288. | RY* | (1)  | C 9  |      | 0.54  | 11.21   | 0.069 |
| 79.  | CR | (1) | C 7  |     | 739. | RY* | (3)  | N50  |      | 0.51  | 11.95   | 0.070 |
| 79.  | CR | (1) | C 7  |     | 884. | BD* | (1)  | C 2- | N50  | 0.91  | 10.27   | 0.087 |
| 79.  | CR | (1) | C 7  |     | 889. | BD* | (1)  | C 9- | C13  | 0.61  | 10.32   | 0.072 |
| 79.  | CR | (1) | C 7  |     | 891. | BD* | (1)  | C 9- | C11  | 0.60  | 10.33   | 0.071 |
| 81.  | CR | (1) | C 9  |     | 258. | RY* | (1)  | C 7  |      | 0.56  | 11.30   | 0.071 |
| 81.  | CR | (1) | C 9  |     | 318. | RY* | (1)  | C11  |      | 0.51  | 10.84   | 0.067 |
| 81.  | CR | (1) | C 9  |     | 320. | RY* | (3)  | C11  |      | 0.73  | 10.81   | 0.079 |
| 81.  | CR | (1) | C 9  |     | 348. | RY* | (1)  | C13  |      | 0.53  | 11.32   | 0.069 |
| 81.  | CR | (1) | C 9  |     | 350. | RY* | (3)  | C13  |      | 0.59  | 11.54   | 0.074 |
| 81.  | CR | (1) | C 9  |     | 870. | BD* | (1)  | C 5- | C 7  | 0.77  | 10.24   | 0.080 |
| 81.  | CR | (1) | C 9  |     | 886. | BD* | (1)  | C 7- | N50  | 0.51  | 10.20   | 0.065 |
| 81.  | CR | (1) | C 9  |     | 894. | BD* | (1)  | C11- | Ru52 | 0.63  | 9.78    | 0.076 |
| 82.  | CR | (1) | C10  |     | 706. | RY* | (4)  | O48  |      | 0.93  | 10.54   | 0.088 |
| 83.  | CR | (1) | C11  |     | 288. | RY* | (1)  | C 9  |      | 0.55  | 11.16   | 0.070 |
| 83.  | CR | (1) | C11  |     | 290. | RY* | (3)  | C 9  |      | 0.87  | 11.58   | 0.090 |
| 83.  | CR | (1) | C11  |     | 378. | RY* | (1)  | C15  |      | 0.52  | 11.42   | 0.069 |
| 83.  | CR | (1) | C11  |     | 380. | RY* | (3)  | C15  |      | 0.98  | 11.52   | 0.095 |
| 83.  | CR | (1) | C11  |     | 888. | BD* | (1)  | C 7- | C 9  | 0.66  | 10.20   | 0.074 |
| 83.  | CR | (1) | C11  |     | 889. | BD* | (1)  | C 9- | C13  | 0.72  | 10.26   | 0.077 |
| 83.  | CR | (1) | C11  |     | 894. | BD* | (1)  | C11- | Ru52 | 0.55  | 9.79    | 0.071 |
| 83.  | CR | (1) | C11  |     | 901. | BD* | (1)  | C15- | C19  | 0.58  | 10.26   | 0.070 |
| 85.  | CR | (1) | C13  |     | 290. | RY* | (3)  | C 9  |      | 0.93  | 11.57   | 0.093 |
| 85.  | CR | (1) | C13  |     | 410. | RY* | (3)  | C17  |      | 1.26  | 11.69   | 0.108 |
| 85.  | CR | (1) | C13  |     | 888. | BD* | (1)  | C 7- | C 9  | 0.77  | 10.19   | 0.080 |
| 85.  | CR | (1) | C13  |     | 891. | BD* | (1)  | C 9- | C11  | 0.88  | 10.27   | 0.086 |
| 87.  | CR | (1) | C15  |     | 320. | RY* | (3)  | C11  |      | 1.00  | 10.80   | 0.093 |
| 87.  | CR | (1) | C15  |     | 440. | RY* | (3)  | C19  |      | 0.94  | 11.64   | 0.094 |
| 87.  | CR | (1) | C15  |     | 894. | BD* | (1)  | C11- | Ru52 | 0.83  | 9.77    | 0.087 |
| 89.  | CR | (1) | C17  |     | 350. | RY* | (3)  | C13  |      | 1.30  | 11.53   | 0.109 |
| 89.  | CR | (1) | C17  |     | 440. | RY* | (3)  | C19  |      | 1.25  | 11.65   | 0.108 |
| 89.  | CR | (1) | C17  |     | 889. | BD* | (1)  | C 9- | C13  | 0.57  | 10.25   | 0.069 |
| 91.  | CR | (1) | C19  |     | 380. | RY* | (3)  | C15  |      | 0.87  | 11.51   | 0.089 |
| 91.  | CR | (1) | C19  |     | 381. | RY* | (4)  | C15  |      | 0.59  | 10.79   | 0.071 |
| 91.  | CR | (1) | C19  |     | 410. | RY* | (3)  | C17  |      | 0.85  | 11.69   | 0.089 |
| 91.  | CR | (1) | C19  |     | 895. | BD* | (1)  | C11- | C15  | 0.84  | 10.27   | 0.083 |
| 99.  | CR | (1) | O44  |     | 213. | RY* | (1)  | C 4  |      | 4.86  | 20.39   | 0.282 |
| 99.  | CR | (1) | O44  |     | 875. | BD* | (1)  | C 4- | Ru52 | 0.65  | 18.68   | 0.107 |
| 103. | CR | (1) | O48  |     | 303. | RY* | (1)  | C10  |      | 4.91  | 20.52   | 0.284 |
| 103. | CR | (1) | O48  |     | 876. | BD* | (1)  | C10- | Ru52 | 0.62  | 18.70   | 0.105 |
| 109. | CR | (1) | N50  |     | 183. | RY* | (1)  | C 2  |      | 0.95  | 15.43   | 0.108 |
| 109. | CR | (1) | N50  |     | 185. | RY* | (3)  | C 2  |      | 0.95  | 15.72   | 0.109 |
| 109. | CR | (1) | N50  |     | 258. | RY* | (1)  | C 7  |      | 0.96  | 15.41   | 0.109 |
| 109. | CR | (1) | N50  |     | 260. | RY* | (3)  | C 7  |      | 0.95  | 15.82   | 0.109 |
| 109. | CR | (1) | N50  |     | 876. | BD* | (1)  | C10- | Ru52 | 4.41  | 14.00   | 0.242 |
| 112. | CR | (2) | Ru52 |     | 792. | RY* | (26) | Ru52 |      | 3.58  | 1285.58 | 1.915 |
| 112. | CR | (2) | Ru52 |     | 795. | RY* | (29) | Ru52 |      | 0.89  | 179.12  | 0.356 |
| 112. | CR | (2) | Ru52 |     | 804. | RY* | (38) | Ru52 |      | 2.16  | 384.48  | 0.814 |
| 112. | CR | (2) | Ru52 |     | 807. | RY* | (41) | Ru52 |      | 2.07  | 207.18  | 0.585 |
| 112. | CR | (2) | Ru52 |     | 874. | BD* | (3)  | C 4- | O44  | 1.03  | 126.79  | 0.323 |
| 112. | CR | (2) | Ru52 |     | 879. | BD* | (3)  | C10- | O48  | 1.11  | 126.76  | 0.337 |
| 113. | CR | (3) | Ru52 |     | 767. | RY* | (1)  | Ru52 |      | 1.03  | 28.70   | 0.154 |
| 113. | CR | (3) | Ru52 |     | 771. | RY* | (5)  | Ru52 |      | 0.57  | 28.78   | 0.114 |
| 113. | CR | (3) | Ru52 |     | 773. | RY* | (7)  | Ru52 |      | 1.00  | 30.13   | 0.155 |
| 113. | CR | (3) | Ru52 |     | 775. | RY* | (9)  | Ru52 |      | 1.15  | 31.91   | 0.171 |
| 113. | CR | (3) | Ru52 |     | 776. | RY* | (10) | Ru52 |      | 0.51  | 30.25   | 0.111 |
| 113. | CR | (3) | Ru52 |     | 779. | RY* | (13) | Ru52 |      | 1.01  | 36.63   | 0.171 |
| 113. | CR | (3) | Ru52 |     | 783. | RY* | (17) | Ru52 |      | 0.90  | 34.37   | 0.157 |
| 113. | CR | (3) | Ru52 |     | 789. | RY* | (23) | Ru52 |      | 0.84  | 32.33   | 0.147 |
| 113. | CR | (3) | Ru52 |     | 792. | RY* | (26) | Ru52 |      | 7.55  | 1181.29 | 2.667 |
| 113. | CR | (3) | Ru52 |     | 795. | RY* | (29) | Ru52 |      | 2.97  | 74.83   | 0.421 |
| 113. | CR | (3) | Ru52 |     | 796. | RY* | (30) | Ru52 |      | 1.01  | 40.49   | 0.181 |
| 113. | CR | (3) | Ru52 |     | 799. | RY* | (33) | Ru52 |      | 5.08  | 110.10  | 0.668 |
| 113. | CR | (3) | Ru52 |     | 804. | RY* | (38) | Ru52 |      | 4.78  | 280.19  | 1.033 |
| 113. | CR | (3) | Ru52 |     | 807. | RY* | (41) | Ru52 |      | 18.55 | 102.89  | 1.233 |
| 113. | CR | (3) | Ru52 |     | 874. | BD* | (3)  | C 4- | O44  | 3.61  | 22.50   | 0.255 |
| 113. | CR | (3) | Ru52 |     | 879. | BD* | (3)  | C10- | O48  | 3.94  | 22.47   | 0.267 |
| 113. | CR | (3) | Ru52 |     | 884. | BD* | (1)  | C 2- | N50  | 0.82  | 22.33   | 0.122 |
| 113. | CR | (3) | Ru52 |     | 886. | BD* | (1)  | C 7- | N50  | 0.62  | 22.32   | 0.106 |
| 113. | CR | (3) | Ru52 |     | 891. | BD* | (1)  | C 9- | C11  | 0.63  | 22.39   | 0.107 |
| 113. | CR | (3) | Ru52 |     | 894. | BD* | (1)  | C11- | Ru52 | 0.86  | 21.90   | 0.133 |
| 113. | CR | (3) | Ru52 |     | 895. | BD* | (1)  | C11- | C15  | 1.47  | 22.40   | 0.163 |
| 114. | CR | (4) | Ru52 |     | 213. | RY* | (1)  | C 4  |      | 3.11  | 6.42    | 0.126 |
| 114. | CR | (4) | Ru52 |     | 303. | RY* | (1)  | C10  |      | 3.62  | 6.54    | 0.137 |
| 114. | CR | (4) | Ru52 |     | 318. | RY* | (1)  | C11  |      | 0.69  | 5.68    | 0.056 |
| 114. | CR | (4) | Ru52 |     | 767. | RY* | (1)  | Ru52 |      | 0.73  | 11.41   | 0.082 |
| 114. | CR | (4) | Ru52 |     | 771. | RY* | (5)  | Ru52 |      | 0.63  | 11.49   | 0.076 |
| 114. | CR | (4) | Ru52 |     | 773. | RY* | (7)  | Ru52 |      | 0.81  | 12.84   | 0.091 |
| 114. | CR | (4) | Ru52 |     | 775. | RY* | (9)  | Ru52 |      | 0.84  | 14.62   | 0.099 |
| 114. | CR | (4) | Ru52 |     | 779. | RY* | (13) | Ru52 |      | 0.85  | 19.34   | 0.115 |
| 114. | CR | (4) | Ru52 |     | 783. | RY* | (17) | Ru52 |      | 0.83  | 17.08   | 0.106 |
| 114. | CR | (4) | Ru52 |     | 789. | RY* | (23) | Ru52 |      | 0.90  | 15.05   | 0.104 |
| 114. | CR | (4) | Ru52 |     | 792. | RY* | (26) | Ru52 |      | 1.87  | 1164.00 | 1.322 |
| 114. | CR | (4) | Ru52 |     | 795. | RY* | (29) | Ru52 |      | 1.33  | 57.54   | 0.247 |
| 114. | CR | (4) | Ru52 |     | 796. | RY* | (30) | Ru52 |      | 0.67  | 23.20   | 0.112 |
| 114. | CR | (4) | Ru52 |     | 799. | RY* | (33) | Ru52 |      | 0.65  | 92.81   | 0.220 |
| 114. | CR | (4) | Ru52 |     | 804. | RY* | (38) | Ru52 |      | 1.51  | 262.91  | 0.564 |
| 114. | CR | (4) | Ru52 |     | 807. | RY* | (41) | Ru52 |      | 1.74  | 85.60   | 0.345 |
| 114. | CR | (4) | Ru52 |     | 874. | BD* | (3)  | C 4- | O44  | 10.37 | 5.21    | 0.208 |
| 114. | CR | (4) | Ru52 |     | 877. | BD* | (1)  | C10- | O48  | 0.55  | 4.62    | 0.047 |
| 114. | CR | (4) | Ru52 |     | 879. | BD* | (3)  | C10- | O48  | 11.06 | 5.18    | 0.214 |
| 114. | CR | (4) | Ru52 |     | 884. | BD* | (1)  | C 2- | N50  | 2.45  | 5.05    | 0.100 |

|                       |    |               |      |                  |       |         |       |
|-----------------------|----|---------------|------|------------------|-------|---------|-------|
| 114.                  | CR | ( 4)Ru52      | 886. | BD*( 1) C 7- N50 | 1.89  | 5.03    | 0.088 |
| 114.                  | CR | ( 4)Ru52      | 891. | BD*( 1) C 9- C11 | 1.54  | 5.10    | 0.080 |
| 114.                  | CR | ( 4)Ru52      | 894. | BD*( 1) C11-Ru52 | 2.65  | 4.62    | 0.106 |
| 114.                  | CR | ( 4)Ru52      | 895. | BD*( 1) C11- C15 | 4.00  | 5.11    | 0.128 |
| 117.                  | CR | ( 7)Ru52      | 876. | BD*( 1) C10-Ru52 | 3.18  | 1.95    | 0.077 |
| 117.                  | CR | ( 7)Ru52      | 877. | BD*( 1) C10- O48 | 0.55  | 1.85    | 0.030 |
| 117.                  | CR | ( 7)Ru52      | 879. | BD*( 3) C10- O48 | 1.45  | 2.41    | 0.053 |
| 117.                  | CR | ( 7)Ru52      | 884. | BD*( 1) C 2- N50 | 0.51  | 2.27    | 0.030 |
| 117.                  | CR | ( 7)Ru52      | 894. | BD*( 1) C11-Ru52 | 2.98  | 1.84    | 0.072 |
| 117.                  | CR | ( 7)Ru52      | 895. | BD*( 1) C11- C15 | 0.56  | 2.34    | 0.032 |
| 120.                  | CR | (10)Ru52      | 874. | BD*( 3) C 4- O44 | 1.37  | 2.45    | 0.052 |
| 120.                  | CR | (10)Ru52      | 875. | BD*( 1) C 4-Ru52 | 4.25  | 1.95    | 0.088 |
| 120.                  | CR | (10)Ru52      | 876. | BD*( 1) C10-Ru52 | 1.37  | 1.95    | 0.050 |
| 120.                  | CR | (10)Ru52      | 878. | BD*( 2) C10- O48 | 1.04  | 1.83    | 0.041 |
| 120.                  | CR | (10)Ru52      | 894. | BD*( 1) C11-Ru52 | 2.27  | 1.85    | 0.063 |
| 123.                  | CR | (13)Ru52      | 874. | BD*( 3) C 4- O44 | 1.25  | 2.44    | 0.049 |
| 123.                  | CR | (13)Ru52      | 875. | BD*( 1) C 4-Ru52 | 2.23  | 1.94    | 0.064 |
| 123.                  | CR | (13)Ru52      | 876. | BD*( 1) C10-Ru52 | 1.62  | 1.95    | 0.055 |
| 123.                  | CR | (13)Ru52      | 879. | BD*( 3) C10- O48 | 0.91  | 2.41    | 0.042 |
| 123.                  | CR | (13)Ru52      | 894. | BD*( 1) C11-Ru52 | 2.44  | 1.84    | 0.065 |
| 148.                  | LP | ( 1) O44      | 213. | RY*( 1) C 4      | 8.64  | 2.49    | 0.131 |
| 148.                  | LP | ( 1) O44      | 220. | RY*( 8) C 4      | 1.14  | 3.29    | 0.055 |
| 148.                  | LP | ( 1) O44      | 875. | BD*( 1) C 4-Ru52 | 3.28  | 0.78    | 0.049 |
| 154.                  | LP | ( 1) O48      | 303. | RY*( 1) C10      | 8.70  | 2.61    | 0.135 |
| 154.                  | LP | ( 1) O48      | 310. | RY*( 8) C10      | 2.14  | 4.00    | 0.083 |
| 154.                  | LP | ( 1) O48      | 876. | BD*( 1) C10-Ru52 | 3.17  | 0.79    | 0.049 |
| 159.                  | LP | ( 1) N50      | 183. | RY*( 1) C 2      | 2.16  | 1.92    | 0.063 |
| 159.                  | LP | ( 1) N50      | 185. | RY*( 3) C 2      | 0.65  | 2.20    | 0.037 |
| 159.                  | LP | ( 1) N50      | 258. | RY*( 1) C 7      | 1.99  | 1.90    | 0.060 |
| 159.                  | LP | ( 1) N50      | 260. | RY*( 3) C 7      | 1.07  | 2.31    | 0.049 |
| 159.                  | LP | ( 1) N50      | 773. | RY*( 7)Ru52      | 0.52  | 8.60    | 0.065 |
| 159.                  | LP | ( 1) N50      | 775. | RY*( 9)Ru52      | 0.58  | 10.39   | 0.076 |
| 159.                  | LP | ( 1) N50      | 870. | BD*( 1) C 5- C 7 | 7.40  | 0.83    | 0.076 |
| 159.                  | LP | ( 1) N50      | 873. | BD*( 2) C 4- O44 | 1.10  | 0.36    | 0.018 |
| 159.                  | LP | ( 1) N50      | 874. | BD*( 3) C 4- O44 | 0.87  | 0.97    | 0.028 |
| 159.                  | LP | ( 1) N50      | 876. | BD*( 1) C10-Ru52 | 72.05 | 0.48    | 0.167 |
| 159.                  | LP | ( 1) N50      | 881. | BD*( 1) C 1- C 2 | 7.06  | 0.83    | 0.074 |
| 159.                  | LP | ( 1) N50      | 885. | BD*( 1) C 2- H27 | 2.61  | 0.74    | 0.043 |
| 159.                  | LP | ( 1) N50      | 888. | BD*( 1) C 7- C 9 | 1.67  | 0.79    | 0.035 |
| 159.                  | LP | ( 1) N50      | 889. | BD*( 1) C 9- C13 | 0.53  | 0.85    | 0.021 |
| 159.                  | LP | ( 1) N50      | 894. | BD*( 1) C11-Ru52 | 1.61  | 0.38    | 0.022 |
| 159.                  | LP | ( 1) N50      | 895. | BD*( 1) C11- C15 | 1.45  | 0.87    | 0.035 |
| 161.                  | LP | ( 1) Ru52     | 306. | RY*( 4) C10      | 1.95  | 1.66    | 0.054 |
| 161.                  | LP | ( 1) Ru52     | 320. | RY*( 3) C11      | 0.58  | 1.24    | 0.025 |
| 161.                  | LP | ( 1) Ru52     | 739. | RY*( 3) N50      | 1.71  | 2.32    | 0.060 |
| 161.                  | LP | ( 1) Ru52     | 872. | BD*( 1) C 4- O44 | 4.76  | 0.19    | 0.027 |
| 161.                  | LP | ( 1) Ru52     | 877. | BD*( 1) C10- O48 | 11.98 | 0.22    | 0.046 |
| 161.                  | LP | ( 1) Ru52     | 878. | BD*( 2) C10- O48 | 9.56  | 0.20    | 0.039 |
| 161.                  | LP | ( 1) Ru52     | 884. | BD*( 1) C 2- N50 | 0.56  | 0.64    | 0.018 |
| 161.                  | LP | ( 1) Ru52     | 886. | BD*( 1) C 7- N50 | 0.51  | 0.62    | 0.017 |
| 161.                  | LP | ( 1) Ru52     | 895. | BD*( 1) C11- C15 | 0.73  | 0.71    | 0.021 |
| 161.                  | LP | ( 1) Ru52     | 896. | BD*( 2) C11- C15 | 1.71  | 0.22    | 0.018 |
| 162.                  | LP | ( 2) Ru52     | 215. | RY*( 3) C 4      | 2.02  | 2.03    | 0.062 |
| 162.                  | LP | ( 2) Ru52     | 306. | RY*( 4) C10      | 0.66  | 1.66    | 0.032 |
| 162.                  | LP | ( 2) Ru52     | 319. | RY*( 2) C11      | 1.74  | 0.85    | 0.037 |
| 162.                  | LP | ( 2) Ru52     | 872. | BD*( 1) C 4- O44 | 23.11 | 0.19    | 0.061 |
| 162.                  | LP | ( 2) Ru52     | 877. | BD*( 1) C10- O48 | 1.86  | 0.22    | 0.018 |
| 162.                  | LP | ( 2) Ru52     | 878. | BD*( 2) C10- O48 | 3.28  | 0.20    | 0.023 |
| 162.                  | LP | ( 2) Ru52     | 894. | BD*( 1) C11-Ru52 | 0.86  | 0.21    | 0.012 |
| 162.                  | LP | ( 2) Ru52     | 896. | BD*( 2) C11- C15 | 5.37  | 0.22    | 0.031 |
| 163.                  | LP | ( 3) Ru52     | 214. | RY*( 2) C 4      | 3.00  | 1.31    | 0.061 |
| 163.                  | LP | ( 3) Ru52     | 304. | RY*( 2) C10      | 2.44  | 1.18    | 0.053 |
| 163.                  | LP | ( 3) Ru52     | 738. | RY*( 2) N50      | 2.31  | 1.09    | 0.049 |
| 163.                  | LP | ( 3) Ru52     | 779. | RY*( 13)Ru52     | 0.59  | 14.95   | 0.093 |
| 163.                  | LP | ( 3) Ru52     | 873. | BD*( 2) C 4- O44 | 23.33 | 0.20    | 0.063 |
| 163.                  | LP | ( 3) Ru52     | 877. | BD*( 1) C10- O48 | 9.25  | 0.22    | 0.042 |
| 163.                  | LP | ( 3) Ru52     | 878. | BD*( 2) C10- O48 | 12.78 | 0.20    | 0.047 |
| 163.                  | LP | ( 3) Ru52     | 887. | BD*( 2) C 7- N50 | 3.53  | 0.17    | 0.023 |
| from unit 1 to unit 2 |    |               |      |                  |       |         |       |
| 6.                    | BD | ( 1) C 2- N50 | 570. | RY*( 3) H29      | 0.07  | 1.91    | 0.010 |
| 6.                    | BD | ( 1) C 2- N50 | 824. | RY*(10)Ru53      | 0.08  | 7.81    | 0.022 |
| 6.                    | BD | ( 1) C 2- N50 | 826. | RY*(12)Ru53      | 0.05  | 3.66    | 0.013 |
| 6.                    | BD | ( 1) C 2- N50 | 832. | RY*(18)Ru53      | 0.09  | 5.99    | 0.021 |
| 10.                   | BD | ( 1) C 4- O44 | 821. | RY*( 7)Ru53      | 0.09  | 3.40    | 0.015 |
| 10.                   | BD | ( 1) C 4- O44 | 824. | RY*(10)Ru53      | 0.09  | 7.42    | 0.023 |
| 10.                   | BD | ( 1) C 4- O44 | 834. | RY*(20)Ru53      | 0.07  | 11.77   | 0.025 |
| 10.                   | BD | ( 1) C 4- O44 | 859. | RY*(45)Ru53      | 0.06  | 50.96   | 0.049 |
| 12.                   | BD | ( 3) C 4- O44 | 253. | RY*(11) C 6      | 0.05  | 2.97    | 0.011 |
| 12.                   | BD | ( 3) C 4- O44 | 338. | RY*( 6) C12      | 0.08  | 3.95    | 0.016 |
| 12.                   | BD | ( 3) C 4- O44 | 453. | RY*( 1) C20      | 0.07  | 2.63    | 0.012 |
| 12.                   | BD | ( 3) C 4- O44 | 457. | RY*( 5) C20      | 0.07  | 2.84    | 0.012 |
| 12.                   | BD | ( 3) C 4- O44 | 460. | RY*( 8) C20      | 0.08  | 6.33    | 0.020 |
| 12.                   | BD | ( 3) C 4- O44 | 570. | RY*( 3) H29      | 0.30  | 2.23    | 0.023 |
| 12.                   | BD | ( 3) C 4- O44 | 752. | RY*( 1) N51      | 0.05  | 2.88    | 0.011 |
| 12.                   | BD | ( 3) C 4- O44 | 753. | RY*( 2) N51      | 0.08  | 1.94    | 0.011 |
| 12.                   | BD | ( 3) C 4- O44 | 765. | RY*(14) N51      | 0.06  | 5.56    | 0.017 |
| 12.                   | BD | ( 3) C 4- O44 | 824. | RY*(10)Ru53      | 0.23  | 8.13    | 0.039 |
| 12.                   | BD | ( 3) C 4- O44 | 826. | RY*(12)Ru53      | 0.05  | 3.98    | 0.013 |
| 12.                   | BD | ( 3) C 4- O44 | 832. | RY*(18)Ru53      | 0.10  | 6.30    | 0.022 |
| 13.                   | BD | ( 1) C 4-Ru52 | 820. | RY*( 6)Ru53      | 0.17  | 4.04    | 0.024 |
| 13.                   | BD | ( 1) C 4-Ru52 | 906. | BD*( 1) C 6-Ru53 | 0.06  | 0.64    | 0.006 |
| 22.                   | BD | ( 2) C 7- N50 | 815. | RY*( 1)Ru53      | 0.09  | 7.26    | 0.024 |
| 22.                   | BD | ( 2) C 7- N50 | 822. | RY*( 8)Ru53      | 0.06  | 4.91    | 0.016 |
| 22.                   | BD | ( 2) C 7- N50 | 836. | RY*(22)Ru53      | 0.06  | 10.86   | 0.025 |
| 22.                   | BD | ( 2) C 7- N50 | 840. | RY*(26)Ru53      | 0.07  | 5743.78 | 0.626 |
| 22.                   | BD | ( 2) C 7- N50 | 847. | RY*(33)Ru53      | 0.07  | 2777.81 | 0.130 |
| 22.                   | BD | ( 2) C 7- N50 | 852. | RY*(38)Ru53      | 0.07  | 355.97  | 0.153 |
| 22.                   | BD | ( 2) C 7- N50 | 856. | RY*(42)Ru53      | 0.06  | 3162.73 | 0.416 |
| 31.                   | BD | ( 2) C10- O48 | 334. | RY*( 2) C12      | 0.16  | 1.04    | 0.011 |
| 31.                   | BD | ( 2) C10- O48 | 336. | RY*( 4) C12      | 0.07  | 1.68    | 0.010 |
| 31.                   | BD | ( 2) C10- O48 | 347. | RY*(15) C12      | 0.05  | 26.43   | 0.033 |
| 31.                   | BD | ( 2) C10- O48 | 754. | RY*( 3) N51      | 0.05  | 2.54    | 0.010 |
| 31.                   | BD | ( 2) C10- O48 | 912. | BD*( 2) C12- C14 | 0.06  | 0.37    | 0.005 |
| 31.                   | BD | ( 3) C10- O48 | 285. | RY*(13) C 8      | 0.06  | 3.37    | 0.012 |
| 32.                   | BD | ( 3) C10- O48 | 334. | RY*( 2) C12      | 0.15  | 1.69    | 0.014 |
| 32.                   | BD | ( 3) C10- O48 | 336. | RY*( 4) C12      | 0.12  | 2.33    | 0.015 |
| 32.                   | BD | ( 3) C10- O48 | 338. | RY*( 6) C12      | 0.07  | 3.91    | 0.015 |
| 32.                   | BD | ( 3) C10- O48 | 403. | RY*(11) C16      | 0.05  | 4.11    | 0.013 |
| 32.                   | BD | ( 3) C10- O48 | 457. | RY*( 5) C20      | 0.07  | 2.79    | 0.012 |
| 32.                   | BD | ( 3) C10- O48 | 460. | RY*( 8) C20      | 0.08  | 6.29    | 0.021 |
| 32.                   | BD | ( 3) C10- O48 | 490. | RY*( 8) C22      | 0.06  | 5.04    | 0.016 |
| 32.                   | BD | ( 3) C10- O48 | 570. | RY*( 3) H29      | 0.58  | 2.19    | 0.032 |
| 32.                   | BD | ( 3) C10- O48 | 752. | RY*( 1) N51      | 0.06  | 2.84    | 0.011 |
| 32.                   | BD | ( 3) C10- O48 | 753. | RY*( 2) N51      | 0.07  | 1.90    | 0.010 |
| 32.                   | BD | ( 3) C10- O48 | 765. | RY*(14) N51      | 0.06  | 5.51    | 0.016 |

|      |    |      |          |      |                  |              |       |       |
|------|----|------|----------|------|------------------|--------------|-------|-------|
| 32.  | BD | ( 3) | C10- 048 | 818. | RY*( 4) Ru53     | 0.06         | 3.26  | 0.012 |
| 32.  | BD | ( 3) | C10- 048 | 821. | RY*( 7) Ru53     | 0.06         | 4.06  | 0.013 |
| 32.  | BD | ( 3) | C10- 048 | 824. | RY*(10) Ru53     | 0.25         | 8.09  | 0.040 |
| 32.  | BD | ( 3) | C10- 048 | 829. | RY*(15) Ru53     | 0.05         | 8.17  | 0.019 |
| 32.  | BD | ( 3) | C10- 048 | 832. | RY*(18) Ru53     | 0.15         | 6.26  | 0.028 |
| 32.  | BD | ( 3) | C10- 048 | 833. | RY*(19) Ru53     | 0.11         | 8.03  | 0.026 |
| 33.  | BD | ( 1) | C10-Ru52 | 273. | RY*( 1) C 8      | 0.08         | 2.26  | 0.012 |
| 33.  | BD | ( 1) | C10-Ru52 | 276. | RY*( 4) C 8      | 0.09         | 2.75  | 0.015 |
| 33.  | BD | ( 1) | C10-Ru52 | 278. | RY*( 6) C 8      | 0.06         | 2.58  | 0.011 |
| 33.  | BD | ( 1) | C10-Ru52 | 279. | RY*( 7) C 8      | 0.14         | 7.12  | 0.029 |
| 33.  | BD | ( 1) | C10-Ru52 | 334. | RY*( 2) C12      | 0.23         | 1.18  | 0.015 |
| 33.  | BD | ( 1) | C10-Ru52 | 428. | RY*( 6) C18      | 0.09         | 3.53  | 0.016 |
| 33.  | BD | ( 1) | C10-Ru52 | 453. | RY*( 1) C20      | 0.10         | 2.07  | 0.013 |
| 33.  | BD | ( 1) | C10-Ru52 | 661. | RY*( 4) O45      | 0.06         | 1.14  | 0.007 |
| 33.  | BD | ( 1) | C10-Ru52 | 815. | RY*( 1) Ru53     | 0.26         | 7.49  | 0.040 |
| 33.  | BD | ( 1) | C10-Ru52 | 816. | RY*( 2) Ru53     | 0.24         | 2.37  | 0.021 |
| 33.  | BD | ( 1) | C10-Ru52 | 817. | RY*( 3) Ru53     | 0.14         | 1.65  | 0.014 |
| 33.  | BD | ( 1) | C10-Ru52 | 818. | RY*( 4) Ru53     | 0.07         | 2.74  | 0.012 |
| 33.  | BD | ( 1) | C10-Ru52 | 819. | RY*( 5) Ru53     | 0.18         | 6.96  | 0.032 |
| 33.  | BD | ( 1) | C10-Ru52 | 820. | RY*( 6) Ru53     | 0.09         | 4.05  | 0.017 |
| 33.  | BD | ( 1) | C10-Ru52 | 821. | RY*( 7) Ru53     | 0.42         | 3.55  | 0.035 |
| 33.  | BD | ( 1) | C10-Ru52 | 822. | RY*( 8) Ru53     | 0.14         | 5.15  | 0.024 |
| 33.  | BD | ( 1) | C10-Ru52 | 823. | RY*( 9) Ru53     | 0.36         | 9.61  | 0.053 |
| 33.  | BD | ( 1) | C10-Ru52 | 824. | RY*(10) Ru53     | 0.28         | 7.57  | 0.042 |
| 33.  | BD | ( 1) | C10-Ru52 | 825. | RY*(11) Ru53     | 0.23         | 6.52  | 0.035 |
| 33.  | BD | ( 1) | C10-Ru52 | 827. | RY*(13) Ru53     | 0.13         | 14.28 | 0.040 |
| 33.  | BD | ( 1) | C10-Ru52 | 828. | RY*(14) Ru53     | 0.05         | 9.17  | 0.020 |
| 33.  | BD | ( 1) | C10-Ru52 | 831. | RY*(17) Ru53     | 0.16         | 12.95 | 0.041 |
| 33.  | BD | ( 1) | C10-Ru52 | 834. | RY*(20) Ru53     | 0.12         | 11.93 | 0.034 |
| 33.  | BD | ( 1) | C10-Ru52 | 836. | RY*(22) Ru53     | 0.24         | 11.10 | 0.047 |
| 33.  | BD | ( 1) | C10-Ru52 | 838. | RY*(24) Ru53     | 0.1335647.34 | 1.924 |       |
| 33.  | BD | ( 1) | C10-Ru52 | 839. | RY*(25) Ru53     | 0.15 5348.39 | 0.820 |       |
| 33.  | BD | ( 1) | C10-Ru52 | 840. | RY*(26) Ru53     | 0.25 5744.01 | 1.098 |       |
| 33.  | BD | ( 1) | C10-Ru52 | 843. | RY*(29) Ru53     | 0.11 10.66   | 0.031 |       |
| 33.  | BD | ( 1) | C10-Ru52 | 844. | RY*(30) Ru53     | 0.22 32.95   | 0.078 |       |
| 33.  | BD | ( 1) | C10-Ru52 | 847. | RY*(33) Ru53     | 0.26 278.04  | 0.243 |       |
| 33.  | BD | ( 1) | C10-Ru52 | 852. | RY*(38) Ru53     | 0.26 356.21  | 0.276 |       |
| 33.  | BD | ( 1) | C10-Ru52 | 855. | RY*(41) Ru53     | 0.09 141.16  | 0.105 |       |
| 33.  | BD | ( 1) | C10-Ru52 | 856. | RY*(42) Ru53     | 0.20 3162.97 | 0.727 |       |
| 33.  | BD | ( 1) | C10-Ru52 | 859. | RY*(45) Ru53     | 0.07 51.11   | 0.056 |       |
| 33.  | BD | ( 1) | C10-Ru52 | 906. | BD*( 1) C 6-Ru53 | 0.08         | 0.64  | 0.007 |
| 33.  | BD | ( 1) | C10-Ru52 | 907. | BD*( 1) C 8-Ru53 | 0.50         | 0.64  | 0.017 |
| 33.  | BD | ( 1) | C10-Ru52 | 926. | BD*( 1) C16-Ru53 | 0.07         | 0.53  | 0.006 |
| 34.  | BD | ( 1) | C11- C15 | 338. | RY*( 6) C12      | 0.06         | 3.48  | 0.013 |
| 34.  | BD | ( 1) | C11- C15 | 570. | RY*( 3) H29      | 0.17         | 1.76  | 0.015 |
| 34.  | BD | ( 1) | C11- C15 | 824. | RY*(10) Ru53     | 0.05         | 7.66  | 0.018 |
| 36.  | BD | ( 1) | C11-Ru52 | 393. | RY*( 1) C16      | 0.05         | 1.41  | 0.008 |
| 36.  | BD | ( 1) | C11-Ru52 | 815. | RY*( 1) Ru53     | 0.05         | 7.32  | 0.018 |
| 36.  | BD | ( 1) | C11-Ru52 | 817. | RY*( 3) Ru53     | 0.13         | 1.48  | 0.013 |
| 36.  | BD | ( 1) | C11-Ru52 | 818. | RY*( 4) Ru53     | 0.13         | 2.57  | 0.017 |
| 36.  | BD | ( 1) | C11-Ru52 | 820. | RY*( 6) Ru53     | 0.08         | 3.88  | 0.016 |
| 36.  | BD | ( 1) | C11-Ru52 | 822. | RY*( 8) Ru53     | 0.06         | 4.98  | 0.016 |
| 36.  | BD | ( 1) | C11-Ru52 | 825. | RY*(11) Ru53     | 0.07         | 6.35  | 0.019 |
| 36.  | BD | ( 1) | C11-Ru52 | 907. | BD*( 1) C 8-Ru53 | 0.37         | 0.47  | 0.012 |
| 36.  | BD | ( 1) | C11-Ru52 | 926. | BD*( 1) C16-Ru53 | 0.16         | 0.36  | 0.007 |
| 113. | CR | ( 3) | Ru52     | 906. | BD*( 1) C 6-Ru53 | 0.05         | 22.01 | 0.033 |
| 113. | CR | ( 3) | Ru52     | 907. | BD*( 1) C 8-Ru53 | 0.07         | 22.00 | 0.037 |
| 114. | CR | ( 4) | Ru52     | 906. | BD*( 1) C 6-Ru53 | 0.14         | 4.72  | 0.025 |
| 114. | CR | ( 4) | Ru52     | 907. | BD*( 1) C 8-Ru53 | 0.27         | 4.72  | 0.035 |
| 120. | CR | (10) | Ru52     | 907. | BD*( 1) C 8-Ru53 | 0.07         | 1.95  | 0.011 |
| 159. | LP | ( 1) | N50      | 906. | BD*( 1) C 6-Ru53 | 0.10         | 0.48  | 0.006 |
| 161. | LP | ( 1) | Ru52     | 816. | RY*( 2) Ru53     | 0.10         | 2.04  | 0.014 |
| 161. | LP | ( 1) | Ru52     | 817. | RY*( 3) Ru53     | 0.08         | 1.32  | 0.010 |
| 161. | LP | ( 1) | Ru52     | 821. | RY*( 7) Ru53     | 0.20         | 3.22  | 0.024 |
| 161. | LP | ( 1) | Ru52     | 822. | RY*( 8) Ru53     | 0.13         | 4.82  | 0.024 |
| 161. | LP | ( 1) | Ru52     | 823. | RY*( 9) Ru53     | 0.13         | 9.28  | 0.033 |
| 161. | LP | ( 1) | Ru52     | 824. | RY*(10) Ru53     | 0.15         | 7.25  | 0.031 |
| 161. | LP | ( 1) | Ru52     | 827. | RY*(13) Ru53     | 0.08         | 13.95 | 0.031 |
| 161. | LP | ( 1) | Ru52     | 834. | RY*(20) Ru53     | 0.17         | 11.60 | 0.042 |
| 161. | LP | ( 1) | Ru52     | 836. | RY*(22) Ru53     | 0.09         | 10.77 | 0.029 |
| 161. | LP | ( 1) | Ru52     | 838. | RY*(24) Ru53     | 0.0835647.02 | 1.608 |       |
| 161. | LP | ( 1) | Ru52     | 839. | RY*(25) Ru53     | 0.09 5348.06 | 0.654 |       |
| 161. | LP | ( 1) | Ru52     | 840. | RY*(26) Ru53     | 0.16 5743.68 | 0.901 |       |
| 161. | LP | ( 1) | Ru52     | 843. | RY*(29) Ru53     | 0.07 10.33   | 0.026 |       |
| 161. | LP | ( 1) | Ru52     | 844. | RY*(30) Ru53     | 0.12 32.62   | 0.060 |       |
| 161. | LP | ( 1) | Ru52     | 847. | RY*(33) Ru53     | 0.14 277.72  | 0.189 |       |
| 161. | LP | ( 1) | Ru52     | 852. | RY*(38) Ru53     | 0.15 355.88  | 0.221 |       |
| 161. | LP | ( 1) | Ru52     | 855. | RY*(41) Ru53     | 0.06 140.83  | 0.088 |       |
| 161. | LP | ( 1) | Ru52     | 856. | RY*(42) Ru53     | 0.13 3162.64 | 0.600 |       |
| 161. | LP | ( 1) | Ru52     | 859. | RY*(45) Ru53     | 0.13 50.78   | 0.078 |       |
| 161. | LP | ( 1) | Ru52     | 860. | RY*(46) Ru53     | 0.08 186.34  | 0.118 |       |
| 162. | LP | ( 2) | Ru52     | 245. | RY*( 3) C 6      | 0.11         | 2.81  | 0.017 |
| 162. | LP | ( 2) | Ru52     | 249. | RY*( 7) C 6      | 0.08         | 7.13  | 0.022 |
| 162. | LP | ( 2) | Ru52     | 815. | RY*( 1) Ru53     | 0.12         | 7.17  | 0.029 |
| 162. | LP | ( 2) | Ru52     | 816. | RY*( 2) Ru53     | 0.09         | 2.04  | 0.013 |
| 162. | LP | ( 2) | Ru52     | 817. | RY*( 3) Ru53     | 0.12         | 1.32  | 0.012 |
| 162. | LP | ( 2) | Ru52     | 818. | RY*( 4) Ru53     | 0.06         | 2.41  | 0.011 |
| 162. | LP | ( 2) | Ru52     | 820. | RY*( 6) Ru53     | 0.14         | 3.72  | 0.022 |
| 162. | LP | ( 2) | Ru52     | 821. | RY*( 7) Ru53     | 0.70         | 3.22  | 0.046 |
| 162. | LP | ( 2) | Ru52     | 822. | RY*( 8) Ru53     | 0.24         | 4.82  | 0.033 |
| 162. | LP | ( 2) | Ru52     | 823. | RY*( 9) Ru53     | 0.39         | 9.28  | 0.058 |
| 162. | LP | ( 2) | Ru52     | 824. | RY*(10) Ru53     | 0.43         | 7.25  | 0.054 |
| 162. | LP | ( 2) | Ru52     | 825. | RY*(11) Ru53     | 0.24         | 6.19  | 0.037 |
| 162. | LP | ( 2) | Ru52     | 826. | RY*(12) Ru53     | 0.06         | 3.10  | 0.013 |
| 162. | LP | ( 2) | Ru52     | 827. | RY*(13) Ru53     | 0.18         | 13.95 | 0.049 |
| 162. | LP | ( 2) | Ru52     | 830. | RY*(16) Ru53     | 0.06         | 6.83  | 0.020 |
| 162. | LP | ( 2) | Ru52     | 831. | RY*(17) Ru53     | 0.28         | 12.62 | 0.057 |
| 162. | LP | ( 2) | Ru52     | 834. | RY*(20) Ru53     | 0.72         | 11.60 | 0.088 |
| 162. | LP | ( 2) | Ru52     | 835. | RY*(21) Ru53     | 0.11         | 12.52 | 0.036 |
| 162. | LP | ( 2) | Ru52     | 836. | RY*(22) Ru53     | 0.34         | 10.77 | 0.058 |
| 162. | LP | ( 2) | Ru52     | 838. | RY*(24) Ru53     | 0.2735647.02 | 2.968 |       |
| 162. | LP | ( 2) | Ru52     | 839. | RY*(25) Ru53     | 0.29 5348.06 | 1.190 |       |
| 162. | LP | ( 2) | Ru52     | 840. | RY*(26) Ru53     | 0.52 5743.68 | 1.656 |       |
| 162. | LP | ( 2) | Ru52     | 843. | RY*(29) Ru53     | 0.21 10.33   | 0.045 |       |
| 162. | LP | ( 2) | Ru52     | 844. | RY*(30) Ru53     | 0.35 32.62   | 0.103 |       |
| 162. | LP | ( 2) | Ru52     | 847. | RY*(33) Ru53     | 0.46 277.72  | 0.344 |       |
| 162. | LP | ( 2) | Ru52     | 852. | RY*(38) Ru53     | 0.50 355.88  | 0.406 |       |
| 162. | LP | ( 2) | Ru52     | 855. | RY*(41) Ru53     | 0.20 140.83  | 0.163 |       |
| 162. | LP | ( 2) | Ru52     | 856. | RY*(42) Ru53     | 0.42 3162.64 | 1.103 |       |
| 162. | LP | ( 2) | Ru52     | 859. | RY*(45) Ru53     | 0.56 50.78   | 0.163 |       |
| 162. | LP | ( 2) | Ru52     | 860. | RY*(46) Ru53     | 0.35 186.34  | 0.245 |       |
| 162. | LP | ( 2) | Ru52     | 906. | BD*( 1) C 6-Ru53 | 0.24         | 0.32  | 0.008 |
| 162. | LP | ( 2) | Ru52     | 907. | BD*( 1) C 8-Ru53 | 0.07         | 0.31  | 0.004 |
| 163. | LP | ( 3) | Ru52     | 816. | RY*( 2) Ru53     | 0.06         | 2.04  | 0.011 |
| 163. | LP | ( 3) | Ru52     | 817. | RY*( 3) Ru53     | 0.09         | 1.33  | 0.011 |



|                       |                      |      |       |       |  |
|-----------------------|----------------------|------|-------|-------|--|
| from unit 1 to unit 3 |                      |      |       |       |  |
| 1. BD (1) C 1- C 2    | 638. RY*(1) H43      | 0.08 | 1.90  | 0.011 |  |
| 5. BD (1) C 2- H27    | 638. RY*(1) H43      | 0.09 | 1.73  | 0.011 |  |
| 5. BD (1) C 2- H27    | 688. RY*(1) O47      | 0.09 | 2.18  | 0.013 |  |
| 6. BD (1) C 2- N50    | 638. RY*(1) H43      | 0.16 | 2.02  | 0.016 |  |
| 6. BD (1) C 2- N50    | 639. RY*(2) H43      | 0.06 | 2.61  | 0.011 |  |
| 6. BD (1) C 2- N50    | 688. RY*(1) O47      | 0.23 | 2.47  | 0.021 |  |
| 6. BD (1) C 2- N50    | 693. RY*(6) O47      | 0.06 | 2.89  | 0.011 |  |
| 10. BD (1) C 4- O44   | 641. RY*(4) H43      | 0.05 | 2.52  | 0.010 |  |
| 12. BD (3) C 4- O44   | 638. RY*(1) H43      | 0.81 | 2.33  | 0.039 |  |
| 12. BD (3) C 4- O44   | 639. RY*(2) H43      | 0.14 | 2.92  | 0.018 |  |
| 12. BD (3) C 4- O44   | 640. RY*(3) H43      | 0.10 | 3.06  | 0.015 |  |
| 12. BD (3) C 4- O44   | 641. RY*(4) H43      | 0.32 | 3.22  | 0.029 |  |
| 12. BD (3) C 4- O44   | 688. RY*(1) O47      | 0.20 | 2.79  | 0.021 |  |
| 12. BD (3) C 4- O44   | 690. RY*(3) O47      | 0.07 | 3.64  | 0.015 |  |
| 12. BD (3) C 4- O44   | 692. RY*(5) O47      | 0.34 | 3.52  | 0.031 |  |
| 12. BD (3) C 4- O44   | 697. RY*(10) O47     | 0.10 | 5.90  | 0.022 |  |
| 12. BD (3) C 4- O44   | 698. RY*(11) O47     | 0.13 | 5.67  | 0.025 |  |
| 12. BD (3) C 4- O44   | 700. RY*(13) O47     | 0.05 | 5.25  | 0.015 |  |
| 12. BD (3) C 4- O44   | 702. RY*(15) O47     | 0.07 | 79.25 | 0.066 |  |
| 13. BD (1) C 4- Ru52  | 639. RY*(2) H43      | 0.22 | 2.36  | 0.021 |  |
| 13. BD (1) C 4- Ru52  | 641. RY*(4) H43      | 0.09 | 2.66  | 0.014 |  |
| 13. BD (1) C 4- Ru52  | 689. RY*(2) O47      | 0.50 | 2.88  | 0.035 |  |
| 13. BD (1) C 4- Ru52  | 690. RY*(3) O47      | 0.82 | 3.08  | 0.046 |  |
| 13. BD (1) C 4- Ru52  | 691. RY*(4) O47      | 0.68 | 4.25  | 0.049 |  |
| 13. BD (1) C 4- Ru52  | 693. RY*(6) O47      | 0.11 | 2.65  | 0.016 |  |
| 13. BD (1) C 4- Ru52  | 697. RY*(10) O47     | 0.05 | 5.34  | 0.015 |  |
| 13. BD (1) C 4- Ru52  | 701. RY*(14) O47     | 0.20 | 92.83 | 0.125 |  |
| 13. BD (1) C 4- Ru52  | 702. RY*(15) O47     | 0.29 | 78.69 | 0.138 |  |
| 20. BD (1) C 7- C 9   | 688. RY*(1) O47      | 0.09 | 2.30  | 0.013 |  |
| 20. BD (1) C 7- C 9   | 690. RY*(3) O47      | 0.08 | 3.15  | 0.014 |  |
| 22. BD (2) C 7- N50   | 691. RY*(4) O47      | 0.05 | 4.02  | 0.014 |  |
| 22. BD (2) C 7- N50   | 694. RY*(7) O47      | 0.06 | 2.84  | 0.013 |  |
| 27. BD (1) C 9- C11   | 638. RY*(1) H43      | 0.13 | 1.85  | 0.014 |  |
| 27. BD (1) C 9- C11   | 688. RY*(1) O47      | 0.22 | 2.31  | 0.020 |  |
| 27. BD (1) C 9- C11   | 693. RY*(6) O47      | 0.08 | 2.73  | 0.013 |  |
| 27. BD (1) C 9- C11   | 697. RY*(10) O47     | 0.05 | 5.42  | 0.015 |  |
| 27. BD (1) C 9- C11   | 934. BD*(1) H43- O47 | 0.08 | 1.06  | 0.008 |  |
| 30. BD (1) C10- O48   | 638. RY*(1) H43      | 0.06 | 1.66  | 0.009 |  |
| 30. BD (1) C10- O48   | 640. RY*(3) H43      | 0.06 | 2.39  | 0.011 |  |
| 30. BD (1) C10- O48   | 641. RY*(4) H43      | 0.10 | 2.56  | 0.014 |  |
| 31. BD (2) C10- O48   | 641. RY*(4) H43      | 0.07 | 2.53  | 0.012 |  |
| 32. BD (3) C10- O48   | 638. RY*(1) H43      | 1.14 | 2.29  | 0.046 |  |
| 32. BD (3) C10- O48   | 639. RY*(2) H43      | 0.32 | 2.88  | 0.027 |  |
| 32. BD (3) C10- O48   | 640. RY*(3) H43      | 0.23 | 3.02  | 0.024 |  |
| 32. BD (3) C10- O48   | 641. RY*(4) H43      | 1.03 | 3.18  | 0.051 |  |
| 32. BD (3) C10- O48   | 642. RY*(5) H43      | 0.09 | 3.92  | 0.016 |  |
| 32. BD (3) C10- O48   | 688. RY*(1) O47      | 0.11 | 2.74  | 0.015 |  |
| 32. BD (3) C10- O48   | 689. RY*(2) O47      | 0.21 | 3.40  | 0.024 |  |
| 32. BD (3) C10- O48   | 690. RY*(3) O47      | 0.21 | 3.60  | 0.025 |  |
| 32. BD (3) C10- O48   | 692. RY*(5) O47      | 0.38 | 3.47  | 0.033 |  |
| 32. BD (3) C10- O48   | 693. RY*(6) O47      | 0.20 | 3.17  | 0.022 |  |
| 32. BD (3) C10- O48   | 698. RY*(11) O47     | 0.33 | 5.63  | 0.039 |  |
| 32. BD (3) C10- O48   | 934. BD*(1) H43- O47 | 0.05 | 1.49  | 0.008 |  |
| 33. BD (1) C10- Ru52  | 638. RY*(1) H43      | 0.31 | 1.78  | 0.021 |  |
| 33. BD (1) C10- Ru52  | 640. RY*(3) H43      | 0.14 | 2.50  | 0.017 |  |
| 33. BD (1) C10- Ru52  | 689. RY*(2) O47      | 1.05 | 2.88  | 0.050 |  |
| 33. BD (1) C10- Ru52  | 690. RY*(3) O47      | 1.97 | 3.08  | 0.071 |  |
| 33. BD (1) C10- Ru52  | 691. RY*(4) O47      | 0.29 | 4.25  | 0.032 |  |
| 33. BD (1) C10- Ru52  | 692. RY*(5) O47      | 0.43 | 2.96  | 0.033 |  |
| 33. BD (1) C10- Ru52  | 693. RY*(6) O47      | 0.18 | 2.65  | 0.020 |  |
| 33. BD (1) C10- Ru52  | 695. RY*(8) O47      | 0.11 | 3.04  | 0.017 |  |
| 33. BD (1) C10- Ru52  | 696. RY*(9) O47      | 0.17 | 3.19  | 0.021 |  |
| 33. BD (1) C10- Ru52  | 697. RY*(10) O47     | 0.22 | 5.35  | 0.031 |  |
| 33. BD (1) C10- Ru52  | 700. RY*(13) O47     | 0.07 | 4.70  | 0.016 |  |
| 33. BD (1) C10- Ru52  | 702. RY*(15) O47     | 0.13 | 78.70 | 0.091 |  |
| 34. BD (1) C11- C15   | 638. RY*(1) H43      | 0.49 | 1.86  | 0.027 |  |
| 34. BD (1) C11- C15   | 639. RY*(2) H43      | 0.11 | 2.45  | 0.014 |  |
| 34. BD (1) C11- C15   | 640. RY*(3) H43      | 0.12 | 2.59  | 0.016 |  |
| 34. BD (1) C11- C15   | 641. RY*(4) H43      | 0.36 | 2.76  | 0.028 |  |
| 34. BD (1) C11- C15   | 642. RY*(5) H43      | 0.05 | 3.49  | 0.012 |  |
| 34. BD (1) C11- C15   | 689. RY*(2) O47      | 0.11 | 2.97  | 0.016 |  |
| 34. BD (1) C11- C15   | 692. RY*(5) O47      | 0.09 | 3.05  | 0.015 |  |
| 34. BD (1) C11- C15   | 698. RY*(11) O47     | 0.13 | 5.20  | 0.023 |  |
| 34. BD (1) C11- C15   | 934. BD*(1) H43- O47 | 0.09 | 1.07  | 0.009 |  |
| 36. BD (1) C11- Ru52  | 640. RY*(3) H43      | 0.12 | 2.33  | 0.016 |  |
| 36. BD (1) C11- Ru52  | 641. RY*(4) H43      | 0.12 | 2.50  | 0.016 |  |
| 36. BD (1) C11- Ru52  | 642. RY*(5) H43      | 0.05 | 3.23  | 0.012 |  |
| 36. BD (1) C11- Ru52  | 689. RY*(2) O47      | 0.65 | 2.71  | 0.039 |  |
| 36. BD (1) C11- Ru52  | 690. RY*(3) O47      | 1.45 | 2.91  | 0.060 |  |
| 36. BD (1) C11- Ru52  | 691. RY*(4) O47      | 0.29 | 4.08  | 0.032 |  |
| 36. BD (1) C11- Ru52  | 693. RY*(6) O47      | 0.21 | 2.48  | 0.021 |  |
| 36. BD (1) C11- Ru52  | 695. RY*(8) O47      | 0.16 | 2.87  | 0.020 |  |
| 36. BD (1) C11- Ru52  | 696. RY*(9) O47      | 0.11 | 3.02  | 0.017 |  |
| 36. BD (1) C11- Ru52  | 697. RY*(10) O47     | 0.07 | 5.18  | 0.018 |  |
| 36. BD (1) C11- Ru52  | 698. RY*(11) O47     | 0.14 | 4.95  | 0.024 |  |
| 36. BD (1) C11- Ru52  | 700. RY*(13) O47     | 0.18 | 4.53  | 0.026 |  |
| 36. BD (1) C11- Ru52  | 702. RY*(15) O47     | 0.11 | 78.53 | 0.084 |  |
| 114. CR (4) Ru52      | 638. RY*(1) H43      | 0.10 | 5.85  | 0.021 |  |
| 120. CR (10) Ru52     | 934. BD*(1) H43- O47 | 0.19 | 2.29  | 0.018 |  |
| 159. LP (1) N50       | 693. RY*(6) O47      | 0.07 | 2.49  | 0.013 |  |
| 161. LP (1) Ru52      | 689. RY*(2) O47      | 0.11 | 2.56  | 0.016 |  |
| 162. LP (2) Ru52      | 639. RY*(2) H43      | 0.07 | 2.04  | 0.011 |  |
| 162. LP (2) Ru52      | 641. RY*(4) H43      | 0.07 | 2.34  | 0.012 |  |
| 162. LP (2) Ru52      | 689. RY*(2) O47      | 0.56 | 2.56  | 0.036 |  |
| 162. LP (2) Ru52      | 690. RY*(3) O47      | 0.09 | 2.76  | 0.015 |  |
| 162. LP (2) Ru52      | 691. RY*(4) O47      | 0.06 | 3.93  | 0.013 |  |
| 162. LP (2) Ru52      | 694. RY*(7) O47      | 0.06 | 2.75  | 0.013 |  |
| 162. LP (2) Ru52      | 696. RY*(9) O47      | 0.07 | 2.86  | 0.014 |  |
| 162. LP (2) Ru52      | 934. BD*(1) H43- O47 | 0.32 | 0.65  | 0.014 |  |
| 163. LP (3) Ru52      | 638. RY*(1) H43      | 0.17 | 1.45  | 0.015 |  |
| 163. LP (3) Ru52      | 688. RY*(1) O47      | 1.88 | 1.91  | 0.059 |  |
| 163. LP (3) Ru52      | 689. RY*(2) O47      | 0.12 | 2.56  | 0.018 |  |
| 163. LP (3) Ru52      | 690. RY*(3) O47      | 0.09 | 2.76  | 0.016 |  |
| 163. LP (3) Ru52      | 696. RY*(9) O47      | 0.13 | 2.87  | 0.019 |  |
| 163. LP (3) Ru52      | 698. RY*(11) O47     | 0.12 | 4.80  | 0.023 |  |
| 163. LP (3) Ru52      | 699. RY*(12) O47     | 0.12 | 4.74  | 0.023 |  |
| 163. LP (3) Ru52      | 934. BD*(1) H43- O47 | 0.23 | 0.66  | 0.012 |  |
| from unit 1 to unit 4 |                      |      |       |       |  |
| 1. BD (1) C 1- C 2    | 719. RY*(2) C149     | 0.09 | 2.44  | 0.014 |  |
| 1. BD (1) C 1- C 2    | 720. RY*(3) C149     | 0.15 | 2.54  | 0.018 |  |
| 1. BD (1) C 1- C 2    | 721. RY*(4) C149     | 0.14 | 3.25  | 0.019 |  |
| 1. BD (1) C 1- C 2    | 722. RY*(5) C149     | 0.24 | 2.96  | 0.024 |  |
| 1. BD (1) C 1- C 2    | 723. RY*(6) C149     | 0.06 | 3.69  | 0.014 |  |
| 5. BD (1) C 2- H27    | 719. RY*(2) C149     | 0.05 | 2.26  | 0.010 |  |

|                       |    |     |      |      |      |         |      |      |       |       |
|-----------------------|----|-----|------|------|------|---------|------|------|-------|-------|
| 5.                    | BD | (1) | C 2- | H27  | 720. | RY*(3)  | C149 | 0.13 | 2.36  | 0.015 |
| 5.                    | BD | (1) | C 2- | H27  | 721. | RY*(4)  | C149 | 0.10 | 3.07  | 0.016 |
| 5.                    | BD | (1) | C 2- | H27  | 722. | RY*(5)  | C149 | 0.39 | 2.78  | 0.029 |
| 5.                    | BD | (1) | C 2- | H27  | 727. | RY*(10) | C149 | 0.07 | 3.99  | 0.015 |
| 6.                    | BD | (1) | C 2- | N50  | 719. | RY*(2)  | C149 | 0.16 | 2.55  | 0.018 |
| 6.                    | BD | (1) | C 2- | N50  | 720. | RY*(3)  | C149 | 0.41 | 2.65  | 0.029 |
| 6.                    | BD | (1) | C 2- | N50  | 721. | RY*(4)  | C149 | 0.22 | 3.36  | 0.024 |
| 6.                    | BD | (1) | C 2- | N50  | 722. | RY*(5)  | C149 | 0.86 | 3.07  | 0.046 |
| 6.                    | BD | (1) | C 2- | N50  | 723. | RY*(6)  | C149 | 0.09 | 3.81  | 0.016 |
| 6.                    | BD | (1) | C 2- | N50  | 724. | RY*(7)  | C149 | 0.08 | 2.53  | 0.013 |
| 6.                    | BD | (1) | C 2- | N50  | 726. | RY*(9)  | C149 | 0.06 | 2.21  | 0.010 |
| 6.                    | BD | (1) | C 2- | N50  | 727. | RY*(10) | C149 | 0.14 | 4.28  | 0.022 |
| 6.                    | BD | (1) | C 2- | N50  | 733. | RY*(16) | C149 | 0.07 | 5.30  | 0.017 |
| 12.                   | BD | (3) | C 4- | O44  | 719. | RY*(2)  | C149 | 0.74 | 2.87  | 0.041 |
| 12.                   | BD | (3) | C 4- | O44  | 720. | RY*(3)  | C149 | 3.44 | 2.97  | 0.090 |
| 12.                   | BD | (3) | C 4- | O44  | 721. | RY*(4)  | C149 | 1.27 | 3.67  | 0.061 |
| 12.                   | BD | (3) | C 4- | O44  | 722. | RY*(5)  | C149 | 1.91 | 3.38  | 0.072 |
| 12.                   | BD | (3) | C 4- | O44  | 723. | RY*(6)  | C149 | 0.37 | 4.12  | 0.035 |
| 12.                   | BD | (3) | C 4- | O44  | 724. | RY*(7)  | C149 | 0.53 | 2.85  | 0.035 |
| 12.                   | BD | (3) | C 4- | O44  | 725. | RY*(8)  | C149 | 0.41 | 6.33  | 0.046 |
| 12.                   | BD | (3) | C 4- | O44  | 727. | RY*(10) | C149 | 0.27 | 4.60  | 0.031 |
| 12.                   | BD | (3) | C 4- | O44  | 730. | RY*(13) | C149 | 0.09 | 5.64  | 0.021 |
| 12.                   | BD | (3) | C 4- | O44  | 733. | RY*(16) | C149 | 0.17 | 5.62  | 0.027 |
| 13.                   | BD | (1) | C 4- | Ru52 | 719. | RY*(2)  | C149 | 0.50 | 2.30  | 0.031 |
| 13.                   | BD | (1) | C 4- | Ru52 | 721. | RY*(4)  | C149 | 0.44 | 3.11  | 0.034 |
| 13.                   | BD | (1) | C 4- | Ru52 | 722. | RY*(5)  | C149 | 0.29 | 2.82  | 0.026 |
| 13.                   | BD | (1) | C 4- | Ru52 | 723. | RY*(6)  | C149 | 0.27 | 3.56  | 0.028 |
| 13.                   | BD | (1) | C 4- | Ru52 | 724. | RY*(7)  | C149 | 0.23 | 2.29  | 0.021 |
| 13.                   | BD | (1) | C 4- | Ru52 | 725. | RY*(8)  | C149 | 0.29 | 5.77  | 0.037 |
| 13.                   | BD | (1) | C 4- | Ru52 | 726. | RY*(9)  | C149 | 0.06 | 1.96  | 0.010 |
| 13.                   | BD | (1) | C 4- | Ru52 | 732. | RY*(15) | C149 | 0.06 | 26.54 | 0.036 |
| 13.                   | BD | (1) | C 4- | Ru52 | 735. | RY*(18) | C149 | 0.05 | 41.12 | 0.043 |
| 14.                   | BD | (1) | C 5- | C 7  | 722. | RY*(5)  | C149 | 0.05 | 2.95  | 0.011 |
| 21.                   | BD | (1) | C 7- | N50  | 719. | RY*(2)  | C149 | 0.18 | 2.53  | 0.019 |
| 21.                   | BD | (1) | C 7- | N50  | 720. | RY*(3)  | C149 | 0.12 | 2.64  | 0.016 |
| 21.                   | BD | (1) | C 7- | N50  | 721. | RY*(4)  | C149 | 0.17 | 3.34  | 0.021 |
| 21.                   | BD | (1) | C 7- | N50  | 722. | RY*(5)  | C149 | 0.16 | 3.05  | 0.020 |
| 21.                   | BD | (1) | C 7- | N50  | 723. | RY*(6)  | C149 | 0.08 | 3.79  | 0.015 |
| 21.                   | BD | (1) | C 7- | N50  | 725. | RY*(8)  | C149 | 0.06 | 6.00  | 0.017 |
| 22.                   | BD | (2) | C 7- | N50  | 722. | RY*(5)  | C149 | 0.09 | 2.59  | 0.015 |
| 27.                   | BD | (1) | C 9- | C11  | 720. | RY*(3)  | C149 | 0.30 | 2.49  | 0.025 |
| 27.                   | BD | (1) | C 9- | C11  | 721. | RY*(4)  | C149 | 0.12 | 3.19  | 0.018 |
| 27.                   | BD | (1) | C 9- | C11  | 722. | RY*(5)  | C149 | 0.24 | 2.91  | 0.024 |
| 30.                   | BD | (1) | C10- | O48  | 720. | RY*(3)  | C149 | 0.06 | 2.30  | 0.010 |
| 30.                   | BD | (1) | C10- | O48  | 721. | RY*(4)  | C149 | 0.07 | 3.00  | 0.013 |
| 30.                   | BD | (1) | C10- | O48  | 722. | RY*(5)  | C149 | 0.10 | 2.72  | 0.015 |
| 31.                   | BD | (2) | C10- | O48  | 721. | RY*(4)  | C149 | 0.12 | 2.98  | 0.017 |
| 31.                   | BD | (2) | C10- | O48  | 722. | RY*(5)  | C149 | 0.08 | 2.69  | 0.013 |
| 32.                   | BD | (3) | C10- | O48  | 718. | RY*(1)  | C149 | 0.07 | 1.67  | 0.010 |
| 32.                   | BD | (3) | C10- | O48  | 719. | RY*(2)  | C149 | 0.87 | 2.83  | 0.044 |
| 32.                   | BD | (3) | C10- | O48  | 720. | RY*(3)  | C149 | 2.78 | 2.93  | 0.081 |
| 32.                   | BD | (3) | C10- | O48  | 721. | RY*(4)  | C149 | 2.12 | 3.63  | 0.078 |
| 32.                   | BD | (3) | C10- | O48  | 722. | RY*(5)  | C149 | 2.34 | 3.34  | 0.079 |
| 32.                   | BD | (3) | C10- | O48  | 723. | RY*(6)  | C149 | 0.35 | 4.08  | 0.034 |
| 32.                   | BD | (3) | C10- | O48  | 724. | RY*(7)  | C149 | 0.37 | 2.81  | 0.029 |
| 32.                   | BD | (3) | C10- | O48  | 725. | RY*(8)  | C149 | 0.51 | 6.29  | 0.051 |
| 32.                   | BD | (3) | C10- | O48  | 727. | RY*(10) | C149 | 0.15 | 4.55  | 0.023 |
| 32.                   | BD | (3) | C10- | O48  | 730. | RY*(13) | C149 | 0.08 | 5.60  | 0.019 |
| 32.                   | BD | (3) | C10- | O48  | 733. | RY*(16) | C149 | 0.17 | 5.58  | 0.027 |
| 32.                   | BD | (3) | C10- | O48  | 736. | RY*(19) | C149 | 0.08 | 5.81  | 0.019 |
| 33.                   | BD | (1) | C10- | Ru52 | 719. | RY*(2)  | C149 | 0.15 | 2.31  | 0.017 |
| 33.                   | BD | (1) | C10- | Ru52 | 720. | RY*(3)  | C149 | 0.33 | 2.41  | 0.026 |
| 33.                   | BD | (1) | C10- | Ru52 | 721. | RY*(4)  | C149 | 0.09 | 3.12  | 0.015 |
| 33.                   | BD | (1) | C10- | Ru52 | 723. | RY*(6)  | C149 | 0.43 | 3.57  | 0.035 |
| 33.                   | BD | (1) | C10- | Ru52 | 724. | RY*(7)  | C149 | 0.84 | 2.29  | 0.040 |
| 33.                   | BD | (1) | C10- | Ru52 | 725. | RY*(8)  | C149 | 0.08 | 5.77  | 0.020 |
| 34.                   | BD | (1) | C11- | C15  | 719. | RY*(2)  | C149 | 0.25 | 2.40  | 0.022 |
| 34.                   | BD | (1) | C11- | C15  | 720. | RY*(3)  | C149 | 0.68 | 2.50  | 0.037 |
| 34.                   | BD | (1) | C11- | C15  | 721. | RY*(4)  | C149 | 0.51 | 3.20  | 0.036 |
| 34.                   | BD | (1) | C11- | C15  | 722. | RY*(5)  | C149 | 0.74 | 2.92  | 0.042 |
| 34.                   | BD | (1) | C11- | C15  | 723. | RY*(6)  | C149 | 0.09 | 3.65  | 0.016 |
| 34.                   | BD | (1) | C11- | C15  | 725. | RY*(8)  | C149 | 0.15 | 5.86  | 0.027 |
| 36.                   | BD | (1) | C11- | Ru52 | 719. | RY*(2)  | C149 | 0.07 | 2.14  | 0.012 |
| 36.                   | BD | (1) | C11- | Ru52 | 720. | RY*(3)  | C149 | 0.50 | 2.25  | 0.031 |
| 36.                   | BD | (1) | C11- | Ru52 | 721. | RY*(4)  | C149 | 0.13 | 2.95  | 0.018 |
| 36.                   | BD | (1) | C11- | Ru52 | 722. | RY*(5)  | C149 | 0.30 | 2.66  | 0.026 |
| 45.                   | BD | (1) | C15- | C19  | 720. | RY*(3)  | C149 | 0.08 | 2.51  | 0.012 |
| 45.                   | BD | (1) | C15- | C19  | 722. | RY*(5)  | C149 | 0.07 | 2.92  | 0.013 |
| 46.                   | BD | (1) | C15- | H33  | 722. | RY*(5)  | C149 | 0.05 | 2.75  | 0.011 |
| 113.                  | CR | (3) | Ru52 |      | 719. | RY*(2)  | C149 | 0.05 | 23.67 | 0.032 |
| 113.                  | CR | (3) | Ru52 |      | 720. | RY*(3)  | C149 | 0.16 | 23.78 | 0.055 |
| 113.                  | CR | (3) | Ru52 |      | 721. | RY*(4)  | C149 | 0.11 | 24.48 | 0.045 |
| 113.                  | CR | (3) | Ru52 |      | 722. | RY*(5)  | C149 | 0.14 | 24.19 | 0.053 |
| 114.                  | CR | (4) | Ru52 |      | 720. | RY*(3)  | C149 | 0.13 | 6.49  | 0.026 |
| 114.                  | CR | (4) | Ru52 |      | 721. | RY*(4)  | C149 | 0.16 | 7.20  | 0.030 |
| 114.                  | CR | (4) | Ru52 |      | 722. | RY*(5)  | C149 | 0.19 | 6.91  | 0.033 |
| 114.                  | CR | (4) | Ru52 |      | 723. | RY*(6)  | C149 | 0.07 | 7.64  | 0.020 |
| 114.                  | CR | (4) | Ru52 |      | 725. | RY*(8)  | C149 | 0.07 | 9.85  | 0.024 |
| 148.                  | LP | (1) | O44  |      | 721. | RY*(4)  | C149 | 0.07 | 3.27  | 0.014 |
| 148.                  | LP | (1) | O48  |      | 722. | RY*(5)  | C149 | 0.09 | 2.98  | 0.015 |
| 154.                  | LP | (1) | O48  |      | 720. | RY*(3)  | C149 | 0.06 | 2.56  | 0.011 |
| 159.                  | LP | (1) | N50  |      | 720. | RY*(3)  | C149 | 0.11 | 2.25  | 0.015 |
| 159.                  | LP | (1) | N50  |      | 722. | RY*(5)  | C149 | 0.12 | 2.67  | 0.018 |
| 161.                  | LP | (1) | Ru52 |      | 718. | RY*(1)  | C149 | 0.48 | 0.83  | 0.019 |
| 162.                  | LP | (2) | Ru52 |      | 721. | RY*(4)  | C149 | 0.07 | 2.79  | 0.014 |
| 162.                  | LP | (2) | Ru52 |      | 722. | RY*(5)  | C149 | 0.15 | 2.50  | 0.018 |
| 162.                  | LP | (2) | Ru52 |      | 727. | RY*(10) | C149 | 0.11 | 3.71  | 0.019 |
| 162.                  | LP | (2) | Ru52 |      | 735. | RY*(18) | C149 | 0.05 | 40.80 | 0.047 |
| 162.                  | LP | (2) | Ru52 |      | 736. | RY*(19) | C149 | 0.05 | 4.97  | 0.015 |
| 163.                  | LP | (3) | Ru52 |      | 719. | RY*(2)  | C149 | 0.07 | 1.99  | 0.011 |
| 163.                  | LP | (3) | Ru52 |      | 720. | RY*(3)  | C149 | 0.06 | 2.09  | 0.011 |
| 163.                  | LP | (3) | Ru52 |      | 721. | RY*(4)  | C149 | 0.09 | 2.80  | 0.015 |
| 163.                  | LP | (3) | Ru52 |      | 722. | RY*(5)  | C149 | 0.21 | 2.51  | 0.023 |
| 163.                  | LP | (3) | Ru52 |      | 723. | RY*(6)  | C149 | 0.09 | 3.24  | 0.017 |
| 163.                  | LP | (3) | Ru52 |      | 725. | RY*(8)  | C149 | 0.06 | 5.45  | 0.017 |
| from unit 2 to unit 1 |    |     |      |      |      |         |      |      |       |       |
| 17.                   | BD | (2) | C 6- | O45  | 169. | RY*(2)  | C 1  | 0.05 | 0.96  | 0.006 |
| 17.                   | BD | (2) | C 6- | O45  | 184. | RY*(2)  | C 2  | 0.09 | 1.03  | 0.008 |
| 18.                   | BD | (3) | C 6- | O45  | 265. | RY*(8)  | C 7  | 0.06 | 5.33  | 0.016 |
| 18.                   | BD | (3) | C 6- | O45  | 560. | RY*(3)  | H27  | 0.21 | 2.17  | 0.019 |
| 18.                   | BD | (3) | C 6- | O45  | 771. | RY*(5)  | Ru52 | 0.06 | 7.94  | 0.019 |
| 18.                   | BD | (3) | C 6- | O45  | 776. | RY*(10) | Ru52 | 0.14 | 9.41  | 0.033 |
| 19.                   | BD | (1) | C 6- | Ru53 | 184. | RY*(2)  | C 2  | 0.21 | 1.16  | 0.014 |
| 19.                   | BD | (1) | C 6- | Ru53 | 186. | RY*(4)  | C 2  | 0.06 | 1.77  | 0.009 |
| 19.                   | BD | (1) | C 6- | Ru53 | 213. | RY*(1)  | C 4  | 0.07 | 2.34  | 0.012 |

|      |    |      |          |        |      |      |          |          |           |           |         |       |
|------|----|------|----------|--------|------|------|----------|----------|-----------|-----------|---------|-------|
| 19.  | BD | (1)  | C        | 6-Ru53 | 216. | RY*  | (4)      | C        | 4         | 0.14      | 2.71    | 0.018 |
| 19.  | BD | (1)  | C        | 6-Ru53 | 219. | RY*  | (7)      | C        | 4         | 0.12      | 7.19    | 0.027 |
| 19.  | BD | (1)  | C        | 6-Ru53 | 258. | RY*  | (1)      | C        | 7         | 0.06      | 2.06    | 0.010 |
| 19.  | BD | (1)  | C        | 6-Ru53 | 319. | RY*  | (2)      | C11      |           | 0.05      | 1.18    | 0.007 |
| 19.  | BD | (1)  | C        | 6-Ru53 | 320. | RY*  | (3)      | C11      |           | 0.08      | 1.57    | 0.010 |
| 19.  | BD | (1)  | C        | 6-Ru53 | 383. | RY*  | (6)      | C15      |           | 0.07      | 3.78    | 0.015 |
| 19.  | BD | (1)  | C        | 6-Ru53 | 706. | RY*  | (4)      | O48      |           | 0.06      | 1.18    | 0.008 |
| 19.  | BD | (1)  | C        | 6-Ru53 | 767. | RY*  | (1)      | Ru52     |           | 0.13      | 7.33    | 0.028 |
| 19.  | BD | (1)  | C        | 6-Ru53 | 768. | RY*  | (2)      | Ru52     |           | 0.06      | 4.06    | 0.014 |
| 19.  | BD | (1)  | C        | 6-Ru53 | 770. | RY*  | (4)      | Ru52     |           | 0.31      | 2.83    | 0.027 |
| 19.  | BD | (1)  | C        | 6-Ru53 | 773. | RY*  | (7)      | Ru52     |           | 0.30      | 8.76    | 0.046 |
| 19.  | BD | (1)  | C        | 6-Ru53 | 774. | RY*  | (8)      | Ru52     |           | 0.33      | 4.16    | 0.033 |
| 19.  | BD | (1)  | C        | 6-Ru53 | 775. | RY*  | (9)      | Ru52     |           | 0.16      | 10.54   | 0.038 |
| 19.  | BD | (1)  | C        | 6-Ru53 | 776. | RY*  | (10)     | Ru52     |           | 0.27      | 8.88    | 0.045 |
| 19.  | BD | (1)  | C        | 6-Ru53 | 778. | RY*  | (12)     | Ru52     |           | 0.07      | 6.43    | 0.020 |
| 19.  | BD | (1)  | C        | 6-Ru53 | 779. | RY*  | (13)     | Ru52     |           | 0.25      | 15.26   | 0.056 |
| 19.  | BD | (1)  | C        | 6-Ru53 | 783. | RY*  | (17)     | Ru52     |           | 0.14      | 13.00   | 0.039 |
| 19.  | BD | (1)  | C        | 6-Ru53 | 786. | RY*  | (20)     | Ru52     |           | 0.09      | 10.78   | 0.028 |
| 19.  | BD | (1)  | C        | 6-Ru53 | 789. | RY*  | (23)     | Ru52     |           | 0.14      | 10.97   | 0.036 |
| 19.  | BD | (1)  | C        | 6-Ru53 | 790. | RY*  | (24)     | Ru52     |           | 0.1113605 | 4.6     | 1.120 |
| 19.  | BD | (1)  | C        | 6-Ru53 | 791. | RY*  | (25)     | Ru52     |           | 0.0633394 | 9.0     | 1.244 |
| 19.  | BD | (1)  | C        | 6-Ru53 | 792. | RY*  | (26)     | Ru52     |           | 0.13      | 1159.92 | 0.359 |
| 19.  | BD | (1)  | C        | 6-Ru53 | 795. | RY*  | (29)     | Ru52     |           | 0.13      | 53.46   | 0.076 |
| 19.  | BD | (1)  | C        | 6-Ru53 | 796. | RY*  | (30)     | Ru52     |           | 0.10      | 19.12   | 0.040 |
| 19.  | BD | (1)  | C        | 6-Ru53 | 804. | RY*  | (38)     | Ru52     |           | 0.14      | 258.83  | 0.175 |
| 19.  | BD | (1)  | C        | 6-Ru53 | 811. | RY*  | (45)     | Ru52     |           | 0.08      | 51.22   | 0.057 |
| 19.  | BD | (1)  | C        | 6-Ru53 | 875. | BD*  | (1)      | C        | 4-Ru52    | 0.46      | 0.63    | 0.016 |
| 19.  | BD | (1)  | C        | 6-Ru53 | 876. | BD*  | (1)      | C10-Ru52 |           | 0.05      | 0.64    | 0.005 |
| 19.  | BD | (1)  | C        | 6-Ru53 | 894. | BD*  | (1)      | C11-Ru52 |           | 0.06      | 0.54    | 0.005 |
| 23.  | BD | (1)  | C        | 8- O46 | 773. | RY*  | (7)      | Ru52     |           | 0.06      | 8.61    | 0.021 |
| 23.  | BD | (1)  | C        | 8- O46 | 774. | RY*  | (8)      | Ru52     |           | 0.05      | 4.01    | 0.013 |
| 23.  | BD | (1)  | C        | 8- O46 | 776. | RY*  | (10)     | Ru52     |           | 0.07      | 8.73    | 0.022 |
| 23.  | BD | (1)  | C        | 8- O46 | 786. | RY*  | (20)     | Ru52     |           | 0.05      | 10.63   | 0.021 |
| 25.  | BD | (3)  | C        | 8- O46 | 560. | RY*  | (3)      | H27      |           | 0.07      | 2.20    | 0.011 |
| 25.  | BD | (3)  | C        | 8- O46 | 776. | RY*  | (10)     | Ru52     |           | 0.08      | 9.44    | 0.025 |
| 26.  | BD | (1)  | C        | 8-Ru53 | 184. | RY*  | (2)      | C        | 2         | 0.05      | 1.15    | 0.007 |
| 26.  | BD | (1)  | C        | 8-Ru53 | 770. | RY*  | (4)      | Ru52     |           | 0.05      | 2.83    | 0.011 |
| 26.  | BD | (1)  | C        | 8-Ru53 | 772. | RY*  | (6)      | Ru52     |           | 0.09      | 4.92    | 0.019 |
| 39.  | BD | (1)  | C12- H29 | 878.   | BD*  | (2)  | C10- O48 |          | 0.08      | 0.48      | 0.006   |       |
| 40.  | BD | (1)  | C12- N51 | 785.   | RY*  | (19) | Ru52     |          | 0.05      | 7.89      | 0.018   |       |
| 47.  | BD | (1)  | C16- C18 | 773.   | RY*  | (7)  | Ru52     |          | 0.05      | 8.85      | 0.019   |       |
| 47.  | BD | (1)  | C16- C18 | 775.   | RY*  | (9)  | Ru52     |          | 0.05      | 10.64     | 0.021   |       |
| 49.  | BD | (1)  | C16-Ru53 | 770.   | RY*  | (4)  | Ru52     |          | 0.09      | 2.67      | 0.014   |       |
| 49.  | BD | (1)  | C16-Ru53 | 875.   | BD*  | (1)  | C        | 4-Ru52   | 0.33      | 0.47      | 0.012   |       |
| 49.  | BD | (1)  | C16-Ru53 | 894.   | BD*  | (1)  | C11-Ru52 |          | 0.14      | 0.37      | 0.007   |       |
| 60.  | BD | (2)  | C20- N51 | 304.   | RY*  | (2)  | C10      |          | 0.06      | 1.27      | 0.008   |       |
| 60.  | BD | (2)  | C20- N51 | 767.   | RY*  | (1)  | Ru52     |          | 0.15      | 7.10      | 0.031   |       |
| 60.  | BD | (2)  | C20- N51 | 768.   | RY*  | (2)  | Ru52     |          | 0.07      | 3.84      | 0.016   |       |
| 60.  | BD | (2)  | C20- N51 | 771.   | RY*  | (5)  | Ru52     |          | 0.06      | 7.18      | 0.019   |       |
| 60.  | BD | (2)  | C20- N51 | 773.   | RY*  | (7)  | Ru52     |          | 0.09      | 8.54      | 0.026   |       |
| 60.  | BD | (2)  | C20- N51 | 774.   | RY*  | (8)  | Ru52     |          | 0.06      | 3.93      | 0.014   |       |
| 60.  | BD | (2)  | C20- N51 | 775.   | RY*  | (9)  | Ru52     |          | 0.07      | 10.32     | 0.027   |       |
| 60.  | BD | (2)  | C20- N51 | 778.   | RY*  | (12) | Ru52     |          | 0.07      | 6.20      | 0.019   |       |
| 60.  | BD | (2)  | C20- N51 | 779.   | RY*  | (13) | Ru52     |          | 0.06      | 15.04     | 0.029   |       |
| 60.  | BD | (2)  | C20- N51 | 780.   | RY*  | (14) | Ru52     |          | 0.05      | 9.09      | 0.021   |       |
| 60.  | BD | (2)  | C20- N51 | 783.   | RY*  | (17) | Ru52     |          | 0.07      | 12.77     | 0.030   |       |
| 60.  | BD | (2)  | C20- N51 | 785.   | RY*  | (19) | Ru52     |          | 0.05      | 7.42      | 0.019   |       |
| 60.  | BD | (2)  | C20- N51 | 789.   | RY*  | (23) | Ru52     |          | 0.10      | 10.74     | 0.031   |       |
| 60.  | BD | (2)  | C20- N51 | 790.   | RY*  | (24) | Ru52     |          | 0.0713605 | 2.4       | 0.970   |       |
| 60.  | BD | (2)  | C20- N51 | 792.   | RY*  | (26) | Ru52     |          | 0.09      | 1159.69   | 0.311   |       |
| 60.  | BD | (2)  | C20- N51 | 795.   | RY*  | (29) | Ru52     |          | 0.09      | 53.23     | 0.065   |       |
| 60.  | BD | (2)  | C20- N51 | 796.   | RY*  | (30) | Ru52     |          | 0.07      | 18.90     | 0.035   |       |
| 60.  | BD | (2)  | C20- N51 | 804.   | RY*  | (38) | Ru52     |          | 0.10      | 258.60    | 0.155   |       |
| 131. | CR | (3)  | Ru53     | 776.   | RY*  | (10) | Ru52     |          | 0.05      | 30.22     | 0.035   |       |
| 131. | CR | (3)  | Ru53     | 875.   | BD*  | (1)  | C        | 4-Ru52   | 0.07      | 21.97     | 0.037   |       |
| 131. | CR | (3)  | Ru53     | 876.   | BD*  | (1)  | C10-Ru52 |          | 0.05      | 21.98     | 0.033   |       |
| 132. | CR | (4)  | Ru53     | 875.   | BD*  | (1)  | C        | 4-Ru52   | 0.27      | 4.72      | 0.034   |       |
| 132. | CR | (4)  | Ru53     | 876.   | BD*  | (1)  | C10-Ru52 |          | 0.14      | 4.72      | 0.025   |       |
| 138. | CR | (10) | Ru53     | 875.   | BD*  | (1)  | C        | 4-Ru52   | 0.07      | 1.95      | 0.011   |       |
| 160. | LP | (1)  | N51      | 876.   | BD*  | (1)  | C10-Ru52 |          | 0.08      | 0.49      | 0.005   |       |
| 164. | LP | (1)  | Ru53     | 188.   | RY*  | (6)  | C        | 2        | 0.06      | 3.25      | 0.013   |       |
| 164. | LP | (1)  | Ru53     | 767.   | RY*  | (1)  | Ru52     |          | 0.12      | 7.00      | 0.027   |       |
| 164. | LP | (1)  | Ru53     | 768.   | RY*  | (2)  | Ru52     |          | 0.20      | 3.74      | 0.026   |       |
| 164. | LP | (1)  | Ru53     | 773.   | RY*  | (7)  | Ru52     |          | 0.31      | 8.44      | 0.048   |       |
| 164. | LP | (1)  | Ru53     | 775.   | RY*  | (9)  | Ru52     |          | 0.19      | 10.22     | 0.041   |       |
| 164. | LP | (1)  | Ru53     | 776.   | RY*  | (10) | Ru52     |          | 0.17      | 8.56      | 0.036   |       |
| 164. | LP | (1)  | Ru53     | 778.   | RY*  | (12) | Ru52     |          | 0.11      | 6.10      | 0.024   |       |
| 164. | LP | (1)  | Ru53     | 779.   | RY*  | (13) | Ru52     |          | 0.16      | 14.94     | 0.046   |       |
| 164. | LP | (1)  | Ru53     | 780.   | RY*  | (14) | Ru52     |          | 0.05      | 8.99      | 0.020   |       |
| 164. | LP | (1)  | Ru53     | 783.   | RY*  | (17) | Ru52     |          | 0.13      | 12.67     | 0.038   |       |
| 164. | LP | (1)  | Ru53     | 786.   | RY*  | (20) | Ru52     |          | 0.13      | 10.45     | 0.035   |       |
| 164. | LP | (1)  | Ru53     | 789.   | RY*  | (23) | Ru52     |          | 0.18      | 10.64     | 0.042   |       |
| 164. | LP | (1)  | Ru53     | 790.   | RY*  | (24) | Ru52     |          | 0.1713605 | 1.4       | 1.418   |       |
| 164. | LP | (1)  | Ru53     | 791.   | RY*  | (25) | Ru52     |          | 0.0933394 | 5.8       | 1.633   |       |
| 164. | LP | (1)  | Ru53     | 792.   | RY*  | (26) | Ru52     |          | 0.20      | 1159.60   | 0.456   |       |
| 164. | LP | (1)  | Ru53     | 795.   | RY*  | (29) | Ru52     |          | 0.23      | 53.14     | 0.105   |       |
| 164. | LP | (1)  | Ru53     | 796.   | RY*  | (30) | Ru52     |          | 0.18      | 18.80     | 0.055   |       |
| 164. | LP | (1)  | Ru53     | 804.   | RY*  | (38) | Ru52     |          | 0.22      | 258.50    | 0.226   |       |
| 164. | LP | (1)  | Ru53     | 811.   | RY*  | (45) | Ru52     |          | 0.09      | 50.90     | 0.063   |       |
| 164. | LP | (1)  | Ru53     | 812.   | RY*  | (46) | Ru52     |          | 0.05      | 186.32    | 0.094   |       |
| 165. | LP | (2)  | Ru53     | 188.   | RY*  | (6)  | C        | 2        | 0.07      | 3.25      | 0.014   |       |
| 165. | LP | (2)  | Ru53     | 219.   | RY*  | (7)  | C        | 4        | 0.06      | 6.86      | 0.020   |       |
| 165. | LP | (2)  | Ru53     | 224.   | RY*  | (12) | C        | 7        | 0.05      | 2.97      | 0.012   |       |
| 165. | LP | (2)  | Ru53     | 263.   | RY*  | (6)  | C        | 10       | 0.05      | 4.43      | 0.015   |       |
| 165. | LP | (2)  | Ru53     | 303.   | RY*  | (1)  | C10      |          | 0.06      | 2.14      | 0.010   |       |
| 165. | LP | (2)  | Ru53     | 305.   | RY*  | (3)  | C10      |          | 0.13      | 2.88      | 0.018   |       |
| 165. | LP | (2)  | Ru53     | 309.   | RY*  | (7)  | C10      |          | 0.07      | 6.65      | 0.020   |       |
| 165. | LP | (2)  | Ru53     | 312.   | RY*  | (10) | C10      |          | 0.05      | 1.91      | 0.010   |       |
| 165. | LP | (2)  | Ru53     | 315.   | RY*  | (13) | C10      |          | 0.06      | 3.14      | 0.014   |       |
| 165. | LP | (2)  | Ru53     | 329.   | RY*  | (12) | C11      |          | 0.06      | 3.27      | 0.013   |       |
| 165. | LP | (2)  | Ru53     | 393.   | RY*  | (6)  | C15      |          | 0.09      | 3.46      | 0.017   |       |
| 165. | LP | (2)  | Ru53     | 646.   | RY*  | (4)  | O44      |          | 0.06      | 0.96      | 0.007   |       |
| 165. | LP | (2)  | Ru53     | 648.   | RY*  | (4)  | O44      |          | 0.05      | 2.71      | 0.011   |       |
| 165. | LP | (2)  | Ru53     | 738.   | RY*  | (2)  | N50      |          | 0.06      | 1.09      | 0.008   |       |
| 165. | LP | (2)  | Ru53     | 740.   | RY*  | (4)  | N50      |          | 0.07      | 5.29      | 0.019   |       |
| 165. | LP | (2)  | Ru53     | 744.   | RY*  | (8)  | N50      |          | 0.06      | 13.89     | 0.027   |       |
| 165. | LP | (2)  | Ru53     | 767.   | RY*  | (1)  | Ru52     |          | 0.22      | 7.01      | 0.038   |       |
| 165. | LP | (2)  | Ru53     | 768.   | RY*  | (2)  | Ru52     |          | 0.16      | 3.74      | 0.024   |       |
| 165. | LP | (2)  | Ru53     | 772.   | RY*  | (6)  | Ru52     |          | 0.13      | 4.60      | 0.024   |       |
| 165. | LP | (2)  | Ru53     | 773.   | RY*  | (7)  | Ru52     |          | 0.72      | 8.44      | 0.075   |       |
| 165. | LP | (2)  | Ru53     | 774.   | RY*  | (8)  | Ru52     |          | 0.45      | 3.84      | 0.040   |       |
| 165. | LP | (2)  | Ru53     | 775.   | RY*  | (9)  | Ru52     |          | 0.40      | 10.22     | 0.062   |       |
| 165. | LP | (2)  | Ru53     | 776.   | RY*  | (10) | Ru52     |          | 0.51      | 8.56      | 0.064   |       |
| 165. | LP | (2)  | Ru53     | 777.   | RY*  | (11) | Ru52     |          | 0.06      | 5.18      | 0.016   |       |
| 165. | LP | (2)  | Ru53     | 778.   | RY*  | (12) | Ru52     |          | 0.22      | 6.11      | 0.036   |       |
| 165. | LP | (2)  | Ru53     | 779.   | RY*  | (13) | Ru52     |          | 0.33      | 14.94     | 0.067   |       |

|      |    |      |      |      |         |          |           |         |       |
|------|----|------|------|------|---------|----------|-----------|---------|-------|
| 165. | LP | ( 2) | Ru53 | 780. | RY*(14) | Ru52     | 0.17      | 8.99    | 0.037 |
| 165. | LP | ( 2) | Ru53 | 781. | RY*(15) | Ru52     | 0.06      | 7.74    | 0.021 |
| 165. | LP | ( 2) | Ru53 | 783. | RY*(17) | Ru52     | 0.33      | 12.68   | 0.062 |
| 165. | LP | ( 2) | Ru53 | 785. | RY*(19) | Ru52     | 0.06      | 7.32    | 0.020 |
| 165. | LP | ( 2) | Ru53 | 786. | RY*(20) | Ru52     | 0.59      | 10.45   | 0.076 |
| 165. | LP | ( 2) | Ru53 | 788. | RY*(22) | Ru52     | 0.15      | 9.93    | 0.037 |
| 165. | LP | ( 2) | Ru53 | 789. | RY*(23) | Ru52     | 0.49      | 10.64   | 0.070 |
| 165. | LP | ( 2) | Ru53 | 790. | RY*(24) | Ru52     | 0.3713605 | 14      | 2.149 |
| 165. | LP | ( 2) | Ru53 | 791. | RY*(25) | Ru52     | 0.2033394 | 58      | 2.496 |
| 165. | LP | ( 2) | Ru53 | 792. | RY*(26) | Ru52     | 0.44      | 1159.60 | 0.690 |
| 165. | LP | ( 2) | Ru53 | 795. | RY*(29) | Ru52     | 0.53      | 53.14   | 0.161 |
| 165. | LP | ( 2) | Ru53 | 796. | RY*(30) | Ru52     | 0.38      | 18.80   | 0.081 |
| 165. | LP | ( 2) | Ru53 | 799. | RY*(33) | Ru52     | 0.08      | 88.41   | 0.080 |
| 165. | LP | ( 2) | Ru53 | 804. | RY*(38) | Ru52     | 0.49      | 258.50  | 0.341 |
| 165. | LP | ( 2) | Ru53 | 811. | RY*(45) | Ru52     | 0.53      | 50.90   | 0.159 |
| 165. | LP | ( 2) | Ru53 | 812. | RY*(46) | Ru52     | 0.33      | 186.32  | 0.239 |
| 165. | LP | ( 2) | Ru53 | 875. | BD*( 1) | C 4-Ru52 | 0.06      | 0.31    | 0.004 |
| 165. | LP | ( 2) | Ru53 | 876. | BD*( 1) | C10-Ru52 | 0.22      | 0.32    | 0.008 |
| 166. | LP | ( 3) | Ru53 | 769. | RY*( 3) | Ru52     | 0.12      | 1.81    | 0.014 |
| 166. | LP | ( 3) | Ru53 | 775. | RY*( 9) | Ru52     | 0.06      | 10.23   | 0.025 |
| 166. | LP | ( 3) | Ru53 | 792. | RY*(26) | Ru52     | 0.05      | 1159.60 | 0.238 |
| 166. | LP | ( 3) | Ru53 | 795. | RY*(29) | Ru52     | 0.07      | 53.14   | 0.062 |
| 166. | LP | ( 3) | Ru53 | 796. | RY*(30) | Ru52     | 0.06      | 18.81   | 0.033 |
| 166. | LP | ( 3) | Ru53 | 804. | RY*(38) | Ru52     | 0.06      | 258.51  | 0.118 |

within unit 2

|     |    |      |           |      |         |           |           |         |        |
|-----|----|------|-----------|------|---------|-----------|-----------|---------|--------|
| 16. | BD | ( 1) | C 6- 045  | 816. | RY*( 2) | Ru53      | 0.77      | 2.24    | 0.037  |
| 18. | BD | ( 3) | C 6- 045  | 243. | RY*( 1) | C 6       | 7.17      | 2.89    | 0.129  |
| 18. | BD | ( 3) | C 6- 045  | 245. | RY*( 3) | C 6       | 1.73      | 3.66    | 0.071  |
| 18. | BD | ( 3) | C 6- 045  | 249. | RY*( 7) | C 6       | 3.44      | 7.98    | 0.148  |
| 18. | BD | ( 3) | C 6- 045  | 251. | RY*( 9) | C 6       | 0.64      | 5.61    | 0.053  |
| 18. | BD | ( 3) | C 6- 045  | 256. | RY*(14) | C 6       | 0.68      | 46.68   | 0.159  |
| 18. | BD | ( 3) | C 6- 045  | 257. | RY*(15) | C 6       | 0.91      | 26.10   | 0.138  |
| 18. | BD | ( 3) | C 6- 045  | 428. | RY*( 6) | C18       | 1.15      | 4.05    | 0.061  |
| 18. | BD | ( 3) | C 6- 045  | 660. | RY*( 3) | O45       | 0.89      | 3.03    | 0.046  |
| 18. | BD | ( 3) | C 6- 045  | 661. | RY*( 4) | O45       | 0.58      | 1.67    | 0.028  |
| 18. | BD | ( 3) | C 6- 045  | 815. | RY*( 1) | Ru53      | 8.14      | 8.02    | 0.228  |
| 18. | BD | ( 3) | C 6- 045  | 816. | RY*( 2) | Ru53      | 5.61      | 2.89    | 0.114  |
| 18. | BD | ( 3) | C 6- 045  | 818. | RY*( 4) | Ru53      | 5.26      | 3.27    | 0.117  |
| 18. | BD | ( 3) | C 6- 045  | 819. | RY*( 5) | Ru53      | 9.54      | 7.48    | 0.239  |
| 18. | BD | ( 3) | C 6- 045  | 820. | RY*( 6) | Ru53      | 0.60      | 4.57    | 0.047  |
| 18. | BD | ( 3) | C 6- 045  | 821. | RY*( 7) | Ru53      | 1.55      | 4.07    | 0.071  |
| 18. | BD | ( 3) | C 6- 045  | 822. | RY*( 8) | Ru53      | 3.10      | 5.67    | 0.118  |
| 18. | BD | ( 3) | C 6- 045  | 823. | RY*( 9) | Ru53      | 4.95      | 10.13   | 0.200  |
| 18. | BD | ( 3) | C 6- 045  | 824. | RY*(10) | Ru53      | 2.22      | 8.10    | 0.120  |
| 18. | BD | ( 3) | C 6- 045  | 825. | RY*(11) | Ru53      | 1.49      | 7.04    | 0.091  |
| 18. | BD | ( 3) | C 6- 045  | 828. | RY*(14) | Ru53      | 1.32      | 9.70    | 0.101  |
| 18. | BD | ( 3) | C 6- 045  | 829. | RY*(15) | Ru53      | 1.37      | 8.18    | 0.094  |
| 18. | BD | ( 3) | C 6- 045  | 830. | RY*(16) | Ru53      | 0.54      | 7.48    | 0.057  |
| 18. | BD | ( 3) | C 6- 045  | 831. | RY*(17) | Ru53      | 4.98      | 13.48   | 0.232  |
| 18. | BD | ( 3) | C 6- 045  | 832. | RY*(18) | Ru53      | 0.79      | 6.27    | 0.063  |
| 18. | BD | ( 3) | C 6- 045  | 833. | RY*(19) | Ru53      | 1.77      | 8.04    | 0.107  |
| 18. | BD | ( 3) | C 6- 045  | 836. | RY*(22) | Ru53      | 7.56      | 11.62   | 0.265  |
| 18. | BD | ( 3) | C 6- 045  | 838. | RY*(24) | Ru53      | 4.2635647 | 87      | 11.017 |
| 18. | BD | ( 3) | C 6- 045  | 839. | RY*(25) | Ru53      | 5.14      | 5348.92 | 4.689  |
| 18. | BD | ( 3) | C 6- 045  | 840. | RY*(26) | Ru53      | 8.49      | 5744.54 | 6.241  |
| 18. | BD | ( 3) | C 6- 045  | 843. | RY*(29) | Ru53      | 2.51      | 11.18   | 0.150  |
| 18. | BD | ( 3) | C 6- 045  | 844. | RY*(30) | Ru53      | 5.91      | 33.47   | 0.398  |
| 18. | BD | ( 3) | C 6- 045  | 847. | RY*(33) | Ru53      | 7.86      | 278.57  | 1.323  |
| 18. | BD | ( 3) | C 6- 045  | 848. | RY*(34) | Ru53      | 0.69      | 51.97   | 0.169  |
| 18. | BD | ( 3) | C 6- 045  | 852. | RY*(38) | Ru53      | 8.37      | 356.73  | 1.545  |
| 18. | BD | ( 3) | C 6- 045  | 855. | RY*(41) | Ru53      | 3.17      | 141.68  | 0.599  |
| 18. | BD | ( 3) | C 6- 045  | 856. | RY*(42) | Ru53      | 6.92      | 3163.49 | 4.182  |
| 18. | BD | ( 3) | C 6- 045  | 859. | RY*(45) | Ru53      | 0.52      | 51.64   | 0.146  |
| 19. | BD | ( 1) | C 6- Ru53 | 243. | RY*( 1) | C 6       | 0.68      | 2.36    | 0.036  |
| 19. | BD | ( 1) | C 6- Ru53 | 257. | RY*(15) | C 6       | 0.65      | 25.57   | 0.117  |
| 19. | BD | ( 1) | C 6- Ru53 | 274. | RY*( 2) | C 8       | 1.28      | 1.63    | 0.041  |
| 19. | BD | ( 1) | C 6- Ru53 | 276. | RY*( 4) | C 8       | 2.31      | 2.74    | 0.072  |
| 19. | BD | ( 1) | C 6- Ru53 | 278. | RY*( 6) | C 8       | 1.43      | 2.58    | 0.055  |
| 19. | BD | ( 1) | C 6- Ru53 | 279. | RY*( 7) | C 8       | 1.43      | 7.11    | 0.092  |
| 19. | BD | ( 1) | C 6- Ru53 | 393. | RY*( 1) | C16       | 1.11      | 1.57    | 0.038  |
| 19. | BD | ( 1) | C 6- Ru53 | 660. | RY*( 3) | O45       | 1.66      | 2.50    | 0.059  |
| 19. | BD | ( 1) | C 6- Ru53 | 661. | RY*( 4) | O45       | 0.70      | 1.14    | 0.026  |
| 19. | BD | ( 1) | C 6- Ru53 | 815. | RY*( 1) | Ru53      | 1.56      | 7.49    | 0.098  |
| 19. | BD | ( 1) | C 6- Ru53 | 816. | RY*( 2) | Ru53      | 0.64      | 2.36    | 0.035  |
| 19. | BD | ( 1) | C 6- Ru53 | 819. | RY*( 5) | Ru53      | 0.88      | 6.95    | 0.071  |
| 19. | BD | ( 1) | C 6- Ru53 | 823. | RY*( 9) | Ru53      | 0.71      | 9.61    | 0.075  |
| 19. | BD | ( 1) | C 6- Ru53 | 828. | RY*(14) | Ru53      | 0.90      | 9.17    | 0.083  |
| 19. | BD | ( 1) | C 6- Ru53 | 831. | RY*(17) | Ru53      | 0.59      | 12.95   | 0.079  |
| 19. | BD | ( 1) | C 6- Ru53 | 835. | RY*(21) | Ru53      | 0.62      | 12.84   | 0.081  |
| 19. | BD | ( 1) | C 6- Ru53 | 836. | RY*(22) | Ru53      | 0.60      | 11.09   | 0.074  |
| 19. | BD | ( 1) | C 6- Ru53 | 843. | RY*(29) | Ru53      | 0.98      | 10.65   | 0.093  |
| 19. | BD | ( 1) | C 6- Ru53 | 844. | RY*(30) | Ru53      | 1.63      | 32.94   | 0.211  |
| 19. | BD | ( 1) | C 6- Ru53 | 847. | RY*(33) | Ru53      | 0.81      | 278.04  | 0.431  |
| 19. | BD | ( 1) | C 6- Ru53 | 852. | RY*(38) | Ru53      | 0.59      | 356.21  | 0.417  |
| 19. | BD | ( 1) | C 6- Ru53 | 905. | BD*( 3) | C 6- O45  | 0.71      | 1.11    | 0.025  |
| 19. | BD | ( 1) | C 6- Ru53 | 906. | BD*( 1) | C 6- Ru53 | 1.08      | 0.64    | 0.025  |
| 19. | BD | ( 1) | C 6- Ru53 | 907. | BD*( 1) | C 8- Ru53 | 13.06     | 0.64    | 0.086  |
| 19. | BD | ( 1) | C 6- Ru53 | 909. | BD*( 2) | C 8- O46  | 1.68      | 0.52    | 0.027  |
| 19. | BD | ( 1) | C 6- Ru53 | 910. | BD*( 3) | C 8- O46  | 2.22      | 1.13    | 0.045  |
| 19. | BD | ( 1) | C 6- Ru53 | 926. | BD*( 1) | C16- Ru53 | 13.04     | 0.53    | 0.079  |
| 19. | BD | ( 1) | C 6- Ru53 | 927. | BD*( 1) | C16- C22  | 1.99      | 1.02    | 0.041  |
| 25. | BD | ( 3) | C 8- O46  | 273. | RY*( 1) | C 8       | 6.60      | 2.82    | 0.122  |
| 25. | BD | ( 3) | C 8- O46  | 276. | RY*( 4) | C 8       | 0.85      | 3.30    | 0.047  |
| 25. | BD | ( 3) | C 8- O46  | 278. | RY*( 6) | C 8       | 0.54      | 3.14    | 0.037  |
| 25. | BD | ( 3) | C 8- O46  | 279. | RY*( 7) | C 8       | 3.38      | 7.67    | 0.144  |
| 25. | BD | ( 3) | C 8- O46  | 281. | RY*( 9) | C 8       | 0.90      | 5.45    | 0.062  |
| 25. | BD | ( 3) | C 8- O46  | 287. | RY*(15) | C 8       | 0.80      | 27.61   | 0.133  |
| 25. | BD | ( 3) | C 8- O46  | 428. | RY*( 6) | C18       | 0.91      | 4.09    | 0.055  |
| 25. | BD | ( 3) | C 8- O46  | 675. | RY*( 3) | O46       | 0.69      | 2.82    | 0.039  |
| 25. | BD | ( 3) | C 8- O46  | 676. | RY*( 4) | O46       | 0.73      | 1.80    | 0.032  |
| 25. | BD | ( 3) | C 8- O46  | 815. | RY*( 1) | Ru53      | 9.51      | 8.05    | 0.247  |
| 25. | BD | ( 3) | C 8- O46  | 816. | RY*( 2) | Ru53      | 2.24      | 2.92    | 0.072  |
| 25. | BD | ( 3) | C 8- O46  | 819. | RY*( 5) | Ru53      | 6.30      | 7.51    | 0.194  |
| 25. | BD | ( 3) | C 8- O46  | 820. | RY*( 6) | Ru53      | 2.58      | 4.60    | 0.097  |
| 25. | BD | ( 3) | C 8- O46  | 821. | RY*( 7) | Ru53      | 1.08      | 4.11    | 0.060  |
| 25. | BD | ( 3) | C 8- O46  | 822. | RY*( 8) | Ru53      | 1.55      | 5.70    | 0.084  |
| 25. | BD | ( 3) | C 8- O46  | 823. | RY*( 9) | Ru53      | 6.41      | 10.17   | 0.228  |
| 25. | BD | ( 3) | C 8- O46  | 824. | RY*(10) | Ru53      | 0.76      | 8.13    | 0.070  |
| 25. | BD | ( 3) | C 8- O46  | 826. | RY*(12) | Ru53      | 1.76      | 3.98    | 0.075  |
| 25. | BD | ( 3) | C 8- O46  | 827. | RY*(13) | Ru53      | 1.91      | 14.83   | 0.150  |
| 25. | BD | ( 3) | C 8- O46  | 829. | RY*(15) | Ru53      | 1.50      | 8.21    | 0.099  |
| 25. | BD | ( 3) | C 8- O46  | 830. | RY*(16) | Ru53      | 1.20      | 7.52    | 0.085  |
| 25. | BD | ( 3) | C 8- O46  | 831. | RY*(17) | Ru53      | 3.83      | 13.51   | 0.203  |
| 25. | BD | ( 3) | C 8- O46  | 832. | RY*(18) | Ru53      | 1.37      | 6.30    | 0.083  |
| 25. | BD | ( 3) | C 8- O46  | 836. | RY*(22) | Ru53      | 5.39      | 11.65   | 0.224  |

|     |                  |      |                   |              |        |
|-----|------------------|------|-------------------|--------------|--------|
| 25. | BD ( 3) C 8- 046 | 838. | RY*(24) Ru53      | 3.7735647.90 | 10.361 |
| 25. | BD ( 3) C 8- 046 | 839. | RY*(25) Ru53      | 4.49 5348.95 | 4.380  |
| 25. | BD ( 3) C 8- 046 | 840. | RY*(26) Ru53      | 7.47 5744.57 | 5.856  |
| 25. | BD ( 3) C 8- 046 | 843. | RY*(29) Ru53      | 1.92 11.21   | 0.131  |
| 25. | BD ( 3) C 8- 046 | 844. | RY*(30) Ru53      | 4.73 33.50   | 0.356  |
| 25. | BD ( 3) C 8- 046 | 847. | RY*(33) Ru53      | 6.84 278.60  | 1.234  |
| 25. | BD ( 3) C 8- 046 | 848. | RY*(34) Ru53      | 0.50 52.01   | 0.144  |
| 25. | BD ( 3) C 8- 046 | 852. | RY*(38) Ru53      | 7.33 356.77  | 1.445  |
| 25. | BD ( 3) C 8- 046 | 855. | RY*(41) Ru53      | 2.81 141.71  | 0.564  |
| 25. | BD ( 3) C 8- 046 | 856. | RY*(42) Ru53      | 6.10 3163.52 | 3.925  |
| 25. | BD ( 3) C 8- 046 | 859. | RY*(45) Ru53      | 0.99 51.67   | 0.202  |
| 25. | BD ( 3) C 8- 046 | 860. | RY*(46) Ru53      | 0.69 187.22  | 0.322  |
| 26. | BD ( 1) C 8-Ru53 | 167. | LP* ( 1) C16      | 0.75 0.43    | 0.021  |
| 26. | BD ( 1) C 8-Ru53 | 243. | RY* ( 1) C 6      | 0.74 2.36    | 0.038  |
| 26. | BD ( 1) C 8-Ru53 | 244. | RY* ( 2) C 6      | 2.67 1.54    | 0.058  |
| 26. | BD ( 1) C 8-Ru53 | 245. | RY* ( 3) C 6      | 3.84 3.13    | 0.100  |
| 26. | BD ( 1) C 8-Ru53 | 246. | RY* ( 4) C 6      | 0.90 2.04    | 0.039  |
| 26. | BD ( 1) C 8-Ru53 | 247. | RY* ( 5) C 6      | 0.58 2.51    | 0.035  |
| 26. | BD ( 1) C 8-Ru53 | 249. | RY* ( 7) C 6      | 1.69 7.45    | 0.102  |
| 26. | BD ( 1) C 8-Ru53 | 257. | RY*(15) C 6       | 0.73 25.57   | 0.125  |
| 26. | BD ( 1) C 8-Ru53 | 394. | RY* ( 2) C16      | 0.60 1.18    | 0.024  |
| 26. | BD ( 1) C 8-Ru53 | 675. | RY* ( 3) O46      | 1.16 2.25    | 0.047  |
| 26. | BD ( 1) C 8-Ru53 | 676. | RY* ( 4) O46      | 0.54 1.24    | 0.024  |
| 26. | BD ( 1) C 8-Ru53 | 752. | RY* ( 1) N51      | 4.17 2.32    | 0.089  |
| 26. | BD ( 1) C 8-Ru53 | 815. | RY* ( 1) Ru53     | 1.33 7.49    | 0.091  |
| 26. | BD ( 1) C 8-Ru53 | 816. | RY* ( 2) Ru53     | 0.73 2.36    | 0.038  |
| 26. | BD ( 1) C 8-Ru53 | 818. | RY* ( 4) Ru53     | 2.43 2.74    | 0.074  |
| 26. | BD ( 1) C 8-Ru53 | 819. | RY* ( 5) Ru53     | 1.01 6.95    | 0.076  |
| 26. | BD ( 1) C 8-Ru53 | 822. | RY* ( 8) Ru53     | 0.93 5.14    | 0.063  |
| 26. | BD ( 1) C 8-Ru53 | 823. | RY* ( 9) Ru53     | 1.59 9.60    | 0.113  |
| 26. | BD ( 1) C 8-Ru53 | 824. | RY*(10) Ru53      | 0.63 7.57    | 0.063  |
| 26. | BD ( 1) C 8-Ru53 | 830. | RY*(16) Ru53      | 0.61 6.95    | 0.059  |
| 26. | BD ( 1) C 8-Ru53 | 831. | RY*(17) Ru53      | 0.73 12.95   | 0.088  |
| 26. | BD ( 1) C 8-Ru53 | 832. | RY*(18) Ru53      | 0.79 5.74    | 0.061  |
| 26. | BD ( 1) C 8-Ru53 | 836. | RY*(22) Ru53      | 1.45 11.09   | 0.115  |
| 26. | BD ( 1) C 8-Ru53 | 839. | RY*(25) Ru53      | 0.70 5348.38 | 1.756  |
| 26. | BD ( 1) C 8-Ru53 | 840. | RY*(26) Ru53      | 0.71 5744.01 | 1.838  |
| 26. | BD ( 1) C 8-Ru53 | 843. | RY*(29) Ru53      | 0.97 10.65   | 0.093  |
| 26. | BD ( 1) C 8-Ru53 | 844. | RY*(30) Ru53      | 2.15 32.94   | 0.242  |
| 26. | BD ( 1) C 8-Ru53 | 847. | RY*(33) Ru53      | 1.14 278.04  | 0.512  |
| 26. | BD ( 1) C 8-Ru53 | 852. | RY*(38) Ru53      | 0.89 356.20  | 0.513  |
| 26. | BD ( 1) C 8-Ru53 | 903. | BD* ( 1) C 6- O45 | 1.16 0.53    | 0.023  |
| 26. | BD ( 1) C 8-Ru53 | 904. | BD* ( 2) C 6- O45 | 2.68 0.52    | 0.034  |
| 26. | BD ( 1) C 8-Ru53 | 905. | BD* ( 3) C 6- O45 | 1.91 1.10    | 0.042  |
| 26. | BD ( 1) C 8-Ru53 | 906. | BD* ( 1) C 6-Ru53 | 12.38 0.64   | 0.085  |
| 26. | BD ( 1) C 8-Ru53 | 907. | BD* ( 1) C 8-Ru53 | 1.25 0.63    | 0.027  |
| 26. | BD ( 1) C 8-Ru53 | 910. | BD* ( 3) C 8- O46 | 0.55 1.13    | 0.023  |
| 26. | BD ( 1) C 8-Ru53 | 913. | BD* ( 1) C12- N51 | 0.58 0.96    | 0.021  |
| 26. | BD ( 1) C 8-Ru53 | 921. | BD* ( 1) C20- N51 | 0.75 0.94    | 0.024  |
| 26. | BD ( 1) C 8-Ru53 | 926. | BD* ( 1) C16-Ru53 | 12.46 0.53   | 0.077  |
| 26. | BD ( 1) C 8-Ru53 | 927. | BD* ( 1) C16- C22 | 0.54 1.01    | 0.021  |
| 26. | BD ( 1) C 8-Ru53 | 928. | BD* ( 1) C16- C18 | 0.71 1.03    | 0.024  |
| 37. | BD ( 1) C12- C14 | 469. | RY* ( 2) C21      | 0.97 2.38    | 0.043  |
| 37. | BD ( 1) C12- C14 | 752. | RY* ( 1) N51      | 1.41 2.46    | 0.053  |
| 37. | BD ( 1) C12- C14 | 906. | BD* ( 1) C 6-Ru53 | 0.52 0.78    | 0.019  |
| 37. | BD ( 1) C12- C14 | 913. | BD* ( 1) C12- N51 | 0.51 1.10    | 0.021  |
| 37. | BD ( 1) C12- C14 | 915. | BD* ( 1) C14- C21 | 0.72 1.11    | 0.025  |
| 37. | BD ( 1) C12- C14 | 919. | BD* ( 1) C21- H37 | 2.45 1.03    | 0.045  |
| 38. | BD ( 2) C12- C14 | 470. | RY* ( 3) C21      | 0.91 0.78    | 0.026  |
| 38. | BD ( 2) C12- C14 | 753. | RY* ( 2) N51      | 0.78 1.11    | 0.029  |
| 38. | BD ( 2) C12- C14 | 912. | BD* ( 2) C12- C14 | 0.62 0.23    | 0.011  |
| 38. | BD ( 2) C12- C14 | 918. | BD* ( 2) C21- C23 | 16.58 0.23   | 0.056  |
| 38. | BD ( 2) C12- C14 | 922. | BD* ( 2) C20- N51 | 10.77 0.21   | 0.044  |
| 39. | BD ( 1) C12- H29 | 363. | RY* ( 1) C14      | 0.89 2.14    | 0.039  |
| 39. | BD ( 1) C12- H29 | 752. | RY* ( 1) N51      | 1.40 2.28    | 0.051  |
| 39. | BD ( 1) C12- H29 | 754. | RY* ( 3) N51      | 0.50 2.63    | 0.033  |
| 39. | BD ( 1) C12- H29 | 915. | BD* ( 1) C14- C21 | 3.32 0.93    | 0.050  |
| 39. | BD ( 1) C12- H29 | 921. | BD* ( 1) C20- N51 | 6.76 0.90    | 0.070  |
| 40. | BD ( 1) C12- N51 | 340. | RY* ( 8) C12      | 0.53 10.26   | 0.066  |
| 40. | BD ( 1) C12- N51 | 346. | RY*(14) C12       | 0.62 40.77   | 0.143  |
| 40. | BD ( 1) C12- N51 | 347. | RY*(15) C12       | 0.91 26.81   | 0.140  |
| 40. | BD ( 1) C12- N51 | 365. | RY* ( 3) C14      | 0.84 2.65    | 0.042  |
| 40. | BD ( 1) C12- N51 | 453. | RY* ( 1) C20      | 0.67 2.32    | 0.035  |
| 40. | BD ( 1) C12- N51 | 455. | RY* ( 3) C20      | 1.57 2.70    | 0.058  |
| 40. | BD ( 1) C12- N51 | 755. | RY* ( 4) N51      | 1.30 5.71    | 0.077  |
| 40. | BD ( 1) C12- N51 | 759. | RY* ( 8) N51      | 0.51 14.77   | 0.078  |
| 40. | BD ( 1) C12- N51 | 815. | RY* ( 1) Ru53     | 0.52 7.74    | 0.057  |
| 40. | BD ( 1) C12- N51 | 816. | RY* ( 2) Ru53     | 0.53 2.61    | 0.033  |
| 40. | BD ( 1) C12- N51 | 820. | RY* ( 6) Ru53     | 0.52 4.29    | 0.042  |
| 40. | BD ( 1) C12- N51 | 822. | RY* ( 8) Ru53     | 1.39 5.39    | 0.078  |
| 40. | BD ( 1) C12- N51 | 823. | RY* ( 9) Ru53     | 1.27 9.86    | 0.100  |
| 40. | BD ( 1) C12- N51 | 824. | RY*(10) Ru53      | 0.51 7.82    | 0.056  |
| 40. | BD ( 1) C12- N51 | 826. | RY*(12) Ru53      | 0.84 3.67    | 0.050  |
| 40. | BD ( 1) C12- N51 | 827. | RY*(13) Ru53      | 1.53 14.52   | 0.134  |
| 40. | BD ( 1) C12- N51 | 828. | RY*(14) Ru53      | 0.58 9.42    | 0.066  |
| 40. | BD ( 1) C12- N51 | 831. | RY*(17) Ru53      | 0.51 13.20   | 0.073  |
| 40. | BD ( 1) C12- N51 | 836. | RY*(22) Ru53      | 0.81 11.34   | 0.086  |
| 40. | BD ( 1) C12- N51 | 838. | RY*(24) Ru53      | 0.5635647.59 | 4.019  |
| 40. | BD ( 1) C12- N51 | 839. | RY*(25) Ru53      | 0.68 5348.64 | 1.704  |
| 40. | BD ( 1) C12- N51 | 840. | RY*(26) Ru53      | 1.12 5744.26 | 2.267  |
| 40. | BD ( 1) C12- N51 | 844. | RY*(30) Ru53      | 0.72 33.19   | 0.139  |
| 40. | BD ( 1) C12- N51 | 847. | RY*(33) Ru53      | 1.03 278.29  | 0.480  |
| 40. | BD ( 1) C12- N51 | 848. | RY*(34) Ru53      | 0.52 51.69   | 0.146  |
| 40. | BD ( 1) C12- N51 | 852. | RY*(38) Ru53      | 1.10 356.46  | 0.560  |
| 40. | BD ( 1) C12- N51 | 856. | RY*(42) Ru53      | 0.92 3163.21 | 1.527  |
| 40. | BD ( 1) C12- N51 | 906. | BD* ( 1) C 6-Ru53 | 4.24 0.89    | 0.060  |
| 40. | BD ( 1) C12- N51 | 911. | BD* ( 1) C12- C14 | 0.80 1.24    | 0.028  |
| 40. | BD ( 1) C12- N51 | 916. | BD* ( 1) C14- H31 | 1.57 1.15    | 0.038  |
| 40. | BD ( 1) C12- N51 | 921. | BD* ( 1) C20- N51 | 0.62 1.19    | 0.024  |
| 40. | BD ( 1) C12- N51 | 924. | BD* ( 1) C20- C22 | 2.75 1.19    | 0.051  |
| 43. | BD ( 1) C14- C21 | 500. | RY* ( 3) C23      | 0.94 2.31    | 0.042  |
| 43. | BD ( 1) C14- C21 | 911. | BD* ( 1) C12- C14 | 0.76 1.12    | 0.026  |
| 43. | BD ( 1) C14- C21 | 914. | BD* ( 1) C12- H29 | 2.38 1.03    | 0.044  |
| 43. | BD ( 1) C14- C21 | 917. | BD* ( 1) C21- C23 | 0.81 1.12    | 0.027  |
| 43. | BD ( 1) C14- C21 | 920. | BD* ( 1) C23- H38 | 2.50 1.03    | 0.045  |
| 44. | BD ( 1) C14- H31 | 333. | RY* ( 1) C12      | 0.64 2.03    | 0.032  |
| 44. | BD ( 1) C14- H31 | 468. | RY* ( 1) C21      | 0.84 2.22    | 0.039  |
| 44. | BD ( 1) C14- H31 | 913. | BD* ( 1) C12- N51 | 5.34 0.92    | 0.063  |
| 44. | BD ( 1) C14- H31 | 917. | BD* ( 1) C21- C23 | 3.39 0.95    | 0.051  |
| 47. | BD ( 1) C16- C18 | 395. | RY* ( 3) C16      | 0.73 1.63    | 0.031  |
| 47. | BD ( 1) C16- C18 | 396. | RY* ( 4) C16      | 1.89 2.79    | 0.065  |
| 47. | BD ( 1) C16- C18 | 401. | RY* ( 9) C16      | 0.52 13.50   | 0.075  |
| 47. | BD ( 1) C16- C18 | 428. | RY* ( 6) C18      | 1.03 3.62    | 0.055  |
| 47. | BD ( 1) C16- C18 | 435. | RY*(13) C18       | 0.60 40.65   | 0.141  |
| 47. | BD ( 1) C16- C18 | 437. | RY*(15) C18       | 0.71 27.51   | 0.126  |
| 47. | BD ( 1) C16- C18 | 483. | RY* ( 1) C22      | 1.13 1.97    | 0.042  |

|     |    |     |      |      |      |         |      |           |         |       |       |
|-----|----|-----|------|------|------|---------|------|-----------|---------|-------|-------|
| 47. | BD | (1) | C16- | C18  | 485. | RY*(3)  | C22  | 0.91      | 2.40    | 0.042 |       |
| 47. | BD | (1) | C16- | C18  | 515. | RY*(3)  | C24  | 1.36      | 2.50    | 0.052 |       |
| 47. | BD | (1) | C16- | C18  | 815. | RY*(1)  | Ru53 | 1.56      | 7.58    | 0.097 |       |
| 47. | BD | (1) | C16- | C18  | 816. | RY*(2)  | Ru53 | 2.42      | 2.45    | 0.069 |       |
| 47. | BD | (1) | C16- | C18  | 819. | RY*(5)  | Ru53 | 2.82      | 7.04    | 0.126 |       |
| 47. | BD | (1) | C16- | C18  | 821. | RY*(7)  | Ru53 | 1.24      | 3.64    | 0.060 |       |
| 47. | BD | (1) | C16- | C18  | 822. | RY*(8)  | Ru53 | 2.27      | 5.24    | 0.098 |       |
| 47. | BD | (1) | C16- | C18  | 825. | RY*(11) | Ru53 | 1.16      | 6.60    | 0.079 |       |
| 47. | BD | (1) | C16- | C18  | 826. | RY*(12) | Ru53 | 0.68      | 3.51    | 0.044 |       |
| 47. | BD | (1) | C16- | C18  | 827. | RY*(13) | Ru53 | 1.16      | 14.36   | 0.116 |       |
| 47. | BD | (1) | C16- | C18  | 829. | RY*(15) | Ru53 | 1.34      | 7.74    | 0.091 |       |
| 47. | BD | (1) | C16- | C18  | 830. | RY*(16) | Ru53 | 0.70      | 7.05    | 0.063 |       |
| 47. | BD | (1) | C16- | C18  | 831. | RY*(17) | Ru53 | 1.27      | 13.04   | 0.115 |       |
| 47. | BD | (1) | C16- | C18  | 833. | RY*(19) | Ru53 | 1.37      | 7.60    | 0.091 |       |
| 47. | BD | (1) | C16- | C18  | 836. | RY*(22) | Ru53 | 1.42      | 11.19   | 0.113 |       |
| 47. | BD | (1) | C16- | C18  | 838. | RY*(24) | Ru53 | 1.1735647 | 4.3     | 5.784 |       |
| 47. | BD | (1) | C16- | C18  | 839. | RY*(25) | Ru53 | 1.28      | 5348.48 | 2.346 |       |
| 47. | BD | (1) | C16- | C18  | 840. | RY*(26) | Ru53 | 2.25      | 5744.10 | 3.225 |       |
| 47. | BD | (1) | C16- | C18  | 841. | RY*(27) | Ru53 | 0.74      | 49.89   | 0.172 |       |
| 47. | BD | (1) | C16- | C18  | 843. | RY*(29) | Ru53 | 0.58      | 10.74   | 0.071 |       |
| 47. | BD | (1) | C16- | C18  | 844. | RY*(30) | Ru53 | 1.31      | 33.03   | 0.187 |       |
| 47. | BD | (1) | C16- | C18  | 847. | RY*(33) | Ru53 | 1.99      | 278.13  | 0.667 |       |
| 47. | BD | (1) | C16- | C18  | 852. | RY*(38) | Ru53 | 2.17      | 356.30  | 0.788 |       |
| 47. | BD | (1) | C16- | C18  | 855. | RY*(41) | Ru53 | 0.89      | 141.25  | 0.318 |       |
| 47. | BD | (1) | C16- | C18  | 856. | RY*(42) | Ru53 | 1.84      | 3163.06 | 2.163 |       |
| 47. | BD | (1) | C16- | C18  | 924. | BD*(1)  | C20- | C22       | 3.66    | 1.03  | 0.055 |
| 47. | BD | (1) | C16- | C18  | 927. | BD*(1)  | C16- | C22       | 0.66    | 1.11  | 0.024 |
| 47. | BD | (1) | C16- | C18  | 930. | BD*(1)  | C24- | H36       | 2.20    | 1.01  | 0.042 |
| 47. | BD | (1) | C16- | C18  | 931. | BD*(1)  | C18- | C24       | 1.17    | 1.09  | 0.032 |
| 47. | BD | (1) | C16- | C18  | 933. | BD*(1)  | C18- | H32       | 0.66    | 1.02  | 0.023 |
| 48. | BD | (1) | C16- | C22  | 425. | RY*(3)  | C18  | 1.40      | 2.33    | 0.051 |       |
| 48. | BD | (1) | C16- | C22  | 453. | RY*(1)  | C20  | 0.85      | 2.15    | 0.038 |       |
| 48. | BD | (1) | C16- | C22  | 487. | RY*(5)  | C22  | 0.59      | 4.58    | 0.047 |       |
| 48. | BD | (1) | C16- | C22  | 491. | RY*(9)  | C22  | 0.83      | 15.30   | 0.101 |       |
| 48. | BD | (1) | C16- | C22  | 496. | RY*(14) | C22  | 0.94      | 25.86   | 0.140 |       |
| 48. | BD | (1) | C16- | C22  | 497. | RY*(15) | C22  | 0.80      | 42.36   | 0.166 |       |
| 48. | BD | (1) | C16- | C22  | 530. | RY*(3)  | C25  | 0.81      | 2.39    | 0.039 |       |
| 48. | BD | (1) | C16- | C22  | 531. | RY*(4)  | C25  | 0.89      | 2.06    | 0.038 |       |
| 48. | BD | (1) | C16- | C22  | 533. | RY*(6)  | C25  | 0.68      | 6.45    | 0.059 |       |
| 48. | BD | (1) | C16- | C22  | 822. | RY*(8)  | Ru53 | 1.37      | 5.23    | 0.076 |       |
| 48. | BD | (1) | C16- | C22  | 827. | RY*(13) | Ru53 | 0.68      | 14.36   | 0.089 |       |
| 48. | BD | (1) | C16- | C22  | 840. | RY*(26) | Ru53 | 0.56      | 5744.09 | 1.605 |       |
| 48. | BD | (1) | C16- | C22  | 841. | RY*(27) | Ru53 | 0.53      | 49.88   | 0.146 |       |
| 48. | BD | (1) | C16- | C22  | 852. | RY*(38) | Ru53 | 0.53      | 356.29  | 0.390 |       |
| 48. | BD | (1) | C16- | C22  | 865. | BD*(1)  | C25- | H39       | 2.30    | 1.00  | 0.043 |
| 48. | BD | (1) | C16- | C22  | 913. | BD*(1)  | C12- | N51       | 0.51    | 1.04  | 0.021 |
| 48. | BD | (1) | C16- | C22  | 923. | BD*(1)  | C20- | C23       | 3.55    | 1.07  | 0.055 |
| 48. | BD | (1) | C16- | C22  | 924. | BD*(1)  | C20- | C22       | 1.01    | 1.02  | 0.029 |
| 48. | BD | (1) | C16- | C22  | 925. | BD*(1)  | C22- | C25       | 2.11    | 1.09  | 0.043 |
| 48. | BD | (1) | C16- | C22  | 928. | BD*(1)  | C16- | C18       | 0.52    | 1.11  | 0.021 |
| 48. | BD | (1) | C16- | C22  | 933. | BD*(1)  | C18- | H32       | 2.84    | 1.01  | 0.048 |
| 49. | BD | (1) | C16- | Ru53 | 244. | RY*(2)  | C6   | 0.61      | 1.38    | 0.027 |       |
| 49. | BD | (1) | C16- | Ru53 | 245. | RY*(3)  | C6   | 1.54      | 2.97    | 0.062 |       |
| 49. | BD | (1) | C16- | Ru53 | 248. | RY*(6)  | C6   | 0.57      | 2.67    | 0.036 |       |
| 49. | BD | (1) | C16- | Ru53 | 276. | RY*(4)  | C8   | 0.70      | 2.58    | 0.039 |       |
| 49. | BD | (1) | C16- | Ru53 | 423. | RY*(1)  | C18  | 0.71      | 2.00    | 0.035 |       |
| 49. | BD | (1) | C16- | Ru53 | 425. | RY*(3)  | C18  | 0.56      | 2.09    | 0.032 |       |
| 49. | BD | (1) | C16- | Ru53 | 483. | RY*(1)  | C22  | 0.71      | 1.71    | 0.032 |       |
| 49. | BD | (1) | C16- | Ru53 | 752. | RY*(1)  | N51  | 2.81      | 2.16    | 0.072 |       |
| 49. | BD | (1) | C16- | Ru53 | 815. | RY*(1)  | Ru53 | 0.73      | 7.33    | 0.068 |       |
| 49. | BD | (1) | C16- | Ru53 | 819. | RY*(5)  | Ru53 | 0.50      | 6.79    | 0.054 |       |
| 49. | BD | (1) | C16- | Ru53 | 829. | RY*(15) | Ru53 | 0.50      | 7.49    | 0.057 |       |
| 49. | BD | (1) | C16- | Ru53 | 836. | RY*(22) | Ru53 | 0.76      | 10.93   | 0.084 |       |
| 49. | BD | (1) | C16- | Ru53 | 844. | RY*(30) | Ru53 | 0.52      | 32.78   | 0.121 |       |
| 49. | BD | (1) | C16- | Ru53 | 904. | BD*(2)  | C6-  | O45       | 0.58    | 0.36  | 0.013 |
| 49. | BD | (1) | C16- | Ru53 | 905. | BD*(3)  | C6-  | O45       | 1.75    | 0.95  | 0.037 |
| 49. | BD | (1) | C16- | Ru53 | 906. | BD*(1)  | C6-  | Ru53      | 17.70   | 0.48  | 0.086 |
| 49. | BD | (1) | C16- | Ru53 | 907. | BD*(1)  | C8-  | Ru53      | 16.92   | 0.48  | 0.084 |
| 49. | BD | (1) | C16- | Ru53 | 908. | BD*(1)  | C8-  | O46       | 0.88    | 0.35  | 0.016 |
| 49. | BD | (1) | C16- | Ru53 | 910. | BD*(3)  | C8-  | O46       | 0.98    | 0.97  | 0.028 |
| 49. | BD | (1) | C16- | Ru53 | 913. | BD*(1)  | C12- | N51       | 1.79    | 0.80  | 0.035 |
| 49. | BD | (1) | C16- | Ru53 | 923. | BD*(1)  | C20- | C23       | 0.63    | 0.83  | 0.021 |
| 49. | BD | (1) | C16- | Ru53 | 924. | BD*(1)  | C20- | C22       | 0.59    | 0.78  | 0.020 |
| 49. | BD | (1) | C16- | Ru53 | 925. | BD*(1)  | C22- | C25       | 6.39    | 0.84  | 0.067 |
| 49. | BD | (1) | C16- | Ru53 | 926. | BD*(1)  | C16- | Ru53      | 2.75    | 0.37  | 0.030 |
| 49. | BD | (1) | C16- | Ru53 | 931. | BD*(1)  | C18- | C24       | 5.47    | 0.84  | 0.062 |
| 49. | BD | (1) | C16- | Ru53 | 933. | BD*(1)  | C18- | H32       | 0.85    | 0.77  | 0.023 |
| 53. | BD | (1) | C18- | C24  | 393. | RY*(1)  | C16  | 0.92      | 1.67    | 0.035 |       |
| 53. | BD | (1) | C18- | C24  | 545. | RY*(3)  | C26  | 1.00      | 2.54    | 0.045 |       |
| 53. | BD | (1) | C18- | C24  | 866. | BD*(1)  | C26- | H40       | 2.36    | 1.02  | 0.044 |
| 53. | BD | (1) | C18- | C24  | 926. | BD*(1)  | C16- | Ru53      | 3.81    | 0.63  | 0.047 |
| 53. | BD | (1) | C18- | C24  | 928. | BD*(1)  | C16- | C18       | 1.39    | 1.13  | 0.035 |
| 53. | BD | (1) | C18- | C24  | 929. | BD*(1)  | C24- | C26       | 0.76    | 1.09  | 0.026 |
| 54. | BD | (2) | C18- | C24  | 167. | LF*(1)  | C16  | 39.91     | 0.13    | 0.075 |       |
| 54. | BD | (2) | C18- | C24  | 394. | RY*(2)  | C16  | 0.76      | 0.87    | 0.025 |       |
| 54. | BD | (2) | C18- | C24  | 424. | RY*(2)  | C18  | 0.60      | 0.71    | 0.020 |       |
| 54. | BD | (2) | C18- | C24  | 544. | RY*(2)  | C26  | 0.85      | 0.74    | 0.025 |       |
| 54. | BD | (2) | C18- | C24  | 864. | BD*(2)  | C25- | C26       | 14.50   | 0.22  | 0.051 |
| 55. | BD | (1) | C18- | H32  | 393. | RY*(1)  | C16  | 1.50      | 1.49    | 0.042 |       |
| 55. | BD | (1) | C18- | H32  | 513. | RY*(1)  | C24  | 0.96      | 2.04    | 0.040 |       |
| 55. | BD | (1) | C18- | H32  | 519. | RY*(7)  | C24  | 3.76      | 6.66    | 0.053 |       |
| 55. | BD | (1) | C18- | H32  | 927. | BD*(1)  | C16- | C22       | 3.76    | 0.94  | 0.053 |
| 55. | BD | (1) | C18- | H32  | 929. | BD*(1)  | C24- | C26       | 3.75    | 0.92  | 0.052 |
| 57. | BD | (1) | C20- | C22  | 393. | RY*(1)  | C16  | 0.97      | 1.65    | 0.036 |       |
| 57. | BD | (1) | C20- | C22  | 498. | RY*(1)  | C23  | 0.80      | 2.14    | 0.037 |       |
| 57. | BD | (1) | C20- | C22  | 528. | RY*(1)  | C25  | 0.90      | 2.15    | 0.039 |       |
| 57. | BD | (1) | C20- | C22  | 752. | RY*(1)  | N51  | 0.73      | 2.40    | 0.038 |       |
| 57. | BD | (1) | C20- | C22  | 863. | BD*(1)  | C25- | C26       | 2.10    | 1.09  | 0.043 |
| 57. | BD | (1) | C20- | C22  | 913. | BD*(1)  | C12- | N51       | 4.68    | 1.04  | 0.062 |
| 57. | BD | (1) | C20- | C22  | 917. | BD*(1)  | C21- | C23       | 2.02    | 1.06  | 0.042 |
| 57. | BD | (1) | C20- | C22  | 923. | BD*(1)  | C20- | C23       | 0.99    | 1.06  | 0.029 |
| 57. | BD | (1) | C20- | C22  | 925. | BD*(1)  | C22- | C25       | 0.88    | 1.08  | 0.028 |
| 57. | BD | (1) | C20- | C22  | 927. | BD*(1)  | C16- | C22       | 1.03    | 1.09  | 0.030 |
| 57. | BD | (1) | C20- | C22  | 928. | BD*(1)  | C16- | C18       | 2.57    | 1.11  | 0.048 |
| 58. | BD | (1) | C20- | C23  | 469. | RY*(2)  | C21  | 1.53      | 2.37    | 0.054 |       |
| 58. | BD | (1) | C20- | C23  | 485. | RY*(3)  | C22  | 0.91      | 2.44    | 0.042 |       |
| 58. | BD | (1) | C20- | C23  | 752. | RY*(1)  | N51  | 0.51      | 2.45    | 0.032 |       |
| 58. | BD | (1) | C20- | C23  | 917. | BD*(1)  | C21- | C23       | 0.92    | 1.11  | 0.029 |
| 58. | BD | (1) | C20- | C23  | 919. | BD*(1)  | C21- | H37       | 2.33    | 1.02  | 0.044 |
| 58. | BD | (1) | C20- | C23  | 921. | BD*(1)  | C20- | N51       | 0.52    | 1.07  | 0.021 |
| 58. | BD | (1) | C20- | C23  | 924. | BD*(1)  | C20- | C22       | 1.11    | 1.07  | 0.031 |
| 58. | BD | (1) | C20- | C23  | 927. | BD*(1)  | C16- | C22       | 2.15    | 1.15  | 0.044 |
| 59. | BD | (1) | C20- | N51  | 335. | RY*(3)  | C12  | 2.39      | 2.56    | 0.070 |       |
| 59. | BD | (1) | C20- | N51  | 461. | RY*(9)  | C20  | 0.66      | 11.43   | 0.078 |       |
| 59. | BD | (1) | C20- | N51  | 463. | RY*(11) | C20  | 0.58      | 6.21    | 0.054 |       |
| 59. | BD | (1) | C20- | N51  | 465. | RY*(13) | C20  | 1.04      | 24.19   | 0.142 |       |

Electronic Supplementary Information for Dalton Transactions  
This journal is © The Royal Society of Chemistry 2009

|     |    |      |          |      |         |           |       |       |       |
|-----|----|------|----------|------|---------|-----------|-------|-------|-------|
| 59. | BD | ( 1) | C20- N51 | 467. | RY*(15) | C20       | 0.78  | 42.98 | 0.164 |
| 59. | BD | ( 1) | C20- N51 | 503. | RY*( 6) | C23       | 0.53  | 7.31  | 0.056 |
| 59. | BD | ( 1) | C20- N51 | 505. | RY*( 8) | C23       | 0.64  | 3.95  | 0.045 |
| 59. | BD | ( 1) | C20- N51 | 754. | RY*( 3) | N51       | 1.10  | 2.90  | 0.051 |
| 59. | BD | ( 1) | C20- N51 | 822. | RY*( 8) | Ru53      | 0.92  | 5.38  | 0.063 |
| 59. | BD | ( 1) | C20- N51 | 826. | RY*(12) | Ru53      | 0.57  | 3.65  | 0.041 |
| 59. | BD | ( 1) | C20- N51 | 827. | RY*(13) | Ru53      | 0.83  | 14.50 | 0.099 |
| 59. | BD | ( 1) | C20- N51 | 906. | BD*( 1) | C 6- Ru53 | 4.95  | 0.87  | 0.064 |
| 59. | BD | ( 1) | C20- N51 | 914. | BD*( 1) | C12- H29  | 1.90  | 1.13  | 0.041 |
| 59. | BD | ( 1) | C20- N51 | 920. | BD*( 1) | C23- H38  | 1.63  | 1.13  | 0.038 |
| 59. | BD | ( 1) | C20- N51 | 923. | BD*( 1) | C20- C23  | 1.04  | 1.22  | 0.032 |
| 59. | BD | ( 1) | C20- N51 | 924. | BD*( 1) | C20- C22  | 0.63  | 1.17  | 0.024 |
| 59. | BD | ( 1) | C20- N51 | 925. | BD*( 1) | C22- C25  | 2.35  | 1.24  | 0.048 |
| 60. | BD | ( 2) | C20- N51 | 147. | LP ( 1) | C22       | 13.15 | 0.19  | 0.057 |
| 60. | BD | ( 2) | C20- N51 | 334. | RY*( 2) | C12       | 2.60  | 0.95  | 0.048 |
| 60. | BD | ( 2) | C20- N51 | 484. | RY*( 2) | C22       | 0.75  | 0.83  | 0.024 |
| 60. | BD | ( 2) | C20- N51 | 499. | RY*( 2) | C23       | 0.92  | 0.77  | 0.026 |
| 60. | BD | ( 2) | C20- N51 | 817. | RY*( 3) | Ru53      | 0.96  | 1.42  | 0.036 |
| 60. | BD | ( 2) | C20- N51 | 912. | BD*( 2) | C12- C14  | 20.03 | 0.28  | 0.067 |
| 60. | BD | ( 2) | C20- N51 | 918. | BD*( 2) | C21- C23  | 7.52  | 0.27  | 0.041 |
| 61. | BD | ( 1) | C21- C23 | 365. | RY*( 3) | C14       | 0.87  | 2.54  | 0.042 |
| 61. | BD | ( 1) | C21- C23 | 453. | RY*( 1) | C20       | 0.69  | 2.21  | 0.035 |
| 61. | BD | ( 1) | C21- C23 | 915. | BD*( 1) | C14- C21  | 0.77  | 1.11  | 0.026 |
| 61. | BD | ( 1) | C21- C23 | 916. | BD*( 1) | C14- H31  | 2.45  | 1.04  | 0.045 |
| 61. | BD | ( 1) | C21- C23 | 923. | BD*( 1) | C20- C23  | 1.08  | 1.13  | 0.031 |
| 61. | BD | ( 1) | C21- C23 | 924. | BD*( 1) | C20- C22  | 3.57  | 1.08  | 0.056 |
| 62. | BD | ( 2) | C21- C23 | 364. | RY*( 2) | C14       | 1.07  | 0.81  | 0.029 |
| 62. | BD | ( 2) | C21- C23 | 912. | BD*( 2) | C12- C14  | 12.37 | 0.23  | 0.048 |
| 62. | BD | ( 2) | C21- C23 | 922. | BD*( 2) | C20- N51  | 22.54 | 0.21  | 0.064 |
| 63. | BD | ( 1) | C21- H37 | 363. | RY*( 1) | C14       | 0.87  | 2.15  | 0.039 |
| 63. | BD | ( 1) | C21- H37 | 498. | RY*( 1) | C23       | 0.89  | 2.03  | 0.038 |
| 63. | BD | ( 1) | C21- H37 | 911. | BD*( 1) | C12- C14  | 3.37  | 0.95  | 0.051 |
| 63. | BD | ( 1) | C21- H37 | 923. | BD*( 1) | C20- C23  | 3.87  | 0.95  | 0.054 |
| 64. | BD | ( 1) | C22- C25 | 395. | RY*( 3) | C16       | 0.68  | 1.63  | 0.030 |
| 64. | BD | ( 1) | C22- C25 | 455. | RY*( 3) | C20       | 1.23  | 2.54  | 0.050 |
| 64. | BD | ( 1) | C22- C25 | 545. | RY*( 3) | C26       | 1.70  | 2.54  | 0.059 |
| 64. | BD | ( 1) | C22- C25 | 863. | BD*( 1) | C25- C26  | 1.02  | 1.11  | 0.030 |
| 64. | BD | ( 1) | C22- C25 | 866. | BD*( 1) | C26- H40  | 2.32  | 1.02  | 0.043 |
| 64. | BD | ( 1) | C22- C25 | 921. | BD*( 1) | C20- N51  | 2.81  | 1.04  | 0.048 |
| 64. | BD | ( 1) | C22- C25 | 924. | BD*( 1) | C20- C22  | 1.00  | 1.04  | 0.029 |
| 64. | BD | ( 1) | C22- C25 | 926. | BD*( 1) | C16- Ru53 | 3.40  | 0.63  | 0.044 |
| 64. | BD | ( 1) | C22- C25 | 927. | BD*( 1) | C16- C22  | 2.14  | 1.12  | 0.044 |
| 65. | BD | ( 1) | C23- H38 | 453. | RY*( 1) | C20       | 1.01  | 2.04  | 0.041 |
| 65. | BD | ( 1) | C23- H38 | 468. | RY*( 1) | C21       | 0.89  | 2.23  | 0.040 |
| 65. | BD | ( 1) | C23- H38 | 915. | BD*( 1) | C14- C21  | 3.48  | 0.94  | 0.051 |
| 65. | BD | ( 1) | C23- H38 | 921. | BD*( 1) | C20- N51  | 5.74  | 0.91  | 0.065 |
| 66. | BD | ( 1) | C24- C26 | 426. | RY*( 4) | C18       | 0.66  | 1.64  | 0.029 |
| 66. | BD | ( 1) | C24- C26 | 530. | RY*( 3) | C25       | 0.97  | 2.40  | 0.043 |
| 66. | BD | ( 1) | C24- C26 | 863. | BD*( 1) | C25- C26  | 0.95  | 1.11  | 0.029 |
| 66. | BD | ( 1) | C24- C26 | 865. | BD*( 1) | C25- H39  | 2.54  | 1.01  | 0.045 |
| 66. | BD | ( 1) | C24- C26 | 931. | BD*( 1) | C18- C24  | 0.81  | 1.10  | 0.027 |
| 66. | BD | ( 1) | C24- C26 | 933. | BD*( 1) | C18- H32  | 2.17  | 1.03  | 0.042 |
| 67. | BD | ( 1) | C24- H36 | 423. | RY*( 1) | C18       | 0.93  | 2.09  | 0.040 |
| 67. | BD | ( 1) | C24- H36 | 543. | RY*( 1) | C26       | 0.92  | 2.14  | 0.040 |
| 67. | BD | ( 1) | C24- H36 | 863. | BD*( 1) | C25- C26  | 3.66  | 0.94  | 0.053 |
| 67. | BD | ( 1) | C24- H36 | 928. | BD*( 1) | C16- C18  | 4.78  | 0.96  | 0.061 |
| 68. | BD | ( 1) | C25- C26 | 483. | RY*( 1) | C22       | 0.71  | 1.98  | 0.034 |
| 68. | BD | ( 1) | C25- C26 | 515. | RY*( 3) | C24       | 1.01  | 2.52  | 0.045 |
| 68. | BD | ( 1) | C25- C26 | 924. | BD*( 1) | C20- C22  | 3.44  | 1.05  | 0.054 |
| 68. | BD | ( 1) | C25- C26 | 925. | BD*( 1) | C22- C25  | 1.27  | 1.11  | 0.034 |
| 68. | BD | ( 1) | C25- C26 | 929. | BD*( 1) | C24- C26  | 0.87  | 1.10  | 0.028 |
| 68. | BD | ( 1) | C25- C26 | 930. | BD*( 1) | C24- H36  | 2.31  | 1.03  | 0.044 |
| 69. | BD | ( 2) | C25- C26 | 147. | LP ( 1) | C22       | 34.72 | 0.12  | 0.073 |
| 69. | BD | ( 2) | C25- C26 | 484. | RY*( 2) | C22       | 0.62  | 0.76  | 0.021 |
| 69. | BD | ( 2) | C25- C26 | 514. | RY*( 2) | C24       | 0.80  | 0.75  | 0.024 |
| 69. | BD | ( 2) | C25- C26 | 932. | BD*( 2) | C18- C24  | 15.14 | 0.23  | 0.053 |
| 70. | BD | ( 1) | C25- H39 | 483. | RY*( 1) | C22       | 1.19  | 1.82  | 0.042 |
| 70. | BD | ( 1) | C25- H39 | 543. | RY*( 1) | C26       | 0.97  | 2.15  | 0.041 |
| 70. | BD | ( 1) | C25- H39 | 927. | BD*( 1) | C16- C22  | 4.94  | 0.96  | 0.062 |
| 70. | BD | ( 1) | C25- H39 | 929. | BD*( 1) | C24- C26  | 3.56  | 0.94  | 0.052 |
| 71. | BD | ( 1) | C26- H40 | 513. | RY*( 1) | C24       | 0.96  | 2.05  | 0.040 |
| 71. | BD | ( 1) | C26- H40 | 528. | RY*( 1) | C25       | 0.96  | 2.01  | 0.039 |
| 71. | BD | ( 1) | C26- H40 | 925. | BD*( 1) | C22- C25  | 4.05  | 0.94  | 0.055 |
| 71. | BD | ( 1) | C26- H40 | 931. | BD*( 1) | C18- C24  | 3.73  | 0.94  | 0.053 |
| 78. | CR | ( 1) | C 6      | 661. | RY*( 4) | O45       | 0.91  | 10.50 | 0.087 |
| 80. | CR | ( 1) | C 8      | 676. | RY*( 4) | O46       | 0.88  | 10.60 | 0.086 |
| 84. | CR | ( 1) | C12      | 363. | RY*( 1) | C14       | 0.71  | 11.48 | 0.080 |
| 84. | CR | ( 1) | C12      | 365. | RY*( 3) | C14       | 0.66  | 11.70 | 0.078 |
| 84. | CR | ( 1) | C12      | 921. | BD*( 1) | C20- N51  | 1.04  | 10.24 | 0.093 |
| 86. | CR | ( 1) | C14      | 335. | RY*( 3) | C12       | 0.63  | 11.59 | 0.076 |
| 86. | CR | ( 1) | C14      | 336. | RY*( 4) | C12       | 0.86  | 11.08 | 0.087 |
| 86. | CR | ( 1) | C14      | 469. | RY*( 2) | C21       | 1.02  | 11.51 | 0.097 |
| 86. | CR | ( 1) | C14      | 913. | BD*( 1) | C12- N51  | 0.70  | 10.23 | 0.076 |
| 88. | CR | ( 1) | C16      | 423. | RY*( 1) | C18       | 0.53  | 11.42 | 0.069 |
| 88. | CR | ( 1) | C16      | 425. | RY*( 3) | C18       | 0.98  | 11.51 | 0.095 |
| 88. | CR | ( 1) | C16      | 483. | RY*( 1) | C22       | 0.55  | 11.13 | 0.070 |
| 88. | CR | ( 1) | C16      | 485. | RY*( 3) | C22       | 0.86  | 11.57 | 0.089 |
| 88. | CR | ( 1) | C16      | 924. | BD*( 1) | C20- C22  | 0.67  | 10.20 | 0.074 |
| 88. | CR | ( 1) | C16      | 925. | BD*( 1) | C22- C25  | 0.73  | 10.26 | 0.078 |
| 88. | CR | ( 1) | C16      | 926. | BD*( 1) | C16- Ru53 | 0.54  | 9.79  | 0.070 |
| 88. | CR | ( 1) | C16      | 931. | BD*( 1) | C18- C24  | 0.58  | 10.26 | 0.069 |
| 90. | CR | ( 1) | C18      | 395. | RY*( 3) | C16       | 1.00  | 10.77 | 0.093 |
| 90. | CR | ( 1) | C18      | 515. | RY*( 3) | C24       | 0.93  | 11.65 | 0.093 |
| 90. | CR | ( 1) | C18      | 926. | BD*( 1) | C16- Ru53 | 0.82  | 9.77  | 0.087 |
| 92. | CR | ( 1) | C20      | 483. | RY*( 1) | C22       | 0.53  | 11.19 | 0.069 |
| 92. | CR | ( 1) | C20      | 498. | RY*( 1) | C23       | 0.60  | 11.37 | 0.074 |
| 92. | CR | ( 1) | C20      | 754. | RY*( 3) | N51       | 0.53  | 11.98 | 0.071 |
| 92. | CR | ( 1) | C20      | 913. | BD*( 1) | C12- N51  | 0.91  | 10.27 | 0.087 |
| 92. | CR | ( 1) | C20      | 925. | BD*( 1) | C22- C25  | 0.61  | 10.32 | 0.072 |
| 92. | CR | ( 1) | C20      | 927. | BD*( 1) | C16- C22  | 0.59  | 10.33 | 0.071 |
| 93. | CR | ( 1) | C21      | 365. | RY*( 3) | C14       | 1.35  | 11.68 | 0.112 |
| 93. | CR | ( 1) | C21      | 500. | RY*( 3) | C23       | 1.33  | 11.45 | 0.110 |
| 93. | CR | ( 1) | C21      | 923. | BD*( 1) | C20- C23  | 0.50  | 10.26 | 0.065 |
| 94. | CR | ( 1) | C22      | 395. | RY*( 3) | C16       | 0.74  | 10.79 | 0.080 |
| 94. | CR | ( 1) | C22      | 453. | RY*( 1) | C20       | 0.55  | 11.32 | 0.070 |
| 94. | CR | ( 1) | C22      | 528. | RY*( 1) | C25       | 0.52  | 11.32 | 0.068 |
| 94. | CR | ( 1) | C22      | 530. | RY*( 3) | C25       | 0.62  | 11.55 | 0.075 |
| 94. | CR | ( 1) | C22      | 921. | BD*( 1) | C20- N51  | 0.51  | 10.19 | 0.065 |
| 94. | CR | ( 1) | C22      | 923. | BD*( 1) | C20- C23  | 0.78  | 10.24 | 0.081 |
| 94. | CR | ( 1) | C22      | 926. | BD*( 1) | C16- Ru53 | 0.62  | 9.78  | 0.075 |
| 95. | CR | ( 1) | C23      | 455. | RY*( 3) | C20       | 1.17  | 11.72 | 0.104 |
| 95. | CR | ( 1) | C23      | 469. | RY*( 2) | C21       | 1.19  | 11.51 | 0.105 |
| 95. | CR | ( 1) | C23      | 921. | BD*( 1) | C20- N51  | 0.69  | 10.21 | 0.076 |
| 95. | CR | ( 1) | C23      | 924. | BD*( 1) | C20- C22  | 0.91  | 10.21 | 0.087 |
| 96. | CR | ( 1) | C24      | 425. | RY*( 3) | C18       | 0.86  | 11.50 | 0.089 |
| 96. | CR | ( 1) | C24      | 426. | RY*( 4) | C18       | 0.61  | 10.79 | 0.072 |

|      |    |      |      |      |         |           |         |         |       |
|------|----|------|------|------|---------|-----------|---------|---------|-------|
| 96.  | CR | (1)  | C24  | 545. | RY*(3)  | C26       | 0.85    | 11.68   | 0.089 |
| 96.  | CR | (1)  | C24  | 928. | BD*(1)  | C16- C18  | 0.83    | 10.27   | 0.083 |
| 97.  | CR | (1)  | C25  | 485. | RY*(3)  | C22       | 0.95    | 11.56   | 0.094 |
| 97.  | CR | (1)  | C25  | 545. | RY*(3)  | C26       | 1.27    | 11.69   | 0.109 |
| 97.  | CR | (1)  | C25  | 924. | BD*(1)  | C20- C22  | 0.77    | 10.19   | 0.080 |
| 97.  | CR | (1)  | C25  | 927. | BD*(1)  | C16- C22  | 0.89    | 10.27   | 0.086 |
| 98.  | CR | (1)  | C26  | 515. | RY*(3)  | C24       | 1.26    | 11.65   | 0.108 |
| 98.  | CR | (1)  | C26  | 530. | RY*(3)  | C25       | 1.29    | 11.54   | 0.109 |
| 98.  | CR | (1)  | C26  | 925. | BD*(1)  | C22- C25  | 0.58    | 10.25   | 0.069 |
| 100. | CR | (1)  | O45  | 243. | RY*(1)  | C 6       | 4.93    | 20.42   | 0.284 |
| 100. | CR | (1)  | O45  | 906. | BD*(1)  | C 6-Ru53  | 0.62    | 18.70   | 0.105 |
| 101. | CR | (1)  | O46  | 273. | RY*(1)  | C 8       | 4.88    | 20.31   | 0.282 |
| 101. | CR | (1)  | O46  | 907. | BD*(1)  | C 8-Ru53  | 0.66    | 18.69   | 0.107 |
| 110. | CR | (1)  | N51  | 333. | RY*(1)  | C12       | 0.94    | 15.43   | 0.108 |
| 110. | CR | (1)  | N51  | 335. | RY*(3)  | C12       | 0.94    | 15.69   | 0.109 |
| 110. | CR | (1)  | N51  | 453. | RY*(1)  | C20       | 1.00    | 15.43   | 0.111 |
| 110. | CR | (1)  | N51  | 455. | RY*(3)  | C20       | 0.93    | 15.81   | 0.108 |
| 110. | CR | (1)  | N51  | 906. | BD*(1)  | C 6-Ru53  | 4.42    | 14.00   | 0.242 |
| 129. | CR | (1)  | Ru53 | 847. | RY*(33) | Ru53      | 0.67    | 904.54  | 0.693 |
| 130. | CR | (2)  | Ru53 | 847. | RY*(33) | Ru53      | 0.90    | 590.36  | 0.649 |
| 130. | CR | (2)  | Ru53 | 852. | RY*(38) | Ru53      | 0.54    | 668.53  | 0.537 |
| 130. | CR | (2)  | Ru53 | 905. | BD*(3)  | C 6- O45  | 0.73    | 313.43  | 0.431 |
| 130. | CR | (2)  | Ru53 | 910. | BD*(3)  | C 8- O46  | 0.70    | 313.45  | 0.419 |
| 131. | CR | (3)  | Ru53 | 815. | RY*(1)  | Ru53      | 1.33    | 28.83   | 0.175 |
| 131. | CR | (3)  | Ru53 | 819. | RY*(5)  | Ru53      | 0.81    | 28.29   | 0.135 |
| 131. | CR | (3)  | Ru53 | 822. | RY*(8)  | Ru53      | 0.59    | 26.49   | 0.111 |
| 131. | CR | (3)  | Ru53 | 823. | RY*(9)  | Ru53      | 1.51    | 30.95   | 0.193 |
| 131. | CR | (3)  | Ru53 | 827. | RY*(13) | Ru53      | 0.84    | 35.61   | 0.154 |
| 131. | CR | (3)  | Ru53 | 831. | RY*(17) | Ru53      | 1.16    | 34.29   | 0.178 |
| 131. | CR | (3)  | Ru53 | 836. | RY*(22) | Ru53      | 2.16    | 32.43   | 0.236 |
| 131. | CR | (3)  | Ru53 | 840. | RY*(26) | Ru53      | 1.66    | 5765.35 | 2.764 |
| 131. | CR | (3)  | Ru53 | 843. | RY*(29) | Ru53      | 0.69    | 31.99   | 0.132 |
| 131. | CR | (3)  | Ru53 | 844. | RY*(30) | Ru53      | 4.25    | 54.28   | 0.429 |
| 131. | CR | (3)  | Ru53 | 847. | RY*(33) | Ru53      | 5.11    | 299.38  | 1.104 |
| 131. | CR | (3)  | Ru53 | 852. | RY*(38) | Ru53      | 1.48    | 377.55  | 0.668 |
| 131. | CR | (3)  | Ru53 | 855. | RY*(41) | Ru53      | 1.13    | 162.49  | 0.383 |
| 131. | CR | (3)  | Ru53 | 905. | BD*(3)  | C 6- O45  | 3.84    | 22.45   | 0.264 |
| 131. | CR | (3)  | Ru53 | 910. | BD*(3)  | C 8- O46  | 3.62    | 22.47   | 0.255 |
| 131. | CR | (3)  | Ru53 | 913. | BD*(1)  | C12- N51  | 0.82    | 22.30   | 0.121 |
| 131. | CR | (3)  | Ru53 | 921. | BD*(1)  | C20- N51  | 0.64    | 22.28   | 0.108 |
| 131. | CR | (3)  | Ru53 | 926. | BD*(1)  | C16- Ru53 | 0.86    | 21.87   | 0.132 |
| 131. | CR | (3)  | Ru53 | 927. | BD*(1)  | C16- C22  | 0.65    | 22.36   | 0.108 |
| 131. | CR | (3)  | Ru53 | 928. | BD*(1)  | C16- C18  | 1.45    | 22.37   | 0.162 |
| 132. | CR | (4)  | Ru53 | 243. | RY*(1)  | C 6       | 3.49    | 6.44    | 0.134 |
| 132. | CR | (4)  | Ru53 | 273. | RY*(1)  | C 8       | 3.06    | 6.34    | 0.124 |
| 132. | CR | (4)  | Ru53 | 393. | RY*(1)  | C16       | 0.62    | 5.65    | 0.053 |
| 132. | CR | (4)  | Ru53 | 815. | RY*(1)  | Ru53      | 0.79    | 11.57   | 0.086 |
| 132. | CR | (4)  | Ru53 | 819. | RY*(5)  | Ru53      | 0.73    | 11.04   | 0.081 |
| 132. | CR | (4)  | Ru53 | 822. | RY*(8)  | Ru53      | 0.51    | 9.23    | 0.062 |
| 132. | CR | (4)  | Ru53 | 823. | RY*(9)  | Ru53      | 0.86    | 13.69   | 0.097 |
| 132. | CR | (4)  | Ru53 | 827. | RY*(13) | Ru53      | 0.58    | 18.36   | 0.093 |
| 132. | CR | (4)  | Ru53 | 831. | RY*(17) | Ru53      | 0.86    | 17.03   | 0.108 |
| 132. | CR | (4)  | Ru53 | 836. | RY*(22) | Ru53      | 1.38    | 15.18   | 0.130 |
| 132. | CR | (4)  | Ru53 | 840. | RY*(26) | Ru53      | 0.91    | 5748.09 | 2.053 |
| 132. | CR | (4)  | Ru53 | 844. | RY*(30) | Ru53      | 1.44    | 37.03   | 0.207 |
| 132. | CR | (4)  | Ru53 | 847. | RY*(33) | Ru53      | 1.51    | 282.12  | 0.584 |
| 132. | CR | (4)  | Ru53 | 852. | RY*(38) | Ru53      | 1.04    | 360.29  | 0.547 |
| 132. | CR | (4)  | Ru53 | 905. | BD*(3)  | C 6- O45  | 10.85   | 5.19    | 0.212 |
| 132. | CR | (4)  | Ru53 | 910. | BD*(3)  | C 8- O46  | 10.45   | 5.22    | 0.208 |
| 132. | CR | (4)  | Ru53 | 913. | BD*(1)  | C12- N51  | 2.44    | 5.04    | 0.099 |
| 132. | CR | (4)  | Ru53 | 921. | BD*(1)  | C20- N51  | 1.95    | 5.03    | 0.089 |
| 132. | CR | (4)  | Ru53 | 926. | BD*(1)  | C16- Ru53 | 2.61    | 4.61    | 0.106 |
| 132. | CR | (4)  | Ru53 | 927. | BD*(1)  | C16- C22  | 1.63    | 5.10    | 0.082 |
| 132. | CR | (4)  | Ru53 | 928. | BD*(1)  | C16- C18  | 3.96    | 5.11    | 0.127 |
| 135. | CR | (7)  | Ru53 | 905. | BD*(3)  | C 6- O45  | 1.90    | 2.42    | 0.061 |
| 135. | CR | (7)  | Ru53 | 906. | BD*(1)  | C 6-Ru53  | 3.59    | 1.95    | 0.081 |
| 135. | CR | (7)  | Ru53 | 907. | BD*(1)  | C 8-Ru53  | 1.73    | 1.95    | 0.056 |
| 135. | CR | (7)  | Ru53 | 910. | BD*(3)  | C 8- O46  | 1.00    | 2.44    | 0.044 |
| 138. | CR | (10) | Ru53 | 904. | BD*(2)  | C 6- O45  | 1.00    | 1.84    | 0.040 |
| 138. | CR | (10) | Ru53 | 906. | BD*(1)  | C 6-Ru53  | 1.61    | 1.95    | 0.054 |
| 138. | CR | (10) | Ru53 | 907. | BD*(1)  | C 8-Ru53  | 4.22    | 1.95    | 0.088 |
| 138. | CR | (10) | Ru53 | 910. | BD*(3)  | C 8- O46  | 1.31    | 2.44    | 0.051 |
| 138. | CR | (10) | Ru53 | 926. | BD*(1)  | C16- Ru53 | 2.01    | 1.84    | 0.059 |
| 141. | CR | (13) | Ru53 | 903. | BD*(1)  | C 6- O45  | 0.91    | 1.84    | 0.039 |
| 141. | CR | (13) | Ru53 | 906. | BD*(1)  | C 6-Ru53  | 0.96    | 1.95    | 0.042 |
| 141. | CR | (13) | Ru53 | 907. | BD*(1)  | C 8-Ru53  | 0.58    | 1.95    | 0.032 |
| 141. | CR | (13) | Ru53 | 926. | BD*(1)  | C16- Ru53 | 5.29    | 1.84    | 0.095 |
| 147. | LP | (1)  | C22  | 167. | LP*(1)  | C16       | 1023.10 | 0.02    | 0.114 |
| 147. | LP | (1)  | C22  | 394. | RY*(2)  | C16       | 0.96    | 0.76    | 0.033 |
| 147. | LP | (1)  | C22  | 457. | RY*(5)  | C20       | 0.79    | 1.86    | 0.047 |
| 147. | LP | (1)  | C22  | 484. | RY*(2)  | C22       | 2.53    | 0.64    | 0.049 |
| 147. | LP | (1)  | C22  | 529. | RY*(2)  | C25       | 2.87    | 0.61    | 0.051 |
| 147. | LP | (1)  | C22  | 864. | BD*(2)  | C25- C26  | 57.10   | 0.11    | 0.085 |
| 147. | LP | (1)  | C22  | 922. | BD*(2)  | C20- N51  | 124.88  | 0.06    | 0.088 |
| 147. | LP | (1)  | C22  | 932. | BD*(2)  | C18- C24  | 0.74    | 0.12    | 0.010 |
| 149. | LP | (1)  | O45  | 243. | RY*(1)  | C 6       | 9.23    | 2.51    | 0.136 |
| 149. | LP | (1)  | O45  | 250. | RY*(8)  | C 6       | 1.75    | 3.68    | 0.072 |
| 149. | LP | (1)  | O45  | 906. | BD*(1)  | C 6-Ru53  | 3.18    | 0.79    | 0.049 |
| 150. | LP | (1)  | O46  | 273. | RY*(1)  | C 8       | 9.31    | 2.41    | 0.134 |
| 150. | LP | (1)  | O46  | 280. | RY*(8)  | C 8       | 1.17    | 3.07    | 0.054 |
| 150. | LP | (1)  | O46  | 283. | RY*(11) | C 8       | 0.90    | 3.02    | 0.047 |
| 150. | LP | (1)  | O46  | 907. | BD*(1)  | C 8-Ru53  | 3.28    | 0.79    | 0.049 |
| 160. | LP | (1)  | N51  | 333. | RY*(1)  | C12       | 2.26    | 1.91    | 0.064 |
| 160. | LP | (1)  | N51  | 335. | RY*(3)  | C12       | 0.58    | 2.17    | 0.034 |
| 160. | LP | (1)  | N51  | 453. | RY*(1)  | C20       | 2.10    | 1.92    | 0.062 |
| 160. | LP | (1)  | N51  | 455. | RY*(3)  | C20       | 0.98    | 2.29    | 0.046 |
| 160. | LP | (1)  | N51  | 906. | BD*(1)  | C 6-Ru53  | 71.52   | 0.49    | 0.167 |
| 160. | LP | (1)  | N51  | 909. | BD*(2)  | C 8- O46  | 0.81    | 0.36    | 0.016 |
| 160. | LP | (1)  | N51  | 910. | BD*(3)  | C 8- O46  | 0.83    | 0.98    | 0.028 |
| 160. | LP | (1)  | N51  | 911. | BD*(1)  | C12- C14  | 7.07    | 0.83    | 0.074 |
| 160. | LP | (1)  | N51  | 914. | BD*(1)  | C12- H29  | 2.60    | 0.74    | 0.043 |
| 160. | LP | (1)  | N51  | 923. | BD*(1)  | C20- C23  | 7.49    | 0.83    | 0.076 |
| 160. | LP | (1)  | N51  | 924. | BD*(1)  | C20- C22  | 1.67    | 0.79    | 0.035 |
| 160. | LP | (1)  | N51  | 925. | BD*(1)  | C22- C25  | 0.56    | 0.85    | 0.021 |
| 160. | LP | (1)  | N51  | 926. | BD*(1)  | C16- Ru53 | 1.74    | 0.38    | 0.023 |
| 160. | LP | (1)  | N51  | 928. | BD*(1)  | C16- C18  | 1.45    | 0.88    | 0.035 |
| 164. | LP | (1)  | Ru53 | 167. | LP*(1)  | C16       | 3.41    | 0.11    | 0.021 |
| 164. | LP | (1)  | Ru53 | 246. | RY*(4)  | C 6       | 1.65    | 1.72    | 0.050 |
| 164. | LP | (1)  | Ru53 | 395. | RY*(3)  | C16       | 0.61    | 1.21    | 0.026 |
| 164. | LP | (1)  | Ru53 | 754. | RY*(3)  | N51       | 1.81    | 2.35    | 0.062 |
| 164. | LP | (1)  | Ru53 | 903. | BD*(1)  | C 6- O45  | 17.41   | 0.21    | 0.054 |
| 164. | LP | (1)  | Ru53 | 904. | BD*(2)  | C 6- O45  | 4.15    | 0.20    | 0.026 |
| 164. | LP | (1)  | Ru53 | 908. | BD*(1)  | C 8- O46  | 3.66    | 0.19    | 0.024 |
| 164. | LP | (1)  | Ru53 | 909. | BD*(2)  | C 8- O46  | 0.55    | 0.19    | 0.009 |
| 164. | LP | (1)  | Ru53 | 913. | BD*(1)  | C12- N51  | 0.57    | 0.64    | 0.018 |
| 164. | LP | (1)  | Ru53 | 921. | BD*(1)  | C20- N51  | 0.57    | 0.62    | 0.018 |



|      |    |      |      |      |     |      |          |       |      |       |
|------|----|------|------|------|-----|------|----------|-------|------|-------|
| 164. | LP | ( 1) | Ru53 | 928. | BD* | ( 1) | C16- C18 | 0.80  | 0.71 | 0.022 |
| 165. | LP | ( 2) | Ru53 | 167. | LP* | ( 1) | C16      | 14.68 | 0.11 | 0.043 |
| 165. | LP | ( 2) | Ru53 | 246. | RY* | ( 4) | C 6      | 0.50  | 1.72 | 0.028 |
| 165. | LP | ( 2) | Ru53 | 275. | RY* | ( 3) | C 8      | 2.10  | 1.98 | 0.062 |
| 165. | LP | ( 2) | Ru53 | 394. | RY* | ( 2) | C16      | 1.61  | 0.86 | 0.036 |
| 165. | LP | ( 2) | Ru53 | 832. | RY* | (18) | Ru53     | 0.51  | 5.42 | 0.051 |
| 165. | LP | ( 2) | Ru53 | 903. | BD* | ( 1) | C 6- O45 | 3.01  | 0.21 | 0.023 |
| 165. | LP | ( 2) | Ru53 | 904. | BD* | ( 2) | C 6- O45 | 1.37  | 0.20 | 0.015 |
| 165. | LP | ( 2) | Ru53 | 908. | BD* | ( 1) | C 8- O46 | 18.88 | 0.19 | 0.055 |
| 165. | LP | ( 2) | Ru53 | 909. | BD* | ( 2) | C 8- O46 | 5.06  | 0.19 | 0.028 |
| 165. | LP | ( 2) | Ru53 | 926. | BD* | ( 1) | C16-Ru53 | 0.98  | 0.21 | 0.013 |
| 166. | LP | ( 3) | Ru53 | 244. | RY* | ( 2) | C 6      | 2.70  | 1.23 | 0.056 |
| 166. | LP | ( 3) | Ru53 | 245. | RY* | ( 3) | C 6      | 0.61  | 2.81 | 0.041 |
| 166. | LP | ( 3) | Ru53 | 274. | RY* | ( 2) | C 8      | 2.33  | 1.32 | 0.054 |
| 166. | LP | ( 3) | Ru53 | 753. | RY* | ( 2) | N51      | 1.92  | 1.07 | 0.044 |
| 166. | LP | ( 3) | Ru53 | 903. | BD* | ( 1) | C 6- O45 | 4.17  | 0.22 | 0.028 |
| 166. | LP | ( 3) | Ru53 | 904. | BD* | ( 2) | C 6- O45 | 17.61 | 0.21 | 0.056 |
| 166. | LP | ( 3) | Ru53 | 908. | BD* | ( 1) | C 8- O46 | 4.95  | 0.20 | 0.029 |
| 166. | LP | ( 3) | Ru53 | 909. | BD* | ( 2) | C 8- O46 | 18.64 | 0.20 | 0.056 |
| 166. | LP | ( 3) | Ru53 | 922. | BD* | ( 2) | C20- N51 | 3.77  | 0.16 | 0.023 |

from unit 2 to unit 3

|      |    |      |          |      |     |      |          |      |       |       |
|------|----|------|----------|------|-----|------|----------|------|-------|-------|
| 18.  | BD | ( 3) | C 6- O45 | 638. | RY* | ( 1) | H43      | 0.08 | 2.30  | 0.012 |
| 18.  | BD | ( 3) | C 6- O45 | 639. | RY* | ( 2) | H43      | 0.13 | 2.89  | 0.017 |
| 18.  | BD | ( 3) | C 6- O45 | 641. | RY* | ( 4) | H43      | 0.09 | 3.19  | 0.015 |
| 18.  | BD | ( 3) | C 6- O45 | 688. | RY* | ( 1) | O47      | 0.13 | 2.75  | 0.017 |
| 18.  | BD | ( 3) | C 6- O45 | 689. | RY* | ( 2) | O47      | 0.29 | 3.41  | 0.028 |
| 18.  | BD | ( 3) | C 6- O45 | 692. | RY* | ( 5) | O47      | 0.08 | 3.48  | 0.015 |
| 18.  | BD | ( 3) | C 6- O45 | 694. | RY* | ( 7) | O47      | 0.06 | 3.60  | 0.013 |
| 18.  | BD | ( 3) | C 6- O45 | 695. | RY* | ( 8) | O47      | 0.09 | 3.57  | 0.016 |
| 19.  | BD | ( 1) | C 6-Ru53 | 638. | RY* | ( 1) | H43      | 0.23 | 1.77  | 0.018 |
| 19.  | BD | ( 1) | C 6-Ru53 | 640. | RY* | ( 3) | H43      | 0.14 | 2.50  | 0.017 |
| 19.  | BD | ( 1) | C 6-Ru53 | 641. | RY* | ( 4) | H43      | 0.05 | 2.67  | 0.011 |
| 19.  | BD | ( 1) | C 6-Ru53 | 689. | RY* | ( 2) | O47      | 0.77 | 2.88  | 0.043 |
| 19.  | BD | ( 1) | C 6-Ru53 | 690. | RY* | ( 3) | O47      | 2.14 | 3.08  | 0.074 |
| 19.  | BD | ( 1) | C 6-Ru53 | 691. | RY* | ( 4) | O47      | 0.31 | 4.25  | 0.033 |
| 19.  | BD | ( 1) | C 6-Ru53 | 692. | RY* | ( 5) | O47      | 0.43 | 2.96  | 0.032 |
| 19.  | BD | ( 1) | C 6-Ru53 | 695. | RY* | ( 8) | O47      | 0.24 | 3.04  | 0.025 |
| 19.  | BD | ( 1) | C 6-Ru53 | 696. | RY* | ( 9) | O47      | 0.16 | 3.19  | 0.020 |
| 19.  | BD | ( 1) | C 6-Ru53 | 697. | RY* | (10) | O47      | 0.11 | 5.34  | 0.022 |
| 19.  | BD | ( 1) | C 6-Ru53 | 700. | RY* | (13) | O47      | 0.10 | 4.69  | 0.019 |
| 19.  | BD | ( 1) | C 6-Ru53 | 702. | RY* | (15) | O47      | 0.12 | 78.69 | 0.087 |
| 19.  | BD | ( 1) | C 6-Ru53 | 934. | BD* | ( 1) | H43- O47 | 0.12 | 0.98  | 0.010 |
| 23.  | BD | ( 1) | C 8- O46 | 641. | RY* | ( 4) | H43      | 0.05 | 2.52  | 0.010 |
| 25.  | BD | ( 3) | C 8- O46 | 638. | RY* | ( 1) | H43      | 0.07 | 2.33  | 0.012 |
| 25.  | BD | ( 3) | C 8- O46 | 688. | RY* | ( 1) | O47      | 0.05 | 2.79  | 0.011 |
| 25.  | BD | ( 3) | C 8- O46 | 689. | RY* | ( 2) | O47      | 0.06 | 3.44  | 0.013 |
| 25.  | BD | ( 3) | C 8- O46 | 692. | RY* | ( 5) | O47      | 0.16 | 3.52  | 0.021 |
| 25.  | BD | ( 3) | C 8- O46 | 702. | RY* | (15) | O47      | 0.07 | 79.25 | 0.065 |
| 26.  | BD | ( 1) | C 8-Ru53 | 639. | RY* | ( 2) | H43      | 0.21 | 2.36  | 0.020 |
| 26.  | BD | ( 1) | C 8-Ru53 | 641. | RY* | ( 4) | H43      | 0.16 | 2.66  | 0.019 |
| 26.  | BD | ( 1) | C 8-Ru53 | 689. | RY* | ( 2) | O47      | 0.50 | 2.88  | 0.034 |
| 26.  | BD | ( 1) | C 8-Ru53 | 690. | RY* | ( 3) | O47      | 0.97 | 3.08  | 0.050 |
| 26.  | BD | ( 1) | C 8-Ru53 | 691. | RY* | ( 4) | O47      | 0.83 | 4.25  | 0.054 |
| 26.  | BD | ( 1) | C 8-Ru53 | 694. | RY* | ( 7) | O47      | 0.10 | 3.07  | 0.016 |
| 26.  | BD | ( 1) | C 8-Ru53 | 695. | RY* | ( 8) | O47      | 0.16 | 3.04  | 0.020 |
| 26.  | BD | ( 1) | C 8-Ru53 | 701. | RY* | (14) | O47      | 0.22 | 92.83 | 0.130 |
| 26.  | BD | ( 1) | C 8-Ru53 | 702. | RY* | (15) | O47      | 0.32 | 78.69 | 0.145 |
| 47.  | BD | ( 1) | C16- C18 | 638. | RY* | ( 1) | H43      | 0.11 | 1.86  | 0.013 |
| 47.  | BD | ( 1) | C16- C18 | 639. | RY* | ( 2) | H43      | 0.06 | 2.46  | 0.011 |
| 47.  | BD | ( 1) | C16- C18 | 640. | RY* | ( 3) | H43      | 0.06 | 2.59  | 0.012 |
| 47.  | BD | ( 1) | C16- C18 | 688. | RY* | ( 1) | O47      | 0.06 | 2.32  | 0.011 |
| 47.  | BD | ( 1) | C16- C18 | 689. | RY* | ( 2) | O47      | 0.10 | 2.97  | 0.016 |
| 47.  | BD | ( 1) | C16- C18 | 690. | RY* | ( 3) | O47      | 0.08 | 3.17  | 0.014 |
| 47.  | BD | ( 1) | C16- C18 | 934. | BD* | ( 1) | H43- O47 | 0.05 | 1.07  | 0.007 |
| 48.  | BD | ( 1) | C16- C22 | 641. | RY* | ( 4) | H43      | 0.05 | 2.75  | 0.011 |
| 48.  | BD | ( 1) | C16- C22 | 934. | BD* | ( 1) | H43- O47 | 0.16 | 1.06  | 0.012 |
| 49.  | BD | ( 1) | C16-Ru53 | 638. | RY* | ( 1) | H43      | 0.15 | 1.61  | 0.014 |
| 49.  | BD | ( 1) | C16-Ru53 | 689. | RY* | ( 2) | O47      | 0.57 | 2.72  | 0.036 |
| 49.  | BD | ( 1) | C16-Ru53 | 690. | RY* | ( 3) | O47      | 1.35 | 2.92  | 0.058 |
| 49.  | BD | ( 1) | C16-Ru53 | 691. | RY* | ( 4) | O47      | 0.29 | 4.09  | 0.032 |
| 49.  | BD | ( 1) | C16-Ru53 | 695. | RY* | ( 8) | O47      | 0.25 | 2.88  | 0.025 |
| 49.  | BD | ( 1) | C16-Ru53 | 696. | RY* | ( 9) | O47      | 0.09 | 3.03  | 0.016 |
| 49.  | BD | ( 1) | C16-Ru53 | 697. | RY* | (10) | O47      | 0.12 | 5.18  | 0.023 |
| 49.  | BD | ( 1) | C16-Ru53 | 700. | RY* | (13) | O47      | 0.26 | 4.53  | 0.032 |
| 49.  | BD | ( 1) | C16-Ru53 | 702. | RY* | (15) | O47      | 0.11 | 78.53 | 0.086 |
| 55.  | BD | ( 1) | C18- H32 | 689. | RY* | ( 2) | O47      | 0.06 | 2.80  | 0.011 |
| 57.  | BD | ( 1) | C20- C22 | 934. | BD* | ( 1) | H43- O47 | 0.11 | 1.05  | 0.010 |
| 59.  | BD | ( 1) | C20- N51 | 640. | RY* | ( 3) | H43      | 0.05 | 2.73  | 0.011 |
| 59.  | BD | ( 1) | C20- N51 | 641. | RY* | ( 4) | H43      | 0.10 | 2.90  | 0.015 |
| 59.  | BD | ( 1) | C20- N51 | 934. | BD* | ( 1) | H43- O47 | 0.11 | 1.21  | 0.010 |
| 135. | CR | ( 7) | Ru53     | 934. | BD* | ( 1) | H43- O47 | 0.06 | 2.29  | 0.010 |
| 138. | CR | (10) | Ru53     | 934. | BD* | ( 1) | H43- O47 | 0.07 | 2.29  | 0.012 |
| 160. | LP | ( 1) | N51      | 934. | BD* | ( 1) | H43- O47 | 0.10 | 0.82  | 0.009 |
| 164. | LP | ( 1) | Ru53     | 638. | RY* | ( 1) | H43      | 0.07 | 1.45  | 0.009 |
| 164. | LP | ( 1) | Ru53     | 639. | RY* | ( 2) | H43      | 0.10 | 2.04  | 0.014 |
| 164. | LP | ( 1) | Ru53     | 641. | RY* | ( 4) | H43      | 0.07 | 2.34  | 0.012 |
| 164. | LP | ( 1) | Ru53     | 689. | RY* | ( 2) | O47      | 0.10 | 2.56  | 0.015 |
| 164. | LP | ( 1) | Ru53     | 690. | RY* | ( 3) | O47      | 0.06 | 2.75  | 0.013 |
| 164. | LP | ( 1) | Ru53     | 934. | BD* | ( 1) | H43- O47 | 0.07 | 0.65  | 0.007 |
| 165. | LP | ( 2) | Ru53     | 639. | RY* | ( 2) | H43      | 0.07 | 2.04  | 0.012 |
| 165. | LP | ( 2) | Ru53     | 641. | RY* | ( 4) | H43      | 0.25 | 2.34  | 0.023 |
| 165. | LP | ( 2) | Ru53     | 689. | RY* | ( 2) | O47      | 0.79 | 2.56  | 0.043 |
| 165. | LP | ( 2) | Ru53     | 690. | RY* | ( 3) | O47      | 0.09 | 2.76  | 0.016 |
| 165. | LP | ( 2) | Ru53     | 691. | RY* | ( 4) | O47      | 0.11 | 3.93  | 0.016 |
| 165. | LP | ( 2) | Ru53     | 694. | RY* | ( 7) | O47      | 0.11 | 2.75  | 0.017 |
| 165. | LP | ( 2) | Ru53     | 696. | RY* | ( 9) | O47      | 0.12 | 2.87  | 0.018 |
| 165. | LP | ( 2) | Ru53     | 698. | RY* | (11) | O47      | 0.07 | 4.79  | 0.018 |
| 165. | LP | ( 2) | Ru53     | 934. | BD* | ( 1) | H43- O47 | 0.26 | 0.65  | 0.013 |
| 166. | LP | ( 3) | Ru53     | 638. | RY* | ( 1) | H43      | 0.07 | 1.45  | 0.010 |
| 166. | LP | ( 3) | Ru53     | 688. | RY* | ( 1) | O47      | 1.48 | 1.91  | 0.052 |
| 166. | LP | ( 3) | Ru53     | 690. | RY* | ( 3) | O47      | 0.12 | 2.76  | 0.018 |
| 166. | LP | ( 3) | Ru53     | 691. | RY* | ( 4) | O47      | 0.09 | 3.93  | 0.018 |
| 166. | LP | ( 3) | Ru53     | 695. | RY* | ( 8) | O47      | 0.07 | 2.72  | 0.013 |
| 166. | LP | ( 3) | Ru53     | 699. | RY* | (12) | O47      | 0.12 | 4.74  | 0.023 |
| 166. | LP | ( 3) | Ru53     | 934. | BD* | ( 1) | H43- O47 | 0.19 | 0.66  | 0.011 |

from unit 2 to unit 4

|     |    |      |          |      |     |      |      |      |      |       |
|-----|----|------|----------|------|-----|------|------|------|------|-------|
| 16. | BD | ( 1) | C 6- O45 | 722. | RY* | ( 5) | C149 | 0.06 | 2.71 | 0.011 |
| 17. | BD | ( 2) | C 6- O45 | 721. | RY* | ( 4) | C149 | 0.12 | 2.98 | 0.017 |
| 17. | BD | ( 2) | C 6- O45 | 722. | RY* | ( 5) | C149 | 0.07 | 2.70 | 0.013 |
| 18. | BD | ( 3) | C 6- O45 | 719. | RY* | ( 2) | C149 | 0.55 | 2.83 | 0.035 |
| 18. | BD | ( 3) | C 6- O45 | 720. | RY* | ( 3) | C149 | 1.31 | 2.94 | 0.055 |
| 18. | BD | ( 3) | C 6- O45 | 721. | RY* | ( 4) | C149 | 1.12 | 3.64 | 0.057 |
| 18. | BD | ( 3) | C 6- O45 | 722. | RY* | ( 5) | C149 | 0.85 | 3.35 | 0.048 |
| 18. | BD | ( 3) | C 6- O45 | 723. | RY* | ( 6) | C149 | 0.15 | 4.09 | 0.022 |

|                       |    |     |      |      |      |         |      |      |       |       |
|-----------------------|----|-----|------|------|------|---------|------|------|-------|-------|
| 18.                   | BD | (3) | C 6- | O45  | 724. | RY*(7)  | C149 | 0.23 | 2.82  | 0.023 |
| 18.                   | BD | (3) | C 6- | O45  | 725. | RY*(8)  | C149 | 0.19 | 6.30  | 0.031 |
| 18.                   | BD | (3) | C 6- | O45  | 726. | RY*(9)  | C149 | 0.16 | 2.49  | 0.018 |
| 18.                   | BD | (3) | C 6- | O45  | 727. | RY*(10) | C149 | 0.07 | 4.56  | 0.016 |
| 18.                   | BD | (3) | C 6- | O45  | 730. | RY*(13) | C149 | 0.11 | 5.61  | 0.022 |
| 19.                   | BD | (1) | C 6- | Ru53 | 719. | RY*(2)  | C149 | 0.32 | 2.31  | 0.025 |
| 19.                   | BD | (1) | C 6- | Ru53 | 720. | RY*(3)  | C149 | 0.51 | 2.41  | 0.032 |
| 19.                   | BD | (1) | C 6- | Ru53 | 721. | RY*(4)  | C149 | 0.26 | 3.11  | 0.026 |
| 19.                   | BD | (1) | C 6- | Ru53 | 723. | RY*(6)  | C149 | 0.62 | 3.56  | 0.043 |
| 19.                   | BD | (1) | C 6- | Ru53 | 724. | RY*(7)  | C149 | 0.94 | 2.29  | 0.042 |
| 19.                   | BD | (1) | C 6- | Ru53 | 725. | RY*(8)  | C149 | 0.16 | 5.77  | 0.028 |
| 25.                   | BD | (3) | C 8- | O46  | 719. | RY*(2)  | C149 | 0.47 | 2.87  | 0.033 |
| 25.                   | BD | (3) | C 8- | O46  | 720. | RY*(3)  | C149 | 1.63 | 2.97  | 0.062 |
| 25.                   | BD | (3) | C 8- | O46  | 721. | RY*(4)  | C149 | 0.61 | 3.67  | 0.042 |
| 25.                   | BD | (3) | C 8- | O46  | 722. | RY*(5)  | C149 | 0.70 | 3.39  | 0.043 |
| 25.                   | BD | (3) | C 8- | O46  | 723. | RY*(6)  | C149 | 0.19 | 4.12  | 0.025 |
| 25.                   | BD | (3) | C 8- | O46  | 724. | RY*(7)  | C149 | 0.32 | 2.85  | 0.027 |
| 25.                   | BD | (3) | C 8- | O46  | 725. | RY*(8)  | C149 | 0.19 | 6.33  | 0.031 |
| 25.                   | BD | (3) | C 8- | O46  | 727. | RY*(10) | C149 | 0.15 | 4.60  | 0.024 |
| 25.                   | BD | (3) | C 8- | O46  | 730. | RY*(13) | C149 | 0.12 | 5.64  | 0.023 |
| 26.                   | BD | (1) | C 8- | Ru53 | 719. | RY*(2)  | C149 | 0.68 | 2.30  | 0.036 |
| 26.                   | BD | (1) | C 8- | Ru53 | 720. | RY*(3)  | C149 | 0.18 | 2.41  | 0.019 |
| 26.                   | BD | (1) | C 8- | Ru53 | 721. | RY*(4)  | C149 | 0.62 | 3.11  | 0.040 |
| 26.                   | BD | (1) | C 8- | Ru53 | 722. | RY*(5)  | C149 | 0.48 | 2.82  | 0.034 |
| 26.                   | BD | (1) | C 8- | Ru53 | 723. | RY*(6)  | C149 | 0.36 | 3.56  | 0.032 |
| 26.                   | BD | (1) | C 8- | Ru53 | 724. | RY*(7)  | C149 | 0.34 | 2.29  | 0.025 |
| 26.                   | BD | (1) | C 8- | Ru53 | 725. | RY*(8)  | C149 | 0.36 | 5.77  | 0.042 |
| 26.                   | BD | (1) | C 8- | Ru53 | 732. | RY*(15) | C149 | 0.05 | 26.54 | 0.034 |
| 37.                   | BD | (1) | C12- | C14  | 719. | RY*(2)  | C149 | 0.07 | 2.44  | 0.012 |
| 37.                   | BD | (1) | C12- | C14  | 720. | RY*(3)  | C149 | 0.06 | 2.55  | 0.011 |
| 37.                   | BD | (1) | C12- | C14  | 721. | RY*(4)  | C149 | 0.07 | 3.25  | 0.014 |
| 37.                   | BD | (1) | C12- | C14  | 722. | RY*(5)  | C149 | 0.12 | 2.96  | 0.017 |
| 39.                   | BD | (1) | C12- | H29  | 721. | RY*(4)  | C149 | 0.06 | 3.07  | 0.012 |
| 39.                   | BD | (1) | C12- | H29  | 722. | RY*(5)  | C149 | 0.24 | 2.78  | 0.023 |
| 40.                   | BD | (1) | C12- | N51  | 719. | RY*(2)  | C149 | 0.10 | 2.56  | 0.014 |
| 40.                   | BD | (1) | C12- | N51  | 720. | RY*(3)  | C149 | 0.14 | 2.66  | 0.017 |
| 40.                   | BD | (1) | C12- | N51  | 721. | RY*(4)  | C149 | 0.09 | 3.36  | 0.016 |
| 40.                   | BD | (1) | C12- | N51  | 722. | RY*(5)  | C149 | 0.45 | 3.08  | 0.033 |
| 40.                   | BD | (1) | C12- | N51  | 727. | RY*(10) | C149 | 0.08 | 4.29  | 0.017 |
| 47.                   | BD | (1) | C16- | C18  | 719. | RY*(2)  | C149 | 0.15 | 2.40  | 0.017 |
| 47.                   | BD | (1) | C16- | C18  | 720. | RY*(3)  | C149 | 0.16 | 2.50  | 0.018 |
| 47.                   | BD | (1) | C16- | C18  | 721. | RY*(4)  | C149 | 0.27 | 3.21  | 0.027 |
| 47.                   | BD | (1) | C16- | C18  | 722. | RY*(5)  | C149 | 0.32 | 2.92  | 0.027 |
| 47.                   | BD | (1) | C16- | C18  | 725. | RY*(8)  | C149 | 0.09 | 5.86  | 0.020 |
| 48.                   | BD | (1) | C16- | C22  | 720. | RY*(3)  | C149 | 0.16 | 2.49  | 0.018 |
| 49.                   | BD | (1) | C16- | Ru53 | 720. | RY*(3)  | C149 | 0.08 | 2.25  | 0.012 |
| 59.                   | BD | (1) | C20- | N51  | 719. | RY*(2)  | C149 | 0.13 | 2.54  | 0.017 |
| 59.                   | BD | (1) | C20- | N51  | 720. | RY*(3)  | C149 | 0.07 | 2.64  | 0.013 |
| 59.                   | BD | (1) | C20- | N51  | 721. | RY*(4)  | C149 | 0.09 | 3.35  | 0.015 |
| 60.                   | BD | (2) | C20- | N51  | 720. | RY*(3)  | C149 | 0.06 | 2.18  | 0.011 |
| 60.                   | BD | (2) | C20- | N51  | 722. | RY*(5)  | C149 | 0.09 | 2.60  | 0.014 |
| 131.                  | CR | (3) | Ru53 |      | 719. | RY*(2)  | C149 | 0.07 | 23.65 | 0.036 |
| 131.                  | CR | (3) | Ru53 |      | 720. | RY*(3)  | C149 | 0.15 | 23.75 | 0.054 |
| 131.                  | CR | (3) | Ru53 |      | 721. | RY*(4)  | C149 | 0.12 | 24.45 | 0.048 |
| 131.                  | CR | (3) | Ru53 |      | 722. | RY*(5)  | C149 | 0.13 | 24.17 | 0.050 |
| 132.                  | CR | (4) | Ru53 |      | 719. | RY*(2)  | C149 | 0.05 | 6.39  | 0.016 |
| 132.                  | CR | (4) | Ru53 |      | 720. | RY*(3)  | C149 | 0.09 | 6.49  | 0.021 |
| 132.                  | CR | (4) | Ru53 |      | 721. | RY*(4)  | C149 | 0.14 | 7.20  | 0.028 |
| 132.                  | CR | (4) | Ru53 |      | 722. | RY*(5)  | C149 | 0.14 | 6.91  | 0.028 |
| 132.                  | CR | (4) | Ru53 |      | 723. | RY*(6)  | C149 | 0.06 | 7.65  | 0.019 |
| 132.                  | CR | (4) | Ru53 |      | 725. | RY*(8)  | C149 | 0.06 | 9.85  | 0.022 |
| 164.                  | LP | (1) | Ru53 |      | 718. | RY*(1)  | C149 | 0.53 | 0.83  | 0.020 |
| 164.                  | LP | (1) | Ru53 |      | 720. | RY*(3)  | C149 | 0.07 | 2.09  | 0.012 |
| 164.                  | LP | (1) | Ru53 |      | 721. | RY*(4)  | C149 | 0.08 | 2.79  | 0.014 |
| 164.                  | LP | (1) | Ru53 |      | 722. | RY*(5)  | C149 | 0.05 | 2.50  | 0.011 |
| 165.                  | LP | (2) | Ru53 |      | 721. | RY*(4)  | C149 | 0.14 | 2.79  | 0.019 |
| 165.                  | LP | (2) | Ru53 |      | 722. | RY*(5)  | C149 | 0.24 | 2.50  | 0.023 |
| 165.                  | LP | (2) | Ru53 |      | 727. | RY*(10) | C149 | 0.12 | 3.71  | 0.020 |
| 165.                  | LP | (2) | Ru53 |      | 735. | RY*(18) | C149 | 0.06 | 40.80 | 0.048 |
| 165.                  | LP | (2) | Ru53 |      | 736. | RY*(19) | C149 | 0.07 | 4.97  | 0.018 |
| 166.                  | LP | (3) | Ru53 |      | 727. | RY*(10) | C149 | 0.08 | 3.72  | 0.017 |
| from unit 3 to unit 1 |    |     |      |      |      |         |      |      |       |       |
| 72.                   | BD | (1) | H43- | O47  | 193. | RY*(11) | C 2  | 0.06 | 5.74  | 0.016 |
| 72.                   | BD | (1) | H43- | O47  | 213. | RY*(1)  | C 4  | 0.19 | 2.44  | 0.019 |
| 72.                   | BD | (1) | H43- | O47  | 219. | RY*(7)  | C 4  | 0.24 | 7.28  | 0.037 |
| 72.                   | BD | (1) | H43- | O47  | 261. | RY*(4)  | C 7  | 0.07 | 2.11  | 0.011 |
| 72.                   | BD | (1) | H43- | O47  | 263. | RY*(6)  | C 7  | 0.13 | 4.85  | 0.022 |
| 72.                   | BD | (1) | H43- | O47  | 268. | RY*(11) | C 7  | 0.06 | 5.93  | 0.017 |
| 72.                   | BD | (1) | H43- | O47  | 271. | RY*(14) | C 7  | 0.06 | 42.63 | 0.045 |
| 72.                   | BD | (1) | H43- | O47  | 272. | RY*(15) | C 7  | 0.10 | 24.32 | 0.044 |
| 72.                   | BD | (1) | H43- | O47  | 288. | RY*(1)  | C 9  | 0.12 | 2.01  | 0.014 |
| 72.                   | BD | (1) | H43- | O47  | 291. | RY*(4)  | C 9  | 0.09 | 1.79  | 0.012 |
| 72.                   | BD | (1) | H43- | O47  | 303. | RY*(1)  | C10  | 0.26 | 2.56  | 0.023 |
| 72.                   | BD | (1) | H43- | O47  | 304. | RY*(2)  | C10  | 0.10 | 1.60  | 0.011 |
| 72.                   | BD | (1) | H43- | O47  | 305. | RY*(3)  | C10  | 0.12 | 3.30  | 0.018 |
| 72.                   | BD | (1) | H43- | O47  | 309. | RY*(7)  | C10  | 0.13 | 7.07  | 0.027 |
| 72.                   | BD | (1) | H43- | O47  | 310. | RY*(8)  | C10  | 0.07 | 3.94  | 0.015 |
| 72.                   | BD | (1) | H43- | O47  | 318. | RY*(1)  | C11  | 0.28 | 1.69  | 0.020 |
| 72.                   | BD | (1) | H43- | O47  | 320. | RY*(3)  | C11  | 0.15 | 1.66  | 0.014 |
| 72.                   | BD | (1) | H43- | O47  | 321. | RY*(4)  | C11  | 0.21 | 2.90  | 0.022 |
| 72.                   | BD | (1) | H43- | O47  | 378. | RY*(1)  | C15  | 0.06 | 2.26  | 0.010 |
| 72.                   | BD | (1) | H43- | O47  | 379. | RY*(2)  | C15  | 0.06 | 1.11  | 0.007 |
| 72.                   | BD | (1) | H43- | O47  | 383. | RY*(6)  | C15  | 0.21 | 3.88  | 0.025 |
| 72.                   | BD | (1) | H43- | O47  | 384. | RY*(7)  | C15  | 0.08 | 8.61  | 0.024 |
| 72.                   | BD | (1) | H43- | O47  | 588. | RY*(1)  | H33  | 0.11 | 1.97  | 0.013 |
| 72.                   | BD | (1) | H43- | O47  | 646. | RY*(4)  | O44  | 0.07 | 1.38  | 0.009 |
| 72.                   | BD | (1) | H43- | O47  | 648. | RY*(6)  | O44  | 0.06 | 3.13  | 0.013 |
| 72.                   | BD | (1) | H43- | O47  | 705. | RY*(3)  | O48  | 0.09 | 2.63  | 0.014 |
| 72.                   | BD | (1) | H43- | O47  | 738. | RY*(2)  | N50  | 0.41 | 1.51  | 0.022 |
| 72.                   | BD | (1) | H43- | O47  | 739. | RY*(3)  | N50  | 0.17 | 2.75  | 0.020 |
| 72.                   | BD | (1) | H43- | O47  | 740. | RY*(4)  | N50  | 0.32 | 5.71  | 0.038 |
| 72.                   | BD | (1) | H43- | O47  | 743. | RY*(7)  | N50  | 0.05 | 3.02  | 0.011 |
| 72.                   | BD | (1) | H43- | O47  | 744. | RY*(8)  | N50  | 0.32 | 14.31 | 0.061 |
| 72.                   | BD | (1) | H43- | O47  | 749. | RY*(13) | N50  | 0.13 | 6.72  | 0.026 |
| 72.                   | BD | (1) | H43- | O47  | 750. | RY*(14) | N50  | 0.23 | 48.38 | 0.072 |
| 72.                   | BD | (1) | H43- | O47  | 751. | RY*(15) | N50  | 0.23 | 26.67 | 0.070 |
| 72.                   | BD | (1) | H43- | O47  | 767. | RY*(1)  | Ru52 | 0.69 | 7.43  | 0.064 |
| 72.                   | BD | (1) | H43- | O47  | 768. | RY*(2)  | Ru52 | 0.14 | 4.16  | 0.022 |
| 72.                   | BD | (1) | H43- | O47  | 769. | RY*(3)  | Ru52 | 0.99 | 2.23  | 0.042 |
| 72.                   | BD | (1) | H43- | O47  | 770. | RY*(4)  | Ru52 | 0.99 | 2.93  | 0.048 |
| 72.                   | BD | (1) | H43- | O47  | 771. | RY*(5)  | Ru52 | 0.28 | 7.51  | 0.041 |
| 72.                   | BD | (1) | H43- | O47  | 772. | RY*(6)  | Ru52 | 0.65 | 5.02  | 0.051 |
| 72.                   | BD | (1) | H43- | O47  | 773. | RY*(7)  | Ru52 | 0.62 | 8.86  | 0.066 |
| 72.                   | BD | (1) | H43- | O47  | 774. | RY*(8)  | Ru52 | 0.11 | 4.26  | 0.019 |
| 72.                   | BD | (1) | H43- | O47  | 775. | RY*(9)  | Ru52 | 0.67 | 10.64 | 0.076 |

|      |    |     |         |      |                |              |         |       |
|------|----|-----|---------|------|----------------|--------------|---------|-------|
| 72.  | BD | (1) | H43-047 | 776. | RY*(10)Ru52    | 0.19         | 8.98    | 0.037 |
| 72.  | BD | (1) | H43-047 | 778. | RY*(12)Ru52    | 0.35         | 6.53    | 0.043 |
| 72.  | BD | (1) | H43-047 | 779. | RY*(13)Ru52    | 0.31         | 15.36   | 0.061 |
| 72.  | BD | (1) | H43-047 | 780. | RY*(14)Ru52    | 0.30         | 9.42    | 0.048 |
| 72.  | BD | (1) | H43-047 | 781. | RY*(15)Ru52    | 0.16         | 8.17    | 0.033 |
| 72.  | BD | (1) | H43-047 | 783. | RY*(17)Ru52    | 0.47         | 13.10   | 0.070 |
| 72.  | BD | (1) | H43-047 | 785. | RY*(19)Ru52    | 0.67         | 7.74    | 0.065 |
| 72.  | BD | (1) | H43-047 | 787. | RY*(21)Ru52    | 0.21         | 13.11   | 0.047 |
| 72.  | BD | (1) | H43-047 | 789. | RY*(23)Ru52    | 0.80         | 11.06   | 0.084 |
| 72.  | BD | (1) | H43-047 | 790. | RY*(24)Ru52    | 0.4913605.56 |         | 2.313 |
| 72.  | BD | (1) | H43-047 | 791. | RY*(25)Ru52    | 0.2633395.00 |         | 2.660 |
| 72.  | BD | (1) | H43-047 | 792. | RY*(26)Ru52    | 0.58         | 1160.02 | 0.731 |
| 72.  | BD | (1) | H43-047 | 793. | RY*(27)Ru52    | 0.29         | 50.90   | 0.108 |
| 72.  | BD | (1) | H43-047 | 794. | RY*(28)Ru52    | 0.19         | 186.76  | 0.169 |
| 72.  | BD | (1) | H43-047 | 795. | RY*(29)Ru52    | 0.54         | 53.56   | 0.152 |
| 72.  | BD | (1) | H43-047 | 796. | RY*(30)Ru52    | 0.32         | 19.22   | 0.071 |
| 72.  | BD | (1) | H43-047 | 799. | RY*(33)Ru52    | 0.10         | 88.83   | 0.085 |
| 72.  | BD | (1) | H43-047 | 804. | RY*(38)Ru52    | 0.65         | 258.93  | 0.366 |
| 72.  | BD | (1) | H43-047 | 875. | BD*(1)C4-Ru52  | 6.36         | 0.73    | 0.066 |
| 72.  | BD | (1) | H43-047 | 879. | BD*(3)C10-048  | 0.07         | 1.20    | 0.008 |
| 72.  | BD | (1) | H43-047 | 896. | BD*(2)C11-C15  | 0.17         | 0.65    | 0.010 |
| 102. | CR | (1) | 047     | 875. | BD*(1)C4-Ru52  | 5.17         | 18.70   | 0.301 |
| 151. | LP | (1) | 047     | 188. | RY*(6)C2       | 0.17         | 3.42    | 0.022 |
| 151. | LP | (1) | 047     | 189. | RY*(7)C2       | 0.05         | 9.90    | 0.021 |
| 151. | LP | (1) | 047     | 213. | RY*(1)C4       | 0.06         | 2.19    | 0.010 |
| 151. | LP | (1) | 047     | 219. | RY*(7)C4       | 0.10         | 7.03    | 0.024 |
| 151. | LP | (1) | 047     | 260. | RY*(3)C7       | 0.06         | 2.31    | 0.010 |
| 151. | LP | (1) | 047     | 263. | RY*(6)C7       | 0.06         | 4.60    | 0.015 |
| 151. | LP | (1) | 047     | 290. | RY*(3)C9       | 0.06         | 2.17    | 0.010 |
| 151. | LP | (1) | 047     | 292. | RY*(5)C9       | 0.07         | 3.58    | 0.014 |
| 151. | LP | (1) | 047     | 293. | RY*(6)C9       | 0.06         | 3.13    | 0.013 |
| 151. | LP | (1) | 047     | 303. | RY*(1)C10      | 0.08         | 2.31    | 0.012 |
| 151. | LP | (1) | 047     | 309. | RY*(7)C10      | 0.11         | 6.82    | 0.024 |
| 151. | LP | (1) | 047     | 310. | RY*(8)C10      | 0.11         | 3.69    | 0.019 |
| 151. | LP | (1) | 047     | 311. | RY*(9)C10      | 0.08         | 4.94    | 0.018 |
| 151. | LP | (1) | 047     | 313. | RY*(11)C10     | 0.07         | 2.45    | 0.012 |
| 151. | LP | (1) | 047     | 318. | RY*(1)C11      | 0.08         | 1.44    | 0.009 |
| 151. | LP | (1) | 047     | 321. | RY*(4)C11      | 0.12         | 2.65    | 0.016 |
| 151. | LP | (1) | 047     | 326. | RY*(9)C11      | 0.06         | 13.18   | 0.024 |
| 151. | LP | (1) | 047     | 383. | RY*(6)C15      | 0.08         | 3.63    | 0.015 |
| 151. | LP | (1) | 047     | 646. | RY*(4)O44      | 0.09         | 1.13    | 0.009 |
| 151. | LP | (1) | 047     | 648. | RY*(6)O44      | 0.07         | 2.88    | 0.013 |
| 151. | LP | (1) | 047     | 706. | RY*(4)O48      | 0.06         | 1.03    | 0.007 |
| 151. | LP | (1) | 047     | 767. | RY*(1)Ru52     | 0.39         | 7.18    | 0.047 |
| 151. | LP | (1) | 047     | 768. | RY*(2)Ru52     | 0.17         | 3.91    | 0.023 |
| 151. | LP | (1) | 047     | 770. | RY*(4)Ru52     | 0.11         | 2.68    | 0.016 |
| 151. | LP | (1) | 047     | 773. | RY*(7)Ru52     | 0.98         | 8.61    | 0.083 |
| 151. | LP | (1) | 047     | 774. | RY*(8)Ru52     | 0.10         | 4.01    | 0.018 |
| 151. | LP | (1) | 047     | 775. | RY*(9)Ru52     | 0.93         | 10.39   | 0.088 |
| 151. | LP | (1) | 047     | 776. | RY*(10)Ru52    | 0.67         | 8.73    | 0.069 |
| 151. | LP | (1) | 047     | 778. | RY*(12)Ru52    | 0.30         | 6.28    | 0.039 |
| 151. | LP | (1) | 047     | 779. | RY*(13)Ru52    | 0.55         | 15.11   | 0.082 |
| 151. | LP | (1) | 047     | 780. | RY*(14)Ru52    | 1.49         | 9.16    | 0.105 |
| 151. | LP | (1) | 047     | 781. | RY*(15)Ru52    | 0.10         | 7.92    | 0.025 |
| 151. | LP | (1) | 047     | 782. | RY*(16)Ru52    | 0.07         | 6.77    | 0.019 |
| 151. | LP | (1) | 047     | 783. | RY*(17)Ru52    | 0.32         | 12.85   | 0.057 |
| 151. | LP | (1) | 047     | 784. | RY*(18)Ru52    | 0.08         | 6.33    | 0.020 |
| 151. | LP | (1) | 047     | 785. | RY*(19)Ru52    | 0.10         | 7.49    | 0.024 |
| 151. | LP | (1) | 047     | 786. | RY*(20)Ru52    | 0.23         | 10.62   | 0.044 |
| 151. | LP | (1) | 047     | 787. | RY*(21)Ru52    | 0.05         | 12.86   | 0.023 |
| 151. | LP | (1) | 047     | 789. | RY*(23)Ru52    | 0.46         | 10.81   | 0.064 |
| 151. | LP | (1) | 047     | 790. | RY*(24)Ru52    | 0.4913605.31 |         | 2.314 |
| 151. | LP | (1) | 047     | 791. | RY*(25)Ru52    | 0.2633394.75 |         | 2.656 |
| 151. | LP | (1) | 047     | 792. | RY*(26)Ru52    | 0.57         | 1159.77 | 0.731 |
| 151. | LP | (1) | 047     | 795. | RY*(29)Ru52    | 0.55         | 53.31   | 0.155 |
| 151. | LP | (1) | 047     | 796. | RY*(30)Ru52    | 0.39         | 18.97   | 0.078 |
| 151. | LP | (1) | 047     | 797. | RY*(31)Ru52    | 0.12         | 19.41   | 0.043 |
| 151. | LP | (1) | 047     | 798. | RY*(32)Ru52    | 0.08         | 54.23   | 0.057 |
| 151. | LP | (1) | 047     | 799. | RY*(33)Ru52    | 0.10         | 88.58   | 0.086 |
| 151. | LP | (1) | 047     | 800. | RY*(34)Ru52    | 0.12         | 49.94   | 0.071 |
| 151. | LP | (1) | 047     | 801. | RY*(35)Ru52    | 0.07         | 19.11   | 0.034 |
| 151. | LP | (1) | 047     | 803. | RY*(37)Ru52    | 0.08         | 186.46  | 0.110 |
| 151. | LP | (1) | 047     | 804. | RY*(38)Ru52    | 0.63         | 258.67  | 0.364 |
| 151. | LP | (1) | 047     | 805. | RY*(39)Ru52    | 0.15         | 17.65   | 0.046 |
| 151. | LP | (1) | 047     | 806. | RY*(40)Ru52    | 0.09         | 54.32   | 0.063 |
| 151. | LP | (1) | 047     | 809. | RY*(43)Ru52    | 0.10         | 18.37   | 0.038 |
| 151. | LP | (1) | 047     | 810. | RY*(44)Ru52    | 0.06         | 54.41   | 0.050 |
| 151. | LP | (1) | 047     | 811. | RY*(45)Ru52    | 0.14         | 51.07   | 0.077 |
| 151. | LP | (1) | 047     | 812. | RY*(46)Ru52    | 0.09         | 186.49  | 0.115 |
| 151. | LP | (1) | 047     | 873. | BD*(2)C4-044   | 0.23         | 0.36    | 0.008 |
| 151. | LP | (1) | 047     | 875. | BD*(1)C4-Ru52  | 9.81         | 0.48    | 0.066 |
| 151. | LP | (1) | 047     | 876. | BD*(1)C10-Ru52 | 0.79         | 0.49    | 0.019 |
| 151. | LP | (1) | 047     | 884. | BD*(1)C2-N50   | 0.11         | 0.81    | 0.008 |
| 151. | LP | (1) | 047     | 887. | BD*(2)C7-N50   | 0.08         | 0.33    | 0.005 |
| 151. | LP | (1) | 047     | 895. | BD*(1)C11-C15  | 0.21         | 0.88    | 0.012 |
| 151. | LP | (1) | 047     | 896. | BD*(2)C11-C15  | 0.18         | 0.39    | 0.008 |
| 152. | LP | (2) | 047     | 221. | RY*(9)C4       | 0.09         | 4.86    | 0.020 |
| 152. | LP | (2) | 047     | 226. | RY*(14)C4      | 0.06         | 45.98   | 0.050 |
| 152. | LP | (2) | 047     | 326. | RY*(9)C11      | 0.06         | 13.37   | 0.026 |
| 152. | LP | (2) | 047     | 332. | RY*(15)C11     | 0.05         | 27.42   | 0.035 |
| 152. | LP | (2) | 047     | 768. | RY*(2)Ru52     | 0.09         | 4.10    | 0.018 |
| 152. | LP | (2) | 047     | 769. | RY*(3)Ru52     | 0.14         | 2.17    | 0.016 |
| 152. | LP | (2) | 047     | 775. | RY*(9)Ru52     | 0.33         | 10.58   | 0.056 |
| 152. | LP | (2) | 047     | 777. | RY*(11)Ru52    | 0.07         | 5.54    | 0.019 |
| 152. | LP | (2) | 047     | 780. | RY*(14)Ru52    | 0.17         | 9.35    | 0.038 |
| 152. | LP | (2) | 047     | 783. | RY*(17)Ru52    | 0.08         | 13.03   | 0.031 |
| 152. | LP | (2) | 047     | 784. | RY*(18)Ru52    | 0.14         | 6.51    | 0.029 |
| 152. | LP | (2) | 047     | 785. | RY*(19)Ru52    | 0.11         | 7.68    | 0.028 |
| 152. | LP | (2) | 047     | 789. | RY*(23)Ru52    | 0.07         | 11.00   | 0.025 |
| 152. | LP | (2) | 047     | 805. | RY*(39)Ru52    | 0.13         | 17.84   | 0.047 |
| 152. | LP | (2) | 047     | 806. | RY*(40)Ru52    | 0.07         | 54.51   | 0.058 |
| 152. | LP | (2) | 047     | 809. | RY*(43)Ru52    | 0.10         | 18.55   | 0.041 |
| 152. | LP | (2) | 047     | 810. | RY*(44)Ru52    | 0.06         | 54.60   | 0.053 |
| 152. | LP | (2) | 047     | 872. | BD*(1)C4-044   | 0.10         | 0.55    | 0.007 |
| 152. | LP | (2) | 047     | 875. | BD*(1)C4-Ru52  | 43.98        | 0.67    | 0.156 |
| 152. | LP | (2) | 047     | 876. | BD*(1)C10-Ru52 | 0.05         | 0.67    | 0.005 |
| 152. | LP | (2) | 047     | 878. | BD*(2)C10-048  | 0.19         | 0.55    | 0.009 |
| 152. | LP | (2) | 047     | 879. | BD*(3)C10-048  | 0.43         | 1.13    | 0.021 |
| 152. | LP | (2) | 047     | 884. | BD*(1)C2-N50   | 0.07         | 1.00    | 0.008 |
| 152. | LP | (2) | 047     | 886. | BD*(1)C7-N50   | 0.10         | 0.98    | 0.009 |
| 152. | LP | (2) | 047     | 887. | BD*(2)C7-N50   | 0.12         | 0.52    | 0.007 |
| 152. | LP | (2) | 047     | 895. | BD*(1)C11-C15  | 0.19         | 1.06    | 0.013 |
| 152. | LP | (2) | 047     | 896. | BD*(2)C11-C15  | 0.27         | 0.58    | 0.011 |
| 153. | LP | (3) | 047     | 216. | RY*(4)C4       | 0.16         | 2.45    | 0.019 |
| 153. | LP | (3) | 047     | 219. | RY*(7)C4       | 0.16         | 6.93    | 0.033 |
| 153. | LP | (3) | 047     | 226. | RY*(14)C4      | 0.07         | 45.69   | 0.055 |

|                       |    |      |          |      |         |          |              |         |       |
|-----------------------|----|------|----------|------|---------|----------|--------------|---------|-------|
| 153.                  | LP | ( 3) | 047      | 383. | RY*( 6) | C15      | 0.06         | 3.52    | 0.014 |
| 153.                  | LP | ( 3) | 047      | 743. | RY*( 7) | N50      | 0.05         | 2.66    | 0.011 |
| 153.                  | LP | ( 3) | 047      | 767. | RY*( 1) | Ru52     | 0.31         | 7.07    | 0.046 |
| 153.                  | LP | ( 3) | 047      | 768. | RY*( 2) | Ru52     | 0.08         | 3.80    | 0.017 |
| 153.                  | LP | ( 3) | 047      | 770. | RY*( 4) | Ru52     | 0.37         | 2.57    | 0.030 |
| 153.                  | LP | ( 3) | 047      | 772. | RY*( 6) | Ru52     | 0.05         | 4.67    | 0.015 |
| 153.                  | LP | ( 3) | 047      | 773. | RY*( 7) | Ru52     | 0.58         | 8.50    | 0.068 |
| 153.                  | LP | ( 3) | 047      | 775. | RY*( 9) | Ru52     | 0.55         | 10.28   | 0.073 |
| 153.                  | LP | ( 3) | 047      | 776. | RY*(10) | Ru52     | 0.28         | 8.62    | 0.047 |
| 153.                  | LP | ( 3) | 047      | 778. | RY*(12) | Ru52     | 0.16         | 6.17    | 0.031 |
| 153.                  | LP | ( 3) | 047      | 779. | RY*(13) | Ru52     | 0.19         | 15.00   | 0.052 |
| 153.                  | LP | ( 3) | 047      | 780. | RY*(14) | Ru52     | 0.31         | 9.06    | 0.051 |
| 153.                  | LP | ( 3) | 047      | 781. | RY*(15) | Ru52     | 0.10         | 7.81    | 0.027 |
| 153.                  | LP | ( 3) | 047      | 783. | RY*(17) | Ru52     | 0.10         | 12.74   | 0.035 |
| 153.                  | LP | ( 3) | 047      | 785. | RY*(19) | Ru52     | 0.09         | 7.39    | 0.025 |
| 153.                  | LP | ( 3) | 047      | 786. | RY*(20) | Ru52     | 0.07         | 10.52   | 0.026 |
| 153.                  | LP | ( 3) | 047      | 788. | RY*(22) | Ru52     | 0.06         | 10.00   | 0.023 |
| 153.                  | LP | ( 3) | 047      | 789. | RY*(23) | Ru52     | 0.20         | 10.71   | 0.045 |
| 153.                  | LP | ( 3) | 047      | 790. | RY*(24) | Ru52     | 0.2213605.21 |         | 1.678 |
| 153.                  | LP | ( 3) | 047      | 791. | RY*(25) | Ru52     | 0.1333394.64 |         | 2.010 |
| 153.                  | LP | ( 3) | 047      | 792. | RY*(26) | Ru52     | 0.27         | 1159.66 | 0.545 |
| 153.                  | LP | ( 3) | 047      | 795. | RY*(29) | Ru52     | 0.28         | 53.20   | 0.118 |
| 153.                  | LP | ( 3) | 047      | 796. | RY*(30) | Ru52     | 0.24         | 18.86   | 0.066 |
| 153.                  | LP | ( 3) | 047      | 804. | RY*(38) | Ru52     | 0.31         | 258.57  | 0.273 |
| 153.                  | LP | ( 3) | 047      | 874. | BD*( 3) | C 4- O44 | 0.10         | 0.87    | 0.009 |
| 153.                  | LP | ( 3) | 047      | 875. | BD*( 1) | C 4-Ru52 | 26.41        | 0.37    | 0.089 |
| 153.                  | LP | ( 3) | 047      | 877. | BD*( 1) | C10- O48 | 0.11         | 0.28    | 0.005 |
| 153.                  | LP | ( 3) | 047      | 879. | BD*( 3) | C10- O48 | 0.52         | 0.84    | 0.020 |
| 153.                  | LP | ( 3) | 047      | 884. | BD*( 1) | C 2- N50 | 0.16         | 0.71    | 0.010 |
| 153.                  | LP | ( 3) | 047      | 887. | BD*( 2) | C 7- N50 | 0.11         | 0.23    | 0.005 |
| 153.                  | LP | ( 3) | 047      | 894. | BD*( 1) | C11-Ru52 | 1.11         | 0.28    | 0.016 |
| 153.                  | LP | ( 3) | 047      | 895. | BD*( 1) | C11- C15 | 0.21         | 0.77    | 0.012 |
| 153.                  | LP | ( 3) | 047      | 896. | BD*( 2) | C11- C15 | 0.82         | 0.29    | 0.014 |
| from unit 3 to unit 2 |    |      |          |      |         |          |              |         |       |
| 72.                   | BD | ( 1) | H43- O47 | 167. | LP*( 1) | C16      | 0.35         | 0.53    | 0.016 |
| 72.                   | BD | ( 1) | H43- O47 | 243. | RY*( 1) | C 6      | 0.11         | 2.46    | 0.014 |
| 72.                   | BD | ( 1) | H43- O47 | 245. | RY*( 3) | C 6      | 0.16         | 3.23    | 0.020 |
| 72.                   | BD | ( 1) | H43- O47 | 249. | RY*( 7) | C 6      | 0.29         | 7.55    | 0.042 |
| 72.                   | BD | ( 1) | H43- O47 | 273. | RY*( 1) | C 8      | 0.16         | 2.36    | 0.017 |
| 72.                   | BD | ( 1) | H43- O47 | 274. | RY*( 2) | C 8      | 0.05         | 1.73    | 0.009 |
| 72.                   | BD | ( 1) | H43- O47 | 279. | RY*( 7) | C 8      | 0.17         | 7.21    | 0.031 |
| 72.                   | BD | ( 1) | H43- O47 | 338. | RY*( 6) | C12      | 0.09         | 3.49    | 0.016 |
| 72.                   | BD | ( 1) | H43- O47 | 393. | RY*( 1) | C16      | 0.31         | 1.67    | 0.020 |
| 72.                   | BD | ( 1) | H43- O47 | 395. | RY*( 3) | C16      | 0.09         | 1.63    | 0.011 |
| 72.                   | BD | ( 1) | H43- O47 | 396. | RY*( 4) | C16      | 0.11         | 2.80    | 0.016 |
| 72.                   | BD | ( 1) | H43- O47 | 398. | RY*( 6) | C16      | 0.07         | 3.25    | 0.014 |
| 72.                   | BD | ( 1) | H43- O47 | 399. | RY*( 7) | C16      | 0.07         | 5.22    | 0.017 |
| 72.                   | BD | ( 1) | H43- O47 | 403. | RY*(11) | C16      | 0.07         | 3.69    | 0.014 |
| 72.                   | BD | ( 1) | H43- O47 | 423. | RY*( 1) | C18      | 0.05         | 2.26    | 0.010 |
| 72.                   | BD | ( 1) | H43- O47 | 424. | RY*( 2) | C18      | 0.05         | 1.11    | 0.007 |
| 72.                   | BD | ( 1) | H43- O47 | 428. | RY*( 6) | C18      | 0.14         | 3.62    | 0.020 |
| 72.                   | BD | ( 1) | H43- O47 | 429. | RY*( 7) | C18      | 0.06         | 8.56    | 0.021 |
| 72.                   | BD | ( 1) | H43- O47 | 458. | RY*( 6) | C20      | 0.07         | 3.49    | 0.014 |
| 72.                   | BD | ( 1) | H43- O47 | 459. | RY*( 7) | C20      | 0.10         | 3.72    | 0.017 |
| 72.                   | BD | ( 1) | H43- O47 | 465. | RY*(13) | C20      | 0.05         | 24.05   | 0.032 |
| 72.                   | BD | ( 1) | H43- O47 | 483. | RY*( 1) | C22      | 0.10         | 1.97    | 0.013 |
| 72.                   | BD | ( 1) | H43- O47 | 486. | RY*( 4) | C22      | 0.11         | 1.77    | 0.013 |
| 72.                   | BD | ( 1) | H43- O47 | 487. | RY*( 5) | C22      | 0.08         | 4.59    | 0.017 |
| 72.                   | BD | ( 1) | H43- O47 | 570. | RY*( 3) | H29      | 0.05         | 1.77    | 0.008 |
| 72.                   | BD | ( 1) | H43- O47 | 676. | RY*( 4) | O46      | 0.05         | 1.34    | 0.007 |
| 72.                   | BD | ( 1) | H43- O47 | 679. | RY*( 7) | O46      | 0.07         | 2.67    | 0.013 |
| 72.                   | BD | ( 1) | H43- O47 | 753. | RY*( 2) | N51      | 0.12         | 1.48    | 0.012 |
| 72.                   | BD | ( 1) | H43- O47 | 755. | RY*( 4) | N51      | 0.16         | 5.56    | 0.027 |
| 72.                   | BD | ( 1) | H43- O47 | 759. | RY*( 8) | N51      | 0.05         | 14.62   | 0.024 |
| 72.                   | BD | ( 1) | H43- O47 | 815. | RY*( 1) | Ru53     | 0.43         | 7.59    | 0.051 |
| 72.                   | BD | ( 1) | H43- O47 | 816. | RY*( 2) | Ru53     | 0.31         | 2.46    | 0.025 |
| 72.                   | BD | ( 1) | H43- O47 | 817. | RY*( 3) | Ru53     | 1.64         | 1.75    | 0.048 |
| 72.                   | BD | ( 1) | H43- O47 | 818. | RY*( 4) | Ru53     | 0.23         | 2.84    | 0.023 |
| 72.                   | BD | ( 1) | H43- O47 | 819. | RY*( 5) | Ru53     | 0.38         | 7.05    | 0.047 |
| 72.                   | BD | ( 1) | H43- O47 | 820. | RY*( 6) | Ru53     | 0.05         | 4.14    | 0.013 |
| 72.                   | BD | ( 1) | H43- O47 | 821. | RY*( 7) | Ru53     | 0.29         | 3.65    | 0.029 |
| 72.                   | BD | ( 1) | H43- O47 | 822. | RY*( 8) | Ru53     | 0.96         | 5.24    | 0.063 |
| 72.                   | BD | ( 1) | H43- O47 | 823. | RY*( 9) | Ru53     | 1.03         | 9.71    | 0.089 |
| 72.                   | BD | ( 1) | H43- O47 | 824. | RY*(10) | Ru53     | 0.10         | 7.67    | 0.025 |
| 72.                   | BD | ( 1) | H43- O47 | 825. | RY*(11) | Ru53     | 0.13         | 6.61    | 0.027 |
| 72.                   | BD | ( 1) | H43- O47 | 826. | RY*(12) | Ru53     | 0.40         | 3.52    | 0.033 |
| 72.                   | BD | ( 1) | H43- O47 | 827. | RY*(13) | Ru53     | 0.79         | 14.37   | 0.095 |
| 72.                   | BD | ( 1) | H43- O47 | 829. | RY*(15) | Ru53     | 0.09         | 7.75    | 0.024 |
| 72.                   | BD | ( 1) | H43- O47 | 830. | RY*(16) | Ru53     | 0.22         | 7.06    | 0.036 |
| 72.                   | BD | ( 1) | H43- O47 | 831. | RY*(17) | Ru53     | 0.65         | 13.05   | 0.082 |
| 72.                   | BD | ( 1) | H43- O47 | 832. | RY*(18) | Ru53     | 0.39         | 5.84    | 0.043 |
| 72.                   | BD | ( 1) | H43- O47 | 833. | RY*(19) | Ru53     | 0.13         | 7.61    | 0.028 |
| 72.                   | BD | ( 1) | H43- O47 | 834. | RY*(20) | Ru53     | 0.23         | 12.02   | 0.047 |
| 72.                   | BD | ( 1) | H43- O47 | 835. | RY*(21) | Ru53     | 0.12         | 12.94   | 0.036 |
| 72.                   | BD | ( 1) | H43- O47 | 836. | RY*(22) | Ru53     | 0.71         | 11.19   | 0.080 |
| 72.                   | BD | ( 1) | H43- O47 | 838. | RY*(24) | Ru53     | 0.5935647.44 |         | 4.090 |
| 72.                   | BD | ( 1) | H43- O47 | 839. | RY*(25) | Ru53     | 0.67         | 5348.49 | 1.694 |
| 72.                   | BD | ( 1) | H43- O47 | 840. | RY*(26) | Ru53     | 1.14         | 5744.11 | 2.292 |
| 72.                   | BD | ( 1) | H43- O47 | 841. | RY*(27) | Ru53     | 0.31         | 49.90   | 0.111 |
| 72.                   | BD | ( 1) | H43- O47 | 842. | RY*(28) | Ru53     | 0.20         | 186.73  | 0.173 |
| 72.                   | BD | ( 1) | H43- O47 | 843. | RY*(29) | Ru53     | 0.20         | 10.75   | 0.042 |
| 72.                   | BD | ( 1) | H43- O47 | 844. | RY*(30) | Ru53     | 0.65         | 33.04   | 0.131 |
| 72.                   | BD | ( 1) | H43- O47 | 847. | RY*(33) | Ru53     | 1.01         | 278.14  | 0.474 |
| 72.                   | BD | ( 1) | H43- O47 | 852. | RY*(38) | Ru53     | 1.10         | 356.31  | 0.561 |
| 72.                   | BD | ( 1) | H43- O47 | 855. | RY*(41) | Ru53     | 0.44         | 141.25  | 0.223 |
| 72.                   | BD | ( 1) | H43- O47 | 856. | RY*(42) | Ru53     | 0.94         | 3163.06 | 1.541 |
| 72.                   | BD | ( 1) | H43- O47 | 906. | BD*( 1) | C 6-Ru53 | 0.17         | 0.74    | 0.011 |
| 72.                   | BD | ( 1) | H43- O47 | 907. | BD*( 1) | C 8-Ru53 | 6.11         | 0.74    | 0.055 |
| 72.                   | BD | ( 1) | H43- O47 | 928. | BD*( 1) | C16- C18 | 0.05         | 1.13    | 0.007 |
| 102.                  | CR | ( 1) | 047      | 907. | BD*( 1) | C 8-Ru53 | 5.19         | 18.71   | 0.301 |
| 151.                  | LP | ( 1) | 047      | 167. | LP*( 1) | C16      | 0.17         | 0.28    | 0.008 |
| 151.                  | LP | ( 1) | 047      | 243. | RY*( 1) | C 6      | 0.05         | 2.21    | 0.010 |
| 151.                  | LP | ( 1) | 047      | 244. | RY*( 2) | C 6      | 0.06         | 1.39    | 0.008 |
| 151.                  | LP | ( 1) | 047      | 245. | RY*( 3) | C 6      | 0.09         | 2.98    | 0.014 |
| 151.                  | LP | ( 1) | 047      | 396. | RY*( 4) | C16      | 0.06         | 2.55    | 0.011 |
| 151.                  | LP | ( 1) | 047      | 401. | RY*( 9) | C16      | 0.06         | 13.26   | 0.025 |
| 151.                  | LP | ( 1) | 047      | 815. | RY*( 1) | Ru53     | 0.18         | 7.34    | 0.033 |
| 151.                  | LP | ( 1) | 047      | 816. | RY*( 2) | Ru53     | 0.35         | 2.21    | 0.025 |
| 151.                  | LP | ( 1) | 047      | 819. | RY*( 5) | Ru53     | 0.23         | 6.80    | 0.036 |
| 151.                  | LP | ( 1) | 047      | 820. | RY*( 6) | Ru53     | 0.38         | 3.89    | 0.035 |
| 151.                  | LP | ( 1) | 047      | 822. | RY*( 8) | Ru53     | 0.07         | 4.99    | 0.017 |
| 151.                  | LP | ( 1) | 047      | 823. | RY*( 9) | Ru53     | 0.28         | 9.45    | 0.046 |
| 151.                  | LP | ( 1) | 047      | 824. | RY*(10) | Ru53     | 0.14         | 7.42    | 0.029 |
| 151.                  | LP | ( 1) | 047      | 825. | RY*(11) | Ru53     | 0.07         | 6.36    | 0.018 |
| 151.                  | LP | ( 1) | 047      | 827. | RY*(13) | Ru53     | 0.07         | 14.12   | 0.029 |

|                       |                        |              |         |       |
|-----------------------|------------------------|--------------|---------|-------|
| 151. LP ( 1) 047      | 828. RY*(14) Ru53      | 0.33         | 9.02    | 0.049 |
| 151. LP ( 1) 047      | 831. RY*(17) Ru53      | 0.19         | 12.80   | 0.045 |
| 151. LP ( 1) 047      | 832. RY*(18) Ru53      | 0.18         | 5.59    | 0.029 |
| 151. LP ( 1) 047      | 833. RY*(19) Ru53      | 0.37         | 7.36    | 0.047 |
| 151. LP ( 1) 047      | 834. RY*(20) Ru53      | 0.18         | 11.77   | 0.041 |
| 151. LP ( 1) 047      | 836. RY*(22) Ru53      | 0.19         | 10.94   | 0.041 |
| 151. LP ( 1) 047      | 838. RY*(24) Ru53      | 0.1835647.19 | 2.264   |       |
| 151. LP ( 1) 047      | 839. RY*(25) Ru53      | 0.20         | 5348.23 | 0.932 |
| 151. LP ( 1) 047      | 840. RY*(26) Ru53      | 0.34         | 5743.86 | 1.257 |
| 151. LP ( 1) 047      | 843. RY*(29) Ru53      | 0.05         | 10.50   | 0.021 |
| 151. LP ( 1) 047      | 844. RY*(30) Ru53      | 0.17         | 32.79   | 0.067 |
| 151. LP ( 1) 047      | 845. RY*(31) Ru53      | 0.17         | 18.43   | 0.050 |
| 151. LP ( 1) 047      | 846. RY*(32) Ru53      | 0.12         | 54.21   | 0.072 |
| 151. LP ( 1) 047      | 847. RY*(33) Ru53      | 0.28         | 277.89  | 0.251 |
| 151. LP ( 1) 047      | 848. RY*(34) Ru53      | 0.15         | 51.29   | 0.078 |
| 151. LP ( 1) 047      | 851. RY*(37) Ru53      | 0.09         | 186.63  | 0.119 |
| 151. LP ( 1) 047      | 852. RY*(38) Ru53      | 0.32         | 356.05  | 0.305 |
| 151. LP ( 1) 047      | 855. RY*(41) Ru53      | 0.14         | 141.00  | 0.124 |
| 151. LP ( 1) 047      | 856. RY*(42) Ru53      | 0.29         | 3162.81 | 0.856 |
| 151. LP ( 1) 047      | 904. BD*( 2) C 6- O45  | 0.10         | 0.37    | 0.006 |
| 151. LP ( 1) 047      | 905. BD*( 3) C 6- O45  | 0.15         | 0.95    | 0.011 |
| 151. LP ( 1) 047      | 907. BD*( 1) C 8- Ru53 | 9.45         | 0.48    | 0.065 |
| 151. LP ( 1) 047      | 908. BD*( 1) C 8- O46  | 0.07         | 0.36    | 0.005 |
| 151. LP ( 1) 047      | 909. BD*( 2) C 8- O46  | 0.14         | 0.36    | 0.007 |
| 151. LP ( 1) 047      | 927. BD*( 1) C16- C22  | 0.13         | 0.86    | 0.009 |
| 152. LP ( 2) 047      | 167. LP*( 1) C16       | 0.54         | 0.47    | 0.017 |
| 152. LP ( 2) 047      | 281. RY*( 9) C 8       | 0.12         | 4.93    | 0.023 |
| 152. LP ( 2) 047      | 286. RY*(14) C 8       | 0.07         | 46.13   | 0.053 |
| 152. LP ( 2) 047      | 818. RY*( 4) Ru53      | 0.07         | 2.77    | 0.013 |
| 152. LP ( 2) 047      | 823. RY*( 9) Ru53      | 0.16         | 9.64    | 0.038 |
| 152. LP ( 2) 047      | 825. RY*(11) Ru53      | 0.14         | 6.55    | 0.029 |
| 152. LP ( 2) 047      | 828. RY*(14) Ru53      | 0.24         | 9.20    | 0.045 |
| 152. LP ( 2) 047      | 831. RY*(17) Ru53      | 0.06         | 12.98   | 0.027 |
| 152. LP ( 2) 047      | 832. RY*(18) Ru53      | 0.06         | 5.78    | 0.017 |
| 152. LP ( 2) 047      | 845. RY*(31) Ru53      | 0.11         | 18.62   | 0.044 |
| 152. LP ( 2) 047      | 846. RY*(32) Ru53      | 0.07         | 54.40   | 0.059 |
| 152. LP ( 2) 047      | 857. RY*(43) Ru53      | 0.07         | 19.48   | 0.036 |
| 152. LP ( 2) 047      | 904. BD*( 2) C 6- O45  | 0.21         | 0.56    | 0.010 |
| 152. LP ( 2) 047      | 905. BD*( 3) C 6- O45  | 0.45         | 1.14    | 0.021 |
| 152. LP ( 2) 047      | 906. BD*( 1) C 6- Ru53 | 0.08         | 0.67    | 0.007 |
| 152. LP ( 2) 047      | 907. BD*( 1) C 8- Ru53 | 47.32        | 0.67    | 0.162 |
| 152. LP ( 2) 047      | 908. BD*( 1) C 8- O46  | 0.09         | 0.55    | 0.006 |
| 152. LP ( 2) 047      | 913. BD*( 1) C12- N51  | 0.09         | 0.99    | 0.009 |
| 152. LP ( 2) 047      | 921. BD*( 1) C20- N51  | 0.12         | 0.98    | 0.010 |
| 152. LP ( 2) 047      | 922. BD*( 2) C20- N51  | 0.09         | 0.51    | 0.007 |
| 152. LP ( 2) 047      | 927. BD*( 1) C16- C22  | 0.05         | 1.05    | 0.007 |
| 152. LP ( 2) 047      | 928. BD*( 1) C16- C18  | 0.20         | 1.06    | 0.014 |
| 153. LP ( 3) 047      | 167. LP*( 1) C16       | 1.34         | 0.18    | 0.016 |
| 153. LP ( 3) 047      | 276. RY*( 4) C 8       | 0.12         | 2.49    | 0.017 |
| 153. LP ( 3) 047      | 279. RY*( 7) C 8       | 0.10         | 6.85    | 0.025 |
| 153. LP ( 3) 047      | 286. RY*(14) C 8       | 0.08         | 45.84   | 0.060 |
| 153. LP ( 3) 047      | 287. RY*(15) C 8       | 0.06         | 26.79   | 0.038 |
| 153. LP ( 3) 047      | 815. RY*( 1) Ru53      | 0.13         | 7.23    | 0.030 |
| 153. LP ( 3) 047      | 816. RY*( 2) Ru53      | 0.12         | 2.10    | 0.016 |
| 153. LP ( 3) 047      | 819. RY*( 5) Ru53      | 0.14         | 6.69    | 0.030 |
| 153. LP ( 3) 047      | 820. RY*( 6) Ru53      | 0.35         | 3.78    | 0.035 |
| 153. LP ( 3) 047      | 821. RY*( 7) Ru53      | 0.07         | 3.29    | 0.014 |
| 153. LP ( 3) 047      | 823. RY*( 9) Ru53      | 0.22         | 9.35    | 0.044 |
| 153. LP ( 3) 047      | 824. RY*(10) Ru53      | 0.19         | 7.31    | 0.036 |
| 153. LP ( 3) 047      | 828. RY*(14) Ru53      | 0.06         | 8.91    | 0.022 |
| 153. LP ( 3) 047      | 829. RY*(15) Ru53      | 0.06         | 7.39    | 0.020 |
| 153. LP ( 3) 047      | 832. RY*(18) Ru53      | 0.06         | 5.48    | 0.018 |
| 153. LP ( 3) 047      | 833. RY*(19) Ru53      | 0.06         | 7.25    | 0.020 |
| 153. LP ( 3) 047      | 836. RY*(22) Ru53      | 0.09         | 10.84   | 0.031 |
| 153. LP ( 3) 047      | 837. RY*(23) Ru53      | 0.07         | 8.80    | 0.024 |
| 153. LP ( 3) 047      | 838. RY*(24) Ru53      | 0.1035647.08 | 1.841   |       |
| 153. LP ( 3) 047      | 839. RY*(25) Ru53      | 0.09         | 5348.13 | 0.665 |
| 153. LP ( 3) 047      | 840. RY*(26) Ru53      | 0.18         | 5743.75 | 0.999 |
| 153. LP ( 3) 047      | 844. RY*(30) Ru53      | 0.06         | 32.68   | 0.042 |
| 153. LP ( 3) 047      | 847. RY*(33) Ru53      | 0.13         | 277.78  | 0.187 |
| 153. LP ( 3) 047      | 848. RY*(34) Ru53      | 0.09         | 51.19   | 0.065 |
| 153. LP ( 3) 047      | 851. RY*(37) Ru53      | 0.06         | 186.53  | 0.099 |
| 153. LP ( 3) 047      | 852. RY*(38) Ru53      | 0.16         | 355.95  | 0.234 |
| 153. LP ( 3) 047      | 855. RY*(41) Ru53      | 0.08         | 140.90  | 0.101 |
| 153. LP ( 3) 047      | 856. RY*(42) Ru53      | 0.15         | 3162.71 | 0.662 |
| 153. LP ( 3) 047      | 903. BD*( 1) C 6- O45  | 0.07         | 0.27    | 0.004 |
| 153. LP ( 3) 047      | 904. BD*( 2) C 6- O45  | 0.09         | 0.27    | 0.004 |
| 153. LP ( 3) 047      | 905. BD*( 3) C 6- O45  | 0.48         | 0.85    | 0.019 |
| 153. LP ( 3) 047      | 907. BD*( 1) C 8- Ru53 | 21.15        | 0.38    | 0.080 |
| 153. LP ( 3) 047      | 908. BD*( 1) C 8- O46  | 0.07         | 0.26    | 0.004 |
| 153. LP ( 3) 047      | 910. BD*( 3) C 8- O46  | 0.09         | 0.87    | 0.008 |
| 153. LP ( 3) 047      | 913. BD*( 1) C12- N51  | 0.13         | 0.70    | 0.009 |
| 153. LP ( 3) 047      | 922. BD*( 2) C20- N51  | 0.05         | 0.22    | 0.003 |
| 153. LP ( 3) 047      | 926. BD*( 1) C16- Ru53 | 1.18         | 0.27    | 0.016 |
| 153. LP ( 3) 047      | 928. BD*( 1) C16- C18  | 0.15         | 0.77    | 0.010 |
| within unit 3         |                        |              |         |       |
| 152. LP ( 2) 047      | 640. RY*( 3) H43       | 0.58         | 2.53    | 0.036 |
| 153. LP ( 3) 047      | 641. RY*( 4) H43       | 0.74         | 2.41    | 0.041 |
| from unit 3 to unit 4 |                        |              |         |       |
| 72. BD ( 1) H43- O47  | 719. RY*( 2) C149      | 0.42         | 2.41    | 0.028 |
| 72. BD ( 1) H43- O47  | 721. RY*( 4) C149      | 0.48         | 3.21    | 0.035 |
| 72. BD ( 1) H43- O47  | 722. RY*( 5) C149      | 0.62         | 2.92    | 0.038 |
| 72. BD ( 1) H43- O47  | 723. RY*( 6) C149      | 0.12         | 3.66    | 0.018 |
| 72. BD ( 1) H43- O47  | 725. RY*( 8) C149      | 0.20         | 5.87    | 0.031 |
| 151. LP ( 1) 047      | 719. RY*( 2) C149      | 0.34         | 2.15    | 0.024 |
| 151. LP ( 1) 047      | 720. RY*( 3) C149      | 0.07         | 2.26    | 0.011 |
| 151. LP ( 1) 047      | 721. RY*( 4) C149      | 0.42         | 2.96    | 0.032 |
| 151. LP ( 1) 047      | 722. RY*( 5) C149      | 0.58         | 2.67    | 0.035 |
| 151. LP ( 1) 047      | 723. RY*( 6) C149      | 0.13         | 3.41    | 0.019 |
| 151. LP ( 1) 047      | 725. RY*( 8) C149      | 0.12         | 5.62    | 0.023 |
| 153. LP ( 3) 047      | 720. RY*( 3) C149      | 0.14         | 2.15    | 0.017 |
| from unit 4 to unit 1 |                        |              |         |       |
| 104. CR ( 1) C149     | 894. BD*( 1) C11- Ru52 | 0.47         | 100.11  | 0.211 |
| 105. CR ( 2) C149     | 767. RY*( 1) Ru52      | 0.05         | 17.03   | 0.026 |
| 105. CR ( 2) C149     | 894. BD*( 1) C11- Ru52 | 3.75         | 10.24   | 0.189 |
| 106. CR ( 3) C149     | 894. BD*( 1) C11- Ru52 | 0.08         | 6.95    | 0.023 |
| 107. CR ( 4) C149     | 894. BD*( 1) C11- Ru52 | 0.19         | 6.95    | 0.035 |
| 108. CR ( 5) C149     | 894. BD*( 1) C11- Ru52 | 0.08         | 6.95    | 0.022 |
| 155. LP ( 1) C149     | 767. RY*( 1) Ru52      | 0.25         | 7.53    | 0.039 |
| 155. LP ( 1) C149     | 768. RY*( 2) Ru52      | 0.09         | 4.26    | 0.018 |
| 155. LP ( 1) C149     | 771. RY*( 5) Ru52      | 0.05         | 7.61    | 0.018 |
| 155. LP ( 1) C149     | 773. RY*( 7) Ru52      | 0.11         | 8.96    | 0.028 |
| 155. LP ( 1) C149     | 776. RY*(10) Ru52      | 0.05         | 9.08    | 0.020 |

|      |    |         |      |                  |              |         |       |
|------|----|---------|------|------------------|--------------|---------|-------|
| 155. | LP | (1)C149 | 779. | RY*(13)Ru52      | 0.16         | 15.46   | 0.044 |
| 155. | LP | (1)C149 | 781. | RY*(15)Ru52      | 0.20         | 8.27    | 0.036 |
| 155. | LP | (1)C149 | 782. | RY*(16)Ru52      | 0.20         | 7.12    | 0.034 |
| 155. | LP | (1)C149 | 789. | RY*(23)Ru52      | 0.15         | 11.16   | 0.037 |
| 155. | LP | (1)C149 | 790. | RY*(24)Ru52      | 0.0913605.66 |         | 1.007 |
| 155. | LP | (1)C149 | 792. | RY*(26)Ru52      | 0.10         | 1160.12 | 0.311 |
| 155. | LP | (1)C149 | 795. | RY*(29)Ru52      | 0.11         | 53.66   | 0.070 |
| 155. | LP | (1)C149 | 796. | RY*(30)Ru52      | 0.07         | 19.32   | 0.033 |
| 155. | LP | (1)C149 | 801. | RY*(35)Ru52      | 0.05         | 19.47   | 0.028 |
| 155. | LP | (1)C149 | 804. | RY*(38)Ru52      | 0.12         | 259.03  | 0.157 |
| 155. | LP | (1)C149 | 872. | BD*(1) C 4- O44  | 0.08         | 0.72    | 0.007 |
| 155. | LP | (1)C149 | 877. | BD*(1) C10- O48  | 0.09         | 0.74    | 0.008 |
| 155. | LP | (1)C149 | 881. | BD*(1) C 1- C 2  | 0.12         | 1.19    | 0.011 |
| 155. | LP | (1)C149 | 886. | BD*(1) C 7- N50  | 0.07         | 1.15    | 0.008 |
| 155. | LP | (1)C149 | 894. | BD*(1) C11- Ru52 | 8.71         | 0.73    | 0.077 |
| 156. | LP | (2)C149 | 558. | RY*(1) H27       | 0.13         | 1.71    | 0.014 |
| 156. | LP | (2)C149 | 767. | RY*(1)Ru52       | 0.05         | 7.04    | 0.017 |
| 156. | LP | (2)C149 | 768. | RY*(2)Ru52       | 0.10         | 3.78    | 0.018 |
| 156. | LP | (2)C149 | 771. | RY*(5)Ru52       | 0.06         | 7.13    | 0.019 |
| 156. | LP | (2)C149 | 781. | RY*(15)Ru52      | 0.14         | 7.78    | 0.029 |
| 156. | LP | (2)C149 | 782. | RY*(16)Ru52      | 0.11         | 6.64    | 0.024 |
| 156. | LP | (2)C149 | 792. | RY*(26)Ru52      | 0.06         | 1159.64 | 0.229 |
| 156. | LP | (2)C149 | 795. | RY*(29)Ru52      | 0.06         | 53.18   | 0.051 |
| 156. | LP | (2)C149 | 796. | RY*(30)Ru52      | 0.05         | 18.84   | 0.028 |
| 156. | LP | (2)C149 | 804. | RY*(38)Ru52      | 0.06         | 258.54  | 0.114 |
| 156. | LP | (2)C149 | 873. | BD*(2) C 4- O44  | 0.06         | 0.23    | 0.004 |
| 156. | LP | (2)C149 | 876. | BD*(1) C10- Ru52 | 0.23         | 0.36    | 0.009 |
| 156. | LP | (2)C149 | 881. | BD*(1) C 1- C 2  | 0.26         | 0.71    | 0.012 |
| 156. | LP | (2)C149 | 882. | BD*(2) C 1- C 2  | 0.06         | 0.22    | 0.003 |
| 156. | LP | (2)C149 | 885. | BD*(1) C 2- H27  | 1.78         | 0.61    | 0.030 |
| 156. | LP | (2)C149 | 886. | BD*(1) C 7- N50  | 0.14         | 0.66    | 0.009 |
| 157. | LP | (3)C149 | 176. | RY*(9) C 1       | 0.11         | 3.49    | 0.019 |
| 157. | LP | (3)C149 | 185. | RY*(3) C 2       | 0.08         | 2.08    | 0.013 |
| 157. | LP | (3)C149 | 188. | RY*(6) C 2       | 0.43         | 3.29    | 0.036 |
| 157. | LP | (3)C149 | 189. | RY*(7) C 2       | 0.25         | 9.77    | 0.047 |
| 157. | LP | (3)C149 | 190. | RY*(8) C 2       | 0.11         | 3.70    | 0.019 |
| 157. | LP | (3)C149 | 213. | RY*(1) C 4       | 0.91         | 2.06    | 0.041 |
| 157. | LP | (3)C149 | 215. | RY*(3) C 4       | 0.11         | 2.07    | 0.014 |
| 157. | LP | (3)C149 | 216. | RY*(4) C 4       | 0.24         | 2.42    | 0.023 |
| 157. | LP | (3)C149 | 218. | RY*(6) C 4       | 0.10         | 2.35    | 0.014 |
| 157. | LP | (3)C149 | 219. | RY*(7) C 4       | 1.19         | 6.90    | 0.086 |
| 157. | LP | (3)C149 | 224. | RY*(12) C 4      | 0.06         | 3.01    | 0.013 |
| 157. | LP | (3)C149 | 258. | RY*(1) C 7       | 0.12         | 1.77    | 0.014 |
| 157. | LP | (3)C149 | 263. | RY*(6) C 7       | 0.28         | 4.47    | 0.034 |
| 157. | LP | (3)C149 | 288. | RY*(1) C 9       | 0.08         | 1.62    | 0.011 |
| 157. | LP | (3)C149 | 290. | RY*(3) C 9       | 0.20         | 2.04    | 0.019 |
| 157. | LP | (3)C149 | 292. | RY*(5) C 9       | 0.36         | 3.45    | 0.033 |
| 157. | LP | (3)C149 | 293. | RY*(6) C 9       | 0.21         | 3.00    | 0.024 |
| 157. | LP | (3)C149 | 303. | RY*(1) C10       | 0.45         | 2.18    | 0.030 |
| 157. | LP | (3)C149 | 306. | RY*(4) C10       | 0.07         | 1.70    | 0.010 |
| 157. | LP | (3)C149 | 309. | RY*(7) C10       | 0.22         | 6.68    | 0.036 |
| 157. | LP | (3)C149 | 310. | RY*(8) C10       | 0.47         | 3.56    | 0.039 |
| 157. | LP | (3)C149 | 314. | RY*(12) C10      | 0.13         | 2.91    | 0.019 |
| 157. | LP | (3)C149 | 318. | RY*(1) C11       | 0.18         | 1.31    | 0.015 |
| 157. | LP | (3)C149 | 321. | RY*(4) C11       | 0.58         | 2.52    | 0.036 |
| 157. | LP | (3)C149 | 323. | RY*(6) C11       | 0.16         | 2.51    | 0.019 |
| 157. | LP | (3)C149 | 324. | RY*(7) C11       | 0.23         | 4.67    | 0.031 |
| 157. | LP | (3)C149 | 326. | RY*(9) C11       | 0.47         | 13.05   | 0.075 |
| 157. | LP | (3)C149 | 328. | RY*(11) C11      | 0.08         | 3.36    | 0.015 |
| 157. | LP | (3)C149 | 329. | RY*(12) C11      | 0.08         | 3.31    | 0.015 |
| 157. | LP | (3)C149 | 330. | RY*(13) C11      | 0.08         | 3.56    | 0.016 |
| 157. | LP | (3)C149 | 331. | RY*(14) C11      | 0.10         | 40.38   | 0.059 |
| 157. | LP | (3)C149 | 332. | RY*(15) C11      | 0.23         | 27.10   | 0.076 |
| 157. | LP | (3)C149 | 378. | RY*(1) C15       | 0.05         | 1.88    | 0.009 |
| 157. | LP | (3)C149 | 380. | RY*(3) C15       | 0.11         | 1.98    | 0.014 |
| 157. | LP | (3)C149 | 381. | RY*(4) C15       | 0.10         | 1.26    | 0.010 |
| 157. | LP | (3)C149 | 383. | RY*(6) C15       | 0.95         | 3.50    | 0.055 |
| 157. | LP | (3)C149 | 384. | RY*(7) C15       | 0.16         | 8.23    | 0.034 |
| 157. | LP | (3)C149 | 417. | RY*(10) C17      | 0.05         | 4.02    | 0.014 |
| 157. | LP | (3)C149 | 558. | RY*(1) H27       | 0.06         | 1.71    | 0.010 |
| 157. | LP | (3)C149 | 560. | RY*(3) H27       | 0.16         | 1.35    | 0.014 |
| 157. | LP | (3)C149 | 561. | RY*(4) H27       | 0.18         | 2.14    | 0.018 |
| 157. | LP | (3)C149 | 562. | RY*(5) H27       | 0.06         | 3.70    | 0.014 |
| 157. | LP | (3)C149 | 565. | RY*(3) H28       | 0.06         | 1.87    | 0.010 |
| 157. | LP | (3)C149 | 575. | RY*(3) H30       | 0.07         | 2.06    | 0.012 |
| 157. | LP | (3)C149 | 592. | RY*(5) H33       | 0.05         | 4.33    | 0.014 |
| 157. | LP | (3)C149 | 595. | RY*(3) H34       | 0.13         | 1.63    | 0.014 |
| 157. | LP | (3)C149 | 630. | RY*(3) H41       | 0.15         | 1.45    | 0.014 |
| 157. | LP | (3)C149 | 645. | RY*(3) O44       | 0.15         | 1.99    | 0.016 |
| 157. | LP | (3)C149 | 646. | RY*(4) O44       | 0.47         | 0.99    | 0.021 |
| 157. | LP | (3)C149 | 647. | RY*(5) O44       | 0.12         | 2.13    | 0.015 |
| 157. | LP | (3)C149 | 648. | RY*(6) O44       | 0.32         | 2.75    | 0.028 |
| 157. | LP | (3)C149 | 649. | RY*(7) O44       | 0.13         | 1.95    | 0.015 |
| 157. | LP | (3)C149 | 653. | RY*(11) O44      | 0.05         | 11.48   | 0.024 |
| 157. | LP | (3)C149 | 705. | RY*(3) O48       | 0.13         | 2.25    | 0.016 |
| 157. | LP | (3)C149 | 706. | RY*(4) O48       | 0.71         | 0.89    | 0.024 |
| 157. | LP | (3)C149 | 707. | RY*(5) O48       | 0.25         | 2.41    | 0.024 |
| 157. | LP | (3)C149 | 709. | RY*(7) O48       | 0.07         | 3.08    | 0.014 |
| 157. | LP | (3)C149 | 713. | RY*(11) O48      | 0.06         | 9.60    | 0.023 |
| 157. | LP | (3)C149 | 737. | RY*(1) N50       | 0.26         | 2.08    | 0.022 |
| 157. | LP | (3)C149 | 740. | RY*(4) N50       | 0.08         | 5.33    | 0.020 |
| 157. | LP | (3)C149 | 745. | RY*(9) N50       | 0.13         | 4.94    | 0.024 |
| 157. | LP | (3)C149 | 767. | RY*(1)Ru52       | 5.02         | 7.04    | 0.178 |
| 157. | LP | (3)C149 | 768. | RY*(2)Ru52       | 3.57         | 3.78    | 0.110 |
| 157. | LP | (3)C149 | 769. | RY*(3)Ru52       | 1.37         | 1.85    | 0.048 |
| 157. | LP | (3)C149 | 770. | RY*(4)Ru52       | 0.63         | 2.55    | 0.038 |
| 157. | LP | (3)C149 | 771. | RY*(5)Ru52       | 2.50         | 7.13    | 0.127 |
| 157. | LP | (3)C149 | 773. | RY*(7)Ru52       | 3.14         | 8.48    | 0.155 |
| 157. | LP | (3)C149 | 775. | RY*(9)Ru52       | 3.55         | 10.26   | 0.181 |
| 157. | LP | (3)C149 | 776. | RY*(10)Ru52      | 2.02         | 8.60    | 0.125 |
| 157. | LP | (3)C149 | 777. | RY*(11)Ru52      | 0.17         | 5.22    | 0.028 |
| 157. | LP | (3)C149 | 778. | RY*(12)Ru52      | 1.38         | 6.14    | 0.088 |
| 157. | LP | (3)C149 | 779. | RY*(13)Ru52      | 3.09         | 14.98   | 0.204 |
| 157. | LP | (3)C149 | 780. | RY*(14)Ru52      | 0.36         | 9.03    | 0.054 |
| 157. | LP | (3)C149 | 781. | RY*(15)Ru52      | 1.77         | 7.78    | 0.111 |
| 157. | LP | (3)C149 | 782. | RY*(16)Ru52      | 0.56         | 6.64    | 0.058 |
| 157. | LP | (3)C149 | 783. | RY*(17)Ru52      | 1.90         | 12.71   | 0.148 |
| 157. | LP | (3)C149 | 784. | RY*(18)Ru52      | 0.23         | 6.19    | 0.036 |
| 157. | LP | (3)C149 | 785. | RY*(19)Ru52      | 0.85         | 7.36    | 0.075 |
| 157. | LP | (3)C149 | 786. | RY*(20)Ru52      | 0.09         | 10.49   | 0.030 |
| 157. | LP | (3)C149 | 787. | RY*(21)Ru52      | 0.49         | 12.73   | 0.075 |
| 157. | LP | (3)C149 | 788. | RY*(22)Ru52      | 0.06         | 9.97    | 0.024 |
| 157. | LP | (3)C149 | 789. | RY*(23)Ru52      | 4.07         | 10.68   | 0.198 |
| 157. | LP | (3)C149 | 790. | RY*(24)Ru52      | 3.0413605.18 |         | 6.108 |
| 157. | LP | (3)C149 | 791. | RY*(25)Ru52      | 1.6633394.62 |         | 7.080 |
| 157. | LP | (3)C149 | 792. | RY*(26)Ru52      | 3.63         | 1159.64 | 1.948 |

|                       |    |         |      |                 |           |         |       |
|-----------------------|----|---------|------|-----------------|-----------|---------|-------|
| 157.                  | LP | (3)C149 | 793. | RY*(27)Ru52     | 0.11      | 50.52   | 0.071 |
| 157.                  | LP | (3)C149 | 794. | RY*(28)Ru52     | 0.06      | 186.38  | 0.103 |
| 157.                  | LP | (3)C149 | 795. | RY*(29)Ru52     | 3.83      | 53.18   | 0.429 |
| 157.                  | LP | (3)C149 | 796. | RY*(30)Ru52     | 3.09      | 18.84   | 0.229 |
| 157.                  | LP | (3)C149 | 799. | RY*(33)Ru52     | 0.64      | 88.45   | 0.226 |
| 157.                  | LP | (3)C149 | 801. | RY*(35)Ru52     | 0.07      | 18.98   | 0.035 |
| 157.                  | LP | (3)C149 | 802. | RY*(36)Ru52     | 0.06      | 54.13   | 0.053 |
| 157.                  | LP | (3)C149 | 804. | RY*(38)Ru52     | 4.07      | 258.54  | 0.975 |
| 157.                  | LP | (3)C149 | 806. | RY*(40)Ru52     | 0.06      | 54.19   | 0.052 |
| 157.                  | LP | (3)C149 | 807. | RY*(41)Ru52     | 0.29      | 81.24   | 0.146 |
| 157.                  | LP | (3)C149 | 808. | RY*(42)Ru52     | 0.10      | 2110.88 | 0.438 |
| 157.                  | LP | (3)C149 | 872. | BD*(1) C 4- O44 | 0.81      | 0.23    | 0.012 |
| 157.                  | LP | (3)C149 | 874. | BD*(3) C 4- O44 | 0.50      | 0.85    | 0.020 |
| 157.                  | LP | (3)C149 | 876. | BD*(1) C10-Ru52 | 0.50      | 0.36    | 0.012 |
| 157.                  | LP | (3)C149 | 877. | BD*(1) C10- O48 | 0.59      | 0.26    | 0.011 |
| 157.                  | LP | (3)C149 | 879. | BD*(3) C10- O48 | 0.40      | 0.81    | 0.017 |
| 157.                  | LP | (3)C149 | 885. | BD*(1) C 2- H27 | 0.07      | 0.61    | 0.006 |
| 157.                  | LP | (3)C149 | 886. | BD*(1) C 7- N50 | 0.18      | 0.66    | 0.010 |
| 157.                  | LP | (3)C149 | 894. | BD*(1) C11-Ru52 | 26.88     | 0.25    | 0.075 |
| 157.                  | LP | (3)C149 | 895. | BD*(1) C11- C15 | 0.06      | 0.75    | 0.006 |
| 158.                  | LP | (4)C149 | 326. | RY*(9) C11      | 0.07      | 13.21   | 0.029 |
| 158.                  | LP | (4)C149 | 331. | RY*(14) C11     | 0.05      | 40.54   | 0.045 |
| 158.                  | LP | (4)C149 | 332. | RY*(15) C11     | 0.07      | 27.26   | 0.041 |
| 158.                  | LP | (4)C149 | 767. | RY*(1)Ru52      | 0.31      | 7.21    | 0.045 |
| 158.                  | LP | (4)C149 | 778. | RY*(12)Ru52     | 0.10      | 6.31    | 0.024 |
| 158.                  | LP | (4)C149 | 781. | RY*(15)Ru52     | 0.27      | 7.95    | 0.045 |
| 158.                  | LP | (4)C149 | 782. | RY*(16)Ru52     | 0.19      | 6.80    | 0.035 |
| 158.                  | LP | (4)C149 | 783. | RY*(17)Ru52     | 0.10      | 12.88   | 0.034 |
| 158.                  | LP | (4)C149 | 789. | RY*(23)Ru52     | 0.07      | 10.84   | 0.026 |
| 158.                  | LP | (4)C149 | 796. | RY*(30)Ru52     | 0.05      | 19.00   | 0.030 |
| 158.                  | LP | (4)C149 | 797. | RY*(31)Ru52     | 0.13      | 19.44   | 0.048 |
| 158.                  | LP | (4)C149 | 798. | RY*(32)Ru52     | 0.07      | 54.26   | 0.060 |
| 158.                  | LP | (4)C149 | 805. | RY*(39)Ru52     | 0.06      | 17.68   | 0.032 |
| 158.                  | LP | (4)C149 | 872. | BD*(1) C 4- O44 | 0.29      | 0.40    | 0.010 |
| 158.                  | LP | (4)C149 | 874. | BD*(3) C 4- O44 | 0.14      | 1.01    | 0.011 |
| 158.                  | LP | (4)C149 | 875. | BD*(1) C 4-Ru52 | 0.98      | 0.51    | 0.020 |
| 158.                  | LP | (4)C149 | 876. | BD*(1) C10-Ru52 | 0.22      | 0.52    | 0.010 |
| 158.                  | LP | (4)C149 | 877. | BD*(1) C10- O48 | 0.25      | 0.42    | 0.009 |
| 158.                  | LP | (4)C149 | 878. | BD*(2) C10- O48 | 0.24      | 0.40    | 0.009 |
| 158.                  | LP | (4)C149 | 879. | BD*(3) C10- O48 | 0.27      | 0.98    | 0.016 |
| 158.                  | LP | (4)C149 | 881. | BD*(1) C 1- C 2 | 0.07      | 0.87    | 0.007 |
| 158.                  | LP | (4)C149 | 886. | BD*(1) C 7- N50 | 0.24      | 0.83    | 0.013 |
| 158.                  | LP | (4)C149 | 894. | BD*(1) C11-Ru52 | 27.58     | 0.41    | 0.096 |
| 158.                  | LP | (4)C149 | 895. | BD*(1) C11- C15 | 0.06      | 0.91    | 0.007 |
| 158.                  | LP | (4)C149 | 896. | BD*(2) C11- C15 | 0.09      | 0.42    | 0.006 |
| from unit 4 to unit 2 |    |         |      |                 |           |         |       |
| 104.                  | CR | (1)C149 | 926. | BD*(1) C16-Ru53 | 0.49      | 100.11  | 0.214 |
| 105.                  | CR | (2)C149 | 926. | BD*(1) C16-Ru53 | 3.87      | 10.23   | 0.193 |
| 107.                  | CR | (4)C149 | 926. | BD*(1) C16-Ru53 | 0.20      | 6.94    | 0.036 |
| 108.                  | CR | (5)C149 | 926. | BD*(1) C16-Ru53 | 0.16      | 6.94    | 0.032 |
| 155.                  | LP | (1)C149 | 815. | RY*(1)Ru53      | 0.18      | 7.69    | 0.033 |
| 155.                  | LP | (1)C149 | 822. | RY*(8)Ru53      | 0.06      | 5.34    | 0.016 |
| 155.                  | LP | (1)C149 | 828. | RY*(14)Ru53     | 0.11      | 9.37    | 0.028 |
| 155.                  | LP | (1)C149 | 829. | RY*(15)Ru53     | 0.16      | 7.85    | 0.031 |
| 155.                  | LP | (1)C149 | 830. | RY*(16)Ru53     | 0.15      | 7.16    | 0.030 |
| 155.                  | LP | (1)C149 | 836. | RY*(22)Ru53     | 0.07      | 11.29   | 0.025 |
| 155.                  | LP | (1)C149 | 838. | RY*(24)Ru53     | 0.0635647 | 5.4     | 1.287 |
| 155.                  | LP | (1)C149 | 839. | RY*(25)Ru53     | 0.07      | 5348.59 | 0.528 |
| 155.                  | LP | (1)C149 | 840. | RY*(26)Ru53     | 0.11      | 5744.21 | 0.709 |
| 155.                  | LP | (1)C149 | 844. | RY*(30)Ru53     | 0.05      | 33.14   | 0.038 |
| 155.                  | LP | (1)C149 | 847. | RY*(33)Ru53     | 0.09      | 278.24  | 0.140 |
| 155.                  | LP | (1)C149 | 852. | RY*(38)Ru53     | 0.10      | 356.41  | 0.171 |
| 155.                  | LP | (1)C149 | 853. | RY*(39)Ru53     | 0.06      | 18.63   | 0.031 |
| 155.                  | LP | (1)C149 | 856. | RY*(42)Ru53     | 0.09      | 3163.16 | 0.489 |
| 155.                  | LP | (1)C149 | 903. | BD*(1) C 6- O45 | 0.11      | 0.73    | 0.009 |
| 155.                  | LP | (1)C149 | 908. | BD*(1) C 8- O46 | 0.06      | 0.72    | 0.006 |
| 155.                  | LP | (1)C149 | 911. | BD*(1) C12- C14 | 0.11      | 1.19    | 0.010 |
| 155.                  | LP | (1)C149 | 921. | BD*(1) C20- N51 | 0.06      | 1.14    | 0.008 |
| 155.                  | LP | (1)C149 | 926. | BD*(1) C16-Ru53 | 8.91      | 0.73    | 0.078 |
| 156.                  | LP | (2)C149 | 568. | RY*(1) H29      | 0.12      | 1.76    | 0.013 |
| 156.                  | LP | (2)C149 | 816. | RY*(2)Ru53      | 0.09      | 2.08    | 0.012 |
| 156.                  | LP | (2)C149 | 829. | RY*(15)Ru53     | 0.15      | 7.37    | 0.029 |
| 156.                  | LP | (2)C149 | 830. | RY*(16)Ru53     | 0.08      | 6.67    | 0.021 |
| 156.                  | LP | (2)C149 | 906. | BD*(1) C 6-Ru53 | 0.25      | 0.36    | 0.009 |
| 156.                  | LP | (2)C149 | 911. | BD*(1) C12- C14 | 0.28      | 0.70    | 0.012 |
| 156.                  | LP | (2)C149 | 914. | BD*(1) C12- H29 | 1.90      | 0.61    | 0.030 |
| 156.                  | LP | (2)C149 | 921. | BD*(1) C20- N51 | 0.15      | 0.66    | 0.009 |
| 157.                  | LP | (3)C149 | 243. | RY*(1) C 6      | 0.15      | 2.08    | 0.017 |
| 157.                  | LP | (3)C149 | 249. | RY*(7) C 6      | 0.09      | 7.17    | 0.024 |
| 157.                  | LP | (3)C149 | 250. | RY*(8) C 6      | 0.12      | 3.24    | 0.019 |
| 157.                  | LP | (3)C149 | 252. | RY*(10) C 6     | 0.06      | 2.20    | 0.011 |
| 157.                  | LP | (3)C149 | 254. | RY*(12) C 6     | 0.08      | 2.78    | 0.014 |
| 157.                  | LP | (3)C149 | 273. | RY*(1) C 8      | 0.40      | 1.98    | 0.027 |
| 157.                  | LP | (3)C149 | 275. | RY*(3) C 8      | 0.07      | 2.02    | 0.011 |
| 157.                  | LP | (3)C149 | 276. | RY*(4) C 8      | 0.17      | 2.46    | 0.020 |
| 157.                  | LP | (3)C149 | 278. | RY*(6) C 8      | 0.09      | 2.29    | 0.014 |
| 157.                  | LP | (3)C149 | 279. | RY*(7) C 8      | 0.57      | 6.83    | 0.059 |
| 157.                  | LP | (3)C149 | 340. | RY*(8) C12      | 0.14      | 9.72    | 0.035 |
| 157.                  | LP | (3)C149 | 364. | RY*(2) C14      | 0.08      | 0.80    | 0.007 |
| 157.                  | LP | (3)C149 | 371. | RY*(9) C14      | 0.05      | 3.37    | 0.013 |
| 157.                  | LP | (3)C149 | 396. | RY*(4) C16      | 0.22      | 2.41    | 0.022 |
| 157.                  | LP | (3)C149 | 397. | RY*(5) C16      | 0.10      | 2.75    | 0.016 |
| 157.                  | LP | (3)C149 | 398. | RY*(6) C16      | 0.05      | 2.87    | 0.012 |
| 157.                  | LP | (3)C149 | 399. | RY*(7) C16      | 0.15      | 4.84    | 0.025 |
| 157.                  | LP | (3)C149 | 401. | RY*(9) C16      | 0.23      | 13.13   | 0.053 |
| 157.                  | LP | (3)C149 | 403. | RY*(11) C16     | 0.05      | 3.31    | 0.013 |
| 157.                  | LP | (3)C149 | 406. | RY*(14) C16     | 0.13      | 26.48   | 0.057 |
| 157.                  | LP | (3)C149 | 407. | RY*(15) C16     | 0.07      | 40.26   | 0.049 |
| 157.                  | LP | (3)C149 | 426. | RY*(4) C18      | 0.06      | 1.26    | 0.008 |
| 157.                  | LP | (3)C149 | 428. | RY*(6) C18      | 0.42      | 3.24    | 0.035 |
| 157.                  | LP | (3)C149 | 429. | RY*(7) C18      | 0.07      | 8.18    | 0.023 |
| 157.                  | LP | (3)C149 | 453. | RY*(1) C20      | 0.12      | 1.79    | 0.014 |
| 157.                  | LP | (3)C149 | 458. | RY*(6) C20      | 0.05      | 3.11    | 0.012 |
| 157.                  | LP | (3)C149 | 459. | RY*(7) C20      | 0.05      | 3.34    | 0.012 |
| 157.                  | LP | (3)C149 | 460. | RY*(8) C20      | 0.06      | 5.49    | 0.018 |
| 157.                  | LP | (3)C149 | 485. | RY*(3) C22      | 0.10      | 2.03    | 0.014 |
| 157.                  | LP | (3)C149 | 487. | RY*(5) C22      | 0.18      | 4.21    | 0.026 |
| 157.                  | LP | (3)C149 | 570. | RY*(3) H29      | 0.45      | 1.39    | 0.024 |
| 157.                  | LP | (3)C149 | 571. | RY*(4) H29      | 0.10      | 2.09    | 0.014 |
| 157.                  | LP | (3)C149 | 610. | RY*(3) H37      | 0.06      | 1.37    | 0.009 |
| 157.                  | LP | (3)C149 | 625. | RY*(3) H40      | 0.05      | 1.60    | 0.009 |
| 157.                  | LP | (3)C149 | 661. | RY*(4) O45      | 0.35      | 0.86    | 0.016 |
| 157.                  | LP | (3)C149 | 662. | RY*(5) O45      | 0.16      | 2.42    | 0.018 |
| 157.                  | LP | (3)C149 | 675. | RY*(3) O46      | 0.06      | 1.97    | 0.010 |
| 157.                  | LP | (3)C149 | 676. | RY*(4) O46      | 0.13      | 0.96    | 0.011 |

|                       |                       |              |         |       |
|-----------------------|-----------------------|--------------|---------|-------|
| 157. LP ( 3)C149      | 679. RY*( 7) O46      | 0.14         | 2.28    | 0.017 |
| 157. LP ( 3)C149      | 752. RY*( 1) N51      | 0.13         | 2.04    | 0.015 |
| 157. LP ( 3)C149      | 760. RY*( 9) N51      | 0.11         | 4.82    | 0.022 |
| 157. LP ( 3)C149      | 815. RY*( 1)Ru53      | 2.52         | 7.21    | 0.128 |
| 157. LP ( 3)C149      | 816. RY*( 2)Ru53      | 0.90         | 2.08    | 0.041 |
| 157. LP ( 3)C149      | 818. RY*( 4)Ru53      | 0.56         | 2.45    | 0.035 |
| 157. LP ( 3)C149      | 819. RY*( 5)Ru53      | 1.26         | 6.67    | 0.087 |
| 157. LP ( 3)C149      | 820. RY*( 6)Ru53      | 0.13         | 3.76    | 0.021 |
| 157. LP ( 3)C149      | 822. RY*( 8)Ru53      | 0.86         | 4.86    | 0.061 |
| 157. LP ( 3)C149      | 823. RY*( 9)Ru53      | 2.02         | 9.32    | 0.130 |
| 157. LP ( 3)C149      | 824. RY*(10)Ru53      | 1.22         | 7.29    | 0.089 |
| 157. LP ( 3)C149      | 825. RY*(11)Ru53      | 0.50         | 6.23    | 0.053 |
| 157. LP ( 3)C149      | 827. RY*(13)Ru53      | 0.90         | 13.99   | 0.107 |
| 157. LP ( 3)C149      | 828. RY*(14)Ru53      | 0.75         | 8.88    | 0.078 |
| 157. LP ( 3)C149      | 829. RY*(15)Ru53      | 0.99         | 7.37    | 0.081 |
| 157. LP ( 3)C149      | 830. RY*(16)Ru53      | 0.55         | 6.67    | 0.058 |
| 157. LP ( 3)C149      | 831. RY*(17)Ru53      | 0.51         | 12.66   | 0.076 |
| 157. LP ( 3)C149      | 832. RY*(18)Ru53      | 0.15         | 5.46    | 0.027 |
| 157. LP ( 3)C149      | 835. RY*(21)Ru53      | 0.28         | 12.56   | 0.056 |
| 157. LP ( 3)C149      | 836. RY*(22)Ru53      | 2.30         | 10.81   | 0.150 |
| 157. LP ( 3)C149      | 837. RY*(23)Ru53      | 0.10         | 8.77    | 0.029 |
| 157. LP ( 3)C149      | 838. RY*(24)Ru53      | 1.5935647.06 |         | 7.156 |
| 157. LP ( 3)C149      | 839. RY*(25)Ru53      | 1.71         | 5348.10 | 2.871 |
| 157. LP ( 3)C149      | 840. RY*(26)Ru53      | 3.06         | 5743.72 | 3.980 |
| 157. LP ( 3)C149      | 841. RY*(27)Ru53      | 0.10         | 49.51   | 0.066 |
| 157. LP ( 3)C149      | 842. RY*(28)Ru53      | 0.06         | 186.34  | 0.102 |
| 157. LP ( 3)C149      | 843. RY*(29)Ru53      | 0.88         | 10.37   | 0.091 |
| 157. LP ( 3)C149      | 844. RY*(30)Ru53      | 1.77         | 32.66   | 0.228 |
| 157. LP ( 3)C149      | 847. RY*(33)Ru53      | 2.63         | 277.76  | 0.812 |
| 157. LP ( 3)C149      | 852. RY*(38)Ru53      | 2.91         | 355.92  | 0.967 |
| 157. LP ( 3)C149      | 855. RY*(41)Ru53      | 1.21         | 140.87  | 0.392 |
| 157. LP ( 3)C149      | 856. RY*(42)Ru53      | 2.49         | 3162.68 | 2.667 |
| 157. LP ( 3)C149      | 861. RY*(47)Ru53      | 0.07         | 19.28   | 0.036 |
| 157. LP ( 3)C149      | 862. RY*(48)Ru53      | 0.06         | 54.12   | 0.053 |
| 157. LP ( 3)C149      | 903. BD*( 1) C 6- O45 | 0.40         | 0.25    | 0.009 |
| 157. LP ( 3)C149      | 905. BD*( 3) C 6- O45 | 0.20         | 0.82    | 0.012 |
| 157. LP ( 3)C149      | 906. BD*( 1) C 6-Ru53 | 0.28         | 0.36    | 0.009 |
| 157. LP ( 3)C149      | 908. BD*( 1) C 8- O46 | 0.39         | 0.23    | 0.009 |
| 157. LP ( 3)C149      | 909. BD*( 2) C 8- O46 | 0.12         | 0.23    | 0.005 |
| 157. LP ( 3)C149      | 910. BD*( 3) C 8- O46 | 0.33         | 0.85    | 0.016 |
| 157. LP ( 3)C149      | 914. BD*( 1) C12- H29 | 0.06         | 0.61    | 0.006 |
| 157. LP ( 3)C149      | 921. BD*( 1) C20- N51 | 0.11         | 0.66    | 0.008 |
| 157. LP ( 3)C149      | 926. BD*( 1) C16-Ru53 | 14.42        | 0.25    | 0.054 |
| 158. LP ( 4)C149      | 167. LP*( 1) C16      | 0.16         | 0.31    | 0.008 |
| 158. LP ( 4)C149      | 401. RY*( 9) C16      | 0.12         | 13.29   | 0.038 |
| 158. LP ( 4)C149      | 406. RY*(14) C16      | 0.11         | 26.64   | 0.052 |
| 158. LP ( 4)C149      | 407. RY*(15) C16      | 0.09         | 40.42   | 0.057 |
| 158. LP ( 4)C149      | 815. RY*( 1)Ru53      | 0.51         | 7.37    | 0.058 |
| 158. LP ( 4)C149      | 817. RY*( 3)Ru53      | 0.18         | 1.53    | 0.016 |
| 158. LP ( 4)C149      | 818. RY*( 4)Ru53      | 0.08         | 2.62    | 0.014 |
| 158. LP ( 4)C149      | 822. RY*( 8)Ru53      | 0.09         | 5.02    | 0.021 |
| 158. LP ( 4)C149      | 826. RY*(12)Ru53      | 0.09         | 3.30    | 0.016 |
| 158. LP ( 4)C149      | 827. RY*(13)Ru53      | 0.07         | 14.15   | 0.031 |
| 158. LP ( 4)C149      | 829. RY*(15)Ru53      | 0.36         | 7.53    | 0.050 |
| 158. LP ( 4)C149      | 830. RY*(16)Ru53      | 0.41         | 6.84    | 0.051 |
| 158. LP ( 4)C149      | 836. RY*(22)Ru53      | 0.11         | 10.97   | 0.034 |
| 158. LP ( 4)C149      | 838. RY*(24)Ru53      | 0.1635647.22 |         | 2.304 |
| 158. LP ( 4)C149      | 839. RY*(25)Ru53      | 0.14         | 5348.27 | 0.819 |
| 158. LP ( 4)C149      | 840. RY*(26)Ru53      | 0.28         | 5743.89 | 1.220 |
| 158. LP ( 4)C149      | 843. RY*(29)Ru53      | 0.06         | 10.53   | 0.025 |
| 158. LP ( 4)C149      | 847. RY*(33)Ru53      | 0.18         | 277.92  | 0.214 |
| 158. LP ( 4)C149      | 852. RY*(38)Ru53      | 0.24         | 356.09  | 0.280 |
| 158. LP ( 4)C149      | 853. RY*(39)Ru53      | 0.24         | 18.31   | 0.064 |
| 158. LP ( 4)C149      | 854. RY*(40)Ru53      | 0.14         | 54.25   | 0.084 |
| 158. LP ( 4)C149      | 855. RY*(41)Ru53      | 0.13         | 141.03  | 0.129 |
| 158. LP ( 4)C149      | 856. RY*(42)Ru53      | 0.24         | 3162.84 | 0.837 |
| 158. LP ( 4)C149      | 857. RY*(43)Ru53      | 0.09         | 19.32   | 0.039 |
| 158. LP ( 4)C149      | 903. BD*( 1) C 6- O45 | 0.51         | 0.41    | 0.013 |
| 158. LP ( 4)C149      | 904. BD*( 2) C 6- O45 | 0.14         | 0.40    | 0.007 |
| 158. LP ( 4)C149      | 905. BD*( 3) C 6- O45 | 0.34         | 0.99    | 0.017 |
| 158. LP ( 4)C149      | 906. BD*( 1) C 6-Ru53 | 0.35         | 0.52    | 0.012 |
| 158. LP ( 4)C149      | 907. BD*( 1) C 8-Ru53 | 1.09         | 0.52    | 0.021 |
| 158. LP ( 4)C149      | 908. BD*( 1) C 8- O46 | 0.34         | 0.39    | 0.010 |
| 158. LP ( 4)C149      | 909. BD*( 2) C 8- O46 | 0.06         | 0.39    | 0.005 |
| 158. LP ( 4)C149      | 910. BD*( 3) C 8- O46 | 0.22         | 1.01    | 0.014 |
| 158. LP ( 4)C149      | 911. BD*( 1) C12- C14 | 0.10         | 0.86    | 0.009 |
| 158. LP ( 4)C149      | 921. BD*( 1) C20- N51 | 0.33         | 0.82    | 0.016 |
| 158. LP ( 4)C149      | 926. BD*( 1) C16-Ru53 | 35.12        | 0.41    | 0.108 |
| 158. LP ( 4)C149      | 928. BD*( 1) C16- C18 | 0.08         | 0.91    | 0.008 |
| from unit 4 to unit 3 |                       |              |         |       |
| 157. LP ( 3)C149      | 638. RY*( 1) H43      | 0.33         | 1.49    | 0.021 |
| 157. LP ( 3)C149      | 641. RY*( 4) H43      | 0.38         | 2.38    | 0.029 |
| 157. LP ( 3)C149      | 688. RY*( 1) O47      | 0.06         | 1.94    | 0.010 |
| 157. LP ( 3)C149      | 690. RY*( 3) O47      | 0.07         | 2.79    | 0.013 |
| 157. LP ( 3)C149      | 692. RY*( 5) O47      | 0.83         | 2.67    | 0.045 |
| 157. LP ( 3)C149      | 698. RY*(11) O47      | 0.08         | 4.83    | 0.019 |
| 157. LP ( 3)C149      | 699. RY*(12) O47      | 0.05         | 4.77    | 0.015 |
| 157. LP ( 3)C149      | 700. RY*(13) O47      | 0.07         | 4.41    | 0.016 |
| 158. LP ( 4)C149      | 934. BD*( 1) H43- O47 | 0.09         | 0.85    | 0.008 |
| within unit 4         |                       |              |         |       |
| 157. LP ( 3)C149      | 720. RY*( 3)C149      | 8.16         | 2.13    | 0.125 |
| 158. LP ( 4)C149      | 723. RY*( 6)C149      | 1.13         | 3.44    | 0.060 |
| 158. LP ( 4)C149      | 725. RY*( 8)C149      | 0.97         | 5.65    | 0.071 |
| 158. LP ( 4)C149      | 727. RY*(10)C149      | 0.62         | 3.91    | 0.047 |
| 158. LP ( 4)C149      | 732. RY*(15)C149      | 0.54         | 26.42   | 0.114 |
| 158. LP ( 4)C149      | 735. RY*(18)C149      | 0.53         | 41.00   | 0.141 |

(3) Analytical Frequencies

=====  
 === CALCULATE ANALYTICAL SECOND DERIVATIVES OF THE ENERGY ===  
 =====

-----  
 This Analytical Second Derivatives Program  
 was written for ADF by

Stephen K. Wolff





Electronic Supplementary Information for Dalton Transactions  
This journal is © The Royal Society of Chemistry 2009

47. H 1.00782500  
48. C 12.00000000  
49. H 1.00782500  
50. H 1.00782500  
51. H 1.00782500  
52. H 1.00782500  
53. H 1.00782500

List of All Frequencies:

Intensities  
=====

| Frequency<br>cm-1 | Dipole Strength<br>1e-40 esu2 cm2 | Absorption<br>km/mole | Intensity (degeneracy not counted) |
|-------------------|-----------------------------------|-----------------------|------------------------------------|
| 20.839274         | 151.359926                        | 0.790627              |                                    |
| 23.876753         | 23.594531                         | 0.141210              |                                    |
| 30.758388         | 158.155115                        | 1.219340              |                                    |
| 34.583377         | 10.130875                         | 0.087820              |                                    |
| 41.674115         | 6.094410                          | 0.063661              |                                    |
| 59.217620         | 1.773600                          | 0.026326              |                                    |
| 60.720663         | 1.513349                          | 0.023033              |                                    |
| 66.758289         | 5.578553                          | 0.093348              |                                    |
| 75.712172         | 1.263282                          | 0.023974              |                                    |
| 84.088910         | 33.412740                         | 0.704253              |                                    |
| 84.661933         | 38.347641                         | 0.813776              |                                    |
| 87.493418         | 6.772418                          | 0.148524              |                                    |
| 90.867337         | 19.291553                         | 0.439393              |                                    |
| 93.159736         | 16.073810                         | 0.375340              |                                    |
| 97.658980         | 49.147368                         | 1.203069              |                                    |
| 116.097538        | 27.403538                         | 0.797458              |                                    |
| 116.854650        | 1.838064                          | 0.053837              |                                    |
| 125.555344        | 1.377887                          | 0.043364              |                                    |
| 142.552929        | 72.737798                         | 2.599048              |                                    |
| 168.836756        | 5.806893                          | 0.245747              |                                    |
| 183.520403        | 45.059731                         | 2.072770              |                                    |
| 187.727870        | 125.097964                        | 5.886499              |                                    |
| 189.994830        | 39.047014                         | 1.859549              |                                    |
| 191.479947        | 234.657240                        | 11.262514             |                                    |
| 210.148877        | 155.872135                        | 8.210576              |                                    |
| 225.247810        | 18.281526                         | 1.032170              |                                    |
| 249.766503        | 104.476000                        | 6.540769              |                                    |
| 252.161902        | 56.006212                         | 3.539922              |                                    |
| 259.946908        | 7.481246                          | 0.487457              |                                    |
| 266.263737        | 5.347589                          | 0.356901              |                                    |
| 282.857557        | 51.005030                         | 3.616253              |                                    |
| 285.358174        | 40.926244                         | 2.927320              |                                    |
| 347.582798        | 147.112416                        | 12.816979             |                                    |
| 365.160739        | 29.142749                         | 2.667428              |                                    |
| 366.088872        | 33.768117                         | 3.098642              |                                    |
| 413.449119        | 27.088315                         | 2.807257              |                                    |
| 414.304965        | 61.164786                         | 6.351842              |                                    |
| 424.929248        | 5.103759                          | 0.543607              |                                    |
| 425.522277        | 24.688125                         | 2.633228              |                                    |
| 450.708643        | 59.360433                         | 6.706115              |                                    |
| 461.379988        | 515.976025                        | 59.671416             |                                    |
| 465.814611        | 23.549736                         | 2.749649              |                                    |
| 467.595645        | 110.177614                        | 12.913438             |                                    |
| 470.441732        | 23.133935                         | 2.727931              |                                    |
| 478.313802        | 18.213655                         | 2.183675              |                                    |
| 483.722778        | 47.123761                         | 5.713662              |                                    |
| 488.746966        | 136.146055                        | 16.678892             |                                    |
| 508.911546        | 17.761634                         | 2.265705              |                                    |
| 511.323752        | 8.662587                          | 1.110252              |                                    |
| 527.127864        | 160.711336                        | 21.234428             |                                    |
| 531.516980        | 63.713786                         | 8.488455              |                                    |
| 547.446212        | 39.456629                         | 5.414265              |                                    |
| 549.005997        | 8.971641                          | 1.234602              |                                    |
| 556.421974        | 14.134162                         | 1.971299              |                                    |
| 558.804730        | 0.844948                          | 0.118350              |                                    |
| 598.119194        | 52.542589                         | 7.877298              |                                    |
| 605.487246        | 121.308238                        | 18.430830             |                                    |
| 626.660681        | 33.235099                         | 5.220445              |                                    |
| 626.980836        | 45.613414                         | 7.168444              |                                    |
| 636.884675        | 76.939875                         | 12.282601             |                                    |
| 638.088129        | 96.491965                         | 15.432983             |                                    |
| 643.340784        | 18.128614                         | 2.923370              |                                    |
| 644.378636        | 24.401183                         | 3.941215              |                                    |
| 660.692654        | 10.806683                         | 1.789658              |                                    |
| 661.787726        | 15.961060                         | 2.647637              |                                    |
| 714.113512        | 25.058709                         | 4.485429              |                                    |
| 714.484705        | 11.022762                         | 1.974065              |                                    |
| 722.782500        | 173.606628                        | 31.452270             |                                    |
| 723.017755        | 92.707299                         | 16.801226             |                                    |
| 740.891992        | 523.417657                        | 97.203374             |                                    |
| 741.245948        | 165.553426                        | 30.759451             |                                    |
| 756.634334        | 2.818596                          | 0.534561              |                                    |
| 756.770075        | 2.850659                          | 0.540738              |                                    |
| 782.616623        | 6.554664                          | 1.285812              |                                    |
| 782.738313        | 21.069110                         | 4.133718              |                                    |
| 842.374829        | 2.720766                          | 0.574480              |                                    |
| 843.222279        | 4.397367                          | 0.929422              |                                    |
| 862.353739        | 6.953723                          | 1.503076              |                                    |
| 862.451185        | 1.434141                          | 0.330031              |                                    |
| 914.403675        | 196.428645                        | 45.021593             |                                    |
| 920.136878        | 3.991119                          | 0.920503              |                                    |
| 920.604580        | 0.091742                          | 0.021170              |                                    |
| 958.661633        | 4.318336                          | 1.037671              |                                    |
| 960.181966        | 3.818128                          | 0.918929              |                                    |
| 960.662868        | 3.411060                          | 0.821259              |                                    |
| 962.312099        | 2.603723                          | 0.628042              |                                    |
| 974.428099        | 2.642529                          | 0.645428              |                                    |
| 975.135424        | 1.509105                          | 0.368861              |                                    |
| 1000.645668       | 15.796226                         | 3.961975              |                                    |
| 1001.932197       | 13.972826                         | 3.509140              |                                    |
| 1008.212140       | 109.537282                        | 27.681649             |                                    |
| 1008.680842       | 113.756141                        | 28.761180             |                                    |
| 1017.874651       | 19.444363                         | 4.960964              |                                    |
| 1018.993698       | 22.527760                         | 5.753970              |                                    |
| 1046.931287       | 7.253722                          | 1.903519              |                                    |
| 1047.501809       | 3.202254                          | 0.840792              |                                    |
| 1053.971117       | 76.516751                         | 20.214514             |                                    |

|             |             |            |
|-------------|-------------|------------|
| 1054.309066 | 21.891476   | 5.785236   |
| 1098.509537 | 5.353221    | 1.473999   |
| 1098.834886 | 5.263543    | 1.449735   |
| 1116.949120 | 2.117258    | 0.592769   |
| 1117.835882 | 2.149417    | 0.602250   |
| 1151.325576 | 12.540440   | 3.619004   |
| 1151.825152 | 14.301587   | 4.129038   |
| 1158.549743 | 24.132012   | 7.007874   |
| 1158.623150 | 14.277488   | 4.146408   |
| 1235.732837 | 16.459858   | 5.098339   |
| 1236.696576 | 21.609687   | 6.698687   |
| 1270.473590 | 86.356300   | 27.500320  |
| 1272.035574 | 33.023315   | 10.529263  |
| 1284.747355 | 4.291431    | 1.381968   |
| 1286.070746 | 4.753503    | 1.532346   |
| 1299.660493 | 54.254864   | 17.674481  |
| 1299.995053 | 29.999489   | 9.775379   |
| 1312.890062 | 4.795634    | 1.578165   |
| 1313.150629 | 8.092158    | 2.663526   |
| 1412.260996 | 51.059745   | 18.074724  |
| 1412.583933 | 75.808265   | 26.841630  |
| 1427.619424 | 8.685866    | 3.108162   |
| 1427.868109 | 13.062329   | 4.675056   |
| 1442.748416 | 29.839800   | 10.791072  |
| 1443.771383 | 20.517482   | 7.425070   |
| 1467.811833 | 197.125791  | 72.525696  |
| 1469.107942 | 165.640084  | 60.995419  |
| 1540.512305 | 23.969639   | 9.255603   |
| 1541.849356 | 23.760712   | 9.182892   |
| 1555.432860 | 67.028310   | 26.132900  |
| 1556.618691 | 79.834610   | 31.149532  |
| 1570.104101 | 90.615831   | 35.662402  |
| 1571.525071 | 112.875989  | 44.463224  |
| 1593.180672 | 153.284928  | 61.212844  |
| 1593.524587 | 88.370167   | 35.297384  |
| 1933.150912 | 1121.230843 | 543.298949 |
| 1937.419903 | 1514.255977 | 735.361898 |
| 1995.885194 | 1890.349968 | 945.705339 |
| 1999.950190 | 897.251630  | 449.791771 |
| 3082.634649 | 1.677293    | 1.296012   |
| 3083.694263 | 1.656892    | 1.280689   |
| 3091.884412 | 8.362062    | 6.480592   |
| 3091.919601 | 11.784616   | 9.133173   |
| 3100.725232 | 25.703542   | 19.977186  |
| 3101.356726 | 14.465106   | 11.244791  |
| 3104.968367 | 7.182775    | 5.590202   |
| 3105.728437 | 13.340119   | 10.384875  |
| 3105.899246 | 2.106759    | 1.640138   |
| 3106.961040 | 11.075122   | 8.625066   |
| 3117.144297 | 39.188288   | 30.619019  |
| 3117.853556 | 40.438793   | 31.603266  |
| 3130.376920 | 3.386417    | 2.657144   |
| 3131.734300 | 2.736987    | 2.148502   |
| 3135.767003 | 9.035771    | 7.102104   |
| 3137.239403 | 7.517094    | 5.911201   |
| 3660.841677 | 29.066365   | 26.671641  |

=====  
Statistical Thermal Analysis \*\*\* ideal gas assumed \*\*\*  
=====

Pressure: 1.000000 atm.  
Temperature: 298.150000 K

Moments of Inertia (and direction vectors)  
=====

|            |            |            |
|------------|------------|------------|
| 14042.1321 | 22703.2328 | 24687.7366 |
| -----      |            |            |
| -0.5979    | 0.6127     | 0.5168     |
| -0.7205    | -0.6934    | -0.0115    |
| 0.3513     | -0.3792    | 0.8560     |

The rotational contribution to the molecular entropy includes a term, dependent on the symmetry number sigma. The results reported below were computed using sigma = 1, determined from the point group symmetry of the input geometry (NOSYM). If this is not the correct symmetry, please contact SCM to report a bug.

| Temp   |                                             | Transl | Rotat  | Vibrat  | Total   |
|--------|---------------------------------------------|--------|--------|---------|---------|
| ----   |                                             | -----  | -----  | -----   | -----   |
| 298.15 | Entropy (cal/mole-K):                       | 45.414 | 37.307 | 133.240 | 215.961 |
|        | Internal Energy (Kcal/mole):                | 0.889  | 0.889  | 245.996 | 247.774 |
|        | Constant Volume Heat Capacity (cal/mole-K): | 2.981  | 2.981  | 122.539 | 128.500 |

\*\*\*\*\*

=====  
\*\*\* DONE CALCULATING ANALYTICAL SECOND DERIVATIVES OF THE ENERGY \*\*\*  
=====

=====  
SCAN POTENTIAL ENERGY SURFACE ALONG A RANGE OF NORMAL MODES \*\*\* with IR intensities \*\*\*  
=====

RANGE OF FREQUENCIES: from -1000.000 to 0.000

=====  
Vibration symmetry: \*\*\* A \*\*\*  
=====

Electronic Supplementary Information for Dalton Transactions  
This journal is © The Royal Society of Chemistry 2009

Total number of frequencies of this symmetry: 153  
Frequencies,  $\text{cm}^{-1}$ :

|          |          |          |          |          |          |          |          |
|----------|----------|----------|----------|----------|----------|----------|----------|
| 20.839   | 23.877   | 30.758   | 34.583   | 41.674   | 59.218   | 60.721   | 66.758   |
| 75.712   | 84.089   | 84.662   | 87.493   | 90.867   | 93.160   | 97.659   | 116.098  |
| 116.855  | 125.555  | 142.553  | 168.837  | 183.520  | 187.728  | 189.995  | 191.480  |
| 210.149  | 225.248  | 249.767  | 252.162  | 259.947  | 266.264  | 282.858  | 285.358  |
| 347.583  | 365.161  | 366.089  | 413.449  | 414.305  | 424.929  | 425.522  | 450.709  |
| 461.380  | 465.815  | 467.596  | 470.442  | 478.314  | 483.723  | 488.747  | 508.912  |
| 511.324  | 527.128  | 531.517  | 547.446  | 549.006  | 556.422  | 558.805  | 598.119  |
| 605.487  | 626.661  | 626.981  | 636.885  | 638.088  | 643.341  | 644.379  | 660.693  |
| 661.788  | 714.114  | 714.485  | 722.783  | 723.018  | 740.892  | 741.246  | 756.634  |
| 756.770  | 782.617  | 782.738  | 842.375  | 843.222  | 862.354  | 862.451  | 914.404  |
| 920.137  | 920.605  | 958.662  | 960.182  | 960.663  | 962.312  | 974.428  | 975.135  |
| 1000.646 | 1001.932 | 1008.212 | 1008.681 | 1017.875 | 1018.994 | 1046.931 | 1047.502 |
| 1053.971 | 1054.309 | 1098.510 | 1098.835 | 1116.949 | 1117.836 | 1151.326 | 1151.825 |
| 1158.550 | 1158.623 | 1235.733 | 1236.697 | 1270.474 | 1272.036 | 1284.747 | 1286.071 |
| 1299.660 | 1299.995 | 1312.890 | 1313.151 | 1412.261 | 1412.584 | 1427.619 | 1427.868 |
| 1442.748 | 1443.771 | 1467.812 | 1469.108 | 1540.512 | 1541.849 | 1555.433 | 1556.619 |
| 1570.104 | 1571.525 | 1593.181 | 1593.525 | 1933.151 | 1937.420 | 1995.885 | 1999.950 |
| 3082.635 | 3083.694 | 3091.884 | 3091.920 | 3100.725 | 3101.357 | 3104.968 | 3105.728 |
| 3105.899 | 3106.961 | 3117.144 | 3117.854 | 3130.377 | 3131.734 | 3135.767 | 3137.239 |
| 3660.842 |          |          |          |          |          |          |          |

Number of frequencies in the requested range: 0



\*\*\*\*\*  
Geometry CONVERGED  
\*\*\*\*\*

\*\*\*\*\*  
\* Final Geometry \*  
\*\*\*\*\*

Coordinates (Cartesian)  
=====

| Atom  | bohr      |           |            | angstrom  |           |           | Geometric Variables<br>(0:frozen, *:LT par.) |     |     |
|-------|-----------|-----------|------------|-----------|-----------|-----------|----------------------------------------------|-----|-----|
|       | X         | Y         | Z          | X         | Y         | Z         |                                              |     |     |
| 1 C   | 6.619659  | -1.713833 | -6.443456  | 3.502973  | -0.906921 | -3.409730 | 1                                            | 2   | 3   |
| 2 H   | 5.444274  | -0.671788 | -2.642710  | 2.880986  | -0.355495 | -1.398462 | 4                                            | 5   | 6   |
| 3 C   | 5.160235  | -0.439159 | -4.669721  | 2.730679  | -0.232393 | -2.471110 | 7                                            | 8   | 9   |
| 4 C   | 6.101893  | -1.329048 | -9.005793  | 3.228983  | -0.703302 | -4.765660 | 10                                           | 11  | 12  |
| 5 Cl  | 2.299019  | 0.465714  | 1.051626   | 1.216588  | 0.246445  | 0.556497  | 13                                           | 14  | 15  |
| 6 N   | 3.277647  | 1.145757  | -5.331339  | 1.734456  | 0.606308  | -2.821223 | 16                                           | 17  | 18  |
| 7 O   | 3.340096  | -6.116458 | -2.553502  | 1.767502  | -3.236690 | -1.351255 | 19                                           | 20  | 21  |
| 8 C   | 4.182702  | 0.325309  | -9.695679  | 2.213390  | 0.172146  | -5.130732 | 22                                           | 23  | 24  |
| 9 O   | -4.483356 | -6.999124 | -1.797187  | -2.372490 | -3.703777 | -0.951030 | 25                                           | 26  | 27  |
| 10 H  | 3.769851  | 0.662091  | -11.681317 | 1.994919  | 0.350364  | -6.181487 | 28                                           | 29  | 30  |
| 11 C  | 1.769982  | -4.797559 | -1.739162  | 0.936634  | -2.538759 | -0.920325 | 31                                           | 32  | 33  |
| 12 C  | 2.776091  | 1.585995  | -7.827817  | 1.469044  | 0.839272  | -4.142302 | 34                                           | 35  | 36  |
| 13 C  | -3.097271 | -5.415860 | -1.152095  | -1.639005 | -2.865950 | -0.609662 | 37                                           | 38  | 39  |
| 14 Ru | 0.878654  | 3.185242  | -2.719874  | 0.464964  | 1.685558  | -1.439296 | 40                                           | 41  | 42  |
| 15 H  | -5.151633 | 0.982447  | -0.696890  | -2.726127 | 0.519889  | -0.368778 | 43                                           | 44  | 45  |
| 16 Ru | -0.795220 | -2.941152 | -0.162740  | -0.420812 | -1.556391 | -0.086118 | 46                                           | 47  | 48  |
| 17 C  | 0.782720  | 3.439429  | -8.301549  | 0.414198  | 1.820067  | -4.392991 | 49                                           | 50  | 51  |
| 18 C  | -1.393117 | 5.170025  | -0.861411  | -0.737206 | 2.735859  | -0.455839 | 52                                           | 53  | 54  |
| 19 C  | -0.345445 | 4.587157  | -6.145501  | -0.182801 | 2.427419  | -3.252059 | 55                                           | 56  | 57  |
| 20 C  | -5.306091 | 0.548887  | 1.311746   | -2.807862 | 0.288342  | 0.694146  | 58                                           | 59  | 60  |
| 21 H  | 0.913809  | 3.254574  | -12.405846 | 0.483567  | 1.722247  | -6.564891 | 61                                           | 62  | 63  |
| 22 H  | -8.448142 | 2.992444  | 2.123993   | -4.470564 | 1.583533  | 1.123969  | 64                                           | 65  | 66  |
| 23 C  | 0.042346  | 4.142653  | -10.762944 | 0.022409  | 2.192197  | -5.695505 | 67                                           | 68  | 69  |
| 24 O  | -2.792132 | 6.530980  | 0.159274   | -1.477533 | 3.456046  | 0.084284  | 70                                           | 71  | 72  |
| 25 N  | -3.593029 | -1.132582 | 2.168914   | -1.901349 | -0.599337 | 1.147740  | 73                                           | 74  | 75  |
| 26 H  | 2.701803  | -7.484451 | 2.376555   | 1.429733  | -3.960601 | 1.257619  | 76                                           | 77  | 78  |
| 27 C  | -7.100451 | 1.638170  | 2.887783   | -3.757397 | 0.866882  | 1.528149  | 79                                           | 80  | 81  |
| 28 C  | -2.187523 | 6.456595  | -6.576765  | -1.157587 | 3.416683  | -3.480274 | 82                                           | 83  | 84  |
| 29 H  | 3.081567  | 7.413704  | -4.986133  | -1.630695 | 3.923163  | -2.638548 | 85                                           | 86  | 87  |
| 30 C  | -0.212954 | -4.743671 | 3.275486   | -0.112690 | -2.510243 | 1.733312  | 88                                           | 89  | 90  |
| 31 C  | -1.791537 | 5.989752  | -11.129820 | -0.948041 | 3.169640  | -5.889647 | 91                                           | 92  | 93  |
| 32 C  | 1.532851  | -6.659268 | 3.859620   | 0.811150  | -3.523933 | 2.042423  | 94                                           | 95  | 96  |
| 33 C  | -2.901700 | 7.150304  | -9.024206  | -1.535513 | 3.783778  | -4.775404 | 97                                           | 98  | 99  |
| 34 H  | -2.345069 | 6.536954  | -13.037328 | -1.240957 | 3.459207  | -6.899057 | 100                                          | 101 | 102 |
| 35 C  | -3.582958 | -1.849136 | 4.646317   | -1.896020 | -0.978521 | 2.458725  | 103                                          | 104 | 105 |
| 36 C  | -7.102858 | 0.963896  | 5.443864   | -3.758671 | 0.510072  | 2.880769  | 106                                          | 107 | 108 |
| 37 H  | -4.327831 | 8.616850  | -9.291813  | -2.290190 | 4.559841  | -4.917015 | 109                                          | 110 | 111 |
| 38 C  | -1.707380 | -3.771662 | 5.289510   | -0.903507 | -1.995878 | 2.799088  | 112                                          | 113 | 114 |
| 39 C  | -5.344965 | -0.778798 | 6.321210   | -2.828433 | -0.412122 | 3.345040  | 115                                          | 116 | 117 |
| 40 C  | 1.829467  | -7.549408 | 6.330954   | 0.968112  | -3.994975 | 3.350197  | 118                                          | 119 | 120 |
| 41 H  | 3.209541  | -9.032389 | 6.720058   | 1.698416  | -4.779734 | 3.556101  | 121                                          | 122 | 123 |
| 42 H  | -8.476633 | 1.787722  | 6.741089   | -4.485641 | 0.946022  | 3.567231  | 124                                          | 125 | 126 |
| 43 C  | -1.389667 | -4.672202 | 7.775151   | -0.735380 | -2.472423 | 4.114433  | 127                                          | 128 | 129 |
| 44 H  | -5.338021 | -1.336820 | 8.299518   | -2.824759 | -0.707415 | 4.391916  | 130                                          | 131 | 132 |
| 45 C  | 0.372537  | -6.551215 | 8.302408   | 0.197138  | -3.466754 | 4.393445  | 133                                          | 134 | 135 |
| 46 H  | -2.522464 | -3.898293 | 9.312779   | -1.334830 | -2.062888 | 4.928111  | 136                                          | 137 | 138 |
| 47 H  | 0.610094  | -7.238124 | 10.230288  | 0.322848  | -3.830250 | 5.413635  | 139                                          | 140 | 141 |
| 48 H  | 7.194381  | -2.307935 | -10.454188 | 3.807103  | -1.221307 | -5.532118 | 142                                          | 143 | 144 |
| 49 H  | 8.106206  | -2.990877 | -5.818110  | 4.289619  | -1.582704 | -3.078811 | 145                                          | 146 | 147 |
| 50 O  | -1.719859 | 0.068592  | -2.958268  | -0.910110 | 0.036297  | -1.565448 | 148                                          | 149 | 150 |
| 51 H  | -1.723495 | -0.542114 | -4.698881  | -0.912034 | -0.286874 | -2.486541 | 151                                          | 152 | 153 |
| 52 C  | 3.298364  | 5.760634  | -2.377577  | 1.745419  | 3.048396  | -1.258160 | 154                                          | 155 | 156 |
| 53 O  | 4.797703  | 7.351654  | -2.144499  | 2.538835  | 3.890328  | -1.134820 | 157                                          | 158 | 159 |

Number of elements of the density matrix on this node (used, total): 54137 436645

=====  
Numerical Integration : Voronoi Polyhedra (Te Velde) \*\*\* (parameters, tests) \*\*\*  
=====

General Accuracy Parameter : 4.50

Symmetry used in the points section: NOSYM

Summary of the Symmetry Unique Points:

|                                |               |
|--------------------------------|---------------|
| Nr. of used Symmetry Operators | 1             |
| Points in the Atomic Spheres   | 34100         |
| Points in the Atomic Polyhedra | 339680        |
| Points in the Outer Region     | 30352         |
| Total                          | 404132        |
| Sum of Weights                 | 161131.617951 |
| Total nr. of points:           | 404132        |
| Nr. of blocks:                 | 3158          |
| Block length:                  | 128           |
| Nr. of dummy points:           | 92            |

Test of Precision of the Numerical Integration Grid  
=====

Integral of the Total Core Density: 0.0000000000000

=====  
BONDING ENERGY \*\*\* (decomposition) \*\*\*  
=====

\*\*\* WARNING \*\*\*

The bond energy is computed as an energy difference between molecule and fragments. In particular when the fragments are single atoms, they are usually computed as SPHERICALLY SYMMETRIC and SPIN-RESTRICTED. Obviously, this usually does NOT represent the true atomic groundstate.

To obtain the 'real' bond energy, (atomic) correction terms must be applied for the true (multiplet) fragment ground state. See ref: E.J.Baerends, V.Branchadell, M.Sodupe, Chem.Phys.Lett.265 (1997) 481

General theoretical background on the bond energy decomposition scheme used here (Morokuma-Ziegler) can be found in the review paper:  
F.M. Bickelhaupt and E.J. Baerends,  
"Kohn-Sham Density Functional Theory: Predicting and Understanding Chemistry"  
In: Rev. Comput. Chem.; Lipkowitz, K. B. and Boyd, D. E., Eds.;  
Wiley-VCH: New York, 2000, Vol. 15, 1-86.

Symbols used in the Bickelhaupt-Baerends (BB) paper are given below to make the direct connection to that paper, where detailed explanations can be found on the meaning of the various terms.

|                                                                                               | hartree                    | eV                | kcal/mol         | kJ/mol            |
|-----------------------------------------------------------------------------------------------|----------------------------|-------------------|------------------|-------------------|
| <b>Pauli Repulsion</b>                                                                        |                            |                   |                  |                   |
| Kinetic (Delta T^0):                                                                          | 155.556827901289495        | 4232.9167         | 97613.39         | 408414.39         |
| Delta V^Pauli Coulomb:                                                                        | -81.100290116244167        | -2206.8512        | -50891.21        | -212928.78        |
| Delta V^Pauli LDA-XC:                                                                         | -19.213422501629786        | -522.8238         | -12056.61        | -50444.83         |
| Delta V^Pauli GGA-Exchange:                                                                   | 1.116502332138559          | 30.3816           | 700.62           | 2931.38           |
| Delta V^Pauli GGA-Correlation:                                                                | -0.313061885045533         | -8.5188           | -196.45          | -821.94           |
| <b>Total Pauli Repulsion:</b>                                                                 | <b>56.046555730508565</b>  | <b>1525.1044</b>  | <b>35169.75</b>  | <b>147150.21</b>  |
| (Total Pauli Repulsion =<br>Delta E^Pauli in BB paper)                                        |                            |                   |                  |                   |
| <b>Steric Interaction</b>                                                                     |                            |                   |                  |                   |
| Pauli Repulsion (Delta E^Pauli):                                                              | 56.046555730508565         | 1525.1044         | 35169.75         | 147150.21         |
| Electrostatic Interaction:                                                                    | -11.931714335313194        | -324.6785         | -7487.26         | -31326.71         |
| (Electrostatic Interaction =<br>Delta V_elstat in the BB paper)                               |                            |                   |                  |                   |
| <b>Total Steric Interaction:</b>                                                              | <b>44.114841395195370</b>  | <b>1200.4259</b>  | <b>27682.48</b>  | <b>115823.50</b>  |
| (Total Steric Interaction =<br>Delta E^0 in the BB paper)                                     |                            |                   |                  |                   |
| <b>Orbital Interactions</b>                                                                   |                            |                   |                  |                   |
| A:                                                                                            | -57.397406466159850        | -1561.8629        | -36017.42        | -150696.87        |
| <b>Total Orbital Interactions:</b>                                                            | <b>-57.404079740144894</b> | <b>-1562.0445</b> | <b>-36021.61</b> | <b>-150714.39</b> |
| <b>Alternative Decomposition Orb.Int.</b>                                                     |                            |                   |                  |                   |
| Kinetic:                                                                                      | -142.948573281015030       | -3889.8286        | -89701.59        | -375311.43        |
| Coulomb:                                                                                      | 78.807551953418923         | 2144.4626         | 49452.49         | 206909.20         |
| XC:                                                                                           | 6.736941587451834          | 183.3215          | 4227.50          | 17687.84          |
| <b>Total Orbital Interactions:</b>                                                            | <b>-57.404079740144276</b> | <b>-1562.0445</b> | <b>-36021.61</b> | <b>-150714.39</b> |
| Residu (E=Steric+OrbInt+Res):                                                                 | -0.000009861326231         | -0.0003           | -0.01            | -0.03             |
| <b>Total Bonding Energy:</b>                                                                  | <b>-13.289248206275754</b> | <b>-361.6188</b>  | <b>-8339.13</b>  | <b>-34890.92</b>  |
| <b>Summary of Bonding Energy (energy terms are taken from the energy decomposition above)</b> |                            |                   |                  |                   |
| Electrostatic Energy:                                                                         | -11.931714335313194        | -324.6785         | -7487.26         | -31326.71         |
| Kinetic Energy:                                                                               | 12.608254620274465         | 343.0881          | 7911.80          | 33102.97          |
| Coulomb (Steric+OrbInt) Energy:                                                               | -2.292748024151479         | -62.3888          | -1438.72         | -6019.61          |
| XC Energy:                                                                                    | -11.673040467084929        | -317.6396         | -7324.94         | -30647.56         |
| <b>Total Bonding Energy:</b>                                                                  | <b>-13.289248206275136</b> | <b>-361.6188</b>  | <b>-8339.13</b>  | <b>-34890.92</b>  |

Correction terms (incorporated in energies above; only for test purposes):

1. Indication of fit-quality: 1st-order fit-correction used in the energy (hartree): -0.0122970627
2. Electrostatic (Fit correction): 0.0000000000

Scaled ZORA energy correction, not included in bonding energy (hartree): -0.0009435279

WARNING: This scaled ZORA energy correction should only be used to compare two calculations in which the only difference in the calculation is the electron configuration. Then the difference in energy of this term should be added to the difference in energy of the two electron configurations. This term should not be used otherwise. In practice it is useful only for core excitation energy calculations.

=====

FRAGMENT ENERGY TERMS \*\*\* (summed over all fragments) \*\*\*

=====

The energy terms below are (parts of) the Total Energy of the fragments from which the molecule is built.

|                                 |                             |                    |                   |                    |
|---------------------------------|-----------------------------|--------------------|-------------------|--------------------|
| <b>Exchange and Correlation</b> |                             |                    |                   |                    |
| Exchange LDA:                   | -441.224207759349497        | -12006.3216        | -276872.40        | -1158433.99        |
| Exchange GGA:                   | -37.432176164100696         | -1018.5813         | -23489.05         | -98278.16          |
| Correlation LDA:                | -23.634119862018686         | -643.1171          | -14830.64         | -62051.37          |
| Correlation GGA:                | 11.032323784875590          | 300.2048           | 6922.89           | 28965.36           |
| <b>Total XC:</b>                | <b>-491.258180000593313</b> | <b>-13367.8152</b> | <b>-308269.19</b> | <b>-1289798.17</b> |

(1) Analytical frequency

=====  
=== CALCULATE ANALYTICAL SECOND DERIVATIVES OF THE ENERGY ===  
=====





|             |             |            |
|-------------|-------------|------------|
| 467.034370  | 13.675612   | 1.600935   |
| 469.624448  | 9.310525    | 1.095981   |
| 470.216868  | 1.141507    | 0.134541   |
| 482.896056  | 8.887546    | 1.075755   |
| 483.444607  | 12.856908   | 1.557978   |
| 504.883653  | 36.819938   | 4.659641   |
| 507.807623  | 9.355799    | 1.190853   |
| 522.530639  | 33.724403   | 4.417068   |
| 524.153006  | 140.736095  | 18.490202  |
| 527.154446  | 95.921431   | 12.674522  |
| 544.700861  | 42.885542   | 5.855271   |
| 550.093614  | 22.312875   | 3.076594   |
| 557.548973  | 4.357022    | 0.608907   |
| 558.094574  | 1.608828    | 0.225059   |
| 594.813068  | 29.661087   | 4.422274   |
| 599.000477  | 196.010878  | 29.429671  |
| 626.447255  | 25.662997   | 4.029674   |
| 627.419381  | 59.842353   | 9.411193   |
| 637.213596  | 80.032462   | 12.782897  |
| 638.489782  | 101.179831  | 16.192950  |
| 643.114502  | 15.351590   | 2.474684   |
| 644.174346  | 27.853025   | 4.497321   |
| 660.266988  | 4.365773    | 0.722535   |
| 660.580028  | 14.610644   | 2.419206   |
| 714.348259  | 33.448197   | 5.989089   |
| 715.965835  | 26.170824   | 4.696645   |
| 723.424121  | 57.865807   | 10.492840  |
| 723.900660  | 152.313244  | 27.637243  |
| 741.370819  | 160.649065  | 29.853260  |
| 741.598184  | 564.815457  | 104.991297 |
| 755.986082  | 3.746835    | 0.709997   |
| 757.805645  | 4.462179    | 0.847584   |
| 783.242606  | 9.736013    | 1.911417   |
| 783.952646  | 14.334916   | 2.816846   |
| 844.224181  | 7.778876    | 1.646087   |
| 844.312307  | 0.988467    | 0.209191   |
| 863.520137  | 12.362203   | 2.675755   |
| 863.783285  | 0.040831    | 0.008840   |
| 877.387055  | 159.944591  | 35.175384  |
| 921.341680  | 0.338847    | 0.078253   |
| 921.640942  | 0.191616    | 0.044266   |
| 960.281403  | 1.112020    | 0.267663   |
| 961.229535  | 1.089729    | 0.262557   |
| 965.002859  | 4.363812    | 1.055535   |
| 966.710404  | 2.954318    | 0.715866   |
| 977.224419  | 3.571169    | 0.874748   |
| 986.831088  | 15.758801   | 3.898020   |
| 1000.796363 | 17.696533   | 4.439274   |
| 1002.894943 | 21.625067   | 5.436144   |
| 1007.296949 | 212.226065  | 53.583899  |
| 1007.606595 | 21.280562   | 5.374674   |
| 1017.732989 | 17.647608   | 4.501920   |
| 1018.825667 | 14.551174   | 3.716002   |
| 1045.359487 | 8.637767    | 2.263316   |
| 1046.157078 | 5.765163    | 1.511773   |
| 1053.060116 | 53.377860   | 14.089397  |
| 1053.928247 | 41.010280   | 10.833826  |
| 1097.561764 | 6.035138    | 1.660329   |
| 1098.331210 | 5.780453    | 1.591378   |
| 1116.935682 | 1.691179    | 0.473474   |
| 1117.331770 | 1.802195    | 0.504733   |
| 1150.827312 | 18.790640   | 5.420381   |
| 1151.527247 | 16.640031   | 4.802932   |
| 1157.881614 | 22.912397   | 6.649864   |
| 1158.874311 | 19.950828   | 5.795292   |
| 1235.092756 | 18.995903   | 5.880816   |
| 1237.613081 | 13.390915   | 4.154064   |
| 1269.077402 | 76.312062   | 24.275007  |
| 1270.488808 | 37.136759   | 11.826410  |
| 1284.349674 | 5.010608    | 1.613065   |
| 1288.716728 | 7.839993    | 2.532510   |
| 1299.142819 | 57.217024   | 18.632032  |
| 1300.501719 | 42.745415   | 13.934088  |
| 1311.724375 | 12.040688   | 3.958877   |
| 1311.811374 | 3.273681    | 1.076430   |
| 1411.722515 | 16.715005   | 5.914716   |
| 1411.861137 | 125.810812  | 44.523369  |
| 1427.450207 | 8.885498    | 3.179222   |
| 1428.273210 | 5.735058    | 2.053181   |
| 1441.709880 | 11.142139   | 4.026471   |
| 1442.295996 | 36.369995   | 13.148485  |
| 1466.758436 | 114.318932  | 42.029558  |
| 1468.608501 | 236.301105  | 86.986100  |
| 1539.792178 | 22.851811   | 8.819842   |
| 1541.146080 | 27.464689   | 10.609540  |
| 1554.774124 | 79.594112   | 31.018895  |
| 1555.875699 | 91.299100   | 35.605695  |
| 1570.687567 | 128.551915  | 50.611176  |
| 1571.825615 | 98.449366   | 38.787818  |
| 1592.638019 | 113.507303  | 45.312597  |
| 1593.486147 | 138.550934  | 55.339575  |
| 1928.160009 | 981.296587  | 474.265387 |
| 1937.661284 | 1438.862482 | 698.835922 |
| 1992.541235 | 1971.804422 | 984.802685 |
| 2000.225298 | 711.828113  | 356.888145 |
| 3082.211969 | 3.810019    | 2.943525   |
| 3082.231424 | 0.325237    | 0.251271   |
| 3090.937378 | 9.541068    | 7.392056   |
| 3091.285066 | 7.985863    | 6.187839   |
| 3097.433604 | 33.718256   | 26.178525  |
| 3101.302540 | 19.727941   | 15.335713  |
| 3102.452310 | 6.667091    | 5.184651   |
| 3103.428626 | 11.373410   | 8.847295   |
| 3104.655306 | 6.570633    | 5.113270   |
| 3105.111832 | 10.964345   | 10.090342  |
| 3116.821260 | 53.602023   | 41.876574  |
| 3117.328151 | 35.852047   | 28.013963  |
| 3130.233618 | 3.720951    | 2.919502   |
| 3131.199112 | 3.453674    | 2.710629   |
| 3136.534712 | 9.758270    | 7.671866   |
| 3137.366934 | 5.933573    | 4.666161   |
| 3669.446341 | 26.525230   | 24.397076  |

Zero-Point Energy : 0.361010 a.u.

Electronic Supplementary Information for Dalton Transactions  
This journal is © The Royal Society of Chemistry 2009

===== 9.823583 eV

List of All Frequencies:

Intensities

=====

| Frequency<br>cm-1 | Dipole Strength<br>1e-40 esu <sup>2</sup> cm <sup>2</sup> | Absorption Intensity (degeneracy not counted)<br>km/mole |
|-------------------|-----------------------------------------------------------|----------------------------------------------------------|
| 17.040740         | 0.000000                                                  | 0.000000                                                 |
| 26.438172         | 156.655852                                                | 1.038140                                                 |
| 33.277392         | 137.376168                                                | 1.145879                                                 |
| 37.135346         | 0.409233                                                  | 0.003809                                                 |
| 45.483137         | 9.692732                                                  | 0.110503                                                 |
| 67.493496         | 0.116196                                                  | 0.001966                                                 |
| 68.886486         | 5.891394                                                  | 0.101726                                                 |
| 70.801018         | 1.968734                                                  | 0.034939                                                 |
| 78.200688         | 1.863950                                                  | 0.036536                                                 |
| 87.302592         | 91.062159                                                 | 1.992706                                                 |
| 88.529409         | 23.061764                                                 | 0.511750                                                 |
| 92.790726         | 7.947372                                                  | 0.184844                                                 |
| 93.964024         | 7.475873                                                  | 0.176077                                                 |
| 97.530334         | 0.329488                                                  | 0.008055                                                 |
| 104.063886        | 33.582665                                                 | 0.875978                                                 |
| 115.017015        | 3.170330                                                  | 0.091400                                                 |
| 117.821466        | 3.041649                                                  | 0.089828                                                 |
| 127.008548        | 1.263247                                                  | 0.040216                                                 |
| 132.650004        | 38.135338                                                 | 1.267982                                                 |
| 178.572130        | 4.583738                                                  | 0.205169                                                 |
| 186.165005        | 1.751567                                                  | 0.081734                                                 |
| 189.285488        | 5.602052                                                  | 0.265792                                                 |
| 196.559531        | 6.135820                                                  | 0.302305                                                 |
| 206.680805        | 238.924685                                                | 12.377680                                                |
| 227.062068        | 46.637618                                                 | 2.654355                                                 |
| 244.674778        | 7.978691                                                  | 0.489327                                                 |
| 249.716085        | 132.778361                                                | 8.310973                                                 |
| 253.364876        | 59.943866                                                 | 3.806880                                                 |
| 261.492923        | 17.002436                                                 | 1.114421                                                 |
| 263.662617        | 15.934385                                                 | 1.053081                                                 |
| 285.351592        | 55.239138                                                 | 3.950984                                                 |
| 286.235572        | 16.430491                                                 | 1.178833                                                 |
| 348.785885        | 313.520715                                                | 27.409632                                                |
| 365.689417        | 50.727570                                                 | 4.649803                                                 |
| 366.209449        | 13.725556                                                 | 1.259904                                                 |
| 413.962491        | 103.821211                                                | 10.772715                                                |
| 415.716332        | 24.960470                                                 | 2.600926                                                 |
| 422.869179        | 611.613177                                                | 64.827748                                                |
| 424.036080        | 32.595351                                                 | 3.464468                                                 |
| 426.155995        | 312.829631                                                | 33.416007                                                |
| 465.696301        | 29.212102                                                 | 3.409916                                                 |
| 467.034370        | 13.675612                                                 | 1.600935                                                 |
| 469.624448        | 9.310525                                                  | 1.095981                                                 |
| 470.216868        | 1.141507                                                  | 0.134541                                                 |
| 482.896056        | 8.887546                                                  | 1.075755                                                 |
| 483.444607        | 12.856908                                                 | 1.557978                                                 |
| 504.883653        | 36.819938                                                 | 4.659641                                                 |
| 507.807623        | 9.355799                                                  | 1.190853                                                 |
| 522.530639        | 33.724403                                                 | 4.417068                                                 |
| 524.153006        | 140.736095                                                | 18.490202                                                |
| 527.154446        | 95.921431                                                 | 12.674522                                                |
| 544.700861        | 42.885542                                                 | 5.855271                                                 |
| 550.093614        | 22.312875                                                 | 3.076594                                                 |
| 557.548973        | 4.357022                                                  | 0.608907                                                 |
| 558.094574        | 1.608828                                                  | 0.225059                                                 |
| 594.813068        | 29.661087                                                 | 4.422274                                                 |
| 599.000477        | 196.010878                                                | 29.429671                                                |
| 626.447255        | 25.662997                                                 | 4.029674                                                 |
| 627.419381        | 59.842353                                                 | 9.411193                                                 |
| 637.213596        | 80.032462                                                 | 12.782897                                                |
| 638.489782        | 101.179831                                                | 16.192950                                                |
| 643.114502        | 15.351590                                                 | 2.474684                                                 |
| 644.174346        | 27.853025                                                 | 4.497321                                                 |
| 660.266988        | 4.365773                                                  | 0.722535                                                 |
| 660.580028        | 14.610644                                                 | 2.419206                                                 |
| 714.348259        | 33.448197                                                 | 5.989089                                                 |
| 715.965835        | 26.170824                                                 | 4.696645                                                 |
| 723.424121        | 57.865807                                                 | 10.492840                                                |
| 723.900660        | 152.313244                                                | 27.637243                                                |
| 741.370819        | 160.649065                                                | 29.853260                                                |
| 741.598184        | 564.815457                                                | 104.991297                                               |
| 755.986082        | 3.746835                                                  | 0.709997                                                 |
| 757.805645        | 4.462179                                                  | 0.847584                                                 |
| 783.242606        | 9.736013                                                  | 1.911417                                                 |
| 783.952646        | 14.334916                                                 | 2.816846                                                 |
| 844.224181        | 7.778876                                                  | 1.646087                                                 |
| 844.312307        | 0.988467                                                  | 0.209191                                                 |
| 863.520137        | 12.362203                                                 | 2.675755                                                 |
| 863.783285        | 0.040831                                                  | 0.008840                                                 |
| 877.387055        | 159.944591                                                | 35.175384                                                |
| 921.341680        | 0.338847                                                  | 0.078253                                                 |
| 921.640942        | 0.191616                                                  | 0.044266                                                 |
| 960.281403        | 1.112020                                                  | 0.267663                                                 |
| 961.229535        | 1.089729                                                  | 0.262557                                                 |
| 965.002859        | 4.363812                                                  | 1.055535                                                 |
| 966.710404        | 2.954318                                                  | 0.715866                                                 |
| 977.224419        | 3.571169                                                  | 0.874748                                                 |
| 986.831088        | 15.758801                                                 | 3.898020                                                 |
| 1000.796363       | 17.696533                                                 | 4.439274                                                 |
| 1002.894943       | 21.625067                                                 | 5.436144                                                 |
| 1007.296949       | 212.226065                                                | 53.583899                                                |
| 1007.606595       | 21.280562                                                 | 5.374674                                                 |
| 1017.732989       | 17.647608                                                 | 4.501920                                                 |
| 1018.825667       | 14.551174                                                 | 3.716002                                                 |
| 1045.359487       | 8.637767                                                  | 2.263316                                                 |
| 1046.157078       | 5.765163                                                  | 1.531773                                                 |
| 1053.060116       | 53.377860                                                 | 14.089397                                                |
| 1053.928247       | 41.010280                                                 | 10.833826                                                |
| 1097.561764       | 6.035138                                                  | 1.660329                                                 |
| 1098.331210       | 5.780453                                                  | 1.591378                                                 |
| 1116.935682       | 1.691179                                                  | 0.473474                                                 |
| 1117.331770       | 1.802195                                                  | 0.504733                                                 |
| 1150.827312       | 18.790640                                                 | 5.420381                                                 |
| 1151.527247       | 16.640031                                                 | 4.802932                                                 |

|             |             |            |
|-------------|-------------|------------|
| 1157.881614 | 22.912397   | 6.649864   |
| 1158.874311 | 19.950828   | 5.795292   |
| 1235.092756 | 18.995903   | 5.880816   |
| 1237.613081 | 13.390915   | 4.154064   |
| 1269.077402 | 76.312062   | 24.275007  |
| 1270.488808 | 37.136759   | 11.826410  |
| 1284.349674 | 5.010608    | 1.613065   |
| 1288.716728 | 7.839993    | 2.532510   |
| 1299.142819 | 57.217024   | 18.632032  |
| 1300.501719 | 42.745415   | 13.934088  |
| 1311.724375 | 12.040688   | 3.958877   |
| 1311.811374 | 3.273681    | 1.076430   |
| 1411.722515 | 16.715005   | 5.914716   |
| 1411.861137 | 125.810812  | 44.523369  |
| 1427.450207 | 8.885498    | 3.179222   |
| 1428.273210 | 5.735058    | 2.053181   |
| 1441.709880 | 11.142139   | 4.026471   |
| 1442.295996 | 36.369995   | 13.148485  |
| 1466.758436 | 114.318932  | 42.029558  |
| 1468.608501 | 236.301105  | 86.986100  |
| 1539.792178 | 22.851811   | 8.819842   |
| 1541.146080 | 27.464689   | 10.609540  |
| 1554.774124 | 79.594112   | 31.018895  |
| 1555.875699 | 91.299100   | 35.605695  |
| 1570.687567 | 128.551915  | 50.611176  |
| 1571.825615 | 98.449366   | 38.787818  |
| 1592.638019 | 113.507303  | 45.312597  |
| 1593.486147 | 138.550934  | 55.339575  |
| 1928.160009 | 981.296587  | 474.265387 |
| 1937.661284 | 1438.862482 | 698.835922 |
| 1992.541235 | 1971.804422 | 984.802685 |
| 2000.225298 | 711.828113  | 356.888145 |
| 3082.211969 | 3.810019    | 2.943525   |
| 3082.231424 | 0.325237    | 0.251271   |
| 3090.937378 | 9.541068    | 7.392056   |
| 3091.285066 | 7.985863    | 6.187839   |
| 3097.433604 | 33.718256   | 26.178525  |
| 3101.302540 | 19.727941   | 15.335713  |
| 3102.452310 | 6.667091    | 5.184651   |
| 3103.428626 | 11.373410   | 8.847295   |
| 3104.655306 | 6.570633    | 5.113270   |
| 3105.111832 | 12.964345   | 10.090342  |
| 3116.821260 | 53.602023   | 41.876574  |
| 3117.328151 | 35.852047   | 28.013963  |
| 3130.233618 | 3.720951    | 2.919502   |
| 3131.199112 | 3.453674    | 2.710629   |
| 3136.534712 | 9.758270    | 7.671866   |
| 3137.366934 | 5.933573    | 4.666161   |
| 3669.446341 | 26.525230   | 24.397076  |

=====  
 Statistical Thermal Analysis \*\*\* ideal gas assumed \*\*\*  
 =====

Pressure: 1.000000 atm.  
 Temperature: 298.150000 K

Moments of Inertia (and direction vectors)  
 =====

| 11787.9551 | 24336.9248 | 28798.3976 |
|------------|------------|------------|
| -0.2203    | 0.6547     | -0.7230    |
| -0.5769    | -0.6852    | -0.4446    |
| 0.7865     | -0.3192    | -0.5287    |

The rotational contribution to the molecular entropy includes a term, dependent on the symmetry number sigma. The results reported below were computed using sigma = 1, determined from the point group symmetry of the input geometry (NOSYM). If this is not the correct symmetry, please contact SCM to report a bug.

| Temp   |                                             | Transl | Rotat  | Vibrat  | Total   |
|--------|---------------------------------------------|--------|--------|---------|---------|
| 298.15 | Entropy (cal/mole-K):                       | 45.414 | 37.355 | 124.249 | 207.019 |
|        | Internal Energy (Kcal/mole):                | 0.889  | 0.889  | 245.397 | 247.174 |
|        | Constant Volume Heat Capacity (cal/mole-K): | 2.981  | 2.981  | 120.440 | 126.402 |

\*\*\*\*\*

=====  
 \*\*\* DONE CALCULATING ANALYTICAL SECOND DERIVATIVES OF THE ENERGY \*\*\*  
 =====

=====  
 SCAN POTENTIAL ENERGY SURFACE ALONG A RANGE OF NORMAL MODES \*\*\* with IR intensities \*\*\*  
 =====

RANGE OF FREQUENCIES: from -1000.000 to 0.000

=====  
 Vibration symmetry: \*\*\* A \*\*\*  
 =====

Total number of frequencies of this symmetry: 153

| Frequencies, cm <sup>-1</sup> : |         |         |         |         |         |         |         |
|---------------------------------|---------|---------|---------|---------|---------|---------|---------|
| 17.041                          | 26.438  | 33.277  | 37.135  | 45.483  | 67.493  | 68.886  | 70.801  |
| 78.201                          | 87.303  | 88.529  | 92.791  | 93.964  | 97.530  | 104.064 | 115.017 |
| 117.821                         | 127.009 | 132.650 | 178.572 | 186.165 | 189.285 | 196.560 | 206.681 |
| 227.062                         | 244.675 | 249.716 | 253.365 | 261.493 | 263.663 | 285.352 | 286.236 |



Hyperfine or Zeeman Interaction: ---

Fragment File(s)

-----  
C:  
file : t21.C  
jobid: ADF 2007.01 RunTime: Jul21-2008 14:55:50  
title: Carbon (TZP)  
H:  
file : t21.H  
jobid: ADF 2007.01 RunTime: Jul21-2008 14:55:48  
title: Hydrogen (TZP)  
O:  
file : t21.O  
jobid: ADF 2007.01 RunTime: Jul21-2008 14:55:50  
title: Oxygen (TZP)  
N:  
file : t21.N  
jobid: ADF 2007.01 RunTime: Jul21-2008 14:55:48  
title: Nitrogen (TZP)  
Ru:  
file : t21.Ru  
jobid: ADF 2007.01 RunTime: Jul21-2008 14:55:49  
title: Ruthenium (TZP, all electron)  
Cl:  
file : t21.Cl  
jobid: ADF 2007.01 RunTime: Jul21-2008 14:55:48  
title: Chlorine (TZP)

\*\*\*\*\*  
\* R U N T Y P E : GEOMETRY OPTIMIZATION \*  
\*\*\*\*\*

=====  
Geometry Convergence Tests  
=====

Energy old : -13.28127687  
new : -13.28129072

Convergence tests:  
(Energies in hartree, Gradients in hartree/angstr or radian, Lengths in angstrom, Angles in degrees)

| Item             | Value       | Criterion  | Conv. | Ratio      |
|------------------|-------------|------------|-------|------------|
| change in energy | -0.00001385 | 0.00100000 | YES   | 3.02500724 |
| gradient max     | 0.00091858  | 0.00100000 | YES   | 0.65098898 |
| gradient rms     | 0.00017813  | 0.00066667 | YES   | 0.80069931 |
| cart. step max   | 0.00239815  | 0.01000000 | YES   | 0.95527167 |
| cart. step rms   | 0.00076030  | 0.00666667 | YES   | 0.99891458 |

prediction dE : -0.00000930

\*\*\*\*\*  
Geometry CONVERGED  
\*\*\*\*\*

\*\*\*\*\*  
\* Final Geometry \*  
\*\*\*\*\*

Coordinates (Cartesian)  
=====

| Atom  | bohr      |           |           | angstrom  |           |           | Geometric Variables   |     |     |
|-------|-----------|-----------|-----------|-----------|-----------|-----------|-----------------------|-----|-----|
|       | X         | Y         | Z         | X         | Y         | Z         | (0:frozen, *:LT par.) |     |     |
| 1 C   | 6.297919  | -0.661172 | -5.694266 | 3.332715  | -0.349877 | -3.013276 | 1                     | 2   | 3   |
| 2 H   | 2.194933  | -0.511439 | -5.210282 | 1.161508  | -0.270642 | -2.757163 | 4                     | 5   | 6   |
| 3 O   | -0.239925 | 7.188616  | -5.082958 | -0.126963 | 3.804052  | -2.689786 | 7                     | 8   | 9   |
| 4 C   | 4.047745  | 0.189410  | -4.639367 | 2.141974  | 0.100231  | -2.455048 | 10                    | 11  | 12  |
| 5 C   | 8.569264  | 0.317993  | -4.760013 | 4.534659  | 0.168274  | -2.518890 | 13                    | 14  | 15  |
| 6 O   | -1.230123 | -0.111281 | -2.692998 | -0.650953 | -0.058887 | -1.425073 | 16                    | 17  | 18  |
| 7 C   | 0.098548  | 5.666371  | -3.526985 | 0.052149  | 2.998514  | -1.866400 | 19                    | 20  | 21  |
| 8 N   | 3.998163  | 1.922902  | -2.776327 | 2.115737  | 1.017556  | -1.469169 | 22                    | 23  | 24  |
| 9 O   | 3.390550  | -6.003242 | -2.138229 | 1.794202  | -3.176779 | -1.131502 | 25                    | 26  | 27  |
| 10 C  | 8.512800  | 2.109978  | -2.841200 | 4.504780  | 1.116552  | -1.503498 | 28                    | 29  | 30  |
| 11 O  | -4.420933 | -7.183936 | -2.535749 | -2.339457 | -3.801575 | -1.341860 | 31                    | 32  | 33  |
| 12 H  | 10.263614 | 2.892637  | -2.101268 | 5.431271  | 1.530718  | -1.111943 | 34                    | 35  | 36  |
| 13 C  | 1.693656  | -4.859326 | -1.324795 | 0.896244  | -2.571445 | -0.701051 | 37                    | 38  | 39  |
| 14 C  | 6.186378  | 2.929447  | -1.855197 | 3.273690  | 1.550197  | -0.981728 | 40                    | 41  | 42  |
| 15 C  | -3.179112 | -5.673832 | -1.520861 | -1.682314 | -3.002463 | -0.804805 | 43                    | 44  | 45  |
| 16 Ru | 0.605551  | 3.269703  | -0.997698 | 0.320444  | 1.730252  | -0.527959 | 46                    | 47  | 48  |
| 17 H  | -5.736672 | 0.539140  | -0.558410 | -3.035716 | 0.285301  | -0.295498 | 49                    | 50  | 51  |
| 18 Ru | -1.147645 | -3.293353 | 0.099683  | -0.607308 | -1.742767 | 0.052989  | 52                    | 53  | 54  |
| 19 C  | 5.847403  | 4.850842  | 0.100135  | 3.094313  | 2.566955  | 0.052989  | 55                    | 56  | 57  |
| 20 C  | -2.310666 | 4.739824  | 0.854431  | -1.074794 | 2.508207  | 0.452145  | 58                    | 59  | 60  |
| 21 C  | 3.319201  | 1.512902  | 0.732326  | 1.756445  | 2.918734  | 0.387530  | 61                    | 62  | 63  |
| 22 C  | -6.032978 | -0.143454 | 1.359926  | -3.192514 | -0.075912 | 0.719642  | 64                    | 65  | 66  |
| 23 Cl | 1.418260  | -0.011256 | 2.305880  | 0.750511  | -0.005957 | 1.220219  | 67                    | 68  | 69  |
| 24 H  | 9.836122  | 5.469719  | 0.858795  | 5.205051  | 2.894447  | 0.454455  | 70                    | 71  | 72  |
| 25 H  | -9.327312 | 2.133745  | 2.058318  | -4.935801 | 1.129129  | 1.089215  | 73                    | 74  | 75  |
| 26 C  | 7.904672  | 6.020752  | 1.320151  | 4.182972  | 3.186045  | 0.698504  | 76                    | 77  | 78  |
| 27 O  | -3.558716 | -8.836056 | 2.006845  | -1.883192 | 3.088308  | 1.061977  | 79                    | 80  | 81  |
| 28 N  | -4.345342 | -1.852091 | 2.203283  | -2.299456 | -0.980085 | 1.165927  | 82                    | 83  | 84  |
| 29 H  | 2.139194  | -8.009416 | 2.533462  | -1.132013 | -4.238401 | 1.340650  | 85                    | 86  | 87  |
| 30 C  | -8.019930 | 0.743770  | 2.826783  | -4.243964 | 0.393586  | 1.495869  | 88                    | 89  | 90  |
| 31 C  | 2.968086  | 7.421472  | 2.549454  | 1.570644  | 3.927274  | 1.349113  | 91                    | 92  | 93  |
| 32 H  | 1.066113  | 8.013539  | 3.077427  | 0.564163  | 4.240582  | 1.628504  | 94                    | 95  | 96  |
| 33 C  | -0.964508 | -5.456851 | 3.353013  | -0.510395 | -2.887681 | 1.774338  | 97                    | 98  | 99  |
| 34 C  | 7.500596  | 7.873114  | 3.142553  | 3.969139  | 4.166272  | 1.662968  | 100                   | 101 | 102 |
| 35 C  | 0.777934  | -7.374595 | 3.943985  | 0.411665  | -3.902468 | 2.087067  | 103                   | 104 | 105 |
| 36 C  | 5.021651  | 8.581225  | 3.743219  | 2.657343  | 4.540989  | 1.980826  | 106                   | 107 | 108 |
| 37 H  | 9.099587  | 8.759874  | 4.092043  | 4.815294  | 4.635526  | 2.165416  | 109                   | 110 | 111 |
| 38 C  | -4.568272 | -2.806537 | 4.593515  | -2.417426 | -1.485155 | 2.430784  | 112                   | 113 | 114 |

|      |           |           |           |           |           |           |     |     |     |
|------|-----------|-----------|-----------|-----------|-----------|-----------|-----|-----|-----|
| 39 C | -8.249395 | -0.172420 | 5.296590  | -4.365392 | -0.091241 | 2.802834  | 115 | 116 | 117 |
| 40 H | 4.683247  | 10.040232 | 5.161742  | 2.478268  | 5.313062  | 2.731476  | 118 | 119 | 120 |
| 41 C | -2.711374 | -4.734210 | 5.263183  | -1.434797 | -2.505236 | 2.785157  | 121 | 122 | 123 |
| 42 C | -6.524568 | -1.943649 | 6.174009  | -3.452653 | -1.028535 | 3.267145  | 124 | 125 | 126 |
| 43 C | 0.833737  | -8.493692 | 6.337107  | 0.441195  | -4.494668 | 3.353453  | 127 | 128 | 129 |
| 44 H | 2.222052  | -9.965126 | 6.740524  | 1.175859  | -5.273318 | 3.566932  | 130 | 131 | 132 |
| 45 H | -9.767887 | 0.491510  | 6.522215  | -5.168943 | 0.260096  | 3.451408  | 133 | 134 | 135 |
| 46 C | -2.636607 | -5.865641 | 7.673871  | -1.395233 | -3.103963 | 4.060838  | 136 | 137 | 138 |
| 47 H | -6.683862 | -2.684657 | 8.084408  | -3.536947 | -1.420659 | 4.278085  | 139 | 140 | 141 |
| 48 C | -0.868366 | -7.733018 | 8.217424  | -0.459519 | -4.092137 | 4.348473  | 142 | 143 | 144 |
| 49 H | -3.956408 | -5.276234 | 9.142636  | -2.093641 | -2.792063 | 4.838074  | 145 | 146 | 147 |
| 50 H | -0.810014 | -8.592360 | 10.088920 | -0.428641 | -4.546881 | 5.338826  | 148 | 149 | 150 |
| 51 H | 10.374263 | -0.315639 | -5.528174 | 5.489823  | -0.167029 | -2.925384 | 151 | 152 | 153 |
| 52 H | 6.262264  | -2.071899 | -7.191736 | 3.313848  | -1.096402 | -3.805703 | 154 | 155 | 156 |
| 53 H | -2.894959 | 0.206005  | -3.406223 | -1.531946 | 0.109013  | -1.802496 | 157 | 158 | 159 |

Number of elements of the density matrix on this node (used, total): 110446 436645

=====  
Numerical Integration : Voronoi Polyhedra (Te Velde) \*\*\* (parameters, tests) \*\*\*  
=====

General Accuracy Parameter : 4.50

Symmetry used in the points section: NOSYM

Summary of the Symmetry Unique Points:

|                                |               |
|--------------------------------|---------------|
| Nr. of used Symmetry Operators | 1             |
| Points in the Atomic Spheres   | 34100         |
| Points in the Atomic Polyhedra | 350078        |
| Points in the Outer Region     | 28232         |
| Total                          | 412410        |
| Sum of Weights                 | 160042.049757 |
| Total nr. of points:           | 412410        |
| Nr. of blocks:                 | 3222          |
| Block length:                  | 128           |
| Nr. of dummy points:           | 6             |

Test of Precision of the Numerical Integration Grid

Integral of the Total Core Density: 0.00000000000000

=====  
B O N D I N G E N E R G Y \*\*\* (decomposition) \*\*\*  
=====

\*\*\* WARNING \*\*\*

The bond energy is computed as an energy difference between molecule and fragments. In particular when the fragments are single atoms, they are usually computed as SPHERICALLY SYMMETRIC and SPIN-RESTRICTED. Obviously, this usually does NOT represent the true atomic groundstate.

To obtain the 'real' bond energy, (atomic) correction terms must be applied for the true (multiplet) fragment ground state. See ref: E.J.Baerends, V.Branchadell, M.Sodupe, Chem.Phys.Lett.265 (1997) 481

General theoretical background on the bond energy decomposition scheme used here (Morokuma-Ziegler) can be found in the review paper: F.M. Bickelhaupt and E.J. Baerends, "Kohn-Sham Density Functional Theory: Predicting and Understanding Chemistry" In: Rev. Comput. Chem.; Lipkowitz, K. B. and Boyd, D. B., Eds.; Wiley-VCH: New York, 2000, Vol. 15, 1-86.

Symbols used in the Bickelhaupt-Baerends (BB) paper are given below to make the direct connection to that paper, where detailed explanations can be found on the meaning of the various terms.

|                                                                     | hartree              | eV         | kcal/mol  | kJ/mol     |
|---------------------------------------------------------------------|----------------------|------------|-----------|------------|
| Pauli Repulsion                                                     |                      |            |           |            |
| Kinetic ( $\Delta T^0$ ):                                           | 155.613715490342486  | 4234.4646  | 97649.09  | 408563.75  |
| Delta $V^*$ Pauli Coulomb:                                          | -81.126247664590210  | -2207.5575 | -50907.49 | -212996.93 |
| Delta $V^*$ Pauli LDA-XC:                                           | -19.212791055266962  | -522.8066  | -12056.21 | -50443.18  |
| Delta $V^*$ Pauli GGA-Exchange:                                     | 1.115304599827454    | 30.3490    | 699.86    | 2928.23    |
| Delta $V^*$ Pauli GGA-Correlation:                                  | -0.312584890754518   | -8.5059    | -196.15   | -820.69    |
| Total Pauli Repulsion:                                              | 56.077396479558246   | 1525.9436  | 35189.10  | 147231.18  |
| (Total Pauli Repulsion =<br>Delta $E^*$ Pauli in BB paper)          |                      |            |           |            |
| Steric Interaction                                                  |                      |            |           |            |
| Pauli Repulsion (Delta $E^*$ Pauli):                                | 56.077396479558246   | 1525.9436  | 35189.10  | 147231.18  |
| Electrostatic Interaction:                                          | -11.937367003857224  | -324.8323  | -7490.81  | -31341.55  |
| (Electrostatic Interaction =<br>Delta $V_{elstat}$ in the BB paper) |                      |            |           |            |
| Total Steric Interaction:                                           | 44.140029475701020   | 1201.1113  | 27698.29  | 115889.63  |
| (Total Steric Interaction =<br>Delta $E^*$ in the BB paper)         |                      |            |           |            |
| Orbital Interactions                                                |                      |            |           |            |
| A:                                                                  | -57.416027579238865  | -1562.3696 | -36029.11 | -150745.76 |
| Total Orbital Interactions:                                         | -57.421311759939783  | -1562.5134 | -36032.42 | -150759.63 |
| Alternative Decomposition Orb.Int.                                  |                      |            |           |            |
| Kinetic:                                                            | -143.020143406212128 | -3891.7761 | -89746.50 | -375499.33 |
| Coulomb:                                                            | 78.857855445746409   | 2145.8314  | 49484.06  | 207041.27  |
| XC:                                                                 | 6.740976200525938    | 183.4313   | 4230.03   | 17698.43   |

Electronic Supplementary Information for Dalton Transactions  
This journal is © The Royal Society of Chemistry 2009

|                               |                     |            |           |            |
|-------------------------------|---------------------|------------|-----------|------------|
| Total Orbital Interactions:   | -57.421311759939783 | -1562.5134 | -36032.42 | -150759.63 |
| Residu (E=Steric+OrbInt+Res): | -0.000017337666824  | -0.0005    | -0.01     | -0.05      |
| Total Bonding Energy:         | -13.281299621905587 | -361.4026  | -8334.14  | -34870.05  |

Summary of Bonding Energy (energy terms are taken from the energy decomposition above)

|                                 |                     |           |          |           |
|---------------------------------|---------------------|-----------|----------|-----------|
| Electrostatic Energy:           | -11.937367003857224 | -324.8323 | -7490.81 | -31341.55 |
| Kinetic Energy:                 | 12.593572084130358  | 342.6885  | 7902.59  | 33064.42  |
| Coulomb (Steric+OrbInt) Energy: | -2.268409556510619  | -61.7266  | -1423.45 | -5955.71  |
| XC Energy:                      | -11.669095145668091 | -317.5322 | -7322.47 | -30637.20 |
| Total Bonding Energy:           | -13.281299621905577 | -361.4026 | -8334.14 | -34870.05 |

Correction terms (incorporated in energies above; only for test purposes):

1. Indication of fit-quality: 1st-order fit-correction used in the energy (hartree): -0.0146752026
2. Electrostatic (Fit correction): 0.0000000000

Scaled ZORA energy correction, not included in bonding energy (hartree): -0.0009369310

WARNING: This scaled ZORA energy correction should only be used to compare two calculations in which the only difference in the calculation is the electron configuration. Then the difference in energy of this term should be added to the difference in energy of the two electron configurations. This term should not be used otherwise. In practice it is useful only for core excitation energy calculations.

=====

B O N D - O R D E R A N A L Y S I S

=====

|    |         | DIST. [A] |        | BOND-ORDERS<br>(THRESHOLD = 0.050 ) |        |         |         |             |
|----|---------|-----------|--------|-------------------------------------|--------|---------|---------|-------------|
|    |         |           |        | MAYER                               | G-J    | N-M (1) | N-M (2) | N-M (3) (*) |
| C  | 1 - C   | 4         | 1.3900 | 1.4260                              | 1.4355 | 1.4936  | 1.4833  | 1.5318      |
| C  | 1 - C   | 5         | 1.3991 | 1.3557                              | 1.3996 | 1.4581  | 1.4224  | 1.5157      |
| C  | 1 - C   | 14        | 2.7823 | 0.0593                              | 0.0932 | 0.0964  | 0.1241  | 0.0970      |
| C  | 1 - H   | 52        | 1.0889 | 1.0291                              | 0.9230 | 0.9703  | 0.9857  | 0.9052      |
| H  | 2 - C   | 4         | 1.0909 | 1.0158                              | 0.8922 | 0.9331  | 0.9194  | 0.8472      |
| O  | 3 - C   | 7         | 1.1657 | 2.0275                              | 2.1718 | 2.3450  | 2.3569  | 2.3886      |
| O  | 3 - Ru  | 16        | 3.0289 | 0.2244                              | 0.2595 | 0.3007  | 0.4289  | 0.2968      |
| C  | 4 - N   | 8         | 1.3469 | 1.3690                              | 1.3913 | 1.4667  | 1.4530  | 1.5137      |
| C  | 4 - C   | 10        | 2.7425 | 0.0631                              | 0.1082 | 0.1125  | 0.1089  | 0.1152      |
| C  | 5 - N   | 8         | 2.7703 | 0.0368                              | 0.0929 | 0.0980  | 0.0677  | 0.1025      |
| C  | 5 - C   | 10        | 1.3897 | 1.4139                              | 1.4691 | 1.5295  | 1.4960  | 1.5875      |
| C  | 5 - H   | 51        | 1.0909 | 1.0271                              | 0.9239 | 0.9688  | 0.9753  | 0.8987      |
| O  | 6 - Ru  | 16        | 2.2247 | 0.3080                              | 0.2762 | 0.3549  | 0.7718  | 0.3979      |
| O  | 6 - Ru  | 18        | 2.2408 | 0.2961                              | 0.2629 | 0.3384  | 0.7542  | 0.3794      |
| O  | 6 - C   | 21        | 4.2364 | 0.0478                              | 0.1030 | 0.1247  | -0.0085 | 0.1491      |
| O  | 6 - C   | 33        | 4.2729 | 0.0431                              | 0.1016 | 0.1231  | -0.0076 | 0.1471      |
| O  | 6 - H   | 53        | 0.9730 | 1.1497                              | 0.8768 | 1.1211  | 1.1870  | 1.1470      |
| C  | 7 - Ru  | 16        | 1.8633 | 1.1076                              | 1.1245 | 1.2164  | 1.0484  | 1.1138      |
| C  | 7 - C   | 20        | 2.6241 | 0.0859                              | 0.0760 | 0.0763  | 0.0397  | 0.0723      |
| C  | 7 - C   | 21        | 2.8269 | 0.0685                              | 0.0562 | 0.0566  | 0.0850  | 0.0560      |
| C  | 7 - Cl  | 23        | 4.3637 | 0.0697                              | 0.1369 | 0.1568  | 0.2212  | 0.1736      |
| N  | 8 - C   | 14        | 1.3646 | 1.2879                              | 1.3057 | 1.3688  | 1.3884  | 1.3864      |
| N  | 8 - Ru  | 16        | 2.1487 | 0.2841                              | 0.3386 | 0.3778  | 0.4921  | 0.3671      |
| N  | 8 - C   | 20        | 4.0116 | 0.0444                              | 0.1212 | 0.1258  | 0.1630  | 0.1267      |
| O  | 9 - C   | 13        | 1.1654 | 2.0047                              | 2.1733 | 2.3519  | 2.3624  | 2.3991      |
| O  | 9 - Ru  | 18        | 3.0374 | 0.2275                              | 0.2517 | 0.2925  | 0.4215  | 0.2889      |
| C  | 10 - H  | 12        | 1.0878 | 1.0181                              | 0.9218 | 0.9640  | 0.9775  | 0.9032      |
| C  | 10 - C  | 14        | 1.4057 | 1.3668                              | 1.3433 | 1.3889  | 1.4062  | 1.3950      |
| O  | 11 - C  | 15        | 1.1657 | 2.0281                              | 2.1730 | 2.3462  | 2.3578  | 2.3901      |
| O  | 11 - Ru | 18        | 3.0305 | 0.2247                              | 0.2599 | 0.3018  | 0.4284  | 0.2979      |
| C  | 13 - C  | 15        | 2.6164 | 0.0923                              | 0.0762 | 0.0766  | 0.0358  | 0.0724      |
| C  | 13 - Ru | 18        | 1.8750 | 1.0800                              | 1.0935 | 1.1873  | 1.0282  | 1.0889      |
| C  | 13 - N  | 28        | 4.0287 | 0.0428                              | 0.1184 | 0.1232  | 0.1660  | 0.1238      |
| C  | 14 - C  | 19        | 1.4617 | 1.1765                              | 1.1025 | 1.1356  | 1.1373  | 1.1201      |
| C  | 15 - Ru | 18        | 1.8649 | 1.1013                              | 1.1211 | 1.2153  | 1.0506  | 1.1137      |
| C  | 15 - Cl | 23        | 4.3587 | 0.0709                              | 0.1388 | 0.1590  | 0.2225  | 0.1760      |
| C  | 15 - C  | 33        | 2.8352 | 0.0706                              | 0.0543 | 0.0547  | 0.0822  | 0.0542      |
| Ru | 16 - C  | 20        | 1.8742 | 1.1148                              | 1.1053 | 1.1972  | 1.0504  | 1.1009      |
| Ru | 16 - C  | 21        | 2.0767 | 0.6650                              | 0.7236 | 0.7863  | 0.8396  | 0.7534      |
| Ru | 16 - Cl | 23        | 2.5011 | 0.5946                              | 0.3252 | 0.3982  | 0.5744  | 0.4266      |
| Ru | 16 - O  | 27        | 3.0378 | 0.2266                              | 0.2574 | 0.2987  | 0.4333  | 0.2955      |
| H  | 17 - C  | 22        | 1.0888 | 1.0139                              | 0.9136 | 0.9501  | 0.9394  | 0.8739      |
| Ru | 18 - Cl | 23        | 2.4946 | 0.6008                              | 0.3315 | 0.4067  | 0.5807  | 0.4357      |
| Ru | 18 - N  | 28        | 2.1643 | 0.2814                              | 0.3315 | 0.3711  | 0.4872  | 0.3610      |
| Ru | 18 - C  | 33        | 2.0698 | 0.6612                              | 0.7350 | 0.8005  | 0.8515  | 0.7670      |
| C  | 19 - C  | 21        | 1.4232 | 1.3293                              | 1.3166 | 1.3474  | 1.3393  | 1.3761      |
| C  | 19 - C  | 26        | 1.4090 | 1.3400                              | 1.3433 | 1.3922  | 1.3821  | 1.4253      |
| C  | 19 - C  | 36        | 2.7936 | 0.0527                              | 0.0924 | 0.0958  | 0.0902  | 0.0980      |
| C  | 20 - O  | 27        | 1.1670 | 1.9969                              | 2.1556 | 2.3342  | 2.3416  | 2.3917      |
| C  | 21 - C  | 31        | 1.4058 | 1.3994                              | 1.4142 | 1.4506  | 1.4175  | 1.5063      |
| C  | 21 - C  | 31        | 2.8424 | 0.0423                              | 0.0997 | 0.1025  | 0.0761  | 0.1066      |
| C  | 22 - N  | 28        | 1.3469 | 1.3693                              | 1.3923 | 1.4685  | 1.4552  | 1.5160      |
| C  | 22 - C  | 30        | 1.3887 | 1.4313                              | 1.4407 | 1.4981  | 1.4886  | 1.5358      |
| C  | 22 - C  | 42        | 2.7322 | 0.0626                              | 0.1080 | 0.1123  | 0.1094  | 0.1148      |
| H  | 24 - C  | 26        | 1.0905 | 1.0266                              | 0.9270 | 0.9636  | 0.9745  | 0.9102      |
| C  | 25 - C  | 30        | 1.0886 | 1.0265                              | 0.9228 | 0.9703  | 0.9857  | 0.9048      |
| C  | 26 - C  | 31        | 2.7923 | 0.0599                              | 0.1092 | 0.1134  | 0.0843  | 0.1180      |
| C  | 26 - C  | 34        | 1.3916 | 1.4124                              | 1.4650 | 1.5247  | 1.4836  | 1.5884      |
| N  | 28 - C  | 38        | 1.3671 | 1.2858                              | 1.3037 | 1.3682  | 1.3886  | 1.3862      |
| N  | 28 - C  | 39        | 2.7817 | 0.0372                              | 0.0923 | 0.0976  | 0.0671  | 0.1021      |
| H  | 28 - C  | 35        | 1.0904 | 1.0237                              | 0.9226 | 0.9611  | 0.9734  | 0.9037      |
| C  | 30 - C  | 38        | 2.7821 | 0.0577                              | 0.0913 | 0.0945  | 0.1227  | 0.0950      |
| C  | 30 - C  | 39        | 1.3993 | 1.3496                              | 1.3926 | 1.4510  | 1.4159  | 1.5080      |
| C  | 31 - H  | 32        | 1.0905 | 1.0241                              | 0.9226 | 0.9612  | 0.9735  | 0.9039      |
| C  | 31 - C  | 36        | 1.3988 | 1.3996                              | 1.4352 | 1.4904  | 1.4527  | 1.5503      |
| C  | 33 - C  | 35        | 1.4064 | 1.3997                              | 1.4111 | 1.4477  | 1.4152  | 1.5028      |
| C  | 33 - C  | 41        | 1.4221 | 1.3282                              | 1.3147 | 1.3460  | 1.3381  | 1.3743      |
| C  | 33 - C  | 48        | 2.8425 | 0.0414                              | 0.0987 | 0.1015  | 0.0757  | 0.1054      |
| C  | 34 - C  | 36        | 1.4008 | 1.3674                              | 1.4050 | 1.4618  | 1.4221  | 1.5223      |

|       |        |    |         |         |         |         |         |        |
|-------|--------|----|---------|---------|---------|---------|---------|--------|
| C     | 34 - H | 37 | 1.0902  | 1.0314  | 0.9288  | 0.9724  | 0.9859  | 0.9137 |
| C     | 35 - C | 43 | 1.3983  | 1.4010  | 1.4374  | 1.4925  | 1.4553  | 1.5522 |
| C     | 35 - C | 46 | 2.7925  | 0.0605  | 0.1095  | 0.1137  | 0.0848  | 0.1183 |
| C     | 36 - H | 40 | 1.0916  | 1.0302  | 0.9275  | 0.9690  | 0.9795  | 0.9070 |
| C     | 38 - C | 41 | 1.4600  | 1.1783  | 1.1068  | 1.1401  | 1.1419  | 1.1242 |
| C     | 38 - C | 42 | 1.4070  | 1.3619  | 1.3386  | 1.3838  | 1.4012  | 1.3888 |
| C     | 39 - C | 42 | 1.3882  | 1.4194  | 1.4743  | 1.5350  | 1.5026  | 1.5922 |
| C     | 39 - H | 45 | 1.0908  | 1.0275  | 0.9233  | 0.9686  | 0.9748  | 0.8976 |
| C     | 41 - C | 43 | 2.7929  | 0.0519  | 0.0912  | 0.0945  | 0.0889  | 0.0967 |
| C     | 41 - C | 46 | 1.4098  | 1.3373  | 1.3391  | 1.3881  | 1.3781  | 1.4210 |
| C     | 42 - H | 47 | 1.0876  | 1.0184  | 0.9210  | 0.9633  | 0.9764  | 0.9015 |
| C     | 43 - H | 44 | 1.0916  | 1.0303  | 0.9272  | 0.9688  | 0.9791  | 0.9062 |
| C     | 43 - C | 48 | 1.4012  | 1.3647  | 1.4020  | 1.4586  | 1.4195  | 1.5186 |
| C     | 46 - C | 48 | 1.3910  | 1.4146  | 1.4681  | 1.5280  | 1.4872  | 1.5916 |
| C     | 46 - H | 49 | 1.0905  | 1.0256  | 0.9269  | 0.9634  | 0.9743  | 0.9100 |
| C     | 48 - H | 50 | 1.0902  | 1.0316  | 0.9286  | 0.9723  | 0.9858  | 0.9133 |
| Sum : |        |    | 73.4184 | 74.0459 | 78.4523 | 78.4523 | 78.4523 |        |

Atomic summation :

|    |    |  |        |        |        |        |        |
|----|----|--|--------|--------|--------|--------|--------|
| C  | 1  |  | 3.9566 | 3.9822 | 4.1564 | 4.1539 | 4.1900 |
| H  | 2  |  | 1.0784 | 0.9777 | 1.0280 | 1.0411 | 0.9394 |
| O  | 3  |  | 2.2886 | 2.5065 | 2.7315 | 2.7360 | 2.7786 |
| C  | 4  |  | 3.9805 | 3.9549 | 4.1435 | 4.1050 | 4.1469 |
| C  | 5  |  | 3.9282 | 3.9759 | 4.1492 | 4.1283 | 4.1985 |
| O  | 6  |  | 1.9564 | 1.8657 | 2.3644 | 2.6187 | 2.5741 |
| C  | 7  |  | 3.4174 | 3.6678 | 3.9619 | 3.9036 | 3.9194 |
| N  | 8  |  | 3.2111 | 3.4952 | 3.6991 | 3.7036 | 3.7681 |
| O  | 9  |  | 2.2765 | 2.5017 | 2.7313 | 2.7381 | 2.7818 |
| O  | 10 |  | 3.9640 | 3.9863 | 4.1456 | 4.1396 | 4.1539 |
| O  | 11 |  | 2.2891 | 2.5074 | 2.7329 | 2.7376 | 2.7803 |
| H  | 12 |  | 1.0400 | 0.9799 | 1.0250 | 1.0360 | 0.9592 |
| C  | 13 |  | 3.3808 | 3.6235 | 3.9138 | 3.8596 | 3.8659 |
| C  | 14 |  | 4.1127 | 4.0023 | 4.1546 | 4.1478 | 4.1582 |
| C  | 15 |  | 3.4192 | 3.6649 | 3.9618 | 3.9036 | 3.9206 |
| Ru | 16 |  | 4.5754 | 4.6150 | 5.1563 | 5.2368 | 4.9643 |
| H  | 17 |  | 1.0657 | 0.9847 | 1.0264 | 1.0383 | 0.9453 |
| Ru | 18 |  | 4.5278 | 4.5945 | 5.1429 | 5.2218 | 4.9478 |
| C  | 19 |  | 4.0256 | 4.0196 | 4.1445 | 4.1318 | 4.1914 |
| C  | 20 |  | 3.4031 | 3.6270 | 3.9156 | 3.8543 | 3.8813 |
| C  | 21 |  | 3.7750 | 3.9617 | 4.1268 | 4.0826 | 4.2125 |
| C  | 22 |  | 3.9965 | 3.9717 | 4.1539 | 4.1204 | 4.1646 |
| Cl | 23 |  | 1.3600 | 1.1706 | 1.4015 | 1.4344 | 1.5325 |
| H  | 24 |  | 1.0378 | 0.9872 | 1.0262 | 1.0345 | 0.9681 |
| C  | 25 |  | 1.0451 | 0.9749 | 1.0254 | 1.0379 | 0.9553 |
| C  | 26 |  | 3.9649 | 3.9926 | 4.1499 | 4.1434 | 4.2003 |
| O  | 27 |  | 2.2705 | 2.4940 | 2.7246 | 2.7358 | 2.7859 |
| N  | 28 |  | 3.2063 | 3.4843 | 3.6909 | 3.6970 | 3.7608 |
| H  | 29 |  | 1.0722 | 0.9840 | 1.0258 | 1.0353 | 0.9634 |
| C  | 30 |  | 3.9545 | 3.9825 | 4.1563 | 4.1539 | 4.1885 |
| C  | 31 |  | 4.0038 | 3.9885 | 4.1296 | 4.1214 | 4.1925 |
| H  | 32 |  | 1.0698 | 0.9840 | 1.0258 | 1.0353 | 0.9635 |
| C  | 33 |  | 3.7716 | 3.9600 | 4.1281 | 4.0837 | 4.2114 |
| C  | 34 |  | 3.9579 | 3.9859 | 4.1534 | 4.1460 | 4.2227 |
| C  | 35 |  | 4.0075 | 3.9886 | 4.1299 | 4.1219 | 4.1917 |
| C  | 36 |  | 3.9744 | 3.9854 | 4.1491 | 4.1348 | 4.2110 |
| H  | 37 |  | 1.0435 | 0.9808 | 1.0268 | 1.0369 | 0.9637 |
| C  | 38 |  | 4.1096 | 4.0015 | 4.1549 | 4.1484 | 4.1573 |
| C  | 39 |  | 3.9299 | 3.9751 | 4.1493 | 4.1281 | 4.1962 |
| H  | 40 |  | 1.0401 | 0.9799 | 1.0238 | 1.0350 | 0.9573 |
| C  | 41 |  | 4.0271 | 4.0191 | 4.1450 | 4.1324 | 4.1908 |
| C  | 42 |  | 3.9643 | 3.9860 | 4.1451 | 4.1383 | 4.1504 |
| C  | 43 |  | 3.9746 | 3.9850 | 4.1486 | 4.1339 | 4.2090 |
| H  | 44 |  | 1.0401 | 0.9796 | 1.0236 | 1.0350 | 0.9566 |
| H  | 45 |  | 1.0368 | 0.9756 | 1.0235 | 1.0378 | 0.9469 |
| C  | 46 |  | 3.9647 | 3.9927 | 4.1502 | 4.1436 | 4.2002 |
| H  | 47 |  | 1.0419 | 0.9794 | 1.0247 | 1.0360 | 0.9577 |
| C  | 48 |  | 3.9581 | 3.9857 | 4.1534 | 4.1459 | 4.2215 |
| H  | 49 |  | 1.0380 | 0.9872 | 1.0262 | 1.0345 | 0.9680 |
| H  | 50 |  | 1.0438 | 0.9806 | 1.0268 | 1.0369 | 0.9633 |
| H  | 51 |  | 1.0361 | 0.9762 | 1.0236 | 1.0375 | 0.9481 |
| H  | 52 |  | 1.0449 | 0.9750 | 1.0254 | 1.0377 | 0.9557 |
| H  | 53 |  | 1.1783 | 0.9039 | 1.1516 | 1.0529 | 1.1722 |

(\*) Values from:

- Mayer bond-order analysis
  - Gopinatan-Jug bond order analysis
  - Nalewajski-Mrozek bond order analysis
  - a) N-M (1) - bond-orders calculated from two-electron valence indices based on partitioning of  $\text{tr}(\Delta_P^2)$  (3-index set)
  - b) N-M (2) - bond-orders calculated from two-electron valence indices based on partitioning of  $\text{tr}(\Delta_P^2)$  (4-index set)
  - c) N-M (3) - bond-orders calculated from valence indices based on partitioning of  $\text{tr}(P^*\Delta_P)$
- A. Michalak, R.L. DeKock, T. Ziegler, J. Comp. Chem., subm. and original articles by Nalewajski et al. )

=====  
 No memory problems found  
 =====

Maximum number of active allocate calls: 7993

\*\*\*\*\*

A D F E X I T

NORMAL TERMINATION

\*\*\*\*\* NBO 5.0 \*\*\*\*\*  
 NATURAL ATOMIC ORBITAL AND  
 NATURAL BOND ORBITAL ANALYSIS

\*\*\*\*\*  
 (c) Copyright 1996-2003 Board of Regents of the University of Wisconsin System  
 on behalf of the Theoretical Chemistry Institute. All Rights Reserved.

Cite this program as:



Electronic Supplementary Information for Dalton Transactions  
This journal is © The Royal Society of Chemistry 2009

NBO 5.0. E. D. Glendening, J. K. Badenhoop, A. E. Reed,  
J. E. Carpenter, J. A. Bohmann, C. M. Morales, and F. Weinhold  
(Theoretical Chemistry Institute, University of Wisconsin,  
Madison, WI, 2001); <http://www.chem.wisc.edu/~nbo5>

```
/3CBOND / : Search for 3-center bonds
/NLMO / : Form Natural Localized Molecular Orbitals
/NRT / : Natural Resonance Theory Analysis
/AONBO / : Write the AO to NBO transformation to LFN 37
/AONLMO / : Write the AO to NLMO transformation to LFN 39
/NAOMO / : Print core and valence MOs in the NAO basis
/NBONLMO / : Write the NBO to NLMO transformation to LFN 49
/NLMOMO / : Write the NLMO to MO transformation to LFN 49
/STERIC / : Print NBO/NLMO steric analysis
/CMO / : Print analysis of canonical MOs
/FILE / : Set to nbodata
```

Job title: \*\*\*equatorial-OH

Storage needed: 4369259 in NPA, 3495107 in NBO,  
3496903 in NLMO ( 10000000 available)

Atom distance matrix: (Angstroms)

| Atom   | 1       | 2      | 3       | 4       | 5       | 6      | 7      | 8       |
|--------|---------|--------|---------|---------|---------|--------|--------|---------|
| 1. C   | 0.0000  | 1.3900 | 1.3991  | 4.8259  | 2.4091  | 4.0272 | 2.7823 | 6.0880  |
| 2. C   | 1.3900  | 0.0000 | 2.3945  | 3.6213  | 2.7425  | 3.4302 | 2.3567 | 5.1938  |
| 3. C   | 1.3991  | 2.3945 | 0.0000  | 5.3412  | 1.3897  | 4.9039 | 2.4213 | 7.1863  |
| 4. C   | 4.8259  | 3.6213 | 5.3412  | 0.0000  | 4.8476  | 5.7528 | 3.6412 | 6.3362  |
| 5. C   | 2.4091  | 2.7425 | 1.3897  | 4.8476  | 0.0000  | 5.2218 | 1.4057 | 7.4656  |
| 6. C   | 4.0272  | 3.4302 | 4.9039  | 5.7528  | 5.2218  | 0.0000 | 4.7664 | 2.6164  |
| 7. C   | 2.7823  | 2.3567 | 2.4213  | 3.6412  | 1.4057  | 4.7664 | 0.0000 | 6.7320  |
| 8. C   | 6.0880  | 5.1938 | 7.1863  | 6.3362  | 7.4656  | 2.6164 | 6.7320 | 0.0000  |
| 9. C   | 4.2387  | 3.6444 | 3.8004  | 3.6229  | 2.5526  | 5.6394 | 1.4617 | 7.3872  |
| 10. C  | 6.2932  | 4.9596 | 6.7652  | 2.6241  | 6.0740  | 5.5694 | 4.6779 | 5.6848  |
| 11. C  | 4.9733  | 4.0215 | 4.8714  | 2.8269  | 3.7917  | 5.6628 | 2.4596 | 6.9503  |
| 12. C  | 7.5225  | 6.2102 | 8.3819  | 5.1641  | 8.1002  | 4.9964 | 6.8812 | 3.6290  |
| 13. C  | 5.1965  | 4.8614 | 4.4252  | 4.8660  | 3.0390  | 6.7757 | 2.5152 | 8.6579  |
| 14. C  | 8.8482  | 7.5151 | 9.6557  | 6.0454  | 9.2768  | 6.3277 | 7.9995 | 4.8361  |
| 15. C  | 6.3584  | 5.4263 | 6.1544  | 3.6753  | 4.9645  | 6.8477 | 3.7395 | 7.9525  |
| 16. C  | 6.6431  | 5.8181 | 7.2954  | 6.9439  | 7.2062  | 2.8646 | 6.4506 | 2.8352  |
| 17. C  | 6.5321  | 6.0687 | 5.8131  | 5.4003  | 4.4288  | 7.7736 | 3.7844 | 9.4562  |
| 18. C  | 6.8678  | 6.2965 | 7.4017  | 7.9613  | 7.4052  | 3.1273 | 6.8804 | 3.6821  |
| 19. C  | 7.0227  | 6.2978 | 6.5492  | 4.8957  | 5.2231  | 7.8026 | 4.2546 | 9.1376  |
| 20. C  | 7.9994  | 8.8683 | 8.6928  | 6.6834  | 8.3764  | 4.6871 | 7.2971 | 3.6485  |
| 21. C  | 9.6517  | 8.3683 | 10.3730 | 7.1318  | 9.9339  | 6.7907 | 8.6818 | 5.3562  |
| 22. C  | 7.8100  | 6.8587 | 8.4211  | 7.3579  | 8.1724  | 4.1943 | 7.2668 | 3.6327  |
| 23. C  | 9.2707  | 8.0819 | 9.9352  | 7.4064  | 9.5227  | 6.0861 | 8.3634 | 4.8591  |
| 24. C  | 8.1287  | 7.5990 | 8.5431  | 9.1404  | 8.4610  | 4.5105 | 7.9597 | 4.9017  |
| 25. C  | 8.9432  | 8.0768 | 9.4427  | 8.6294  | 9.1425  | 5.3113 | 8.2999 | 4.8752  |
| 26. C  | 9.0874  | 8.4043 | 9.5002  | 9.4427  | 9.2747  | 5.4450 | 8.6130 | 5.4073  |
| 27. H  | 2.1877  | 1.0909 | 3.4099  | 3.5653  | 3.8306  | 3.0970 | 3.3059 | 4.4002  |
| 28. H  | 3.3994  | 3.8301 | 2.1540  | 5.6266  | 1.0878  | 6.1289 | 2.1616 | 8.4408  |
| 29. H  | 6.9532  | 5.6131 | 7.8910  | 4.4005  | 7.6818  | 4.8771 | 6.4714 | 3.5917  |
| 30. H  | 5.1046  | 5.0651 | 4.0893  | 5.6524  | 2.7358  | 7.0553 | 2.7568 | 9.1540  |
| 31. H  | 9.3481  | 7.9822 | 10.1799 | 6.0918  | 9.7901  | 7.1353 | 8.4771 | 5.5895  |
| 32. H  | 6.2386  | 5.8524 | 6.7744  | 7.9890  | 6.9383  | 2.6463 | 6.5945 | 3.7485  |
| 33. H  | 7.0911  | 6.0256 | 7.0391  | 3.7442  | 5.9243  | 7.2070 | 4.6253 | 7.9643  |
| 34. H  | 7.3397  | 7.0046 | 6.4790  | 6.4516  | 5.0932  | 8.6900 | 4.6691 | 10.4585 |
| 35. H  | 8.1118  | 7.3612 | 7.6331  | 5.6907  | 6.2970  | 8.7436 | 5.3460 | 9.9480  |
| 36. H  | 8.4966  | 8.1285 | 8.8278  | 9.9603  | 8.8103  | 5.0590 | 8.4647 | 5.6954  |
| 37. H  | 10.6978 | 9.4001 | 11.3935 | 7.9396  | 10.9025 | 7.8770 | 9.6226 | 6.3966  |
| 38. H  | 10.0749 | 8.9386 | 10.6712 | 8.3765  | 10.2242 | 6.7653 | 9.1036 | 5.6372  |
| 39. H  | 9.8516  | 8.9160 | 10.3355 | 9.1151  | 9.9515  | 6.2984 | 9.0296 | 5.6618  |
| 40. H  | 10.0757 | 9.4312 | 10.4216 | 10.4441 | 10.1602 | 6.4914 | 9.5305 | 6.4576  |
| 41. H  | 2.1666  | 3.3913 | 1.0909  | 6.3805  | 2.1540  | 5.6418 | 3.4114 | 7.9985  |
| 42. H  | 1.0889  | 2.1516 | 2.1785  | 5.5828  | 3.4082  | 4.2023 | 3.8705 | 6.1319  |
| 43. H  | 5.0340  | 3.7314 | 6.1090  | 3.2959  | 6.1275  | 3.7808 | 5.0838 | 3.2710  |
| 44. O  | 5.4156  | 4.3499 | 5.9143  | 1.1657  | 5.4848  | 6.7564 | 4.4229 | 7.2319  |
| 45. O  | 4.2985  | 2.9810 | 5.3046  | 3.1681  | 5.2886  | 3.0383 | 4.2648 | 3.1801  |
| 46. O  | 3.7282  | 3.5513 | 4.5414  | 6.4583  | 5.0910  | 1.1654 | 4.9554 | 3.4962  |
| 47. O  | 6.8470  | 6.0454 | 8.0249  | 7.2275  | 8.4296  | 3.5205 | 7.7639 | 1.1657  |
| 48. O  | 7.4589  | 6.1237 | 7.9081  | 3.5113  | 7.1607  | 6.5472 | 5.7564 | 6.3736  |
| 49. N  | 2.3948  | 1.3469 | 2.7703  | 2.8880  | 2.3913  | 3.8676 | 1.3646 | 5.5702  |
| 50. N  | 7.0416  | 5.8314 | 7.8487  | 5.5276  | 7.6039  | 4.0287 | 6.4865 | 2.8904  |
| 51. Ru | 4.4246  | 3.1127 | 4.9156  | 1.8633  | 4.3402  | 4.3435 | 2.9933 | 5.1465  |
| 52. Ru | 5.1831  | 4.1526 | 6.0585  | 5.1573  | 6.0606  | 1.8750 | 5.1938 | 1.8649  |
| 53. Cl | 4.9708  | 3.9313 | 5.3227  | 4.3637  | 4.7721  | 3.2085 | 3.6928 | 4.3587  |

| Atom  | 9      | 10     | 11     | 12     | 13     | 14      | 15     | 16     |
|-------|--------|--------|--------|--------|--------|---------|--------|--------|
| 1. C  | 4.2387 | 6.2932 | 4.9733 | 7.5225 | 5.1965 | 8.8482  | 6.3584 | 6.6431 |
| 2. C  | 3.6444 | 4.9596 | 4.0215 | 6.2102 | 4.8614 | 7.5151  | 5.4263 | 5.8181 |
| 3. C  | 3.8004 | 6.7652 | 4.8714 | 8.3819 | 4.4252 | 9.6557  | 6.1544 | 7.2954 |
| 4. C  | 3.6229 | 2.6241 | 2.8269 | 5.1641 | 4.8660 | 6.0454  | 3.6753 | 6.9439 |
| 5. C  | 2.5526 | 6.0740 | 3.7917 | 8.1002 | 3.0390 | 9.2768  | 4.9645 | 7.2062 |
| 6. C  | 5.6394 | 5.5694 | 5.6628 | 4.9964 | 6.7757 | 6.3277  | 6.8477 | 2.8646 |
| 7. C  | 1.4617 | 4.6779 | 2.4596 | 6.8812 | 2.5152 | 7.9995  | 3.7395 | 6.4506 |
| 8. C  | 7.3872 | 5.6848 | 6.9503 | 3.6290 | 8.6579 | 4.8361  | 7.9525 | 2.8352 |
| 9. C  | 0.0000 | 4.1886 | 1.4232 | 6.8523 | 1.4090 | 7.7882  | 2.4191 | 6.7609 |
| 10. C | 4.1886 | 0.0000 | 2.8616 | 3.3517 | 5.3070 | 3.9503  | 3.1332 | 5.5841 |
| 11. C | 1.4232 | 2.8616 | 0.0000 | 5.7940 | 2.4609 | 6.6038  | 1.4058 | 6.3856 |
| 12. C | 6.8523 | 3.3517 | 5.7940 | 0.0000 | 8.0647 | 1.3887  | 6.2538 | 4.0264 |
| 13. C | 1.4090 | 3.3070 | 2.4609 | 8.0647 | 0.0000 | 8.9133  | 2.7923 | 7.7508 |
| 14. C | 7.7882 | 3.9503 | 6.6038 | 1.3887 | 8.9133 | 0.0000  | 6.8057 | 4.9783 |
| 15. C | 2.4191 | 3.1332 | 1.4058 | 6.2538 | 2.7923 | 6.8057  | 0.0000 | 7.1382 |
| 16. C | 6.7609 | 5.5841 | 6.3856 | 4.0264 | 7.7508 | 4.9783  | 7.1382 | 0.0000 |
| 17. C | 2.4321 | 5.4458 | 2.8424 | 8.3771 | 1.3916 | 9.0397  | 2.4307 | 8.3568 |
| 18. C | 7.2930 | 6.7808 | 7.1572 | 5.4316 | 8.1485 | 6.3624  | 7.9494 | 1.4064 |
| 19. C | 2.7936 | 4.5164 | 2.4458 | 7.5583 | 2.4099 | 8.0662  | 1.3988 | 8.0785 |
| 20. C | 7.2424 | 4.5165 | 6.4024 | 2.3483 | 8.2696 | 2.7821  | 6.8095 | 2.4566 |
| 21. C | 8.3830 | 4.8074 | 7.2367 | 2.3907 | 9.3938 | 1.3993  | 7.3143 | 4.8722 |
| 22. C | 7.3283 | 5.5414 | 6.7344 | 3.6411 | 8.2646 | 4.2376  | 7.2438 | 1.4221 |
| 23. C | 8.1315 | 5.0075 | 7.1420 | 2.7322 | 9.0919 | 2.4054  | 7.3125 | 3.7870 |
| 24. C | 8.2340 | 7.7302 | 8.0923 | 6.2981 | 8.9466 | 7.0211  | 8.7305 | 2.4457 |
| 25. C | 8.2640 | 6.6800 | 7.7265 | 4.8542 | 9.0546 | 5.1891  | 8.0987 | 2.4613 |
| 26. C | 8.6847 | 7.6892 | 8.3518 | 6.0636 | 9.3726 | 6.5254  | 8.7994 | 2.8425 |
| 27. H | 4.4367 | 4.7982 | 4.5183 | 5.5753 | 5.7463 | 6.9100  | 5.8865 | 5.4935 |
| 28. H | 2.8093 | 6.7625 | 4.2047 | 8.9613 | 2.7525 | 10.0848 | 5.1677 | 7.9471 |
| 29. H | 6.5502 | 3.0570 | 5.5106 | 1.0888 | 7.8430 | 2.1635  | 6.0981 | 4.5529 |
| 30. H | 2.1734 | 6.2917 | 3.4493 | 8.9114 | 1.0905 | 8.8297  | 3.8828 | 8.2366 |
| 31. H | 8.2234 | 4.1491 | 6.9628 | 2.1512 | 9.3560 | 1.0886  | 7.0874 | 6.0157 |
| 32. H | 7.1987 | 7.1538 | 2.2473 | 6.0344 | 8.0525 | 7.0979  | 8.1775 | 2.1703 |
| 33. H | 3.4183 | 2.6592 | 2.1700 | 5.7940 | 3.8823 | 6.1591  | 1.0905 | 7.2102 |

Electronic Supplementary Information for Dalton Transactions  
This journal is © The Royal Society of Chemistry 2009

|     |    |        |        |        |        |         |         |        |        |
|-----|----|--------|--------|--------|--------|---------|---------|--------|--------|
| 34. | H  | 3.4210 | 6.4926 | 3.9325 | 9.4028 | 2.1569  | 10.0256 | 3.4199 | 9.2257 |
| 35. | H  | 3.8852 | 5.0682 | 3.4275 | 8.0775 | 3.4004  | 8.4212  | 2.1576 | 8.7806 |
| 36. | H  | 8.8033 | 8.6787 | 8.8066 | 7.3623 | 9.4250  | 8.1103  | 9.4724 | 3.4276 |
| 37. | H  | 9.2278 | 5.5508 | 8.0260 | 3.3885 | 10.1783 | 2.1674  | 7.9555 | 5.8671 |
| 38. | H  | 8.8162 | 6.0113 | 7.8732 | 3.8196 | 9.6763  | 3.3959  | 7.9540 | 4.1929 |
| 39. | H  | 8.8618 | 6.9547 | 8.2002 | 5.0544 | 9.6057  | 5.0934  | 8.4113 | 3.4500 |
| 40. | H  | 9.5372 | 8.6065 | 9.2209 | 6.9975 | 10.1290 | 7.3303  | 9.5774 | 3.9326 |
| 41. | H  | 4.6993 | 7.8523 | 5.8682 | 9.4169 | 5.1073  | 10.7055 | 7.0989 | 8.0927 |
| 42. | H  | 5.3252 | 7.0981 | 6.0108 | 7.9908 | 6.2756  | 9.3513  | 7.4060 | 6.9979 |
| 43. | H  | 5.5576 | 3.3239 | 4.8481 | 3.0254 | 6.9559  | 4.2796  | 5.8428 | 4.7767 |
| 44. | O  | 4.4079 | 3.5284 | 3.7150 | 6.0063 | 5.5171  | 6.7897  | 4.3829 | 8.0532 |
| 45. | O  | 4.8069 | 3.2084 | 4.2364 | 3.3256 | 6.1973  | 4.6526  | 5.3405 | 4.2729 |
| 46. | O  | 6.0070 | 6.5619 | 6.2821 | 6.1571 | 7.0385  | 7.4907  | 7.5280 | 3.7200 |
| 47. | O  | 8.4870 | 6.6807 | 8.0579 | 4.3426 | 9.7741  | 5.4110  | 9.0700 | 3.7271 |
| 48. | O  | 5.1054 | 1.1670 | 3.7055 | 3.4415 | 6.0778  | 3.6087  | 3.5659 | 6.1728 |
| 49. | N  | 2.3823 | 4.0116 | 2.6816 | 5.8450 | 3.6980  | 7.0446  | 4.0873 | 5.7155 |
| 50. | N  | 6.5508 | 3.7653 | 5.6795 | 1.3469 | 7.7199  | 2.4035  | 6.2525 | 2.6851 |
| 51. | Ru | 2.9550 | 1.8742 | 2.0767 | 4.1424 | 4.3061  | 5.1688  | 3.1485 | 5.2265 |
| 52. | Ru | 5.6812 | 4.2952 | 5.2373 | 3.1475 | 6.9034  | 4.4578  | 6.2107 | 2.0698 |
| 53. | Cl | 3.6709 | 3.2004 | 3.2030 | 3.9753 | 4.7162  | 5.0180  | 4.0199 | 3.1939 |

| Atom | 17 | 18      | 19     | 20      | 21     | 22      | 23     | 24      |         |
|------|----|---------|--------|---------|--------|---------|--------|---------|---------|
| 1.   | C  | 6.5321  | 6.8678 | 7.0227  | 7.9994 | 9.6517  | 7.8100 | 9.2707  | 8.1287  |
| 2.   | C  | 6.0687  | 6.2965 | 6.2978  | 6.8683 | 8.3683  | 6.8587 | 8.0819  | 7.5990  |
| 3.   | C  | 5.8131  | 7.4017 | 6.5492  | 8.6928 | 10.3730 | 8.4211 | 9.9352  | 8.5431  |
| 4.   | C  | 5.4003  | 7.9613 | 4.8957  | 6.6834 | 7.1318  | 7.3579 | 7.4064  | 9.1404  |
| 5.   | C  | 4.4288  | 7.4052 | 5.2231  | 8.3764 | 9.9339  | 8.1724 | 9.5227  | 8.4610  |
| 6.   | C  | 7.7736  | 3.1273 | 7.8026  | 4.6871 | 6.7907  | 4.1943 | 6.0861  | 4.5105  |
| 7.   | C  | 3.7844  | 6.8804 | 4.2546  | 7.2971 | 8.6818  | 7.2668 | 8.3634  | 7.9597  |
| 8.   | C  | 9.4562  | 3.6821 | 9.1376  | 3.6485 | 5.3562  | 3.6327 | 4.8591  | 4.9017  |
| 9.   | C  | 2.4321  | 7.2930 | 2.7936  | 7.2424 | 8.3830  | 7.3283 | 8.1315  | 8.2340  |
| 10.  | C  | 5.4458  | 6.7808 | 4.5164  | 4.6545 | 4.8074  | 5.5414 | 5.1075  | 7.7302  |
| 11.  | C  | 2.8424  | 7.1572 | 2.4458  | 6.4024 | 7.2367  | 6.7344 | 7.1420  | 8.0923  |
| 12.  | C  | 8.3771  | 5.4316 | 7.5583  | 2.3483 | 2.3907  | 3.6411 | 2.7322  | 6.2981  |
| 13.  | C  | 1.3916  | 8.1485 | 2.4099  | 8.2696 | 9.3938  | 8.2646 | 9.0919  | 8.9466  |
| 14.  | C  | 9.0397  | 6.3624 | 8.0662  | 2.7821 | 1.3993  | 4.2376 | 2.4054  | 7.0211  |
| 15.  | C  | 2.4307  | 7.9494 | 1.3988  | 6.8095 | 7.3143  | 7.2438 | 7.3125  | 8.7305  |
| 16.  | C  | 8.3568  | 1.4064 | 8.0785  | 2.4566 | 4.8722  | 1.4221 | 3.7870  | 2.4457  |
| 17.  | C  | 0.0000  | 8.8284 | 1.4008  | 8.5625 | 9.4282  | 8.6586 | 9.2001  | 9.5035  |
| 18.  | C  | 8.8284  | 0.0000 | 8.7376  | 3.7370 | 6.1529  | 2.4185 | 4.9583  | 1.3983  |
| 19.  | C  | 1.4008  | 8.7376 | 0.0000  | 7.8911 | 8.4529  | 8.1879 | 8.3670  | 9.4042  |
| 20.  | C  | 8.5625  | 3.7370 | 7.8911  | 0.0000 | 2.4240  | 1.4600 | 1.4070  | 4.2521  |
| 21.  | C  | 9.4282  | 6.1529 | 8.4529  | 2.4240 | 0.0000  | 3.7969 | 1.3882  | 6.5419  |
| 22.  | C  | 6.6586  | 2.4185 | 8.1879  | 1.4600 | 3.7969  | 0.0000 | 2.5465  | 2.7929  |
| 23.  | C  | 9.2001  | 4.9583 | 8.3670  | 1.4070 | 1.3882  | 2.5465 | 0.0000  | 5.2138  |
| 24.  | C  | 9.5035  | 1.3983 | 9.4042  | 4.2521 | 6.5419  | 2.7929 | 5.2138  | 0.0000  |
| 25.  | C  | 9.3479  | 2.7925 | 8.8992  | 2.5145 | 4.4137  | 1.4098 | 3.0283  | 2.4098  |
| 26.  | C  | 9.7481  | 2.4308 | 9.4790  | 3.7825 | 5.8010  | 2.4317 | 4.4174  | 1.4012  |
| 27.  | H  | 6.8634  | 6.1007 | 6.9165  | 6.4186 | 7.8417  | 6.5155 | 7.6261  | 7.4633  |
| 28.  | H  | 4.0968  | 8.0591 | 5.1305  | 9.1241 | 10.6738 | 8.8667 | 10.2299 | 9.0081  |
| 29.  | H  | 8.2441  | 5.9244 | 7.4635  | 3.3090 | 3.3926  | 4.4543 | 3.8200  | 6.9464  |
| 30.  | H  | 2.1460  | 8.4759 | 3.3958  | 9.0105 | 10.2967 | 8.8700 | 9.9125  | 9.2573  |
| 31.  | H  | 9.4261  | 7.4100 | 8.3721  | 3.8699 | 2.1797  | 5.3237 | 3.4057  | 8.1035  |
| 32.  | H  | 8.8765  | 1.0904 | 8.9339  | 4.6225 | 7.0398  | 3.4175 | 5.9189  | 2.1434  |
| 33.  | H  | 3.4060  | 8.1574 | 2.1438  | 6.5052 | 6.6667  | 7.1302 | 6.8252  | 8.9048  |
| 34.  | H  | 1.0902  | 9.6071 | 2.1679  | 9.4787 | 10.3457 | 9.5099 | 10.0824 | 10.1934 |
| 35.  | H  | 2.1632  | 9.4664 | 1.0916  | 8.3830 | 8.7205  | 8.7430 | 8.6993  | 10.0363 |
| 36.  | H  | 10.0266 | 2.1571 | 10.0514 | 5.3435 | 7.6252  | 3.8845 | 6.2874  | 1.0916  |
| 37.  | H  | 10.0976 | 7.0945 | 9.0410  | 3.4144 | 1.0908  | 4.6941 | 2.1541  | 7.3547  |
| 38.  | H  | 9.7157  | 5.1528 | 8.8988  | 2.1610 | 2.1518  | 2.7972 | 1.0876  | 5.1118  |
| 39.  | H  | 9.7600  | 3.8830 | 9.1929  | 2.7582 | 4.0740  | 2.1750 | 2.7248  | 3.3953  |
| 40.  | H  | 10.4294 | 3.4198 | 10.1680 | 4.6676 | 6.4639  | 3.4208 | 5.0809  | 2.1682  |
| 41.  | H  | 6.4918  | 8.0539 | 7.3661  | 9.6411 | 11.3993 | 9.2751 | 10.9113 | 9.1455  |
| 42.  | H  | 7.6178  | 7.1429 | 8.1053  | 8.4789 | 10.1811 | 8.2446 | 9.7885  | 8.4293  |
| 43.  | H  | 7.6637  | 5.9159 | 7.1768  | 4.6093 | 5.4109  | 5.2811 | 5.5393  | 7.1883  |
| 44.  | O  | 5.9880  | 9.0829 | 5.4873  | 7.7099 | 7.9565  | 8.4553 | 8.3606  | 10.2816 |
| 45.  | O  | 6.9809  | 5.3139 | 6.6109  | 4.4746 | 5.6279  | 4.9320 | 5.5504  | 6.6108  |
| 46.  | O  | 8.1523  | 3.5773 | 8.3663  | 5.7697 | 7.9335  | 5.1203 | 7.1758  | 4.8664  |
| 47.  | O  | 10.5978 | 4.3973 | 10.2765 | 4.4277 | 5.9203  | 4.4194 | 5.4929  | 5.5008  |
| 48.  | O  | 5.9811  | 7.4289 | 4.8550  | 4.8037 | 4.3933  | 5.8701 | 4.9269  | 8.2556  |
| 49.  | N  | 4.8125  | 6.3053 | 4.9609  | 6.4825 | 7.8412  | 6.5663 | 7.5912  | 7.5131  |
| 50.  | N  | 8.1257  | 4.0913 | 7.4643  | 1.3671 | 2.7817  | 2.3866 | 2.3974  | 4.9647  |
| 51.  | Ru | 4.9038  | 6.2108 | 4.4334  | 5.1564 | 6.0307  | 5.6566 | 6.0208  | 7.3369  |
| 52.  | Ru | 7.6455  | 3.1370 | 7.3390  | 2.9997 | 4.9410  | 2.9550 | 4.3518  | 4.4235  |
| 53.  | Cl | 5.2880  | 4.0061 | 4.9889  | 3.6999 | 5.3558  | 3.6703 | 4.7856  | 4.9794  |

| Atom | 25 | 26      | 27      | 28     | 29      | 30     | 31      | 32      |        |
|------|----|---------|---------|--------|---------|--------|---------|---------|--------|
| 1.   | C  | 8.9432  | 9.0874  | 2.1877 | 3.3994  | 6.9532 | 5.1046  | 9.3481  | 6.2386 |
| 2.   | C  | 8.0768  | 8.4043  | 1.0909 | 3.8301  | 5.6131 | 5.0651  | 7.9822  | 5.8524 |
| 3.   | C  | 9.4427  | 9.5002  | 3.4099 | 2.1540  | 7.8910 | 4.0893  | 10.1799 | 6.7744 |
| 4.   | C  | 8.6294  | 9.4427  | 3.5653 | 5.6266  | 4.4005 | 5.6524  | 6.0918  | 7.9890 |
| 5.   | C  | 9.1425  | 9.2747  | 3.8306 | 1.0878  | 7.6818 | 2.7358  | 9.7901  | 6.9383 |
| 6.   | C  | 5.3113  | 5.4450  | 3.0970 | 6.1289  | 4.8771 | 7.0553  | 7.1353  | 2.6463 |
| 7.   | C  | 8.2999  | 8.6130  | 3.3059 | 2.1616  | 6.4714 | 2.7568  | 8.4771  | 6.5945 |
| 8.   | C  | 4.8752  | 5.4073  | 4.4002 | 8.4408  | 3.5917 | 9.1540  | 5.5895  | 3.7485 |
| 9.   | C  | 8.2691  | 8.6847  | 4.4367 | 2.8093  | 6.5502 | 2.1734  | 8.2234  | 7.1987 |
| 10.  | C  | 6.6800  | 7.6892  | 4.7982 | 6.7625  | 3.0570 | 6.2917  | 4.1491  | 7.1538 |
| 11.  | C  | 7.7265  | 8.3518  | 4.5183 | 4.2047  | 5.5106 | 3.4493  | 6.9628  | 7.2473 |
| 12.  | C  | 4.8542  | 6.0636  | 5.5753 | 8.9613  | 1.0888 | 8.9114  | 2.1512  | 6.0344 |
| 13.  | C  | 9.0546  | 9.3726  | 5.7463 | 2.7525  | 7.8430 | 1.0905  | 9.3560  | 8.0525 |
| 14.  | C  | 5.1891  | 6.5254  | 6.9100 | 10.0848 | 2.1635 | 9.8297  | 1.0886  | 7.0979 |
| 15.  | C  | 8.0987  | 8.7994  | 5.8865 | 5.1677  | 6.0981 | 3.8828  | 7.0874  | 8.1775 |
| 16.  | C  | 2.4613  | 2.8425  | 5.4935 | 7.9471  | 4.5529 | 8.2366  | 6.0157  | 2.1703 |
| 17.  | C  | 9.3479  | 9.7481  | 6.8634 | 4.0968  | 8.2441 | 2.1460  | 9.4261  | 8.8765 |
| 18.  | C  | 2.7925  | 2.4308  | 6.1007 | 8.0591  | 7.9244 | 8.4759  | 7.4100  | 1.0904 |
| 19.  | C  | 8.8992  | 6.9165  | 5.1305 | 9.1241  | 7.4635 | 3.3958  | 8.3721  | 8.9339 |
| 20.  | C  | 2.5145  | 3.7825  | 6.4186 | 9.1241  | 3.3090 | 9.0105  | 3.8699  | 4.6225 |
| 21.  | C  | 4.4137  | 5.8010  | 7.8417 | 10.6738 | 3.3926 | 10.2967 | 2.1797  | 7.0398 |
| 22.  | C  | 1.4098  | 2.4317  | 6.5155 | 8.8667  | 4.4543 | 8.8700  | 5.3237  | 3.4175 |
| 23.  | C  | 3.0283  | 4.4174  | 7.6261 | 10.2299 | 3.8200 | 9.9125  | 3.4057  | 5.9189 |
| 24.  | C  | 2.4098  | 1.4012  | 7.4633 | 9.0081  | 6.9464 | 9.2573  | 8.1035  | 2.1434 |
| 25.  | C  | 0.0000  | 1.3910  | 7.8134 | 9.7385  | 5.7581 | 9.6203  | 6.2678  | 3.8824 |
| 26.  | C  | 1.3910  | 0.0000  | 8.2293 | 9.8048  | 6.8822 | 9.8012  | 7.6106  | 3.4061 |
| 27.  | H  | 7.8134  | 8.2293  | 0.0000 | 4.9176  | 4.8975 | 6.0566  | 7.3438  | 5.7040 |
| 28.  | H  | 9.7385  | 9.8048  | 4.9176 | 0.0000  | 8.5969 | 2.0891  | 10.6058 | 7.6014 |
| 29.  | H  | 5.7581  | 6.8822  | 4.8975 | 8.5969  | 0.0000 | 8.6764  | 2.4980  | 6.3648 |
| 30.  | H  | 9.6203  | 9.8012  | 6.0566 | 2.0891  | 8.6764 | 0.0000  | 10.3129 | 8.2615 |
| 31.  | H  | 6.2678  | 7.6106  | 7.3438 | 10.6058 | 2.4980 | 10.3129 | 0.0000  | 8.1051 |
| 32.  | H  | 7.8824  | 3.4061  | 5.7040 | 7.6014  | 6.3648 | 8.2615  | 8.1051  | 0.0000 |
| 33.  | H  | 7.9811  | 8.8250  | 9.3200 | 6.2082  | 5.6838 | 4.9728  | 6.3420  | 8.5029 |
| 34.  | H  | 10.1026 | 10.4289 | 9.8519 | 4.5564  | 9.3069 | 2.4720  | 10.4181 | 9.6433 |
| 35.  | H  | 9.3604  | 9.9851  | 7.9396 | 6.1480  | 8.0526 | 4.2977  | 8.6701  | 9.7456 |
| 36.  | H  | 3.4001  | 2.1634  | 8.0636 | 9.2895  | 7.9721 | 9.6247  | 9.1915  | 2.4555 |
| 37.  | H  | 5.0921  | 6.4750  | 8.8827 | 11.6105 | 4.3117 | 11.1149 | 2.5278  | 8.0246 |

Electronic Supplementary Information for Dalton Transactions  
This journal is © The Royal Society of Chemistry 2009

|     |    |         |         |        |         |        |         |         |        |
|-----|----|---------|---------|--------|---------|--------|---------|---------|--------|
| 38. | H  | 2.7327  | 4.0758  | 8.5377 | 10.8716 | 4.9071 | 10.4720 | 4.3159  | 6.1941 |
| 39. | H  | 1.0905  | 2.1448  | 8.6395 | 10.5220 | 6.0590 | 10.2383 | 6.1243  | 4.9728 |
| 40. | H  | 2.1563  | 1.0902  | 9.2930 | 10.6249 | 7.8672 | 10.5342 | 8.4018  | 4.3030 |
| 41. | H  | 10.2390 | 10.1838 | 4.3328 | 2.4848  | 8.9334 | 4.5691  | 11.2468 | 7.3325 |
| 42. | H  | 9.3855  | 9.4712  | 2.5326 | 4.3176  | 7.3856 | 6.1362  | 9.8473  | 6.4123 |
| 43. | H  | 6.6873  | 7.5256  | 2.8827 | 7.1403  | 2.1362 | 7.6315  | 4.5814  | 5.9897 |
| 44. | O  | 9.7417  | 10.5829 | 4.2741 | 6.2090  | 5.1551 | 6.2565  | 6.6754  | 9.0835 |
| 45. | O  | 6.3184  | 7.0454  | 2.2593 | 6.2943  | 2.6611 | 6.8226  | 5.1081  | 5.3194 |
| 46. | O  | 6.0941  | 5.9956  | 3.3895 | 5.9489  | 6.0011 | 7.1421  | 8.2925  | 2.7708 |
| 47. | O  | 5.5288  | 5.9999  | 5.1698 | 9.4271  | 4.2758 | 10.2461 | 6.0797  | 4.4088 |
| 48. | O  | 6.8975  | 8.0241  | 5.9278 | 7.7880  | 3.3208 | 7.1169  | 3.6273  | 7.9278 |
| 49. | N  | 7.7392  | 8.1600  | 2.0564 | 3.3740  | 5.3340 | 4.0947  | 7.5021  | 6.0405 |
| 50. | N  | 3.7026  | 4.8165  | 5.2794 | 8.4414  | 2.0686 | 8.4756  | 3.3771  | 4.7352 |
| 51. | Ru | 6.8826  | 7.6347  | 3.1113 | 5.1480  | 3.6614 | 5.1166  | 5.5322  | 6.3068 |
| 52. | Ru | 4.3056  | 4.8984  | 3.6320 | 6.9668  | 3.1830 | 7.4464  | 5.2970  | 3.3033 |
| 53. | Cl | 4.7192  | 5.2865  | 4.0073 | 5.4507  | 4.0887 | 5.3704  | 5.8000  | 4.2513 |

| Atom | 33 | 34     | 35      | 36      | 37      | 38      | 39      | 40      |         |
|------|----|--------|---------|---------|---------|---------|---------|---------|---------|
| 1.   | C  | 7.0911 | 7.3397  | 8.1118  | 8.4966  | 10.6978 | 10.0749 | 9.8516  | 10.0757 |
| 2.   | C  | 6.0256 | 7.0046  | 7.3612  | 8.1285  | 9.4001  | 8.9386  | 8.9160  | 9.4312  |
| 3.   | C  | 7.0391 | 6.4790  | 7.6331  | 8.8278  | 11.3935 | 10.6712 | 10.3355 | 10.4216 |
| 4.   | C  | 3.7442 | 6.4516  | 5.6907  | 9.9603  | 7.9396  | 8.3765  | 9.1151  | 10.4441 |
| 5.   | C  | 5.9243 | 5.0932  | 6.2970  | 8.8103  | 10.9025 | 10.2242 | 9.9515  | 10.1602 |
| 6.   | C  | 7.2070 | 8.6900  | 8.7436  | 5.0590  | 7.8770  | 6.7653  | 6.2984  | 6.4914  |
| 7.   | C  | 4.6253 | 4.6691  | 5.3460  | 8.4647  | 9.6226  | 9.1036  | 9.0296  | 9.5305  |
| 8.   | C  | 7.9643 | 10.4585 | 9.9480  | 5.6954  | 6.3966  | 5.6372  | 5.6618  | 6.4576  |
| 9.   | C  | 3.4183 | 3.4210  | 3.8852  | 8.8033  | 9.2278  | 8.8162  | 8.8618  | 9.5372  |
| 10.  | C  | 2.6592 | 6.4926  | 5.0682  | 8.6787  | 5.5508  | 6.0113  | 6.9547  | 8.6065  |
| 11.  | C  | 2.1700 | 3.9325  | 3.4275  | 8.8066  | 8.0260  | 7.8732  | 8.2002  | 9.2209  |
| 12.  | C  | 5.7940 | 9.4028  | 8.0775  | 7.3623  | 3.3885  | 3.8196  | 5.0544  | 6.9975  |
| 13.  | C  | 3.8823 | 2.1569  | 3.4004  | 9.4250  | 10.1783 | 9.6763  | 9.6057  | 10.1290 |
| 14.  | C  | 6.1591 | 10.0256 | 8.4212  | 8.1103  | 2.1674  | 3.3959  | 5.0934  | 7.3303  |
| 15.  | C  | 1.0905 | 3.4199  | 2.1576  | 9.4724  | 7.9555  | 7.9540  | 8.4113  | 9.5774  |
| 16.  | C  | 7.2102 | 9.2257  | 8.7806  | 3.4276  | 5.8671  | 4.1929  | 3.4500  | 3.9326  |
| 17.  | C  | 3.4060 | 1.0902  | 2.1632  | 10.0266 | 10.0976 | 9.7157  | 9.7600  | 10.4294 |
| 18.  | C  | 8.1574 | 9.6071  | 9.4664  | 2.1571  | 7.0945  | 5.1528  | 3.8830  | 3.4198  |
| 19.  | C  | 2.1438 | 2.1679  | 1.0916  | 10.0514 | 9.0410  | 8.8988  | 9.1929  | 10.1680 |
| 20.  | C  | 6.5052 | 9.4787  | 8.3830  | 5.3435  | 3.4144  | 2.1610  | 2.7582  | 4.6676  |
| 21.  | C  | 6.6667 | 10.3457 | 8.7205  | 7.6252  | 1.0908  | 2.1518  | 4.0740  | 6.4639  |
| 22.  | C  | 7.1302 | 9.5099  | 8.7430  | 3.8845  | 4.6941  | 2.7972  | 2.1750  | 3.4208  |
| 23.  | C  | 6.8252 | 10.0824 | 8.6993  | 6.2874  | 2.1541  | 1.0876  | 2.7248  | 5.0809  |
| 24.  | C  | 8.9048 | 10.1934 | 10.0363 | 1.0916  | 7.3547  | 5.1118  | 3.3953  | 2.1682  |
| 25.  | C  | 7.9811 | 10.1026 | 9.3604  | 3.4001  | 5.0921  | 2.7327  | 1.0905  | 2.1563  |
| 26.  | C  | 8.8250 | 10.4289 | 9.9851  | 2.1634  | 6.4750  | 4.0758  | 2.1448  | 1.0902  |
| 27.  | H  | 6.3200 | 7.8519  | 7.9396  | 8.0636  | 8.8827  | 8.5377  | 8.6395  | 9.2930  |
| 28.  | H  | 6.2082 | 4.5564  | 6.1480  | 9.2895  | 11.6105 | 10.8716 | 10.5220 | 10.6249 |
| 29.  | H  | 5.6838 | 9.3069  | 8.0526  | 7.9721  | 4.3117  | 4.9071  | 6.0590  | 7.8672  |
| 30.  | H  | 4.9728 | 2.4720  | 4.2977  | 9.6247  | 11.1149 | 10.4720 | 10.2383 | 10.5342 |
| 31.  | H  | 6.3420 | 10.4181 | 8.6701  | 9.1915  | 2.5278  | 4.3159  | 6.1243  | 8.4018  |
| 32.  | H  | 8.5029 | 9.6433  | 9.7456  | 2.4555  | 8.0246  | 6.1941  | 4.9728  | 4.3030  |
| 33.  | H  | 0.0000 | 4.3031  | 2.4557  | 9.7286  | 7.2136  | 7.4759  | 8.1746  | 9.5902  |
| 34.  | H  | 4.3031 | 0.0000  | 2.4982  | 10.6487 | 10.9765 | 10.5309 | 10.4903 | 11.0402 |
| 35.  | H  | 2.4557 | 2.4982  | 0.0000  | 10.6989 | 9.1941  | 9.1607  | 9.5411  | 10.6050 |
| 36.  | H  | 9.7286 | 10.6487 | 10.6989 | 0.0000  | 8.4195  | 6.1286  | 4.2968  | 2.4983  |
| 37.  | H  | 7.2136 | 10.9765 | 9.1941  | 8.4195  | 0.0000  | 2.4843  | 4.5493  | 7.0100  |
| 38.  | H  | 7.4759 | 10.5309 | 9.1607  | 6.1286  | 2.4843  | 0.0000  | 2.0682  | 4.5343  |
| 39.  | H  | 8.1746 | 10.4903 | 9.5411  | 4.2968  | 4.5493  | 2.0682  | 0.0000  | 2.4703  |
| 40.  | H  | 9.5902 | 11.0402 | 10.6050 | 2.4983  | 7.0100  | 4.5343  | 2.4703  | 0.0000  |
| 41.  | H  | 8.0266 | 7.0311  | 8.4321  | 9.3185  | 12.4280 | 11.6165 | 11.1656 | 11.0684 |
| 42.  | H  | 8.0978 | 8.4121  | 9.1932  | 8.7392  | 11.2456 | 10.6012 | 10.3359 | 10.4659 |
| 43.  | H  | 5.7650 | 8.7476  | 7.9825  | 8.0705  | 6.3917  | 6.5828  | 7.2684  | 8.5961  |
| 44.  | O  | 4.3950 | 6.9778  | 6.2012  | 11.1015 | 8.7003  | 9.3529  | 10.2003 | 11.5883 |
| 45.  | O  | 5.4117 | 8.0504  | 7.4784  | 7.4463  | 6.6554  | 6.5352  | 6.9842  | 8.1205  |
| 46.  | O  | 8.0092 | 9.0016  | 9.3524  | 5.1820  | 9.0167  | 7.7954  | 7.1344  | 6.9773  |
| 47.  | O  | 9.0515 | 11.6050 | 11.0851 | 6.2145  | 6.8905  | 6.2198  | 6.2667  | 6.9884  |
| 48.  | O  | 2.7637 | 6.9628  | 5.1729  | 9.2493  | 4.9502  | 5.7801  | 6.9916  | 8.8715  |
| 49.  | N  | 4.7319 | 5.7955  | 6.0190  | 8.1130  | 8.8234  | 8.4219  | 8.4861  | 9.1534  |
| 50.  | N  | 5.9724 | 9.1189  | 8.0549  | 6.0228  | 3.8724  | 3.3780  | 4.1000  | 5.7996  |
| 51.  | Ru | 3.3184 | 5.9915  | 5.3025  | 8.1578  | 6.9376  | 6.9214  | 7.4211  | 8.6245  |
| 52.  | Ru | 6.2973 | 8.6343  | 8.1536  | 5.2909  | 6.0308  | 5.1517  | 5.1195  | 5.9865  |
| 53.  | Cl | 4.2702 | 6.2417  | 5.7932  | 5.7821  | 6.3316  | 5.4529  | 5.3796  | 6.2429  |

| Atom | 41 | 42      | 43      | 44     | 45      | 46     | 47     | 48      |        |
|------|----|---------|---------|--------|---------|--------|--------|---------|--------|
| 1.   | C  | 2.1666  | 1.0889  | 5.0340 | 5.4156  | 4.2985 | 3.7282 | 6.8470  | 7.4589 |
| 2.   | C  | 3.3913  | 2.1516  | 3.7314 | 4.3499  | 2.9810 | 3.5513 | 6.0454  | 6.1237 |
| 3.   | C  | 1.0909  | 2.1785  | 6.1090 | 5.9143  | 5.3046 | 4.5414 | 8.0249  | 7.9081 |
| 4.   | C  | 6.3805  | 5.5828  | 3.2955 | 1.1657  | 3.1681 | 6.4583 | 7.2275  | 3.5113 |
| 5.   | C  | 2.1540  | 3.4082  | 6.1275 | 5.4848  | 5.2886 | 5.0910 | 8.4296  | 7.1607 |
| 6.   | C  | 5.6418  | 4.2023  | 3.7808 | 6.7564  | 3.0383 | 1.1654 | 3.5205  | 6.5472 |
| 7.   | C  | 3.4114  | 3.8705  | 5.0838 | 4.4229  | 4.2648 | 4.9554 | 7.7639  | 5.7564 |
| 8.   | C  | 7.9985  | 6.1319  | 3.2710 | 7.2319  | 3.1801 | 3.4962 | 1.1657  | 6.3736 |
| 9.   | C  | 4.6993  | 5.3252  | 5.5576 | 4.4079  | 4.8069 | 6.0070 | 8.4870  | 5.1054 |
| 10.  | C  | 7.8523  | 7.0981  | 3.3239 | 3.5284  | 3.2084 | 6.5619 | 6.6807  | 1.1670 |
| 11.  | C  | 5.8682  | 6.0108  | 4.8481 | 3.7150  | 4.2364 | 6.2821 | 8.0579  | 3.7055 |
| 12.  | C  | 9.4169  | 7.9908  | 3.0254 | 6.0063  | 3.3256 | 6.1571 | 4.3426  | 3.4415 |
| 13.  | C  | 5.1073  | 6.2756  | 6.9559 | 5.5171  | 6.1973 | 7.0385 | 9.7741  | 6.0778 |
| 14.  | C  | 10.7055 | 9.3513  | 4.2796 | 6.7897  | 4.6526 | 7.4907 | 5.4110  | 3.6087 |
| 15.  | C  | 7.0989  | 7.4060  | 5.8428 | 4.3829  | 5.3405 | 7.5280 | 9.0700  | 3.5659 |
| 16.  | C  | 8.0927  | 6.9979  | 4.7767 | 8.0532  | 4.2729 | 3.7200 | 3.7271  | 6.1728 |
| 17.  | C  | 6.4918  | 7.6178  | 7.6637 | 5.9880  | 6.9809 | 8.1523 | 10.5978 | 5.9811 |
| 18.  | C  | 8.0539  | 7.1429  | 5.9159 | 9.0829  | 5.3139 | 3.5773 | 4.3973  | 7.4289 |
| 19.  | C  | 7.3661  | 8.1053  | 7.1768 | 5.4873  | 6.6109 | 8.3663 | 10.2765 | 4.8550 |
| 20.  | C  | 9.6411  | 8.4789  | 4.6093 | 7.7099  | 4.4746 | 5.7697 | 4.4277  | 4.8037 |
| 21.  | C  | 11.3993 | 10.1811 | 5.4109 | 7.9565  | 5.6279 | 9.9335 | 5.9203  | 4.3933 |
| 22.  | C  | 9.2751  | 8.2446  | 5.2811 | 8.4553  | 4.9320 | 5.1203 | 4.4194  | 5.8701 |
| 23.  | C  | 10.9113 | 9.7885  | 5.5393 | 8.3606  | 5.5504 | 7.1758 | 5.4929  | 4.9269 |
| 24.  | C  | 9.1455  | 8.4293  | 7.1883 | 10.2816 | 6.6108 | 4.8644 | 5.5008  | 8.2556 |
| 25.  | C  | 10.2390 | 9.3855  | 6.6873 | 9.7417  | 6.3184 | 6.0941 | 5.5288  | 6.8975 |
| 26.  | C  | 10.1838 | 9.4712  | 7.5256 | 10.5829 | 7.0454 | 5.9956 | 5.9999  | 8.0241 |
| 27.  | H  | 4.3328  | 2.5326  | 2.8827 | 4.2741  | 2.2593 | 3.3895 | 5.1698  | 9.9278 |
| 28.  | H  | 2.4848  | 4.3176  | 7.1403 | 6.2090  | 6.2943 | 5.9489 | 9.4271  | 7.7880 |
| 29.  | H  | 8.9334  | 7.3856  | 2.1362 | 5.1551  | 2.6611 | 6.0011 | 4.2758  | 3.3208 |
| 30.  | H  | 4.5691  | 6.1362  | 7.6315 | 5.1551  | 6.2565 | 7.1421 | 10.2461 | 7.1169 |
| 31.  | H  | 11.2468 | 9.8473  | 4.5814 | 6.6754  | 5.1081 | 8.2925 | 6.0797  | 3.6273 |
| 32.  | H  | 7.3325  | 6.4123  | 5.9897 | 9.0835  | 5.3194 | 2.7708 | 4.4088  | 7.9278 |
| 33.  | H  | 8.0266  | 8.0978  | 5.7650 | 4.3950  | 5.4117 | 8.0092 | 9.0515  | 2.7637 |
| 34.  | H  | 7.0311  | 8.4121  | 8.7476 | 6.9778  | 8.0504 | 9.0016 | 11.6050 | 6.9628 |
| 35.  | H  | 8.4321  | 9.1932  | 7.9825 | 6.2012  | 7.4784 | 9.3524 | 11.0851 | 5.1729 |
| 36.  | H  | 9.3185  | 8.7392  | 8.0705 | 11.1015 | 7.4463 | 5.1820 | 6.2145  | 9.2493 |
| 37.  | H  | 12.4280 | 11.2456 | 6.3917 | 8.7003  | 6.6554 | 9.0167 | 6.8905  | 4.9502 |
| 38.  | H  | 11.6165 | 10.6012 | 6.5828 | 9.3529  | 6.5352 | 7.7954 | 6.2198  | 5.7801 |
| 39.  | H  | 11.1656 | 10.3359 | 6.2684 | 10.2003 | 6.9842 | 7.1344 | 6.2667  | 6.9916 |
| 40.  | H  | 11.0684 | 10.4659 | 8.5961 | 11.5883 | 8.1205 | 6.9773 | 6.9884  | 8.8715 |
| 41.  | H  | 0.0000  | 2.5246  | 7.1163 | 6.8828  | 6.3223 | 5.0926 | 8.7758  | 8.9921 |

Electronic Supplementary Information for Dalton Transactions  
This journal is © The Royal Society of Chemistry 2009

|     |    |        |        |        |        |        |        |        |        |
|-----|----|--------|--------|--------|--------|--------|--------|--------|--------|
| 42. | H  | 2.5246 | 0.0000 | 5.3803 | 6.0909 | 4.7396 | 3.7133 | 6.7341 | 8.2593 |
| 43. | H  | 7.1163 | 5.3803 | 0.0000 | 4.0515 | 0.9730 | 4.7233 | 4.0196 | 4.1479 |
| 44. | O  | 6.8828 | 6.0909 | 4.0515 | 0.0000 | 4.0983 | 7.4062 | 8.0348 | 4.2038 |
| 45. | O  | 6.3223 | 4.7396 | 0.9730 | 4.0983 | 0.0000 | 3.9732 | 4.1068 | 4.1963 |
| 46. | O  | 5.0926 | 3.7133 | 4.7233 | 7.4062 | 3.9732 | 0.0000 | 4.1859 | 7.5885 |
| 47. | O  | 8.7758 | 6.7341 | 4.0196 | 8.0348 | 4.1068 | 4.1859 | 0.0000 | 7.3114 |
| 48. | O  | 8.9921 | 8.2593 | 4.1479 | 4.2038 | 4.1963 | 7.5885 | 7.3114 | 0.0000 |
| 49. | N  | 3.8611 | 3.3710 | 3.7739 | 3.7794 | 2.9690 | 4.2202 | 6.5642 | 5.1659 |
| 50. | N  | 8.8359 | 7.4993 | 3.2537 | 6.5172 | 3.2062 | 5.1828 | 3.7751 | 4.0910 |
| 51. | Ru | 6.0058 | 5.2625 | 2.7720 | 3.0289 | 2.2247 | 5.1590 | 6.1918 | 3.0378 |
| 52. | Ru | 6.9662 | 5.5390 | 2.7796 | 6.2064 | 2.2408 | 3.0374 | 3.0305 | 5.0976 |
| 53. | Cl | 6.2987 | 5.7463 | 3.7894 | 5.5294 | 2.9941 | 4.0834 | 5.5244 | 4.0664 |

| Atom | 49 | 50     | 51     | 52     | 53     |        |
|------|----|--------|--------|--------|--------|--------|
| 1.   | C  | 2.3948 | 7.0416 | 4.4246 | 5.1831 | 4.9708 |
| 2.   | C  | 1.3469 | 5.8314 | 3.1127 | 4.1526 | 3.9313 |
| 3.   | C  | 2.7703 | 7.8487 | 4.9156 | 6.0585 | 5.3227 |
| 4.   | C  | 2.8880 | 5.5276 | 1.8633 | 5.1573 | 4.3637 |
| 5.   | C  | 2.3913 | 7.6039 | 4.3402 | 6.0606 | 4.7721 |
| 6.   | C  | 3.8676 | 4.0287 | 4.3435 | 1.8750 | 3.2085 |
| 7.   | C  | 1.3646 | 6.4865 | 2.9933 | 5.1938 | 3.6928 |
| 8.   | C  | 5.5702 | 2.8904 | 5.1465 | 1.8649 | 4.3587 |
| 9.   | C  | 2.3823 | 6.5508 | 2.9550 | 5.6812 | 3.6709 |
| 10.  | C  | 4.0116 | 3.7653 | 1.8742 | 4.2952 | 3.2004 |
| 11.  | C  | 2.6816 | 5.6795 | 2.0767 | 5.2373 | 3.2030 |
| 12.  | C  | 5.8450 | 1.3469 | 4.1424 | 3.1475 | 3.9753 |
| 13.  | C  | 3.6980 | 7.7199 | 4.3061 | 6.9034 | 4.7162 |
| 14.  | C  | 7.0446 | 2.4035 | 5.1688 | 4.4578 | 5.0180 |
| 15.  | C  | 4.0873 | 6.2525 | 3.1485 | 6.2107 | 4.0199 |
| 16.  | C  | 5.7155 | 2.6851 | 5.2265 | 2.0698 | 3.1939 |
| 17.  | C  | 4.8125 | 8.1257 | 4.9038 | 7.6455 | 5.2880 |
| 18.  | C  | 6.3053 | 4.0913 | 6.2108 | 3.1370 | 4.0061 |
| 19.  | C  | 4.9609 | 7.4643 | 4.4334 | 7.3390 | 4.9889 |
| 20.  | C  | 6.4825 | 1.3671 | 5.1564 | 2.9997 | 3.6999 |
| 21.  | C  | 7.8412 | 2.7817 | 6.0307 | 4.9410 | 5.3558 |
| 22.  | C  | 6.5663 | 2.3866 | 5.6566 | 2.9550 | 3.6703 |
| 23.  | C  | 7.5912 | 2.3974 | 6.0208 | 4.3518 | 4.7856 |
| 24.  | C  | 7.5131 | 4.9647 | 7.3369 | 4.4235 | 4.9794 |
| 25.  | C  | 7.7392 | 3.7026 | 6.8826 | 4.3056 | 4.7192 |
| 26.  | C  | 8.1600 | 4.8165 | 7.6347 | 4.8984 | 5.2865 |
| 27.  | H  | 2.0564 | 5.2794 | 3.1113 | 3.6320 | 4.0073 |
| 28.  | H  | 3.3740 | 8.4414 | 5.1480 | 6.9668 | 5.4507 |
| 29.  | H  | 5.3340 | 2.0686 | 3.6614 | 3.1830 | 4.0887 |
| 30.  | H  | 4.0947 | 8.4756 | 5.1166 | 7.4464 | 5.3704 |
| 31.  | H  | 7.5021 | 3.3771 | 5.5322 | 5.2970 | 5.8000 |
| 32.  | H  | 6.0405 | 4.7352 | 6.3068 | 3.3033 | 4.2513 |
| 33.  | H  | 4.7319 | 5.9724 | 3.3184 | 6.2973 | 4.2702 |
| 34.  | H  | 5.7955 | 9.1189 | 5.9915 | 8.6343 | 6.2417 |
| 35.  | H  | 6.0190 | 8.0549 | 5.3025 | 8.1536 | 5.7932 |
| 36.  | H  | 8.1130 | 6.0228 | 8.1578 | 5.2909 | 5.7821 |
| 37.  | H  | 8.8234 | 3.8724 | 6.9376 | 6.0308 | 6.3316 |
| 38.  | H  | 8.4219 | 3.3780 | 6.9214 | 5.1517 | 5.4529 |
| 39.  | H  | 8.4861 | 4.1000 | 7.4211 | 5.1195 | 5.3796 |
| 40.  | H  | 9.1534 | 5.7996 | 8.6245 | 5.9865 | 6.2429 |
| 41.  | H  | 3.8611 | 8.8359 | 6.0058 | 6.9662 | 6.2987 |
| 42.  | H  | 3.3710 | 7.4993 | 5.2625 | 5.5390 | 5.7463 |
| 43.  | H  | 3.7739 | 3.2537 | 2.7720 | 2.7796 | 3.7894 |
| 44.  | O  | 3.7794 | 6.5172 | 3.0289 | 6.2064 | 5.5294 |
| 45.  | O  | 2.9690 | 3.2062 | 2.2247 | 2.2408 | 2.9941 |
| 46.  | O  | 4.2202 | 5.1828 | 5.1590 | 3.0374 | 4.0834 |
| 47.  | O  | 6.5642 | 3.7751 | 6.1918 | 3.0305 | 5.5244 |
| 48.  | O  | 5.1659 | 4.0910 | 3.0378 | 5.0976 | 4.0664 |
| 49.  | N  | 0.0000 | 5.5162 | 2.1487 | 4.1654 | 3.1850 |
| 50.  | N  | 5.5162 | 0.0000 | 4.1327 | 2.1643 | 3.2022 |
| 51.  | Ru | 2.1487 | 4.1327 | 0.0000 | 3.6414 | 2.5011 |
| 52.  | Ru | 4.1654 | 2.1643 | 3.6414 | 0.0000 | 2.4946 |
| 53.  | Cl | 3.1850 | 3.2022 | 2.5011 | 2.4946 | 0.0000 |

NATURAL POPULATIONS: Natural atomic orbital occupancies

| NAO | Atom | No | lang  | Type (AO) | Occupancy | Energy   |
|-----|------|----|-------|-----------|-----------|----------|
| 1   | C    | 1  | s     | Cor (1s)  | 1.99935   | -9.79315 |
| 2   | C    | 1  | s     | Val (2s)  | 1.01478   | -0.23896 |
| 3   | C    | 1  | s     | Ryd (3s)  | 0.00118   | 1.18139  |
| 4   | C    | 1  | s     | Ryd (4s)  | 0.00016   | 14.75897 |
| 5   | C    | 1  | s     | Ryd (5s)  | 0.00000   | 22.85790 |
| 6   | C    | 1  | s     | Ryd (6s)  | 0.00000   | 41.45194 |
| 7   | C    | 1  | px    | Val (2p)  | 1.03347   | -0.07204 |
| 8   | C    | 1  | px    | Ryd (3p)  | 0.00228   | 1.26524  |
| 9   | C    | 1  | px    | Ryd (4p)  | 0.00017   | 3.46327  |
| 10  | C    | 1  | py    | Val (2p)  | 1.08994   | -0.10643 |
| 11  | C    | 1  | py    | Ryd (3p)  | 0.00230   | 1.04067  |
| 12  | C    | 1  | py    | Ryd (4p)  | 0.00019   | 3.04073  |
| 13  | C    | 1  | pz    | Val (2p)  | 1.10251   | -0.10277 |
| 14  | C    | 1  | pz    | Ryd (3p)  | 0.00227   | 1.02966  |
| 15  | C    | 1  | pz    | Ryd (4p)  | 0.00018   | 3.20311  |
| 16  | C    | 1  | dxy   | Ryd (3d)  | 0.00072   | 2.46271  |
| 17  | C    | 1  | dxz   | Ryd (3d)  | 0.00079   | 2.56948  |
| 18  | C    | 1  | dyz   | Ryd (3d)  | 0.00088   | 2.88753  |
| 19  | C    | 1  | dx2y2 | Ryd (3d)  | 0.00080   | 2.81166  |
| 20  | C    | 1  | dz2   | Ryd (3d)  | 0.00052   | 2.06453  |
| 21  | C    | 2  | s     | Cor (1s)  | 1.99935   | -9.82595 |
| 22  | C    | 2  | s     | Val (2s)  | 0.97261   | -0.21647 |
| 23  | C    | 2  | s     | Ryd (3s)  | 0.00288   | 1.11652  |
| 24  | C    | 2  | s     | Ryd (4s)  | 0.00025   | 11.73971 |
| 25  | C    | 2  | s     | Ryd (5s)  | 0.00000   | 25.97867 |
| 26  | C    | 2  | s     | Ryd (6s)  | 0.00000   | 41.52754 |
| 27  | C    | 2  | px    | Val (2p)  | 1.14897   | -0.07106 |
| 28  | C    | 2  | px    | Ryd (3p)  | 0.00385   | 1.60955  |
| 29  | C    | 2  | px    | Ryd (4p)  | 0.00048   | 3.68255  |
| 30  | C    | 2  | py    | Val (2p)  | 0.91604   | -0.09706 |
| 31  | C    | 2  | py    | Ryd (3p)  | 0.00487   | 0.97082  |
| 32  | C    | 2  | py    | Ryd (4p)  | 0.00023   | 3.25218  |
| 33  | C    | 2  | pz    | Val (2p)  | 0.91170   | -0.09146 |
| 34  | C    | 2  | pz    | Ryd (3p)  | 0.00399   | 0.96659  |
| 35  | C    | 2  | pz    | Ryd (4p)  | 0.00030   | 3.60965  |
| 36  | C    | 2  | dxy   | Ryd (3d)  | 0.00080   | 2.35137  |
| 37  | C    | 2  | dxz   | Ryd (3d)  | 0.00083   | 2.45114  |
| 38  | C    | 2  | dyz   | Ryd (3d)  | 0.00063   | 3.46182  |
| 39  | C    | 2  | dx2y2 | Ryd (3d)  | 0.00099   | 2.90240  |
| 40  | C    | 2  | dz2   | Ryd (3d)  | 0.00086   | 2.23580  |

|     |   |   |       |          |         |          |
|-----|---|---|-------|----------|---------|----------|
| 41  | C | 3 | s     | Cor( 1s) | 1.99938 | -9.80271 |
| 42  | C | 3 | s     | Val( 2s) | 1.00988 | -0.24268 |
| 43  | C | 3 | s     | Ryd( 3s) | 0.00116 | 1.70920  |
| 44  | C | 3 | s     | Ryd( 4s) | 0.00012 | 12.34821 |
| 45  | C | 3 | s     | Ryd( 6s) | 0.00000 | 39.24667 |
| 46  | C | 3 | s     | Ryd( 5s) | 0.00000 | 27.61125 |
| 47  | C | 3 | px    | Val( 2p) | 1.13625 | -0.07488 |
| 48  | C | 3 | px    | Ryd( 3p) | 0.00233 | 1.41552  |
| 49  | C | 3 | px    | Ryd( 4p) | 0.00007 | 3.99133  |
| 50  | C | 3 | py    | Val( 2p) | 0.99791 | -0.10807 |
| 51  | C | 3 | py    | Ryd( 3p) | 0.00179 | 0.98195  |
| 52  | C | 3 | py    | Ryd( 4p) | 0.00011 | 2.80249  |
| 53  | C | 3 | pz    | Val( 2p) | 1.01083 | -0.10350 |
| 54  | C | 3 | pz    | Ryd( 3p) | 0.00185 | 1.03156  |
| 55  | C | 3 | pz    | Ryd( 4p) | 0.00010 | 2.91123  |
| 56  | C | 3 | dxy   | Ryd( 3d) | 0.00072 | 2.30658  |
| 57  | C | 3 | dxz   | Ryd( 3d) | 0.00081 | 2.35557  |
| 58  | C | 3 | dyz   | Ryd( 3d) | 0.00080 | 3.42504  |
| 59  | C | 3 | dx2y2 | Ryd( 3d) | 0.00091 | 2.71197  |
| 60  | C | 3 | dz2   | Ryd( 3d) | 0.00061 | 2.10729  |
| 61  | C | 4 | s     | Cor( 1s) | 1.99944 | -9.90050 |
| 62  | C | 4 | s     | Val( 2s) | 1.16236 | -0.34025 |
| 63  | C | 4 | s     | Ryd( 3s) | 0.02265 | 2.62962  |
| 64  | C | 4 | s     | Ryd( 4s) | 0.00024 | 8.27405  |
| 65  | C | 4 | s     | Ryd( 5s) | 0.00000 | 26.91209 |
| 66  | C | 4 | s     | Ryd( 6s) | 0.00000 | 45.36258 |
| 67  | C | 4 | px    | Val( 2p) | 0.66763 | -0.12573 |
| 68  | C | 4 | px    | Ryd( 3p) | 0.00377 | 1.05717  |
| 69  | C | 4 | px    | Ryd( 4p) | 0.00023 | 2.19409  |
| 70  | C | 4 | py    | Val( 2p) | 0.76627 | -0.08992 |
| 71  | C | 4 | py    | Ryd( 3p) | 0.00748 | 1.14948  |
| 72  | C | 4 | py    | Ryd( 4p) | 0.00051 | 2.87308  |
| 73  | C | 4 | pz    | Val( 2p) | 0.75837 | -0.08350 |
| 74  | C | 4 | pz    | Ryd( 3p) | 0.00738 | 1.13726  |
| 75  | C | 4 | pz    | Ryd( 4p) | 0.00048 | 2.84222  |
| 76  | C | 4 | dxy   | Ryd( 3d) | 0.00089 | 2.14067  |
| 77  | C | 4 | dxz   | Ryd( 3d) | 0.00104 | 2.23538  |
| 78  | C | 4 | dyz   | Ryd( 3d) | 0.00048 | 3.99396  |
| 79  | C | 4 | dx2y2 | Ryd( 3d) | 0.00073 | 2.39078  |
| 80  | C | 4 | dz2   | Ryd( 3d) | 0.00148 | 2.50349  |
| 81  | C | 5 | s     | Cor( 1s) | 1.99929 | -9.79400 |
| 82  | C | 5 | s     | Val( 2s) | 1.00412 | -0.22870 |
| 83  | C | 5 | s     | Ryd( 3s) | 0.00123 | 1.13486  |
| 84  | C | 5 | s     | Ryd( 4s) | 0.00022 | 11.06117 |
| 85  | C | 5 | s     | Ryd( 6s) | 0.00000 | 39.49287 |
| 86  | C | 5 | s     | Ryd( 5s) | 0.00000 | 29.10941 |
| 87  | C | 5 | px    | Val( 2p) | 1.13217 | -0.06921 |
| 88  | C | 5 | px    | Ryd( 3p) | 0.00284 | 1.21376  |
| 89  | C | 5 | px    | Ryd( 4p) | 0.00015 | 3.97226  |
| 90  | C | 5 | py    | Val( 2p) | 1.04069 | -0.10685 |
| 91  | C | 5 | py    | Ryd( 3p) | 0.00147 | 0.99270  |
| 92  | C | 5 | py    | Ryd( 4p) | 0.00020 | 2.80683  |
| 93  | C | 5 | pz    | Val( 2p) | 1.03925 | -0.10274 |
| 94  | C | 5 | pz    | Ryd( 3p) | 0.00142 | 1.02087  |
| 95  | C | 5 | pz    | Ryd( 4p) | 0.00019 | 2.88875  |
| 96  | C | 5 | dxy   | Ryd( 3d) | 0.00072 | 2.29216  |
| 97  | C | 5 | dxz   | Ryd( 3d) | 0.00076 | 2.40364  |
| 98  | C | 5 | dyz   | Ryd( 3d) | 0.00085 | 3.34679  |
| 99  | C | 5 | dx2y2 | Ryd( 3d) | 0.00084 | 2.74108  |
| 100 | C | 5 | dz2   | Ryd( 3d) | 0.00054 | 2.10632  |
| 101 | C | 6 | s     | Cor( 1s) | 1.99945 | -9.89704 |
| 102 | C | 6 | s     | Val( 2s) | 1.18534 | -0.34320 |
| 103 | C | 6 | s     | Ryd( 3s) | 0.02108 | 2.78769  |
| 104 | C | 6 | s     | Ryd( 4s) | 0.00027 | 6.25878  |
| 105 | C | 6 | s     | Ryd( 5s) | 0.00000 | 25.47617 |
| 106 | C | 6 | s     | Ryd( 6s) | 0.00000 | 45.29418 |
| 107 | C | 6 | px    | Val( 2p) | 0.76621 | -0.07364 |
| 108 | C | 6 | px    | Ryd( 3p) | 0.01006 | 0.93029  |
| 109 | C | 6 | px    | Ryd( 4p) | 0.00065 | 3.14495  |
| 110 | C | 6 | py    | Val( 2p) | 0.71166 | -0.10181 |
| 111 | C | 6 | py    | Ryd( 3p) | 0.00595 | 0.99343  |
| 112 | C | 6 | py    | Ryd( 4p) | 0.00045 | 3.06560  |
| 113 | C | 6 | pz    | Val( 2p) | 0.68925 | -0.11606 |
| 114 | C | 6 | pz    | Ryd( 3p) | 0.00481 | 0.94186  |
| 115 | C | 6 | pz    | Ryd( 4p) | 0.00029 | 2.65834  |
| 116 | C | 6 | dxy   | Ryd( 3d) | 0.00079 | 3.25833  |
| 117 | C | 6 | dxz   | Ryd( 3d) | 0.00096 | 2.82321  |
| 118 | C | 6 | dyz   | Ryd( 3d) | 0.00054 | 2.21150  |
| 119 | C | 6 | dx2y2 | Ryd( 3d) | 0.00137 | 2.61957  |
| 120 | C | 6 | dz2   | Ryd( 3d) | 0.00080 | 2.17780  |
| 121 | C | 7 | s     | Cor( 1s) | 1.99926 | -9.83446 |
| 122 | C | 7 | s     | Val( 2s) | 0.90797 | -0.17100 |
| 123 | C | 7 | s     | Ryd( 3s) | 0.00200 | 1.23014  |
| 124 | C | 7 | s     | Ryd( 4s) | 0.00022 | 13.85795 |
| 125 | C | 7 | s     | Ryd( 5s) | 0.00000 | 24.15492 |
| 126 | C | 7 | s     | Ryd( 6s) | 0.00000 | 42.86774 |
| 127 | C | 7 | px    | Val( 2p) | 0.94241 | -0.05580 |
| 128 | C | 7 | px    | Ryd( 3p) | 0.00357 | 1.47681  |
| 129 | C | 7 | px    | Ryd( 4p) | 0.00057 | 4.14631  |
| 130 | C | 7 | py    | Val( 2p) | 0.95792 | -0.09780 |
| 131 | C | 7 | py    | Ryd( 3p) | 0.00573 | 0.94704  |
| 132 | C | 7 | py    | Ryd( 4p) | 0.00016 | 3.15057  |
| 133 | C | 7 | pz    | Val( 2p) | 0.96499 | -0.09751 |
| 134 | C | 7 | pz    | Ryd( 3p) | 0.00620 | 0.97952  |
| 135 | C | 7 | pz    | Ryd( 4p) | 0.00017 | 3.16139  |
| 136 | C | 7 | dxy   | Ryd( 3d) | 0.00084 | 2.69521  |
| 137 | C | 7 | dxz   | Ryd( 3d) | 0.00087 | 2.77864  |
| 138 | C | 7 | dyz   | Ryd( 3d) | 0.00054 | 3.50852  |
| 139 | C | 7 | dx2y2 | Ryd( 3d) | 0.00096 | 3.04554  |
| 140 | C | 7 | dz2   | Ryd( 3d) | 0.00093 | 2.22241  |
| 141 | C | 8 | s     | Cor( 1s) | 1.99944 | -9.90194 |
| 142 | C | 8 | s     | Val( 2s) | 1.16555 | -0.34278 |
| 143 | C | 8 | s     | Ryd( 3s) | 0.02294 | 1.72900  |
| 144 | C | 8 | s     | Ryd( 4s) | 0.00023 | 5.71245  |
| 145 | C | 8 | s     | Ryd( 5s) | 0.00000 | 27.01122 |
| 146 | C | 8 | s     | Ryd( 6s) | 0.00000 | 45.30702 |
| 147 | C | 8 | px    | Val( 2p) | 0.71676 | -0.10321 |
| 148 | C | 8 | px    | Ryd( 3p) | 0.00639 | 1.03058  |
| 149 | C | 8 | px    | Ryd( 4p) | 0.00043 | 2.60058  |
| 150 | C | 8 | py    | Val( 2p) | 0.76632 | -0.09308 |
| 151 | C | 8 | py    | Ryd( 3p) | 0.00739 | 1.01928  |

Electronic Supplementary Information for Dalton Transactions  
This journal is © The Royal Society of Chemistry 2009

|     |   |    |       |          |         |          |
|-----|---|----|-------|----------|---------|----------|
| 152 | C | 8  | py    | Ryd( 4p) | 0.00050 | 2.85993  |
| 153 | C | 8  | pz    | Val( 2p) | 0.71045 | -0.10839 |
| 154 | C | 8  | pz    | Ryd( 3p) | 0.00460 | 1.08076  |
| 155 | C | 8  | pz    | Ryd( 4p) | 0.00029 | 2.41705  |
| 156 | C | 8  | dxy   | Ryd( 3d) | 0.00063 | 3.25969  |
| 157 | C | 8  | dxz   | Ryd( 3d) | 0.00067 | 2.52180  |
| 158 | C | 8  | dyz   | Ryd( 3d) | 0.00073 | 2.80837  |
| 159 | C | 8  | dx2y2 | Ryd( 3d) | 0.00151 | 2.37121  |
| 160 | C | 8  | dz2   | Ryd( 3d) | 0.00108 | 2.18780  |
| 161 | C | 9  | s     | Cor( 1s) | 1.99918 | -9.77454 |
| 162 | C | 9  | s     | Val( 2s) | 0.94995 | -0.15605 |
| 163 | C | 9  | s     | Ryd( 3s) | 0.00166 | 1.10777  |
| 164 | C | 9  | s     | Ryd( 4s) | 0.00016 | 15.42363 |
| 165 | C | 9  | s     | Ryd( 5s) | 0.00000 | 25.56670 |
| 166 | C | 9  | s     | Ryd( 6s) | 0.00000 | 41.86693 |
| 167 | C | 9  | px    | Val( 2p) | 1.09857 | -0.06524 |
| 168 | C | 9  | px    | Ryd( 3p) | 0.00290 | 1.29447  |
| 169 | C | 9  | px    | Ryd( 4p) | 0.00051 | 4.07177  |
| 170 | C | 9  | py    | Val( 2p) | 1.03541 | -0.07777 |
| 171 | C | 9  | py    | Ryd( 3p) | 0.00577 | 0.97792  |
| 172 | C | 9  | py    | Ryd( 4p) | 0.00021 | 3.47821  |
| 173 | C | 9  | pz    | Val( 2p) | 1.03847 | -0.07701 |
| 174 | C | 9  | pz    | Ryd( 3p) | 0.00546 | 0.91728  |
| 175 | C | 9  | pz    | Ryd( 4p) | 0.00019 | 3.41459  |
| 176 | C | 9  | dxy   | Ryd( 3d) | 0.00069 | 2.51667  |
| 177 | C | 9  | dxz   | Ryd( 3d) | 0.00071 | 2.53405  |
| 178 | C | 9  | dyz   | Ryd( 3d) | 0.00067 | 3.40373  |
| 179 | C | 9  | dx2y2 | Ryd( 3d) | 0.00085 | 2.87329  |
| 180 | C | 9  | dz2   | Ryd( 3d) | 0.00058 | 2.18511  |
| 181 | C | 10 | s     | Cor( 1s) | 1.99945 | -9.89526 |
| 182 | C | 10 | s     | Val( 2s) | 1.19057 | -0.33962 |
| 183 | C | 10 | s     | Ryd( 3s) | 0.02224 | 3.17588  |
| 184 | C | 10 | s     | Ryd( 4s) | 0.00028 | 7.08053  |
| 185 | C | 10 | s     | Ryd( 5s) | 0.00000 | 25.24557 |
| 186 | C | 10 | s     | Ryd( 6s) | 0.00000 | 45.55751 |
| 187 | C | 10 | px    | Val( 2p) | 0.76030 | -0.08345 |
| 188 | C | 10 | px    | Ryd( 3p) | 0.00772 | 1.14257  |
| 189 | C | 10 | px    | Ryd( 4p) | 0.00049 | 3.30981  |
| 190 | C | 10 | py    | Val( 2p) | 0.71229 | -0.10447 |
| 191 | C | 10 | py    | Ryd( 3p) | 0.00588 | 1.04042  |
| 192 | C | 10 | py    | Ryd( 4p) | 0.00042 | 3.04029  |
| 193 | C | 10 | pz    | Val( 2p) | 0.70892 | -0.10350 |
| 194 | C | 10 | pz    | Ryd( 3p) | 0.00758 | 1.00624  |
| 195 | C | 10 | pz    | Ryd( 4p) | 0.00048 | 2.66848  |
| 196 | C | 10 | dxy   | Ryd( 3d) | 0.00071 | 2.93048  |
| 197 | C | 10 | dxz   | Ryd( 3d) | 0.00063 | 3.18948  |
| 198 | C | 10 | dyz   | Ryd( 3d) | 0.00065 | 2.45229  |
| 199 | C | 10 | dx2y2 | Ryd( 3d) | 0.00133 | 2.39500  |
| 200 | C | 10 | dz2   | Ryd( 3d) | 0.00116 | 2.18821  |
| 201 | C | 11 | s     | Cor( 1s) | 1.99907 | -9.78078 |
| 202 | C | 11 | s     | Val( 2s) | 1.02733 | -0.20600 |
| 203 | C | 11 | s     | Ryd( 3s) | 0.00554 | 2.71038  |
| 204 | C | 11 | s     | Ryd( 4s) | 0.00027 | 14.13423 |
| 205 | C | 11 | s     | Ryd( 5s) | 0.00000 | 26.90260 |
| 206 | C | 11 | s     | Ryd( 6s) | 0.00000 | 40.47168 |
| 207 | C | 11 | px    | Val( 2p) | 1.03778 | -0.06278 |
| 208 | C | 11 | px    | Ryd( 3p) | 0.01027 | 1.10308  |
| 209 | C | 11 | px    | Ryd( 4p) | 0.00034 | 3.95041  |
| 210 | C | 11 | py    | Val( 2p) | 0.97346 | -0.08169 |
| 211 | C | 11 | py    | Ryd( 3p) | 0.00947 | 0.97163  |
| 212 | C | 11 | py    | Ryd( 4p) | 0.00028 | 3.56713  |
| 213 | C | 11 | pz    | Val( 2p) | 0.96273 | -0.07660 |
| 214 | C | 11 | pz    | Ryd( 3p) | 0.00935 | 0.84110  |
| 215 | C | 11 | pz    | Ryd( 4p) | 0.00026 | 3.42003  |
| 216 | C | 11 | dxy   | Ryd( 3d) | 0.00051 | 2.65763  |
| 217 | C | 11 | dxz   | Ryd( 3d) | 0.00050 | 2.53094  |
| 218 | C | 11 | dyz   | Ryd( 3d) | 0.00085 | 3.36570  |
| 219 | C | 11 | dx2y2 | Ryd( 3d) | 0.00100 | 2.83844  |
| 220 | C | 11 | dz2   | Ryd( 3d) | 0.00069 | 2.21317  |
| 221 | C | 12 | s     | Cor( 1s) | 1.99935 | -9.83875 |
| 222 | C | 12 | s     | Val( 2s) | 0.96194 | -0.22451 |
| 223 | C | 12 | s     | Ryd( 3s) | 0.00275 | 1.08893  |
| 224 | C | 12 | s     | Ryd( 4s) | 0.00025 | 11.63756 |
| 225 | C | 12 | s     | Ryd( 5s) | 0.00000 | 25.81380 |
| 226 | C | 12 | s     | Ryd( 6s) | 0.00000 | 41.69128 |
| 227 | C | 12 | px    | Val( 2p) | 0.94061 | -0.09387 |
| 228 | C | 12 | px    | Ryd( 3p) | 0.00319 | 1.05375  |
| 229 | C | 12 | px    | Ryd( 4p) | 0.00048 | 3.49442  |
| 230 | C | 12 | py    | Val( 2p) | 0.92644 | -0.10964 |
| 231 | C | 12 | py    | Ryd( 3p) | 0.00498 | 0.88655  |
| 232 | C | 12 | py    | Ryd( 4p) | 0.00023 | 2.98382  |
| 233 | C | 12 | pz    | Val( 2p) | 1.11682 | -0.09295 |
| 234 | C | 12 | pz    | Ryd( 3p) | 0.00505 | 1.25124  |
| 235 | C | 12 | pz    | Ryd( 4p) | 0.00026 | 3.43841  |
| 236 | C | 12 | dxy   | Ryd( 3d) | 0.00072 | 3.27113  |
| 237 | C | 12 | dxz   | Ryd( 3d) | 0.00092 | 2.87485  |
| 238 | C | 12 | dyz   | Ryd( 3d) | 0.00070 | 2.53101  |
| 239 | C | 12 | dx2y2 | Ryd( 3d) | 0.00086 | 2.08829  |
| 240 | C | 12 | dz2   | Ryd( 3d) | 0.00090 | 2.52233  |
| 241 | C | 13 | s     | Cor( 1s) | 1.99930 | -9.77248 |
| 242 | C | 13 | s     | Val( 2s) | 0.99410 | -0.20014 |
| 243 | C | 13 | s     | Ryd( 3s) | 0.00128 | 1.14319  |
| 244 | C | 13 | s     | Ryd( 4s) | 0.00024 | 10.59404 |
| 245 | C | 13 | s     | Ryd( 5s) | 0.00000 | 39.00237 |
| 246 | C | 13 | s     | Ryd( 6s) | 0.00000 | 30.11588 |
| 247 | C | 13 | px    | Val( 2p) | 1.13286 | -0.04209 |
| 248 | C | 13 | px    | Ryd( 3p) | 0.00293 | 1.24941  |
| 249 | C | 13 | px    | Ryd( 4p) | 0.00015 | 3.87466  |
| 250 | C | 13 | py    | Val( 2p) | 1.02338 | -0.07909 |
| 251 | C | 13 | py    | Ryd( 3p) | 0.00175 | 0.92926  |
| 252 | C | 13 | py    | Ryd( 4p) | 0.00018 | 2.85748  |
| 253 | C | 13 | pz    | Val( 2p) | 1.02284 | -0.07966 |
| 254 | C | 13 | pz    | Ryd( 3p) | 0.00179 | 0.92811  |
| 255 | C | 13 | pz    | Ryd( 4p) | 0.00018 | 2.87111  |
| 256 | C | 13 | dxy   | Ryd( 3d) | 0.00069 | 2.43440  |
| 257 | C | 13 | dxz   | Ryd( 3d) | 0.00065 | 2.44223  |
| 258 | C | 13 | dyz   | Ryd( 3d) | 0.00082 | 3.48540  |
| 259 | C | 13 | dx2y2 | Ryd( 3d) | 0.00083 | 2.66076  |
| 260 | C | 13 | dz2   | Ryd( 3d) | 0.00057 | 2.10467  |
| 261 | C | 14 | s     | Cor( 1s) | 1.99934 | -9.79932 |

|     |      |       |           |         |          |
|-----|------|-------|-----------|---------|----------|
| 262 | C 14 | s     | Val ( 2s) | 1.01382 | -0.24534 |
| 263 | C 14 | s     | Ryd ( 3s) | 0.00115 | 1.15768  |
| 264 | C 14 | s     | Ryd ( 4s) | 0.00016 | 14.89671 |
| 265 | C 14 | s     | Ryd ( 5s) | 0.00000 | 22.63493 |
| 266 | C 14 | s     | Ryd ( 6s) | 0.00000 | 41.39231 |
| 267 | C 14 | px    | Val ( 2p) | 1.08721 | -0.10161 |
| 268 | C 14 | px    | Ryd ( 3p) | 0.00262 | 1.04287  |
| 269 | C 14 | px    | Ryd ( 4p) | 0.00017 | 3.45591  |
| 270 | C 14 | py    | Val ( 2p) | 1.08826 | -0.11377 |
| 271 | C 14 | py    | Ryd ( 3p) | 0.00234 | 1.02199  |
| 272 | C 14 | py    | Ryd ( 4p) | 0.00019 | 2.97371  |
| 273 | C 14 | pz    | Val ( 2p) | 1.05081 | -0.08655 |
| 274 | C 14 | pz    | Ryd ( 3p) | 0.00193 | 1.24355  |
| 275 | C 14 | pz    | Ryd ( 4p) | 0.00019 | 3.15521  |
| 276 | C 14 | dxy   | Ryd ( 3d) | 0.00082 | 2.77853  |
| 277 | C 14 | dxz   | Ryd ( 3d) | 0.00082 | 2.72267  |
| 278 | C 14 | dyz   | Ryd ( 3d) | 0.00077 | 2.52390  |
| 279 | C 14 | dx2y2 | Ryd ( 3d) | 0.00049 | 1.97028  |
| 280 | C 14 | dz2   | Ryd ( 3d) | 0.00080 | 2.74433  |
| 281 | C 15 | s     | Cor ( 1s) | 1.99930 | -9.75945 |
| 282 | C 15 | s     | Val ( 2s) | 1.01057 | -0.19998 |
| 283 | C 15 | s     | Ryd ( 3s) | 0.00164 | 1.32324  |
| 284 | C 15 | s     | Ryd ( 4s) | 0.00016 | 13.12139 |
| 285 | C 15 | s     | Ryd ( 6s) | 0.00000 | 41.66772 |
| 286 | C 15 | s     | Ryd ( 5s) | 0.00000 | 25.15032 |
| 287 | C 15 | px    | Val ( 2p) | 1.14643 | -0.03867 |
| 288 | C 15 | px    | Ryd ( 3p) | 0.00407 | 1.57841  |
| 289 | C 15 | px    | Ryd ( 4p) | 0.00026 | 3.80713  |
| 290 | C 15 | py    | Val ( 2p) | 1.04889 | -0.07215 |
| 291 | C 15 | py    | Ryd ( 3p) | 0.00274 | 1.00420  |
| 292 | C 15 | py    | Ryd ( 4p) | 0.00025 | 3.69914  |
| 293 | C 15 | pz    | Val ( 2p) | 1.04128 | -0.07433 |
| 294 | C 15 | pz    | Ryd ( 3p) | 0.00270 | 0.87063  |
| 295 | C 15 | pz    | Ryd ( 4p) | 0.00024 | 3.35981  |
| 296 | C 15 | dxy   | Ryd ( 3d) | 0.00081 | 2.41731  |
| 297 | C 15 | dxz   | Ryd ( 3d) | 0.00076 | 2.40194  |
| 298 | C 15 | dyz   | Ryd ( 3d) | 0.00087 | 3.20883  |
| 299 | C 15 | dx2y2 | Ryd ( 3d) | 0.00086 | 2.65723  |
| 300 | C 15 | dz2   | Ryd ( 3d) | 0.00049 | 2.06955  |
| 301 | C 16 | s     | Cor ( 1s) | 1.99908 | -9.78197 |
| 302 | C 16 | s     | Val ( 2s) | 1.02606 | -0.21084 |
| 303 | C 16 | s     | Ryd ( 3s) | 0.00518 | 2.58281  |
| 304 | C 16 | s     | Ryd ( 4s) | 0.00027 | 13.75188 |
| 305 | C 16 | s     | Ryd ( 5s) | 0.00000 | 27.02058 |
| 306 | C 16 | s     | Ryd ( 6s) | 0.00000 | 40.30294 |
| 307 | C 16 | px    | Val ( 2p) | 0.93340 | -0.04980 |
| 308 | C 16 | px    | Ryd ( 3p) | 0.00764 | 0.75240  |
| 309 | C 16 | px    | Ryd ( 4p) | 0.00028 | 3.47924  |
| 310 | C 16 | py    | Val ( 2p) | 0.96885 | -0.08183 |
| 311 | C 16 | py    | Ryd ( 3p) | 0.00901 | 0.69248  |
| 312 | C 16 | py    | Ryd ( 4p) | 0.00028 | 3.46446  |
| 313 | C 16 | pz    | Val ( 2p) | 1.06884 | -0.09528 |
| 314 | C 16 | pz    | Ryd ( 3p) | 0.01232 | 0.96286  |
| 315 | C 16 | pz    | Ryd ( 4p) | 0.00031 | 3.86412  |
| 316 | C 16 | dxy   | Ryd ( 3d) | 0.00080 | 3.33644  |
| 317 | C 16 | dxz   | Ryd ( 3d) | 0.00108 | 2.83407  |
| 318 | C 16 | dyz   | Ryd ( 3d) | 0.00059 | 2.49586  |
| 319 | C 16 | dx2y2 | Ryd ( 3d) | 0.00050 | 2.06373  |
| 320 | C 16 | dz2   | Ryd ( 3d) | 0.00058 | 2.48336  |
| 321 | C 17 | s     | Cor ( 1s) | 1.99937 | -9.76593 |
| 322 | C 17 | s     | Val ( 2s) | 1.00270 | -0.20925 |
| 323 | C 17 | s     | Ryd ( 3s) | 0.00128 | 1.69032  |
| 324 | C 17 | s     | Ryd ( 4s) | 0.00013 | 10.79046 |
| 325 | C 17 | s     | Ryd ( 6s) | 0.00000 | 39.29143 |
| 326 | C 17 | s     | Ryd ( 5s) | 0.00000 | 28.97771 |
| 327 | C 17 | px    | Val ( 2p) | 1.11448 | -0.04559 |
| 328 | C 17 | px    | Ryd ( 3p) | 0.00240 | 1.31718  |
| 329 | C 17 | px    | Ryd ( 4p) | 0.00010 | 3.37876  |
| 330 | C 17 | py    | Val ( 2p) | 1.04999 | -0.07520 |
| 331 | C 17 | py    | Ryd ( 3p) | 0.00254 | 0.91764  |
| 332 | C 17 | py    | Ryd ( 4p) | 0.00015 | 2.81652  |
| 333 | C 17 | pz    | Val ( 2p) | 1.05306 | -0.07582 |
| 334 | C 17 | pz    | Ryd ( 3p) | 0.00252 | 0.90841  |
| 335 | C 17 | pz    | Ryd ( 4p) | 0.00015 | 2.80837  |
| 336 | C 17 | dxy   | Ryd ( 3d) | 0.00074 | 2.34013  |
| 337 | C 17 | dxz   | Ryd ( 3d) | 0.00073 | 2.30579  |
| 338 | C 17 | dyz   | Ryd ( 3d) | 0.00081 | 3.39679  |
| 339 | C 17 | dx2y2 | Ryd ( 3d) | 0.00086 | 2.81384  |
| 340 | C 17 | dz2   | Ryd ( 3d) | 0.00051 | 2.14161  |
| 341 | C 18 | s     | Cor ( 1s) | 1.99930 | -9.76141 |
| 342 | C 18 | s     | Val ( 2s) | 1.01095 | -0.20207 |
| 343 | C 18 | s     | Ryd ( 3s) | 0.00162 | 1.32830  |
| 344 | C 18 | s     | Ryd ( 4s) | 0.00016 | 12.91951 |
| 345 | C 18 | s     | Ryd ( 6s) | 0.00000 | 41.63261 |
| 346 | C 18 | s     | Ryd ( 5s) | 0.00000 | 25.11890 |
| 347 | C 18 | px    | Val ( 2p) | 1.09384 | -0.07092 |
| 348 | C 18 | px    | Ryd ( 3p) | 0.00362 | 0.97203  |
| 349 | C 18 | px    | Ryd ( 4p) | 0.00016 | 3.34419  |
| 350 | C 18 | py    | Val ( 2p) | 1.05037 | -0.07591 |
| 351 | C 18 | py    | Ryd ( 3p) | 0.00279 | 0.79188  |
| 352 | C 18 | py    | Ryd ( 4p) | 0.00024 | 3.22036  |
| 353 | C 18 | pz    | Val ( 2p) | 1.09166 | -0.04826 |
| 354 | C 18 | pz    | Ryd ( 3p) | 0.00294 | 1.23427  |
| 355 | C 18 | pz    | Ryd ( 4p) | 0.00032 | 1.23427  |
| 356 | C 18 | dxy   | Ryd ( 3d) | 0.00085 | 3.26531  |
| 357 | C 18 | dxz   | Ryd ( 3d) | 0.00080 | 3.01037  |
| 358 | C 18 | dyz   | Ryd ( 3d) | 0.00084 | 2.41811  |
| 359 | C 18 | dx2y2 | Ryd ( 3d) | 0.00041 | 2.59701  |
| 360 | C 18 | dz2   | Ryd ( 3d) | 0.00090 | 1.89126  |
| 361 | C 19 | s     | Cor ( 1s) | 1.99937 | -9.76929 |
| 362 | C 19 | s     | Val ( 2s) | 1.00949 | -0.21196 |
| 363 | C 19 | s     | Ryd ( 3s) | 0.00115 | 1.69677  |
| 364 | C 19 | s     | Ryd ( 4s) | 0.00016 | 11.38578 |
| 365 | C 19 | s     | Ryd ( 6s) | 0.00000 | 29.11434 |
| 366 | C 19 | s     | Ryd ( 5s) | 0.00000 | 38.46814 |
| 367 | C 19 | px    | Val ( 2p) | 1.03432 | -0.04040 |
| 368 | C 19 | px    | Ryd ( 3p) | 0.00220 | 1.32010  |
| 369 | C 19 | px    | Ryd ( 4p) | 0.00015 | 3.25015  |
| 370 | C 19 | py    | Val ( 2p) | 1.07024 | -0.07487 |
| 371 | C 19 | py    | Ryd ( 3p) | 0.00236 | 0.99067  |
| 372 | C 19 | py    | Ryd ( 4p) | 0.00012 | 3.05383  |

|     |      |       |           |         |          |
|-----|------|-------|-----------|---------|----------|
| 373 | C 19 | pz    | Val ( 2p) | 1.06499 | -0.07623 |
| 374 | C 19 | pz    | Ryd ( 3p) | 0.00234 | 0.95997  |
| 375 | C 19 | pz    | Ryd ( 4p) | 0.00012 | 2.93657  |
| 376 | C 19 | dxy   | Ryd ( 3d) | 0.00075 | 2.52879  |
| 377 | C 19 | dxz   | Ryd ( 3d) | 0.00074 | 2.50170  |
| 378 | C 19 | dyz   | Ryd ( 3d) | 0.00087 | 3.02136  |
| 379 | C 19 | dx2y2 | Ryd ( 3d) | 0.00087 | 2.86173  |
| 380 | C 19 | dz2   | Ryd ( 3d) | 0.00047 | 2.13242  |
| 381 | C 20 | s     | Cor ( 1s) | 1.99926 | -9.83976 |
| 382 | C 20 | s     | Val ( 2s) | 0.90906 | -0.17641 |
| 383 | C 20 | s     | Ryd ( 3s) | 0.00195 | 1.21972  |
| 384 | C 20 | s     | Ryd ( 4s) | 0.00022 | 13.79434 |
| 385 | C 20 | s     | Ryd ( 5s) | 0.00000 | 24.12429 |
| 386 | C 20 | s     | Ryd ( 6s) | 0.00000 | 42.78640 |
| 387 | C 20 | px    | Val ( 2p) | 0.99774 | -0.09652 |
| 388 | C 20 | px    | Ryd ( 3p) | 0.00516 | 1.00469  |
| 389 | C 20 | px    | Ryd ( 4p) | 0.00032 | 3.20493  |
| 390 | C 20 | py    | Val ( 2p) | 0.95891 | -0.10324 |
| 391 | C 20 | py    | Ryd ( 3p) | 0.00565 | 0.91207  |
| 392 | C 20 | py    | Ryd ( 4p) | 0.00016 | 3.12457  |
| 393 | C 20 | pz    | Val ( 2p) | 0.90476 | -0.06804 |
| 394 | C 20 | pz    | Ryd ( 3p) | 0.00468 | 1.33293  |
| 395 | C 20 | pz    | Ryd ( 4p) | 0.00042 | 3.75112  |
| 396 | C 20 | dxy   | Ryd ( 3d) | 0.00063 | 3.30188  |
| 397 | C 20 | dxz   | Ryd ( 3d) | 0.00098 | 2.84973  |
| 398 | C 20 | dyz   | Ryd ( 3d) | 0.00076 | 2.83731  |
| 399 | C 20 | dx2y2 | Ryd ( 3d) | 0.00091 | 2.05745  |
| 400 | C 20 | dz2   | Ryd ( 3d) | 0.00090 | 3.07355  |
| 401 | C 21 | s     | Cor ( 1s) | 1.99938 | -9.80762 |
| 402 | C 21 | s     | Val ( 2s) | 1.00957 | -0.24736 |
| 403 | C 21 | s     | Ryd ( 3s) | 0.00112 | 1.73132  |
| 404 | C 21 | s     | Ryd ( 4s) | 0.00013 | 12.08443 |
| 405 | C 21 | s     | Ryd ( 6s) | 0.00000 | 39.46529 |
| 406 | C 21 | s     | Ryd ( 5s) | 0.00000 | 27.35105 |
| 407 | C 21 | px    | Val ( 2p) | 1.07718 | -0.10188 |
| 408 | C 21 | px    | Ryd ( 3p) | 0.00191 | 1.13893  |
| 409 | C 21 | px    | Ryd ( 4p) | 0.00009 | 3.17398  |
| 410 | C 21 | py    | Val ( 2p) | 0.99729 | -0.11374 |
| 411 | C 21 | py    | Ryd ( 3p) | 0.00176 | 0.97702  |
| 412 | C 21 | py    | Ryd ( 4p) | 0.00011 | 2.76829  |
| 413 | C 21 | pz    | Val ( 2p) | 1.06868 | -0.08572 |
| 414 | C 21 | pz    | Ryd ( 3p) | 0.00227 | 1.32344  |
| 415 | C 21 | pz    | Ryd ( 4p) | 0.00008 | 3.69509  |
| 416 | C 21 | dxy   | Ryd ( 3d) | 0.00080 | 3.09646  |
| 417 | C 21 | dxz   | Ryd ( 3d) | 0.00093 | 2.49436  |
| 418 | C 21 | dyz   | Ryd ( 3d) | 0.00072 | 2.59346  |
| 419 | C 21 | dx2y2 | Ryd ( 3d) | 0.00054 | 1.90414  |
| 420 | C 21 | dz2   | Ryd ( 3d) | 0.00086 | 2.80246  |
| 421 | C 22 | s     | Cor ( 1s) | 1.99918 | -9.77656 |
| 422 | C 22 | s     | Val ( 2s) | 0.94938 | -0.15844 |
| 423 | C 22 | s     | Ryd ( 3s) | 0.00163 | 1.06227  |
| 424 | C 22 | s     | Ryd ( 4s) | 0.00016 | 15.31901 |
| 425 | C 22 | s     | Ryd ( 5s) | 0.00000 | 25.55531 |
| 426 | C 22 | s     | Ryd ( 6s) | 0.00000 | 41.78573 |
| 427 | C 22 | px    | Val ( 2p) | 1.05551 | -0.08012 |
| 428 | C 22 | px    | Ryd ( 3p) | 0.00562 | 0.96223  |
| 429 | C 22 | px    | Ryd ( 4p) | 0.00022 | 3.57101  |
| 430 | C 22 | py    | Val ( 2p) | 1.03582 | -0.08121 |
| 431 | C 22 | py    | Ryd ( 3p) | 0.00587 | 0.84501  |
| 432 | C 22 | py    | Ryd ( 4p) | 0.00020 | 3.29970  |
| 433 | C 22 | pz    | Val ( 2p) | 1.08347 | -0.06897 |
| 434 | C 22 | pz    | Ryd ( 3p) | 0.00275 | 1.12221  |
| 435 | C 22 | pz    | Ryd ( 4p) | 0.00049 | 3.68342  |
| 436 | C 22 | dxy   | Ryd ( 3d) | 0.00071 | 3.14910  |
| 437 | C 22 | dxz   | Ryd ( 3d) | 0.00074 | 2.74360  |
| 438 | C 22 | dyz   | Ryd ( 3d) | 0.00065 | 2.73644  |
| 439 | C 22 | dx2y2 | Ryd ( 3d) | 0.00046 | 1.94170  |
| 440 | C 22 | dz2   | Ryd ( 3d) | 0.00094 | 2.84398  |
| 441 | C 23 | s     | Cor ( 1s) | 1.99929 | -9.79850 |
| 442 | C 23 | s     | Val ( 2s) | 1.00462 | -0.23361 |
| 443 | C 23 | s     | Ryd ( 3s) | 0.00121 | 1.13719  |
| 444 | C 23 | s     | Ryd ( 4s) | 0.00022 | 10.87075 |
| 445 | C 23 | s     | Ryd ( 6s) | 0.00000 | 39.54202 |
| 446 | C 23 | s     | Ryd ( 5s) | 0.00000 | 29.20437 |
| 447 | C 23 | px    | Val ( 2p) | 1.02353 | -0.09617 |
| 448 | C 23 | px    | Ryd ( 3p) | 0.00172 | 0.99137  |
| 449 | C 23 | px    | Ryd ( 4p) | 0.00016 | 3.30119  |
| 450 | C 23 | py    | Val ( 2p) | 1.03587 | -0.11175 |
| 451 | C 23 | py    | Ryd ( 3p) | 0.00148 | 0.98281  |
| 452 | C 23 | py    | Ryd ( 4p) | 0.00020 | 2.79996  |
| 453 | C 23 | pz    | Val ( 2p) | 1.14892 | -0.08440 |
| 454 | C 23 | pz    | Ryd ( 3p) | 0.00249 | 1.22794  |
| 455 | C 23 | pz    | Ryd ( 4p) | 0.00018 | 3.47787  |
| 456 | C 23 | dxy   | Ryd ( 3d) | 0.00077 | 3.20189  |
| 457 | C 23 | dxz   | Ryd ( 3d) | 0.00086 | 2.76138  |
| 458 | C 23 | dyz   | Ryd ( 3d) | 0.00079 | 2.44264  |
| 459 | C 23 | dx2y2 | Ryd ( 3d) | 0.00045 | 2.01361  |
| 460 | C 23 | dz2   | Ryd ( 3d) | 0.00083 | 2.45900  |
| 461 | C 24 | s     | Cor ( 1s) | 1.99937 | -9.77140 |
| 462 | C 24 | s     | Val ( 2s) | 1.00987 | -0.21430 |
| 463 | C 24 | s     | Ryd ( 3s) | 0.00115 | 1.71953  |
| 464 | C 24 | s     | Ryd ( 4s) | 0.00016 | 11.38869 |
| 465 | C 24 | s     | Ryd ( 6s) | 0.00000 | 29.05947 |
| 466 | C 24 | s     | Ryd ( 5s) | 0.00000 | 38.46909 |
| 467 | C 24 | px    | Val ( 2p) | 1.06351 | -0.07209 |
| 468 | C 24 | px    | Ryd ( 3p) | 0.00216 | 1.05864  |
| 469 | C 24 | px    | Ryd ( 4p) | 0.00013 | 2.85639  |
| 470 | C 24 | py    | Val ( 2p) | 1.07036 | -0.07668 |
| 471 | C 24 | py    | Ryd ( 3p) | 0.00235 | 0.96127  |
| 472 | C 24 | py    | Ryd ( 4p) | 0.00012 | 2.89104  |
| 473 | C 24 | pz    | Val ( 2p) | 1.03291 | -0.04894 |
| 474 | C 24 | pz    | Ryd ( 3p) | 0.00234 | 1.19807  |
| 475 | C 24 | pz    | Ryd ( 4p) | 0.00014 | 3.23870  |
| 476 | C 24 | dxy   | Ryd ( 3d) | 0.00088 | 2.86322  |
| 477 | C 24 | dxz   | Ryd ( 3d) | 0.00084 | 2.73131  |
| 478 | C 24 | dyz   | Ryd ( 3d) | 0.00075 | 2.68674  |
| 479 | C 24 | dx2y2 | Ryd ( 3d) | 0.00035 | 1.88466  |
| 480 | C 24 | dz2   | Ryd ( 3d) | 0.00089 | 2.86152  |
| 481 | C 25 | s     | Cor ( 1s) | 1.99930 | -9.77486 |
| 482 | C 25 | s     | Val ( 2s) | 0.99408 | -0.20266 |



|     |      |       |          |         |          |
|-----|------|-------|----------|---------|----------|
| 483 | C 25 | s     | Ryd( 3s) | 0.00128 | 1.13032  |
| 484 | C 25 | s     | Ryd( 4s) | 0.00025 | 10.52977 |
| 485 | C 25 | s     | Ryd( 6s) | 0.00000 | 38.93275 |
| 486 | C 25 | s     | Ryd( 5s) | 0.00000 | 30.21501 |
| 487 | C 25 | px    | Val( 2p) | 1.06966 | -0.07823 |
| 488 | C 25 | px    | Ryd( 3p) | 0.00200 | 1.05554  |
| 489 | C 25 | px    | Ryd( 4p) | 0.00018 | 2.89064  |
| 490 | C 25 | py    | Val( 2p) | 1.02474 | -0.08131 |
| 491 | C 25 | py    | Ryd( 3p) | 0.00175 | 0.93597  |
| 492 | C 25 | py    | Ryd( 4p) | 0.00018 | 2.85312  |
| 493 | C 25 | pz    | Val( 2p) | 1.08333 | -0.04858 |
| 494 | C 25 | pz    | Ryd( 3p) | 0.00270 | 1.09272  |
| 495 | C 25 | pz    | Ryd( 4p) | 0.00014 | 3.79141  |
| 496 | C 25 | dxy   | Ryd( 3d) | 0.00081 | 3.19919  |
| 497 | C 25 | dxz   | Ryd( 3d) | 0.00082 | 2.43291  |
| 498 | C 25 | dyz   | Ryd( 3d) | 0.00070 | 2.70818  |
| 499 | C 25 | dx2y2 | Ryd( 3d) | 0.00045 | 1.89555  |
| 500 | C 25 | dz2   | Ryd( 3d) | 0.00077 | 2.88138  |
| 501 | C 26 | s     | Cor( 1s) | 1.99937 | -9.76795 |
| 502 | C 26 | s     | Val( 2s) | 1.00272 | -0.21132 |
| 503 | C 26 | s     | Ryd( 3s) | 0.00128 | 1.69344  |
| 504 | C 26 | s     | Ryd( 4s) | 0.00013 | 10.54289 |
| 505 | C 26 | s     | Ryd( 6s) | 0.00000 | 39.30640 |
| 506 | C 26 | s     | Ryd( 5s) | 0.00000 | 28.95545 |
| 507 | C 26 | px    | Val( 2p) | 1.02692 | -0.07271 |
| 508 | C 26 | px    | Ryd( 3p) | 0.00258 | 0.96377  |
| 509 | C 26 | px    | Ryd( 4p) | 0.00014 | 2.78622  |
| 510 | C 26 | py    | Val( 2p) | 1.04845 | -0.07697 |
| 511 | C 26 | py    | Ryd( 3p) | 0.00253 | 0.92108  |
| 512 | C 26 | py    | Ryd( 4p) | 0.00015 | 2.81194  |
| 513 | C 26 | pz    | Val( 2p) | 1.14170 | -0.05312 |
| 514 | C 26 | pz    | Ryd( 3p) | 0.00234 | 1.25804  |
| 515 | C 26 | pz    | Ryd( 4p) | 0.00011 | 3.37310  |
| 516 | C 26 | dxy   | Ryd( 3d) | 0.00078 | 3.31217  |
| 517 | C 26 | dxz   | Ryd( 3d) | 0.00076 | 2.70146  |
| 518 | C 26 | dyz   | Ryd( 3d) | 0.00077 | 2.44123  |
| 519 | C 26 | dx2y2 | Ryd( 3d) | 0.00043 | 1.94610  |
| 520 | C 26 | dz2   | Ryd( 3d) | 0.00091 | 2.58774  |
| 521 | H 27 | s     | Val( 1s) | 0.75315 | 0.04123  |
| 522 | H 27 | s     | Ryd( 2s) | 0.00135 | 1.59322  |
| 523 | H 27 | s     | Ryd( 3s) | 0.00054 | 1.85395  |
| 524 | H 27 | px    | Ryd( 2p) | 0.00082 | 3.06329  |
| 525 | H 27 | py    | Ryd( 2p) | 0.00025 | 1.51359  |
| 526 | H 27 | pz    | Ryd( 2p) | 0.00016 | 1.50961  |
| 527 | H 28 | s     | Val( 1s) | 0.77587 | 0.02446  |
| 528 | H 28 | s     | Ryd( 3s) | 0.00043 | 1.98041  |
| 529 | H 28 | s     | Ryd( 2s) | 0.00022 | 1.70044  |
| 530 | H 28 | px    | Ryd( 2p) | 0.00044 | 3.37030  |
| 531 | H 28 | py    | Ryd( 2p) | 0.00032 | 1.52414  |
| 532 | H 28 | pz    | Ryd( 2p) | 0.00030 | 1.52460  |
| 533 | H 29 | s     | Val( 1s) | 0.78958 | 0.00446  |
| 534 | H 29 | s     | Ryd( 2s) | 0.00146 | 1.52513  |
| 535 | H 29 | s     | Ryd( 3s) | 0.00052 | 1.94261  |
| 536 | H 29 | px    | Ryd( 2p) | 0.00025 | 1.44040  |
| 537 | H 29 | py    | Ryd( 2p) | 0.00038 | 1.55405  |
| 538 | H 29 | pz    | Ryd( 2p) | 0.00073 | 3.17327  |
| 539 | H 30 | s     | Val( 1s) | 0.79464 | 0.03600  |
| 540 | H 30 | s     | Ryd( 3s) | 0.00049 | 1.98973  |
| 541 | H 30 | s     | Ryd( 2s) | 0.00025 | 1.61468  |
| 542 | H 30 | px    | Ryd( 2p) | 0.00054 | 3.77820  |
| 543 | H 30 | py    | Ryd( 2p) | 0.00035 | 1.38674  |
| 544 | H 30 | pz    | Ryd( 2p) | 0.00034 | 1.34786  |
| 545 | H 31 | s     | Val( 1s) | 0.76554 | 0.02359  |
| 546 | H 31 | s     | Ryd( 2s) | 0.00035 | 1.59988  |
| 547 | H 31 | s     | Ryd( 3s) | 0.00019 | 2.14183  |
| 548 | H 31 | px    | Ryd( 2p) | 0.00038 | 2.08268  |
| 549 | H 31 | py    | Ryd( 2p) | 0.00050 | 2.09584  |
| 550 | H 31 | pz    | Ryd( 2p) | 0.00014 | 1.61886  |
| 551 | H 32 | s     | Val( 1s) | 0.78249 | 0.05509  |
| 552 | H 32 | s     | Ryd( 3s) | 0.00109 | 1.81774  |
| 553 | H 32 | s     | Ryd( 2s) | 0.00053 | 1.81631  |
| 554 | H 32 | px    | Ryd( 2p) | 0.00051 | 2.17526  |
| 555 | H 32 | py    | Ryd( 2p) | 0.00029 | 1.42433  |
| 556 | H 32 | pz    | Ryd( 2p) | 0.00040 | 2.46388  |
| 557 | H 33 | s     | Val( 1s) | 0.78259 | 0.05710  |
| 558 | H 33 | s     | Ryd( 3s) | 0.00109 | 1.82693  |
| 559 | H 33 | s     | Ryd( 2s) | 0.00052 | 1.81340  |
| 560 | H 33 | px    | Ryd( 2p) | 0.00064 | 3.44765  |
| 561 | H 33 | py    | Ryd( 2p) | 0.00028 | 1.39408  |
| 562 | H 33 | pz    | Ryd( 2p) | 0.00028 | 1.35489  |
| 563 | H 34 | s     | Val( 1s) | 0.78168 | 0.04764  |
| 564 | H 34 | s     | Ryd( 3s) | 0.00044 | 2.04171  |
| 565 | H 34 | s     | Ryd( 2s) | 0.00022 | 1.83489  |
| 566 | H 34 | px    | Ryd( 2p) | 0.00028 | 2.78997  |
| 567 | H 34 | py    | Ryd( 2p) | 0.00040 | 1.58254  |
| 568 | H 34 | pz    | Ryd( 2p) | 0.00042 | 1.64173  |
| 569 | H 35 | s     | Val( 1s) | 0.78184 | 0.04896  |
| 570 | H 35 | s     | Ryd( 3s) | 0.00036 | 1.78555  |
| 571 | H 35 | s     | Ryd( 2s) | 0.00015 | 2.26444  |
| 572 | H 35 | px    | Ryd( 2p) | 0.00007 | 1.50807  |
| 573 | H 35 | py    | Ryd( 2p) | 0.00046 | 2.28010  |
| 574 | H 35 | pz    | Ryd( 2p) | 0.00047 | 2.21451  |
| 575 | H 36 | s     | Val( 1s) | 0.78119 | 0.04742  |
| 576 | H 36 | s     | Ryd( 3s) | 0.00036 | 1.77619  |
| 577 | H 36 | s     | Ryd( 2s) | 0.00015 | 2.26167  |
| 578 | H 36 | px    | Ryd( 2p) | 0.00041 | 2.19871  |
| 579 | H 36 | py    | Ryd( 2p) | 0.00046 | 2.29757  |
| 580 | H 36 | pz    | Ryd( 2p) | 0.00011 | 1.47325  |
| 581 | H 37 | s     | Val( 1s) | 0.77189 | 0.02091  |
| 582 | H 37 | s     | Ryd( 2s) | 0.00040 | 1.92013  |
| 583 | H 37 | s     | Ryd( 3s) | 0.00018 | 2.09957  |
| 584 | H 37 | px    | Ryd( 2p) | 0.00035 | 2.36668  |
| 585 | H 37 | py    | Ryd( 2p) | 0.00025 | 1.32869  |
| 586 | H 37 | pz    | Ryd( 2p) | 0.00021 | 2.07240  |

|     |      |       |          |         |           |
|-----|------|-------|----------|---------|-----------|
| 587 | H 38 | s     | Val( 1s) | 0.77468 | 0.02118   |
| 588 | H 38 | s     | Ryd( 3s) | 0.00043 | 1.98019   |
| 589 | H 38 | s     | Ryd( 2s) | 0.00022 | 1.65574   |
| 590 | H 38 | px    | Ryd( 2p) | 0.00021 | 1.31936   |
| 591 | H 38 | py    | Ryd( 2p) | 0.00030 | 1.46868   |
| 592 | H 38 | pz    | Ryd( 2p) | 0.00054 | 3.62506   |
| 593 | H 39 | s     | Val( 1s) | 0.79497 | 0.03354   |
| 594 | H 39 | s     | Ryd( 3s) | 0.00049 | 1.99075   |
| 595 | H 39 | s     | Ryd( 2s) | 0.00024 | 1.57199   |
| 596 | H 39 | px    | Ryd( 2p) | 0.00044 | 2.27447   |
| 597 | H 39 | py    | Ryd( 2p) | 0.00035 | 1.40861   |
| 598 | H 39 | pz    | Ryd( 2p) | 0.00045 | 2.82908   |
| 599 | H 40 | s     | Val( 1s) | 0.78127 | 0.04566   |
| 600 | H 40 | s     | Ryd( 3s) | 0.00043 | 2.03459   |
| 601 | H 40 | s     | Ryd( 2s) | 0.00022 | 1.63022   |
| 602 | H 40 | px    | Ryd( 2p) | 0.00029 | 1.20639   |
| 603 | H 40 | py    | Ryd( 2p) | 0.00039 | 1.55771   |
| 604 | H 40 | pz    | Ryd( 2p) | 0.00042 | 3.24280   |
| 605 | H 41 | s     | Val( 1s) | 0.77341 | 0.02515   |
| 606 | H 41 | s     | Ryd( 2s) | 0.00040 | 1.95157   |
| 607 | H 41 | s     | Ryd( 3s) | 0.00018 | 2.20707   |
| 608 | H 41 | px    | Ryd( 2p) | 0.00033 | 3.02126   |
| 609 | H 41 | py    | Ryd( 2p) | 0.00025 | 1.31950   |
| 610 | H 41 | pz    | Ryd( 2p) | 0.00024 | 1.45240   |
| 611 | H 42 | s     | Val( 1s) | 0.76647 | 0.03011   |
| 612 | H 42 | s     | Ryd( 2s) | 0.00035 | 1.62831   |
| 613 | H 42 | s     | Ryd( 3s) | 0.00019 | 2.18285   |
| 614 | H 42 | px    | Ryd( 2p) | 0.00004 | 1.41333   |
| 615 | H 42 | py    | Ryd( 2p) | 0.00049 | 2.13452   |
| 616 | H 42 | pz    | Ryd( 2p) | 0.00047 | 2.28609   |
| 617 | H 43 | s     | Val( 1s) | 0.51583 | 0.16839   |
| 618 | H 43 | s     | Ryd( 3s) | 0.00145 | 1.63220   |
| 619 | H 43 | s     | Ryd( 2s) | 0.00038 | 1.61722   |
| 620 | H 43 | px    | Ryd( 2p) | 0.00047 | 3.01099   |
| 621 | H 43 | py    | Ryd( 2p) | 0.00060 | 2.18485   |
| 622 | H 43 | pz    | Ryd( 2p) | 0.00100 | 1.89318   |
| 623 | O 44 | s     | Cor( 1s) | 1.99980 | -18.58320 |
| 624 | O 44 | s     | Val( 2s) | 1.71237 | -0.91346  |
| 625 | O 44 | s     | Ryd( 3s) | 0.00203 | 1.98450   |
| 626 | O 44 | s     | Ryd( 4s) | 0.00003 | 10.57181  |
| 627 | O 44 | s     | Ryd( 5s) | 0.00000 | 65.08831  |
| 628 | O 44 | s     | Ryd( 6s) | 0.00000 | 100.67315 |
| 629 | O 44 | px    | Val( 2p) | 1.53954 | -0.28215  |
| 630 | O 44 | px    | Ryd( 3p) | 0.00216 | 0.74789   |
| 631 | O 44 | px    | Ryd( 4p) | 0.00002 | 4.60533   |
| 632 | O 44 | py    | Val( 2p) | 1.57688 | -0.30766  |
| 633 | O 44 | py    | Ryd( 3p) | 0.00207 | 0.79491   |
| 634 | O 44 | py    | Ryd( 4p) | 0.00007 | 5.35629   |
| 635 | O 44 | pz    | Val( 2p) | 1.57532 | -0.30914  |
| 636 | O 44 | pz    | Ryd( 3p) | 0.00191 | 0.83263   |
| 637 | O 44 | pz    | Ryd( 4p) | 0.00007 | 5.36618   |
| 638 | O 44 | dxy   | Ryd( 3d) | 0.00319 | 1.35176   |
| 639 | O 44 | dxz   | Ryd( 3d) | 0.00326 | 1.34837   |
| 640 | O 44 | dyz   | Ryd( 3d) | 0.00974 | 1.88767   |
| 641 | O 44 | dx2y2 | Ryd( 3d) | 0.00382 | 1.40920   |
| 642 | O 44 | dz2   | Ryd( 3d) | 0.00529 | 1.50009   |
| 643 | O 45 | s     | Cor( 1s) | 1.99990 | -18.60336 |
| 644 | O 45 | s     | Val( 2s) | 1.78244 | -0.84156  |
| 645 | O 45 | s     | Ryd( 3s) | 0.00327 | 4.64964   |
| 646 | O 45 | s     | Ryd( 4s) | 0.00006 | 5.26175   |
| 647 | O 45 | s     | Ryd( 5s) | 0.00000 | 76.50250  |
| 648 | O 45 | s     | Ryd( 6s) | 0.00000 | 92.24406  |
| 649 | O 45 | px    | Val( 2p) | 1.63930 | -0.23588  |
| 650 | O 45 | px    | Ryd( 3p) | 0.00601 | 1.91732   |
| 651 | O 45 | px    | Ryd( 4p) | 0.00003 | 5.01218   |
| 652 | O 45 | py    | Val( 2p) | 1.75598 | -0.25954  |
| 653 | O 45 | py    | Ryd( 3p) | 0.00424 | 2.15953   |
| 654 | O 45 | py    | Ryd( 4p) | 0.00003 | 4.21390   |
| 655 | O 45 | pz    | Val( 2p) | 1.82723 | -0.24367  |
| 656 | O 45 | pz    | Ryd( 3p) | 0.00544 | 1.19983   |
| 657 | O 45 | pz    | Ryd( 4p) | 0.00002 | 4.52438   |
| 658 | O 45 | dxy   | Ryd( 3d) | 0.00097 | 1.92987   |
| 659 | O 45 | dxz   | Ryd( 3d) | 0.00173 | 2.03190   |
| 660 | O 45 | dyz   | Ryd( 3d) | 0.00045 | 2.20515   |
| 661 | O 45 | dx2y2 | Ryd( 3d) | 0.00235 | 2.16929   |
| 662 | O 45 | dz2   | Ryd( 3d) | 0.00076 | 1.69235   |
| 663 | O 46 | s     | Cor( 1s) | 1.99980 | -18.58750 |
| 664 | O 46 | s     | Val( 2s) | 1.71160 | -0.91600  |
| 665 | O 46 | s     | Ryd( 3s) | 0.00258 | 2.38119   |
| 666 | O 46 | s     | Ryd( 4s) | 0.00004 | 9.18114   |
| 667 | O 46 | s     | Ryd( 5s) | 0.00000 | 68.23529  |
| 668 | O 46 | s     | Ryd( 6s) | 0.00000 | 98.26460  |
| 669 | O 46 | px    | Val( 2p) | 1.58351 | -0.32340  |
| 670 | O 46 | px    | Ryd( 3p) | 0.00160 | 0.65791   |
| 671 | O 46 | px    | Ryd( 4p) | 0.00008 | 5.49801   |
| 672 | O 46 | py    | Val( 2p) | 1.56297 | -0.30203  |
| 673 | O 46 | py    | Ryd( 3p) | 0.00218 | 0.75431   |
| 674 | O 46 | py    | Ryd( 4p) | 0.00004 | 5.07414   |
| 675 | O 46 | pz    | Val( 2p) | 1.55826 | -0.29341  |
| 676 | O 46 | pz    | Ryd( 3p) | 0.00230 | 0.74366   |
| 677 | O 46 | pz    | Ryd( 4p) | 0.00003 | 4.80897   |
| 678 | O 46 | dxy   | Ryd( 3d) | 0.00794 | 1.64920   |
| 679 | O 46 | dxz   | Ryd( 3d) | 0.00587 | 1.51337   |
| 680 | O 46 | dyz   | Ryd( 3d) | 0.00302 | 1.33477   |
| 681 | O 46 | dx2y2 | Ryd( 3d) | 0.00576 | 1.49910   |
| 682 | O 46 | dz2   | Ryd( 3d) | 0.00338 | 1.34159   |
| 683 | O 47 | s     | Cor( 1s) | 1.99980 | -18.58476 |
| 684 | O 47 | s     | Val( 2s) | 1.71241 | -0.91540  |
| 685 | O 47 | s     | Ryd( 3s) | 0.00201 | 1.97681   |
| 686 | O 47 | s     | Ryd( 4s) | 0.00003 | 10.31312  |
| 687 | O 47 | s     | Ryd( 5s) | 0.00000 | 64.97825  |
| 688 | O 47 | s     | Ryd( 6s) | 0.00000 | 100.66455 |
| 689 | O 47 | px    | Val( 2p) | 1.55320 | -0.30291  |
| 690 | O 47 | px    | Ryd( 3p) | 0.00183 | 0.64588   |
| 691 | O 47 | px    | Ryd( 4p) | 0.00005 | 5.06633   |
| 692 | O 47 | py    | Val( 2p) | 1.57566 | -0.31180  |

|     |    |    |       |           |         |             |
|-----|----|----|-------|-----------|---------|-------------|
| 693 | O  | 47 | py    | Ryd( 3p)  | 0.00207 | 0.60675     |
| 694 | O  | 47 | py    | Ryd( 4p)  | 0.00007 | 5.29781     |
| 695 | O  | 47 | pz    | Val( 2p)  | 1.56178 | -0.29515    |
| 696 | O  | 47 | pz    | Ryd( 3p)  | 0.00222 | 0.70875     |
| 697 | O  | 47 | pz    | Ryd( 4p)  | 0.00004 | 4.89533     |
| 698 | O  | 47 | dxy   | Ryd( 3d)  | 0.00722 | 1.57749     |
| 699 | O  | 47 | dxz   | Ryd( 3d)  | 0.00423 | 1.40050     |
| 700 | O  | 47 | dyz   | Ryd( 3d)  | 0.00567 | 1.50969     |
| 701 | O  | 47 | dx2y2 | Ryd( 3d)  | 0.00484 | 1.45189     |
| 702 | O  | 47 | dz2   | Ryd( 3d)  | 0.00338 | 1.34894     |
| 703 | O  | 48 | s     | Cor( 1s)  | 1.99980 | -18.58676   |
| 704 | O  | 48 | s     | Val( 2s)  | 1.71094 | -0.91335    |
| 705 | O  | 48 | s     | Ryd( 3s)  | 0.00262 | 2.40405     |
| 706 | O  | 48 | s     | Ryd( 4s)  | 0.00004 | 9.30062     |
| 707 | O  | 48 | s     | Ryd( 5s)  | 0.00000 | 69.75610    |
| 708 | O  | 48 | s     | Ryd( 6s)  | 0.00000 | 96.90612    |
| 709 | O  | 48 | px    | Val( 2p)  | 1.59258 | -0.31166    |
| 710 | O  | 48 | px    | Ryd( 3p)  | 0.00215 | 0.95927     |
| 711 | O  | 48 | px    | Ryd( 4p)  | 0.00007 | 5.37567     |
| 712 | O  | 48 | py    | Val( 2p)  | 1.56307 | -0.29882    |
| 713 | O  | 48 | py    | Ryd( 3p)  | 0.00225 | 0.80613     |
| 714 | O  | 48 | py    | Ryd( 4p)  | 0.00004 | 5.05541     |
| 715 | O  | 48 | pz    | Val( 2p)  | 1.55755 | -0.29933    |
| 716 | O  | 48 | pz    | Ryd( 3p)  | 0.00191 | 0.82439     |
| 717 | O  | 48 | pz    | Ryd( 4p)  | 0.00004 | 5.00389     |
| 718 | O  | 48 | dxy   | Ryd( 3d)  | 0.00639 | 1.57680     |
| 719 | O  | 48 | dxz   | Ryd( 3d)  | 0.00691 | 1.63970     |
| 720 | O  | 48 | dyz   | Ryd( 3d)  | 0.00427 | 1.43247     |
| 721 | O  | 48 | dx2y2 | Ryd( 3d)  | 0.00455 | 1.45158     |
| 722 | O  | 48 | dz2   | Ryd( 3d)  | 0.00386 | 1.37949     |
| 723 | N  | 49 | s     | Cor( 1s)  | 1.99947 | -13.88797   |
| 724 | N  | 49 | s     | Val( 2s)  | 1.32977 | -0.52139    |
| 725 | N  | 49 | s     | Ryd( 3s)  | 0.00507 | 5.06348     |
| 726 | N  | 49 | s     | Ryd( 4s)  | 0.00018 | 15.26726    |
| 727 | N  | 49 | s     | Ryd( 5s)  | 0.00001 | 26.89017    |
| 728 | N  | 49 | s     | Ryd( 6s)  | 0.00000 | 48.87008    |
| 729 | N  | 49 | px    | Val( 2p)  | 1.42916 | -0.23392    |
| 730 | N  | 49 | px    | Ryd( 3p)  | 0.01288 | 1.97926     |
| 731 | N  | 49 | px    | Ryd( 4p)  | 0.00011 | 5.24065     |
| 732 | N  | 49 | py    | Val( 2p)  | 1.28803 | -0.21553    |
| 733 | N  | 49 | py    | Ryd( 3p)  | 0.00734 | 1.28079     |
| 734 | N  | 49 | py    | Ryd( 4p)  | 0.00008 | 4.87151     |
| 735 | N  | 49 | pz    | Val( 2p)  | 1.29723 | -0.21755    |
| 736 | N  | 49 | pz    | Ryd( 3p)  | 0.00801 | 1.36436     |
| 737 | N  | 49 | pz    | Ryd( 4p)  | 0.00009 | 4.92110     |
| 738 | N  | 49 | dxy   | Ryd( 3d)  | 0.00125 | 2.27502     |
| 739 | N  | 49 | dxz   | Ryd( 3d)  | 0.00105 | 2.35715     |
| 740 | N  | 49 | dyz   | Ryd( 3d)  | 0.00180 | 2.92403     |
| 741 | N  | 49 | dx2y2 | Ryd( 3d)  | 0.00135 | 2.45844     |
| 742 | N  | 49 | dz2   | Ryd( 3d)  | 0.00109 | 2.03466     |
| 743 | N  | 50 | s     | Cor( 1s)  | 1.99947 | -13.89466   |
| 744 | N  | 50 | s     | Val( 2s)  | 1.33290 | -0.52900    |
| 745 | N  | 50 | s     | Ryd( 3s)  | 0.00504 | 5.11161     |
| 746 | N  | 50 | s     | Ryd( 4s)  | 0.00018 | 15.00017    |
| 747 | N  | 50 | s     | Ryd( 5s)  | 0.00001 | 26.88676    |
| 748 | N  | 50 | s     | Ryd( 6s)  | 0.00000 | 49.04265    |
| 749 | N  | 50 | px    | Val( 2p)  | 1.40856 | -0.23966    |
| 750 | N  | 50 | px    | Ryd( 3p)  | 0.01102 | 1.26536     |
| 751 | N  | 50 | px    | Ryd( 4p)  | 0.00009 | 4.94670     |
| 752 | N  | 50 | py    | Val( 2p)  | 1.28858 | -0.22073    |
| 753 | N  | 50 | py    | Ryd( 3p)  | 0.00745 | 1.23267     |
| 754 | N  | 50 | py    | Ryd( 4p)  | 0.00008 | 4.85805     |
| 755 | N  | 50 | pz    | Val( 2p)  | 1.31662 | -0.22097    |
| 756 | N  | 50 | pz    | Ryd( 3p)  | 0.01022 | 1.61512     |
| 757 | N  | 50 | pz    | Ryd( 4p)  | 0.00012 | 5.20699     |
| 758 | N  | 50 | dxy   | Ryd( 3d)  | 0.00188 | 2.59203     |
| 759 | N  | 50 | dxz   | Ryd( 3d)  | 0.00075 | 2.29551     |
| 760 | N  | 50 | dyz   | Ryd( 3d)  | 0.00118 | 2.51924     |
| 761 | N  | 50 | dx2y2 | Ryd( 3d)  | 0.00088 | 1.86375     |
| 762 | N  | 50 | dz2   | Ryd( 3d)  | 0.00201 | 2.60222     |
| 763 | Ru | 51 | s     | Cor( 1s)  | 2.00000 | -826.14408  |
| 764 | Ru | 51 | s     | Cor( 2s)  | 2.00000 | -113.66636  |
| 765 | Ru | 51 | s     | Cor( 3s)  | 1.99999 | -21.94853   |
| 766 | Ru | 51 | s     | Cor( 4s)  | 1.98721 | -4.60926    |
| 767 | Ru | 51 | s     | Val( 5s)  | 0.38637 | 0.20972     |
| 768 | Ru | 51 | s     | Ryd(10s)  | 0.00453 | 46.59597    |
| 769 | Ru | 51 | s     | Ryd( 8s)  | 0.00057 | 30.02883    |
| 770 | Ru | 51 | s     | Ryd( 6s)  | 0.00036 | 10.64812    |
| 771 | Ru | 51 | s     | Ryd( 7s)  | 0.00006 | 11.06266    |
| 772 | Ru | 51 | s     | Ryd(11s)  | 0.00002 | 75.82428    |
| 773 | Ru | 51 | s     | Ryd( 9s)  | 0.00001 | 32.80034    |
| 774 | Ru | 51 | s     | Ryd(13s)  | 0.00000 | 332.21081   |
| 775 | Ru | 51 | s     | Ryd(15s)  | 0.00000 | 594.36871   |
| 776 | Ru | 51 | s     | Ryd(12s)  | 0.00000 | 88.72352    |
| 777 | Ru | 51 | s     | Ryd(14s)  | 0.00000 | 533.54949   |
| 778 | Ru | 51 | s     | Ryd(16s)  | 0.00000 | 2234.49284  |
| 779 | Ru | 51 | s     | Ryd(17s)  | 0.00000 | 9406.01501  |
| 780 | Ru | 51 | s     | Ryd(18s)  | 0.00000 | 37513.56841 |
| 781 | Ru | 51 | px    | Cor( 2p)  | 2.00000 | -91.91771   |
| 782 | Ru | 51 | px    | Cor( 3p)  | 2.00000 | -28.68760   |
| 783 | Ru | 51 | px    | Cor( 4p)  | 2.00000 | -1.84236    |
| 784 | Ru | 51 | px    | Ryd( 5p)  | 0.00348 | 4.85735     |
| 785 | Ru | 51 | px    | Ryd( 6p)  | 0.00087 | 7.13259     |
| 786 | Ru | 51 | px    | Ryd( 7p)  | 0.00015 | 12.63713    |
| 787 | Ru | 51 | px    | Ryd( 8p)  | 0.00000 | 50.46413    |
| 788 | Ru | 51 | px    | Ryd( 9p)  | 0.00000 | 186.18646   |
| 789 | Ru | 51 | px    | Ryd( 10p) | 2.00000 | -91.91809   |
| 790 | Ru | 51 | py    | Cor( 2p)  | 2.00000 | -28.68812   |
| 791 | Ru | 51 | py    | Cor( 3p)  | 2.00000 | -1.84653    |
| 792 | Ru | 51 | py    | Ryd( 4p)  | 0.00347 | 5.35523     |
| 793 | Ru | 51 | py    | Ryd( 5p)  | 0.00166 | 5.25990     |
| 794 | Ru | 51 | py    | Ryd( 6p)  | 0.00025 | 11.69108    |
| 795 | Ru | 51 | py    | Ryd( 7p)  | 0.00000 | 50.42420    |
| 796 | Ru | 51 | py    | Ryd( 8p)  | 0.00000 | 186.17289   |
| 797 | Ru | 51 | py    | Ryd( 9p)  | 2.00000 | -91.91778   |
| 798 | Ru | 51 | pz    | Cor( 2p)  | 2.00000 | -28.68776   |
| 799 | Ru | 51 | pz    | Cor( 3p)  | 2.00000 | -1.84418    |
| 800 | Ru | 51 | pz    | Ryd( 4p)  | 0.00370 | 3.98747     |
| 801 | Ru | 51 | pz    | Ryd( 5p)  | 0.00113 | 6.00346     |
| 802 | Ru | 51 | pz    | Ryd( 6p)  | 0.00009 | 12.23767    |
| 803 | Ru | 51 | pz    | Ryd( 7p)  | 0.00000 | 50.49099    |
| 804 | Ru | 51 | pz    | Ryd( 8p)  | 0.00000 | 186.18175   |

|     |    |    |       |     |       |         |             |
|-----|----|----|-------|-----|-------|---------|-------------|
| 805 | Ru | 51 | dxy   | Cor | (3d)  | 2.00000 | -10.09618   |
| 806 | Ru | 51 | dxy   | Val | (4d)  | 1.39438 | -0.21771    |
| 807 | Ru | 51 | dxy   | Ryd | (5d)  | 0.00595 | 0.90897     |
| 808 | Ru | 51 | dxy   | Ryd | (6d)  | 0.00028 | 5.15931     |
| 809 | Ru | 51 | dxy   | Ryd | (7d)  | 0.00001 | 19.25769    |
| 810 | Ru | 51 | dxy   | Ryd | (8d)  | 0.00000 | 53.83702    |
| 811 | Ru | 51 | dxz   | Cor | (3d)  | 2.00000 | -10.09584   |
| 812 | Ru | 51 | dxz   | Val | (4d)  | 1.45132 | -0.21822    |
| 813 | Ru | 51 | dxz   | Ryd | (5d)  | 0.00448 | 0.80374     |
| 814 | Ru | 51 | dxz   | Ryd | (6d)  | 0.00035 | 5.33941     |
| 815 | Ru | 51 | dxz   | Ryd | (7d)  | 0.00001 | 18.89545    |
| 816 | Ru | 51 | dxz   | Ryd | (8d)  | 0.00000 | 53.84835    |
| 817 | Ru | 51 | dyz   | Cor | (3d)  | 2.00000 | -10.09692   |
| 818 | Ru | 51 | dyz   | Val | (4d)  | 1.28541 | -0.23620    |
| 819 | Ru | 51 | dyz   | Ryd | (5d)  | 0.00642 | 0.94701     |
| 820 | Ru | 51 | dyz   | Ryd | (6d)  | 0.00075 | 5.81386     |
| 821 | Ru | 51 | dyz   | Ryd | (7d)  | 0.00002 | 19.14108    |
| 822 | Ru | 51 | dyz   | Ryd | (8d)  | 0.00000 | 53.82800    |
| 823 | Ru | 51 | dx2y2 | Cor | (3d)  | 2.00000 | -10.09520   |
| 824 | Ru | 51 | dx2y2 | Val | (4d)  | 1.58111 | -0.21668    |
| 825 | Ru | 51 | dx2y2 | Ryd | (5d)  | 0.00593 | 0.83882     |
| 826 | Ru | 51 | dx2y2 | Ryd | (6d)  | 0.00028 | 4.90223     |
| 827 | Ru | 51 | dx2y2 | Ryd | (7d)  | 0.00001 | 19.37973    |
| 828 | Ru | 51 | dx2y2 | Ryd | (8d)  | 0.00000 | 53.84397    |
| 829 | Ru | 51 | dz2   | Cor | (3d)  | 2.00000 | -10.09482   |
| 830 | Ru | 51 | dz2   | Val | (4d)  | 1.66119 | -0.21444    |
| 831 | Ru | 51 | dz2   | Ryd | (5d)  | 0.00505 | 0.64339     |
| 832 | Ru | 51 | dz2   | Ryd | (6d)  | 0.00039 | 4.34317     |
| 833 | Ru | 51 | dz2   | Ryd | (7d)  | 0.00000 | 19.58367    |
| 834 | Ru | 51 | dz2   | Ryd | (8d)  | 0.00000 | 53.84685    |
| 835 | Ru | 52 | s     | Cor | (1s)  | 2.00000 | -825.13894  |
| 836 | Ru | 52 | s     | Cor | (2s)  | 2.00000 | -114.72809  |
| 837 | Ru | 52 | s     | Cor | (3s)  | 1.99999 | -21.89620   |
| 838 | Ru | 52 | s     | Ryd | (7s)  | 1.98736 | -4.61197    |
| 839 | Ru | 52 | s     | Ryd | (10s) | 0.38552 | 0.07249     |
| 840 | Ru | 52 | s     | Val | (5s)  | 0.00458 | -7.20061    |
| 841 | Ru | 52 | s     | Ryd | (8s)  | 0.00059 | -3.86700    |
| 842 | Ru | 52 | s     | Ryd | (11s) | 0.00036 | 2.67799     |
| 843 | Ru | 52 | s     | Ryd | (9s)  | 0.00006 | -3.60145    |
| 844 | Ru | 52 | s     | Cor | (4s)  | 0.00002 | -17.85108   |
| 845 | Ru | 52 | s     | Ryd | (6s)  | 0.00001 | -6.47123    |
| 846 | Ru | 52 | s     | Ryd | (12s) | 0.00000 | 157.03710   |
| 847 | Ru | 52 | s     | Ryd | (16s) | 0.00000 | 3361.57197  |
| 848 | Ru | 52 | s     | Ryd | (14s) | 0.00000 | 776.76568   |
| 849 | Ru | 52 | s     | Ryd | (15s) | 0.00000 | 3154.32207  |
| 850 | Ru | 52 | s     | Ryd | (18s) | 0.00000 | 29463.38953 |
| 851 | Ru | 52 | s     | Ryd | (13s) | 0.00000 | 765.87255   |
| 852 | Ru | 52 | s     | Ryd | (17s) | 0.00000 | 12892.18483 |
| 853 | Ru | 52 | px    | Cor | (2p)  | 2.00000 | -91.94240   |
| 854 | Ru | 52 | px    | Cor | (3p)  | 2.00000 | -28.66704   |
| 855 | Ru | 52 | px    | Cor | (4p)  | 1.99252 | -1.84539    |
| 856 | Ru | 52 | px    | Ryd | (5p)  | 0.00363 | 4.37119     |
| 857 | Ru | 52 | px    | Ryd | (6p)  | 0.00092 | 6.69643     |
| 858 | Ru | 52 | px    | Ryd | (7p)  | 0.00013 | 12.37870    |
| 859 | Ru | 52 | px    | Ryd | (8p)  | 0.00000 | 50.26243    |
| 860 | Ru | 52 | px    | Ryd | (9p)  | 0.00000 | 186.27379   |
| 861 | Ru | 52 | py    | Cor | (2p)  | 2.00000 | -91.94220   |
| 862 | Ru | 52 | py    | Cor | (3p)  | 2.00000 | -28.66665   |
| 863 | Ru | 52 | py    | Cor | (4p)  | 1.99510 | -1.84714    |
| 864 | Ru | 52 | py    | Ryd | (5p)  | 0.00338 | 5.13471     |
| 865 | Ru | 52 | py    | Ryd | (6p)  | 0.00174 | 5.74075     |
| 866 | Ru | 52 | py    | Ryd | (7p)  | 0.00025 | 11.75663    |
| 867 | Ru | 52 | py    | Ryd | (8p)  | 0.00000 | 50.29525    |
| 868 | Ru | 52 | py    | Ryd | (9p)  | 0.00000 | 186.26530   |
| 869 | Ru | 52 | pz    | Cor | (2p)  | 2.00000 | -91.94148   |
| 870 | Ru | 52 | pz    | Cor | (3p)  | 2.00000 | -28.66563   |
| 871 | Ru | 52 | pz    | Cor | (4p)  | 1.99327 | -1.84195    |
| 872 | Ru | 52 | pz    | Ryd | (5p)  | 0.00373 | 4.12799     |
| 873 | Ru | 52 | pz    | Ryd | (6p)  | 0.00097 | 6.33433     |
| 874 | Ru | 52 | pz    | Ryd | (7p)  | 0.00010 | 12.64899    |
| 875 | Ru | 52 | pz    | Ryd | (8p)  | 0.00000 | 50.39941    |
| 876 | Ru | 52 | pz    | Ryd | (9p)  | 0.00000 | 186.28147   |
| 877 | Ru | 52 | dxy   | Cor | (3d)  | 2.00000 | -10.09768   |
| 878 | Ru | 52 | dxy   | Val | (4d)  | 1.41334 | -0.23194    |
| 879 | Ru | 52 | dxy   | Ryd | (5d)  | 0.00691 | 0.91656     |
| 880 | Ru | 52 | dxy   | Ryd | (6d)  | 0.00051 | 5.54178     |
| 881 | Ru | 52 | dxy   | Ryd | (7d)  | 0.00001 | 19.32222    |
| 882 | Ru | 52 | dxy   | Ryd | (8d)  | 0.00000 | 53.81640    |
| 883 | Ru | 52 | dxz   | Cor | (3d)  | 2.00000 | -10.09661   |
| 884 | Ru | 52 | dxz   | Val | (4d)  | 1.49866 | -0.22029    |
| 885 | Ru | 52 | dxz   | Ryd | (5d)  | 0.00566 | 0.86184     |
| 886 | Ru | 52 | dxz   | Ryd | (6d)  | 0.00046 | 5.01869     |
| 887 | Ru | 52 | dxz   | Ryd | (7d)  | 0.00001 | 19.25243    |
| 888 | Ru | 52 | dxz   | Ryd | (8d)  | 0.00000 | 53.82804    |
| 889 | Ru | 52 | dyz   | Cor | (3d)  | 2.00000 | -10.09742   |
| 890 | Ru | 52 | dyz   | Val | (4d)  | 1.25271 | -0.22436    |
| 891 | Ru | 52 | dyz   | Ryd | (5d)  | 0.00490 | 0.94132     |
| 892 | Ru | 52 | dyz   | Ryd | (6d)  | 0.00052 | 5.33226     |
| 893 | Ru | 52 | dyz   | Ryd | (7d)  | 0.00001 | 19.16229    |
| 894 | Ru | 52 | dyz   | Ryd | (8d)  | 0.00000 | 53.82446    |
| 895 | Ru | 52 | dx2y2 | Cor | (3d)  | 2.00000 | -10.09691   |
| 896 | Ru | 52 | dx2y2 | Val | (4d)  | 1.55595 | -0.21839    |
| 897 | Ru | 52 | dx2y2 | Ryd | (5d)  | 0.00567 | 0.75902     |
| 898 | Ru | 52 | dx2y2 | Ryd | (6d)  | 0.0025  | 4.57478     |
| 899 | Ru | 52 | dx2y2 | Ryd | (7d)  | 0.00001 | 19.45858    |
| 900 | Ru | 52 | dx2y2 | Ryd | (8d)  | 0.00000 | 53.83360    |
| 901 | Ru | 52 | dz2   | Cor | (3d)  | 2.00000 | -10.09524   |
| 902 | Ru | 52 | dz2   | Val | (4d)  | 1.65588 | -0.21201    |
| 903 | Ru | 52 | dz2   | Ryd | (5d)  | 0.00467 | 0.66897     |
| 904 | Ru | 52 | dz2   | Ryd | (6d)  | 0.00032 | 4.39148     |
| 905 | Ru | 52 | dz2   | Ryd | (7d)  | 0.00000 | 19.44140    |
| 906 | Ru | 52 | dz2   | Ryd | (8d)  | 0.00000 | 53.83748    |
| 907 | Cl | 53 | s     | Cor | (1s)  | 2.00000 | -100.50441  |
| 908 | Cl | 53 | s     | Cor | (2s)  | 1.99995 | -9.80790    |
| 909 | Cl | 53 | s     | Val | (3s)  | 1.90206 | -0.89889    |
| 910 | Cl | 53 | s     | Ryd | (3s)  | 0.00192 | 12.04731    |
| 911 | Cl | 53 | s     | Ryd | (4s)  | 0.00016 | 4.81208     |
| 912 | Cl | 53 | s     | Ryd | (4s)  | 0.00001 | 15.86877    |
| 913 | Cl | 53 | s     | Ryd | (5s)  | 0.00000 | 50.21575    |
| 914 | Cl | 53 | s     | Ryd | (7s)  | 0.00000 | 170.23105   |
| 915 | Cl | 53 | px    | Cor | (2p)  | 1.99998 | -6.94301    |
| 916 | Cl | 53 | px    | Val | (3p)  | 1.89882 | -0.24488    |
| 917 | Cl | 53 | px    | Ryd | (3p)  | 0.00299 | 1.32708     |
| 918 | Cl | 53 | px    | Ryd | (5p)  | 0.00004 | 5.02368     |

|     |       |       |          |         |          |
|-----|-------|-------|----------|---------|----------|
| 919 | Cl 53 | px    | Ryd( 6p) | 0.00000 | 17.21284 |
| 920 | Cl 53 | py    | Cor( 2p) | 1.99994 | -6.94659 |
| 921 | Cl 53 | py    | Val( 3p) | 1.68790 | -0.24823 |
| 922 | Cl 53 | py    | Ryd( 4p) | 0.00145 | 2.28449  |
| 923 | Cl 53 | py    | Ryd( 5p) | 0.00006 | 5.74518  |
| 924 | Cl 53 | py    | Ryd( 6p) | 0.00000 | 17.05099 |
| 925 | Cl 53 | pz    | Cor( 2p) | 1.99996 | -6.94452 |
| 926 | Cl 53 | pz    | Val( 3p) | 1.81455 | -0.24597 |
| 927 | Cl 53 | pz    | Ryd( 4p) | 0.00250 | 2.25386  |
| 928 | Cl 53 | pz    | Ryd( 5p) | 0.00004 | 5.32336  |
| 929 | Cl 53 | pz    | Ryd( 6p) | 0.00000 | 17.18362 |
| 930 | Cl 53 | dxy   | Ryd( 3d) | 0.00158 | 0.97467  |
| 931 | Cl 53 | dxz   | Ryd( 3d) | 0.00168 | 1.01477  |
| 932 | Cl 53 | dyz   | Ryd( 3d) | 0.00221 | 1.00089  |
| 933 | Cl 53 | dx2y2 | Ryd( 3d) | 0.00132 | 0.88396  |
| 934 | Cl 53 | dz2   | Ryd( 3d) | 0.00167 | 0.84869  |

4 low occupancy (<1.9990e) core orbitals found on Ru 51  
4 low occupancy (<1.9990e) core orbitals found on Ru 52

Population inversion found on atom C 3  
Population inversion found on atom C 5  
Population inversion found on atom C 13  
Population inversion found on atom C 15  
Population inversion found on atom C 17  
Population inversion found on atom C 18  
Population inversion found on atom C 21  
Population inversion found on atom C 23  
Population inversion found on atom C 25  
Population inversion found on atom C 26  
Population inversion found on atom H 28  
Population inversion found on atom H 30  
Population inversion found on atom H 32  
Population inversion found on atom H 33  
Population inversion found on atom H 34  
Population inversion found on atom H 38  
Population inversion found on atom H 39  
Population inversion found on atom H 40  
Population inversion found on atom H 43  
Population inversion found on atom Ru 51  
Population inversion found on atom Ru 52  
Population inversion found on atom Cl 53

Summary of Natural Population Analysis:

| Atom No   | Natural Charge | Natural Population |           |         | Total     |
|-----------|----------------|--------------------|-----------|---------|-----------|
|           |                | Core               | Valence   | Rydberg |           |
| C 1       | -0.25251       | 1.99935            | 4.24071   | 0.01245 | 6.25251   |
| C 2       | 0.03038        | 1.99935            | 3.94932   | 0.02096 | 5.96962   |
| C 3       | -0.16564       | 1.99938            | 4.15487   | 0.01138 | 6.16564   |
| C 4       | 0.59856        | 1.99944            | 3.35464   | 0.04736 | 5.40144   |
| C 5       | -0.22696       | 1.99929            | 4.21624   | 0.01143 | 6.22696   |
| C 6       | 0.60006        | 1.99945            | 3.35246   | 0.04802 | 5.39994   |
| C 7       | 0.20466        | 1.99926            | 3.77329   | 0.02279 | 5.79534   |
| C 8       | 0.59410        | 1.99944            | 3.35908   | 0.04738 | 5.40590   |
| C 9       | -0.14193       | 1.99918            | 4.12239   | 0.02036 | 6.14193   |
| C 10      | 0.57888        | 1.99945            | 3.37209   | 0.04958 | 5.42112   |
| C 11      | -0.03969       | 1.99907            | 4.00129   | 0.03932 | 6.03969   |
| C 12      | 0.03356        | 1.99935            | 3.94581   | 0.02128 | 5.96644   |
| C 13      | -0.18455       | 1.99930            | 4.17318   | 0.01207 | 6.18455   |
| C 14      | -0.25190       | 1.99934            | 4.24010   | 0.01246 | 6.25190   |
| C 15      | -0.26232       | 1.99930            | 4.24717   | 0.01585 | 6.26232   |
| C 16      | -0.03507       | 1.99908            | 3.99715   | 0.03884 | 6.03507   |
| C 17      | -0.23255       | 1.99937            | 4.22024   | 0.01295 | 6.23255   |
| C 18      | -0.26177       | 1.99930            | 4.24682   | 0.01565 | 6.26177   |
| C 19      | -0.19071       | 1.99937            | 4.17904   | 0.01230 | 6.19071   |
| C 20      | 0.20755        | 1.99926            | 3.77047   | 0.02273 | 5.79245   |
| C 21      | -0.16341       | 1.99938            | 4.15272   | 0.01132 | 6.16341   |
| C 22      | -0.14382       | 1.99918            | 4.12419   | 0.02044 | 6.14382   |
| C 23      | -0.22359       | 1.99929            | 4.21294   | 0.01136 | 6.22359   |
| C 24      | -0.18825       | 1.99937            | 4.17665   | 0.01224 | 6.18825   |
| C 25      | -0.18315       | 1.99930            | 4.17181   | 0.01204 | 6.18315   |
| C 26      | -0.23208       | 1.99937            | 4.21979   | 0.01292 | 6.23208   |
| H 27      | 0.24373        | 0.00000            | 0.75315   | 0.00313 | 0.75627   |
| H 28      | 0.22243        | 0.00000            | 0.77587   | 0.00171 | 0.77757   |
| H 29      | 0.20708        | 0.00000            | 0.78958   | 0.00334 | 0.79292   |
| H 30      | 0.20340        | 0.00000            | 0.79464   | 0.00197 | 0.79660   |
| H 31      | 0.23289        | 0.00000            | 0.76554   | 0.00157 | 0.76711   |
| H 32      | 0.21470        | 0.00000            | 0.78249   | 0.00281 | 0.78530   |
| H 33      | 0.21460        | 0.00000            | 0.78259   | 0.00281 | 0.78540   |
| H 34      | 0.21657        | 0.00000            | 0.78168   | 0.00175 | 0.78343   |
| H 35      | 0.21666        | 0.00000            | 0.78184   | 0.00151 | 0.78334   |
| H 36      | 0.21732        | 0.00000            | 0.78119   | 0.00150 | 0.78268   |
| H 37      | 0.22673        | 0.00000            | 0.77189   | 0.00138 | 0.77327   |
| H 38      | 0.22363        | 0.00000            | 0.77468   | 0.00169 | 0.77637   |
| H 39      | 0.20306        | 0.00000            | 0.79497   | 0.00197 | 0.79694   |
| H 40      | 0.21698        | 0.00000            | 0.78127   | 0.00175 | 0.78302   |
| H 41      | 0.22519        | 0.00000            | 0.77341   | 0.00141 | 0.77481   |
| H 42      | 0.23199        | 0.00000            | 0.76647   | 0.00154 | 0.76801   |
| H 43      | 0.48027        | 0.00000            | 0.51583   | 0.00389 | 0.51973   |
| O 44      | -1.03757       | 1.99980            | 6.40410   | 0.03367 | 8.43757   |
| O 45      | -0.43018       | 1.99990            | 7.00495   | 0.02533 | 9.03018   |
| O 46      | -0.45095       | 1.99980            | 6.41633   | 0.03483 | 8.45095   |
| O 47      | -0.43653       | 1.99980            | 6.40305   | 0.03368 | 8.43653   |
| O 48      | -0.45904       | 1.99980            | 6.42414   | 0.03511 | 8.45904   |
| N 49      | -0.38396       | 1.99947            | 5.34420   | 0.04029 | 7.38396   |
| N 50      | -0.38704       | 1.99947            | 5.34666   | 0.04090 | 7.38704   |
| Ru 51     | 0.22166        | 35.96829           | 7.75978   | 0.05027 | 43.77834  |
| Ru 52     | 0.21934        | 33.98089           | 7.38112   | 2.41865 | 43.78066  |
| Cl 53     | -0.32079       | 9.99982            | 7.30333   | 0.01764 | 17.32079  |
| * Total * | 0.00000        | 145.92925          | 182.72917 | 3.34158 | 332.00000 |

Natural Population

Core 145.92925 ( 98.6008% of 148)  
Valence 182.72917 ( 99.3093% of 184)  
Natural Minimal Basis 328.65842 ( 98.9935% of 332)  
Natural Rydberg Basis 3.34158 ( 1.0065% of 332)

Atom No Natural Electron Configuration

```

C 1 [core]2s( 1.01)2p( 3.23)3p( 0.01)
C 2 [core]2s( 0.97)2p( 2.98)3p( 0.01)
C 3 [core]2s( 1.01)2p( 3.14)3p( 0.01)
C 4 [core]2s( 1.16)2p( 2.19)3s( 0.02)3p( 0.02)
C 5 [core]2s( 1.00)2p( 3.21)3p( 0.01)
C 6 [core]2s( 1.19)2p( 2.17)3s( 0.02)3p( 0.02)
C 7 [core]2s( 0.91)2p( 2.87)3p( 0.02)
C 8 [core]2s( 1.17)2p( 2.19)3s( 0.02)3p( 0.02)
C 9 [core]2s( 0.95)2p( 3.17)3p( 0.01)
C 10 [core]2s( 1.19)2p( 2.18)3s( 0.02)3p( 0.02)
C 11 [core]2s( 1.03)2p( 2.97)3s( 0.01)3p( 0.03)
C 12 [core]2s( 0.96)2p( 2.98)3p( 0.01)
C 13 [core]2s( 0.99)2p( 3.18)3p( 0.01)
C 14 [core]2s( 1.01)2p( 3.23)3p( 0.01)
C 15 [core]2s( 1.01)2p( 3.24)3p( 0.01)
C 16 [core]2s( 1.03)2p( 2.97)3s( 0.01)3p( 0.03)
C 17 [core]2s( 1.00)2p( 3.22)3p( 0.01)
C 18 [core]2s( 1.01)2p( 3.24)3p( 0.01)
C 19 [core]2s( 1.01)2p( 3.17)3p( 0.01)
C 20 [core]2s( 0.91)2p( 2.86)3p( 0.02)
C 21 [core]2s( 1.01)2p( 3.14)3p( 0.01)
C 22 [core]2s( 0.95)2p( 3.17)3p( 0.01)
C 23 [core]2s( 1.00)2p( 3.21)3p( 0.01)
C 24 [core]2s( 1.01)2p( 3.17)3p( 0.01)
C 25 [core]2s( 0.99)2p( 3.18)3p( 0.01)
C 26 [core]2s( 1.00)2p( 3.22)3p( 0.01)
H 27 1s( 0.75)
H 28 1s( 0.78)
H 29 1s( 0.79)
H 30 1s( 0.79)
H 31 1s( 0.77)
H 32 1s( 0.78)
H 33 1s( 0.78)
H 34 1s( 0.78)
H 35 1s( 0.78)
H 36 1s( 0.78)
H 37 1s( 0.77)
H 38 1s( 0.77)
H 39 1s( 0.79)
H 40 1s( 0.78)
H 41 1s( 0.77)
H 42 1s( 0.77)
H 43 1s( 0.52)
O 44 [core]2s( 1.71)2p( 4.69)3p( 0.01)3d( 0.03)
O 45 [core]2s( 1.78)2p( 5.22)3p( 0.02)3d( 0.01)
O 46 [core]2s( 1.71)2p( 4.70)3p( 0.01)3d( 0.03)
O 47 [core]2s( 1.71)2p( 4.69)3p( 0.01)3d( 0.03)
O 48 [core]2s( 1.71)2p( 4.71)3p( 0.01)3d( 0.03)
N 49 [core]2s( 1.33)2p( 4.01)3s( 0.01)3p( 0.03)3d( 0.01)
N 50 [core]2s( 1.33)2p( 4.01)3s( 0.01)3p( 0.03)3d( 0.01)
Ru 51 [core]5s( 0.39)4d( 7.37)5p( 0.01)5d( 0.03)6p( 0.01)
Ru 52 [core]4d( 7.38)5p( 0.01)5d( 0.03)7s( 1.99)
Cl 53 [core]3s( 1.90)3p( 5.40)3d( 0.01)4p( 0.01)
    
```

\*\*\* sorry: cannot construct NLMOMO matrix.  
 \*\*\* AOMO matrix not available

NATURAL BOND ORBITAL ANALYSIS:

| Cycle | Occ. Thresh. | Occupancies |           | Lewis Structure |    |    |    | Low occ (L) | High occ (NL) | Dev  |
|-------|--------------|-------------|-----------|-----------------|----|----|----|-------------|---------------|------|
|       |              | Lewis       | Non-Lewis | CR              | BD | 3C | LP |             |               |      |
| 1(1)  | 1.90         | 319.10127   | 12.89873  | 74              | 70 | 11 | 11 | 21          | 23            | 0.47 |
| 2(2)  | 1.90         | 319.89449   | 12.10551  | 74              | 70 | 14 | 8  | 20          | 22            | 0.41 |
| 3(3)  | 1.90         | 319.89449   | 12.10551  | 74              | 70 | 14 | 8  | 20          | 22            | 0.41 |
| 4(1)  | 1.80         | 318.49424   | 13.50576  | 74              | 66 | 11 | 15 | 19          | 22            | 1.08 |
| 5(2)  | 1.80         | 318.85773   | 13.14227  | 74              | 68 | 12 | 12 | 16          | 21            | 1.06 |
| 6(3)  | 1.80         | 319.18186   | 12.81814  | 74              | 70 | 11 | 11 | 13          | 20            | 0.44 |
| 7(4)  | 1.80         | 319.20260   | 12.79740  | 74              | 70 | 11 | 11 | 13          | 20            | 0.47 |
| 8(5)  | 1.80         | 319.20260   | 12.79740  | 74              | 70 | 11 | 11 | 13          | 20            | 0.47 |
| 9(6)  | 1.80         | 319.25159   | 12.74841  | 74              | 68 | 14 | 10 | 12          | 21            | 0.47 |
| 10(7) | 1.80         | 319.25159   | 12.74841  | 74              | 68 | 14 | 10 | 12          | 21            | 0.47 |
| 11(8) | 1.80         | 319.25159   | 12.74841  | 74              | 68 | 14 | 10 | 12          | 21            | 0.47 |
| 12(9) | 1.80         | 319.25159   | 12.74841  | 74              | 68 | 14 | 10 | 12          | 21            | 0.47 |
| 13(1) | 1.70         | 319.74547   | 12.25453  | 74              | 67 | 9  | 16 | 11          | 27            | 0.47 |
| 14(2) | 1.70         | 319.41535   | 12.58465  | 74              | 67 | 10 | 15 | 11          | 28            | 0.45 |
| 15(3) | 1.70         | 320.30411   | 11.69589  | 74              | 67 | 10 | 15 | 10          | 25            | 0.45 |
| 16(4) | 1.70         | 319.73427   | 12.26573  | 74              | 67 | 9  | 16 | 11          | 28            | 0.47 |
| 17(5) | 1.70         | 319.19574   | 12.80426  | 74              | 67 | 10 | 15 | 11          | 29            | 0.47 |
| 18(6) | 1.70         | 319.15628   | 12.84372  | 74              | 67 | 10 | 15 | 11          | 29            | 0.45 |
| 19(7) | 1.70         | 320.04503   | 11.95497  | 74              | 67 | 10 | 15 | 10          | 26            | 0.45 |
| 20(8) | 1.70         | 319.69481   | 12.30519  | 74              | 67 | 9  | 16 | 11          | 28            | 0.47 |
| 21(9) | 1.70         | 319.15628   | 12.84372  | 74              | 67 | 10 | 15 | 11          | 29            | 0.45 |
| 22(1) | 1.60         | 322.06906   | 9.93094   | 74              | 72 | 0  | 20 | 1           | 26            | 0.47 |
| 23(2) | 1.60         | 321.53946   | 10.46054  | 74              | 71 | 0  | 21 | 2           | 26            | 0.44 |
| 24(3) | 1.60         | 321.59640   | 10.40360  | 74              | 71 | 0  | 21 | 2           | 26            | 0.43 |
| 25(4) | 1.60         | 321.53946   | 10.46054  | 74              | 71 | 0  | 21 | 2           | 26            | 0.44 |
| 26(5) | 1.60         | 321.59640   | 10.40360  | 74              | 71 | 0  | 21 | 2           | 26            | 0.43 |
| 27(6) | 1.60         | 321.53946   | 10.46054  | 74              | 71 | 0  | 21 | 2           | 26            | 0.44 |
| 28(7) | 1.60         | 321.59640   | 10.40360  | 74              | 71 | 0  | 21 | 2           | 26            | 0.43 |
| 29(8) | 1.60         | 321.53946   | 10.46054  | 74              | 71 | 0  | 21 | 2           | 26            | 0.44 |
| 30(9) | 1.60         | 321.59640   | 10.40360  | 74              | 71 | 0  | 21 | 2           | 26            | 0.43 |
| 31(1) | 1.50         | 318.99399   | 13.00601  | 74              | 65 | 0  | 27 | 0           | 26            | 1.09 |
| 32(2) | 1.50         | 318.99399   | 13.00601  | 74              | 65 | 0  | 27 | 0           | 26            | 1.09 |
| 33(1) | 1.60         | 322.06906   | 9.93094   | 74              | 72 | 0  | 20 | 1           | 26            | 0.47 |

Strongly delocalized structure accepted

4 low occupancy (<1.9990e) core orbitals found on Ru51  
 4 low occupancy (<1.9990e) core orbitals found on Ru52

|                   |                             |
|-------------------|-----------------------------|
| Core              | 147.91566 ( 99.943% of 148) |
| Valence Lewis     | 174.15340 ( 94.649% of 184) |
| Total Lewis       | 322.06906 ( 97.009% of 332) |
| Valence non-Lewis | 9.31359 ( 2.805% of 332)    |
| Rydberg non-Lewis | 0.61735 ( 0.186% of 332)    |
| Total non-Lewis   | 9.93094 ( 2.991% of 332)    |

| (Occupancy)                | Bond orbital/          | Coefficients/                           | Hybrids                                                                                                                                                                                                        |
|----------------------------|------------------------|-----------------------------------------|----------------------------------------------------------------------------------------------------------------------------------------------------------------------------------------------------------------|
| 1. (1.98282)<br>( 50.18%)  | BD ( 1) C<br>0.7084* C | 1- C 2                                  | 1 s( 34.70%)p 1.88( 65.21%)d 0.00( 0.09%)<br>0.0000 0.5890 -0.0011 0.0051 -0.0002<br>0.0001 -0.7039 0.0245 0.0019 0.2495<br>0.0042 -0.0027 0.3063 0.0027 -0.0048<br>-0.0151 -0.0185 0.0091 0.0152 -0.0068      |
| ( 49.82%)                  | 0.7058* C              | 2                                       | 2 s( 37.50%)p 1.66( 62.40%)d 0.00( 0.09%)<br>-0.0001 0.6124 0.0048 0.0039 -0.0001<br>0.0001 0.6705 0.0114 0.0009 -0.2592<br>0.0162 -0.0030 -0.3266 0.0147 -0.0057<br>-0.0138 -0.0172 0.0053 0.0180 -0.0087     |
| 2. (1.63590)<br>( 54.15%)  | BD ( 2) C<br>0.7358* C | 1- C 2                                  | 1 s( 0.00%)p 1.00( 99.97%)d 0.00( 0.03%)<br>0.0000 -0.0004 0.0013 -0.0006 0.0000<br>-0.0001 0.0388 0.0004 0.0010 -0.7285<br>-0.0127 -0.0066 0.6834 0.0132 0.0067<br>0.0063 -0.0048 -0.0013 0.0080 0.0146       |
| ( 45.85%)                  | 0.6772* C              | 2                                       | 2 s( 0.00%)p 1.00( 99.96%)d 0.00( 0.04%)<br>0.0000 -0.0029 0.0002 -0.0010 0.0001<br>0.0000 0.0524 -0.0015 -0.0001 -0.7297<br>-0.0095 -0.0033 0.6812 0.0114 0.0052<br>-0.0151 0.0144 0.0013 0.0011 -0.0013      |
| 3. (1.98475)<br>( 49.97%)  | BD ( 1) C<br>0.7069* C | 1- C 3                                  | 1 s( 35.25%)p 1.83( 64.66%)d 0.00( 0.09%)<br>0.0000 0.5936 0.0088 0.0036 -0.0002<br>0.0001 0.7075 -0.0239 0.0016 0.2800<br>0.0069 -0.0036 0.2585 0.0080 -0.0039<br>0.0171 0.0161 0.0094 0.0149 -0.0088         |
| ( 50.03%)                  | 0.7073* C              | 3                                       | 3 s( 35.11%)p 1.85( 64.80%)d 0.00( 0.09%)<br>0.0000 0.5925 0.0056 0.0038 0.0001<br>0.0000 -0.6758 0.0014 0.0048 -0.3129<br>0.0172 -0.0001 -0.3044 0.0182 -0.0005<br>0.0155 0.0148 0.0072 0.0169 -0.0100        |
| 4. (1.97639)<br>( 61.61%)  | BD ( 1) C<br>0.7850* C | 1- H 42                                 | 1 s( 30.00%)p 2.33( 69.94%)d 0.00( 0.07%)<br>0.0004 -0.5476 0.0049 0.0080 -0.0003<br>0.0002 0.0099 -0.0023 -0.0035 0.5726<br>0.0037 -0.0050 0.6093 0.0073 -0.0031<br>-0.0011 -0.0010 -0.0225 0.0106 -0.0077    |
| ( 38.39%)                  | 0.6196* H 42           | s( 99.95%)p 0.00( 0.05%)                | -0.9997 -0.0019 0.0003 -0.0009 -0.0160<br>-0.0155                                                                                                                                                              |
| 5. (1.97198)<br>( 62.56%)  | BD ( 1) C<br>0.7909* C | 2- H 27                                 | 2 s( 30.88%)p 2.24( 69.06%)d 0.00( 0.06%)<br>0.0004 -0.5553 0.0188 0.0066 -0.0002<br>0.0002 0.7389 0.0130 -0.0110 0.2874<br>0.0017 -0.0036 0.2486 0.0058 0.0029<br>-0.0123 -0.0098 -0.0034 -0.0147 0.0098      |
| ( 37.44%)                  | 0.6119* H 27           | s( 99.89%)p 0.00( 0.11%)                | -0.9994 -0.0009 -0.0027 -0.0315 -0.0107<br>-0.0054                                                                                                                                                             |
| 6. (1.98610)<br>( 39.90%)  | BD ( 1) C<br>0.6316* C | 2- N 49                                 | 2 s( 31.64%)p 2.16( 68.27%)d 0.00( 0.09%)<br>0.0000 0.5620 0.0244 0.0034 -0.0002<br>0.0003 -0.0007 0.0148 -0.0024 0.5622<br>-0.0167 0.0053 0.6047 -0.0180 0.0043<br>0.0015 0.0018 0.0264 -0.0115 0.0084        |
| ( 60.10%)                  | 0.7753* N 49           | s( 35.46%)p 1.81( 64.37%)d 0.00( 0.17%) | -0.0001 0.5949 0.0280 -0.0010 0.0004<br>0.0000 -0.0024 -0.0157 -0.0027 -0.5492<br>-0.0129 -0.0017 -0.5843 -0.0155 -0.0018<br>-0.0073 -0.0086 0.0361 -0.0118 0.0108                                             |
| 7. (1.98395)<br>( 49.71%)  | BD ( 1) C<br>0.7051* C | 3- C 5                                  | 3 s( 35.51%)p 1.81( 64.40%)d 0.00( 0.09%)<br>0.0000 0.5958 0.0058 0.0039 0.0001<br>-0.0001 0.0041 -0.0199 0.0023 0.5453<br>-0.0124 -0.0038 0.5881 -0.0122 -0.0040<br>-0.0019 -0.0023 0.0269 -0.0109 0.0086     |
| ( 50.29%)                  | 0.7091* C              | 5                                       | 5 s( 35.94%)p 1.78( 63.97%)d 0.00( 0.09%)<br>0.0000 0.5993 0.0130 0.0032 0.0001<br>-0.0001 0.0386 -0.0207 0.0048 -0.5478<br>0.0065 0.0004 -0.5811 0.0080 0.0003<br>0.0012 0.0008 0.0271 -0.0104 0.0079         |
| 8. (1.66321)<br>( 47.95%)  | BD ( 2) C<br>0.6925* C | 3- C 5                                  | 3 s( 0.00%)p 1.00( 99.96%)d 0.00( 0.04%)<br>0.0000 -0.0009 0.0009 -0.0002 0.0000<br>0.0000 0.0321 0.0004 0.0003 -0.7323<br>-0.0099 -0.0071 0.6797 0.0085 0.0060<br>0.0079 -0.0065 -0.0012 0.0083 0.0153        |
| ( 52.05%)                  | 0.7215* C              | 5                                       | 5 s( 0.00%)p 1.00( 99.97%)d 0.00( 0.03%)<br>0.0000 -0.0019 0.0009 -0.0002 -0.0001<br>-0.0001 0.0336 0.0009 0.0007 -0.7269<br>-0.0074 -0.0069 0.6856 0.0076 0.0066<br>0.0075 -0.0077 0.0010 -0.0080 -0.0126     |
| 9. (1.97843)<br>( 61.35%)  | BD ( 1) C<br>0.7832* C | 3- H 41                                 | 3 s( 29.33%)p 2.41( 70.59%)d 0.00( 0.08%)<br>-0.0003 0.5415 -0.0088 -0.0070 -0.0001<br>0.0001 0.7353 0.0118 -0.0017 -0.2590<br>-0.0035 0.0000 -0.3131 -0.0049 0.0000<br>-0.0130 -0.0160 0.0044 0.0161 -0.0081  |
| ( 38.65%)                  | 0.6217* H 41           | s( 99.96%)p 0.00( 0.04%)                | -0.9998 0.0022 0.0002 -0.0166 0.0062<br>0.0069                                                                                                                                                                 |
| 10. (1.99744)<br>( 25.05%) | BD ( 1) C<br>0.5005* C | 4- O 44                                 | 4 s( 0.15%)p99.99( 99.61%)d 1.54( 0.23%)<br>0.0000 -0.0380 -0.0087 -0.0006 0.0003<br>0.0002 0.7221 -0.0075 -0.0076 0.5234<br>-0.0065 -0.0091 -0.4477 -0.0051 -0.0026<br>0.0192 -0.0281 -0.0044 -0.0243 -0.0238 |
| ( 74.95%)                  | 0.8658* O 44           | s( 0.23%)p99.99( 99.39%)d 1.71( 0.39%)  | 0.0000 -0.0475 0.0020 0.0001 0.0000<br>0.0000 0.7032 0.0002 0.0009 0.6072<br>-0.0014 0.0003 0.3614 0.0018 0.0008<br>-0.0247 0.0334 0.0131 0.0334 0.0293                                                        |
| 11. (1.99744)<br>( 25.68%) | BD ( 2) C<br>0.5068* C | 4- O 44                                 | 4 s( 0.00%)p 1.00( 99.77%)d 0.00( 0.22%)<br>0.0000 -0.0059 -0.0009 -0.0006 0.0001<br>0.0000 -0.6809 0.0046 0.0083 0.4395<br>-0.0023 -0.0055 0.5837 -0.0060 -0.0074<br>-0.0259 0.0178 0.0042 -0.0091 -0.0338    |
| ( 74.32%)                  | 0.8621* O 44           | s( 0.00%)p 1.00( 99.61%)d 0.00( 0.39%)  | 0.0000 -0.0044 0.0003 0.0000 0.0000<br>0.0000 -0.6818 0.0007 -0.0008 0.4461<br>-0.0006 0.0004 0.5764 0.0002 0.0008                                                                                             |

|     |           |          |            |    |            |                |              |         |         |
|-----|-----------|----------|------------|----|------------|----------------|--------------|---------|---------|
|     |           |          |            |    | 0.0335     | -0.0253        | -0.0052      | 0.0135  | 0.0441  |
| 12. | (1.99514) | BD (3) C | 4- O 44    |    |            |                |              |         |         |
|     | (31.92%)  |          | 0.5649* C  | 4  | s(39.05%)p | 1.56(60.89%)d  | 0.00(0.06%)  |         |         |
|     |           |          |            |    | 0.0000     | 0.6101         | 0.1354       | -0.0010 | -0.0005 |
|     |           |          |            |    | -0.0005    | -0.0699        | 0.0073       | -0.0040 | 0.5817  |
|     |           |          |            |    | -0.0264    | 0.0181         | -0.5131      | 0.0288  | -0.0195 |
|     |           |          |            |    | -0.0036    | 0.0024         | -0.0208      | -0.0115 | 0.0037  |
|     | (68.08%)  |          | 0.8251* O  | 44 | s(42.47%)p | 1.34(56.76%)d  | 0.02(0.77%)  |         |         |
|     |           |          |            |    | 0.0001     | 0.6512         | -0.0237      | -0.0025 | 0.0001  |
|     |           |          |            |    | 0.0000     | 0.1628         | -0.0049      | -0.0009 | -0.4722 |
|     |           |          |            |    | 0.0214     | 0.0045         | 0.5632       | -0.0218 | -0.0046 |
|     |           |          |            |    | -0.0178    | 0.0184         | -0.0734      | -0.0320 | 0.0244  |
| 13. | (1.91955) | BD (1) C | 4-Ru 51    |    |            |                |              |         |         |
|     | (66.40%)  |          | 0.8149* C  | 4  | s(62.06%)p | 0.61(37.93%)d  | 0.00(0.01%)  |         |         |
|     |           |          |            |    | 0.0001     | 0.7871         | -0.0334      | 0.0003  | 0.0001  |
|     |           |          |            |    | 0.0003     | 0.0851         | -0.0001      | -0.0007 | -0.4299 |
|     |           |          |            |    | -0.0295    | -0.0056        | 0.4310       | 0.0241  | 0.0045  |
|     |           |          |            |    | -0.0017    | -0.0006        | -0.0085      | -0.0049 | 0.0011  |
|     | (33.60%)  |          | 0.5796* Ru | 51 | s(35.74%)p | 0.00(0.09%)d   | 1.80(64.17%) |         |         |
|     |           |          |            |    | 0.0000     | 0.0000         | -0.0001      | -0.0009 | 0.5974  |
|     |           |          |            |    | 0.0220     | -0.0084        | -0.0018      | 0.0004  | 0.0001  |
|     |           |          |            |    | -0.0009    | 0.0003         | -0.0002      | 0.0000  | -0.0001 |
|     |           |          |            |    | 0.0000     | 0.0000         | 0.0000       | 0.0000  | 0.0000  |
|     |           |          |            |    | 0.0003     | -0.0181        | -0.0111      | -0.0009 | 0.0001  |
|     |           |          |            |    | 0.0000     | 0.0000         | 0.0000       | -0.0007 | -0.0045 |
|     |           |          |            |    | 0.0058     | -0.0128        | -0.0003      | 0.0000  | 0.0000  |
|     |           |          |            |    | 0.0000     | 0.0007         | -0.0080      | -0.0142 | 0.0015  |
|     |           |          |            |    | 0.0005     | 0.0000         | 0.0000       | -0.1203 | -0.0023 |
|     |           |          |            |    | -0.0003    | 0.0001         | 0.0000       | 0.0000  | 0.1945  |
|     |           |          |            |    | 0.0122     | -0.0052        | 0.0010       | 0.0000  | 0.0000  |
|     |           |          |            |    | -0.6690    | -0.0320        | 0.0033       | -0.0023 | -0.0001 |
|     |           |          |            |    | 0.0000     | -0.2836        | -0.0128      | 0.0039  | -0.0011 |
|     |           |          |            |    | 0.0000     | 0.0000         | 0.2447       | 0.0116  | 0.0007  |
|     |           |          |            |    | 0.0009     | 0.0000         |              |         |         |
| 14. | (1.97942) | BD (1) C | 5- C 7     |    |            |                |              |         |         |
|     | (49.70%)  |          | 0.7050* C  | 5  | s(34.43%)p | 1.90(65.48%)d  | 0.00(0.09%)  |         |         |
|     |           |          |            |    | 0.0000     | 0.5867         | -0.0070      | 0.0069  | 0.0002  |
|     |           |          |            |    | -0.0002    | -0.6994        | 0.0067       | 0.0042  | 0.2606  |
|     |           |          |            |    | -0.0082    | -0.0001        | 0.3122       | -0.0096 | -0.0002 |
|     |           |          |            |    | -0.0130    | -0.0159        | 0.0065       | 0.0193  | -0.0099 |
|     | (50.30%)  |          | 0.7092* C  | 7  | s(35.53%)p | 1.81(64.41%)d  | 0.00(0.07%)  |         |         |
|     |           |          |            |    | -0.0002    | 0.5961         | 0.0000       | -0.0024 | 0.0001  |
|     |           |          |            |    | 0.0000     | 0.7089         | -0.0063      | 0.0023  | -0.2388 |
|     |           |          |            |    | 0.0119     | 0.0000         | -0.2901      | 0.0140  | -0.0001 |
|     |           |          |            |    | -0.0127    | -0.0152        | 0.0044       | 0.0140  | -0.0068 |
| 15. | (1.97434) | BD (1) C | 5- H 28    |    |            |                |              |         |         |
|     | (61.15%)  |          | 0.7820* C  | 5  | s(29.59%)p | 2.38(70.34%)d  | 0.00(0.07%)  |         |         |
|     |           |          |            |    | -0.0004    | 0.5439         | -0.0033      | -0.0092 | -0.0002 |
|     |           |          |            |    | 0.0002     | 0.7121         | 0.0040       | -0.0036 | 0.3203  |
|     |           |          |            |    | 0.0025     | -0.0058        | 0.3062       | 0.0025  | -0.0061 |
|     |           |          |            |    | 0.0149     | 0.0139         | 0.0071       | 0.0124  | -0.0075 |
|     | (38.85%)  |          | 0.6233* H  | 28 | s(99.94%)p | 0.00(0.06%)    |              |         |         |
|     |           |          |            |    | 0.9997     | 0.0021         | 0.0002       | -0.0215 | -0.0084 |
|     |           |          |            |    | -0.0077    |                |              |         |         |
| 16. | (1.99654) | BD (1) C | 6- O 46    |    |            |                |              |         |         |
|     | (25.33%)  |          | 0.5033* C  | 6  | s(0.90%)p  | 99.99(98.87%)d | 0.25(0.23%)  |         |         |
|     |           |          |            |    | 0.0000     | 0.0933         | 0.0183       | 0.0003  | -0.0001 |
|     |           |          |            |    | 0.0000     | 0.5398         | -0.0146      | -0.0039 | 0.0006  |
|     |           |          |            |    | -0.0043    | -0.0024        | 0.8347       | -0.0090 | -0.0135 |
|     |           |          |            |    | -0.0128    | 0.0221         | -0.0230      | 0.0183  | -0.0277 |
|     | (74.67%)  |          | 0.8641* O  | 46 | s(0.87%)p  | 99.99(98.72%)d | 0.47(0.41%)  |         |         |
|     |           |          |            |    | 0.0000     | 0.0931         | -0.0032      | -0.0004 | 0.0000  |
|     |           |          |            |    | 0.0000     | 0.3742         | 0.0009       | 0.0013  | 0.1119  |
|     |           |          |            |    | -0.0045    | -0.0003        | 0.9136       | -0.0024 | 0.0005  |
|     |           |          |            |    | 0.0030     | -0.0386        | 0.0330       | -0.0213 | 0.0321  |
| 17. | (1.99612) | BD (2) C | 6- O 46    |    |            |                |              |         |         |
|     | (25.12%)  |          | 0.5012* C  | 6  | s(0.13%)p  | 99.99(99.64%)d | 1.85(0.23%)  |         |         |
|     |           |          |            |    | 0.0000     | 0.0344         | 0.0087       | 0.0010  | -0.0003 |
|     |           |          |            |    | 0.0000     | 0.4567         | -0.0071      | -0.0061 | 0.8352  |
|     |           |          |            |    | -0.0045    | -0.0126        | -0.3001      | -0.0040 | 0.0040  |
|     |           |          |            |    | 0.0193     | -0.0183        | -0.0069      | 0.0382  | 0.0107  |
|     | (74.88%)  |          | 0.8653* O  | 46 | s(0.10%)p  | 99.99(99.50%)d | 4.07(0.40%)  |         |         |
|     |           |          |            |    | 0.0000     | 0.0312         | -0.0015      | -0.0001 | 0.0000  |
|     |           |          |            |    | 0.0000     | 0.4079         | 0.0011       | 0.0007  | 0.8673  |
|     |           |          |            |    | -0.0013    | 0.0004         | -0.2766      | -0.0035 | -0.0002 |
|     |           |          |            |    | -0.0306    | 0.0223         | 0.0122       | -0.0474 | -0.0121 |
| 18. | (1.99465) | BD (3) C | 6- O 46    |    |            |                |              |         |         |
|     | (31.30%)  |          | 0.5594* C  | 6  | s(37.49%)p | 1.67(62.45%)d  | 0.00(0.06%)  |         |         |
|     |           |          |            |    | -0.0001    | 0.5970         | 0.1361       | -0.0023 | -0.0007 |
|     |           |          |            |    | -0.0006    | 0.5109         | -0.0246      | 0.0240  | -0.4489 |
|     |           |          |            |    | 0.0169     | -0.0156        | -0.3998      | 0.0192  | -0.0087 |
|     |           |          |            |    | -0.0162    | -0.0139        | 0.0120       | 0.0016  | -0.0039 |
|     | (68.70%)  |          | 0.8289* O  | 46 | s(42.62%)p | 1.33(56.61%)d  | 0.02(0.76%)  |         |         |
|     |           |          |            |    | 0.0001     | 0.6524         | -0.0251      | -0.0028 | 0.0001  |
|     |           |          |            |    | 0.0000     | -0.6540        | 0.0223       | 0.0044  | 0.3347  |
|     |           |          |            |    | -0.0157    | -0.0033        | 0.1596       | -0.0097 | -0.0023 |
|     |           |          |            |    | -0.0604    | -0.0390        | 0.0242       | 0.0308  | -0.0303 |
| 19. | (1.92504) | BD (1) C | 6-Ru 52    |    |            |                |              |         |         |
|     | (68.20%)  |          | 0.8258* C  | 6  | s(62.92%)p | 0.59(37.08%)d  | 0.00(0.01%)  |         |         |
|     |           |          |            |    | 0.0001     | 0.7923         | -0.0385      | 0.0017  | 0.0002  |
|     |           |          |            |    | 0.0003     | -0.4763        | -0.0313      | -0.0064 | 0.3070  |
|     |           |          |            |    | 0.0175     | 0.0042         | 0.2197       | 0.0105  | 0.0017  |
|     |           |          |            |    | -0.0055    | -0.0042        | 0.0028       | 0.0038  | -0.0027 |
|     | (31.80%)  |          | 0.5639* Ru | 52 | s(36.90%)p | 0.00(0.06%)d   | 1.71(63.03%) |         |         |
|     |           |          |            |    | 0.0000     | 0.0000         | 0.0000       | -0.0009 | 0.6070  |
|     |           |          |            |    | 0.0232     | -0.0047        | -0.0026      | -0.0001 | 0.0009  |
|     |           |          |            |    | 0.0000     | 0.0002         | 0.0000       | 0.0000  | 0.0000  |
|     |           |          |            |    | 0.0000     | -0.0001        | 0.0001       | 0.0000  | 0.0000  |
|     |           |          |            |    | -0.0005    | -0.0037        | 0.0129       | -0.0061 | -0.0005 |
|     |           |          |            |    | 0.0000     | 0.0000         | 0.0000       | 0.0006  | 0.0032  |
|     |           |          |            |    | 0.0002     | 0.0139         | 0.0000       | 0.0000  | 0.0000  |
|     |           |          |            |    | 0.0000     | 0.0003         | -0.0096      | -0.0115 | 0.0016  |
|     |           |          |            |    | 0.0003     | 0.0000         | 0.0000       | -0.4639 | -0.0164 |
|     |           |          |            |    | 0.0045     | -0.0016        | -0.0001      | 0.0000  | -0.4796 |
|     |           |          |            |    | -0.0153    | 0.0019         | -0.0012      | -0.0001 | 0.0000  |
|     |           |          |            |    | 0.2184     | 0.0249         | -0.0019      | 0.0001  | 0.0001  |
|     |           |          |            |    | 0.0000     | 0.3402         | 0.0229       | 0.0009  | 0.0007  |
|     |           |          |            |    | 0.0001     | 0.0000         | -0.1413      | -0.0068 | -0.0007 |
|     |           |          |            |    | -0.0003    | -0.0001        |              |         |         |
| 20. | (1.97250) | BD (1) C | 7- C 9     |    |            |                |              |         |         |
|     | (50.89%)  |          | 0.7134* C  | 7  | s(34.57%)p | 1.89(65.38%)d  | 0.00(0.05%)  |         |         |
|     |           |          |            |    | -0.0003    | 0.5878         | -0.0133      | 0.0015  | -0.0004 |
|     |           |          |            |    | 0.0000     | -0.0681        | 0.0074       | 0.0033  | 0.5583  |
|     |           |          |            |    | -0.0131    | -0.0011        | 0.5805       | -0.0136 | -0.0015 |
|     |           |          |            |    | -0.0038    | -0.0039        | 0.0179       | -0.0093 | 0.0055  |
|     | (49.11%)  |          | 0.7008* C  | 9  | s(30.47%)p | 2.28(69.46%)d  | 0.00(0.07%)  |         |         |



|     |           |          |               |              |                   |                  |         |         |  |
|-----|-----------|----------|---------------|--------------|-------------------|------------------|---------|---------|--|
|     |           |          |               | -0.0002      | 0.5519            | -0.0084          | 0.0013  | -0.0002 |  |
|     |           |          |               | 0.0003       | 0.1337            | 0.0023           | 0.0023  | -0.5819 |  |
|     |           |          |               | 0.0104       | -0.0004           | -0.5813          | 0.0108  | -0.0005 |  |
|     |           |          |               | -0.0044      | -0.0043           | 0.0223           | -0.0106 | 0.0066  |  |
| 21. | (1.98200) | BD (1) C | 7- N 49       |              |                   |                  |         |         |  |
|     | (40.71%)  |          | 0.6380* C     | 7 s( 29.91%) | p 2.34 ( 70.02%)  | d 0.00 ( 0.07%)  |         |         |  |
|     |           |          |               | -0.0001      | 0.5465            | 0.0198           | -0.0007 | 0.0005  |  |
|     |           |          |               | 0.0002       | -0.7001           | -0.0120          | -0.0016 | -0.3352 |  |
|     |           |          |               | -0.0007      | -0.0002           | -0.3123          | 0.0008  | -0.0003 |  |
|     |           |          |               | 0.0151       | 0.0141            | 0.0079           | 0.0128  | -0.0079 |  |
|     | (59.29%)  |          | 0.7700* N 49  | s( 33.99%)   | p 1.94 ( 65.84%)  | d 0.01 ( 0.17%)  |         |         |  |
|     |           |          |               | -0.0001      | 0.5828            | 0.0142           | -0.0003 | 0.0007  |  |
|     |           |          |               | -0.0002      | 0.6872            | 0.0088           | 0.0005  | 0.3190  |  |
|     |           |          |               | 0.0105       | 0.0018            | 0.2900           | 0.0120  | 0.0017  |  |
|     |           |          |               | 0.0192       | 0.0156            | 0.0102           | 0.0272  | -0.0166 |  |
| 22. | (1.72309) | BD (2) C | 7- N 49       |              |                   |                  |         |         |  |
|     | (34.09%)  |          | 0.5838* C     | 7 s( 0.00%)  | p 1.00 ( 99.92%)  | d 0.00 ( 0.08%)  |         |         |  |
|     |           |          |               | 0.0000       | -0.0035           | -0.0011          | -0.0003 | 0.0000  |  |
|     |           |          |               | 0.0000       | -0.0382           | -0.0025          | 0.0000  | 0.7189  |  |
|     |           |          |               | 0.0285       | -0.0021           | -0.6923          | -0.0283 | 0.0016  |  |
|     |           |          |               | -0.0137      | 0.0138            | -0.0009          | 0.0117  | 0.0174  |  |
|     | (65.91%)  |          | 0.8119* N 49  | s( 0.00%)    | p 1.00 ( 99.91%)  | d 0.00 ( 0.09%)  |         |         |  |
|     |           |          |               | 0.0000       | -0.0011           | 0.0004           | -0.0006 | 0.0001  |  |
|     |           |          |               | 0.0000       | -0.0477           | -0.0045          | 0.0005  | 0.7267  |  |
|     |           |          |               | 0.0239       | -0.0012           | -0.6838          | -0.0238 | 0.0012  |  |
|     |           |          |               | 0.0212       | -0.0189           | -0.0026          | 0.0017  | 0.0086  |  |
| 23. | (1.99736) | BD (1) C | 8- O 47       |              |                   |                  |         |         |  |
|     | (25.09%)  |          | 0.5009* C     | 8 s( 0.15%)  | p 99.99 ( 99.61%) | d 1.53 ( 0.23%)  |         |         |  |
|     |           |          |               | 0.0000       | -0.0382           | -0.0081          | -0.0009 | 0.0003  |  |
|     |           |          |               | 0.0002       | 0.3206            | -0.0025          | -0.0018 | -0.6404 |  |
|     |           |          |               | 0.0067       | 0.0103            | 0.6950           | -0.0086 | -0.0067 |  |
|     |           |          |               | 0.0081       | -0.0254           | -0.0074          | -0.0299 | -0.0261 |  |
|     | (74.91%)  |          | 0.8655* O 47  | s( 0.21%)    | p 99.99 ( 99.40%) | d 1.87 ( 0.39%)  |         |         |  |
|     |           |          |               | 0.0000       | -0.0456           | 0.0019           | 0.0000  | -0.0001 |  |
|     |           |          |               | 0.0000       | 0.2548            | 0.0015           | 0.0006  | -0.7199 |  |
|     |           |          |               | 0.0014       | -0.0004           | 0.6409           | 0.0010  | 0.0010  |  |
|     |           |          |               | -0.0158      | 0.0286            | 0.0060           | 0.0404  | 0.0340  |  |
| 24. | (1.99750) | BD (2) C | 8- O 47       |              |                   |                  |         |         |  |
|     | (25.68%)  |          | 0.5068* C     | 8 s( 0.01%)  | p 1.00 ( 99.77%)  | d 0.00 ( 0.22%)  |         |         |  |
|     |           |          |               | 0.0000       | 0.0072            | 0.0036           | -0.0007 | 0.0001  |  |
|     |           |          |               | 0.0000       | 0.7647            | -0.0057          | -0.0099 | -0.2569 |  |
|     |           |          |               | 0.0003       | 0.0023            | -0.5889          | 0.0054  | 0.0068  |  |
|     |           |          |               | -0.0178      | -0.0013           | 0.0245           | -0.0282 | 0.0222  |  |
|     | (74.32%)  |          | 0.8621* O 47  | s( 0.01%)    | p 99.99 ( 99.60%) | d 29.53 ( 0.39%) |         |         |  |
|     |           |          |               | 0.0000       | 0.0115            | -0.0005          | 0.0000  | 0.0000  |  |
|     |           |          |               | 0.0000       | 0.7803            | -0.0006          | 0.0009  | -0.2368 |  |
|     |           |          |               | -0.0002      | -0.0003           | -0.5753          | 0.0003  | -0.0007 |  |
|     |           |          |               | 0.0257       | 0.0019            | -0.0310          | 0.0378  | -0.0289 |  |
| 25. | (1.99516) | BD (3) C | 8- O 47       |              |                   |                  |         |         |  |
|     | (31.92%)  |          | 0.5650* C     | 8 s( 39.04%) | p 1.56 ( 60.90%)  | d 0.00 ( 0.06%)  |         |         |  |
|     |           |          |               | -0.0001      | 0.6097            | 0.1362           | -0.0011 | -0.0005 |  |
|     |           |          |               | -0.0005      | -0.4299           | 0.0223           | -0.0155 | -0.5770 |  |
|     |           |          |               | 0.0264       | -0.0180           | -0.2983          | 0.0199  | -0.0124 |  |
|     |           |          |               | 0.0170       | 0.0090            | 0.0127           | -0.0051 | -0.0067 |  |
|     | (68.08%)  |          | 0.8251* O 47  | s( 42.48%)   | p 1.34 ( 56.75%)  | d 0.02 ( 0.77%)  |         |         |  |
|     |           |          |               | 0.0001       | 0.6513            | -0.0236          | -0.0025 | 0.0001  |  |
|     |           |          |               | 0.0000       | 0.4295            | -0.0173          | -0.0036 | 0.4688  |  |
|     |           |          |               | -0.0212      | -0.0045           | 0.4028           | -0.0143 | -0.0029 |  |
|     |           |          |               | 0.0573       | 0.0415            | 0.0491           | -0.0093 | -0.0134 |  |
| 26. | (1.91979) | BD (1) C | 8-Ru 52       |              |                   |                  |         |         |  |
|     | (66.59%)  |          | 0.8160* C     | 8 s( 62.09%) | p 0.61 ( 37.90%)  | d 0.00 ( 0.01%)  |         |         |  |
|     |           |          |               | 0.0001       | 0.7873            | -0.0332          | 0.0003  | 0.0001  |  |
|     |           |          |               | 0.0003       | 0.3475            | 0.0211           | 0.0043  | 0.4258  |  |
|     |           |          |               | 0.0295       | 0.0057            | 0.2747           | 0.0114  | 0.0016  |  |
|     |           |          |               | 0.0065       | 0.0025            | 0.0054           | -0.0018 | -0.0041 |  |
|     | (33.41%)  |          | 0.5780* Ru 52 | s( 35.82%)   | p 0.00 ( 0.09%)   | d 1.79 ( 64.09%) |         |         |  |
|     |           |          |               | 0.0000       | 0.0000            | -0.0001          | -0.0009 | 0.5980  |  |
|     |           |          |               | 0.0230       | -0.0082           | -0.0024          | 0.0004  | 0.0002  |  |
|     |           |          |               | -0.0008      | 0.0004            | -0.0001          | -0.0001 | 0.0000  |  |
|     |           |          |               | 0.0000       | -0.0001           | 0.0001           | 0.0000  | 0.0000  |  |
|     |           |          |               | 0.0005       | 0.0003            | -0.0084          | 0.0016  | 0.0004  |  |
|     |           |          |               | 0.0000       | 0.0000            | 0.0000           | 0.0007  | 0.0042  |  |
|     |           |          |               | -0.0053      | 0.0130            | 0.0003           | 0.0000  | 0.0000  |  |
|     |           |          |               | 0.0000       | 0.0006            | -0.0186          | -0.0161 | 0.0000  |  |
|     |           |          |               | 0.0003       | 0.0000            | 0.0000           | 0.5358  | 0.0240  |  |
|     |           |          |               | -0.0034      | 0.0021            | 0.0001           | 0.0000  | 0.4049  |  |
|     |           |          |               | 0.0236       | -0.0041           | 0.0016           | 0.0001  | 0.0000  |  |
|     |           |          |               | 0.4144       | 0.0184            | -0.0014          | 0.0009  | 0.0001  |  |
|     |           |          |               | 0.0000       | -0.0764           | -0.0042          | 0.0048  | -0.0005 |  |
|     |           |          |               | 0.0000       | 0.0000            | -0.1033          | -0.0077 | -0.0009 |  |
|     |           |          |               | 0.0000       | 0.0000            |                  |         |         |  |
| 27. | (1.97155) | BD (1) C | 9- C 11       |              |                   |                  |         |         |  |
|     | (53.54%)  |          | 0.7317* C     | 9 s( 34.84%) | p 1.87 ( 65.09%)  | d 0.00 ( 0.06%)  |         |         |  |
|     |           |          |               | -0.0001      | 0.5903            | 0.0028           | -0.0024 | 0.0000  |  |
|     |           |          |               | -0.0002      | -0.7593           | 0.0003           | 0.0071  | 0.1990  |  |
|     |           |          |               | -0.0038      | 0.0006            | 0.1862           | -0.0046 | -0.0001 |  |
|     |           |          |               | -0.0084      | -0.0079           | 0.0048           | 0.0187  | -0.0109 |  |
|     | (46.46%)  |          | 0.6816* C 11  | s( 35.14%)   | p 1.84 ( 64.76%)  | d 0.00 ( 0.10%)  |         |         |  |
|     |           |          |               | -0.0001      | 0.5927            | 0.0126           | 0.0013  | 0.0004  |  |
|     |           |          |               | 0.0004       | 0.7403            | 0.0169           | 0.0049  | -0.2290 |  |
|     |           |          |               | -0.0071      | -0.0010           | -0.2159          | -0.0077 | -0.0021 |  |
|     |           |          |               | -0.0096      | -0.0091           | 0.0057           | 0.0244  | -0.0150 |  |
| 28. | (1.97418) | BD (1) C | 9- C 13       |              |                   |                  |         |         |  |
|     | (50.89%)  |          | 0.7134* C     | 9 s( 34.63%) | p 1.89 ( 65.30%)  | d 0.00 ( 0.07%)  |         |         |  |
|     |           |          |               | -0.0003      | 0.5885            | 0.0065           | -0.0001 | 0.0003  |  |
|     |           |          |               | 0.0001       | 0.6363            | -0.0003          | 0.0025  | 0.3502  |  |
|     |           |          |               | -0.0087      | 0.0011            | 0.3540           | -0.0069 | 0.0013  |  |
|     |           |          |               | 0.0145       | 0.0149            | 0.0088           | 0.0107  | -0.0058 |  |
|     | (49.11%)  |          | 0.7008* C 13  | s( 35.26%)   | p 1.83 ( 64.66%)  | d 0.00 ( 0.08%)  |         |         |  |
|     |           |          |               | 0.0000       | 0.5937            | -0.0062          | 0.0078  | 0.0002  |  |
|     |           |          |               | -0.0002      | -0.6052           | 0.0050           | 0.0028  | -0.3608 |  |
|     |           |          |               | 0.0109       | 0.0014            | -0.3872          | 0.0102  | 0.0011  |  |
|     |           |          |               | 0.0158       | 0.0168            | 0.0114           | 0.0108  | -0.0058 |  |
| 29. | (1.62982) | BD (2) C | 9- C 13       |              |                   |                  |         |         |  |
|     | (52.43%)  |          | 0.7241* C     | 9 s( 0.00%)  | p 1.00 ( 99.99%)  | d 0.00 ( 0.01%)  |         |         |  |
|     |           |          |               | 0.0000       | -0.0035           | -0.0009          | 0.0000  | 0.0000  |  |
|     |           |          |               | 0.0000       | 0.0086            | -0.0026          | 0.0000  | 0.7059  |  |
|     |           |          |               | 0.0074       | 0.0025            | -0.7081          | -0.0079 | -0.0024 |  |
|     |           |          |               | 0.0055       | -0.0052           | -0.0004          | -0.0029 | -0.0054 |  |
|     | (47.57%)  |          | 0.6897* C 13  | s( 0.00%)    | p 1.00 ( 99.97%)  | d 0.00 ( 0.02%)  |         |         |  |
|     |           |          |               | 0.0000       | -0.0022           | -0.0013          | 0.0002  | 0.0000  |  |
|     |           |          |               | 0.0001       | 0.0281            | 0.0006           | 0.0001  | 0.7073  |  |
|     |           |          |               | 0.0029       | 0.0057            | -0.7061          | -0.0033 | -0.0058 |  |
|     |           |          |               | -0.0108      | 0.0106            | -0.0007          | 0.0014  | 0.0039  |  |
| 30. | (1.99651) | BD (1) C | 10- O 48      |              |                   |                  |         |         |  |
|     | (25.26%)  |          | 0.5026* C     | 10 s( 0.38%) | p 99.99 ( 99.39%) | d 0.60 ( 0.23%)  |         |         |  |

|               |                    |                                         |  |         |         |         |         |         |
|---------------|--------------------|-----------------------------------------|--|---------|---------|---------|---------|---------|
|               |                    |                                         |  | 0.0000  | 0.0606  | 0.0123  | 0.0005  | -0.0001 |
|               |                    |                                         |  | 0.0000  | 0.4815  | 0.0025  | -0.0084 | -0.1110 |
|               |                    |                                         |  | -0.0062 | 0.0033  | 0.8655  | 0.0198  | -0.0113 |
|               |                    |                                         |  | 0.0163  | -0.0160 | 0.0188  | -0.0140 | 0.0351  |
| ( 74.74%)     | 0.8645* O 48       | s( 0.33%)p99.99( 99.26%)d 1.21( 0.40%)  |  | 0.0000  | 0.0578  | -0.0021 | -0.0002 | 0.0000  |
|               |                    |                                         |  | 0.0000  | 0.5713  | -0.0022 | 0.0000  | -0.1759 |
|               |                    |                                         |  | 0.0041  | 0.0001  | 0.7970  | -0.0018 | 0.0012  |
|               |                    |                                         |  | -0.0269 | 0.0141  | -0.0170 | 0.0199  | -0.0493 |
| 31. (1.99560) | BD ( 2) C 10- O 48 |                                         |  | 0.0000  | -0.0816 | -0.0189 | -0.0010 | 0.0004  |
| ( 25.09%)     | 0.5009* C 10       | s( 0.70%)p99.99( 99.07%)d 0.33( 0.23%)  |  | 0.0001  | 0.5579  | 0.0002  | -0.0045 | 0.7990  |
|               |                    |                                         |  | 0.0041  | -0.0139 | -0.2018 | -0.0072 | 0.0010  |
|               |                    |                                         |  | -0.0142 | 0.0175  | 0.0159  | -0.0387 | -0.0067 |
| ( 74.91%)     | 0.8655* O 48       | s( 0.72%)p99.99( 98.88%)d 0.56( 0.40%)  |  | 0.0000  | -0.0846 | 0.0035  | 0.0004  | 0.0000  |
|               |                    |                                         |  | 0.0000  | 0.4271  | 0.0052  | 0.0008  | 0.8921  |
|               |                    |                                         |  | -0.0023 | 0.0002  | -0.1030 | -0.0006 | -0.0007 |
|               |                    |                                         |  | 0.0285  | -0.0165 | -0.0286 | 0.0449  | 0.0097  |
| 32. (1.99463) | BD ( 3) C 10- O 48 |                                         |  | -0.0001 | 0.5953  | 0.1388  | -0.0020 | -0.0008 |
| ( 31.24%)     | 0.5589* C 10       | s( 37.37%)p 1.67( 62.57%)d 0.00( 0.06%) |  | -0.0007 | -0.5205 | -0.0290 | -0.0203 | 0.5058  |
|               |                    |                                         |  | 0.0175  | 0.0135  | 0.3109  | 0.0139  | 0.0172  |
|               |                    |                                         |  | -0.0182 | -0.0111 | 0.0115  | 0.0002  | -0.0062 |
| ( 68.76%)     | 0.8292* O 48       | s( 42.68%)p 1.33( 56.56%)d 0.02( 0.76%) |  | 0.0001  | 0.6528  | -0.0252 | -0.0027 | 0.0001  |
|               |                    |                                         |  | 0.0000  | 0.5255  | -0.0186 | -0.0041 | -0.2442 |
|               |                    |                                         |  | 0.0150  | 0.0032  | -0.4785 | 0.0155  | 0.0030  |
|               |                    |                                         |  | -0.0470 | -0.0592 | 0.0376  | 0.0222  | -0.0018 |
| 33. (1.92613) | BD ( 1) C 10-Ru 51 |                                         |  | 0.0001  | 0.7931  | -0.0385 | 0.0016  | 0.0002  |
| ( 68.44%)     | 0.8273* C 10       | s( 63.04%)p 0.59( 36.95%)d 0.00( 0.01%) |  | 0.0003  | 0.4185  | -0.0230 | 0.0046  | -0.2943 |
|               |                    |                                         |  | 0.0168  | -0.0038 | -0.3260 | 0.0237  | -0.0052 |
|               |                    |                                         |  | -0.0048 | -0.0059 | 0.0037  | 0.0024  | 0.0000  |
| ( 31.56%)     | 0.5618* Ru 51      | s( 37.53%)p 0.00( 0.07%)d 1.66( 62.39%) |  | 0.0000  | 0.0000  | 0.0000  | -0.0009 | 0.6122  |
|               |                    |                                         |  | 0.0224  | -0.0047 | -0.0016 | -0.0001 | 0.0008  |
|               |                    |                                         |  | -0.0001 | 0.0002  | -0.0001 | 0.0000  | 0.0000  |
|               |                    |                                         |  | 0.0000  | 0.0000  | 0.0000  | 0.0000  | 0.0000  |
|               |                    |                                         |  | 0.0004  | -0.0082 | -0.0173 | 0.0041  | 0.0006  |
|               |                    |                                         |  | 0.0000  | 0.0000  | 0.0000  | -0.0006 | -0.0044 |
|               |                    |                                         |  | -0.0012 | -0.0138 | 0.0000  | 0.0000  | 0.0000  |
|               |                    |                                         |  | 0.0000  | -0.0003 | -0.0080 | 0.0064  | -0.0045 |
|               |                    |                                         |  | -0.0003 | 0.0000  | 0.0000  | -0.3840 | -0.0243 |
|               |                    |                                         |  | 0.0036  | -0.0008 | -0.0001 | 0.0000  | -0.5124 |
|               |                    |                                         |  | -0.0197 | -0.0002 | -0.0013 | -0.0001 | 0.0000  |
|               |                    |                                         |  | 0.2859  | 0.0033  | -0.0033 | 0.0012  | 0.0000  |
|               |                    |                                         |  | 0.0000  | 0.3499  | 0.0208  | -0.0007 | 0.0006  |
|               |                    |                                         |  | 0.0001  | 0.0000  | -0.0908 | 0.0024  | 0.0023  |
|               |                    |                                         |  | -0.0002 | 0.0000  |         |         |         |
| 34. (1.97955) | BD ( 1) C 11- C 15 |                                         |  | -0.0001 | 0.6092  | 0.0352  | -0.0021 | 0.0003  |
| ( 48.03%)     | 0.6930* C 11       | s( 37.24%)p 1.68( 62.67%)d 0.00( 0.09%) |  | 0.0000  | -0.1577 | -0.0174 | -0.0047 | 0.5609  |
|               |                    |                                         |  | 0.0153  | 0.0048  | 0.5352  | 0.0130  | 0.0038  |
|               |                    |                                         |  | -0.0009 | -0.0009 | 0.0272  | -0.0123 | 0.0060  |
| ( 51.97%)     | 0.7209* C 15       | s( 36.81%)p 1.71( 63.10%)d 0.00( 0.09%) |  | 0.0001  | 0.6066  | 0.0082  | 0.0016  | 0.0000  |
|               |                    |                                         |  | -0.0004 | 0.0809  | 0.0148  | -0.0024 | -0.5707 |
|               |                    |                                         |  | 0.0093  | 0.0037  | -0.5461 | 0.0101  | 0.0034  |
|               |                    |                                         |  | -0.0063 | -0.0057 | 0.0264  | -0.0116 | 0.0050  |
| 35. (1.60134) | BD ( 2) C 11- C 15 |                                         |  | 0.0000  | 0.0064  | -0.0030 | 0.0005  | 0.0000  |
| ( 45.95%)     | 0.6778* C 11       | s( 0.01%)p 1.00( 99.94%)d 0.00( 0.05%)  |  | 0.0000  | -0.0107 | 0.0050  | -0.0006 | -0.6946 |
|               |                    |                                         |  | -0.0246 | 0.0051  | 0.7176  | 0.0336  | -0.0058 |
|               |                    |                                         |  | -0.0083 | 0.0090  | 0.0010  | 0.0096  | 0.0169  |
| ( 54.05%)     | 0.7352* C 15       | s( 0.00%)p 1.00( 99.97%)d 0.00( 0.03%)  |  | -0.0001 | -0.0042 | 0.0001  | 0.0003  | 0.0000  |
|               |                    |                                         |  | 0.0000  | -0.0142 | 0.0005  | 0.0003  | -0.6945 |
|               |                    |                                         |  | 0.0012  | -0.0040 | 0.7191  | -0.0026 | 0.0048  |
|               |                    |                                         |  | -0.0090 | 0.0091  | -0.0006 | -0.0059 | -0.0093 |
| 36. (1.85393) | BD ( 1) C 11-Ru 51 |                                         |  | 0.0001  | -0.5249 | 0.0325  | -0.0025 | 0.0006  |
| ( 59.60%)     | 0.7720* C 11       | s( 27.65%)p 2.62( 72.34%)d 0.00( 0.01%) |  | 0.0002  | 0.6509  | -0.0371 | 0.0030  | 0.3835  |
|               |                    |                                         |  | -0.0394 | 0.0012  | 0.3860  | -0.0292 | -0.0005 |
|               |                    |                                         |  | -0.0053 | -0.0031 | -0.0036 | 0.0005  | 0.0015  |
| ( 40.40%)     | 0.6356* Ru 51      | s( 26.47%)p 0.00( 0.06%)d 2.78( 73.47%) |  | 0.0000  | 0.0000  | 0.0001  | -0.0007 | -0.5143 |
|               |                    |                                         |  | -0.0116 | 0.0086  | -0.0010 | -0.0008 | 0.0013  |
|               |                    |                                         |  | -0.0016 | 0.0004  | -0.0001 | 0.0000  | -0.0001 |
|               |                    |                                         |  | 0.0000  | 0.0000  | 0.0000  | 0.0000  | 0.0000  |
|               |                    |                                         |  | 0.0007  | 0.0137  | -0.0053 | 0.0029  | -0.0003 |
|               |                    |                                         |  | 0.0000  | 0.0000  | 0.0000  | 0.0008  | 0.0068  |
|               |                    |                                         |  | -0.0099 | 0.0097  | -0.0002 | 0.0000  | 0.0000  |
|               |                    |                                         |  | 0.0000  | 0.0010  | 0.0027  | -0.0089 | 0.0018  |
|               |                    |                                         |  | -0.0001 | 0.0000  | -0.0001 | -0.6055 | 0.0009  |
|               |                    |                                         |  | 0.0003  | -0.0013 | 0.0000  | 0.0000  | -0.3728 |
|               |                    |                                         |  | -0.0033 | -0.0001 | -0.0010 | 0.0000  | 0.0000  |
|               |                    |                                         |  | -0.4386 | 0.0132  | -0.0017 | -0.0007 | 0.0000  |
|               |                    |                                         |  | 0.0000  | 0.0922  | 0.0051  | -0.0062 | 0.0000  |
|               |                    |                                         |  | 0.0000  | 0.0000  | 0.1673  | -0.0060 | -0.0001 |
|               |                    |                                         |  | 0.0002  | 0.0000  |         |         |         |
| 37. (1.98338) | BD ( 1) C 12- C 14 |                                         |  | -0.0001 | 0.6149  | 0.0023  | 0.0039  | -0.0001 |
| ( 50.00%)     | 0.7071* C 12       | s( 37.81%)p 1.64( 62.10%)d 0.00( 0.09%) |  | 0.0000  | -0.6016 | 0.0075  | -0.0056 | 0.2665  |
|               |                    |                                         |  | -0.0153 | 0.0023  | 0.4330  | 0.0169  | -0.0014 |
|               |                    |                                         |  | -0.0120 | -0.0226 | 0.0093  | 0.0119  | 0.0010  |
| ( 50.00%)     | 0.7071* C 14       | s( 34.64%)p 1.88( 65.26%)d 0.00( 0.09%) |  | 0.0000  | 0.5886  | -0.0006 | 0.0050  | -0.0002 |
|               |                    |                                         |  | 0.0002  | 0.6003  | -0.0088 | -0.0051 | -0.2623 |
|               |                    |                                         |  | -0.0041 | 0.0024  | -0.4721 | 0.0234  | -0.0005 |
|               |                    |                                         |  | -0.0159 | -0.0214 | 0.0091  | 0.0123  | -0.0023 |
| 38. (1.64997) | BD ( 2) C 12- C 14 |                                         |  | 0.0000  | -0.0008 | 0.0009  | -0.0012 | 0.0001  |
| ( 46.66%)     | 0.6831* C 12       | s( 0.00%)p 1.00( 99.96%)d 0.00( 0.04%)  |  | -0.0001 | 0.5750  | 0.0124  | 0.0047  | 0.7422  |
|               |                    |                                         |  | 0.0112  | 0.0032  | 0.3433  | 0.0044  | 0.0020  |
|               |                    |                                         |  | -0.0079 | 0.0057  | 0.0118  | -0.0072 | 0.0096  |
| ( 53.34%)     | 0.7304* C 14       | s( 0.00%)p 1.00( 99.97%)d 0.00( 0.03%)  |  | 0.0000  | -0.0006 | 0.0018  | -0.0008 | 0.0000  |

|     |           |                   |                                      |         |         |         |         |         |
|-----|-----------|-------------------|--------------------------------------|---------|---------|---------|---------|---------|
|     |           |                   |                                      | -0.0001 | 0.5853  | 0.0107  | 0.0052  | 0.7388  |
|     |           |                   |                                      | 0.0117  | 0.0065  | 0.3330  | 0.0057  | 0.0037  |
|     |           |                   |                                      | 0.0045  | 0.0040  | -0.0049 | 0.0169  | -0.0005 |
| 39. | (1.97414) | BD (1) C 12- H 29 |                                      |         |         |         |         |         |
|     | (60.71%)  | 0.7792* C 12      | s(29.83%)p 2.35(70.11%)d 0.00(0.06%) | 0.0004  | -0.5458 | 0.0172  | 0.0070  | -0.0002 |
|     |           |                   |                                      | 0.0002  | -0.1153 | -0.0012 | 0.0073  | -0.2735 |
|     |           |                   |                                      | 0.0001  | 0.0040  | 0.7828  | 0.0131  | -0.0084 |
|     |           |                   |                                      | -0.0024 | 0.0065  | 0.0123  | 0.0020  | -0.0199 |
|     | (39.29%)  | 0.6268* H 29      | s(99.91%)p 0.00(0.09%)               | -0.9995 | -0.0027 | -0.0025 | 0.0052  | 0.0126  |
|     |           |                   |                                      | -0.0270 |         |         |         |         |
| 40. | (1.98629) | BD (1) C 12- N 50 |                                      |         |         |         |         |         |
|     | (40.16%)  | 0.6337* C 12      | s(32.38%)p 2.09(67.54%)d 0.00(0.09%) | 0.0000  | 0.5685  | 0.0233  | 0.0037  | -0.0002 |
|     |           |                   |                                      | 0.0003  | 0.5408  | -0.0235 | 0.0047  | -0.5493 |
|     |           |                   |                                      | 0.0163  | -0.0055 | 0.2833  | 0.0054  | -0.0002 |
|     |           |                   |                                      | -0.0223 | 0.0117  | -0.0131 | -0.0011 | -0.0077 |
|     | (59.84%)  | 0.7735* N 50      | s(35.27%)p 1.83(64.56%)d 0.00(0.18%) | 0.0000  | 0.5932  | 0.0293  | -0.0008 | 0.0004  |
|     |           |                   |                                      | -0.0001 | -0.5177 | -0.0057 | -0.0002 | 0.5439  |
|     |           |                   |                                      | 0.0128  | 0.0016  | -0.2846 | -0.0228 | -0.0035 |
|     |           |                   |                                      | -0.0359 | 0.0085  | -0.0107 | 0.0042  | -0.0160 |
| 41. | (1.98340) | BD (1) C 13- C 17 |                                      |         |         |         |         |         |
|     | (50.37%)  | 0.7097* C 13      | s(36.14%)p 1.76(63.78%)d 0.00(0.09%) | 0.0000  | 0.6010  | 0.0125  | 0.0032  | 0.0001  |
|     |           |                   |                                      | 0.0000  | -0.1028 | -0.0183 | 0.0042  | 0.5623  |
|     |           |                   |                                      | -0.0095 | 0.0006  | 0.5572  | -0.0097 | 0.0006  |
|     |           |                   |                                      | -0.0065 | -0.0061 | 0.0257  | -0.0099 | 0.0053  |
|     | (49.63%)  | 0.7045* C 17      | s(35.55%)p 1.81(64.36%)d 0.00(0.09%) | 0.0000  | 0.5962  | 0.0063  | 0.0038  | 0.0001  |
|     |           |                   |                                      | -0.0001 | 0.1484  | -0.0233 | 0.0017  | -0.5636 |
|     |           |                   |                                      | 0.0126  | 0.0038  | -0.5506 | 0.0117  | 0.0039  |
|     |           |                   |                                      | -0.0046 | -0.0042 | 0.0267  | -0.0114 | 0.0062  |
| 42. | (1.97486) | BD (1) C 13- H 30 |                                      |         |         |         |         |         |
|     | (60.25%)  | 0.7762* C 13      | s(28.56%)p 2.50(71.36%)d 0.00(0.07%) | -0.0003 | 0.5343  | -0.0035 | -0.0101 | -0.0002 |
|     |           |                   |                                      | 0.0001  | 0.7882  | 0.0036  | -0.0050 | -0.2290 |
|     |           |                   |                                      | -0.0028 | 0.0050  | -0.1997 | -0.0041 | 0.0050  |
|     |           |                   |                                      | -0.0123 | -0.0103 | 0.0033  | 0.0182  | -0.0111 |
|     | (39.75%)  | 0.6305* H 30      | s(99.94%)p 0.00(0.06%)               | 0.9997  | 0.0023  | 0.0003  | -0.0235 | 0.0043  |
|     |           |                   |                                      | 0.0021  |         |         |         |         |
| 43. | (1.98417) | BD (1) C 14- C 21 |                                      |         |         |         |         |         |
|     | (50.06%)  | 0.7076* C 14      | s(35.25%)p 1.83(64.66%)d 0.00(0.09%) | 0.0000  | 0.5936  | 0.0083  | 0.0036  | -0.0002 |
|     |           |                   |                                      | 0.0001  | -0.1012 | 0.0181  | -0.0045 | -0.2591 |
|     |           |                   |                                      | -0.0075 | 0.0035  | 0.7540  | -0.0169 | -0.0005 |
|     |           |                   |                                      | -0.0005 | -0.0032 | -0.0183 | -0.0030 | 0.0238  |
|     | (49.94%)  | 0.7067* C 21      | s(34.98%)p 1.86(64.93%)d 0.00(0.09%) | 0.0000  | 0.5914  | 0.0054  | 0.0039  | 0.0001  |
|     |           |                   |                                      | 0.0000  | 0.0443  | 0.0154  | -0.0027 | 0.2956  |
|     |           |                   |                                      | -0.0168 | 0.0002  | -0.7479 | 0.0100  | 0.0039  |
|     |           |                   |                                      | 0.0008  | -0.0057 | -0.0161 | -0.0022 | 0.0244  |
| 44. | (1.97619) | BD (1) C 14- H 31 |                                      |         |         |         |         |         |
|     | (61.65%)  | 0.7852* C 14      | s(30.05%)p 2.33(69.88%)d 0.00(0.07%) | 0.0004  | -0.5481 | 0.0050  | 0.0080  | -0.0003 |
|     |           |                   |                                      | 0.0002  | 0.5344  | 0.0075  | -0.0009 | -0.5634 |
|     |           |                   |                                      | -0.0036 | 0.0050  | 0.3094  | 0.0025  | -0.0047 |
|     |           |                   |                                      | 0.0190  | -0.0111 | 0.0120  | 0.0014  | 0.0070  |
|     | (38.35%)  | 0.6193* H 31      | s(99.95%)p 0.00(0.05%)               | -0.9997 | -0.0018 | 0.0004  | -0.0136 | 0.0161  |
|     |           |                   |                                      | -0.0077 |         |         |         |         |
| 45. | (1.97849) | BD (1) C 15- C 19 |                                      |         |         |         |         |         |
|     | (49.89%)  | 0.7063* C 15      | s(35.02%)p 1.85(64.88%)d 0.00(0.10%) | -0.0001 | 0.5917  | 0.0075  | 0.0045  | 0.0002  |
|     |           |                   |                                      | 0.0000  | 0.6167  | 0.0080  | 0.0001  | 0.3644  |
|     |           |                   |                                      | -0.0147 | 0.0050  | 0.3676  | -0.0146 | 0.0052  |
|     |           |                   |                                      | 0.0178  | 0.0182  | 0.0113  | 0.0126  | -0.0072 |
|     | (50.11%)  | 0.7079* C 19      | s(36.01%)p 1.77(63.91%)d 0.00(0.08%) | 0.0000  | 0.6001  | 0.0017  | 0.0056  | -0.0001 |
|     |           |                   |                                      | 0.0001  | -0.6322 | 0.0255  | 0.0032  | -0.3363 |
|     |           |                   |                                      | -0.0033 | 0.0034  | -0.3543 | -0.0026 | 0.0031  |
|     |           |                   |                                      | 0.0165  | 0.0173  | 0.0113  | 0.0095  | -0.0049 |
| 46. | (1.97496) | BD (1) C 15- H 33 |                                      |         |         |         |         |         |
|     | (60.93%)  | 0.7806* C 15      | s(28.12%)p 2.55(71.81%)d 0.00(0.07%) | 0.0004  | -0.5300 | 0.0149  | 0.0061  | 0.0001  |
|     |           |                   |                                      | -0.0003 | 0.7818  | 0.0105  | -0.0076 | -0.2411 |
|     |           |                   |                                      | -0.0039 | -0.0007 | -0.2205 | -0.0028 | 0.0002  |
|     |           |                   |                                      | 0.0120  | 0.0105  | -0.0029 | -0.0177 | 0.0106  |
|     | (39.07%)  | 0.6250* H 33      | s(99.92%)p 0.00(0.08%)               | -0.9996 | -0.0013 | -0.0025 | -0.0259 | 0.0077  |
|     |           |                   |                                      | 0.0083  |         |         |         |         |
| 47. | (1.97959) | BD (1) C 16- C 18 |                                      |         |         |         |         |         |
|     | (48.03%)  | 0.6931* C 16      | s(37.20%)p 1.69(62.70%)d 0.00(0.09%) | 0.0001  | -0.6090 | -0.0344 | 0.0021  | -0.0002 |
|     |           |                   |                                      | 0.0000  | -0.5386 | -0.0193 | -0.0054 | 0.5660  |
|     |           |                   |                                      | 0.0158  | 0.0048  | -0.1260 | 0.0088  | 0.0024  |
|     |           |                   |                                      | 0.0240  | -0.0091 | 0.0127  | 0.0035  | 0.0096  |
|     | (51.97%)  | 0.7209* C 18      | s(36.77%)p 1.72(63.14%)d 0.00(0.09%) | -0.0001 | -0.6063 | -0.0081 | -0.0016 | 0.0000  |
|     |           |                   |                                      | 0.0004  | 0.5122  | -0.0016 | -0.0040 | -0.5735 |
|     |           |                   |                                      | 0.0089  | 0.0039  | 0.1992  | -0.0181 | 0.0003  |
|     |           |                   |                                      | 0.0261  | -0.0057 | 0.0076  | 0.0018  | 0.0125  |
| 48. | (1.97140) | BD (1) C 16- C 22 |                                      |         |         |         |         |         |
|     | (46.41%)  | 0.6813* C 16      | s(35.00%)p 1.85(64.90%)d 0.00(0.10%) | -0.0001 | 0.5915  | 0.0126  | 0.0014  | 0.0005  |
|     |           |                   |                                      | 0.0004  | -0.5379 | -0.0145 | -0.0041 | 0.2456  |
|     |           |                   |                                      | 0.0078  | 0.0011  | 0.5467  | 0.0109  | 0.0032  |
|     |           |                   |                                      | -0.0103 | -0.0258 | 0.0067  | 0.0083  | 0.0119  |
|     | (53.59%)  | 0.7320* C 22      | s(34.87%)p 1.87(65.07%)d 0.00(0.06%) | -0.0001 | 0.5905  | 0.0028  | -0.0024 | 0.0000  |
|     |           |                   |                                      | -0.0002 | 0.5253  | -0.0040 | -0.0035 | -0.2142 |
|     |           |                   |                                      | 0.0037  | -0.0004 | -0.5734 | -0.0020 | 0.0062  |
|     |           |                   |                                      | -0.0088 | -0.0198 | 0.0058  | 0.0070  | 0.0085  |
| 49. | (1.85838) | BD (1) C 16-Ru 52 |                                      |         |         |         |         |         |
|     | (59.72%)  | 0.7728* C 16      | s(27.83%)p 2.59(72.16%)d 0.00(0.01%) | 0.0001  | -0.5265 | 0.0324  | -0.0024 | 0.0006  |
|     |           |                   |                                      | 0.0002  | 0.0237  | -0.0060 | -0.0018 | -0.3735 |
|     |           |                   |                                      | 0.0375  | -0.0010 | 0.7602  | -0.0477 | 0.0024  |
|     |           |                   |                                      | 0.0008  | -0.0009 | 0.0065  | 0.0024  | -0.0026 |
|     | (40.28%)  | 0.6347* Ru 52     | s(27.00%)p 0.00(0.05%)d 2.70(72.94%) | 0.0000  | 0.0000  | 0.0001  | -0.0007 | -0.5194 |
|     |           |                   |                                      | -0.0130 | 0.0091  | -0.0005 | -0.0009 | 0.0011  |
|     |           |                   |                                      | -0.0015 | 0.0005  | -0.0001 | 0.0000  | 0.0000  |
|     |           |                   |                                      | 0.0000  | -0.0001 | 0.0001  | 0.0000  | 0.0000  |

|     |           |                   |                                         |         |         |         |         |         |  |
|-----|-----------|-------------------|-----------------------------------------|---------|---------|---------|---------|---------|--|
|     |           |                   |                                         | 0.0004  | -0.0044 | -0.0046 | 0.0002  | 0.0000  |  |
|     |           |                   |                                         | 0.0000  | 0.0000  | 0.0000  | -0.0006 | -0.0062 |  |
|     |           |                   |                                         | 0.0091  | -0.0100 | 0.0002  | 0.0000  | 0.0000  |  |
|     |           |                   |                                         | 0.0000  | 0.0012  | 0.0134  | -0.0086 | 0.0038  |  |
|     |           |                   |                                         | -0.0003 | 0.0000  | 0.0000  | 0.0615  | -0.0116 |  |
|     |           |                   |                                         | 0.0024  | -0.0001 | 0.0000  | 0.0000  | -0.0838 |  |
|     |           |                   |                                         | -0.0079 | 0.0021  | -0.0003 | 0.0000  | 0.0001  |  |
|     |           |                   |                                         | 0.7381  | -0.0062 | 0.0005  | 0.0016  | 0.0000  |  |
|     |           |                   |                                         | 0.0000  | 0.3002  | -0.0017 | -0.0032 | 0.0006  |  |
|     |           |                   |                                         | 0.0000  | 0.0000  | -0.2888 | 0.0042  | -0.0040 |  |
|     |           |                   |                                         | -0.0010 | 0.0000  |         |         |         |  |
| 50. | (1.98463) | BD (1) C 17- C 19 |                                         |         |         |         |         |         |  |
|     | (50.20%)  | 0.7085* C 17      | s( 35.29%)p 1.83( 64.62%)d 0.00( 0.09%) |         |         |         |         |         |  |
|     |           |                   | 0.0000                                  | 0.5940  | 0.0051  | 0.0041  | 0.0001  |         |  |
|     |           |                   | -0.0001                                 | -0.7414 | 0.0083  | 0.0042  | 0.2350  |         |  |
|     |           |                   | -0.0179                                 | 0.0020  | 0.2017  | -0.0174 | 0.0021  |         |  |
|     |           |                   | -0.0119                                 | -0.0097 | 0.0041  | 0.0217  | -0.0129 |         |  |
|     | (49.80%)  | 0.7057* C 19      | s( 35.33%)p 1.83( 64.58%)d 0.00( 0.09%) |         |         |         |         |         |  |
|     |           |                   | 0.0000                                  | 0.5943  | 0.0078  | 0.0033  | 0.0000  |         |  |
|     |           |                   | 0.0001                                  | 0.7608  | -0.0222 | -0.0015 | -0.1971 |         |  |
|     |           |                   | -0.0098                                 | 0.0026  | -0.1655 | -0.0103 | 0.0027  |         |  |
|     |           |                   | -0.0136                                 | -0.0115 | 0.0042  | 0.0208  | -0.0126 |         |  |
| 51. | (1.64105) | BD (2) C 17- C 19 |                                         |         |         |         |         |         |  |
|     | (51.73%)  | 0.7193* C 17      | s( 0.00%)p 1.00( 99.98%)d 0.00( 0.02%)  |         |         |         |         |         |  |
|     |           |                   | 0.0000                                  | 0.0000  | -0.0010 | 0.0001  | 0.0000  |         |  |
|     |           |                   | 0.0000                                  | 0.0291  | 0.0002  | 0.0001  | 0.7022  |         |  |
|     |           |                   | 0.0122                                  | 0.0065  | -0.7110 | -0.0120 | -0.0064 |         |  |
|     |           |                   | -0.0104                                 | 0.0106  | -0.0005 | 0.0011  | 0.0034  |         |  |
|     | (48.27%)  | 0.6947* C 19      | s( 0.00%)p 1.00( 99.97%)d 0.00( 0.03%)  |         |         |         |         |         |  |
|     |           |                   | 0.0000                                  | -0.0003 | -0.0007 | 0.0001  | 0.0000  |         |  |
|     |           |                   | 0.0000                                  | 0.0266  | 0.0006  | 0.0003  | 0.7004  |         |  |
|     |           |                   | 0.0104                                  | 0.0056  | -0.7128 | -0.0107 | -0.0062 |         |  |
|     |           |                   | 0.0078                                  | -0.0084 | 0.0005  | 0.0063  | 0.0102  |         |  |
| 52. | (1.97742) | BD (1) C 17- H 34 |                                         |         |         |         |         |         |  |
|     | (60.90%)  | 0.7804* C 17      | s( 29.11%)p 2.43( 70.81%)d 0.00( 0.08%) |         |         |         |         |         |  |
|     |           |                   | -0.0004                                 | 0.5394  | -0.0090 | -0.0073 | -0.0001 |         |  |
|     |           |                   | 0.0001                                  | 0.6525  | 0.0079  | -0.0038 | 0.3644  |         |  |
|     |           |                   | 0.0045                                  | -0.0007 | 0.3865  | 0.0042  | -0.0010 |         |  |
|     |           |                   | 0.0166                                  | 0.0174  | 0.0083  | 0.0098  | -0.0050 |         |  |
|     | (39.10%)  | 0.6253* H 34      | s( 99.96%)p 0.00( 0.04%)                |         |         |         |         |         |  |
|     |           |                   | 0.9998                                  | 0.0022  | 0.0005  | -0.0146 | -0.0083 |         |  |
|     |           |                   | -0.0093                                 |         |         |         |         |         |  |
| 53. | (1.97863) | BD (1) C 18- C 24 |                                         |         |         |         |         |         |  |
|     | (49.88%)  | 0.7063* C 18      | s( 35.03%)p 1.85( 64.87%)d 0.00( 0.10%) |         |         |         |         |         |  |
|     |           |                   | -0.0001                                 | 0.5918  | 0.0077  | 0.0045  | 0.0002  |         |  |
|     |           |                   | 0.0000                                  | 0.0242  | -0.0163 | 0.0043  | -0.3525 |         |  |
|     |           |                   | 0.0149                                  | -0.0049 | 0.7234  | -0.0003 | 0.0025  |         |  |
|     |           |                   | -0.0013                                 | -0.0008 | -0.0205 | -0.0043 | 0.0234  |         |  |
|     | (50.12%)  | 0.7079* C 24      | s( 36.03%)p 1.77( 63.89%)d 0.00( 0.08%) |         |         |         |         |         |  |
|     |           |                   | 0.0000                                  | 0.6002  | 0.0018  | 0.0056  | -0.0001 |         |  |
|     |           |                   | 0.0001                                  | -0.0060 | -0.0143 | 0.0012  | 0.3240  |         |  |
|     |           |                   | 0.0039                                  | -0.0033 | -0.7302 | 0.0210  | 0.0043  |         |  |
|     |           |                   | -0.0019                                 | 0.0017  | -0.0194 | -0.0044 | 0.0203  |         |  |
| 54. | (1.65806) | BD (2) C 18- C 24 |                                         |         |         |         |         |         |  |
|     | (51.14%)  | 0.7151* C 18      | s( 0.00%)p 1.00( 99.97%)d 0.00( 0.03%)  |         |         |         |         |         |  |
|     |           |                   | 0.0000                                  | 0.0001  | 0.0000  | 0.0001  | 0.0000  |         |  |
|     |           |                   | 0.0000                                  | 0.6509  | 0.0046  | 0.0057  | 0.6906  |         |  |
|     |           |                   | 0.0069                                  | 0.0063  | 0.3146  | 0.0018  | 0.0030  |         |  |
|     |           |                   | -0.0052                                 | 0.0081  | 0.0110  | -0.0039 | 0.0084  |         |  |
|     | (48.86%)  | 0.6990* C 24      | s( 0.00%)p 1.00( 99.97%)d 0.00( 0.03%)  |         |         |         |         |         |  |
|     |           |                   | 0.0000                                  | 0.0020  | 0.0005  | -0.0001 | 0.0000  |         |  |
|     |           |                   | 0.0000                                  | 0.6496  | 0.0079  | 0.0058  | 0.6960  |         |  |
|     |           |                   | 0.0088                                  | 0.0061  | 0.3051  | 0.0037  | 0.0026  |         |  |
|     |           |                   | 0.0027                                  | -0.0095 | -0.0046 | -0.0117 | -0.0062 |         |  |
| 55. | (1.97499) | BD (1) C 18- H 32 |                                         |         |         |         |         |         |  |
|     | (60.93%)  | 0.7806* C 18      | s( 28.15%)p 2.55( 71.78%)d 0.00( 0.07%) |         |         |         |         |         |  |
|     |           |                   | -0.0004                                 | 0.5304  | -0.0149 | -0.0061 | -0.0001 |         |  |
|     |           |                   | 0.0003                                  | 0.5588  | 0.0073  | -0.0037 | -0.2625 |         |  |
|     |           |                   | -0.0040                                 | -0.0006 | -0.5800 | -0.0078 | 0.0066  |         |  |
|     |           |                   | -0.0088                                 | -0.0206 | 0.0097  | 0.0077  | 0.0057  |         |  |
|     | (39.07%)  | 0.6250* H 32      | s( 99.92%)p 0.00( 0.08%)                |         |         |         |         |         |  |
|     |           |                   | 0.9996                                  | 0.0012  | 0.0025  | -0.0196 | 0.0085  |         |  |
|     |           |                   | 0.0187                                  |         |         |         |         |         |  |
| 56. | (1.97665) | BD (1) C 19- H 35 |                                         |         |         |         |         |         |  |
|     | (60.88%)  | 0.7803* C 19      | s( 28.61%)p 2.49( 71.31%)d 0.00( 0.08%) |         |         |         |         |         |  |
|     |           |                   | -0.0004                                 | 0.5348  | -0.0064 | -0.0085 | 0.0001  |         |  |
|     |           |                   | -0.0001                                 | -0.1361 | -0.0001 | 0.0029  | 0.5971  |         |  |
|     |           |                   | 0.0083                                  | -0.0018 | 0.5813  | 0.0077  | -0.0016 |         |  |
|     |           |                   | -0.0059                                 | -0.0058 | 0.0232  | -0.0125 | 0.0063  |         |  |
|     | (39.12%)  | 0.6255* H 35      | s( 99.96%)p 0.00( 0.04%)                |         |         |         |         |         |  |
|     |           |                   | 0.9998                                  | 0.0021  | 0.0000  | 0.0034  | -0.0130 |         |  |
|     |           |                   | -0.0132                                 |         |         |         |         |         |  |
| 57. | (1.97250) | BD (1) C 20- C 22 |                                         |         |         |         |         |         |  |
|     | (50.93%)  | 0.7137* C 20      | s( 34.65%)p 1.88( 65.30%)d 0.00( 0.05%) |         |         |         |         |         |  |
|     |           |                   | -0.0003                                 | 0.5885  | -0.0130 | 0.0016  | -0.0004 |         |  |
|     |           |                   | 0.0000                                  | 0.5395  | -0.0151 | -0.0027 | -0.5573 |         |  |
|     |           |                   | 0.0130                                  | 0.0011  | 0.2257  | -0.0004 | 0.0021  |         |  |
|     |           |                   | -0.0174                                 | 0.0060  | -0.0055 | -0.0007 | -0.0098 |         |  |
|     | (49.07%)  | 0.7005* C 22      | s( 30.47%)p 2.28( 69.46%)d 0.00( 0.07%) |         |         |         |         |         |  |
|     |           |                   | -0.0002                                 | 0.5519  | -0.0082 | 0.0013  | -0.0002 |         |  |
|     |           |                   | 0.0003                                  | -0.5678 | 0.0083  | -0.0016 | 0.5855  |         |  |
|     |           |                   | -0.0102                                 | 0.0006  | -0.1708 | 0.0074  | 0.0018  |         |  |
|     |           |                   | -0.0216                                 | 0.0073  | -0.0074 | -0.0006 | -0.0110 |         |  |
| 58. | (1.97966) | BD (1) C 20- C 23 |                                         |         |         |         |         |         |  |
|     | (50.27%)  | 0.7090* C 20      | s( 35.44%)p 1.82( 64.50%)d 0.00( 0.07%) |         |         |         |         |         |  |
|     |           |                   | -0.0002                                 | 0.5953  | -0.0001 | -0.0024 | 0.0001  |         |  |
|     |           |                   | 0.0000                                  | -0.5887 | 0.0155  | -0.0013 | 0.2537  |         |  |
|     |           |                   | -0.0120                                 | 0.0001  | 0.4833  | 0.0012  | 0.0020  |         |  |
|     |           |                   | -0.0103                                 | -0.0190 | 0.0094  | 0.0100  | -0.0006 |         |  |
|     | (49.73%)  | 0.7052* C 23      | s( 34.40%)p 1.90( 65.50%)d 0.00( 0.09%) |         |         |         |         |         |  |
|     |           |                   | 0.0000                                  | 0.5865  | -0.0072 | 0.0068  | 0.0002  |         |  |
|     |           |                   | -0.0002                                 | 0.6007  | -0.0114 | -0.0022 | -0.2720 |         |  |
|     |           |                   | 0.0080                                  | 0.0002  | -0.4690 | 0.0011  | 0.0037  |         |  |
|     |           |                   | -0.0124                                 | -0.0236 | 0.0089  | 0.0113  | 0.0032  |         |  |
| 59. | (1.98126) | BD (1) C 20- N 50 |                                         |         |         |         |         |         |  |
|     | (40.69%)  | 0.6379* C 20      | s( 29.92%)p 2.34( 70.01%)d 0.00( 0.07%) |         |         |         |         |         |  |
|     |           |                   | 0.0001                                  | -0.5466 | -0.0197 | 0.0008  | -0.0004 |         |  |
|     |           |                   | -0.0002                                 | -0.0565 | -0.0065 | -0.0006 | -0.3186 |         |  |
|     |           |                   | -0.0004                                 | 0.0001  | 0.7716  | 0.0098  | 0.0013  |         |  |
|     |           |                   | -0.0001                                 | 0.0029  | 0.0163  | 0.0031  | -0.0207 |         |  |
|     | (59.31%)  | 0.7701* N 50      | s( 33.94%)p 1.94( 65.88%)d 0.01( 0.18%) |         |         |         |         |         |  |
|     |           |                   | 0.0001                                  | -0.5824 | -0.0135 | 0.0005  | -0.0007 |         |  |
|     |           |                   | 0.0002                                  | 0.0647  | -0.0066 | -0.0015 | 0.3034  |         |  |
|     |           |                   | 0.0105                                  | 0.0019  | -0.7498 | -0.0143 | -0.0012 |         |  |
|     |           |                   | 0.0003                                  | 0.0153  | 0.0204  | 0.0003  | -0.0332 |         |  |
| 60. | (1.71962) | BD (2) C 20- N 50 |                                         |         |         |         |         |         |  |

|               |                     |                       |                                         |                                        |                                        |                                        |                                        |
|---------------|---------------------|-----------------------|-----------------------------------------|----------------------------------------|----------------------------------------|----------------------------------------|----------------------------------------|
|               | ( 34.10%)           | 0.5839* C 20          | s( 0.00%)p 1.00( 99.92%)d 0.00( 0.08%)  | 0.0000 0.0036 0.0010 0.0002 -0.0001    | 0.0000 0.5978 0.0243 -0.0015 0.7221    | 0.0289 -0.0023 0.3445 0.0153 -0.0007   | 0.0054 -0.0155 -0.0133 -0.0130 -0.0145 |
|               | ( 65.90%)           | 0.8118* N 50          | s( 0.00%)p 1.00( 99.91%)d 0.00( 0.09%)  | 0.0000 0.0014 0.0000 0.0007 -0.0001    | 0.0000 0.5824 0.0193 -0.0009 0.7341    | 0.0243 -0.0013 0.3460 0.0146 -0.0010   | -0.0127 0.0054 0.0179 -0.0159 0.0135   |
| 61. (1.98409) | BD ( 1) C ( 49.75%) | 21- C 23 0.7053* C 21 | s( 35.54%)p 1.81( 64.36%)d 0.00( 0.09%) | 0.0000 0.5961 0.0058 0.0039 0.0001     | -0.0001 0.5200 -0.0014 -0.0047 -0.5375 | 0.0118 0.0038 0.2891 -0.0236 0.0001    | -0.0246 0.0098 -0.0111 0.0003 -0.0101  |
|               | ( 50.25%)           | 0.7089* C 23          | s( 35.95%)p 1.78( 63.96%)d 0.00( 0.09%) | 0.0000 0.5994 0.0131 0.0032 0.0001     | -0.0001 -0.5311 0.0167 -0.0021 0.5440  | -0.0066 -0.0002 -0.2472 -0.0144 0.0043 | -0.0233 0.0110 -0.0139 -0.0009 -0.0072 |
| 62. (1.66342) | BD ( 2) C ( 48.05%) | 21- C 23 0.6932* C 21 | s( 0.00%)p 1.00( 99.96%)d 0.00( 0.04%)  | 0.0000 -0.0017 0.0009 -0.0002 0.0000   | -0.0001 0.5864 0.0074 0.0052 0.7410    | 0.0099 0.0071 0.3262 0.0041 0.0028     | 0.0051 0.0036 -0.0064 0.0184 -0.0015   |
|               | ( 51.95%)           | 0.7207* C 23          | s( 0.00%)p 1.00( 99.96%)d 0.00( 0.04%)  | 0.0000 -0.0022 0.0010 -0.0002 -0.0001  | -0.0001 0.5934 0.0061 0.0056 0.7327    | 0.0072 0.0069 0.3323 0.0039 0.0035     | 0.0024 -0.0104 -0.0076 -0.0102 -0.0087 |
| 63. (1.97829) | BD ( 1) C ( 61.42%) | 21- H 37 0.7837* C 21 | s( 29.42%)p 2.40( 70.50%)d 0.00( 0.08%) | 0.0003 -0.5423 0.0086 0.0070 0.0001    | -0.0001 0.6184 0.0100 -0.0007 -0.2710  | -0.0036 0.0001 -0.4990 -0.0081 0.0015  | 0.0105 0.0211 -0.0097 -0.0108 -0.0005  |
|               | ( 38.58%)           | 0.6211* H 37          | s( 99.96%)p 0.00( 0.04%)                | -0.9998 -0.0021 -0.0002 -0.0138 0.0065 | 0.0116                                 |                                        |                                        |
| 64. (1.97412) | BD ( 1) C ( 50.92%) | 22- C 25 0.7136* C 22 | s( 34.61%)p 1.89( 65.32%)d 0.00( 0.07%) | -0.0003 0.5883 0.0063 -0.0002 0.0003   | 0.0000 0.0040 -0.0057 0.0001 -0.3357   | 0.0088 -0.0010 0.7351 -0.0040 0.0027   | -0.0008 -0.0009 -0.0163 -0.0033 0.0194 |
|               | ( 49.08%)           | 0.7006* C 25          | s( 35.21%)p 1.84( 64.71%)d 0.00( 0.08%) | 0.0000 0.5933 -0.0063 0.0078 0.0002    | -0.0002 -0.0447 0.0063 -0.0003 0.3525  | -0.0108 -0.0013 -0.7215 0.0094 0.0030  | -0.0024 0.0002 -0.0188 -0.0040 0.0208  |
| 65. (1.97410) | BD ( 1) C ( 61.21%) | 23- H 38 0.7824* C 23 | s( 29.60%)p 2.38( 70.33%)d 0.00( 0.07%) | -0.0004 0.5440 -0.0033 -0.0092 -0.0002 | 0.0002 -0.0598 0.0002 -0.0037 -0.3034  | -0.0027 0.0057 0.7794 0.0048 -0.0061   | 0.0005 -0.0028 -0.0158 -0.0029 0.0202  |
|               | ( 38.79%)           | 0.6228* H 38          | s( 99.94%)p 0.00( 0.06%)                | -0.9997 0.0021 0.0001 0.0031 0.0078    | -0.0230                                |                                        |                                        |
| 66. (1.98460) | BD ( 1) C ( 49.80%) | 24- C 26 0.7057* C 24 | s( 35.31%)p 1.83( 64.60%)d 0.00( 0.09%) | 0.0000 0.5941 0.0077 0.0033 0.0000     | 0.0001 -0.5059 0.0016 0.0031 0.2134    | 0.0093 -0.0026 0.5864 -0.0244 -0.0001  | -0.0107 -0.0238 0.0106 0.0087 0.0072   |
|               | ( 50.20%)           | 0.7085* C 26          | s( 35.27%)p 1.83( 64.64%)d 0.00( 0.09%) | 0.0000 0.5938 0.0050 0.0041 0.0001     | -0.0001 0.5282 -0.0189 -0.0003 -0.2507 | 0.0180 -0.0019 -0.5513 -0.0014 0.0047  | -0.0098 -0.0235 0.0092 0.0083 0.0091   |
| 67. (1.97665) | BD ( 1) C ( 60.91%) | 24- H 36 0.7805* C 24 | s( 28.62%)p 2.49( 71.30%)d 0.00( 0.08%) | -0.0004 0.5349 -0.0065 -0.0085 0.0001  | -0.0001 0.5664 0.0068 -0.0028 -0.6034  | -0.0084 0.0018 0.1670 0.0037 0.0018    | -0.0230 0.0069 -0.0064 -0.0015 -0.0134 |
|               | ( 39.09%)           | 0.6252* H 36          | s( 99.96%)p 0.00( 0.04%)                | -0.9998 0.0021 0.0000 -0.0131 0.0132   | -0.0035                                |                                        |                                        |
| 68. (1.98339) | BD ( 1) C ( 50.38%) | 25- C 26 0.7098* C 25 | s( 36.16%)p 1.76( 63.75%)d 0.00( 0.09%) | 0.0000 0.6012 0.0125 0.0033 0.0001     | 0.0000 0.5311 0.0003 -0.0015 -0.5665   | 0.0091 -0.0005 0.1842 -0.0208 0.0040   | -0.0256 0.0049 -0.0071 -0.0005 -0.0116 |
|               | ( 49.62%)           | 0.7044* C 26          | s( 35.56%)p 1.81( 64.35%)d 0.00( 0.09%) | 0.0000 0.5963 0.0064 0.0037 0.0001     | -0.0001 -0.5466 0.0211 0.0025 0.5691   | -0.0131 -0.0037 -0.1413 -0.0148 0.0034 | -0.0255 0.0071 -0.0092 -0.0017 -0.0115 |
| 69. (1.69282) | BD ( 2) C ( 48.91%) | 25- C 26 0.6994* C 25 | s( 0.00%)p 1.00( 99.97%)d 0.00( 0.03%)  | 0.0000 -0.0015 0.0016 -0.0001 0.0000   | -0.0001 0.6454 0.0102 0.0060 0.7014    | 0.0115 0.0071 0.3014 0.0048 0.0031     | 0.0015 0.0023 -0.0047 0.0150 -0.0007   |
|               | ( 51.09%)           | 0.7148* C 26          | s( 0.00%)p 1.00( 99.97%)d 0.00( 0.03%)  | 0.0000 -0.0012 0.0012 -0.0001 0.0000   | 0.0000 0.6481 0.0109 0.0056 0.6986     | 0.0111 0.0060 0.3020 0.0051 0.0027     | 0.0017 -0.0086 -0.0036 -0.0121 -0.0050 |
| 70. (1.97485) | BD ( 1) C ( 60.23%) | 25- H 39 0.7761* C 25 | s( 28.58%)p 2.50( 71.34%)d 0.00( 0.07%) | 0.0003 -0.5345 0.0034 0.0102 0.0002    | -0.0001 -0.5462 0.0052 -0.0067 -0.2483 | -0.0031 0.0051 -0.5944 -0.0009 0.0020  | 0.0093 0.0210 -0.0097 -0.0077 -0.0062  |
|               | ( 39.77%)           | 0.6306* H 39          | s( 99.94%)p 0.00( 0.06%)                | -0.9997 -0.0022 -0.0002 -0.0129 0.0045 | 0.0198                                 |                                        |                                        |
| 71. (1.97737) | BD ( 1) C ( 60.92%) | 26- H 40 0.7805* C 26 | s( 29.12%)p 2.43( 70.80%)d 0.00( 0.08%) | -0.0004 0.5395 -0.0090 -0.0073 -0.0001 | 0.0001 0.0243 -0.0001 0.0010 -0.3518   |                                        |                                        |

















|      |                         |                                         |         |         |         |         |
|------|-------------------------|-----------------------------------------|---------|---------|---------|---------|
|      |                         | 0.0000                                  | 0.2425  | -0.0072 | -0.0005 | 0.9666  |
|      |                         | -0.0203                                 | -0.0010 | -0.0549 | 0.0045  | 0.0002  |
|      |                         | -0.0139                                 | 0.0041  | 0.0114  | -0.0109 | -0.0039 |
| 152. | (1.97792) LP ( 1) O 46  | s( 56.34%)p 0.77( 43.52%)d 0.00( 0.14%) |         |         |         |         |
|      |                         | -0.0004                                 | 0.7504  | 0.0163  | 0.0016  | 0.0000  |
|      |                         | 0.0000                                  | 0.5085  | 0.0058  | 0.0029  | -0.3433 |
|      |                         | -0.0047                                 | -0.0018 | -0.2422 | -0.0035 | -0.0014 |
|      |                         | 0.0258                                  | 0.0185  | -0.0122 | -0.0111 | 0.0113  |
| 153. | (1.97818) LP ( 1) O 47  | s( 57.21%)p 0.75( 42.65%)d 0.00( 0.13%) |         |         |         |         |
|      |                         | -0.0004                                 | 0.7563  | 0.0147  | 0.0014  | 0.0000  |
|      |                         | 0.0000                                  | -0.3689 | -0.0044 | -0.0020 | -0.4466 |
|      |                         | -0.0050                                 | -0.0024 | -0.3016 | -0.0041 | -0.0016 |
|      |                         | -0.0247                                 | -0.0164 | -0.0196 | 0.0050  | 0.0066  |
| 154. | (1.97768) LP ( 1) O 48  | s( 56.20%)p 0.78( 43.66%)d 0.00( 0.14%) |         |         |         |         |
|      |                         | -0.0004                                 | 0.7495  | 0.0165  | 0.0016  | 0.0000  |
|      |                         | 0.0000                                  | -0.4566 | -0.0061 | -0.0026 | 0.3292  |
|      |                         | 0.0043                                  | 0.0018  | 0.3459  | 0.0034  | 0.0021  |
|      |                         | 0.0221                                  | 0.0240  | -0.0170 | -0.0077 | 0.0030  |
| 155. | (1.65970) LP ( 1) N 49  | s( 30.57%)p 2.27( 69.43%)d 0.00( 0.01%) |         |         |         |         |
|      |                         | 0.0007                                  | 0.5520  | -0.0313 | 0.0006  | -0.0007 |
|      |                         | 0.0002                                  | -0.7224 | 0.0445  | 0.0002  | 0.2567  |
|      |                         | -0.0208                                 | -0.0009 | 0.3220  | -0.0225 | -0.0006 |
|      |                         | 0.0024                                  | 0.0046  | -0.0003 | -0.0046 | 0.0022  |
| 156. | (1.67087) LP ( 1) N 50  | s( 30.82%)p 2.24( 69.18%)d 0.00( 0.01%) |         |         |         |         |
|      |                         | 0.0007                                  | 0.5542  | -0.0313 | 0.0007  | -0.0007 |
|      |                         | 0.0002                                  | 0.6201  | -0.0411 | -0.0005 | -0.2654 |
|      |                         | 0.0219                                  | 0.0008  | -0.4836 | 0.0288  | -0.0002 |
|      |                         | 0.0020                                  | 0.0068  | -0.0023 | -0.0037 | 0.0000  |
| 157. | (1.76340) LP ( 1) Ru 51 | s( 0.00%)p 0.00( 0.00%)d 1.00( 99.99%)  |         |         |         |         |
|      |                         | 0.0000                                  | 0.0000  | 0.0000  | 0.0005  | 0.0012  |
|      |                         | 0.0034                                  | -0.0005 | -0.0011 | 0.0002  | -0.0002 |
|      |                         | 0.0001                                  | 0.0000  | 0.0000  | 0.0000  | 0.0000  |
|      |                         | 0.0000                                  | 0.0000  | 0.0000  | 0.0000  | 0.0000  |
|      |                         | -0.0007                                 | 0.0025  | -0.0001 | 0.0004  | 0.0001  |
|      |                         | 0.0000                                  | 0.0000  | 0.0000  | 0.0004  | -0.0018 |
|      |                         | -0.0011                                 | -0.0001 | 0.0000  | 0.0000  | 0.0000  |
|      |                         | 0.0000                                  | 0.0014  | -0.0036 | -0.0040 | -0.0017 |
|      |                         | -0.0001                                 | 0.0000  | 0.0000  | 0.3724  | 0.0010  |
|      |                         | 0.0026                                  | 0.0000  | 0.0000  | 0.0000  | -0.2380 |
|      |                         | 0.0067                                  | -0.0018 | 0.0004  | 0.0000  | 0.0000  |
|      |                         | -0.5085                                 | 0.0051  | -0.0026 | 0.0004  | 0.0000  |
|      |                         | 0.0000                                  | 0.2981  | 0.0006  | 0.0006  | -0.0001 |
|      |                         | 0.0000                                  | 0.0000  | -0.6759 | 0.0143  | -0.0036 |
|      |                         | 0.0002                                  | 0.0001  |         |         |         |
| 158. | (1.71227) LP ( 2) Ru 51 | s( 0.00%)p 1.00( 0.02%)d99.99( 99.97%)  |         |         |         |         |
|      |                         | 0.0000                                  | 0.0000  | 0.0001  | -0.0016 | 0.0045  |
|      |                         | -0.0034                                 | 0.0024  | 0.0019  | -0.0003 | 0.0015  |
|      |                         | 0.0001                                  | -0.0001 | 0.0001  | 0.0000  | 0.0000  |
|      |                         | 0.0000                                  | 0.0000  | 0.0000  | 0.0000  | 0.0000  |
|      |                         | -0.0006                                 | 0.0061  | -0.0047 | -0.0016 | 0.0000  |
|      |                         | 0.0000                                  | 0.0000  | 0.0000  | 0.0022  | 0.0024  |
|      |                         | -0.0109                                 | -0.0039 | -0.0002 | 0.0000  | 0.0000  |
|      |                         | 0.0000                                  | 0.0006  | 0.0029  | -0.0037 | -0.0009 |
|      |                         | 0.0000                                  | 0.0000  | 0.0000  | -0.0301 | 0.0019  |
|      |                         | -0.0005                                 | 0.0007  | 0.0000  | 0.0000  | 0.4880  |
|      |                         | -0.0124                                 | 0.0025  | 0.0004  | 0.0000  | 0.0000  |
|      |                         | -0.1063                                 | 0.0021  | -0.0001 | 0.0001  | 0.0000  |
|      |                         | 0.0001                                  | 0.8268  | -0.0005 | 0.0030  | -0.0008 |
|      |                         | 0.0000                                  | 0.0000  | 0.2558  | -0.0104 | 0.0020  |
|      |                         | -0.0003                                 | 0.0000  |         |         |         |
| 159. | (1.66503) LP ( 3) Ru 51 | s( 0.01%)p 0.00( 0.01%)d 1.00( 99.98%)  |         |         |         |         |
|      |                         | 0.0000                                  | 0.0000  | -0.0001 | 0.0003  | 0.0079  |
|      |                         | -0.0003                                 | -0.0001 | 0.0007  | 0.0014  | 0.0001  |
|      |                         | 0.0005                                  | -0.0001 | 0.0000  | 0.0000  | 0.0000  |
|      |                         | 0.0000                                  | 0.0000  | 0.0000  | 0.0000  | 0.0000  |
|      |                         | 0.0013                                  | 0.0031  | -0.0048 | -0.0020 | -0.0002 |
|      |                         | 0.0000                                  | 0.0000  | 0.0000  | -0.0013 | -0.0032 |
|      |                         | 0.0062                                  | 0.0023  | 0.0001  | 0.0000  | 0.0000  |
|      |                         | 0.0000                                  | 0.0000  | 0.0011  | -0.0007 | -0.0005 |
|      |                         | 0.0000                                  | 0.0000  | -0.0001 | -0.5754 | 0.0042  |
|      |                         | 0.0001                                  | 0.0013  | 0.0000  | 0.0000  | 0.5147  |
|      |                         | -0.0091                                 | -0.0002 | -0.0002 | 0.0000  | 0.0000  |
|      |                         | 0.0864                                  | -0.0008 | 0.0001  | 0.0004  | 0.0000  |
|      |                         | 0.0000                                  | -0.1226 | 0.0008  | 0.0000  | 0.0003  |
|      |                         | 0.0000                                  | 0.0000  | -0.6172 | 0.0139  | 0.0010  |
|      |                         | 0.0004                                  | 0.0000  |         |         |         |
| 160. | (1.77295) LP ( 1) Ru 52 | s( 0.01%)p 0.00( 0.01%)d 1.00( 99.99%)  |         |         |         |         |
|      |                         | 0.0000                                  | 0.0000  | 0.0000  | -0.0001 | 0.0087  |
|      |                         | 0.0000                                  | 0.0003  | 0.0020  | -0.0005 | -0.0002 |
|      |                         | -0.0001                                 | 0.0000  | 0.0000  | 0.0000  | 0.0000  |
|      |                         | 0.0000                                  | 0.0000  | 0.0000  | 0.0000  | 0.0000  |
|      |                         | -0.0014                                 | 0.0037  | 0.0028  | 0.0016  | 0.0001  |
|      |                         | 0.0000                                  | 0.0000  | 0.0000  | 0.0008  | -0.0011 |
|      |                         | -0.0016                                 | -0.0006 | 0.0000  | 0.0000  | 0.0000  |
|      |                         | 0.0000                                  | -0.0004 | -0.0040 | 0.0018  | 0.0003  |
|      |                         | 0.0000                                  | 0.0000  | 0.0000  | -0.6190 | 0.0027  |
|      |                         | -0.0037                                 | 0.0004  | 0.0000  | 0.0000  | 0.7407  |
|      |                         | -0.0091                                 | 0.0037  | -0.0005 | -0.0001 | 0.0000  |
|      |                         | 0.0150                                  | 0.0012  | 0.0004  | 0.0003  | 0.0000  |
|      |                         | 0.0000                                  | 0.0710  | -0.0065 | 0.0005  | -0.0001 |
|      |                         | 0.0000                                  | 0.0000  | -0.2504 | 0.0009  | -0.0003 |
|      |                         | -0.0001                                 | 0.0000  |         |         |         |
| 161. | (1.71317) LP ( 2) Ru 52 | s( 0.01%)p 1.00( 0.03%)d99.99( 99.97%)  |         |         |         |         |
|      |                         | 0.0000                                  | 0.0000  | -0.0001 | 0.0019  | 0.0020  |
|      |                         | 0.0057                                  | -0.0026 | -0.0016 | 0.0002  | -0.0018 |
|      |                         | 0.0000                                  | 0.0000  | 0.0000  | 0.0000  | 0.0000  |
|      |                         | 0.0000                                  | 0.0000  | 0.0000  | 0.0000  | 0.0000  |
|      |                         | -0.0004                                 | 0.0014  | 0.0008  | 0.0000  | 0.0000  |
|      |                         | 0.0000                                  | 0.0000  | 0.0000  | 0.0022  | 0.0019  |
|      |                         | -0.0107                                 | -0.0040 | -0.0002 | 0.0000  | 0.0000  |
|      |                         | 0.0000                                  | -0.0001 | -0.0090 | 0.0052  | 0.0016  |
|      |                         | 0.0001                                  | 0.0000  | 0.0000  | 0.0437  | 0.0035  |
|      |                         | 0.0004                                  | -0.0004 | 0.0000  | 0.0000  | -0.1997 |
|      |                         | 0.0130                                  | -0.0022 | -0.0002 | 0.0000  | -0.0001 |
|      |                         | -0.1623                                 | 0.0008  | -0.0010 | 0.0007  | 0.0000  |
|      |                         | -0.0001                                 | -0.4709 | 0.0029  | -0.0023 | 0.0007  |
|      |                         | 0.0000                                  | 0.0000  | -0.8423 | 0.0122  | -0.0035 |
|      |                         | 0.0001                                  | 0.0000  |         |         |         |
| 162. | (1.66584) LP ( 3) Ru 52 | s( 0.00%)p 1.00( 0.01%)d99.99( 99.99%)  |         |         |         |         |
|      |                         | 0.0000                                  | 0.0000  | -0.0001 | 0.0003  | 0.0057  |
|      |                         | -0.0007                                 | -0.0002 | 0.0006  | 0.0014  | 0.0003  |
|      |                         | 0.0004                                  | -0.0001 | 0.0000  | 0.0000  | 0.0000  |
|      |                         | 0.0000                                  | 0.0000  | 0.0000  | 0.0000  | 0.0000  |
|      |                         | -0.0008                                 | 0.0004  | 0.0018  | 0.0006  | 0.0001  |
|      |                         | 0.0000                                  | 0.0000  | 0.0000  | 0.0015  | 0.0034  |
|      |                         | -0.0068                                 | -0.0025 | -0.0001 | 0.0000  | 0.0000  |

|      |                        |                                          |         |         |         |         |
|------|------------------------|------------------------------------------|---------|---------|---------|---------|
|      |                        | 0.0000                                   | 0.0011  | 0.0036  | -0.0039 | -0.0017 |
|      |                        | -0.0002                                  | 0.0000  | 0.0000  | -0.3279 | 0.0034  |
|      |                        | -0.0002                                  | 0.0003  | 0.0000  | 0.0000  | -0.0975 |
|      |                        | 0.0045                                   | 0.0004  | 0.0000  | 0.0000  | 0.0000  |
|      |                        | 0.4567                                   | -0.0024 | -0.0003 | -0.0013 | 0.0000  |
|      |                        | -0.0001                                  | -0.7487 | 0.0134  | 0.0004  | 0.0007  |
|      |                        | 0.0000                                   | 0.0000  | 0.3368  | -0.0083 | -0.0005 |
|      |                        | 0.0000                                   | 0.0000  |         |         |         |
| 163. | (1.99093) LP ( 1)Cl 53 | s( 71.85%)p 0.39( 28.15%)d 0.00( 0.01%)  |         |         |         |         |
|      |                        | 0.0000                                   | 0.0000  | 0.8476  | 0.0106  | 0.0015  |
|      |                        | -0.0001                                  | 0.0002  | 0.0000  | 0.0001  | 0.2873  |
|      |                        | -0.0017                                  | 0.0002  | -0.0003 | 0.0000  | -0.0020 |
|      |                        | 0.0000                                   | 0.0000  | 0.0000  | 0.0001  | 0.4460  |
|      |                        | -0.0026                                  | 0.0003  | -0.0004 | 0.0001  | -0.0057 |
|      |                        | -0.0001                                  | -0.0028 | -0.0048 |         |         |
| 164. | (1.97091) LP ( 2)Cl 53 | s( 0.01%)p 1.00( 99.97%)d 0.00( 0.02%)   |         |         |         |         |
|      |                        | 0.0000                                   | 0.0000  | 0.0098  | 0.0002  | 0.0002  |
|      |                        | 0.0000                                   | 0.0000  | 0.0000  | 0.0000  | -0.8204 |
|      |                        | -0.0004                                  | 0.0020  | 0.0002  | 0.0000  | 0.2563  |
|      |                        | -0.0030                                  | -0.0011 | -0.0002 | 0.0000  | 0.5109  |
|      |                        | -0.0001                                  | -0.0012 | -0.0002 | -0.0013 | 0.0061  |
|      |                        | -0.0023                                  | 0.0064  | -0.0109 |         |         |
| 165. | (1.67716) LP ( 3)Cl 53 | s( 24.71%)p 3.04( 75.21%)d 0.00( 0.08%)  |         |         |         |         |
|      |                        | 0.0000                                   | 0.0000  | 0.4968  | -0.0188 | -0.0027 |
|      |                        | 0.0001                                   | -0.0003 | 0.0000  | 0.0001  | -0.3392 |
|      |                        | -0.0022                                  | 0.0017  | -0.0002 | 0.0000  | 0.3373  |
|      |                        | -0.0012                                  | 0.0015  | 0.0001  | 0.0001  | -0.7233 |
|      |                        | -0.0054                                  | 0.0014  | -0.0004 | 0.0013  | 0.0185  |
|      |                        | -0.0151                                  | -0.0091 | 0.0105  |         |         |
| 166. | (1.66947) LP ( 4)Cl 53 | s( 3.47%)p27.82( 96.40%)d 0.04( 0.13%)   |         |         |         |         |
|      |                        | 0.0000                                   | 0.0000  | 0.1860  | -0.0072 | -0.0010 |
|      |                        | 0.0001                                   | -0.0001 | 0.0000  | 0.0001  | -0.3590 |
|      |                        | -0.0029                                  | -0.0016 | -0.0002 | 0.0000  | -0.9051 |
|      |                        | 0.0033                                   | -0.0039 | -0.0002 | 0.0000  | -0.1261 |
|      |                        | -0.0009                                  | 0.0018  | -0.0001 | 0.0207  | 0.0120  |
|      |                        | 0.0270                                   | 0.0012  | -0.0049 |         |         |
| 167. | (0.89449) LP*( 1) C 16 | s( 0.00%)p 1.00( 99.97%)d 0.00( 0.03%)   |         |         |         |         |
|      |                        | 0.0000                                   | 0.0037  | -0.0007 | 0.0000  | -0.0001 |
|      |                        | 0.0000                                   | 0.6463  | 0.0275  | -0.0047 | 0.6904  |
|      |                        | 0.0264                                   | -0.0053 | 0.3217  | 0.0187  | -0.0034 |
|      |                        | -0.0053                                  | 0.0107  | 0.0088  | 0.0043  | 0.0094  |
| 168. | (0.00291) RY*( 1) C 1  | s( 20.48%)p 3.46( 70.86%)d 0.42( 8.67%)  |         |         |         |         |
|      |                        | 0.0000                                   | 0.0015  | 0.4502  | -0.0460 | -0.0005 |
|      |                        | -0.0011                                  | 0.0099  | 0.2778  | -0.0568 | 0.0107  |
|      |                        | -0.5272                                  | 0.0313  | 0.0114  | -0.5890 | 0.0438  |
|      |                        | -0.0134                                  | 0.0068  | 0.1896  | -0.1883 | 0.1225  |
| 169. | (0.00212) RY*( 2) C 1  | s( 0.14%)p99.99( 93.85%)d44.38( 6.02%)   |         |         |         |         |
|      |                        | 0.0000                                   | -0.0021 | 0.0365  | -0.0046 | -0.0009 |
|      |                        | 0.0003                                   | 0.0022  | 0.0230  | -0.0226 | -0.0109 |
|      |                        | 0.7278                                   | 0.1081  | 0.0108  | -0.6188 | -0.1137 |
|      |                        | -0.0431                                  | 0.0523  | -0.0210 | 0.1296  | 0.1958  |
| 170. | (0.00109) RY*( 3) C 1  | s( 5.09%)p18.42( 93.73%)d 0.23( 1.18%)   |         |         |         |         |
|      |                        | 0.0000                                   | 0.0001  | 0.2199  | -0.0497 | 0.0045  |
|      |                        | -0.0029                                  | -0.0320 | -0.9125 | 0.2634  | 0.0015  |
|      |                        | -0.1057                                  | 0.0637  | 0.0033  | -0.1343 | 0.0297  |
|      |                        | -0.0133                                  | 0.0126  | 0.0711  | -0.0362 | 0.0716  |
| 171. | (0.00059) RY*( 4) C 1  | s( 70.67%)p 0.35( 24.94%)d 0.06( 4.39%)  |         |         |         |         |
|      |                        | 0.0000                                   | -0.0062 | 0.8404  | -0.0176 | 0.0022  |
|      |                        | 0.0025                                   | -0.0001 | 0.0970  | 0.0166  | -0.0101 |
|      |                        | 0.2922                                   | -0.1043 | -0.0125 | 0.3650  | -0.1000 |
|      |                        | -0.0709                                  | -0.1267 | 0.0103  | 0.0759  | -0.1301 |
| 172. | (0.00034) RY*( 5) C 1  | s( 0.04%)p15.43( 0.65%)d99.99( 99.31%)   |         |         |         |         |
|      |                        | 0.0000                                   | 0.0005  | 0.0116  | 0.0165  | 0.0038  |
|      |                        | 0.0007                                   | 0.0006  | -0.0031 | -0.0519 | -0.0066 |
|      |                        | -0.0392                                  | -0.0109 | 0.0043  | 0.0442  | -0.0110 |
|      |                        | -0.7413                                  | 0.6577  | 0.0270  | 0.0468  | -0.0901 |
| 173. | (0.00012) RY*( 6) C 1  | s( 21.24%)p 2.57( 54.56%)d 1.14( 24.20%) |         |         |         |         |
|      |                        | 0.0000                                   | 0.0092  | 0.1489  | 0.4254  | 0.0799  |
|      |                        | -0.0527                                  | -0.0056 | -0.0629 | -0.2920 | -0.0072 |
|      |                        | -0.0492                                  | 0.4784  | -0.0067 | -0.0476 | 0.4719  |
|      |                        | 0.0757                                   | 0.0438  | -0.4081 | 0.1971  | -0.1703 |
| 174. | (0.00010) RY*( 7) C 1  | s( 0.82%)p65.49( 53.79%)d55.27( 45.39%)  |         |         |         |         |
| 175. | (0.00006) RY*( 8) C 1  | s( 3.57%)p11.96( 42.73%)d15.04( 53.70%)  |         |         |         |         |
| 176. | (0.00004) RY*( 9) C 1  | s( 13.71%)p 2.79( 38.30%)d 3.50( 47.99%) |         |         |         |         |
| 177. | (0.00001) RY*( 10) C 1 | s( 7.46%)p 2.36( 17.56%)d10.06( 74.98%)  |         |         |         |         |
| 178. | (0.00002) RY*( 11) C 1 | s( 1.57%)p59.39( 93.41%)d 3.19( 5.02%)   |         |         |         |         |
| 179. | (0.00001) RY*( 12) C 1 | s( 56.85%)p 0.05( 2.74%)d 0.71( 40.41%)  |         |         |         |         |
| 180. | (0.00001) RY*( 13) C 1 | s( 1.08%)p11.52( 12.48%)d79.77( 86.43%)  |         |         |         |         |
| 181. | (0.00000) RY*( 14) C 1 | s( 98.60%)p 0.01( 0.53%)d 0.01( 0.87%)   |         |         |         |         |
| 182. | (0.00000) RY*( 15) C 1 | s( 98.74%)p 0.00( 0.11%)d 0.01( 1.15%)   |         |         |         |         |
| 183. | (0.00601) RY*( 1) C 2  | s( 7.44%)p11.46( 85.20%)d 0.99( 7.36%)   |         |         |         |         |
|      |                        | 0.0000                                   | 0.0024  | 0.2720  | -0.0190 | 0.0016  |
|      |                        | -0.0023                                  | 0.0240  | -0.6080 | -0.1241 | -0.0089 |
|      |                        | -0.5615                                  | 0.0470  | -0.0146 | -0.3782 | 0.0747  |
|      |                        | 0.1737                                   | 0.1709  | -0.0446 | 0.0706  | -0.0853 |
| 184. | (0.00498) RY*( 2) C 2  | s( 1.58%)p58.25( 92.15%)d 3.96( 6.27%)   |         |         |         |         |
|      |                        | 0.0000                                   | -0.0026 | 0.1230  | -0.0263 | -0.0016 |
|      |                        | -0.0014                                  | 0.0036  | -0.1414 | -0.0202 | -0.0105 |
|      |                        | 0.6692                                   | 0.0959  | 0.0098  | -0.6604 | -0.0882 |
|      |                        | 0.0366                                   | 0.0358  | -0.0186 | 0.1356  | 0.2032  |
| 185. | (0.00230) RY*( 3) C 2  | s( 31.42%)p 2.18( 68.38%)d 0.01( 0.19%)  |         |         |         |         |
|      |                        | 0.0000                                   | -0.0108 | 0.5596  | -0.0306 | 0.0077  |
|      |                        | -0.0026                                  | -0.0143 | 0.6948  | -0.0898 | -0.0260 |
|      |                        | -0.2341                                  | 0.1499  | -0.0241 | -0.2894 | 0.1764  |
|      |                        | 0.0055                                   | -0.0219 | 0.0310  | -0.0014 | -0.0218 |
| 186. | (0.00127) RY*( 4) C 2  | s( 54.49%)p 0.70( 38.14%)d 0.14( 7.37%)  |         |         |         |         |
|      |                        | 0.0000                                   | -0.0014 | 0.7106  | -0.1998 | -0.0029 |
|      |                        | -0.0018                                  | -0.0157 | -0.2514 | 0.0661  | 0.0039  |
|      |                        | -0.3362                                  | -0.1054 | -0.0001 | 0.4317  | -0.0553 |
|      |                        | -0.0157                                  | 0.0540  | 0.0406  | -0.0857 | -0.2481 |
| 187. | (0.00058) RY*( 5) C 2  | s( 3.79%)p 3.17( 12.00%)d22.22( 84.21%)  |         |         |         |         |
|      |                        | 0.0000                                   | -0.0024 | 0.1876  | -0.0517 | -0.0042 |
|      |                        | 0.0013                                   | -0.0042 | -0.0245 | 0.1894  | -0.0040 |
|      |                        | -0.1259                                  | -0.0594 | 0.0071  | 0.2078  | -0.1446 |
|      |                        | 0.3416                                   | -0.3492 | -0.0814 | 0.4251  | 0.6450  |
| 188. | (0.00036) RY*( 6) C 2  | s( 5.27%)p10.63( 56.00%)d 7.35( 38.73%)  |         |         |         |         |
|      |                        | 0.0000                                   | 0.0088  | 0.0096  | 0.2281  | 0.0221  |
|      |                        | -0.0039                                  | 0.0020  | -0.0253 | -0.5813 | -0.0090 |
|      |                        | 0.1521                                   | 0.2254  | -0.0100 | 0.2558  | 0.2862  |
|      |                        | 0.3660                                   | 0.2866  | 0.0918  | -0.2221 | 0.3369  |
| 189. | (0.00015) RY*( 7) C 2  | s( 27.95%)p 0.24( 6.79%)d 2.33( 65.26%)  |         |         |         |         |
|      |                        | 0.0000                                   | 0.0008  | 0.1982  | 0.4901  | -0.0056 |
|      |                        | -0.0061                                  | -0.0232 | -0.1893 | -0.1393 | -0.0072 |
|      |                        | -0.0508                                  | -0.0646 | -0.0120 | -0.0184 | 0.0694  |
|      |                        | -0.6208                                  | -0.3807 | 0.1099  | -0.1821 | 0.2774  |
| 190. | (0.00012) RY*( 8) C 2  | s( 37.52%)p 1.14( 42.71%)d 0.53( 19.77%) |         |         |         |         |

|      |           |         |     |                  |                 |           |         |         |
|------|-----------|---------|-----|------------------|-----------------|-----------|---------|---------|
|      |           |         |     | 0.0000           | -0.0006         | 0.0539    | 0.6086  | 0.0209  |
|      |           |         |     | -0.0379          | 0.0026          | -0.0286   | 0.4622  | 0.0080  |
|      |           |         |     | 0.1051           | 0.2624          | 0.0090    | 0.0763  | 0.3560  |
|      |           |         |     | 0.1403           | 0.0907          | -0.2752   | 0.2230  | -0.2106 |
| 191. | (0.00009) | RY*( 9) | C 2 | s( 3.46%)p 5.83  | ( 20.19%)d22.04 | ( 76.35%) |         |         |
| 192. | (0.00009) | RY*(10) | C 2 | s( 6.54%)p 4.11  | ( 26.87%)d10.18 | ( 66.58%) |         |         |
| 193. | (0.00005) | RY*(11) | C 2 | s( 12.06%)p 5.85 | ( 70.55%)d 1.44 | ( 17.39%) |         |         |
| 194. | (0.00002) | RY*(12) | C 2 | s( 7.10%)p10.88  | ( 77.25%)d 2.20 | ( 15.65%) |         |         |
| 195. | (0.00002) | RY*(13) | C 2 | s( 2.60%)p 1.46  | ( 3.80%)d36.06  | ( 93.60%) |         |         |
| 196. | (0.00000) | RY*(14) | C 2 | s( 99.01%)p 0.00 | ( 0.11%)d 0.01  | ( 0.88%)  |         |         |
| 197. | (0.00000) | RY*(15) | C 2 | s( 99.74%)p 0.00 | ( 0.15%)d 0.00  | ( 0.10%)  |         |         |
| 198. | (0.00252) | RY*( 1) | C 3 | s( 13.86%)p 5.49 | ( 76.06%)d 0.73 | ( 10.09%) |         |         |
|      |           |         |     | 0.0000           | 0.0023          | 0.3676    | -0.0583 | -0.0002 |
|      |           |         |     | -0.0026          | -0.0200         | 0.7490    | -0.0529 | 0.0060  |
|      |           |         |     | -0.2850          | 0.0131          | 0.0067    | -0.3385 | 0.0189  |
|      |           |         |     | -0.1742          | -0.1952         | -0.0492   | 0.1513  | -0.0844 |
| 199. | (0.00153) | RY*( 2) | C 3 | s( 0.36%)p99.99  | ( 99.18%)d 1.26 | ( 0.45%)  |         |         |
|      |           |         |     | 0.0000           | -0.0012         | 0.0599    | 0.0042  | -0.0015 |
|      |           |         |     | 0.0006           | -0.0118         | -0.5131   | 0.0677  | -0.0188 |
|      |           |         |     | -0.6060          | 0.0821          | -0.0215   | -0.5824 | 0.0994  |
|      |           |         |     | 0.0214           | 0.0465          | -0.0174   | 0.0395  | 0.0086  |
| 200. | (0.00098) | RY*( 3) | C 3 | s( 0.01%)p 1.00  | ( 92.43%)d 0.08 | ( 7.56%)  |         |         |
|      |           |         |     | 0.0000           | 0.0003          | 0.0097    | -0.0007 | -0.0007 |
|      |           |         |     | -0.0012          | 0.0006          | 0.0411    | -0.0036 | 0.0074  |
|      |           |         |     | -0.6703          | -0.1364         | -0.0063   | 0.6649  | 0.1119  |
|      |           |         |     | -0.1896          | 0.1773          | 0.0154    | -0.0355 | -0.0820 |
| 201. | (0.00079) | RY*( 4) | C 3 | s( 85.03%)p 0.14 | ( 11.99%)d 0.04 | ( 2.98%)  |         |         |
|      |           |         |     | 0.0000           | -0.0047         | 0.9180    | -0.0866 | -0.0013 |
|      |           |         |     | 0.0054           | 0.0203          | -0.2544   | 0.0380  | -0.0038 |
|      |           |         |     | 0.1610           | 0.0135          | -0.0055   | 0.1650  | 0.0015  |
|      |           |         |     | 0.1049           | 0.1084          | 0.0784    | -0.0298 | 0.0020  |
| 202. | (0.00052) | RY*( 5) | C 3 | s( 0.01%)p50.06  | ( 0.72%)d99.99  | ( 99.26%) |         |         |
|      |           |         |     | 0.0000           | -0.0003         | 0.0108    | -0.0053 | -0.0010 |
|      |           |         |     | -0.0002          | 0.0001          | 0.0072    | -0.0441 | 0.0081  |
|      |           |         |     | 0.0481           | -0.0437         | -0.0068   | -0.0120 | -0.0279 |
|      |           |         |     | -0.3043          | 0.3280          | -0.0384   | 0.4725  | 0.7535  |
| 203. | (0.00010) | RY*( 6) | C 3 | s( 2.81%)p 2.21  | ( 6.23%)d32.32  | ( 90.96%) |         |         |
| 204. | (0.00005) | RY*( 7) | C 3 | s( 19.59%)p 1.74 | ( 34.06%)d 2.37 | ( 46.35%) |         |         |
| 205. | (0.00003) | RY*( 8) | C 3 | s( 1.55%)p54.73  | ( 84.61%)d 8.96 | ( 13.85%) |         |         |
| 206. | (0.00002) | RY*( 9) | C 3 | s( 1.64%)p10.33  | ( 16.93%)d49.67 | ( 81.43%) |         |         |
| 207. | (0.00001) | RY*(10) | C 3 | s( 65.68%)p 0.07 | ( 4.43%)d 0.46  | ( 29.89%) |         |         |
| 208. | (0.00001) | RY*(11) | C 3 | s( 9.16%)p 7.70  | ( 70.57%)d 2.21 | ( 20.27%) |         |         |
| 209. | (0.00002) | RY*(12) | C 3 | s( 2.99%)p 1.58  | ( 4.72%)d30.92  | ( 92.30%) |         |         |
| 210. | (0.00000) | RY*(13) | C 3 | s( 0.01%)p 1.00  | ( 97.98%)d 0.02 | ( 2.02%)  |         |         |
| 211. | (0.00000) | RY*(14) | C 3 | s( 99.56%)p 0.00 | ( 0.07%)d 0.00  | ( 0.37%)  |         |         |
| 212. | (0.00000) | RY*(15) | C 3 | s( 97.80%)p 0.00 | ( 0.26%)d 0.02  | ( 1.95%)  |         |         |
| 213. | (0.01427) | RY*( 1) | C 4 | s( 56.28%)p 0.78 | ( 43.62%)d 0.00 | ( 0.10%)  |         |         |
|      |           |         |     | 0.0000           | -0.0800         | 0.7457    | 0.0153  | 0.0055  |
|      |           |         |     | 0.0045           | 0.0130          | 0.0993    | -0.0124 | -0.0730 |
|      |           |         |     | -0.4715          | 0.0535          | 0.0726    | 0.4325  | -0.0572 |
|      |           |         |     | -0.0058          | 0.0023          | -0.0263   | -0.0089 | 0.0130  |
| 214. | (0.00422) | RY*( 2) | C 4 | s( 14.11%)p 5.37 | ( 75.76%)d 0.72 | ( 10.13%) |         |         |
|      |           |         |     | 0.0000           | -0.0022         | 0.3746    | -0.0281 | -0.0045 |
|      |           |         |     | 0.0024           | 0.0089          | -0.6921   | -0.1060 | -0.0356 |
|      |           |         |     | 0.5030           | 0.0042          | 0.0237    | 0.0604  | 0.0940  |
|      |           |         |     | -0.1494          | 0.1060          | -0.0363   | -0.1130 | -0.2316 |
| 215. | (0.00410) | RY*( 3) | C 4 | s( 25.38%)p 2.89 | ( 73.43%)d 0.05 | ( 1.19%)  |         |         |
|      |           |         |     | 0.0000           | 0.0033          | 0.5011    | -0.0520 | -0.0007 |
|      |           |         |     | 0.0035           | 0.0129          | 0.3796    | 0.0868  | -0.0460 |
|      |           |         |     | 0.2070           | -0.0947         | 0.0360    | -0.7261 | 0.0096  |
|      |           |         |     | -0.0013          | -0.0122         | -0.0673   | -0.0744 | -0.0413 |
| 216. | (0.00317) | RY*( 4) | C 4 | s( 0.46%)p99.99  | ( 51.31%)d99.99 | ( 48.23%) |         |         |
|      |           |         |     | 0.0000           | 0.0007          | 0.0266    | 0.0617  | -0.0088 |
|      |           |         |     | -0.0046          | 0.0135          | -0.4249   | -0.0560 | 0.0173  |
|      |           |         |     | -0.4075          | -0.0979         | 0.0116    | -0.3913 | -0.0077 |
|      |           |         |     | -0.2118          | 0.3294          | 0.0542    | 0.3657  | 0.4385  |
| 217. | (0.00198) | RY*( 5) | C 4 | s( 0.50%)p59.78  | ( 30.08%)d99.99 | ( 69.42%) |         |         |
|      |           |         |     | 0.0000           | -0.0030         | 0.0044    | 0.0700  | -0.0088 |
|      |           |         |     | -0.0044          | -0.0448         | -0.3776   | -0.0682 | -0.0075 |
|      |           |         |     | -0.2925          | -0.1017         | -0.0071   | -0.2303 | 0.0497  |
|      |           |         |     | 0.4914           | -0.6091         | -0.1763   | -0.2238 | 0.0210  |
| 218. | (0.00160) | RY*( 6) | C 4 | s( 2.44%)p11.13  | ( 27.11%)d28.91 | ( 70.45%) |         |         |
|      |           |         |     | 0.0000           | 0.0029          | 0.1557    | 0.0075  | -0.0065 |
|      |           |         |     | -0.0043          | -0.0112         | 0.0728    | 0.0070  | 0.0149  |
|      |           |         |     | 0.4564           | 0.0062          | 0.0447    | 0.2105  | 0.1038  |
|      |           |         |     | 0.3027           | -0.1725         | -0.0137   | 0.2991  | 0.7025  |
| 219. | (0.00022) | RY*( 7) | C 4 | s( 86.62%)p 0.13 | ( 11.03%)d 0.03 | ( 2.35%)  |         |         |
|      |           |         |     | 0.0000           | -0.0007         | 0.0199    | 0.9305  | -0.0041 |
|      |           |         |     | 0.0066           | 0.0041          | 0.0285    | 0.0016  | -0.0059 |
|      |           |         |     | 0.0856           | 0.2638          | 0.0075    | -0.0429 | -0.1750 |
|      |           |         |     | -0.0769          | -0.0511         | -0.0980   | 0.0591  | -0.0433 |
| 220. | (0.00013) | RY*( 8) | C 4 | s( 6.24%)p11.16  | ( 69.58%)d 3.88 | ( 24.19%) |         |         |
|      |           |         |     | 0.0000           | 0.0116          | 0.0275    | 0.2440  | 0.0439  |
|      |           |         |     | 0.0015           | 0.0003          | 0.0597    | 0.1315  | 0.0143  |
|      |           |         |     | -0.0456          | -0.4120         | -0.0167   | 0.0613  | 0.7063  |
|      |           |         |     | -0.2006          | -0.2204         | 0.3299    | 0.1616  | -0.1346 |
| 221. | (0.00010) | RY*( 9) | C 4 | s( 3.39%)p 3.55  | ( 12.03%)d24.98 | ( 84.58%) |         |         |
| 222. | (0.00008) | RY*(10) | C 4 | s( 0.56%)p12.53  | ( 7.07%)d99.99  | ( 92.37%) |         |         |
| 223. | (0.00005) | RY*(11) | C 4 | s( 2.25%)p19.12  | ( 43.02%)d24.32 | ( 54.73%) |         |         |
| 224. | (0.00003) | RY*(12) | C 4 | s( 2.93%)p23.99  | ( 70.39%)d 9.09 | ( 26.67%) |         |         |
| 225. | (0.00002) | RY*(13) | C 4 | s( 0.91%)p95.91  | ( 87.16%)d13.13 | ( 11.93%) |         |         |
| 226. | (0.00000) | RY*(14) | C 4 | s( 99.70%)p 0.00 | ( 0.08%)d 0.00  | ( 0.21%)  |         |         |
| 227. | (0.00000) | RY*(15) | C 4 | s( 96.96%)p 0.00 | ( 0.11%)d 0.03  | ( 2.93%)  |         |         |
| 228. | (0.00308) | RY*( 1) | C 5 | s( 14.74%)p 5.21 | ( 76.75%)d 0.58 | ( 8.51%)  |         |         |
|      |           |         |     | 0.0000           | 0.0040          | 0.3830    | -0.0256 | -0.0009 |
|      |           |         |     | -0.0024          | -0.0085         | 0.8553    | -0.0476 | -0.0087 |
|      |           |         |     | 0.1274           | 0.0129          | -0.0105   | 0.1268  | 0.0311  |
|      |           |         |     | 0.1808           | 0.1956          | -0.0219   | 0.0954  | -0.0675 |
| 229. | (0.00178) | RY*( 2) | C 5 | s( 0.00%)p 1.00  | ( 96.46%)d 0.04 | ( 3.53%)  |         |         |
|      |           |         |     | 0.0000           | 0.0001          | 0.0047    | 0.0006  | 0.0004  |
|      |           |         |     | -0.0007          | -0.0001         | 0.0102    | 0.0110  | 0.0069  |
|      |           |         |     | -0.7157          | -0.1127         | -0.0053   | 0.6552  | 0.1001  |
|      |           |         |     | -0.1269          | 0.1043          | 0.0025    | 0.0461  | 0.0789  |
| 230. | (0.00090) | RY*( 3) | C 5 | s( 27.48%)p 2.58 | ( 70.98%)d 0.06 | ( 1.54%)  |         |         |
|      |           |         |     | 0.0000           | 0.0066          | 0.5219    | -0.0479 | -0.0042 |
|      |           |         |     | 0.0042           | -0.0128         | -0.3986   | 0.1425  | 0.0151  |
|      |           |         |     | 0.4717           | -0.1272         | 0.0150    | 0.5209  | -0.1418 |
|      |           |         |     | 0.0361           | 0.0376          | 0.0020    | 0.0751  | -0.0838 |
| 231. | (0.00052) | RY*( 4) | C 5 | s( 54.09%)p 0.78 | ( 42.31%)d 0.07 | ( 3.60%)  |         |         |
|      |           |         |     | 0.0000           | -0.0031         | 0.7336    | 0.0511  | 0.0078  |
|      |           |         |     | 0.0031           | 0.0114          | -0.1595   | 0.0813  | 0.0072  |
|      |           |         |     | -0.3832          | 0.1757          | 0.0063    | -0.4251 | 0.1801  |
|      |           |         |     | -0.1346          | -0.1067         | 0.0718    | 0.0004  | -0.0364 |
| 232. | (0.00037) | RY*( 5) | C 5 | s( 0.31%)p 3.02  | ( 0.92%)d99.99  | ( 98.77%) |         |         |
|      |           |         |     | 0.0000           | -0.0011         | 0.0551    | 0.0045  | 0.0018  |
|      |           |         |     | 0.0009           | 0.0003          | -0.0171   | 0.0252  | -0.0065 |

|      |           |         |     |                                          |         |         |         |         |
|------|-----------|---------|-----|------------------------------------------|---------|---------|---------|---------|
|      |           |         |     | 0.0052                                   | -0.0807 | 0.0063  | -0.0387 | 0.0137  |
|      |           |         |     | 0.3073                                   | -0.2460 | -0.0647 | 0.4599  | 0.7855  |
| 233. | (0.00015) | RY*( 6) | C 5 | s( 24.52%)p 1.38( 33.87%)d 1.70( 41.61%) |         |         |         |         |
|      |           |         |     | 0.0000                                   | 0.0064  | 0.1249  | 0.4744  | -0.0339 |
|      |           |         |     | 0.0573                                   | 0.0030  | 0.0378  | -0.5459 | 0.0139  |
|      |           |         |     | 0.1328                                   | 0.0174  | 0.0148  | 0.1375  | 0.0449  |
|      |           |         |     | -0.1543                                  | -0.1501 | 0.1114  | -0.4993 | 0.3287  |
| 234. | (0.00011) | RY*( 7) | C 5 | s( 5.32%)p 6.41( 34.08%)d11.40( 60.60%)  |         |         |         |         |
|      |           |         |     | 0.0000                                   | 0.0010  | 0.0431  | 0.2227  | -0.0400 |
|      |           |         |     | -0.0102                                  | 0.0150  | 0.0549  | -0.3492 | -0.0161 |
|      |           |         |     | -0.0533                                  | -0.3278 | -0.0172 | -0.0690 | -0.3163 |
|      |           |         |     | -0.3110                                  | -0.3037 | -0.3578 | 0.4523  | -0.2907 |
| 235. | (0.00008) | RY*( 8) | C 5 | s( 7.58%)p 8.97( 68.01%)d 3.22( 24.41%)  |         |         |         |         |
| 236. | (0.00006) | RY*( 9) | C 5 | s( 0.21%)p27.23( 5.84%)d99.99( 93.95%)   |         |         |         |         |
| 237. | (0.00002) | RY*(10) | C 5 | s( 2.32%)p 2.88( 6.66%)d39.30( 91.02%)   |         |         |         |         |
| 238. | (0.00002) | RY*(11) | C 5 | s( 8.44%)p 2.85( 24.01%)d 8.00( 67.55%)  |         |         |         |         |
| 239. | (0.00002) | RY*(12) | C 5 | s( 56.65%)p 0.74( 42.15%)d 0.02( 1.20%)  |         |         |         |         |
| 240. | (0.00000) | RY*(13) | C 5 | s( 0.15%)p99.99( 97.79%)d13.31( 2.05%)   |         |         |         |         |
| 241. | (0.00000) | RY*(14) | C 5 | s( 99.49%)p 0.00( 0.25%)d 0.00( 0.26%)   |         |         |         |         |
| 242. | (0.00000) | RY*(15) | C 5 | s( 98.75%)p 0.00( 0.14%)d 0.01( 1.11%)   |         |         |         |         |
| 243. | (0.01383) | RY*( 1) | C 6 | s( 38.95%)p 1.56( 60.84%)d 0.01( 0.21%)  |         |         |         |         |
|      |           |         |     | 0.0000                                   | -0.0744 | 0.6183  | 0.0400  | 0.0062  |
|      |           |         |     | 0.0039                                   | -0.0704 | -0.5711 | 0.0845  | 0.0444  |
|      |           |         |     | 0.3971                                   | -0.0598 | 0.0360  | 0.3233  | -0.0316 |
|      |           |         |     | 0.0052                                   | -0.0307 | 0.0042  | 0.0325  | 0.0055  |
| 244. | (0.00533) | RY*( 2) | C 6 | s( 0.68%)p99.99( 96.04%)d 4.81( 3.28%)   |         |         |         |         |
|      |           |         |     | 0.0000                                   | 0.0039  | 0.0824  | 0.0036  | 0.0007  |
|      |           |         |     | 0.0010                                   | -0.0023 | 0.6944  | 0.0741  | 0.0150  |
|      |           |         |     | 0.5106                                   | 0.1005  | 0.0102  | 0.4450  | 0.0590  |
|      |           |         |     | -0.0218                                  | 0.0818  | -0.0863 | 0.0936  | -0.0971 |
| 245. | (0.00381) | RY*( 3) | C 6 | s( 44.26%)p 0.74( 32.93%)d 0.52( 22.81%) |         |         |         |         |
|      |           |         |     | 0.0000                                   | -0.0117 | 0.6617  | -0.0662 | 0.0067  |
|      |           |         |     | 0.0113                                   | -0.0623 | 0.3244  | 0.0293  | 0.0626  |
|      |           |         |     | -0.4474                                  | -0.0143 | 0.0238  | -0.1201 | -0.0054 |
|      |           |         |     | -0.2938                                  | 0.1783  | 0.0616  | -0.2978 | -0.1321 |
| 246. | (0.00295) | RY*( 4) | C 6 | s( 6.72%)p 9.43( 63.37%)d 4.45( 29.90%)  |         |         |         |         |
|      |           |         |     | 0.0000                                   | -0.0021 | 0.2574  | 0.0311  | -0.0002 |
|      |           |         |     | 0.0024                                   | -0.0173 | 0.2091  | -0.0201 | 0.0068  |
|      |           |         |     | 0.3969                                   | 0.0666  | 0.0324  | -0.6519 | -0.0359 |
|      |           |         |     | 0.1582                                   | -0.3646 | 0.1773  | -0.0214 | 0.3305  |
| 247. | (0.00172) | RY*( 5) | C 6 | s( 3.10%)p12.93( 40.08%)d18.33( 56.82%)  |         |         |         |         |
|      |           |         |     | 0.0000                                   | 0.0007  | 0.1760  | -0.0020 | -0.0039 |
|      |           |         |     | -0.0003                                  | -0.0177 | 0.1416  | -0.0733 | -0.0133 |
|      |           |         |     | -0.4406                                  | -0.0235 | 0.0405  | 0.3933  | 0.1545  |
|      |           |         |     | 0.3488                                   | -0.5016 | 0.0519  | 0.2513  | 0.3591  |
| 248. | (0.00149) | RY*( 6) | C 6 | s( 4.90%)p 2.36( 11.58%)d17.06( 83.52%)  |         |         |         |         |
|      |           |         |     | 0.0000                                   | -0.0020 | 0.2180  | 0.0375  | -0.0040 |
|      |           |         |     | -0.0018                                  | -0.0462 | 0.0205  | -0.1132 | -0.0171 |
|      |           |         |     | -0.0826                                  | 0.0464  | -0.0160 | -0.2952 | 0.0613  |
|      |           |         |     | 0.1969                                   | 0.1628  | -0.3616 | 0.7170  | -0.3536 |
| 249. | (0.00025) | RY*( 7) | C 6 | s( 83.48%)p 0.11( 8.87%)d 0.09( 7.65%)   |         |         |         |         |
|      |           |         |     | 0.0000                                   | 0.0011  | 0.0098  | 0.9134  | -0.0194 |
|      |           |         |     | -0.0059                                  | 0.0076  | 0.0147  | -0.2635 | -0.0014 |
|      |           |         |     | -0.0331                                  | 0.1110  | -0.0025 | 0.0373  | 0.0647  |
|      |           |         |     | -0.0482                                  | 0.0577  | 0.2566  | 0.0008  | -0.0711 |
| 250. | (0.00010) | RY*( 8) | C 6 | s( 13.83%)p 2.88( 39.79%)d 3.35( 46.38%) |         |         |         |         |
|      |           |         |     | 0.0000                                   | 0.0100  | 0.0144  | 0.3622  | 0.0746  |
|      |           |         |     | 0.0351                                   | -0.0067 | 0.0458  | 0.5964  | 0.0046  |
|      |           |         |     | -0.0741                                  | -0.1577 | 0.0027  | -0.0619 | -0.0762 |
|      |           |         |     | 0.3243                                   | 0.1382  | -0.4999 | -0.2201 | 0.2028  |
| 251. | (0.00008) | RY*( 9) | C 6 | s( 2.10%)p26.16( 54.90%)d20.49( 43.00%)  |         |         |         |         |
| 252. | (0.00009) | RY*(10) | C 6 | s( 1.97%)p 8.44( 16.58%)d41.45( 81.45%)  |         |         |         |         |
| 253. | (0.00006) | RY*(11) | C 6 | s( 0.35%)p12.51( 4.37%)d99.99( 95.28%)   |         |         |         |         |
| 254. | (0.00003) | RY*(12) | C 6 | s( 0.22%)p99.99( 95.45%)d19.59( 4.33%)   |         |         |         |         |
| 255. | (0.00004) | RY*(13) | C 6 | s( 0.89%)p86.43( 76.89%)d24.98( 22.22%)  |         |         |         |         |
| 256. | (0.00000) | RY*(14) | C 6 | s( 99.64%)p 0.00( 0.10%)d 0.00( 0.26%)   |         |         |         |         |
| 257. | (0.00000) | RY*(15) | C 6 | s( 97.48%)p 0.00( 0.17%)d 0.02( 2.36%)   |         |         |         |         |
| 258. | (0.00833) | RY*( 1) | C 7 | s( 6.28%)p14.08( 88.44%)d 0.84( 5.27%)   |         |         |         |         |
|      |           |         |     | 0.0000                                   | -0.0019 | 0.2506  | -0.0004 | -0.0035 |
|      |           |         |     | 0.0006                                   | 0.0169  | -0.2179 | -0.0876 | -0.0140 |
|      |           |         |     | -0.5877                                  | 0.0293  | -0.0105 | -0.6935 | 0.0394  |
|      |           |         |     | -0.0415                                  | -0.0086 | 0.1208  | -0.1594 | 0.1046  |
| 259. | (0.00512) | RY*( 2) | C 7 | s( 0.03%)p99.99( 90.74%)d99.99( 9.24%)   |         |         |         |         |
|      |           |         |     | 0.0000                                   | -0.0012 | 0.0138  | -0.0083 | 0.0003  |
|      |           |         |     | -0.0001                                  | -0.0007 | 0.0527  | 0.0106  | 0.0322  |
|      |           |         |     | -0.7261                                  | 0.0950  | -0.0332 | 0.5996  | -0.0812 |
|      |           |         |     | 0.2016                                   | -0.1890 | 0.0073  | -0.0877 | -0.0910 |
| 260. | (0.00343) | RY*( 3) | C 7 | s( 1.95%)p48.68( 94.94%)d 1.59( 3.11%)   |         |         |         |         |
|      |           |         |     | 0.0000                                   | -0.0056 | 0.1141  | 0.0803  | -0.0009 |
|      |           |         |     | -0.0019                                  | -0.0034 | -0.9081 | -0.2265 | 0.0152  |
|      |           |         |     | 0.1309                                   | -0.0197 | 0.0143  | 0.2339  | -0.0297 |
|      |           |         |     | -0.1029                                  | -0.1345 | -0.0379 | 0.0260  | -0.0161 |
| 261. | (0.00110) | RY*( 4) | C 7 | s( 74.53%)p 0.18( 13.38%)d 0.16( 12.09%) |         |         |         |         |
|      |           |         |     | 0.0000                                   | -0.0012 | 0.8627  | 0.0323  | -0.0027 |
|      |           |         |     | -0.0034                                  | 0.0152  | 0.1684  | -0.1924 | 0.0182  |
|      |           |         |     | 0.1957                                   | 0.0516  | 0.0106  | 0.1365  | 0.0903  |
|      |           |         |     | 0.2133                                   | 0.1410  | 0.1022  | -0.1417 | -0.1582 |
| 262. | (0.00101) | RY*( 5) | C 7 | s( 4.97%)p 0.91( 4.50%)d18.23( 90.54%)   |         |         |         |         |
|      |           |         |     | 0.0000                                   | -0.0012 | 0.2218  | -0.0211 | -0.0007 |
|      |           |         |     | -0.0028                                  | 0.0029  | 0.0363  | 0.0164  | -0.0074 |
|      |           |         |     | -0.1133                                  | 0.0172  | 0.0156  | 0.1724  | -0.0146 |
|      |           |         |     | -0.1807                                  | 0.2354  | 0.0035  | 0.4920  | 0.7584  |
| 263. | (0.00055) | RY*( 6) | C 7 | s( 0.05%)p99.99( 5.10%)d99.99( 94.85%)   |         |         |         |         |
|      |           |         |     | 0.0000                                   | 0.0006  | 0.0069  | 0.0210  | -0.0014 |
|      |           |         |     | 0.0010                                   | 0.0000  | -0.0079 | 0.0326  | 0.0009  |
|      |           |         |     | 0.1658                                   | 0.0045  | -0.0013 | -0.1460 | 0.0323  |
|      |           |         |     | 0.6700                                   | -0.6082 | -0.0401 | 0.0912  | 0.3462  |
| 264. | (0.00053) | RY*( 7) | C 7 | s( 17.50%)p 2.55( 44.61%)d 2.16( 37.88%) |         |         |         |         |
|      |           |         |     | 0.0000                                   | -0.0081 | 0.3312  | -0.2549 | -0.0157 |
|      |           |         |     | 0.0069                                   | -0.0090 | -0.0506 | 0.6266  | 0.0091  |
|      |           |         |     | -0.0195                                  | -0.1251 | 0.0083  | -0.0619 | -0.1757 |
|      |           |         |     | -0.2421                                  | -0.3391 | -0.0979 | 0.3432  | -0.2792 |
| 265. | (0.00019) | RY*( 8) | C 7 | s( 69.36%)p 0.13( 9.04%)d 0.31( 21.60%)  |         |         |         |         |
|      |           |         |     | 0.0000                                   | 0.0038  | 0.0952  | 0.8273  | -0.0070 |
|      |           |         |     | -0.0006                                  | -0.0097 | 0.0905  | 0.2621  | -0.0056 |
|      |           |         |     | 0.0264                                   | 0.0953  | -0.0059 | 0.0334  | 0.0496  |
|      |           |         |     | -0.2920                                  | -0.2304 | -0.0915 | -0.2283 | 0.1309  |
| 266. | (0.00019) | RY*( 9) | C 7 | s( 7.89%)p11.19( 88.29%)d 0.48( 3.82%)   |         |         |         |         |
|      |           |         |     | 0.0000                                   | -0.0007 | 0.0217  | 0.2788  | 0.0087  |
|      |           |         |     | 0.0244                                   | 0.0058  | 0.0762  | -0.2187 | 0.0006  |
|      |           |         |     | -0.0558                                  | -0.6667 | 0.0000  | -0.0537 | -0.6154 |
|      |           |         |     | 0.1180                                   | 0.0711  | -0.0224 | 0.1217  | -0.0631 |
| 267. | (0.00012) | RY*(10) | C 7 | s( 2.02%)p20.95( 42.37%)d27.50( 55.61%)  |         |         |         |         |
|      |           |         |     | 0.0000                                   | -0.0003 | 0.0017  | 0.1396  | 0.0227  |
|      |           |         |     | 0.0150                                   | -0.0088 | 0.1964  | -0.5388 | 0.0062  |
|      |           |         |     | -0.0944                                  | 0.1006  | 0.0064  | -0.0904 | 0.2597  |



|      |           |         |   |    |                                                                                                                                                                                                                                                |
|------|-----------|---------|---|----|------------------------------------------------------------------------------------------------------------------------------------------------------------------------------------------------------------------------------------------------|
| 268. | (0.00010) | RY*(11) | C | 7  | -0.1940 -0.2936 -0.2683 0.5295 -0.2825                                                                                                                                                                                                         |
| 269. | (0.00003) | RY*(12) | C | 7  | s( 8.86%)p 1.95( 17.30%)d 8.34( 73.84%)                                                                                                                                                                                                        |
| 270. | (0.00002) | RY*(13) | C | 7  | s( 0.75%)p99.99( 98.77%)d 0.64( 0.48%)                                                                                                                                                                                                         |
| 271. | (0.00000) | RY*(14) | C | 7  | s( 8.27%)p 0.23( 1.92%)d10.86( 89.81%)                                                                                                                                                                                                         |
| 272. | (0.00000) | RY*(15) | C | 7  | s( 97.77%)p 0.01( 0.65%)d 0.02( 1.58%)                                                                                                                                                                                                         |
| 273. | (0.01434) | RY*( 1) | C | 8  | s( 99.77%)p 0.00( 0.21%)d 0.00( 0.02%)<br>s( 57.19%)p 0.75( 42.71%)d 0.00( 0.10%)<br>0.0000 -0.0805 0.7517 0.0154 0.0051<br>0.0045 0.0583 0.3377 -0.0462 0.0740<br>0.4645 -0.0531 0.0464 0.2826 -0.0374<br>0.0231 0.0127 0.0173 0.0005 -0.0069 |
| 274. | (0.00419) | RY*( 2) | C | 8  | s( 38.50%)p 1.43( 55.17%)d 0.16( 6.32%)<br>0.0000 0.0016 0.6179 -0.0570 -0.0042<br>0.0042 0.0314 -0.3834 0.0611 0.0572<br>-0.4829 0.0708 0.0328 -0.3959 0.0273<br>0.0331 -0.0412 0.1153 -0.2168 -0.0126                                        |
| 275. | (0.00407) | RY*( 3) | C | 8  | s( 0.19%)p99.99( 94.82%)d26.79( 4.99%)<br>0.0000 0.0029 0.0403 -0.0147 0.0034<br>0.0007 0.0041 -0.8131 -0.1232 0.0036<br>0.2606 0.0632 0.0017 0.4367 0.0960<br>0.0841 0.0096 -0.1120 0.1363 -0.1079                                            |
| 276. | (0.00310) | RY*( 4) | C | 8  | s( 0.40%)p99.99( 46.61%)d99.99( 52.99%)<br>0.0000 0.0010 0.0241 0.0575 -0.0083<br>-0.0046 0.0040 -0.1721 0.0086 -0.0184<br>0.4029 0.0993 0.0190 -0.5115 -0.0442<br>-0.1704 0.3698 0.1688 0.3908 0.4277                                         |
| 277. | (0.00188) | RY*( 5) | C | 8  | s( 0.50%)p68.67( 34.62%)d99.99( 64.87%)<br>0.0000 -0.0027 -0.0044 0.0700 -0.0092<br>-0.0049 0.0150 0.0072 0.0978 0.0052<br>0.3015 0.0950 -0.0431 -0.4810 -0.0570<br>0.3737 -0.2289 -0.3441 0.1616 -0.5587                                      |
| 278. | (0.00166) | RY*( 6) | C | 8  | s( 2.34%)p11.68( 27.28%)d30.13( 70.39%)<br>0.0000 0.0029 0.1525 0.0058 -0.0056<br>-0.0041 0.0439 0.1373 0.0683 -0.0150<br>-0.4582 -0.0143 0.0114 0.1833 0.0568<br>0.1327 0.2773 -0.2625 0.7334 -0.0507                                         |
| 279. | (0.00022) | RY*( 7) | C | 8  | s( 87.14%)p 0.12( 10.46%)d 0.03( 2.40%)<br>0.0000 -0.0004 0.0195 0.9333 -0.0041<br>0.0061 0.0045 -0.0501 -0.1778 0.0057<br>-0.0818 -0.2446 0.0066 -0.0012 -0.0618<br>-0.0236 -0.0430 0.1296 0.0259 -0.0641                                     |
| 280. | (0.00013) | RY*( 8) | C | 8  | s( 5.55%)p13.06( 72.48%)d 3.96( 21.97%)<br>0.0000 0.0112 0.0312 0.2303 0.0369<br>-0.0001 -0.0141 0.0193 0.6203 -0.0145<br>0.0408 0.4101 -0.0074 0.0967 0.4000<br>-0.3221 -0.3227 0.0223 0.1003 0.0366                                          |
| 281. | (0.00009) | RY*( 9) | C | 8  | s( 3.01%)p 5.03( 15.15%)d27.20( 81.85%)                                                                                                                                                                                                        |
| 282. | (0.00009) | RY*(10) | C | 8  | s( 0.92%)p 0.63( 0.58%)d99.99( 98.50%)                                                                                                                                                                                                         |
| 283. | (0.00005) | RY*(11) | C | 8  | s( 3.17%)p12.01( 38.11%)d18.51( 58.72%)                                                                                                                                                                                                        |
| 284. | (0.00003) | RY*(12) | C | 8  | s( 2.24%)p35.56( 79.82%)d 7.99( 17.94%)                                                                                                                                                                                                        |
| 285. | (0.00003) | RY*(13) | C | 8  | s( 0.83%)p99.99( 83.80%)d18.42( 15.37%)                                                                                                                                                                                                        |
| 286. | (0.00000) | RY*(14) | C | 8  | s( 99.72%)p 0.00( 0.08%)d 0.00( 0.20%)                                                                                                                                                                                                         |
| 287. | (0.00000) | RY*(15) | C | 8  | s( 97.01%)p 0.00( 0.13%)d 0.03( 2.86%)                                                                                                                                                                                                         |
| 288. | (0.00790) | RY*( 1) | C | 9  | s( 6.45%)p13.92( 89.80%)d 0.58( 3.75%)<br>0.0000 0.0020 0.2537 -0.0119 -0.0008<br>0.0009 -0.0006 -0.2855 -0.0425 0.0136<br>0.6676 -0.0270 0.0143 0.6062 -0.0220<br>-0.0435 -0.0427 0.1050 -0.1285 0.0792                                       |
| 289. | (0.00432) | RY*( 2) | C | 9  | s( 0.01%)p 1.00( 98.33%)d 0.02( 1.66%)<br>0.0000 -0.0007 0.0062 -0.0044 -0.0001<br>-0.0003 -0.0013 -0.0616 0.0122 0.0063<br>-0.6753 0.0812 -0.0064 0.7153 -0.0709<br>0.0947 -0.0811 0.0036 -0.0138 -0.0297                                     |
| 290. | (0.00276) | RY*( 3) | C | 9  | s( 2.08%)p45.58( 94.65%)d 1.58( 3.28%)<br>0.0000 0.0019 0.1328 0.0558 -0.0024<br>-0.0016 -0.0054 -0.8861 -0.2328 -0.0095<br>-0.1971 -0.0150 -0.0056 -0.2604 -0.0042<br>0.1262 0.1275 0.0088 -0.0215 0.0058                                     |
| 291. | (0.00105) | RY*( 4) | C | 9  | s( 90.07%)p 0.10( 8.63%)d 0.01( 1.31%)<br>0.0000 -0.0040 0.9488 0.0222 -0.0012<br>0.0017 0.0003 0.1851 0.1040 -0.0103<br>-0.1398 -0.0506 -0.0119 -0.1309 -0.0414<br>0.0279 -0.0250 0.0301 0.0950 -0.0417                                       |
| 292. | (0.00052) | RY*( 5) | C | 9  | s( 0.27%)p27.62( 7.35%)d99.99( 92.38%)<br>0.0000 0.0014 0.0262 0.0443 0.0022<br>-0.0025 0.0003 0.0311 -0.1329 0.0091<br>-0.1104 -0.1487 -0.0060 0.0763 -0.1211<br>-0.6736 0.5629 0.0024 0.1310 0.3690                                          |
| 293. | (0.00050) | RY*( 6) | C | 9  | s( 2.47%)p25.55( 63.01%)d14.00( 34.52%)<br>0.0000 0.0074 -0.0009 0.1562 -0.0012<br>-0.0139 0.0050 0.1140 -0.5765 0.0073<br>-0.0559 -0.3773 0.0097 -0.0664 -0.3671<br>-0.1351 -0.5165 0.0501 -0.2156 0.1059                                     |
| 294. | (0.00043) | RY*( 7) | C | 9  | s( 0.09%)p15.16( 1.37%)d99.99( 98.54%)<br>0.0000 0.0005 0.0213 0.0209 -0.0030<br>-0.0018 0.0011 0.0108 -0.0309 -0.0010<br>-0.0267 -0.1054 0.0020 0.0142 0.0242<br>-0.3049 0.2210 0.0118 -0.4727 -0.7874                                        |
| 295. | (0.00021) | RY*( 8) | C | 9  | s( 5.71%)p14.97( 85.41%)d 1.56( 8.88%)<br>0.0000 -0.0010 -0.0801 0.2249 -0.0061<br>-0.0037 -0.0028 -0.1171 0.6661 0.0029<br>-0.0177 -0.3963 0.0046 -0.0481 -0.4868<br>0.1080 0.0439 0.0264 -0.2405 0.1292                                      |
| 296. | (0.00014) | RY*( 9) | C | 9  | s( 77.77%)p 0.19( 15.12%)d 0.09( 7.11%)<br>0.0000 0.0063 0.0274 0.8814 0.0048<br>-0.0002 -0.0012 0.0299 0.0145 0.0028<br>0.0081 0.3061 0.0027 0.0098 0.2371<br>-0.0732 -0.0500 -0.1727 -0.1559 0.0955                                          |
| 297. | (0.00012) | RY*(10) | C | 9  | s( 5.85%)p 4.88( 28.52%)d11.22( 65.63%)<br>0.0000 -0.0001 -0.0239 0.2397 0.0145<br>0.0157 -0.0155 0.2063 -0.3413 -0.0067<br>0.0887 -0.3049 -0.0077 0.1138 -0.1098<br>0.5802 0.5229 -0.0671 0.1654 -0.1199                                      |
| 298. | (0.00008) | RY*(11) | C | 9  | s( 1.92%)p 5.97( 11.44%)d45.23( 86.65%)                                                                                                                                                                                                        |
| 299. | (0.00004) | RY*(12) | C | 9  | s( 2.04%)p35.23( 71.70%)d12.90( 26.26%)                                                                                                                                                                                                        |
| 300. | (0.00002) | RY*(13) | C | 9  | s( 6.49%)p 3.79( 24.58%)d10.62( 68.93%)                                                                                                                                                                                                        |
| 301. | (0.00000) | RY*(14) | C | 9  | s( 99.06%)p 0.00( 0.19%)d 0.01( 0.75%)                                                                                                                                                                                                         |
| 302. | (0.00000) | RY*(15) | C | 9  | s( 99.81%)p 0.00( 0.05%)d 0.00( 0.14%)                                                                                                                                                                                                         |
| 303. | (0.01427) | RY*( 1) | C | 10 | s( 40.92%)p 1.44( 58.88%)d 0.00( 0.20%)<br>0.0000 -0.0758 0.6340 0.0394 0.0066<br>0.0041 0.0660 -0.5569 -0.0663 -0.0471<br>0.3682 0.0549 -0.0499 0.3505 0.0610<br>-0.0024 -0.0262 -0.0080 0.0352 -0.0035                                       |
| 304. | (0.00540) | RY*( 2) | C | 10 | s( 2.79%)p34.00( 95.01%)d 0.79( 2.20%)<br>0.0000 0.0031 0.1671 -0.0036 0.0011<br>0.0021 0.0208 -0.0165 0.0189 -0.0212                                                                                                                          |

|      |           |         |      |                                                                                                                                                                                                                                                                                             |
|------|-----------|---------|------|---------------------------------------------------------------------------------------------------------------------------------------------------------------------------------------------------------------------------------------------------------------------------------------------|
| 305. | (0.00407) | RY*( 3) | C 10 | 0.4810 -0.0974 -0.0005 -0.8361 0.0927<br>0.0521 -0.0585 0.0461 -0.0276 0.1139<br>s( 46.40%)p 0.86( 39.97%)d 0.29( 13.63%)<br>0.0000 -0.0115 0.6775 -0.0691 0.0063<br>0.0108 0.0567 0.3240 -0.0133 -0.0561<br>-0.5049 0.0164 -0.0458 -0.1754 0.0120<br>-0.1928 0.1036 0.1660 -0.2259 -0.0990 |
| 306. | (0.00283) | RY*( 4) | C 10 | s( 3.77%)p13.77( 51.97%)d11.73( 44.25%)<br>0.0000 -0.0019 0.1912 0.0344 -0.0008<br>0.0017 0.0353 0.5928 -0.0011 0.0032<br>0.3718 -0.0555 0.0056 0.1560 -0.0375<br>-0.0398 0.0294 -0.2915 0.4609 -0.3778                                                                                     |
| 307. | (0.00203) | RY*( 5) | C 10 | s( 0.60%)p77.00( 46.36%)d88.10( 53.04%)<br>0.0000 0.0036 0.0710 -0.0310 -0.0017<br>-0.0005 0.0333 -0.3741 0.1503 0.0209<br>-0.4642 0.0277 0.0078 -0.2882 0.0124<br>0.1597 -0.1383 -0.3442 0.5743 -0.1935                                                                                    |
| 308. | (0.00151) | RY*( 6) | C 10 | s( 4.21%)p 2.87( 12.09%)d19.90( 83.71%)<br>0.0000 -0.0024 0.2009 0.0408 -0.0036<br>-0.0017 0.0057 0.2800 0.0963 0.0197<br>-0.0635 -0.0473 -0.0477 0.1386 -0.0709<br>0.4301 -0.4461 -0.0485 0.1225 0.6601                                                                                    |
| 309. | (0.00026) | RY*( 7) | C 10 | s( 82.15%)p 0.14( 11.13%)d 0.08( 6.71%)<br>0.0000 0.0002 0.0142 0.9060 -0.0206<br>-0.0059 -0.0043 -0.0304 0.2528 0.0017<br>-0.0427 -0.1161 0.0057 -0.0335 -0.1733<br>-0.2541 -0.0366 0.0024 -0.0059 0.0341                                                                                  |
| 310. | (0.00011) | RY*( 8) | C 10 | s( 15.32%)p 4.07( 62.35%)d 1.46( 22.33%)<br>0.0000 0.0065 -0.0045 0.3868 0.0500<br>0.0327 0.0102 0.0724 -0.5134 -0.0048<br>-0.0926 0.1959 -0.0062 -0.0284 0.5538<br>0.3703 0.2656 -0.1221 -0.0119 0.0237                                                                                    |
| 311. | (0.00009) | RY*( 9) | C 10 | s( 2.83%)p 8.63( 24.47%)d25.64( 72.69%)                                                                                                                                                                                                                                                     |
| 312. | (0.00009) | RY*(10) | C 10 | s( 0.24%)p72.28( 17.07%)d99.99( 82.69%)                                                                                                                                                                                                                                                     |
| 313. | (0.00007) | RY*(11) | C 10 | s( 0.79%)p 2.22( 1.76%)d99.99( 97.45%)                                                                                                                                                                                                                                                      |
| 314. | (0.00004) | RY*(12) | C 10 | s( 0.91%)p91.52( 83.42%)d17.19( 15.67%)                                                                                                                                                                                                                                                     |
| 315. | (0.00003) | RY*(13) | C 10 | s( 0.42%)p99.99( 97.32%)d 5.39( 2.26%)                                                                                                                                                                                                                                                      |
| 316. | (0.00000) | RY*(14) | C 10 | s( 99.63%)p 0.00( 0.11%)d 0.00( 0.26%)                                                                                                                                                                                                                                                      |
| 317. | (0.00000) | RY*(15) | C 10 | s( 97.50%)p 0.00( 0.12%)d 0.02( 2.37%)                                                                                                                                                                                                                                                      |
| 318. | (0.00834) | RY*( 1) | C 11 | s( 0.92%)p99.99( 97.38%)d 1.85( 1.70%)<br>0.0000 -0.0278 0.0813 -0.0420 -0.0078<br>-0.0016 0.0234 0.8224 -0.0040 0.0365<br>0.0547 0.0099 0.0070 0.5406 -0.0068<br>0.0903 0.0928 0.0068 0.0095 -0.0109                                                                                       |
| 319. | (0.00744) | RY*( 2) | C 11 | s( 0.70%)p99.99( 98.77%)d 0.77( 0.54%)<br>0.0000 0.0164 0.0817 0.0041 -0.0031<br>-0.0015 -0.0203 -0.2454 0.0100 0.0109<br>-0.8446 0.0149 -0.0369 0.4595 -0.0273<br>-0.0246 -0.0459 0.0020 -0.0342 -0.0386                                                                                   |
| 320. | (0.00588) | RY*( 3) | C 11 | s( 4.70%)p20.01( 94.11%)d 0.25( 1.19%)<br>0.0000 0.0138 0.2149 0.0250 -0.0031<br>0.0000 -0.0340 0.4712 -0.0079 -0.0055<br>-0.4885 -0.0390 0.0073 -0.6905 -0.0267<br>-0.0131 -0.0042 0.0559 -0.0847 0.0379                                                                                   |
| 321. | (0.00249) | RY*( 4) | C 11 | s( 87.87%)p 0.10( 8.84%)d 0.04( 3.29%)<br>0.0000 -0.0150 0.9370 0.0178 -0.0128<br>-0.0056 -0.0131 -0.1617 -0.1486 -0.0392<br>0.1771 0.0229 -0.0264 0.0700 0.0318<br>0.1213 -0.0013 0.0737 -0.1027 -0.0466                                                                                   |
| 322. | (0.00050) | RY*( 5) | C 11 | s( 2.27%)p 1.61( 3.66%)d41.44( 94.07%)<br>0.0000 -0.0005 0.0715 0.1322 0.0106<br>0.0040 -0.0001 -0.0190 -0.0619 0.0093<br>-0.0292 -0.1355 -0.0185 0.0395 0.1058<br>-0.0101 0.0294 0.0953 0.4399 0.8586                                                                                      |
| 323. | (0.00044) | RY*( 6) | C 11 | s( 1.03%)p31.66( 32.71%)d64.13( 66.26%)<br>0.0000 0.0006 0.0931 0.0406 0.0005<br>0.0038 -0.0191 0.0216 0.2852 0.0073<br>0.0047 -0.3269 0.0157 -0.0229 -0.3704<br>0.3148 -0.4641 -0.2623 0.4894 -0.1995                                                                                      |
| 324. | (0.00037) | RY*( 7) | C 11 | s( 7.91%)p 3.30( 26.13%)d 8.34( 65.97%)<br>0.0000 -0.0001 0.0890 0.2666 0.0065<br>0.0074 -0.0103 -0.0088 -0.0581 0.0093<br>0.0040 -0.4941 0.0014 0.0163 -0.1149<br>-0.5103 0.5197 -0.1355 0.2277 -0.2429                                                                                    |
| 325. | (0.00030) | RY*( 8) | C 11 | s( 9.85%)p 7.85( 77.30%)d 1.30( 12.85%)<br>0.0000 0.0032 -0.1701 0.2631 -0.0171<br>0.0051 0.0147 -0.0053 -0.7785 0.0015<br>-0.0086 -0.1928 0.0038 0.0107 -0.3596<br>0.3052 -0.0642 0.0157 -0.1744 0.0241                                                                                    |
| 326. | (0.00024) | RY*( 9) | C 11 | s( 78.41%)p 0.19( 14.82%)d 0.09( 6.77%)<br>0.0000 0.0015 -0.0221 0.8850 -0.0143<br>-0.0117 0.0047 0.0116 0.2808 0.0005<br>0.0043 0.1918 0.0043 0.0127 0.1795<br>0.2204 0.0392 -0.0501 -0.1162 -0.0395                                                                                       |
| 327. | (0.00013) | RY*(10) | C 11 | s( 0.31%)p99.99( 67.45%)d99.99( 32.24%)<br>0.0000 -0.0004 0.0317 0.0176 0.0395<br>0.0143 0.0104 -0.0349 0.3991 -0.0042<br>0.0681 -0.0478 -0.0124 0.0483 -0.7102<br>-0.0989 0.1005 0.1956 -0.4229 0.2923                                                                                     |
| 328. | (0.00013) | RY*(11) | C 11 | s( 1.29%)p53.39( 68.65%)d23.38( 30.07%)<br>0.0000 0.0039 0.0725 0.0629 0.0584<br>0.0148 -0.0110 0.0299 -0.1800 0.0121<br>-0.0065 0.7141 -0.0028 -0.0352 -0.3764<br>-0.2602 0.0543 -0.3750 0.2985 0.0152                                                                                     |
| 329. | (0.00007) | RY*(12) | C 11 | s( 4.99%)p 0.72( 3.61%)d18.32( 91.40%)                                                                                                                                                                                                                                                      |
| 330. | (0.00002) | RY*(13) | C 11 | s( 1.03%)p 6.17( 6.37%)d89.75( 92.60%)                                                                                                                                                                                                                                                      |
| 331. | (0.00000) | RY*(14) | C 11 | s( 99.34%)p 0.00( 0.14%)d 0.01( 0.52%)                                                                                                                                                                                                                                                      |
| 332. | (0.00000) | RY*(15) | C 11 | s( 99.35%)p 0.00( 0.35%)d 0.00( 0.30%)                                                                                                                                                                                                                                                      |
| 333. | (0.00634) | RY*( 1) | C 12 | s( 7.69%)p11.03( 84.87%)d 0.97( 7.44%)<br>0.0000 0.0037 0.2766 -0.0203 0.0017<br>-0.0017 -0.0235 -0.0751 0.1174 0.0086<br>0.5312 -0.0500 0.0140 -0.7331 -0.0795<br>0.1208 0.0082 -0.1280 -0.0811 0.1917                                                                                     |
| 334. | (0.00511) | RY*( 2) | C 12 | s( 1.40%)p65.72( 92.04%)d 4.69( 6.56%)<br>0.0000 -0.0031 0.1155 -0.0255 -0.0014<br>-0.0012 0.0082 -0.5300 -0.0679 0.0126<br>-0.6855 -0.0892 0.0083 -0.3917 -0.0559<br>0.0307 0.1126 -0.0088 0.2134 0.0799                                                                                   |
| 335. | (0.00238) | RY*( 3) | C 12 | s( 24.28%)p 3.11( 75.53%)d 0.01( 0.20%)<br>0.0000 -0.0105 0.4925 -0.0071 0.0084<br>-0.0026 -0.0171 -0.6111 0.2237 0.0258<br>0.2700 -0.1493 -0.0226 0.4847 -0.0155<br>-0.0302 -0.0006 -0.0171 -0.0101 -0.0255                                                                                |
| 336. | (0.00135) | RY*( 4) | C 12 | s( 59.61%)p 0.54( 32.35%)d 0.13( 8.04%)<br>0.0000 -0.0010 0.7493 -0.1863 -0.0022<br>-0.0013 0.0040 0.4526 -0.0219 -0.0032                                                                                                                                                                   |



|      |           |         |      |                                                                                                                                                                                                                                                  |
|------|-----------|---------|------|--------------------------------------------------------------------------------------------------------------------------------------------------------------------------------------------------------------------------------------------------|
| 379. | (0.00310) | RY*( 2) | C 15 | s( 0.18%)p99.99( 96.16%)d20.71( 3.66%)<br>0.0000 -0.0003 0.0393 -0.0148 0.0002<br>-0.0002 0.0004 0.0090 -0.0038 0.0032<br>0.7027 0.0937 -0.0032 -0.6715 -0.0897<br>-0.0344 0.0453 -0.0077 -0.0878 -0.1600                                        |
| 380. | (0.00160) | RY*( 3) | C 15 | s( 11.71%)p 7.53( 88.15%)d 0.01( 0.14%)<br>0.0000 -0.0014 0.3410 -0.0284 -0.0033<br>0.0024 -0.0009 0.5403 -0.1207 0.0162<br>0.4745 -0.1990 0.0167 0.5218 -0.1937<br>-0.0190 -0.0290 -0.0072 0.0099 -0.0034                                       |
| 381. | (0.00094) | RY*( 4) | C 15 | s( 76.74%)p 0.30( 22.94%)d 0.00( 0.31%)<br>0.0000 -0.0027 0.8678 -0.1193 -0.0004<br>0.0112 -0.0207 0.0321 -0.0600 -0.0011<br>-0.3514 -0.0196 -0.0018 -0.3167 -0.0134<br>-0.0233 -0.0364 0.0254 0.0230 -0.0095                                    |
| 382. | (0.00030) | RY*( 5) | C 15 | s( 0.02%)p99.99( 3.33%)d99.99( 96.65%)<br>0.0000 -0.0013 0.0111 0.0097 0.0011<br>-0.0019 0.0000 0.0028 0.0656 0.0019<br>-0.0920 0.0837 -0.0024 0.1161 -0.0061<br>0.3311 -0.3063 -0.0153 -0.3948 -0.7791                                          |
| 383. | (0.00022) | RY*( 6) | C 15 | s( 4.55%)p14.30( 65.07%)d 6.68( 30.38%)<br>0.0000 -0.0096 0.1743 -0.1184 0.0241<br>-0.0202 -0.0074 -0.0046 0.6078 -0.0085<br>0.1649 0.3409 -0.0060 0.1543 0.3374<br>0.3465 0.2949 0.0257 0.3080 -0.0355                                          |
| 384. | (0.00013) | RY*( 7) | C 15 | s( 27.08%)p 1.47( 39.86%)d 1.22( 33.06%)<br>0.0000 0.0083 0.0586 0.5149 -0.0241<br>0.0397 -0.0150 -0.1165 0.2011 -0.0084<br>-0.0584 -0.4201 -0.0090 -0.0643 -0.4002<br>0.3778 0.3944 -0.1723 -0.0497 0.0131                                      |
| 385. | (0.00007) | RY*( 8) | C 15 | s( 3.66%)p 2.79( 10.19%)d23.55( 86.15%)                                                                                                                                                                                                          |
| 386. | (0.00007) | RY*( 9) | C 15 | s( 15.98%)p 1.37( 21.93%)d 3.89( 62.09%)                                                                                                                                                                                                         |
| 387. | (0.00005) | RY*(10) | C 15 | s( 6.93%)p 3.06( 21.18%)d10.37( 71.89%)                                                                                                                                                                                                          |
| 388. | (0.00003) | RY*(11) | C 15 | s( 42.76%)p 1.18( 50.67%)d 0.15( 6.57%)                                                                                                                                                                                                          |
| 389. | (0.00001) | RY*(12) | C 15 | s( 2.23%)p37.41( 83.32%)d 6.49( 14.45%)                                                                                                                                                                                                          |
| 390. | (0.00002) | RY*(13) | C 15 | s( 4.03%)p 2.24( 9.03%)d21.56( 86.94%)                                                                                                                                                                                                           |
| 391. | (0.00000) | RY*(14) | C 15 | s( 99.75%)p 0.00( 0.12%)d 0.00( 0.13%)                                                                                                                                                                                                           |
| 392. | (0.00000) | RY*(15) | C 15 | s( 98.31%)p 0.00( 0.46%)d 0.01( 1.23%)                                                                                                                                                                                                           |
| 393. | (0.00830) | RY*( 1) | C 16 | s( 0.65%)p99.99( 97.59%)d 2.71( 1.76%)<br>0.0000 -0.0287 0.0614 -0.0432 -0.0072<br>-0.0014 0.0003 -0.0475 -0.0025 -0.0339<br>-0.1186 -0.0067 0.0288 0.9785 -0.0032<br>0.0367 0.0457 -0.0804 -0.0359 0.0801                                       |
| 394. | (0.00746) | RY*( 2) | C 16 | s( 0.65%)p99.99( 99.03%)d 0.50( 0.32%)<br>0.0000 0.0093 0.0795 -0.0049 -0.0038<br>-0.0017 -0.0282 0.6718 -0.0243 -0.0175<br>0.7226 -0.0183 -0.0277 0.1189 -0.0021<br>0.0011 -0.0397 0.0065 -0.0282 -0.0281                                       |
| 395. | (0.00567) | RY*( 3) | C 16 | s( 0.71%)p99.99( 98.01%)d 1.79( 1.27%)<br>0.0000 0.0186 0.0800 0.0193 -0.0017<br>-0.0003 0.0196 -0.7321 -0.0306 -0.0028<br>0.6623 0.0342 -0.0281 0.0476 -0.0045<br>-0.0582 0.0521 0.0030 -0.0214 -0.0786                                         |
| 396. | (0.00236) | RY*( 4) | C 16 | s( 91.86%)p 0.04( 4.09%)d 0.04( 4.05%)<br>0.0000 -0.0127 0.9579 0.0255 -0.0142<br>-0.0059 -0.0149 0.0142 0.0885 0.0369<br>-0.1068 -0.0171 -0.0286 -0.0804 -0.1109<br>-0.0199 0.0331 -0.1596 -0.0856 -0.0789                                      |
| 397. | (0.00045) | RY*( 5) | C 16 | s( 1.00%)p19.61( 19.63%)d79.30( 79.37%)<br>0.0000 -0.0007 -0.0192 0.0980 0.0057<br>0.0007 -0.0236 0.0530 0.4269 0.0001<br>0.0218 -0.0655 0.0014 -0.0040 -0.0770<br>-0.3511 0.7440 0.1758 0.2186 0.1956                                           |
| 398. | (0.00043) | RY*( 6) | C 16 | s( 6.23%)p 4.55( 28.33%)d10.51( 65.44%)<br>0.0000 0.0002 0.1423 0.2046 0.0109<br>0.0075 0.0107 0.0019 -0.2438 -0.0101<br>0.0200 0.4705 -0.0130 0.0125 0.0398<br>0.1265 -0.0910 0.0740 0.7277 0.3085                                              |
| 399. | (0.00036) | RY*( 7) | C 16 | s( 4.57%)p 3.71( 16.94%)d17.19( 78.50%)<br>0.0000 0.0000 0.0618 0.2045 0.0033<br>0.0052 0.0055 -0.0021 -0.0748 -0.0085<br>-0.0107 0.3760 -0.0062 -0.0013 -0.1489<br>-0.1048 -0.0849 0.5092 -0.5603 0.4399                                        |
| 400. | (0.00030) | RY*( 8) | C 16 | s( 7.78%)p10.13( 78.75%)d 1.73( 13.47%)<br>0.0000 0.0033 -0.1674 0.2222 -0.0173<br>0.0051 -0.0033 0.0144 0.0477 -0.0010<br>0.0093 0.1853 0.0145 0.0001 -0.8663<br>0.1497 0.0479 -0.2949 -0.0118 -0.1513                                          |
| 401. | (0.00024) | RY*( 9) | C 16 | s( 79.96%)p 0.15( 12.35%)d 0.10( 7.69%)<br>0.0000 0.0018 -0.0359 0.8932 -0.0159<br>-0.0108 0.0009 0.0064 -0.0010 -0.0006<br>-0.0043 -0.1840 0.0070 0.0167 0.2988<br>0.1505 0.0592 -0.1837 -0.1218 -0.0469                                        |
| 402. | (0.00012) | RY*(10) | C 16 | s( 1.45%)p44.76( 64.72%)d23.40( 33.83%)<br>0.0000 0.0036 0.0834 0.0633 0.0576<br>0.0127 0.0046 -0.0525 -0.1432 -0.0120<br>0.0192 -0.7208 -0.0116 0.0125 -0.3217<br>0.2141 -0.1376 0.4206 0.2022 0.2361                                           |
| 403. | (0.00013) | RY*(11) | C 16 | s( 0.35%)p99.99( 69.96%)d85.77( 29.70%)<br>0.0000 -0.0002 0.0246 -0.0008 0.0492<br>0.0208 -0.0155 0.0505 -0.8303 0.0027<br>-0.0658 -0.0351 0.0020 -0.0028 -0.0422<br>-0.2098 0.4407 0.0362 -0.0719 -0.2285                                       |
| 404. | (0.00007) | RY*(12) | C 16 | s( 5.10%)p 0.84( 4.27%)d17.77( 90.63%)                                                                                                                                                                                                           |
| 405. | (0.00003) | RY*(13) | C 16 | s( 1.00%)p 6.05( 6.06%)d92.66( 92.93%)                                                                                                                                                                                                           |
| 406. | (0.00000) | RY*(14) | C 16 | s( 99.29%)p 0.00( 0.39%)d 0.00( 0.32%)                                                                                                                                                                                                           |
| 407. | (0.00000) | RY*(15) | C 16 | s( 99.39%)p 0.00( 0.15%)d 0.00( 0.46%)                                                                                                                                                                                                           |
| 408. | (0.00258) | RY*( 1) | C 17 | s( 12.60%)p 6.27( 78.96%)d 0.67( 8.43%)<br>0.0000 0.0027 0.3518 -0.0476 0.0005<br>-0.0003 -0.0145 0.6930 -0.0642 -0.0066<br>-0.3347 -0.0568 -0.0088 0.4333 -0.0438<br>0.1883 0.2082 0.0016 0.0701 -0.0246<br>0.1883 0.2082 0.0016 0.0701 -0.0246 |
| 409. | (0.00225) | RY*( 2) | C 17 | s( 0.03%)p99.99( 94.04%)d99.99( 5.92%)<br>0.0000 0.0000 0.0179 -0.0031 0.0001<br>0.0001 -0.0019 0.0560 -0.0032 -0.0104<br>0.7015 0.1026 0.0097 -0.6495 -0.1122<br>0.1562 -0.1288 0.0045 -0.0526 -0.1245                                          |
| 410. | (0.00138) | RY*( 3) | C 17 | s( 2.68%)p36.11( 96.72%)d 0.22( 0.60%)<br>0.0000 0.0018 0.1636 -0.0020 -0.0004<br>-0.0012 -0.0166 -0.6290 0.1651 0.0203<br>0.5039 -0.1591 0.0195 0.4916 -0.1494<br>-0.0427 -0.0195 -0.0262 0.0411 -0.0373                                        |
| 411. | (0.00093) | RY*( 4) | C 17 | s( 83.73%)p 0.16( 13.57%)d 0.03( 2.71%)<br>0.0000 -0.0043 0.9106 -0.0901 -0.0018<br>0.0028 0.0191 -0.1346 0.0250 0.0054<br>-0.2373 0.0120 0.0048 -0.2449 0.0092                                                                                  |

|      |           |         |      |                                                                                                                                                                                                                                                 |
|------|-----------|---------|------|-------------------------------------------------------------------------------------------------------------------------------------------------------------------------------------------------------------------------------------------------|
| 412. | (0.00043) | RY*( 5) | C 17 | -0.1091 -0.1071 0.0599 -0.0031 -0.0091<br>s( 0.00%)p 1.00( 0.28%)d99.99( 99.72%)<br>0.0000 0.0002 0.0046 -0.0004 -0.0004<br>0.0001 0.0001 -0.0060 0.0132 0.0054<br>-0.0114 -0.0439 -0.0052 0.0202 0.0040<br>0.4338 -0.4717 0.0218 0.4078 0.6479 |
| 413. | (0.00010) | RY*( 6) | C 17 | s( 4.43%)p 1.55( 6.86%)d20.02( 88.71%)                                                                                                                                                                                                          |
| 414. | (0.00006) | RY*( 7) | C 17 | s( 15.94%)p 3.03( 48.31%)d 2.24( 35.74%)                                                                                                                                                                                                        |
| 415. | (0.00001) | RY*( 8) | C 17 | s( 8.64%)p 2.90( 25.05%)d 7.68( 66.31%)                                                                                                                                                                                                         |
| 416. | (0.00001) | RY*( 9) | C 17 | s( 2.31%)p 1.37( 3.17%)d40.96( 94.53%)                                                                                                                                                                                                          |
| 417. | (0.00001) | RY*(10) | C 17 | s( 12.09%)p 7.27( 87.89%)d 0.00( 0.02%)                                                                                                                                                                                                         |
| 418. | (0.00001) | RY*(11) | C 17 | s( 13.66%)p 6.30( 86.04%)d 0.02( 0.30%)                                                                                                                                                                                                         |
| 419. | (0.00001) | RY*(12) | C 17 | s( 46.63%)p 1.14( 52.96%)d 0.01( 0.41%)                                                                                                                                                                                                         |
| 420. | (0.00000) | RY*(13) | C 17 | s( 98.57%)p 0.01( 0.82%)d 0.01( 0.61%)                                                                                                                                                                                                          |
| 421. | (0.00000) | RY*(14) | C 17 | s( 98.40%)p 0.00( 0.38%)d 0.01( 1.23%)                                                                                                                                                                                                          |
| 422. | (0.00001) | RY*(15) | C 17 | s( 0.34%)p15.35( 5.18%)d99.99( 94.48%)                                                                                                                                                                                                          |
| 423. | (0.00484) | RY*( 1) | C 18 | s( 5.79%)p15.19( 87.97%)d 1.08( 6.23%)<br>0.0000 0.0084 0.2364 -0.0441 -0.0014<br>-0.0009 -0.0097 0.6671 -0.0273 0.0006<br>-0.3376 0.0763 0.0193 -0.5499 -0.1065<br>-0.0041 -0.1729 0.1628 0.0769 -0.0041                                       |
| 424. | (0.00292) | RY*( 2) | C 18 | s( 0.15%)p99.99( 96.76%)d21.03( 3.09%)<br>0.0000 -0.0003 0.0363 -0.0123 0.0001<br>-0.0006 0.0056 -0.6080 -0.0779 0.0057<br>-0.7051 -0.0942 0.0029 -0.2893 -0.0462<br>-0.0099 -0.0380 0.0355 -0.1676 0.0057                                      |
| 425. | (0.00161) | RY*( 3) | C 18 | s( 11.78%)p 7.48( 88.11%)d 0.01( 0.11%)<br>0.0000 -0.0015 0.3420 -0.0286 -0.0033<br>0.0030 0.0154 0.1907 -0.1033 -0.0162<br>-0.4535 0.1922 0.0070 0.7423 -0.1998<br>-0.0044 -0.0188 0.0162 0.0130 -0.0171                                       |
| 426. | (0.00094) | RY*( 4) | C 18 | s( 77.77%)p 0.28( 21.92%)d 0.00( 0.31%)<br>0.0000 -0.0028 0.8729 -0.1247 -0.0001<br>0.0107 0.0074 -0.2801 0.0149 0.0007<br>0.3445 0.0114 -0.0192 -0.1391 -0.0440<br>-0.0317 -0.0416 0.0093 0.0173 0.0004                                        |
| 427. | (0.00033) | RY*( 5) | C 18 | s( 0.02%)p99.99( 2.62%)d99.99( 97.37%)<br>0.0000 -0.0012 0.0067 0.0101 0.0010<br>-0.0020 0.0056 0.0873 -0.0359 0.0065<br>0.0753 -0.0781 0.0027 0.0471 0.0564<br>0.1807 -0.5755 -0.3027 -0.6252 -0.3569                                          |
| 428. | (0.00021) | RY*( 6) | C 18 | s( 3.75%)p16.37( 61.36%)d 9.31( 34.90%)<br>0.0000 -0.0094 0.1511 -0.1166 0.0243<br>-0.0197 -0.0025 0.1381 -0.0243 0.0085<br>-0.1639 -0.2978 -0.0105 0.0681 0.6881<br>0.1597 0.0115 -0.3282 0.0354 0.4630                                        |
| 429. | (0.00013) | RY*( 7) | C 18 | s( 27.77%)p 1.55( 42.92%)d 1.06( 29.31%)<br>0.0000 0.0088 0.0521 0.5221 -0.0250<br>0.0410 -0.0011 -0.0088 -0.4501 0.0080<br>0.0620 0.4486 -0.0167 -0.1357 -0.0517<br>0.3381 0.2190 -0.2236 -0.1599 0.2352                                       |
| 430. | (0.00007) | RY*( 8) | C 18 | s( 9.72%)p 2.27( 22.08%)d 7.02( 68.21%)                                                                                                                                                                                                         |
| 431. | (0.00007) | RY*( 9) | C 18 | s( 11.74%)p 0.95( 11.16%)d 6.57( 77.10%)                                                                                                                                                                                                        |
| 432. | (0.00004) | RY*(10) | C 18 | s( 11.91%)p 1.23( 14.62%)d 6.17( 73.46%)                                                                                                                                                                                                        |
| 433. | (0.00003) | RY*(11) | C 18 | s( 36.52%)p 1.55( 56.47%)d 0.19( 7.02%)                                                                                                                                                                                                         |
| 434. | (0.00002) | RY*(12) | C 18 | s( 3.22%)p 1.83( 5.87%)d28.26( 90.91%)                                                                                                                                                                                                          |
| 435. | (0.00000) | RY*(13) | C 18 | s( 98.85%)p 0.00( 0.02%)d 0.01( 1.13%)                                                                                                                                                                                                          |
| 436. | (0.00001) | RY*(14) | C 18 | s( 1.37%)p64.19( 88.21%)d 7.58( 10.42%)                                                                                                                                                                                                         |
| 437. | (0.00000) | RY*(15) | C 18 | s( 99.69%)p 0.00( 0.16%)d 0.00( 0.15%)                                                                                                                                                                                                          |
| 438. | (0.00314) | RY*( 1) | C 19 | s( 17.31%)p 4.31( 74.71%)d 0.46( 7.98%)<br>0.0000 0.0026 0.4112 -0.0634 -0.0024<br>0.0002 0.0070 -0.0313 0.0053 -0.0135<br>0.6208 -0.0379 -0.0133 0.5976 -0.0409<br>-0.0545 -0.0518 0.1749 -0.1836 0.0991                                       |
| 439. | (0.00182) | RY*( 2) | C 19 | s( 0.00%)p 1.00( 93.62%)d 0.07( 6.38%)<br>0.0000 0.0002 0.0020 0.0010 0.0000<br>0.0001 0.0005 -0.0120 -0.0062 0.0087<br>-0.6635 -0.1040 -0.0086 0.6884 0.1040<br>0.0060 -0.0187 0.0060 0.1280 0.2168                                            |
| 440. | (0.00121) | RY*( 3) | C 19 | s( 1.64%)p60.03( 98.18%)d 0.11( 0.18%)<br>0.0000 0.0003 0.1220 -0.0382 0.0010<br>0.0005 -0.0310 -0.9501 0.2580 -0.0028<br>-0.0676 -0.0037 -0.0047 -0.0824 0.0128<br>0.0124 0.0197 0.0263 -0.0206 0.0136                                         |
| 441. | (0.00062) | RY*( 4) | C 19 | s( 77.98%)p 0.23( 18.18%)d 0.05( 3.84%)<br>0.0000 -0.0068 0.8826 -0.0278 0.0059<br>-0.0023 -0.0025 0.1381 -0.0740 0.0141<br>-0.2684 0.0966 0.0121 -0.2620 0.0830<br>0.0342 0.1409 0.0349 0.1186 -0.0455                                         |
| 442. | (0.00053) | RY*( 5) | C 19 | s( 0.50%)p 0.56( 0.28%)d99.99( 99.22%)<br>0.0000 -0.0001 0.0706 -0.0014 0.0013<br>0.0006 -0.0009 0.0031 -0.0103 -0.0054<br>-0.0322 -0.0332 0.0068 -0.0055 0.0211<br>0.6876 -0.7007 0.0194 -0.0424 -0.1623                                       |
| 443. | (0.00011) | RY*( 6) | C 19 | s( 2.15%)p 7.52( 16.18%)d37.98( 81.67%)<br>0.0000 -0.0002 -0.0498 0.1362 -0.0217<br>-0.0032 0.0337 0.1185 0.3627 0.0014<br>-0.0078 -0.0971 0.0032 -0.0059 -0.0745<br>0.6072 0.5683 0.1856 -0.2462 0.1731                                        |
| 444. | (0.00009) | RY*( 7) | C 19 | s( 15.21%)p 4.06( 61.68%)d 1.52( 23.11%)                                                                                                                                                                                                        |
| 445. | (0.00004) | RY*( 8) | C 19 | s( 2.56%)p27.56( 70.58%)d10.49( 26.86%)                                                                                                                                                                                                         |
| 446. | (0.00001) | RY*( 9) | C 19 | s( 65.28%)p 0.52( 34.20%)d 0.01( 0.52%)                                                                                                                                                                                                         |
| 447. | (0.00001) | RY*(10) | C 19 | s( 2.74%)p 6.79( 18.60%)d28.70( 78.66%)                                                                                                                                                                                                         |
| 448. | (0.00000) | RY*(11) | C 19 | s( 98.46%)p 0.01( 0.62%)d 0.01( 0.92%)                                                                                                                                                                                                          |
| 449. | (0.00000) | RY*(12) | C 19 | s( 13.10%)p 6.62( 86.76%)d 0.01( 0.14%)                                                                                                                                                                                                         |
| 450. | (0.00001) | RY*(13) | C 19 | s( 4.24%)p 4.41( 18.67%)d18.20( 77.09%)                                                                                                                                                                                                         |
| 451. | (0.00000) | RY*(14) | C 19 | s( 98.65%)p 0.01( 0.57%)d 0.01( 0.79%)                                                                                                                                                                                                          |
| 452. | (0.00001) | RY*(15) | C 19 | s( 0.23%)p32.17( 7.40%)d99.99( 92.37%)                                                                                                                                                                                                          |
| 453. | (0.00833) | RY*( 1) | C 20 | s( 6.18%)p14.35( 88.67%)d 0.83( 5.15%)<br>0.0000 -0.0016 0.2485 0.0024 -0.0036<br>0.0008 -0.0165 -0.5152 0.0745 0.0153<br>0.5670 -0.0272 0.0099 -0.5382 -0.0574<br>-0.1220 0.1397 -0.0234 -0.0223 -0.1267                                       |
| 454. | (0.00511) | RY*( 2) | C 20 | s( 0.05%)p99.99( 90.60%)d99.99( 9.35%)<br>0.0000 0.0015 0.0215 -0.0082 0.0003<br>-0.0003 -0.0296 0.5080 -0.0757 0.0327<br>0.7369 -0.0959 -0.0153 0.2945 -0.0329<br>0.0815 -0.1374 -0.1884 -0.0374 -0.1762                                       |
| 455. | (0.00338) | RY*( 3) | C 20 | s( 1.56%)p61.20( 95.23%)d 2.07( 3.21%)<br>0.0000 -0.0057 0.0952 0.0803 -0.0002<br>-0.0016 0.0144 0.6263 0.0830 -0.0140<br>-0.1566 0.0151 0.0036 -0.6946 -0.2134<br>-0.0227 -0.0915 0.1145 0.0600 -0.0808                                        |
| 456. | (0.00109) | RY*( 4) | C 20 | s( 64.61%)p 0.20( 13.13%)d 0.34( 22.26%)<br>0.0000 -0.0011 0.8027 0.0422 -0.0018<br>-0.0029 -0.0004 0.0205 0.1754 -0.0185                                                                                                                       |

|                             |                                                                                                                                                                                                                                                                                           |
|-----------------------------|-------------------------------------------------------------------------------------------------------------------------------------------------------------------------------------------------------------------------------------------------------------------------------------------|
| 457. (0.00103) RY*( 5) C 20 | -0.2141 -0.0505 0.0166 0.1790 -0.1381<br>0.0287 -0.0640 -0.2656 -0.3822 -0.0330<br>s( 14.61%)p 0.35( 5.08%)d 5.50( 80.31%)<br>0.0000 -0.0014 0.3821 -0.0102 -0.0010<br>-0.0035 0.0125 0.1440 0.0177 0.0036<br>0.0786 -0.0247 0.0135 0.1481 -0.0257<br>-0.0809 0.4682 0.1257 0.6518 0.3698 |
| 458. (0.00055) RY*( 6) C 20 | s( 1.34%)p 4.97( 6.64%)d68.83( 92.02%)<br>0.0000 0.0026 -0.0805 0.0829 0.0020<br>-0.0014 -0.0041 -0.1119 0.1247 0.0014<br>-0.1665 -0.0420 0.0003 -0.0514 -0.0788<br>0.3373 -0.0024 -0.6302 0.4933 -0.4074                                                                                 |
| 459. (0.00055) RY*( 7) C 20 | s( 16.89%)p 2.50( 42.18%)d 2.42( 40.93%)<br>0.0000 -0.0074 0.3346 -0.2379 -0.0160<br>0.0066 0.0113 -0.0561 -0.4269 -0.0097<br>-0.0262 0.1342 -0.0034 -0.0923 0.4572<br>0.0599 -0.5502 0.1092 0.2932 -0.0711                                                                               |
| 460. (0.00020) RY*( 8) C 20 | s( 21.22%)p 2.62( 55.69%)d 1.09( 23.10%)<br>0.0000 0.0031 0.0639 0.4557 -0.0111<br>-0.0158 0.0012 0.0404 0.2161 0.0044<br>-0.0532 -0.4911 -0.0120 0.0524 0.5114<br>-0.0952 0.0810 0.2806 0.0357 -0.3679                                                                                   |
| 461. (0.00018) RY*( 9) C 20 | s( 55.74%)p 0.75( 41.73%)d 0.05( 2.53%)<br>0.0000 0.0022 0.0709 0.7430 0.0012<br>0.0176 -0.0026 -0.0651 -0.3971 0.0033<br>0.0259 0.4530 -0.0033 0.0863 -0.2051<br>0.0304 0.0107 0.1072 0.0203 -0.1113                                                                                     |
| 462. (0.00012) RY*(10) C 20 | s( 3.49%)p11.32( 39.52%)d16.32( 56.99%)<br>0.0000 0.0004 -0.0057 0.1852 0.0192<br>0.0143 0.0095 -0.1689 0.4801 -0.0071<br>0.1102 -0.0979 -0.0025 0.1075 -0.3206<br>0.1930 -0.5833 0.2884 0.2283 0.2389                                                                                    |
| 463. (0.00010) RY*(11) C 20 | s( 7.50%)p 2.72( 20.43%)d 9.60( 72.06%)<br>0.0000 0.0039 -0.0329 0.2704 -0.0229<br>-0.0178 -0.0014 0.0331 -0.0619 -0.0081<br>0.0824 -0.1191 0.0218 -0.2273 0.3553<br>0.5451 0.0500 -0.2395 -0.1801 0.5755                                                                                 |
| 464. (0.00003) RY*(12) C 20 | s( 0.71%)p99.99( 98.58%)d 0.99( 0.71%)                                                                                                                                                                                                                                                    |
| 465. (0.00002) RY*(13) C 20 | s( 8.34%)p 0.24( 1.97%)d10.75( 89.69%)                                                                                                                                                                                                                                                    |
| 466. (0.00000) RY*(14) C 20 | s( 97.98%)p 0.01( 0.62%)d 0.01( 1.40%)                                                                                                                                                                                                                                                    |
| 467. (0.00000) RY*(15) C 20 | s( 99.78%)p 0.00( 0.21%)d 0.00( 0.02%)                                                                                                                                                                                                                                                    |
| 468. (0.00249) RY*( 1) C 21 | s( 13.78%)p 5.53( 76.13%)d 0.73( 10.09%)<br>0.0000 0.0024 0.3664 -0.0590 -0.0001<br>-0.0026 0.0154 -0.6478 0.0434 -0.0063<br>0.2962 -0.0155 -0.0146 0.5000 -0.0358<br>-0.0449 -0.2318 0.1790 0.1097 -0.0332                                                                               |
| 469. (0.00153) RY*( 2) C 21 | s( 0.76%)p99.99( 98.72%)d 0.69( 0.52%)<br>0.0000 -0.0014 0.0870 0.0008 -0.0016<br>0.0006 -0.0140 -0.2676 0.0587 0.0182<br>0.5871 -0.0782 -0.0203 -0.7406 0.1092<br>0.0238 0.0221 -0.0098 0.0134 0.0623                                                                                    |
| 470. (0.00100) RY*( 3) C 21 | s( 0.00%)p 1.00( 91.97%)d 0.09( 8.03%)<br>0.0000 -0.0004 0.0026 -0.0008 0.0005<br>0.0008 0.0062 -0.5661 -0.1025 0.0080<br>-0.6740 -0.1445 0.0025 -0.3344 -0.0413<br>0.1040 -0.0888 -0.1807 0.1081 -0.1315                                                                                 |
| 471. (0.00076) RY*( 4) C 21 | s( 84.63%)p 0.14( 12.08%)d 0.04( 3.29%)<br>0.0000 -0.0045 0.9158 -0.0872 -0.0015<br>0.0056 -0.0139 0.2779 -0.0165 0.0037<br>-0.1690 -0.0076 0.0159 -0.1166 0.0254<br>-0.0146 0.0710 -0.1344 -0.0769 0.0604                                                                                |
| 472. (0.00051) RY*( 5) C 21 | s( 0.08%)p20.82( 1.65%)d99.99( 98.27%)<br>0.0000 -0.0003 0.0274 -0.0065 -0.0006<br>0.0008 -0.0058 -0.0416 -0.0091 -0.0081<br>-0.0932 0.0424 -0.0024 -0.0153 -0.0625<br>-0.0782 0.5233 0.3015 0.6728 0.3989                                                                                |
| 473. (0.00009) RY*( 6) C 21 | s( 2.62%)p 2.08( 5.45%)d35.03( 91.93%)                                                                                                                                                                                                                                                    |
| 474. (0.00005) RY*( 7) C 21 | s( 20.43%)p 1.70( 34.83%)d 2.19( 44.73%)                                                                                                                                                                                                                                                  |
| 475. (0.00003) RY*( 8) C 21 | s( 2.36%)p38.66( 91.09%)d 2.78( 6.55%)                                                                                                                                                                                                                                                    |
| 476. (0.00001) RY*( 9) C 21 | s( 11.19%)p 1.36( 15.24%)d 6.58( 73.57%)                                                                                                                                                                                                                                                  |
| 477. (0.00001) RY*(10) C 21 | s( 40.75%)p 1.43( 58.42%)d 0.02( 0.83%)                                                                                                                                                                                                                                                   |
| 478. (0.00001) RY*(11) C 21 | s( 2.48%)p 2.78( 6.89%)d36.59( 90.64%)                                                                                                                                                                                                                                                    |
| 479. (0.00002) RY*(12) C 21 | s( 19.01%)p 0.78( 14.90%)d 3.48( 66.09%)                                                                                                                                                                                                                                                  |
| 480. (0.00000) RY*(13) C 21 | s( 97.95%)p 0.00( 0.48%)d 0.02( 1.57%)                                                                                                                                                                                                                                                    |
| 481. (0.00000) RY*(14) C 21 | s( 99.15%)p 0.00( 0.47%)d 0.00( 0.38%)                                                                                                                                                                                                                                                    |
| 482. (0.00000) RY*(15) C 21 | s( 4.87%)p18.89( 91.92%)d 0.66( 3.21%)                                                                                                                                                                                                                                                    |
| 483. (0.00799) RY*( 1) C 22 | s( 6.43%)p13.97( 89.81%)d 0.59( 3.76%)<br>0.0000 0.0020 0.2533 -0.0118 -0.0007<br>0.0009 0.0134 0.6618 0.0026 -0.0128<br>-0.6731 0.0254 0.0071 0.0577 -0.0510<br>-0.1103 0.0894 -0.0169 -0.0103 -0.1308                                                                                   |
| 484. (0.00436) RY*( 2) C 22 | s( 0.01%)p99.99( 98.48%)d99.99( 1.50%)<br>0.0000 -0.0008 0.0089 -0.0059 0.0002<br>-0.0003 -0.0061 0.6625 -0.0679 -0.0075<br>0.6757 -0.0807 -0.0046 0.2786 -0.0222<br>0.0392 -0.0590 -0.0821 0.0092 -0.0565                                                                                |
| 485. (0.00274) RY*( 3) C 22 | s( 1.52%)p62.68( 95.16%)d 2.19( 3.32%)<br>0.0000 0.0018 0.1104 0.0547 -0.0021<br>-0.0015 -0.0020 0.2069 0.1109 0.0090<br>0.1725 0.0049 -0.0076 -0.9073 -0.2084<br>0.0559 0.0822 -0.1164 -0.0584 0.0799                                                                                    |
| 486. (0.00104) RY*( 4) C 22 | s( 90.64%)p 0.09( 8.12%)d 0.01( 1.24%)<br>0.0000 -0.0037 0.9516 0.0285 -0.0013<br>0.0015 -0.0103 -0.2010 -0.0835 0.0101<br>0.1468 0.0623 -0.0055 0.0775 0.0467<br>-0.0152 -0.0775 -0.0359 0.0459 0.0525                                                                                   |
| 487. (0.00051) RY*( 5) C 22 | s( 3.06%)p22.44( 68.75%)d 9.20( 28.19%)<br>0.0000 0.0077 -0.0138 0.1738 -0.0012<br>-0.0134 0.0051 -0.0928 -0.0475 -0.0093<br>-0.0847 0.3865 0.0081 0.0808 -0.7165<br>-0.1934 0.0408 0.2362 0.1434 -0.4079                                                                                 |
| 488. (0.00044) RY*( 6) C 22 | s( 0.13%)p18.02( 2.34%)d99.99( 97.53%)<br>0.0000 -0.0004 0.0332 0.0139 0.0001<br>0.0001 -0.0006 0.0703 -0.0048 0.0000<br>0.0864 0.0964 -0.0008 0.0404 0.0065<br>-0.3023 0.3198 0.5919 -0.4850 0.4428                                                                                      |
| 489. (0.00041) RY*( 7) C 22 | s( 0.03%)p24.37( 0.77%)d99.99( 99.20%)<br>0.0000 0.0006 0.0097 0.0144 -0.0033<br>-0.0018 0.0007 -0.0364 0.0510 0.0005<br>-0.0245 0.0540 0.0021 -0.0105 -0.0117<br>0.0383 -0.5049 -0.1030 -0.7844 -0.3313                                                                                  |
| 490. (0.00021) RY*( 8) C 22 | s( 3.77%)p23.23( 87.51%)d 2.31( 8.72%)<br>0.0000 -0.0011 -0.0793 0.1770 -0.0061<br>-0.0045 0.0051 0.0182 -0.7448 -0.0030<br>0.0158 0.4337 -0.0002 -0.1288 0.3394<br>0.0366 0.2090 -0.1260 -0.0768 -0.1429                                                                                 |

|      |           |         |      |                                                                                                                                                                                                             |
|------|-----------|---------|------|-------------------------------------------------------------------------------------------------------------------------------------------------------------------------------------------------------------|
| 491. | (0.00014) | RY*( 9) | C 22 | s( 75.64%)p 0.20( 15.21%)d 0.12( 9.15%)<br>0.0000 0.0064 0.0265 0.8693 0.0039<br>-0.0013 0.0035 -0.0067 0.1586 -0.0035<br>0.0006 -0.3084 0.0010 0.0127 0.1779<br>0.1041 0.1302 0.1520 -0.0109 -0.2013       |
| 492. | (0.00012) | RY*(10) | C 22 | s( 8.46%)p 3.11( 26.30%)d 7.72( 65.25%)<br>0.0000 0.0004 -0.0304 0.2883 0.0158<br>0.0163 0.0005 0.0018 0.0781 0.0063<br>-0.0881 0.2736 -0.0172 0.2358 -0.3439<br>0.3605 0.1130 -0.4591 -0.1796 0.5164       |
| 493. | (0.00008) | RY*(11) | C 22 | s( 2.25%)p 4.90( 11.04%)d38.50( 86.71%)                                                                                                                                                                     |
| 494. | (0.00004) | RY*(12) | C 22 | s( 2.25%)p31.47( 70.72%)d12.03( 27.03%)                                                                                                                                                                     |
| 495. | (0.00002) | RY*(13) | C 22 | s( 7.02%)p 3.66( 25.67%)d 9.59( 67.30%)                                                                                                                                                                     |
| 496. | (0.00000) | RY*(14) | C 22 | s( 99.82%)p 0.00( 0.06%)d 0.00( 0.12%)                                                                                                                                                                      |
| 497. | (0.00000) | RY*(15) | C 22 | s( 99.03%)p 0.00( 0.19%)d 0.01( 0.78%)                                                                                                                                                                      |
| 498. | (0.00304) | RY*( 1) | C 23 | s( 14.33%)p 5.38( 77.09%)d 0.60( 8.58%)<br>0.0000 0.0041 0.3776 -0.0259 -0.0010<br>-0.0027 -0.0051 -0.2877 0.0498 0.0086<br>-0.1145 -0.0138 -0.0128 0.8194 -0.0275<br>0.1050 0.0213 -0.1440 -0.0654 0.2222  |
| 499. | (0.00178) | RY*( 2) | C 23 | s( 0.00%)p 1.00( 96.59%)d 0.04( 3.40%)<br>0.0000 0.0002 0.0055 0.0018 0.0005<br>-0.0008 -0.0045 0.5673 0.0882 -0.0068<br>0.7275 0.1169 -0.0020 0.3009 0.0526<br>-0.0595 0.0966 0.1136 0.0293 0.0860         |
| 500. | (0.00090) | RY*( 3) | C 23 | s( 26.58%)p 2.71( 71.95%)d 0.06( 1.47%)<br>0.0000 -0.0067 0.5133 -0.0472 -0.0040<br>0.0042 0.0191 0.6558 -0.1872 -0.0151<br>-0.4757 0.1270 -0.0041 -0.0910 0.0562<br>0.0116 -0.0648 -0.0272 -0.0263 0.0948  |
| 501. | (0.00051) | RY*( 4) | C 23 | s( 55.24%)p 0.75( 41.17%)d 0.06( 3.59%)<br>0.0000 -0.0030 0.7413 0.0533 0.0077<br>0.0030 0.0008 -0.2947 0.1280 -0.0075<br>0.3630 -0.1780 0.0131 -0.3431 0.1645<br>-0.1300 -0.0809 0.0812 0.0134 -0.0754     |
| 502. | (0.00037) | RY*( 5) | C 23 | s( 0.35%)p 2.88( 1.01%)d99.99( 98.64%)<br>0.0000 -0.0011 0.0589 0.0035 0.0019<br>0.0012 0.0058 -0.0256 -0.0020 0.0066<br>-0.0018 0.0867 0.0033 -0.0331 0.0268<br>0.1982 0.2340 -0.2168 0.9194 0.0113        |
| 503. | (0.00015) | RY*( 6) | C 23 | s( 24.05%)p 1.34( 32.15%)d 1.82( 43.80%)<br>0.0000 0.0062 0.1215 0.4704 -0.0326<br>0.0579 0.0118 0.0905 0.2588 -0.0136<br>-0.1262 -0.0001 0.0098 0.1043 -0.4681<br>-0.1772 0.3721 0.0682 -0.0235 -0.5128    |
| 504. | (0.00010) | RY*( 7) | C 23 | s( 6.09%)p 4.54( 27.65%)d10.89( 66.27%)<br>0.0000 0.0016 0.0423 0.2391 -0.0425<br>-0.0104 -0.0228 -0.0730 -0.0707 0.0164<br>0.0401 0.2758 0.0055 0.0175 -0.4328<br>0.1791 -0.5914 0.4713 0.2030 0.1325      |
| 505. | (0.00008) | RY*( 8) | C 23 | s( 8.10%)p 9.15( 74.11%)d 2.20( 17.79%)                                                                                                                                                                     |
| 506. | (0.00006) | RY*( 9) | C 23 | s( 0.12%)p44.99( 5.52%)d99.99( 94.36%)                                                                                                                                                                      |
| 507. | (0.00003) | RY*(10) | C 23 | s( 8.03%)p 3.51( 28.20%)d 7.95( 63.77%)                                                                                                                                                                     |
| 508. | (0.00002) | RY*(11) | C 23 | s( 11.78%)p 3.49( 41.09%)d 4.00( 47.13%)                                                                                                                                                                    |
| 509. | (0.00001) | RY*(12) | C 23 | s( 39.51%)p 0.58( 22.94%)d 0.95( 37.55%)                                                                                                                                                                    |
| 510. | (0.00000) | RY*(13) | C 23 | s( 98.63%)p 0.00( 0.19%)d 0.01( 1.18%)                                                                                                                                                                      |
| 511. | (0.00001) | RY*(14) | C 23 | s( 7.81%)p10.28( 80.27%)d 1.53( 11.92%)                                                                                                                                                                     |
| 512. | (0.00000) | RY*(15) | C 23 | s( 99.43%)p 0.00( 0.31%)d 0.00( 0.25%)                                                                                                                                                                      |
| 513. | (0.00313) | RY*( 1) | C 24 | s( 17.26%)p 4.33( 74.77%)d 0.46( 7.98%)<br>0.0000 0.0025 0.4104 -0.0641 -0.0024<br>0.0002 -0.0146 0.5312 -0.0377 0.0141<br>-0.6260 0.0379 -0.0003 0.2646 -0.0156<br>-0.1769 0.1238 -0.0422 -0.0293 -0.1746  |
| 514. | (0.00183) | RY*( 2) | C 24 | s( 0.00%)p 1.00( 92.67%)d 0.08( 7.33%)<br>0.0000 0.0001 0.0040 0.0008 -0.0002<br>0.0001 -0.0055 0.6196 0.0938 -0.0060<br>0.6561 0.1011 -0.0024 0.3023 0.0440<br>-0.0315 0.1332 0.0433 0.2161 0.0773         |
| 515. | (0.00121) | RY*( 3) | C 24 | s( 1.40%)p70.17( 98.40%)d 0.14( 0.20%)<br>0.0000 0.0004 0.1121 -0.0381 0.0009<br>0.0005 0.0108 0.3801 -0.1108 0.0025<br>0.0434 0.0076 -0.0292 -0.8786 0.2290<br>-0.0168 0.0316 -0.0220 -0.0136 -0.0015      |
| 516. | (0.00061) | RY*( 4) | C 24 | s( 78.40%)p 0.23( 17.88%)d 0.05( 3.72%)<br>0.0000 -0.0067 0.8849 -0.0286 0.0057<br>-0.0022 0.0128 -0.2917 0.1050 -0.0132<br>0.2683 -0.0973 0.0040 -0.0181 -0.0233<br>-0.0114 -0.0117 -0.0445 -0.0164 0.1862 |
| 517. | (0.00051) | RY*( 5) | C 24 | s( 0.43%)p 2.80( 1.20%)d99.99( 98.38%)<br>0.0000 -0.0001 0.0653 -0.0019 0.0010<br>0.0005 -0.0062 0.0462 0.0290 -0.0080<br>0.0817 0.0402 -0.0036 0.0219 -0.0096<br>0.2971 -0.4841 -0.6180 0.1950 -0.4911     |
| 518. | (0.00011) | RY*( 6) | C 24 | s( 2.26%)p 7.41( 16.75%)d35.82( 80.99%)<br>0.0000 -0.0001 -0.0456 0.1417 -0.0210<br>-0.0041 -0.0131 -0.0620 -0.2491 -0.0009<br>0.0097 0.1132 0.0311 0.1007 0.2784<br>0.1460 0.5257 -0.6214 -0.2588 0.2430   |
| 519. | (0.00008) | RY*( 7) | C 24 | s( 14.95%)p 4.07( 60.89%)d 1.62( 24.17%)                                                                                                                                                                    |
| 520. | (0.00004) | RY*( 8) | C 24 | s( 1.79%)p40.71( 72.99%)d14.07( 25.22%)                                                                                                                                                                     |
| 521. | (0.00001) | RY*( 9) | C 24 | s( 58.82%)p 0.08( 4.89%)d 0.62( 36.29%)                                                                                                                                                                     |
| 522. | (0.00001) | RY*(10) | C 24 | s( 24.49%)p 1.90( 46.61%)d 1.18( 28.90%)                                                                                                                                                                    |
| 523. | (0.00001) | RY*(11) | C 24 | s( 0.29%)p99.99( 42.07%)d99.99( 57.64%)                                                                                                                                                                     |
| 524. | (0.00000) | RY*(12) | C 24 | s( 98.77%)p 0.01( 0.95%)d 0.00( 0.28%)                                                                                                                                                                      |
| 525. | (0.00001) | RY*(13) | C 24 | s( 2.47%)p25.10( 62.03%)d14.36( 35.50%)                                                                                                                                                                     |
| 526. | (0.00000) | RY*(14) | C 24 | s( 0.01%)p99.99( 7.12%)d99.99( 92.87%)                                                                                                                                                                      |
| 527. | (0.00000) | RY*(15) | C 24 | s( 98.71%)p 0.01( 1.03%)d 0.00( 0.27%)                                                                                                                                                                      |
| 528. | (0.00320) | RY*( 1) | C 25 | s( 13.91%)p 5.66( 78.75%)d 0.53( 7.34%)<br>0.0000 0.0040 0.3716 -0.0312 0.0001<br>-0.0019 0.0107 -0.4836 0.0078 -0.0084<br>-0.1366 0.0172 -0.0061 0.7295 -0.0468<br>-0.0173 -0.1960 0.1627 0.0880 0.0212    |
| 529. | (0.00215) | RY*( 2) | C 25 | s( 0.01%)p99.99( 93.59%)d99.99( 6.40%)<br>0.0000 0.0006 0.0105 0.0005 -0.0001<br>-0.0005 -0.0110 0.6307 0.0848 -0.0105<br>0.6601 0.1020 0.0046 0.2875 0.0432<br>-0.0745 0.1327 0.1548 -0.0265 0.1272        |
| 530. | (0.00100) | RY*( 3) | C 25 | s( 14.77%)p 5.69( 83.99%)d 0.08( 1.24%)<br>0.0000 -0.0063 0.3798 -0.0580 -0.0029<br>0.0031 -0.0093 -0.3678 0.0747 0.0143<br>0.5833 -0.1467 -0.0172 -0.5521 0.1786<br>0.0259 -0.0486 -0.0026 0.0233 0.0940   |
| 531. | (0.00069) | RY*( 4) | C 25 | s( 68.72%)p 0.41( 28.04%)d 0.05( 3.25%)<br>0.0000 -0.0033 0.8272 0.0542 0.0014<br>0.0017 -0.0138 0.3427 -0.1802 0.0089<br>-0.3091 0.1663 0.0050 -0.0820 -0.0153                                             |

|      |           |         |   |    |                                                                                                                                                                                                                                                 |
|------|-----------|---------|---|----|-------------------------------------------------------------------------------------------------------------------------------------------------------------------------------------------------------------------------------------------------|
| 532. | (0.00051) | RY*( 5) | C | 25 | -0.0906 0.1035 -0.1111 -0.0293 -0.0191<br>s( 0.07%)p20.46( 1.46%)d99.99( 98.47%)<br>0.0000 -0.0003 0.0263 -0.0047 0.0005<br>0.0003 0.0061 0.0748 0.0311 0.0073<br>0.0816 -0.0073 0.0025 0.0318 0.0141<br>0.0904 -0.4916 -0.1638 -0.7911 -0.2866 |
| 533. | (0.00013) | RY*( 6) | C | 25 | s( 15.00%)p 2.14( 32.12%)d 3.53( 52.89%)<br>0.0000 0.0039 0.0385 0.3798 -0.0442<br>0.0472 -0.0138 -0.1253 0.2170 0.0164<br>0.1423 -0.0028 -0.0077 -0.0492 -0.4850<br>-0.2303 0.3533 0.0692 -0.0479 -0.5865                                      |
| 534. | (0.00011) | RY*( 7) | C | 25 | s( 16.10%)p 1.77( 28.44%)d 3.45( 55.46%)<br>0.0000 0.0023 0.0826 0.3907 -0.0365<br>0.0124 0.0057 0.0046 0.3744 -0.0136<br>-0.0388 -0.1781 0.0199 0.0597 -0.3268<br>0.4364 0.0875 -0.2763 -0.1239 0.5145                                         |
| 535. | (0.00007) | RY*( 8) | C | 25 | s( 3.04%)p28.30( 86.03%)d 3.59( 10.93%)                                                                                                                                                                                                         |
| 536. | (0.00002) | RY*( 9) | C | 25 | s( 6.52%)p 2.91( 18.97%)d11.42( 74.51%)                                                                                                                                                                                                         |
| 537. | (0.00003) | RY*(10) | C | 25 | s( 3.34%)p 8.68( 29.00%)d20.24( 67.66%)                                                                                                                                                                                                         |
| 538. | (0.00002) | RY*(11) | C | 25 | s( 58.06%)p 0.58( 33.75%)d 0.14( 8.19%)                                                                                                                                                                                                         |
| 539. | (0.00002) | RY*(12) | C | 25 | s( 1.62%)p 6.20( 10.05%)d54.52( 88.33%)                                                                                                                                                                                                         |
| 540. | (0.00000) | RY*(13) | C | 25 | s( 99.19%)p 0.00( 0.21%)d 0.01( 0.60%)                                                                                                                                                                                                          |
| 541. | (0.00000) | RY*(14) | C | 25 | s( 0.12%)p99.99( 75.57%)d99.99( 24.31%)                                                                                                                                                                                                         |
| 542. | (0.00000) | RY*(15) | C | 25 | s( 99.58%)p 0.00( 0.25%)d 0.00( 0.17%)                                                                                                                                                                                                          |
| 543. | (0.00258) | RY*( 1) | C | 26 | s( 12.37%)p 6.40( 79.17%)d 0.68( 8.46%)<br>0.0000 0.0027 0.3484 -0.0477 0.0004<br>-0.0003 -0.0009 0.0358 -0.0069 0.0064<br>-0.3249 0.0544 -0.0173 0.8217 -0.0790<br>0.0927 0.0618 -0.1649 -0.0539 0.2052                                        |
| 544. | (0.00225) | RY*( 2) | C | 26 | s( 0.02%)p99.99( 94.07%)d99.99( 5.91%)<br>0.0000 -0.0001 0.0130 -0.0024 0.0001<br>0.0003 0.0091 -0.6066 -0.1006 0.0096<br>-0.6952 -0.1038 0.0028 -0.2557 -0.0544<br>0.0593 -0.1434 -0.1172 -0.1091 -0.0970                                      |
| 545. | (0.00138) | RY*( 3) | C | 26 | s( 2.96%)p32.58( 96.44%)d 0.20( 0.60%)<br>0.0000 -0.0019 0.1720 -0.0029 -0.0004<br>-0.0010 0.0241 0.7259 -0.2066 -0.0214<br>-0.5187 0.1629 -0.0051 -0.3056 0.0693<br>0.0018 -0.0552 0.0505 0.0096 0.0188                                        |
| 546. | (0.00093) | RY*( 4) | C | 26 | s( 83.68%)p 0.16( 13.64%)d 0.03( 2.68%)<br>0.0000 -0.0042 0.9103 -0.0905 -0.0018<br>0.0028 -0.0051 -0.1539 -0.0034 -0.0050<br>0.2370 -0.0114 0.0191 -0.2351 0.0259<br>-0.1057 -0.0625 0.0668 0.0307 -0.0797                                     |
| 547. | (0.00042) | RY*( 5) | C | 26 | s( 0.00%)p 1.00( 0.30%)d99.99( 99.69%)<br>0.0000 0.0002 0.0061 0.0005 -0.0004<br>0.0000 0.0056 -0.0168 -0.0081 0.0060<br>-0.0259 0.0404 0.0026 -0.0130 0.0113<br>0.1701 0.0213 -0.3908 0.8871 -0.1671                                           |
| 548. | (0.00010) | RY*( 6) | C | 26 | s( 4.71%)p 1.57( 7.39%)d18.68( 87.90%)                                                                                                                                                                                                          |
| 549. | (0.00006) | RY*( 7) | C | 26 | s( 15.51%)p 3.13( 48.47%)d 2.32( 36.02%)                                                                                                                                                                                                        |
| 550. | (0.00001) | RY*( 8) | C | 26 | s( 1.17%)p49.67( 58.03%)d34.92( 40.80%)                                                                                                                                                                                                         |
| 551. | (0.00001) | RY*( 9) | C | 26 | s( 1.80%)p53.68( 96.81%)d 0.77( 1.39%)                                                                                                                                                                                                          |
| 552. | (0.00002) | RY*(10) | C | 26 | s( 6.80%)p 3.15( 21.45%)d10.55( 71.75%)                                                                                                                                                                                                         |
| 553. | (0.00001) | RY*(11) | C | 26 | s( 19.26%)p 1.87( 36.11%)d 2.32( 44.63%)                                                                                                                                                                                                        |
| 554. | (0.00000) | RY*(12) | C | 26 | s( 97.16%)p 0.01( 1.40%)d 0.01( 1.44%)                                                                                                                                                                                                          |
| 555. | (0.00001) | RY*(13) | C | 26 | s( 1.59%)p 4.39( 7.00%)d57.32( 91.41%)                                                                                                                                                                                                          |
| 556. | (0.00000) | RY*(14) | C | 26 | s( 54.57%)p 0.72( 39.02%)d 0.12( 6.41%)                                                                                                                                                                                                         |
| 557. | (0.00000) | RY*(15) | C | 26 | s( 98.45%)p 0.01( 0.93%)d 0.01( 0.62%)                                                                                                                                                                                                          |
| 558. | (0.00138) | RY*( 1) | H | 27 | s( 97.51%)p 0.03( 2.49%)<br>-0.0057 0.9874 -0.0087 0.1255 0.0412<br>0.0866                                                                                                                                                                      |
| 559. | (0.00056) | RY*( 2) | H | 27 | s( 97.84%)p 0.02( 2.16%)<br>-0.0002 0.0277 0.9887 -0.0609 0.0104<br>-0.1335                                                                                                                                                                     |
| 560. | (0.00021) | RY*( 3) | H | 27 | s( 0.98%)p99.99( 99.02%)<br>0.0014 -0.0313 0.0940 0.1238 -0.8056<br>0.5708                                                                                                                                                                      |
| 561. | (0.00007) | RY*( 4) | H | 27 | s( 1.33%)p74.07( 98.67%)                                                                                                                                                                                                                        |
| 562. | (0.00005) | RY*( 5) | H | 27 | s( 2.46%)p39.72( 97.54%)                                                                                                                                                                                                                        |
| 563. | (0.00043) | RY*( 1) | H | 28 | s( 96.49%)p 0.04( 3.51%)<br>-0.0058 0.9769 -0.1026 -0.1192 -0.0087<br>-0.1441                                                                                                                                                                   |
| 564. | (0.00038) | RY*( 2) | H | 28 | s( 0.94%)p99.99( 99.06%)<br>-0.0007 0.0926 -0.0286 0.0137 -0.7263<br>0.6803                                                                                                                                                                     |
| 565. | (0.00033) | RY*( 3) | H | 28 | s( 64.93%)p 0.54( 35.07%)<br>0.0116 0.1770 0.7860 0.2902 0.3513<br>0.3782                                                                                                                                                                       |
| 566. | (0.00009) | RY*( 4) | H | 28 | s( 7.40%)p12.51( 92.60%)                                                                                                                                                                                                                        |
| 567. | (0.00002) | RY*( 5) | H | 28 | s( 30.30%)p 2.30( 69.70%)                                                                                                                                                                                                                       |
| 568. | (0.00156) | RY*( 1) | H | 29 | s( 93.90%)p 0.07( 6.10%)<br>-0.0095 0.9689 -0.0035 -0.0267 -0.0138<br>0.2452                                                                                                                                                                    |
| 569. | (0.00056) | RY*( 2) | H | 29 | s( 85.87%)p 0.16( 14.13%)<br>-0.0026 0.0261 0.9263 -0.3027 -0.1787<br>-0.1333                                                                                                                                                                   |
| 570. | (0.00033) | RY*( 3) | H | 29 | s( 11.75%)p 7.51( 88.25%)<br>0.0050 -0.0347 0.3410 0.4800 0.7717<br>0.2380                                                                                                                                                                      |
| 571. | (0.00015) | RY*( 4) | H | 29 | s( 2.65%)p36.75( 97.35%)<br>0.0072 0.1032 0.1256 0.8092 -0.4484<br>-0.3430                                                                                                                                                                      |
| 572. | (0.00005) | RY*( 5) | H | 29 | s( 5.93%)p15.87( 94.07%)                                                                                                                                                                                                                        |
| 573. | (0.00055) | RY*( 1) | H | 30 | s( 13.68%)p 6.31( 86.32%)<br>-0.0026 0.3650 -0.0602 -0.1366 -0.6349<br>0.6644                                                                                                                                                                   |
| 574. | (0.00051) | RY*( 2) | H | 30 | s( 79.32%)p 0.26( 20.68%)<br>-0.0081 0.8830 -0.1161 -0.2230 0.3152<br>-0.2402                                                                                                                                                                   |
| 575. | (0.00033) | RY*( 3) | H | 30 | s( 75.06%)p 0.33( 24.94%)<br>0.0096 0.2351 0.8338 0.3750 -0.2499<br>-0.2152                                                                                                                                                                     |
| 576. | (0.00011) | RY*( 4) | H | 30 | s( 2.56%)p37.99( 97.44%)<br>0.0057 0.0803 0.1385 0.4226 0.6167<br>0.6446                                                                                                                                                                        |
| 577. | (0.00002) | RY*( 5) | H | 30 | s( 29.43%)p 2.40( 70.57%)                                                                                                                                                                                                                       |
| 578. | (0.00050) | RY*( 1) | H | 31 | s( 5.39%)p17.56( 94.61%)<br>0.0004 0.2079 0.1032 -0.6386 -0.6541<br>-0.3323                                                                                                                                                                     |
| 579. | (0.00037) | RY*( 2) | H | 31 | s( 85.18%)p 0.17( 14.82%)<br>0.0054 0.9105 0.1506 -0.0369 0.3788<br>-0.0582                                                                                                                                                                     |
| 580. | (0.00025) | RY*( 3) | H | 31 | s( 79.12%)p 0.26( 20.88%)<br>0.0110 -0.3052 0.8354 -0.2295 0.3511<br>-0.1813                                                                                                                                                                    |



|      |           |         |      |                                                                                |
|------|-----------|---------|------|--------------------------------------------------------------------------------|
| 581. | (0.00004) | RY*( 4) | H 31 | s( 0.42%)p99.99( 99.58%)                                                       |
| 582. | (0.00002) | RY*( 5) | H 31 | s( 29.95%)p 2.34( 70.05%)                                                      |
| 583. | (0.00116) | RY*( 1) | H 32 | s( 93.23%)p 0.07( 6.77%)<br>-0.0084 0.9654 -0.0174 -0.1928 0.0660<br>0.1616    |
| 584. | (0.00054) | RY*( 2) | H 32 | s( 98.81%)p 0.01( 1.19%)<br>0.0001 0.0415 0.9932 0.0368 -0.0799<br>-0.0646     |
| 585. | (0.00034) | RY*( 3) | H 32 | s( 0.35%)p99.99( 99.65%)<br>0.0002 0.0253 0.0537 0.6179 0.7263<br>0.2954       |
| 586. | (0.00012) | RY*( 4) | H 32 | s( 0.12%)p99.99( 99.88%)<br>-0.0020 -0.0220 0.0259 -0.4349 0.6301<br>-0.6423   |
| 587. | (0.00003) | RY*( 5) | H 32 | s( 7.57%)p12.21( 92.43%)                                                       |
| 588. | (0.00117) | RY*( 1) | H 33 | s( 93.16%)p 0.07( 6.84%)<br>-0.0085 0.9650 -0.0182 0.2359 -0.0602<br>-0.0954   |
| 589. | (0.00053) | RY*( 2) | H 33 | s( 98.62%)p 0.01( 1.38%)<br>0.0003 0.0442 0.9921 -0.0811 0.0846<br>0.0034      |
| 590. | (0.00034) | RY*( 3) | H 33 | s( 0.40%)p99.99( 99.60%)<br>0.0004 0.0282 0.0566 -0.0167 -0.7220<br>0.6887     |
| 591. | (0.00011) | RY*( 4) | H 33 | s( 0.15%)p99.99( 99.85%)<br>-0.0018 -0.0236 0.0303 -0.3422 -0.6431<br>-0.6840  |
| 592. | (0.00003) | RY*( 5) | H 33 | s( 7.75%)p11.91( 92.25%)                                                       |
| 593. | (0.00062) | RY*( 1) | H 34 | s( 0.05%)p99.99( 99.95%)<br>-0.0005 0.0197 -0.0108 0.0257 0.6984<br>-0.7149    |
| 594. | (0.00046) | RY*( 2) | H 34 | s( 91.32%)p 0.10( 8.68%)<br>-0.0076 0.9363 -0.1913 -0.2335 -0.1382<br>-0.1147  |
| 595. | (0.00033) | RY*( 3) | H 34 | s( 70.00%)p 0.43( 30.00%)<br>0.0094 0.3291 0.7692 0.4280 0.2379<br>0.2453      |
| 596. | (0.00005) | RY*( 4) | H 34 | s( 0.04%)p99.99( 99.96%)                                                       |
| 597. | (0.00001) | RY*( 5) | H 34 | s( 38.62%)p 1.59( 61.38%)                                                      |
| 598. | (0.00051) | RY*( 1) | H 35 | s( 0.09%)p99.99( 99.91%)<br>0.0002 0.0295 -0.0076 -0.0353 -0.7036<br>0.7091    |
| 599. | (0.00037) | RY*( 2) | H 35 | s( 98.94%)p 0.01( 1.06%)<br>-0.0007 0.9939 0.0405 -0.0798 0.0626<br>0.0172     |
| 600. | (0.00028) | RY*( 3) | H 35 | s( 51.63%)p 0.94( 48.37%)<br>0.0132 -0.0723 0.7148 -0.0492 0.4883<br>0.4928    |
| 601. | (0.00005) | RY*( 4) | H 35 | s( 1.76%)p55.92( 98.24%)                                                       |
| 602. | (0.00001) | RY*( 5) | H 35 | s( 47.61%)p 1.10( 52.39%)                                                      |
| 603. | (0.00050) | RY*( 1) | H 36 | s( 0.08%)p99.99( 99.92%)<br>0.0001 0.0214 -0.0180 0.6433 0.7060<br>0.2950      |
| 604. | (0.00037) | RY*( 2) | H 36 | s( 98.74%)p 0.01( 1.26%)<br>-0.0004 0.9924 0.0505 0.0693 -0.0691<br>-0.0545    |
| 605. | (0.00028) | RY*( 3) | H 36 | s( 52.15%)p 0.92( 47.85%)<br>0.0132 -0.0902 0.7164 0.4538 -0.4791<br>0.2073    |
| 606. | (0.00005) | RY*( 4) | H 36 | s( 1.76%)p55.87( 98.24%)                                                       |
| 607. | (0.00001) | RY*( 5) | H 36 | s( 47.30%)p 1.11( 52.70%)                                                      |
| 608. | (0.00040) | RY*( 1) | H 37 | s( 97.44%)p 0.03( 2.56%)<br>-0.0050 0.9825 -0.0951 0.0976 -0.0998<br>-0.0782   |
| 609. | (0.00034) | RY*( 2) | H 37 | s( 1.52%)p64.78( 98.48%)<br>0.0014 -0.0158 0.1223 -0.6506 -0.7016<br>-0.2632   |
| 610. | (0.00030) | RY*( 3) | H 37 | s( 57.75%)p 0.73( 42.25%)<br>0.0117 0.1752 0.7394 -0.3792 0.3187<br>0.4209     |
| 611. | (0.00004) | RY*( 4) | H 37 | s( 0.15%)p99.99( 99.85%)                                                       |
| 612. | (0.00001) | RY*( 5) | H 37 | s( 43.18%)p 1.32( 56.82%)                                                      |
| 613. | (0.00044) | RY*( 1) | H 38 | s( 98.07%)p 0.02( 1.93%)<br>-0.0054 0.9868 -0.0833 -0.0168 0.0446<br>-0.1306   |
| 614. | (0.00036) | RY*( 2) | H 38 | s( 0.35%)p99.99( 99.65%)<br>0.0007 -0.0116 0.0577 -0.5928 -0.7440<br>-0.3025   |
| 615. | (0.00032) | RY*( 3) | H 38 | s( 63.04%)p 0.59( 36.96%)<br>0.0120 0.1455 0.7804 0.2348 -0.3169<br>0.4626     |
| 616. | (0.00009) | RY*( 4) | H 38 | s( 8.23%)p11.16( 91.77%)                                                       |
| 617. | (0.00002) | RY*( 5) | H 38 | s( 30.38%)p 2.29( 69.62%)                                                      |
| 618. | (0.00055) | RY*( 1) | H 39 | s( 7.95%)p11.58( 92.05%)<br>-0.0019 0.2765 -0.0554 0.6638 0.6574<br>0.2182     |
| 619. | (0.00051) | RY*( 2) | H 39 | s( 86.04%)p 0.16( 13.96%)<br>-0.0078 0.9212 -0.1087 -0.0563 -0.2493<br>-0.2726 |
| 620. | (0.00033) | RY*( 3) | H 39 | s( 73.44%)p 0.36( 26.56%)<br>0.0099 0.2183 0.8286 -0.3694 0.2738<br>0.2328     |
| 621. | (0.00011) | RY*( 4) | H 39 | s( 2.63%)p36.97( 97.37%)<br>0.0062 0.0793 0.1414 0.3517 -0.6069<br>0.6940      |
| 622. | (0.00002) | RY*( 5) | H 39 | s( 30.00%)p 2.33( 70.00%)                                                      |
| 623. | (0.00061) | RY*( 1) | H 40 | s( 0.04%)p99.99( 99.96%)<br>-0.0004 0.0206 -0.0043 -0.6498 -0.6956<br>-0.3057  |
| 624. | (0.00046) | RY*( 2) | H 40 | s( 91.36%)p 0.09( 8.64%)<br>-0.0076 0.9364 -0.1915 0.0108 0.1337<br>-0.2615    |
| 625. | (0.00033) | RY*( 3) | H 40 | s( 70.07%)p 0.43( 29.93%)<br>0.0094 0.3287 0.7698 0.0119 -0.2252<br>0.4985     |
| 626. | (0.00005) | RY*( 4) | H 40 | s( 0.03%)p99.99( 99.97%)                                                       |
| 627. | (0.00001) | RY*( 5) | H 40 | s( 38.53%)p 1.60( 61.47%)                                                      |
| 628. | (0.00041) | RY*( 1) | H 41 | s( 96.10%)p 0.04( 3.90%)<br>-0.0058 0.9723 -0.1250 -0.1627 0.0805<br>0.0778    |
| 629. | (0.00035) | RY*( 2) | H 41 | s( 0.64%)p99.99( 99.36%)<br>0.0007 0.0107 0.0796 0.0217 0.7123<br>-0.6969      |
| 630. | (0.00031) | RY*( 3) | H 41 | s( 60.43%)p 0.65( 39.57%)<br>0.0112 0.2223 0.7448 0.5479 -0.2625<br>-0.1628    |

|      |           |         |      |                                                                                                                                                                                                             |
|------|-----------|---------|------|-------------------------------------------------------------------------------------------------------------------------------------------------------------------------------------------------------------|
| 631. | (0.00005) | RY*( 4) | H 41 | s( 0.07%)p99.99( 99.93%)                                                                                                                                                                                    |
| 632. | (0.00001) | RY*( 5) | H 41 | s( 42.79%)p 1.34( 57.21%)                                                                                                                                                                                   |
| 633. | (0.00048) | RY*( 1) | H 42 | s( 5.22%)p18.17( 94.78%)<br>0.0004 0.2105 0.0885 -0.0132 0.6520<br>-0.7229                                                                                                                                  |
| 634. | (0.00036) | RY*( 2) | H 42 | s( 86.74%)p 0.15( 13.26%)<br>0.0048 0.9208 0.1396 -0.0197 -0.3614<br>-0.0404                                                                                                                                |
| 635. | (0.00024) | RY*( 3) | H 42 | s( 77.24%)p 0.29( 22.76%)<br>0.0114 -0.2829 0.8320 -0.0364 -0.3631<br>-0.3073                                                                                                                               |
| 636. | (0.00004) | RY*( 4) | H 42 | s( 0.79%)p99.99( 99.21%)                                                                                                                                                                                    |
| 637. | (0.00002) | RY*( 5) | H 42 | s( 30.07%)p 2.33( 69.93%)                                                                                                                                                                                   |
| 638. | (0.00165) | RY*( 1) | H 43 | s( 63.65%)p 0.57( 36.35%)<br>0.0016 0.7896 -0.1139 0.3194 -0.2074<br>-0.4674                                                                                                                                |
| 639. | (0.00113) | RY*( 2) | H 43 | s( 42.22%)p 1.37( 57.78%)<br>-0.0083 0.6080 0.2289 -0.3507 0.1919<br>0.6465                                                                                                                                 |
| 640. | (0.00054) | RY*( 3) | H 43 | s( 1.05%)p94.16( 98.95%)<br>0.0006 0.0368 0.0957 0.2219 0.9425<br>-0.2278                                                                                                                                   |
| 641. | (0.00042) | RY*( 4) | H 43 | s( 61.19%)p 0.63( 38.81%)<br>0.0043 -0.0159 0.7821 -0.4121 -0.0925<br>-0.4580                                                                                                                               |
| 642. | (0.00012) | RY*( 5) | H 43 | s( 31.90%)p 2.13( 68.10%)<br>-0.0032 -0.0719 0.5602 0.7456 -0.1525<br>0.3190                                                                                                                                |
| 643. | (0.00268) | RY*( 1) | O 44 | s( 0.27%)p99.99( 98.73%)d 3.63( 0.99%)<br>0.0000 0.0008 0.0495 -0.0167 -0.0015<br>0.0015 0.0037 0.5904 -0.0443 0.0022<br>0.6376 -0.0385 0.0048 0.4764 -0.0428<br>0.0247 -0.0562 0.0030 -0.0385 -0.0684      |
| 644. | (0.00195) | RY*( 2) | O 44 | s( 0.01%)p 1.00( 99.34%)d 0.01( 0.65%)<br>0.0000 0.0006 0.0080 -0.0002 -0.0006<br>-0.0001 0.0045 0.7813 -0.0602 -0.0027<br>-0.3429 0.0337 -0.0021 -0.5094 0.0340<br>0.0312 -0.0537 -0.0011 0.0205 0.0471    |
| 645. | (0.00097) | RY*( 3) | O 44 | s( 77.78%)p 0.07( 5.26%)d 0.22( 16.96%)<br>0.0000 0.0134 0.8718 -0.1324 0.0055<br>-0.0034 0.0057 -0.0469 -0.0290 -0.0418<br>-0.0004 0.1506 0.0420 -0.0501 -0.1444<br>0.0172 -0.0563 0.3510 0.1806 -0.1013   |
| 646. | (0.00020) | RY*( 4) | O 44 | s( 2.60%)p33.44( 86.89%)d 4.05( 10.51%)<br>0.0000 0.0334 -0.1039 0.1169 0.0175<br>-0.0106 0.0059 0.1523 -0.0080 -0.0301<br>-0.6340 0.0374 0.0309 0.6623 -0.0415<br>0.0676 -0.0228 0.2788 0.1217 -0.0868     |
| 647. | (0.00005) | RY*( 5) | O 44 | s( 9.96%)p 1.07( 10.62%)d 7.98( 79.42%)                                                                                                                                                                     |
| 648. | (0.00002) | RY*( 6) | O 44 | s( 1.13%)p17.48( 19.75%)d70.03( 79.12%)                                                                                                                                                                     |
| 649. | (0.00002) | RY*( 7) | O 44 | s( 12.64%)p 3.38( 42.70%)d 3.53( 44.66%)                                                                                                                                                                    |
| 650. | (0.00002) | RY*( 8) | O 44 | s( 1.85%)p16.66( 30.83%)d36.38( 67.32%)                                                                                                                                                                     |
| 651. | (0.00000) | RY*( 9) | O 44 | s( 99.64%)p 0.00( 0.16%)d 0.00( 0.20%)                                                                                                                                                                      |
| 652. | (0.00000) | RY*(10) | O 44 | s( 4.07%)p13.91( 56.59%)d 9.67( 39.34%)                                                                                                                                                                     |
| 653. | (0.00000) | RY*(11) | O 44 | s( 85.92%)p 0.04( 3.41%)d 0.12( 10.67%)                                                                                                                                                                     |
| 654. | (0.00001) | RY*(12) | O 44 | s( 0.11%)p10.26( 1.18%)d99.99( 98.71%)                                                                                                                                                                      |
| 655. | (0.00000) | RY*(13) | O 44 | s( 0.16%)p99.99( 98.02%)d11.49( 1.82%)                                                                                                                                                                      |
| 656. | (0.00000) | RY*(14) | O 44 | s( 98.61%)p 0.00( 0.49%)d 0.01( 0.90%)                                                                                                                                                                      |
| 657. | (0.00000) | RY*(15) | O 44 | s( 5.33%)p 8.93( 47.61%)d 8.83( 47.06%)                                                                                                                                                                     |
| 658. | (0.00499) | RY*( 1) | O 45 | s( 26.86%)p 2.69( 72.26%)d 0.03( 0.88%)<br>0.0000 -0.0198 0.5170 -0.0312 0.0015<br>-0.0005 0.0153 -0.5643 0.0032 -0.0063<br>-0.0458 -0.0003 -0.0009 -0.6338 0.0087<br>0.0455 -0.0274 -0.0025 -0.0769 0.0049 |
| 659. | (0.00420) | RY*( 2) | O 45 | s( 1.14%)p86.01( 98.29%)d 0.50( 0.57%)<br>0.0000 -0.0028 0.1067 0.0059 0.0022<br>0.0003 -0.0072 -0.6719 0.0196 -0.0105<br>-0.1901 -0.0036 0.0076 0.7030 -0.0184<br>0.0244 -0.0063 0.0578 -0.0195 0.0364     |
| 660. | (0.00345) | RY*( 3) | O 45 | s( 0.43%)p99.99( 98.62%)d 2.19( 0.95%)<br>0.0000 -0.0034 0.0657 -0.0028 0.0012<br>0.0003 0.0099 -0.1487 0.0216 0.0170<br>0.9742 0.0208 -0.0015 0.1164 -0.0131<br>-0.0281 -0.0209 -0.0827 -0.0083 0.0371     |
| 661. | (0.00130) | RY*( 4) | O 45 | s( 68.96%)p 0.43( 29.56%)d 0.02( 1.47%)<br>0.0000 0.0172 0.8299 -0.0240 0.0059<br>0.0008 -0.0372 0.4493 -0.0484 0.0058<br>-0.0222 -0.0036 -0.0242 0.2938 -0.0508<br>0.0208 -0.0560 0.0067 -0.1046 -0.0137   |
| 662. | (0.00013) | RY*( 5) | O 45 | s( 0.00%)p 1.00( 2.78%)d34.94( 97.22%)<br>0.0000 -0.0001 0.0010 0.0010 0.0013<br>0.0002 0.0001 0.0233 -0.0160 0.0018<br>0.1008 -0.1251 -0.0013 -0.0168 0.0303<br>0.5515 0.0877 0.7700 0.1740 -0.1927        |
| 663. | (0.00010) | RY*( 6) | O 45 | s( 7.82%)p 0.17( 1.33%)d11.62( 90.85%)                                                                                                                                                                      |
| 664. | (0.00008) | RY*( 7) | O 45 | s( 2.95%)p 1.55( 4.56%)d31.39( 92.49%)                                                                                                                                                                      |
| 665. | (0.00006) | RY*( 8) | O 45 | s( 0.68%)p 1.21( 0.82%)d99.99( 98.49%)                                                                                                                                                                      |
| 666. | (0.00004) | RY*( 9) | O 45 | s( 1.17%)p 3.25( 3.79%)d81.55( 95.05%)                                                                                                                                                                      |
| 667. | (0.00002) | RY*(10) | O 45 | s( 33.91%)p 1.57( 53.31%)d 0.38( 12.78%)                                                                                                                                                                    |
| 668. | (0.00001) | RY*(11) | O 45 | s( 5.85%)p15.57( 91.02%)d 0.54( 3.13%)                                                                                                                                                                      |
| 669. | (0.00002) | RY*(12) | O 45 | s( 0.76%)p99.99( 95.86%)d 4.44( 3.38%)                                                                                                                                                                      |
| 670. | (0.00000) | RY*(13) | O 45 | s( 99.98%)p 0.00( 0.01%)d 0.00( 0.01%)                                                                                                                                                                      |
| 671. | (0.00000) | RY*(14) | O 45 | s( 49.97%)p 0.95( 47.70%)d 0.05( 2.33%)                                                                                                                                                                     |
| 672. | (0.00000) | RY*(15) | O 45 | s( 99.55%)p 0.00( 0.40%)d 0.00( 0.05%)                                                                                                                                                                      |
| 673. | (0.00272) | RY*( 1) | O 46 | s( 0.06%)p99.99( 98.15%)d31.35( 1.79%)<br>0.0000 -0.0008 0.0234 -0.0049 0.0012<br>0.0000 -0.0001 -0.0256 0.0090 -0.0030<br>-0.6248 0.0368 0.0056 0.7653 -0.0579<br>-0.0503 0.1063 -0.0073 -0.0342 -0.0538   |
| 674. | (0.00198) | RY*( 2) | O 46 | s( 3.13%)p30.48( 95.38%)d 0.48( 1.49%)<br>0.0000 0.0004 0.1747 -0.0277 0.0005<br>0.0006 -0.0137 -0.5949 0.0682 -0.0001<br>-0.5850 0.0221 -0.0026 -0.5017 0.0252<br>0.0019 0.0061 0.0083 -0.0879 0.0842      |
| 675. | (0.00131) | RY*( 3) | O 46 | s( 78.05%)p 0.11( 8.78%)d 0.17( 13.17%)<br>0.0000 0.0104 0.8757 -0.1164 0.0034<br>-0.0025 -0.0436 0.2258 0.1165 0.0280<br>0.0624 -0.1071 0.0216 0.0178 -0.0663<br>0.2422 0.2054 -0.0922 -0.1149 0.0956      |
| 676. | (0.00021) | RY*( 4) | O 46 | s( 0.99%)p83.14( 82.14%)d17.07( 16.87%)<br>0.0000 0.0345 -0.0341 0.0846 0.0161<br>-0.0100 -0.0408 -0.7013 0.0635 0.0241<br>0.4573 -0.0272 0.0186 0.3350 -0.0300<br>0.2758 0.2191 -0.0934 -0.1689 0.0857     |
| 677. | (0.00006) | RY*( 5) | O 46 | s( 8.37%)p 1.05( 8.82%)d 9.89( 82.81%)                                                                                                                                                                      |
| 678. | (0.00004) | RY*( 6) | O 46 | s( 1.70%)p 2.47( 4.19%)d55.45( 94.11%)                                                                                                                                                                      |

|      |           |     |      |   |    |                                          |
|------|-----------|-----|------|---|----|------------------------------------------|
| 679. | (0.00002) | RY* | ( 7) | o | 46 | s( 1.97%)p17.23( 33.87%)d32.64( 64.17%)  |
| 680. | (0.00003) | RY* | ( 8) | o | 46 | s( 1.99%)p 5.36( 10.68%)d43.78( 87.32%)  |
| 681. | (0.00002) | RY* | ( 9) | o | 46 | s( 3.90%)p 4.47( 17.44%)d20.17( 78.66%)  |
| 682. | (0.00000) | RY* | (10) | o | 46 | s( 0.64%)p99.99( 93.73%)d 8.78( 5.63%)   |
| 683. | (0.00000) | RY* | (11) | o | 46 | s( 95.27%)p 0.02( 1.59%)d 0.03( 3.14%)   |
| 684. | (0.00001) | RY* | (12) | o | 46 | s( 3.24%)p19.63( 63.65%)d10.21( 33.11%)  |
| 685. | (0.00000) | RY* | (13) | o | 46 | s( 99.53%)p 0.00( 0.15%)d 0.00( 0.32%)   |
| 686. | (0.00000) | RY* | (14) | o | 46 | s( 1.36%)p60.91( 83.03%)d11.45( 15.61%)  |
| 687. | (0.00000) | RY* | (15) | o | 46 | s( 99.87%)p 0.00( 0.04%)d 0.00( 0.09%)   |
| 688. | (0.00268) | RY* | ( 1) | o | 47 | s( 0.28%)p99.99( 98.71%)d 3.62( 1.01%)   |
|      |           |     |      |   |    | 0.0000 0.0008 0.0501 -0.0167 -0.0015     |
|      |           |     |      |   |    | 0.0014 0.0022 0.1613 -0.0189 -0.0023     |
|      |           |     |      |   |    | -0.6461 0.0382 0.0058 0.7337 -0.0578     |
|      |           |     |      |   |    | 0.0127 -0.0645 -0.0249 -0.0465 -0.0546   |
| 689. | (0.00193) | RY* | ( 2) | o | 47 | s( 0.00%)p 1.00( 99.38%)d 0.01( 0.61%)   |
|      |           |     |      |   |    | 0.0000 0.0001 0.0055 -0.0006 -0.0007     |
|      |           |     |      |   |    | 0.0001 -0.0039 -0.8077 0.0585 0.0021     |
|      |           |     |      |   |    | 0.3351 -0.0334 0.0030 0.4723 -0.0389     |
|      |           |     |      |   |    | 0.0161 -0.0028 -0.0268 0.0624 -0.0354    |
| 690. | (0.00097) | RY* | ( 3) | o | 47 | s( 77.50%)p 0.07( 5.26%)d 0.22( 17.23%)  |
|      |           |     |      |   |    | 0.0000 0.0136 0.8702 -0.1328 0.0054      |
|      |           |     |      |   |    | -0.0034 0.0354 -0.0248 -0.1161 0.0416    |
|      |           |     |      |   |    | 0.0047 -0.1503 0.0244 -0.0609 -0.0930    |
|      |           |     |      |   |    | -0.3066 -0.1812 -0.1779 0.0587 0.1021    |
| 691. | (0.00020) | RY* | ( 4) | o | 47 | s( 2.66%)p32.77( 87.14%)d 3.84( 10.20%)  |
|      |           |     |      |   |    | 0.0000 0.0332 -0.1060 0.1176 0.0175      |
|      |           |     |      |   |    | -0.0106 0.0252 0.5206 -0.0337 0.0295     |
|      |           |     |      |   |    | 0.6311 -0.0348 0.0189 0.4441 -0.0252     |
|      |           |     |      |   |    | -0.2156 -0.1226 -0.1820 0.0157 0.0844    |
| 692. | (0.00005) | RY* | ( 5) | o | 47 | s( 10.39%)p 1.00( 10.42%)d 7.62( 79.19%) |
| 693. | (0.00002) | RY* | ( 6) | o | 47 | s( 9.88%)p 4.30( 42.46%)d 4.83( 47.66%)  |
| 694. | (0.00002) | RY* | ( 7) | o | 47 | s( 2.28%)p 2.35( 5.36%)d40.56( 92.37%)   |
| 695. | (0.00002) | RY* | ( 8) | o | 47 | s( 2.01%)p23.42( 47.01%)d25.40( 50.98%)  |
| 696. | (0.00000) | RY* | ( 9) | o | 47 | s( 99.74%)p 0.00( 0.17%)d 0.00( 0.09%)   |
| 697. | (0.00000) | RY* | (10) | o | 47 | s( 1.35%)p56.86( 76.91%)d16.07( 21.74%)  |
| 698. | (0.00000) | RY* | (11) | o | 47 | s( 88.80%)p 0.04( 3.90%)d 0.08( 7.30%)   |
| 699. | (0.00001) | RY* | (12) | o | 47 | s( 0.90%)p 1.34( 1.21%)d99.99( 97.88%)   |
| 700. | (0.00000) | RY* | (13) | o | 47 | s( 1.94%)p34.94( 67.65%)d15.71( 30.41%)  |
| 701. | (0.00000) | RY* | (14) | o | 47 | s( 98.99%)p 0.01( 0.54%)d 0.00( 0.47%)   |
| 702. | (0.00001) | RY* | (15) | o | 47 | s( 3.38%)p16.42( 55.46%)d12.19( 41.16%)  |
| 703. | (0.00289) | RY* | ( 1) | o | 48 | s( 0.13%)p99.99( 97.90%)d14.95( 1.96%)   |
|      |           |     |      |   |    | 0.0000 -0.0001 0.0359 -0.0044 0.0020     |
|      |           |     |      |   |    | -0.0004 0.0060 0.6872 -0.0565 0.0025     |
|      |           |     |      |   |    | 0.6040 -0.0336 0.0024 0.3704 -0.0195     |
|      |           |     |      |   |    | -0.0127 0.0425 0.0489 -0.1059 0.0638     |
| 704. | (0.00205) | RY* | ( 2) | o | 48 | s( 3.01%)p31.72( 95.47%)d 0.51( 1.52%)   |
|      |           |     |      |   |    | 0.0000 0.0002 0.1714 -0.0268 0.0006      |
|      |           |     |      |   |    | 0.0005 0.0041 -0.1603 -0.0107 0.0014     |
|      |           |     |      |   |    | 0.6206 -0.0225 -0.0138 -0.7337 0.0689    |
|      |           |     |      |   |    | -0.0115 0.1011 0.0022 -0.0070 -0.0695    |
| 705. | (0.00134) | RY* | ( 3) | o | 48 | s( 77.29%)p 0.13( 9.78%)d 0.17( 12.93%)  |
|      |           |     |      |   |    | 0.0000 0.0095 0.8717 -0.1141 0.0033      |
|      |           |     |      |   |    | -0.0024 0.0399 -0.1265 -0.1107 -0.0261   |
|      |           |     |      |   |    | -0.0643 0.1065 -0.0283 0.2130 0.0753     |
|      |           |     |      |   |    | 0.1822 0.2396 -0.1615 -0.0999 0.0511     |
| 706. | (0.00022) | RY* | ( 4) | o | 48 | s( 0.72%)p99.99( 82.26%)d23.64( 17.02%)  |
|      |           |     |      |   |    | 0.0000 0.0347 -0.0026 0.0753 0.0153      |
|      |           |     |      |   |    | -0.0094 0.0360 0.6252 -0.0596 -0.0250    |
|      |           |     |      |   |    | -0.4411 0.0277 -0.0283 -0.4777 0.0432    |
|      |           |     |      |   |    | 0.2159 0.2551 -0.2062 -0.1253 0.0183     |
| 707. | (0.00006) | RY* | ( 5) | o | 48 | s( 8.35%)p 1.03( 8.63%)d 9.94( 83.01%)   |
| 708. | (0.00003) | RY* | ( 6) | o | 48 | s( 5.60%)p 1.40( 7.81%)d15.47( 86.59%)   |
| 709. | (0.00004) | RY* | ( 7) | o | 48 | s( 0.06%)p24.78( 1.39%)d99.99( 98.56%)   |
| 710. | (0.00002) | RY* | ( 8) | o | 48 | s( 0.03%)p99.99( 4.58%)d99.99( 95.40%)   |
| 711. | (0.00001) | RY* | ( 9) | o | 48 | s( 1.65%)p 1.77( 2.92%)d57.72( 95.42%)   |
| 712. | (0.00000) | RY* | (10) | o | 48 | s( 1.27%)p77.05( 97.98%)d 0.59( 0.75%)   |
| 713. | (0.00000) | RY* | (11) | o | 48 | s( 98.69%)p 0.00( 0.42%)d 0.01( 0.89%)   |
| 714. | (0.00001) | RY* | (12) | o | 48 | s( 2.00%)p48.22( 96.52%)d 0.74( 1.48%)   |
| 715. | (0.00000) | RY* | (13) | o | 48 | s( 99.93%)p 0.00( 0.03%)d 0.00( 0.04%)   |
| 716. | (0.00000) | RY* | (14) | o | 48 | s( 1.36%)p70.31( 95.95%)d 1.96( 2.68%)   |
| 717. | (0.00000) | RY* | (15) | o | 48 | s( 99.97%)p 0.00( 0.00%)d 0.00( 0.02%)   |
| 718. | (0.01012) | RY* | ( 1) | N | 49 | s( 3.09%)p30.73( 94.95%)d 0.64( 1.96%)   |
|      |           |     |      |   |    | 0.0000 0.0220 0.1676 0.0479 -0.0044      |
|      |           |     |      |   |    | 0.0009 -0.0413 -0.9086 0.0080 0.0199     |
|      |           |     |      |   |    | 0.1394 0.0091 0.0243 0.3186 0.0077       |
|      |           |     |      |   |    | 0.0991 0.0905 0.0230 -0.0282 0.0177      |
| 719. | (0.00673) | RY* | ( 2) | N | 49 | s( 0.41%)p99.99( 99.38%)d 0.53( 0.22%)   |
|      |           |     |      |   |    | 0.0000 -0.0023 0.0554 -0.0314 -0.0052    |
|      |           |     |      |   |    | 0.0021 -0.0016 0.1509 0.0048 0.0218      |
|      |           |     |      |   |    | -0.6807 -0.0009 -0.0265 0.7115 -0.0133   |
|      |           |     |      |   |    | -0.0226 -0.0030 0.0155 0.0198 0.0318     |
| 720. | (0.00501) | RY* | ( 3) | N | 49 | s( 4.17%)p22.37( 93.39%)d 0.58( 2.43%)   |
|      |           |     |      |   |    | 0.0000 0.0080 0.1963 0.0561 -0.0018      |
|      |           |     |      |   |    | 0.0001 -0.0237 0.3472 -0.0321 -0.0083    |
|      |           |     |      |   |    | 0.6942 -0.0010 -0.0050 0.5743 -0.0006    |
|      |           |     |      |   |    | -0.0361 -0.0316 0.0834 -0.0974 0.0746    |
| 721. | (0.00202) | RY* | ( 4) | N | 49 | s( 90.89%)p 0.08( 7.18%)d 0.02( 1.93%)   |
|      |           |     |      |   |    | 0.0000 -0.0140 0.9523 -0.0339 -0.0256    |
|      |           |     |      |   |    | 0.0049 -0.0211 0.0653 -0.0563 0.0173     |
|      |           |     |      |   |    | -0.1277 0.0085 0.0257 -0.2156 -0.0081    |
|      |           |     |      |   |    | -0.0225 -0.1171 0.0365 0.0594 0.0144     |
| 722. | (0.00049) | RY* | ( 5) | N | 49 | s( 0.12%)p 3.56( 0.42%)d99.99( 99.46%)   |
|      |           |     |      |   |    | 0.0000 -0.0001 -0.0204 0.0272 0.0055     |
|      |           |     |      |   |    | -0.0012 0.0025 -0.0101 -0.0217 0.0014    |
|      |           |     |      |   |    | 0.0161 -0.0007 0.0016 -0.0348 -0.0466    |
|      |           |     |      |   |    | -0.2071 0.2422 -0.0344 0.4563 0.8268     |
| 723. | (0.00031) | RY* | ( 6) | N | 49 | s( 1.98%)p 1.67( 3.31%)d47.78( 94.71%)   |
|      |           |     |      |   |    | 0.0000 -0.0022 0.0638 0.1241 0.0181      |
|      |           |     |      |   |    | -0.0046 -0.0025 -0.0041 -0.0481 0.0225   |
|      |           |     |      |   |    | -0.0128 -0.1236 -0.0179 -0.0154 0.1193   |
|      |           |     |      |   |    | -0.6813 0.6126 0.1011 -0.0727 -0.3035    |
| 724. | (0.00032) | RY* | ( 7) | N | 49 | s( 0.94%)p32.13( 30.21%)d73.23( 68.85%)  |
|      |           |     |      |   |    | 0.0000 -0.0026 -0.0625 0.0741 0.0010     |
|      |           |     |      |   |    | 0.0012 -0.0227 -0.0839 -0.1731 0.0257    |
|      |           |     |      |   |    | -0.0758 -0.3410 0.0268 -0.0701 -0.3692   |
|      |           |     |      |   |    | -0.2876 -0.3240 0.3892 -0.5146 0.2908    |
| 725. | (0.00014) | RY* | ( 8) | N | 49 | s( 74.01%)p 0.09( 6.85%)d 0.26( 19.14%)  |
|      |           |     |      |   |    | 0.0000 0.0116 -0.0072 0.8600 -0.0163     |
|      |           |     |      |   |    | 0.0101 0.0061 -0.0067 -0.2248 -0.0039    |
|      |           |     |      |   |    | -0.0450 0.1168 -0.0027 0.0028 0.0464     |
|      |           |     |      |   |    | -0.1003 -0.2346 -0.3542 0.0242 -0.0151   |
| 726. | (0.00012) | RY* | ( 9) | N | 49 | s( 1.18%)p42.47( 50.00%)d41.47( 48.82%)  |
|      |           |     |      |   |    | 0.0000 0.0016 -0.0184 0.1051 0.0115      |
|      |           |     |      |   |    | 0.0157 -0.0104 -0.0540 0.6225 -0.0002    |
|      |           |     |      |   |    | 0.0568 -0.2281 0.0006 0.0470 -0.2280     |
|      |           |     |      |   |    | -0.2871 -0.3609 0.1107 0.4644 -0.2183    |

|                              |                                                                                                                                                                                                                                                                                                                                                                                                                                                                                                                                                                                                                                           |
|------------------------------|-------------------------------------------------------------------------------------------------------------------------------------------------------------------------------------------------------------------------------------------------------------------------------------------------------------------------------------------------------------------------------------------------------------------------------------------------------------------------------------------------------------------------------------------------------------------------------------------------------------------------------------------|
| 727. (0.00008) RY*(10) N 49  | s( 22.46%)p 0.41( 9.24%)d 3.04( 68.30%)                                                                                                                                                                                                                                                                                                                                                                                                                                                                                                                                                                                                   |
| 728. (0.00004) RY*(11) N 49  | s( 0.55%)p99.99( 58.74%)d74.62( 40.72%)                                                                                                                                                                                                                                                                                                                                                                                                                                                                                                                                                                                                   |
| 729. (0.00005) RY*(12) N 49  | s( 0.78%)p66.14( 51.56%)d61.13( 47.66%)                                                                                                                                                                                                                                                                                                                                                                                                                                                                                                                                                                                                   |
| 730. (0.00002) RY*(13) N 49  | s( 1.45%)p64.70( 93.91%)d 3.20( 4.64%)                                                                                                                                                                                                                                                                                                                                                                                                                                                                                                                                                                                                    |
| 731. (0.00000) RY*(14) N 49  | s( 99.50%)p 0.00( 0.23%)d 0.00( 0.28%)                                                                                                                                                                                                                                                                                                                                                                                                                                                                                                                                                                                                    |
| 732. (0.00000) RY*(15) N 49  | s( 98.45%)p 0.01( 1.10%)d 0.00( 0.45%)                                                                                                                                                                                                                                                                                                                                                                                                                                                                                                                                                                                                    |
| 733. (0.01050) RY*( 1) N 50  | s( 3.19%)p29.82( 95.04%)d 0.56( 1.78%)<br>0.0000 0.0216 0.1734 0.0362 -0.0048<br>0.0014 0.0426 0.6799 0.0011 -0.0218<br>-0.1521 -0.0072 -0.0232 -0.6797 0.0103<br>0.0253 0.0730 -0.0908 -0.0392 0.0450                                                                                                                                                                                                                                                                                                                                                                                                                                    |
| 734. (0.00662) RY*( 2) N 50  | s( 0.32%)p99.99( 99.54%)d 0.46( 0.15%)<br>0.0000 -0.0023 0.0442 -0.0345 -0.0047<br>0.0021 -0.0225 0.5609 -0.0147 -0.0228<br>0.7160 0.0008 -0.0128 0.4082 0.0014<br>-0.0170 0.0108 0.0096 0.0294 0.0101                                                                                                                                                                                                                                                                                                                                                                                                                                    |
| 735. (0.00490) RY*( 3) N 50  | s( 4.36%)p21.36( 93.04%)d 0.60( 2.60%)<br>0.0000 0.0085 0.1993 0.0612 -0.0029<br>0.0002 0.0064 0.3895 0.0156 0.0065<br>-0.6534 -0.0004 -0.0250 0.5916 -0.0295<br>-0.0895 0.0839 -0.0171 0.0058 -0.1031                                                                                                                                                                                                                                                                                                                                                                                                                                    |
| 736. (0.00190) RY*( 4) N 50  | s( 90.45%)p 0.08( 7.50%)d 0.02( 2.06%)<br>0.0000 -0.0144 0.9501 -0.0293 -0.0244<br>0.0054 0.0326 -0.2259 0.0113 -0.0188<br>0.1331 -0.0005 -0.0048 -0.0334 -0.0598<br>-0.0509 -0.0730 0.0078 0.0951 -0.0594                                                                                                                                                                                                                                                                                                                                                                                                                                |
| 737. (0.00048) RY*( 5) N 50  | s( 0.18%)p 3.43( 0.61%)d99.99( 99.22%)<br>0.0000 -0.0002 -0.0208 0.0362 0.0052<br>-0.0011 -0.0003 -0.0265 -0.0340 -0.0037<br>-0.0094 0.0190 0.0042 -0.0264 -0.0551<br>-0.0947 0.5617 0.2699 0.6964 0.3314                                                                                                                                                                                                                                                                                                                                                                                                                                 |
| 738. (0.00032) RY*( 6) N 50  | s( 0.63%)p16.85( 10.65%)d99.99( 88.72%)<br>0.0000 -0.0032 0.0126 0.0763 0.0178<br>-0.0031 -0.0063 -0.0170 -0.0300 -0.0333<br>0.0442 0.2808 0.0084 -0.0594 -0.1405<br>-0.5960 0.2288 0.4925 -0.4868 0.0080                                                                                                                                                                                                                                                                                                                                                                                                                                 |
| 739. (0.00032) RY*( 7) N 50  | s( 1.20%)p18.86( 22.59%)d63.63( 76.21%)<br>0.0000 0.0018 0.1026 0.0368 0.0088<br>-0.0035 -0.0190 0.0149 0.2969 0.0095<br>-0.0557 -0.2262 -0.0338 0.0854 0.2726<br>0.2071 -0.1345 0.2634 -0.2738 0.7461                                                                                                                                                                                                                                                                                                                                                                                                                                    |
| 740. (0.00014) RY*( 8) N 50  | s( 87.12%)p 0.03( 2.95%)d 0.11( 9.94%)<br>0.0000 0.0069 -0.0122 0.9332 -0.0047<br>0.0060 -0.0030 0.0029 0.0571 0.0018<br>0.0541 -0.0330 0.0032 -0.0135 -0.1482<br>0.1374 -0.1750 0.1694 0.0915 -0.1132                                                                                                                                                                                                                                                                                                                                                                                                                                    |
| 741. (0.00011) RY*( 9) N 50  | s( 0.07%)p99.99( 54.37%)d99.99( 45.56%)<br>0.0000 0.0017 -0.0152 0.0022 0.0135<br>0.0163 0.0060 0.0680 -0.4948 0.0002<br>-0.0661 0.2421 -0.0100 -0.0182 0.4805<br>-0.2359 -0.5237 0.2033 0.2752 0.0925                                                                                                                                                                                                                                                                                                                                                                                                                                    |
| 742. (0.00008) RY*(10) N 50  | s( 10.54%)p 0.83( 8.77%)d 7.65( 80.68%)                                                                                                                                                                                                                                                                                                                                                                                                                                                                                                                                                                                                   |
| 743. (0.00005) RY*(11) N 50  | s( 2.11%)p19.93( 42.00%)d26.52( 55.89%)                                                                                                                                                                                                                                                                                                                                                                                                                                                                                                                                                                                                   |
| 744. (0.00005) RY*(12) N 50  | s( 0.56%)p99.99( 68.85%)d54.70( 30.59%)                                                                                                                                                                                                                                                                                                                                                                                                                                                                                                                                                                                                   |
| 745. (0.00002) RY*(13) N 50  | s( 1.33%)p69.92( 93.29%)d 4.03( 5.37%)                                                                                                                                                                                                                                                                                                                                                                                                                                                                                                                                                                                                    |
| 746. (0.00000) RY*(14) N 50  | s( 99.48%)p 0.00( 0.22%)d 0.00( 0.30%)                                                                                                                                                                                                                                                                                                                                                                                                                                                                                                                                                                                                    |
| 747. (0.00000) RY*(15) N 50  | s( 98.45%)p 0.01( 1.06%)d 0.00( 0.49%)                                                                                                                                                                                                                                                                                                                                                                                                                                                                                                                                                                                                    |
| 748. (0.00794) RY*( 1) Ru 51 | s( 46.47%)p 0.45( 21.14%)d 0.70( 32.39%)<br>0.0000 0.0000 0.0000 0.0000 -0.0283<br>0.6785 -0.0586 -0.0025 0.0071 0.0033<br>-0.0035 0.0011 -0.0006 -0.0002 -0.0002<br>0.0000 0.0000 0.0000 0.0000 0.0000<br>0.0000 -0.2298 -0.1193 0.0249 -0.0004<br>0.0000 0.0000 0.0000 0.0000 0.1623<br>0.2463 -0.0421 -0.0005 0.0000 0.0000<br>0.0000 0.0000 -0.1138 -0.2031 -0.0279<br>0.0021 -0.0001 0.0000 0.0059 0.0649<br>-0.0474 -0.0040 0.0000 0.0000 0.0080<br>-0.0289 0.0224 0.0061 0.0001 0.0000<br>0.0051 0.3426 -0.1321 -0.0180 -0.0006<br>0.0000 0.0020 0.0990 -0.0294 -0.0110<br>-0.0001 0.0000 0.0114 0.3902 0.1324<br>0.0040 0.0004    |
| 749. (0.00722) RY*( 2) Ru 51 | s( 0.11%)p19.17( 2.14%)d99.99( 97.74%)<br>0.0000 0.0000 0.0000 0.0000 -0.0035<br>0.0240 0.0129 -0.0070 -0.0172 0.0004<br>-0.0043 0.0008 -0.0002 -0.0001 -0.0001<br>0.0000 0.0000 0.0000 0.0000 0.0000<br>0.0000 0.0128 -0.0871 0.0112 -0.0010<br>0.0000 0.0000 0.0000 0.0000 0.0582<br>-0.0277 0.0037 -0.0006 0.0000 0.0000<br>0.0000 0.0000 -0.0736 -0.0625 0.0074<br>0.0001 0.0000 0.0000 0.0022 0.5704<br>0.0325 -0.0050 0.0001 0.0000 -0.0027<br>0.0597 0.0023 0.0015 0.0000 0.0000<br>0.0037 -0.4245 -0.0588 -0.0075 0.0003<br>0.0000 0.0020 0.6801 0.0090 0.0014<br>-0.0004 0.0000 -0.0005 -0.0293 0.0111<br>-0.0004 0.0002         |
| 750. (0.00563) RY*( 3) Ru 51 | s( 11.22%)p 1.03( 11.53%)d 6.88( 77.25%)<br>0.0000 0.0000 0.0000 0.0000 -0.0276<br>0.3306 0.0262 -0.0339 -0.0146 -0.0045<br>0.0094 -0.0003 -0.0001 0.0001 0.0000<br>0.0000 0.0000 0.0000 0.0000 0.0000<br>0.0000 0.0175 -0.0311 0.0390 -0.0020<br>0.0002 0.0000 0.0000 0.0000 0.2623<br>0.1390 -0.0324 0.0026 -0.0001 0.0000<br>0.0000 0.0000 0.1506 -0.0243 -0.0090<br>-0.0008 0.0001 0.0000 0.0059 -0.6528<br>-0.0068 0.0025 0.0001 0.0000 0.0085<br>0.0345 -0.0203 -0.0007 0.0002 0.0000<br>-0.0010 -0.4621 -0.0174 -0.0006 0.0000<br>0.0000 -0.0008 0.2226 -0.0016 -0.0049<br>0.0002 0.0000 -0.0089 -0.2844 -0.0149<br>0.0000 -0.0001 |
| 751. (0.00456) RY*( 4) Ru 51 | s( 0.27%)p68.21( 18.39%)d99.99( 81.34%)<br>0.0000 0.0000 0.0000 0.0000 0.0163<br>0.0353 0.0256 -0.0144 -0.0125 0.0030<br>-0.0125 0.0016 -0.0004 -0.0002 -0.0001<br>0.0000 0.0000 0.0000 0.0000 0.0000<br>0.0000 -0.2658 -0.0695 -0.0093 0.0007<br>0.0000 0.0000 0.0000 0.0000 0.0831<br>-0.1176 0.0181 -0.0013 -0.0001 0.0000<br>0.0000 0.0000 0.2595 -0.1411 0.0012<br>0.0010 0.0000 0.0000 -0.0079 0.1094<br>-0.0279 -0.0137 0.0003 0.0000 0.0041                                                                                                                                                                                       |

|                             |                                          |         |         |         |         |
|-----------------------------|------------------------------------------|---------|---------|---------|---------|
|                             | 0.5858                                   | 0.0271  | -0.0065 | 0.0004  | 0.0000  |
|                             | 0.0012                                   | 0.3825  | -0.0392 | -0.0165 | -0.0003 |
|                             | 0.0000                                   | -0.0002 | 0.0666  | -0.0346 | 0.0014  |
|                             | -0.0006                                  | 0.0000  | -0.0111 | -0.5492 | 0.0314  |
|                             | 0.0048                                   | 0.0000  |         |         |         |
| 752. (0.00420) RY*( 5)Ru 51 | s( 5.31%)p10.90( 57.91%)d 6.92( 36.77%)  |         |         |         |         |
|                             | 0.0000                                   | 0.0000  | 0.0000  | 0.0000  | 0.0030  |
|                             | 0.0739                                   | 0.2157  | -0.0243 | 0.0210  | 0.0101  |
|                             | 0.0018                                   | -0.0016 | 0.0013  | -0.0001 | 0.0003  |
|                             | 0.0000                                   | 0.0000  | 0.0000  | 0.0000  | 0.0000  |
|                             | 0.0000                                   | -0.2099 | -0.0086 | -0.0208 | 0.0001  |
|                             | -0.0001                                  | 0.0000  | 0.0000  | 0.0000  | 0.6865  |
|                             | -0.2354                                  | 0.0045  | 0.0020  | 0.0000  | 0.0000  |
|                             | 0.0000                                   | 0.0000  | 0.0295  | 0.0789  | 0.0289  |
|                             | -0.0014                                  | -0.0001 | 0.0000  | -0.0057 | 0.2854  |
|                             | 0.0493                                   | -0.0007 | 0.0007  | 0.0000  | -0.0120 |
|                             | -0.0536                                  | -0.0116 | -0.0022 | 0.0002  | 0.0000  |
|                             | 0.0108                                   | -0.2601 | 0.0323  | 0.0148  | 0.0007  |
|                             | 0.0000                                   | 0.0067  | -0.4558 | -0.0195 | 0.0070  |
|                             | 0.0004                                   | 0.0000  | -0.0084 | 0.0221  | -0.0530 |
|                             | -0.0025                                  | -0.0002 |         |         |         |
| 753. (0.00393) RY*( 6)Ru 51 | s( 0.12%)p99.99( 60.45%)d99.99( 39.44%)  |         |         |         |         |
|                             | 0.0000                                   | 0.0000  | 0.0000  | 0.0000  | 0.0100  |
|                             | 0.0224                                   | -0.0179 | -0.0125 | -0.0095 | -0.0009 |
|                             | -0.0018                                  | -0.0009 | 0.0005  | 0.0005  | 0.0001  |
|                             | 0.0001                                   | 0.0000  | 0.0000  | 0.0000  | 0.0000  |
|                             | 0.0000                                   | -0.0368 | -0.1112 | 0.0440  | -0.0026 |
|                             | 0.0001                                   | 0.0000  | 0.0000  | 0.0000  | -0.0053 |
|                             | 0.0182                                   | 0.0238  | -0.0014 | 0.0001  | 0.0000  |
|                             | 0.0000                                   | 0.0000  | 0.7666  | 0.0073  | -0.0146 |
|                             | 0.0022                                   | -0.0001 | 0.0000  | 0.0108  | 0.1306  |
|                             | -0.0113                                  | 0.0007  | -0.0001 | 0.0000  | 0.0001  |
|                             | -0.5741                                  | -0.0504 | 0.0031  | 0.0003  | 0.0000  |
|                             | -0.0140                                  | 0.1545  | 0.0258  | -0.0013 | -0.0014 |
|                             | 0.0000                                   | -0.0141 | 0.1069  | 0.0116  | -0.0079 |
|                             | -0.0004                                  | 0.0000  | 0.0004  | -0.0836 | -0.0360 |
|                             | 0.0009                                   | 0.0003  |         |         |         |
| 754. (0.00310) RY*( 7)Ru 51 | s( 5.20%)p14.34( 74.63%)d 3.88( 20.17%)  |         |         |         |         |
|                             | 0.0000                                   | 0.0000  | 0.0000  | 0.0000  | 0.0173  |
|                             | 0.1558                                   | -0.1544 | 0.0463  | -0.0314 | 0.0209  |
|                             | -0.0083                                  | -0.0002 | 0.0007  | 0.0002  | 0.0001  |
|                             | 0.0000                                   | 0.0000  | 0.0000  | 0.0000  | 0.0000  |
|                             | 0.0000                                   | 0.7652  | -0.0200 | -0.0029 | 0.0004  |
|                             | 0.0000                                   | 0.0000  | 0.0000  | 0.0000  | 0.0885  |
|                             | 0.1742                                   | 0.0649  | -0.0058 | 0.0003  | 0.0000  |
|                             | 0.0000                                   | 0.0000  | 0.1670  | -0.2997 | 0.0143  |
|                             | -0.0007                                  | 0.0001  | 0.0000  | -0.0024 | 0.2054  |
|                             | -0.0031                                  | -0.0001 | -0.0010 | 0.0000  | -0.0091 |
|                             | 0.1568                                   | 0.1096  | -0.0004 | -0.0007 | 0.0000  |
|                             | 0.0100                                   | -0.0679 | -0.1633 | -0.0126 | -0.0002 |
|                             | 0.0000                                   | 0.0028  | -0.2777 | -0.0242 | -0.0055 |
|                             | 0.0002                                   | 0.0000  | -0.0012 | -0.0792 | 0.0851  |
|                             | 0.0012                                   | 0.0003  |         |         |         |
| 755. (0.00270) RY*( 8)Ru 51 | s( 10.74%)p 2.29( 24.60%)d 6.02( 64.65%) |         |         |         |         |
|                             | 0.0000                                   | 0.0000  | 0.0000  | 0.0000  | -0.0108 |
|                             | 0.3249                                   | -0.0077 | 0.0390  | 0.0125  | 0.0009  |
|                             | -0.0047                                  | 0.0002  | 0.0001  | 0.0002  | 0.0001  |
|                             | -0.0001                                  | 0.0000  | 0.0000  | 0.0000  | 0.0000  |
|                             | 0.0000                                   | -0.0287 | -0.0963 | 0.0468  | -0.0009 |
|                             | 0.0000                                   | 0.0000  | 0.0000  | 0.0000  | -0.2396 |
|                             | 0.0220                                   | -0.0329 | 0.0003  | -0.0001 | 0.0000  |
|                             | 0.0000                                   | 0.0000  | -0.4074 | 0.0861  | -0.0365 |
|                             | 0.0011                                   | -0.0001 | 0.0000  | 0.0048  | 0.1821  |
|                             | -0.0183                                  | -0.0032 | -0.0003 | 0.0000  | 0.0009  |
|                             | -0.4066                                  | -0.0501 | 0.0005  | -0.0002 | 0.0000  |
|                             | -0.0070                                  | -0.0090 | -0.0538 | 0.0021  | 0.0001  |
|                             | 0.0000                                   | -0.0087 | -0.1897 | -0.0707 | 0.0043  |
|                             | -0.0001                                  | 0.0000  | -0.0095 | -0.6331 | -0.0127 |
|                             | 0.0003                                   | 0.0002  |         |         |         |
| 756. (0.00220) RY*( 9)Ru 51 | s( 4.93%)p10.64( 52.50%)d 8.63( 42.57%)  |         |         |         |         |
|                             | 0.0000                                   | 0.0000  | 0.0000  | 0.0000  | -0.0241 |
|                             | 0.1784                                   | -0.0971 | 0.0771  | 0.0369  | -0.0080 |
|                             | 0.0093                                   | -0.0035 | 0.0012  | -0.0002 | 0.0004  |
|                             | -0.0001                                  | 0.0000  | 0.0000  | 0.0000  | 0.0000  |
|                             | 0.0000                                   | -0.3796 | 0.1330  | -0.0912 | 0.0009  |
|                             | -0.0001                                  | 0.0000  | 0.0000  | 0.0000  | -0.4897 |
|                             | 0.1778                                   | -0.0040 | 0.0017  | -0.0001 | 0.0000  |
|                             | 0.0000                                   | 0.0000  | 0.2868  | -0.0330 | -0.0067 |
|                             | 0.0008                                   | -0.0001 | 0.0000  | -0.0128 | 0.1468  |
|                             | 0.0094                                   | 0.0162  | 0.0000  | 0.0000  | -0.0168 |
|                             | 0.2048                                   | 0.1509  | 0.0118  | 0.0003  | 0.0000  |
|                             | 0.0142                                   | -0.4633 | -0.0306 | 0.0152  | 0.0006  |
|                             | 0.0000                                   | 0.0235  | -0.3295 | -0.0374 | 0.0068  |
|                             | 0.0004                                   | 0.0000  | -0.0023 | 0.1011  | 0.0407  |
|                             | -0.0082                                  | -0.0004 |         |         |         |
| 757. (0.00126) RY*(10)Ru 51 | s( 26.07%)p 2.27( 59.14%)d 0.57( 14.79%) |         |         |         |         |
|                             | 0.0000                                   | 0.0000  | 0.0000  | 0.0000  | -0.0084 |
|                             | 0.3880                                   | 0.3303  | 0.0085  | -0.0252 | -0.0173 |
|                             | -0.0017                                  | -0.0005 | 0.0011  | 0.0012  | 0.0004  |
|                             | 0.0001                                   | 0.0000  | 0.0000  | 0.0000  | 0.0000  |
|                             | 0.0000                                   | 0.2564  | -0.3218 | 0.1187  | -0.0003 |
|                             | -0.0001                                  | 0.0000  | 0.0000  | 0.0000  | -0.2784 |
|                             | -0.4953                                  | -0.0470 | 0.0046  | -0.0002 | 0.0000  |
|                             | 0.0000                                   | 0.0000  | 0.1089  | 0.2658  | -0.0219 |
|                             | -0.0050                                  | 0.0002  | 0.0000  | 0.0043  | -0.0179 |
|                             | 0.0383                                   | -0.0206 | 0.0005  | 0.0000  | 0.0049  |
|                             | 0.1786                                   | -0.0208 | -0.0239 | -0.0005 | 0.0000  |
|                             | 0.0031                                   | -0.0116 | 0.2897  | 0.0292  | 0.0019  |
|                             | 0.0000                                   | -0.0063 | -0.0071 | 0.0657  | 0.0260  |
|                             | 0.0000                                   | 0.0000  | 0.0017  | 0.1507  | 0.0008  |
|                             | -0.0031                                  | -0.0012 |         |         |         |
| 758. (0.00077) RY*(11)Ru 51 | s( 6.85%)p 8.05( 55.15%)d 5.55( 38.00%)  |         |         |         |         |
|                             | 0.0000                                   | 0.0000  | 0.0000  | 0.0000  | 0.0015  |
|                             | -0.1022                                  | 0.2267  | 0.0675  | -0.0249 | 0.0257  |
|                             | -0.0281                                  | 0.0013  | 0.0005  | -0.0010 | -0.0002 |
|                             | 0.0003                                   | 0.0000  | 0.0000  | 0.0000  | 0.0000  |
|                             | 0.0000                                   | -0.0869 | -0.1715 | -0.0166 | -0.0050 |
|                             | 0.0003                                   | 0.0000  | 0.0000  | 0.0000  | -0.1481 |
|                             | -0.3994                                  | 0.1292  | 0.0009  | 0.0001  | 0.0000  |
|                             | 0.0000                                   | 0.0000  | -0.0329 | -0.5308 | 0.1822  |
|                             | -0.0051                                  | 0.0003  | 0.0000  | 0.0084  | -0.1407 |
|                             | -0.2881                                  | -0.0188 | 0.0006  | 0.0000  | 0.0008  |
|                             | -0.1203                                  | -0.1551 | -0.0096 | 0.0001  | 0.0000  |
|                             | 0.0108                                   | -0.1052 | -0.4358 | -0.0296 | -0.0005 |
|                             | 0.0000                                   | -0.0052 | -0.0359 | -0.1617 | -0.0130 |
|                             | -0.0009                                  | 0.0000  | -0.0034 | 0.0751  | 0.0513  |

|                             |                                                                                                                                                                                                                                                                                                                                                                                                                                                                                                                                                                                                                                                          |
|-----------------------------|----------------------------------------------------------------------------------------------------------------------------------------------------------------------------------------------------------------------------------------------------------------------------------------------------------------------------------------------------------------------------------------------------------------------------------------------------------------------------------------------------------------------------------------------------------------------------------------------------------------------------------------------------------|
| 759. (0.00053) RY*(12)Ru 51 | 0.0180 -0.0003<br>$s(14.79\%)p4.77(70.59\%)d0.99(14.61\%)$<br>0.0000 0.0000 0.0000 0.0000 0.0115<br>0.2245 0.2520 0.1647 -0.0774 -0.0261<br>0.0063 -0.0072 0.0013 -0.0010 0.0004<br>-0.0002 0.0000 0.0000 0.0000 0.0000<br>0.0000 0.0682 0.7239 -0.2477 -0.0033<br>0.0005 0.0000 0.0000 0.0000 -0.0367<br>-0.1474 0.0366 0.0079 -0.0004 0.0000<br>0.0000 0.0000 0.0061 -0.2736 0.1280<br>0.0118 -0.0007 0.0000 -0.0066 0.0276<br>0.0702 0.0164 0.0016 0.0000 -0.0028<br>-0.0839 -0.0995 0.0274 0.0019 0.0000<br>-0.0004 0.0773 0.2729 -0.0545 0.0008<br>0.0000 -0.0002 0.1035 0.1334 -0.0159<br>-0.0001 0.0000 -0.0014 -0.0538 -0.0845<br>0.0164 -0.0010 |
| 760. (0.00036) RY*(13)Ru 51 | $s(75.06\%)p0.14(10.77\%)d0.19(14.17\%)$<br>0.0000 0.0000 0.0000 0.0000 0.0035<br>-0.0439 0.1887 0.8442 0.0086 0.0114<br>-0.0036 0.0107 -0.0056 -0.0006 -0.0018<br>0.0004 0.0000 0.0000 0.0000 0.0000<br>0.0000 0.0059 -0.0949 0.1477 0.0041<br>-0.0001 0.0000 0.0000 0.0000 0.0453<br>0.2351 -0.0079 0.0072 -0.0003 0.0000<br>0.0000 0.0000 0.0245 0.1366 -0.0081<br>-0.0070 0.0005 0.0000 -0.0014 0.0147<br>-0.0312 -0.0226 0.0008 0.0000 -0.0001<br>0.0842 -0.1809 -0.0202 -0.0006 0.0000<br>-0.0020 0.0315 -0.1148 -0.0089 0.0020<br>0.0000 0.0021 0.0109 0.0005 0.0017<br>-0.0002 0.0000 0.0026 0.0244 -0.2910<br>-0.0088 -0.0006                   |
| 761. (0.00029) RY*(14)Ru 51 | $s(2.87\%)p9.70(27.88\%)d24.10(69.25\%)$<br>0.0000 0.0000 0.0000 0.0000 0.0071<br>-0.0199 0.1561 -0.0382 -0.0369 0.0068<br>0.0283 -0.0150 0.0054 0.0014 0.0016<br>0.0000 0.0000 0.0000 0.0000 0.0000<br>0.0000 0.0054 -0.2390 -0.2843 -0.0076<br>0.0005 0.0000 0.0000 0.0000 0.0052<br>0.1755 0.2105 0.0010 0.0001 0.0000<br>0.0000 0.0000 -0.0556 -0.1064 0.2262<br>0.0064 -0.0002 0.0000 0.0044 -0.0144<br>-0.1123 -0.0144 -0.0001 0.0000 0.0004<br>-0.0390 0.4547 0.0169 0.0010 0.0000<br>0.0005 0.0332 0.3427 -0.0407 -0.0002<br>0.0000 0.0011 0.0395 -0.4232 -0.0143<br>-0.0017 0.0000 0.0009 0.0032 -0.4115<br>0.0214 0.0000                       |
| 762. (0.00022) RY*(15)Ru 51 | $s(11.55\%)p1.43(16.55\%)d6.22(71.89\%)$<br>0.0000 0.0000 0.0000 0.0000 0.0025<br>0.0537 0.2193 -0.1753 0.1526 0.0873<br>0.0538 -0.0050 0.0017 -0.0004 0.0002<br>-0.0002 0.0000 0.0000 0.0000 0.0000<br>0.0000 0.0760 0.0989 -0.2160 -0.0040<br>0.0000 0.0000 0.0000 0.0000 -0.0067<br>0.0814 -0.1645 0.0129 -0.0004 0.0000<br>0.0000 0.0000 0.0329 0.2606 0.0211<br>-0.0013 0.0001 0.0000 -0.0046 0.0484<br>-0.5900 0.0702 -0.0007 0.0000 -0.0024<br>0.0307 0.1908 0.0453 0.0011 0.0000<br>-0.0057 0.0395 -0.3140 0.0641 0.0003<br>0.0000 -0.0009 0.0240 0.4012 0.0094<br>-0.0002 0.0000 0.0014 -0.0156 -0.2388<br>-0.0311 0.0011                       |
| 763. (0.00018) RY*(16)Ru 51 | $s(15.84\%)p1.22(19.38\%)d4.09(64.78\%)$<br>0.0000 0.0000 0.0000 0.0000 0.0059<br>0.0114 0.3603 -0.1398 -0.0861 -0.0316<br>-0.0162 0.0105 -0.0080 -0.0007 -0.0020<br>-0.0005 -0.0001 -0.0001 0.0000 0.0000<br>0.0000 0.0679 0.1962 0.0250 0.0106<br>-0.0001 0.0000 0.0000 0.0000 -0.0565<br>0.0408 -0.2919 0.0162 -0.0009 0.0000<br>0.0000 0.0000 0.0623 0.2119 0.1039<br>-0.0066 0.0004 0.0000 0.0004 -0.0152<br>0.4551 0.0246 -0.0013 0.0000 0.0075<br>0.0012 0.1760 -0.0018 0.0002 0.0000<br>-0.0078 0.0838 -0.4935 0.0313 -0.0001<br>0.0000 -0.0051 0.0530 -0.3897 0.0059<br>0.0000 0.0000 0.0038 0.0179 -0.0464<br>-0.0010 -0.0007                  |
| 764. (0.00016) RY*(17)Ru 51 | $s(14.99\%)p0.42(6.25\%)d5.26(78.77\%)$<br>0.0000 0.0000 0.0000 0.0000 0.0066<br>-0.0593 0.0503 0.3676 0.0513 -0.0761<br>-0.0081 -0.0101 0.0041 0.0011 0.0017<br>0.0000 0.0000 0.0000 0.0000 0.0000<br>0.0000 0.0002 0.0822 -0.0839 -0.0066<br>0.0007 0.0000 0.0000 0.0000 0.0873<br>-0.1330 -0.0101 -0.0003 0.0008 0.0000<br>0.0000 0.0000 -0.0034 0.1368 -0.0663<br>0.0087 -0.0005 0.0000 0.0033 -0.0539<br>-0.1889 -0.0153 -0.0004 0.0000 0.0005<br>-0.1121 0.5370 -0.0249 0.0008 0.0000<br>-0.0108 0.0165 0.0314 0.0105 0.0015<br>0.0000 -0.0079 0.0821 -0.0995 0.0498<br>-0.0007 0.0000 -0.0032 -0.0481 0.6514<br>-0.0084 0.0006                    |
| 765. (0.00011) RY*(18)Ru 51 | $s(6.78\%)p3.69(25.01\%)d10.06(68.21\%)$<br>0.0000 0.0000 0.0000 0.0000 -0.0051<br>-0.0774 0.1542 0.0719 0.1784 -0.0217<br>0.0234 0.0008 -0.0009 0.0025 0.0001<br>0.0000 0.0000 0.0000 0.0000 0.0000<br>0.0000 -0.0648 -0.2338 -0.1126 0.0118<br>-0.0010 0.0000 0.0000 0.0000 -0.0309<br>-0.0269 -0.0164 -0.0111 0.0003 0.0000<br>0.0000 0.0000 -0.0617 -0.3347 -0.2459<br>0.0062 -0.0008 0.0000 0.0040 -0.0701<br>0.4739 -0.0001 0.0023 0.0000 -0.0008<br>-0.0915 0.3726 0.0041 -0.0017 0.0000<br>0.0033 0.0106 -0.0735 0.0424 0.0023<br>0.0000 -0.0068 -0.0176 0.5299 -0.0028<br>-0.0012 0.0000 -0.0002 -0.0333 -0.1255<br>-0.0039 -0.0004             |
| 766. (0.00007) RY*(19)Ru 51 | $s(39.43\%)p0.96(38.03\%)d0.57(22.54\%)$                                                                                                                                                                                                                                                                                                                                                                                                                                                                                                                                                                                                                 |
| 767. (0.00003) RY*(20)Ru 51 | $s(82.11\%)p0.11(9.21\%)d0.11(8.68\%)$                                                                                                                                                                                                                                                                                                                                                                                                                                                                                                                                                                                                                   |
| 768. (0.00001) RY*(21)Ru 51 | $s(5.61\%)p13.85(77.75\%)d2.97(16.64\%)$                                                                                                                                                                                                                                                                                                                                                                                                                                                                                                                                                                                                                 |

|      |           |           |    |                                          |
|------|-----------|-----------|----|------------------------------------------|
| 769. | (0.00002) | RY*(22)Ru | 51 | s( 17.01%)p 4.45( 75.68%)d 0.43( 7.32%)  |
| 770. | (0.00001) | RY*(23)Ru | 51 | s( 6.68%)p10.73( 71.70%)d 3.24( 21.62%)  |
| 771. | (0.00000) | RY*(24)Ru | 51 | s(100.00%)p 0.00( 0.00%)d 0.00( 0.00%)   |
| 772. | (0.00000) | RY*(25)Ru | 51 | s(100.00%)p 0.00( 0.00%)                 |
| 773. | (0.00000) | RY*(26)Ru | 51 | s(100.00%)                               |
| 774. | (0.00000) | RY*(27)Ru | 51 | s( 0.01%)p99.99( 99.97%)d 1.58( 0.02%)   |
| 775. | (0.00000) | RY*(28)Ru | 51 | s( 0.00%)p 1.00(100.00%)d 0.00( 0.00%)   |
| 776. | (0.00001) | RY*(29)Ru | 51 | s( 92.10%)p 0.05( 4.44%)d 0.04( 3.46%)   |
| 777. | (0.00000) | RY*(30)Ru | 51 | s( 97.48%)p 0.01( 1.01%)d 0.02( 1.51%)   |
| 778. | (0.00000) | RY*(31)Ru | 51 | s( 0.34%)p 3.62( 1.25%)d99.99( 98.41%)   |
| 779. | (0.00000) | RY*(32)Ru | 51 | s( 0.00%)p 0.00( 0.01%)d 1.00( 99.99%)   |
| 780. | (0.00000) | RY*(33)Ru | 51 | s( 99.66%)p 0.00( 0.18%)d 0.00( 0.16%)   |
| 781. | (0.00000) | RY*(34)Ru | 51 | s( 0.01%)p 1.00( 99.95%)d 0.00( 0.05%)   |
| 782. | (0.00000) | RY*(35)Ru | 51 | s( 0.15%)p 8.57( 1.29%)d99.99( 98.56%)   |
| 783. | (0.00000) | RY*(36)Ru | 51 | s( 0.00%)p 0.00( 0.00%)d 1.00( 99.99%)   |
| 784. | (0.00000) | RY*(37)Ru | 51 | s( 0.00%)p 1.00(100.00%)d 0.00( 0.00%)   |
| 785. | (0.00000) | RY*(38)Ru | 51 | s( 99.95%)p 0.00( 0.02%)d 0.00( 0.02%)   |
| 786. | (0.00000) | RY*(39)Ru | 51 | s( 0.34%)p 4.98( 1.71%)d99.99( 97.94%)   |
| 787. | (0.00000) | RY*(40)Ru | 51 | s( 0.00%)p 1.00( 0.02%)d99.99( 99.98%)   |
| 788. | (0.00000) | RY*(41)Ru | 51 | s( 99.99%)p 0.00( 0.01%)d 0.00( 0.00%)   |
| 789. | (0.00000) | RY*(42)Ru | 51 | s( 99.99%)p 0.00( 0.00%)d 0.00( 0.00%)   |
| 790. | (0.00000) | RY*(43)Ru | 51 | s( 0.04%)p82.32( 3.20%)d99.99( 96.77%)   |
| 791. | (0.00000) | RY*(44)Ru | 51 | s( 0.00%)p 1.00( 0.02%)d99.99( 99.98%)   |
| 792. | (0.00000) | RY*(45)Ru | 51 | s( 0.06%)p99.99( 99.86%)d 1.42( 0.08%)   |
| 793. | (0.00000) | RY*(46)Ru | 51 | s( 0.00%)p 1.00(100.00%)d 0.00( 0.00%)   |
| 794. | (0.00000) | RY*(47)Ru | 51 | s( 0.06%)p 6.95( 0.42%)d99.99( 99.52%)   |
| 795. | (0.00000) | RY*(48)Ru | 51 | s( 0.00%)p 0.00( 0.00%)d 1.00(100.00%)   |
| 796. | (0.00849) | RY*( 1)Ru | 52 | s( 24.10%)p 0.44( 10.64%)d 2.71( 65.26%) |
|      |           |           |    | 0.0000 0.0000 0.0000 0.0000 -0.0187      |
|      |           |           |    | 0.4904 0.0023 -0.0127 0.0055 0.0004      |
|      |           |           |    | -0.0057 0.0015 -0.0002 -0.0002 0.0000    |
|      |           |           |    | 0.0000 -0.0003 0.0003 0.0000 0.0000      |
|      |           |           |    | 0.0000 -0.0346 -0.1207 -0.0152 0.0009    |
|      |           |           |    | 0.0000 0.0000 0.0000 0.0000 -0.1053      |
|      |           |           |    | -0.1113 0.0252 0.0002 0.0001 0.0000      |
|      |           |           |    | 0.0000 0.0000 -0.2058 -0.1545 0.0066     |
|      |           |           |    | 0.0014 -0.0001 0.0000 -0.0040 -0.6144    |
|      |           |           |    | 0.0479 0.0104 0.0006 0.0000 0.0065       |
|      |           |           |    | 0.4694 0.0920 0.0072 0.0001 0.0000       |
|      |           |           |    | -0.0054 -0.1349 0.0728 0.0124 -0.0001    |
|      |           |           |    | 0.0000 0.0014 -0.0148 0.0246 -0.0003     |
|      |           |           |    | 0.0000 0.0000 0.0062 -0.1365 -0.0257     |
|      |           |           |    | -0.0066 0.0001                           |
| 797. | (0.00721) | RY*( 2)Ru | 52 | s( 29.32%)p 0.55( 16.04%)d 1.86( 54.64%) |
|      |           |           |    | 0.0000 0.0000 0.0000 0.0000 -0.0344      |
|      |           |           |    | 0.5343 -0.0800 -0.0058 -0.0020 0.0046    |
|      |           |           |    | 0.0052 -0.0005 -0.0001 -0.0001 0.0000    |
|      |           |           |    | 0.0000 -0.0002 0.0002 0.0000 0.0000      |
|      |           |           |    | 0.0000 0.0901 -0.0638 -0.0339 0.0014     |
|      |           |           |    | 0.0000 0.0000 0.0000 0.0000 -0.1771      |
|      |           |           |    | -0.2973 0.0439 0.0004 -0.0001 0.0000     |
|      |           |           |    | 0.0000 0.0000 -0.1073 -0.1170 0.0147     |
|      |           |           |    | -0.0012 0.0001 0.0000 0.0054 0.3547      |
|      |           |           |    | 0.1130 0.0093 0.0004 0.0000 0.0057       |
|      |           |           |    | -0.2623 0.0397 0.0082 0.0004 0.0000      |
|      |           |           |    | -0.0062 0.0748 0.0661 0.0000 0.0005      |
|      |           |           |    | 0.0000 0.0049 0.5551 0.0612 -0.0104      |
|      |           |           |    | 0.0003 0.0000 0.0057 0.1227 0.0070       |
|      |           |           |    | 0.0029 -0.0002                           |
| 798. | (0.00517) | RY*( 3)Ru | 52 | s( 5.28%)p 1.66( 8.79%)d16.27( 85.93%)   |
|      |           |           |    | 0.0000 0.0000 0.0000 0.0000 -0.0147      |
|      |           |           |    | 0.2271 0.0275 -0.0153 -0.0005 -0.0049    |
|      |           |           |    | 0.0058 -0.0003 -0.0001 -0.0001 0.0000    |
|      |           |           |    | 0.0000 -0.0001 0.0001 0.0000 0.0000      |
|      |           |           |    | 0.0000 0.2027 0.0048 -0.0182 -0.0004     |
|      |           |           |    | 0.0000 0.0000 0.0000 0.0000 -0.1174      |
|      |           |           |    | -0.0452 0.0352 -0.0023 0.0002 0.0000     |
|      |           |           |    | 0.0000 0.0000 -0.1673 0.0369 -0.0066     |
|      |           |           |    | 0.0001 0.0001 0.0000 0.0006 -0.1359      |
|      |           |           |    | -0.0164 -0.0007 0.0000 0.0000 -0.0051    |
|      |           |           |    | -0.2237 -0.0112 -0.0022 0.0001 0.0000    |
|      |           |           |    | 0.0038 0.5930 -0.0004 -0.0008 -0.0002    |
|      |           |           |    | 0.0000 -0.0114 -0.5227 0.0023 0.0010     |
|      |           |           |    | -0.0002 0.0000 0.0114 0.4060 0.0193      |
|      |           |           |    | -0.0004 0.0004                           |
| 799. | (0.00477) | RY*( 4)Ru | 52 | s( 3.01%)p 9.04( 27.20%)d23.19( 69.79%)  |
|      |           |           |    | 0.0000 0.0000 0.0000 0.0000 -0.0149      |
|      |           |           |    | 0.0097 0.1713 -0.0127 0.0119 0.0039      |
|      |           |           |    | 0.0112 -0.0028 0.0004 0.0004 0.0001      |
|      |           |           |    | 0.0000 0.0004 -0.0004 0.0000 0.0000      |
|      |           |           |    | 0.0000 0.2609 0.1433 -0.0043 -0.0017     |
|      |           |           |    | 0.0000 0.0000 0.0000 0.0000 -0.4010      |
|      |           |           |    | 0.1079 0.0123 -0.0035 0.0001 0.0000      |
|      |           |           |    | 0.0000 0.0000 0.0630 0.0774 0.0286       |
|      |           |           |    | -0.0016 0.0000 0.0000 0.0035 0.0443      |
|      |           |           |    | -0.0851 -0.0139 -0.0001 0.0000 0.0007    |
|      |           |           |    | 0.0531 -0.1031 -0.0059 -0.0004 0.0000    |
|      |           |           |    | -0.0072 0.4135 -0.0977 -0.0145 -0.0004   |
|      |           |           |    | 0.0000 -0.0034 0.0807 -0.0367 -0.0028    |
|      |           |           |    | 0.0000 0.0000 -0.0069 -0.6960 -0.0434    |
|      |           |           |    | 0.0041 0.0004                            |
| 800. | (0.00417) | RY*( 5)Ru | 52 | s( 1.23%)p48.22( 59.25%)d32.16( 39.52%)  |
|      |           |           |    | 0.0000 0.0000 0.0000 0.0000 -0.0103      |
|      |           |           |    | 0.0033 0.1102 -0.0023 0.0003 0.0021      |
|      |           |           |    | 0.0035 0.0002 -0.0002 -0.0003 -0.0001    |
|      |           |           |    | 0.0000 0.0000 0.0003 0.0000 0.0000       |
|      |           |           |    | 0.0000 -0.6948 -0.0244 0.0314 -0.0032    |
|      |           |           |    | 0.0001 0.0000 0.0000 0.0000 -0.3050      |
|      |           |           |    | 0.0835 0.0101 -0.0020 0.0001 0.0000      |
|      |           |           |    | 0.0000 0.0000 -0.0850 0.0298 0.0028      |
|      |           |           |    | -0.0004 0.0000 0.0000 -0.0171 0.3424     |
|      |           |           |    | 0.0287 -0.0061 -0.0012 0.0000 -0.0069    |
|      |           |           |    | 0.4272 0.0179 -0.0069 -0.0007 0.0000     |
|      |           |           |    | -0.0032 0.2636 -0.0200 -0.0006 -0.0010   |
|      |           |           |    | 0.0000 0.0069 -0.0285 -0.0128 0.0054     |
|      |           |           |    | 0.0002 0.0000 0.0057 0.1511 0.0059       |
|      |           |           |    | -0.0002 0.0003                           |
| 801. | (0.00382) | RY*( 6)Ru | 52 | s( 3.01%)p 9.81( 29.53%)d22.40( 67.46%)  |
|      |           |           |    | 0.0000 0.0000 0.0000 0.0000 0.0169       |
|      |           |           |    | 0.1564 0.0716 -0.0006 0.0051 0.0115      |
|      |           |           |    | -0.0089 -0.0005 0.0003 0.0000 0.0000     |
|      |           |           |    | 0.0000 0.0008 -0.0003 0.0000 0.0000      |
|      |           |           |    | 0.0000 0.1776 -0.0379 0.0239 0.0013      |
|      |           |           |    | -0.0001 0.0000 0.0000 0.0000 -0.4803     |
|      |           |           |    | 0.1208 -0.0219 0.0018 -0.0001 0.0000     |
|      |           |           |    | 0.0000 0.0000 -0.1053 -0.0645 -0.0268    |

|      |                        |                                          |         |         |         |         |
|------|------------------------|------------------------------------------|---------|---------|---------|---------|
|      |                        | 0.0002                                   | -0.0001 | 0.0000  | -0.0122 | 0.3417  |
|      |                        | 0.0545                                   | -0.0011 | 0.0002  | 0.0000  | -0.0184 |
|      |                        | -0.0660                                  | 0.0656  | -0.0001 | 0.0002  | 0.0000  |
|      |                        | 0.0060                                   | -0.5660 | 0.0273  | 0.0053  | -0.0001 |
|      |                        | 0.0000                                   | 0.0022  | -0.4713 | -0.0288 | 0.0036  |
|      |                        | 0.0001                                   | 0.0000  | -0.0018 | -0.0385 | 0.0101  |
|      |                        | 0.0011                                   | 0.0002  |         |         |         |
| 802. | (0.00327) RY*( 7)Ru 52 | s( 2.25%)p41.15( 92.54%)d 2.32( 5.21%)   |         |         |         |         |
|      |                        | 0.0000                                   | 0.0000  | 0.0000  | 0.0000  | 0.0164  |
|      |                        | 0.1132                                   | -0.0805 | 0.0174  | -0.0503 | 0.0048  |
|      |                        | -0.0079                                  | 0.0017  | -0.0001 | 0.0001  | 0.0001  |
|      |                        | 0.0000                                   | -0.0004 | 0.0003  | 0.0000  | 0.0000  |
|      |                        | 0.0000                                   | 0.0110  | -0.2020 | -0.0118 | 0.0006  |
|      |                        | 0.0000                                   | 0.0000  | 0.0000  | 0.0000  | -0.1295 |
|      |                        | -0.1218                                  | -0.0553 | 0.0035  | -0.0001 | 0.0000  |
|      |                        | 0.0000                                   | 0.0000  | 0.8986  | -0.1997 | 0.0481  |
|      |                        | -0.0015                                  | 0.0001  | 0.0000  | -0.0027 | -0.0141 |
|      |                        | 0.0575                                   | 0.0117  | -0.0001 | 0.0000  | 0.0012  |
|      |                        | 0.0826                                   | 0.1054  | 0.0008  | 0.0000  | 0.0000  |
|      |                        | -0.0066                                  | 0.0756  | 0.0662  | 0.0130  | 0.0008  |
|      |                        | 0.0000                                   | -0.0023 | -0.1216 | 0.0135  | -0.0023 |
|      |                        | 0.0002                                   | 0.0000  | -0.0047 | 0.0637  | -0.0327 |
|      |                        | -0.0085                                  | -0.0004 |         |         |         |
| 803. | (0.00256) RY*( 8)Ru 52 | s( 11.20%)p 3.35( 37.47%)d 4.58( 51.33%) |         |         |         |         |
|      |                        | 0.0000                                   | 0.0000  | 0.0000  | 0.0000  | -0.0141 |
|      |                        | 0.3212                                   | -0.0627 | 0.0670  | 0.0125  | 0.0070  |
|      |                        | -0.0027                                  | 0.0011  | 0.0000  | 0.0001  | -0.0001 |
|      |                        | 0.0000                                   | -0.0003 | 0.0001  | 0.0000  | 0.0000  |
|      |                        | 0.0000                                   | -0.4800 | 0.0478  | -0.0374 | -0.0014 |
|      |                        | 0.0001                                   | 0.0000  | 0.0000  | 0.0000  | 0.3514  |
|      |                        | -0.1234                                  | 0.0151  | 0.0006  | 0.0001  | 0.0000  |
|      |                        | 0.0000                                   | 0.0000  | 0.0123  | -0.0282 | 0.0271  |
|      |                        | 0.0005                                   | -0.0001 | 0.0000  | 0.0048  | 0.0635  |
|      |                        | 0.0822                                   | -0.0036 | -0.0007 | 0.0000  | -0.0013 |
|      |                        | -0.3935                                  | -0.0151 | -0.0005 | -0.0004 | 0.0000  |
|      |                        | -0.0036                                  | 0.0064  | 0.0545  | -0.0059 | 0.0003  |
|      |                        | 0.0000                                   | -0.0070 | -0.3381 | -0.0193 | -0.0015 |
|      |                        | 0.0003                                   | 0.0000  | -0.0050 | -0.4759 | -0.0553 |
|      |                        | 0.0021                                   | -0.0001 |         |         |         |
| 804. | (0.00219) RY*( 9)Ru 52 | s( 3.98%)p10.01( 39.84%)d14.11( 56.18%)  |         |         |         |         |
|      |                        | 0.0000                                   | 0.0000  | 0.0000  | 0.0000  | 0.0209  |
|      |                        | -0.1077                                  | 0.1454  | -0.0734 | -0.0342 | -0.0020 |
|      |                        | -0.0082                                  | 0.0040  | -0.0006 | -0.0002 | 0.0001  |
|      |                        | 0.0000                                   | -0.0012 | 0.0009  | 0.0000  | 0.0000  |
|      |                        | 0.0000                                   | -0.3427 | 0.1175  | -0.0679 | 0.0019  |
|      |                        | 0.0000                                   | 0.0000  | 0.0000  | 0.0000  | -0.4443 |
|      |                        | 0.2001                                   | 0.0236  | -0.0002 | 0.0000  | 0.0000  |
|      |                        | 0.0000                                   | 0.0000  | 0.0680  | -0.1072 | 0.0916  |
|      |                        | -0.0015                                  | 0.0001  | 0.0000  | 0.0225  | -0.4482 |
|      |                        | -0.0427                                  | 0.0075  | 0.0008  | 0.0000  | 0.0192  |
|      |                        | -0.5061                                  | -0.1336 | -0.0014 | 0.0007  | 0.0000  |
|      |                        | -0.0047                                  | -0.1162 | 0.0185  | 0.0235  | 0.0002  |
|      |                        | 0.0000                                   | -0.0224 | 0.1874  | 0.0571  | 0.0062  |
|      |                        | -0.0002                                  | 0.0000  | -0.0029 | 0.1280  | -0.1196 |
|      |                        | -0.0093                                  | -0.0004 |         |         |         |
| 805. | (0.00118) RY*(10)Ru 52 | s( 30.85%)p 1.93( 59.54%)d 0.31( 9.61%)  |         |         |         |         |
|      |                        | 0.0000                                   | 0.0000  | 0.0000  | 0.0000  | -0.0098 |
|      |                        | 0.4027                                   | 0.3818  | -0.0035 | -0.0161 | -0.0151 |
|      |                        | -0.0051                                  | -0.0004 | 0.0009  | 0.0011  | 0.0001  |
|      |                        | 0.0000                                   | 0.0009  | -0.0014 | 0.0000  | 0.0000  |
|      |                        | 0.0000                                   | 0.0707  | 0.2960  | -0.0868 | -0.0022 |
|      |                        | 0.0002                                   | 0.0000  | 0.0000  | 0.0000  | 0.3077  |
|      |                        | 0.5750                                   | 0.0662  | -0.0053 | 0.0003  | 0.0000  |
|      |                        | 0.0000                                   | 0.0000  | 0.1534  | -0.1826 | 0.0924  |
|      |                        | -0.0037                                  | 0.0000  | 0.0000  | 0.0001  | 0.1069  |
|      |                        | -0.1565                                  | -0.0277 | -0.0006 | 0.0000  | 0.0030  |
|      |                        | 0.0851                                   | -0.0811 | -0.0269 | -0.0004 | 0.0000  |
|      |                        | -0.0056                                  | -0.0344 | -0.1036 | 0.0053  | -0.0016 |
|      |                        | 0.0000                                   | -0.0057 | 0.0640  | 0.0581  | 0.0245  |
|      |                        | -0.0008                                  | 0.0000  | -0.0003 | 0.1365  | 0.0778  |
|      |                        | 0.0061                                   | -0.0003 |         |         |         |
| 806. | (0.00087) RY*(11)Ru 52 | s( 5.92%)p10.58( 62.60%)d 5.32( 31.48%)  |         |         |         |         |
|      |                        | 0.0000                                   | 0.0000  | 0.0000  | 0.0000  | 0.0020  |
|      |                        | -0.1313                                  | 0.1829  | 0.0679  | -0.0520 | 0.0214  |
|      |                        | -0.0264                                  | 0.0018  | -0.0003 | -0.0008 | 0.0002  |
|      |                        | 0.0000                                   | 0.0007  | 0.0006  | 0.0000  | 0.0000  |
|      |                        | 0.0000                                   | 0.0705  | -0.5471 | 0.1525  | 0.0007  |
|      |                        | 0.0000                                   | 0.0000  | 0.0000  | 0.0000  | 0.1110  |
|      |                        | 0.3586                                   | -0.1089 | 0.0007  | -0.0001 | 0.0000  |
|      |                        | 0.0000                                   | 0.0000  | -0.1683 | -0.3395 | 0.0445  |
|      |                        | -0.0060                                  | 0.0004  | 0.0000  | -0.0059 | 0.0545  |
|      |                        | -0.2444                                  | 0.0365  | 0.0012  | 0.0000  | -0.0031 |
|      |                        | -0.0810                                  | 0.0853  | 0.0108  | 0.0008  | 0.0000  |
|      |                        | -0.0112                                  | 0.1612  | 0.3609  | 0.0371  | -0.0001 |
|      |                        | 0.0000                                   | -0.0061 | 0.0501  | -0.0261 | 0.0045  |
|      |                        | -0.0009                                  | 0.0000  | -0.0013 | -0.0860 | -0.2614 |
|      |                        | -0.0076                                  | -0.0005 |         |         |         |
| 807. | (0.00058) RY*(12)Ru 52 | s( 6.30%)p10.69( 67.33%)d 4.18( 26.37%)  |         |         |         |         |
|      |                        | 0.0000                                   | 0.0000  | 0.0000  | 0.0000  | 0.0087  |
|      |                        | 0.1974                                   | 0.1086  | 0.0633  | -0.0876 | -0.0187 |
|      |                        | 0.0056                                   | -0.0099 | 0.0013  | 0.0003  | -0.0003 |
|      |                        | 0.0000                                   | 0.0025  | -0.0017 | 0.0000  | 0.0000  |
|      |                        | -0.0005                                  | -0.0561 | -0.5867 | 0.2039  | 0.0064  |
|      |                        | -0.0005                                  | 0.0000  | 0.0000  | 0.0000  | 0.0068  |
|      |                        | 0.1591                                   | -0.0449 | -0.0019 | 0.0001  | 0.0000  |
|      |                        | 0.0000                                   | 0.0000  | 0.0701  | 0.4711  | -0.1735 |
|      |                        | 0.0054                                   | -0.0001 | 0.0000  | -0.0029 | -0.0701 |
|      |                        | -0.1107                                  | 0.0506  | 0.0002  | 0.0000  | -0.0019 |
|      |                        | -0.1168                                  | -0.1763 | 0.0340  | 0.0001  | 0.0000  |
|      |                        | 0.0058                                   | -0.0575 | -0.3785 | 0.0010  | -0.0012 |
|      |                        | 0.0000                                   | -0.0003 | 0.0623  | 0.0188  | -0.0083 |
|      |                        | -0.0006                                  | 0.0000  | -0.0025 | -0.0081 | 0.2168  |
|      |                        | 0.0067                                   | 0.0011  |         |         |         |
| 808. | (0.00039) RY*(13)Ru 52 | s( 68.78%)p 0.12( 8.38%)d 0.33( 22.84%)  |         |         |         |         |
|      |                        | 0.0000                                   | 0.0000  | 0.0000  | 0.0000  | 0.0098  |
|      |                        | 0.0326                                   | 0.2611  | 0.7859  | 0.0215  | -0.0167 |
|      |                        | 0.0025                                   | 0.0046  | -0.0017 | -0.0012 | 0.0003  |
|      |                        | 0.0000                                   | -0.0018 | 0.0015  | 0.0000  | 0.0000  |
|      |                        | 0.0000                                   | 0.0152  | 0.0918  | 0.0969  | 0.0067  |
|      |                        | -0.0004                                  | 0.0000  | 0.0000  | 0.0000  | -0.0252 |
|      |                        | -0.1905                                  | -0.0468 | -0.0146 | 0.0003  | 0.0000  |
|      |                        | 0.0000                                   | 0.0000  | 0.0330  | 0.1589  | 0.0068  |
|      |                        | -0.0024                                  | 0.0005  | 0.0000  | 0.0022  | -0.0132 |
|      |                        | -0.2631                                  | 0.0159  | -0.0010 | 0.0000  | -0.0023 |
|      |                        | 0.0265                                   | -0.1110 | 0.0040  | 0.0000  | 0.0000  |
|      |                        | 0.0047                                   | -0.0568 | 0.2448  | 0.0304  | -0.0021 |



|      |           |              |                                          |         |         |         |         |
|------|-----------|--------------|------------------------------------------|---------|---------|---------|---------|
|      |           |              | 0.0000                                   | 0.0045  | 0.0217  | -0.1274 | 0.0026  |
|      |           |              | -0.0012                                  | 0.0000  | 0.0013  | 0.0842  | -0.2398 |
|      |           |              | -0.0168                                  | 0.0009  |         |         |         |
| 809. | (0.00025) | RY*(14)Ru 52 | s( 2.98%)p 7.54( 22.46%)d25.03( 74.56%)  |         |         |         |         |
|      |           |              | 0.0000                                   | 0.0000  | 0.0000  | 0.0000  | 0.0024  |
|      |           |              | -0.0519                                  | 0.1439  | 0.0454  | -0.0335 | 0.0499  |
|      |           |              | 0.0251                                   | -0.0088 | 0.0012  | 0.0012  | -0.0001 |
|      |           |              | 0.0000                                   | 0.0004  | -0.0003 | 0.0000  | 0.0000  |
|      |           |              | 0.0000                                   | -0.0294 | 0.0423  | 0.1833  | -0.0010 |
|      |           |              | 0.0003                                   | 0.0000  | 0.0000  | 0.0000  | -0.0050 |
|      |           |              | -0.1292                                  | -0.0881 | 0.0018  | 0.0001  | 0.0000  |
|      |           |              | 0.0000                                   | 0.0000  | -0.0266 | -0.3899 | -0.1054 |
|      |           |              | -0.0002                                  | -0.0001 | 0.0000  | 0.0026  | -0.0494 |
|      |           |              | 0.0570                                   | 0.0201  | 0.0002  | 0.0000  | 0.0033  |
|      |           |              | -0.0575                                  | -0.0683 | 0.0089  | 0.0016  | 0.0000  |
|      |           |              | -0.0052                                  | 0.0186  | -0.1704 | 0.0181  | -0.0008 |
|      |           |              | 0.0000                                   | -0.0018 | 0.0310  | -0.7260 | 0.0009  |
|      |           |              | -0.0011                                  | 0.0000  | -0.0001 | 0.0076  | 0.4162  |
|      |           |              | 0.0204                                   | -0.0021 |         |         |         |
| 810. | (0.00024) | RY*(15)Ru 52 | s( 21.50%)p 1.05( 22.63%)d 2.60( 55.87%) |         |         |         |         |
|      |           |              | 0.0000                                   | 0.0000  | 0.0000  | 0.0000  | -0.0049 |
|      |           |              | -0.0622                                  | -0.1962 | 0.4014  | -0.0914 | -0.0282 |
|      |           |              | -0.0451                                  | 0.0170  | -0.0014 | 0.0000  | 0.0002  |
|      |           |              | 0.0000                                   | -0.0034 | 0.0019  | 0.0000  | 0.0000  |
|      |           |              | 0.0000                                   | 0.0302  | -0.0668 | -0.2983 | -0.0116 |
|      |           |              | 0.0006                                   | 0.0000  | 0.0000  | 0.0000  | -0.0155 |
|      |           |              | 0.0388                                   | -0.0420 | 0.0128  | -0.0004 | 0.0000  |
|      |           |              | 0.0000                                   | 0.0000  | -0.0871 | -0.2346 | 0.2559  |
|      |           |              | 0.0039                                   | -0.0001 | 0.0000  | -0.0023 | 0.0107  |
|      |           |              | 0.2824                                   | -0.0017 | 0.0002  | 0.0000  | 0.0010  |
|      |           |              | 0.0333                                   | -0.0736 | -0.0292 | -0.0015 | 0.0000  |
|      |           |              | -0.0048                                  | 0.0150  | -0.6479 | 0.0730  | -0.0003 |
|      |           |              | 0.0000                                   | -0.0012 | -0.0242 | 0.0656  | 0.0296  |
|      |           |              | 0.0005                                   | 0.0000  | 0.0028  | 0.0152  | -0.1980 |
|      |           |              | -0.0288                                  | -0.0020 |         |         |         |
| 811. | (0.00018) | RY*(16)Ru 52 | s( 17.08%)p 1.51( 25.83%)d 3.34( 57.08%) |         |         |         |         |
|      |           |              | 0.0000                                   | 0.0000  | 0.0000  | 0.0000  | 0.0078  |
|      |           |              | 0.0125                                   | 0.3888  | -0.0967 | -0.0636 | -0.0755 |
|      |           |              | -0.0138                                  | 0.0098  | -0.0025 | -0.0015 | -0.0005 |
|      |           |              | 0.0000                                   | -0.0039 | 0.0021  | 0.0000  | 0.0000  |
|      |           |              | 0.0000                                   | 0.0324  | 0.1233  | 0.0723  | -0.0043 |
|      |           |              | 0.0000                                   | 0.0000  | 0.0000  | 0.0000  | 0.0488  |
|      |           |              | -0.0755                                  | 0.2892  | -0.0208 | 0.0010  | 0.0000  |
|      |           |              | 0.0000                                   | 0.0000  | 0.0854  | 0.3667  | 0.0534  |
|      |           |              | 0.0052                                   | 0.0003  | 0.0000  | 0.0081  | -0.0545 |
|      |           |              | 0.5219                                   | -0.0146 | 0.0003  | 0.0000  | 0.0075  |
|      |           |              | -0.0195                                  | 0.3726  | -0.0147 | -0.0001 | 0.0000  |
|      |           |              | 0.0045                                   | -0.0412 | -0.1220 | -0.0291 | 0.0008  |
|      |           |              | 0.0000                                   | -0.0027 | 0.0349  | -0.2516 | 0.0077  |
|      |           |              | -0.0004                                  | 0.0000  | 0.0014  | 0.0525  | -0.2664 |
|      |           |              | 0.0026                                   | 0.0007  |         |         |         |
| 812. | (0.00014) | RY*(17)Ru 52 | s( 17.04%)p 0.38( 6.50%)d 4.49( 76.46%)  |         |         |         |         |
|      |           |              | 0.0000                                   | 0.0000  | 0.0000  | 0.0000  | 0.0024  |
|      |           |              | -0.0684                                  | -0.0397 | 0.3882  | 0.1154  | -0.0061 |
|      |           |              | -0.0001                                  | -0.0075 | 0.0028  | 0.0026  | 0.0000  |
|      |           |              | 0.0000                                   | 0.0019  | -0.0029 | 0.0000  | 0.0000  |
|      |           |              | 0.0000                                   | -0.0334 | 0.0653  | -0.0666 | -0.0028 |
|      |           |              | 0.0000                                   | 0.0000  | 0.0000  | 0.0000  | -0.0769 |
|      |           |              | 0.1838                                   | 0.0013  | 0.0105  | -0.0011 | 0.0000  |
|      |           |              | 0.0000                                   | 0.0000  | -0.0071 | 0.0203  | -0.1223 |
|      |           |              | 0.0027                                   | -0.0002 | 0.0000  | 0.0099  | -0.0858 |
|      |           |              | 0.1493                                   | -0.0521 | -0.0002 | 0.0000  | 0.0034  |
|      |           |              | -0.1046                                  | 0.5735  | -0.0404 | -0.0005 | 0.0000  |
|      |           |              | 0.0006                                   | 0.0711  | 0.0710  | -0.0222 | 0.0012  |
|      |           |              | 0.0000                                   | -0.0081 | 0.0519  | 0.2531  | 0.0260  |
|      |           |              | 0.0001                                   | 0.0000  | -0.0067 | -0.0695 | 0.5546  |
|      |           |              | 0.0097                                   | -0.0007 |         |         |         |
| 813. | (0.00010) | RY*(18)Ru 52 | s( 17.07%)p 1.04( 17.77%)d 3.82( 65.16%) |         |         |         |         |
|      |           |              | 0.0000                                   | 0.0000  | 0.0000  | 0.0000  | 0.0009  |
|      |           |              | -0.0760                                  | 0.2881  | -0.1389 | 0.1636  | -0.1887 |
|      |           |              | -0.0069                                  | -0.0127 | 0.0025  | 0.0021  | -0.0003 |
|      |           |              | 0.0000                                   | 0.0029  | -0.0058 | 0.0000  | 0.0000  |
|      |           |              | 0.0000                                   | -0.0374 | -0.1768 | -0.1566 | 0.0240  |
|      |           |              | -0.0016                                  | 0.0000  | 0.0000  | 0.0000  | 0.0420  |
|      |           |              | -0.2069                                  | -0.0214 | -0.0070 | 0.0004  | 0.0000  |
|      |           |              | 0.0000                                   | 0.0000  | -0.0594 | -0.2192 | -0.1523 |
|      |           |              | 0.0075                                   | -0.0003 | 0.0000  | 0.0003  | 0.0423  |
|      |           |              | -0.5253                                  | 0.0351  | 0.0004  | 0.0000  | -0.0044 |
|      |           |              | -0.0782                                  | 0.4800  | -0.0370 | 0.0011  | 0.0000  |
|      |           |              | -0.0047                                  | 0.0015  | -0.2882 | 0.0421  | -0.0032 |
|      |           |              | 0.0000                                   | 0.0011  | -0.0089 | 0.0261  | 0.0179  |
|      |           |              | -0.0004                                  | 0.0000  | 0.0005  | -0.0269 | -0.2193 |
|      |           |              | 0.0074                                   | 0.0002  |         |         |         |
| 814. | (0.00006) | RY*(19)Ru 52 | s( 31.07%)p 1.00( 31.10%)d 1.22( 37.83%) |         |         |         |         |
| 815. | (0.00003) | RY*(20)Ru 52 | s( 83.77%)p 0.10( 8.69%)d 0.09( 7.54%)   |         |         |         |         |
| 816. | (0.00001) | RY*(21)Ru 52 | s( 2.74%)p30.76( 84.29%)d 4.73( 12.97%)  |         |         |         |         |
| 817. | (0.00002) | RY*(22)Ru 52 | s( 11.99%)p 6.52( 78.11%)d 0.83( 9.90%)  |         |         |         |         |
| 818. | (0.00001) | RY*(23)Ru 52 | s( 9.09%)p 7.66( 69.65%)d 2.34( 21.26%)  |         |         |         |         |
| 819. | (0.00000) | RY*(24)Ru 52 | s(100.00%)                               |         |         |         |         |
| 820. | (0.00000) | RY*(25)Ru 52 | s( 99.97%)p 0.00( 0.02%)d 0.00( 0.01%)   |         |         |         |         |
| 821. | (0.00000) | RY*(26)Ru 52 | s( 99.94%)p 0.00( 0.05%)d 0.00( 0.01%)   |         |         |         |         |
| 822. | (0.00000) | RY*(27)Ru 52 | s( 0.01%)p99.99( 99.97%)d 1.64( 0.02%)   |         |         |         |         |
| 823. | (0.00000) | RY*(28)Ru 52 | s( 0.00%)p 1.00(100.00%)d 0.00( 0.00%)   |         |         |         |         |
| 824. | (0.00001) | RY*(29)Ru 52 | s( 93.53%)p 0.02( 2.00%)d 0.05( 4.47%)   |         |         |         |         |
| 825. | (0.00000) | RY*(30)Ru 52 | s( 96.86%)p 0.03( 2.65%)d 0.01( 0.49%)   |         |         |         |         |
| 826. | (0.00000) | RY*(31)Ru 52 | s( 0.20%)p13.80( 2.70%)d99.99( 97.10%)   |         |         |         |         |
| 827. | (0.00000) | RY*(32)Ru 52 | s( 0.00%)p 1.00( 0.01%)d99.99( 99.99%)   |         |         |         |         |
| 828. | (0.00000) | RY*(33)Ru 52 | s( 99.51%)p 0.00( 0.33%)d 0.00( 0.17%)   |         |         |         |         |
| 829. | (0.00000) | RY*(34)Ru 52 | s( 0.01%)p 1.00( 99.93%)d 0.00( 0.06%)   |         |         |         |         |
| 830. | (0.00000) | RY*(35)Ru 52 | s( 0.08%)p18.78( 1.51%)d99.99( 98.41%)   |         |         |         |         |
| 831. | (0.00000) | RY*(36)Ru 52 | s( 0.00%)p 0.00( 0.00%)d 1.00(100.00%)   |         |         |         |         |
| 832. | (0.00000) | RY*(37)Ru 52 | s( 0.00%)p 1.00(100.00%)d 0.00( 0.00%)   |         |         |         |         |
| 833. | (0.00000) | RY*(38)Ru 52 | s( 99.98%)p 0.00( 0.01%)d 0.00( 0.01%)   |         |         |         |         |
| 834. | (0.00000) | RY*(39)Ru 52 | s( 0.38%)p 6.67( 2.53%)d99.99( 97.09%)   |         |         |         |         |
| 835. | (0.00000) | RY*(40)Ru 52 | s( 0.00%)p 1.00( 0.02%)d99.99( 99.98%)   |         |         |         |         |
| 836. | (0.00000) | RY*(41)Ru 52 | s( 99.98%)p 0.00( 0.02%)d 0.00( 0.00%)   |         |         |         |         |
| 837. | (0.00000) | RY*(42)Ru 52 | s(100.00%)p 0.00( 0.00%)d 0.00( 0.00%)   |         |         |         |         |
| 838. | (0.00000) | RY*(43)Ru 52 | s( 0.11%)p12.43( 1.38%)d99.99( 98.51%)   |         |         |         |         |
| 839. | (0.00000) | RY*(44)Ru 52 | s( 0.00%)p 0.00( 0.01%)d 1.00( 99.99%)   |         |         |         |         |
| 840. | (0.00000) | RY*(45)Ru 52 | s( 0.06%)p99.99( 99.83%)d 1.65( 0.10%)   |         |         |         |         |
| 841. | (0.00000) | RY*(46)Ru 52 | s( 0.00%)p 1.00(100.00%)d 0.00( 0.00%)   |         |         |         |         |
| 842. | (0.00000) | RY*(47)Ru 52 | s( 0.08%)p 7.33( 0.57%)d99.99( 99.36%)   |         |         |         |         |
| 843. | (0.00000) | RY*(48)Ru 52 | s( 0.00%)p 1.00( 0.01%)d99.99( 99.99%)   |         |         |         |         |
| 844. | (0.00413) | RY*( 1)Cl 53 | s( 0.04%)p99.99( 82.27%)d99.99( 17.69%)  |         |         |         |         |
|      |           |              | 0.0000                                   | 0.0000  | -0.0003 | 0.0194  | -0.0032 |
|      |           |              | -0.0006                                  | -0.0003 | 0.0000  | 0.0000  | -0.0052 |



|      |           |                    |                                         |         |         |         |         |         |  |
|------|-----------|--------------------|-----------------------------------------|---------|---------|---------|---------|---------|--|
|      |           |                    |                                         | 0.0075  | -0.0035 | -0.7540 | 0.0169  | 0.0005  |  |
|      |           |                    |                                         | 0.0005  | 0.0032  | 0.0183  | 0.0030  | -0.0238 |  |
|      | ( 50.06%) | -0.7076* C 21      | s( 34.98%)p 1.86( 64.93%)d 0.00( 0.09%) | 0.0000  | -0.5914 | -0.0054 | -0.0039 | -0.0001 |  |
|      |           |                    |                                         | 0.0000  | -0.0443 | -0.0154 | 0.0027  | -0.2956 |  |
|      |           |                    |                                         | 0.0168  | -0.0002 | 0.7479  | -0.0100 | -0.0039 |  |
|      |           |                    |                                         | -0.0008 | 0.0057  | 0.0161  | 0.0022  | -0.0244 |  |
| 868. | (0.01313) | BD*( 1) C 14- H 31 |                                         |         |         |         |         |         |  |
|      | ( 38.35%) | 0.6193* C 14       | s( 30.05%)p 2.33( 69.88%)d 0.00( 0.07%) | -0.0004 | 0.5481  | -0.0050 | -0.0080 | 0.0003  |  |
|      |           |                    |                                         | -0.0002 | -0.5344 | -0.0075 | 0.0009  | 0.5634  |  |
|      |           |                    |                                         | 0.0036  | -0.0050 | -0.3094 | -0.0025 | 0.0047  |  |
|      |           |                    |                                         | -0.0190 | 0.0111  | -0.0120 | -0.0014 | -0.0070 |  |
|      | ( 61.65%) | -0.7852* H 31      | s( 99.95%)p 0.00( 0.05%)                | 0.9997  | 0.0018  | -0.0004 | 0.0136  | -0.0161 |  |
|      |           |                    |                                         | 0.0077  |         |         |         |         |  |
| 869. | (0.01316) | BD*( 1) C 25- C 26 |                                         |         |         |         |         |         |  |
|      | ( 49.62%) | 0.7044* C 25       | s( 36.16%)p 1.76( 63.75%)d 0.00( 0.09%) | 0.0000  | -0.6012 | -0.0125 | -0.0033 | -0.0001 |  |
|      |           |                    |                                         | 0.0000  | -0.5311 | -0.0003 | 0.0015  | 0.5665  |  |
|      |           |                    |                                         | -0.0091 | 0.0005  | -0.1842 | 0.0208  | -0.0040 |  |
|      |           |                    |                                         | 0.0256  | -0.0049 | 0.0071  | 0.0005  | 0.0116  |  |
|      | ( 50.38%) | -0.7098* C 26      | s( 35.56%)p 1.81( 64.35%)d 0.00( 0.09%) | 0.0000  | -0.5963 | -0.0064 | -0.0037 | -0.0001 |  |
|      |           |                    |                                         | 0.0001  | 0.5466  | -0.0211 | -0.0025 | -0.5691 |  |
|      |           |                    |                                         | 0.0131  | 0.0037  | 0.1413  | 0.0148  | -0.0034 |  |
|      |           |                    |                                         | 0.0255  | -0.0071 | 0.0092  | 0.0017  | 0.0115  |  |
| 870. | (0.31736) | BD*( 2) C 25- C 26 |                                         |         |         |         |         |         |  |
|      | ( 51.09%) | 0.7148* C 25       | s( 0.00%)p 1.00( 99.97%)d 0.00( 0.03%)  | 0.0000  | -0.0015 | 0.0016  | -0.0001 | 0.0000  |  |
|      |           |                    |                                         | -0.0001 | 0.6454  | 0.0102  | 0.0060  | 0.7014  |  |
|      |           |                    |                                         | 0.0115  | 0.0071  | 0.3014  | 0.0048  | 0.0031  |  |
|      |           |                    |                                         | 0.0015  | 0.0023  | -0.0047 | 0.0150  | -0.0007 |  |
|      | ( 48.91%) | -0.6994* C 26      | s( 0.00%)p 1.00( 99.97%)d 0.00( 0.03%)  | 0.0000  | -0.0012 | 0.0012  | -0.0001 | 0.0000  |  |
|      |           |                    |                                         | 0.0000  | 0.6481  | 0.0109  | 0.0056  | 0.6986  |  |
|      |           |                    |                                         | 0.0111  | 0.0060  | 0.3020  | 0.0051  | 0.0027  |  |
|      |           |                    |                                         | 0.0017  | -0.0086 | -0.0036 | -0.0121 | -0.0050 |  |
| 871. | (0.01662) | BD*( 1) C 25- H 39 |                                         |         |         |         |         |         |  |
|      | ( 39.77%) | 0.6306* C 25       | s( 28.58%)p 2.50( 71.34%)d 0.00( 0.07%) | -0.0003 | 0.5345  | -0.0034 | -0.0102 | -0.0002 |  |
|      |           |                    |                                         | 0.0001  | -0.5462 | -0.0052 | 0.0067  | 0.2483  |  |
|      |           |                    |                                         | 0.0031  | -0.0051 | 0.5944  | 0.0009  | -0.0020 |  |
|      |           |                    |                                         | -0.0093 | -0.0210 | 0.0097  | 0.0077  | 0.0062  |  |
|      | ( 60.23%) | -0.7761* H 39      | s( 99.94%)p 0.00( 0.06%)                | 0.9997  | 0.0022  | 0.0002  | 0.0129  | -0.0045 |  |
|      |           |                    |                                         | -0.0198 |         |         |         |         |  |
| 872. | (0.01445) | BD*( 1) C 26- H 40 |                                         |         |         |         |         |         |  |
|      | ( 39.08%) | 0.6251* C 26       | s( 29.12%)p 2.43( 70.80%)d 0.00( 0.08%) | 0.0004  | -0.5395 | 0.0090  | 0.0073  | 0.0001  |  |
|      |           |                    |                                         | -0.0001 | -0.0243 | 0.0001  | -0.0010 | 0.3518  |  |
|      |           |                    |                                         | 0.0043  | -0.0006 | -0.7639 | -0.0091 | 0.0038  |  |
|      |           |                    |                                         | -0.0008 | -0.0014 | 0.0180  | 0.0043  | -0.0206 |  |
|      | ( 60.92%) | -0.7805* H 40      | s( 99.96%)p 0.00( 0.04%)                | -0.9998 | -0.0022 | -0.0005 | 0.0011  | -0.0081 |  |
|      |           |                    |                                         | 0.0174  |         |         |         |         |  |
| 873. | (0.01279) | BD*( 1) C 3- C 5   |                                         |         |         |         |         |         |  |
|      | ( 50.29%) | 0.7091* C 3        | s( 35.51%)p 1.81( 64.40%)d 0.00( 0.09%) | 0.0000  | 0.5958  | 0.0058  | 0.0039  | 0.0001  |  |
|      |           |                    |                                         | -0.0001 | 0.0041  | -0.0199 | 0.0023  | 0.5453  |  |
|      |           |                    |                                         | -0.0124 | -0.0038 | 0.5881  | -0.0122 | -0.0040 |  |
|      |           |                    |                                         | -0.0019 | -0.0023 | 0.0269  | -0.0109 | 0.0086  |  |
|      | ( 49.71%) | -0.7051* C 5       | s( 35.94%)p 1.78( 63.97%)d 0.00( 0.09%) | 0.0000  | 0.5993  | 0.0130  | 0.0032  | 0.0001  |  |
|      |           |                    |                                         | -0.0001 | 0.0386  | -0.0207 | 0.0048  | -0.5478 |  |
|      |           |                    |                                         | 0.0065  | 0.0004  | -0.5811 | 0.0080  | 0.0003  |  |
|      |           |                    |                                         | 0.0012  | 0.0008  | 0.0271  | -0.0104 | 0.0079  |  |
| 874. | (0.28773) | BD*( 2) C 3- C 5   |                                         |         |         |         |         |         |  |
|      | ( 52.05%) | 0.7215* C 3        | s( 0.00%)p 1.00( 99.96%)d 0.00( 0.04%)  | 0.0000  | -0.0009 | 0.0009  | -0.0002 | 0.0000  |  |
|      |           |                    |                                         | 0.0000  | 0.0321  | 0.0004  | 0.0003  | -0.7323 |  |
|      |           |                    |                                         | -0.0099 | -0.0071 | 0.6797  | 0.0085  | 0.0060  |  |
|      |           |                    |                                         | 0.0079  | -0.0065 | -0.0012 | 0.0083  | 0.0153  |  |
|      | ( 47.95%) | -0.6925* C 5       | s( 0.00%)p 1.00( 99.97%)d 0.00( 0.03%)  | 0.0000  | -0.0019 | 0.0009  | -0.0002 | -0.0001 |  |
|      |           |                    |                                         | -0.0001 | 0.0336  | 0.0009  | 0.0007  | -0.7269 |  |
|      |           |                    |                                         | -0.0074 | -0.0069 | 0.6856  | 0.0076  | 0.0066  |  |
|      |           |                    |                                         | 0.0075  | -0.0077 | 0.0010  | -0.0080 | -0.0126 |  |
| 875. | (0.01463) | BD*( 1) C 3- H 41  |                                         |         |         |         |         |         |  |
|      | ( 38.65%) | 0.6217* C 3        | s( 29.33%)p 2.41( 70.59%)d 0.00( 0.08%) | 0.0003  | -0.5415 | 0.0088  | 0.0070  | 0.0001  |  |
|      |           |                    |                                         | -0.0001 | -0.7353 | -0.0118 | 0.0017  | 0.2590  |  |
|      |           |                    |                                         | 0.0035  | 0.0000  | 0.3131  | 0.0049  | 0.0000  |  |
|      |           |                    |                                         | 0.0130  | 0.0160  | -0.0044 | -0.0161 | 0.0081  |  |
|      | ( 61.35%) | -0.7832* H 41      | s( 99.96%)p 0.00( 0.04%)                | -0.9998 | -0.0022 | -0.0002 | 0.0166  | -0.0062 |  |
|      |           |                    |                                         | -0.0069 |         |         |         |         |  |
| 876. | (0.03150) | BD*( 1) C 5- C 7   |                                         |         |         |         |         |         |  |
|      | ( 50.30%) | 0.7092* C 5        | s( 34.43%)p 1.90( 65.48%)d 0.00( 0.09%) | 0.0000  | 0.5867  | -0.0070 | 0.0069  | 0.0002  |  |
|      |           |                    |                                         | -0.0002 | -0.6994 | 0.0067  | 0.0042  | 0.2606  |  |
|      |           |                    |                                         | -0.0082 | -0.0001 | 0.3122  | -0.0096 | -0.0002 |  |
|      |           |                    |                                         | -0.0130 | -0.0159 | 0.0065  | 0.0193  | -0.0099 |  |
|      | ( 49.70%) | -0.7050* C 7       | s( 35.53%)p 1.81( 64.41%)d 0.00( 0.07%) | -0.0002 | 0.5961  | 0.0000  | -0.0024 | 0.0001  |  |
|      |           |                    |                                         | 0.0000  | 0.7089  | -0.0063 | 0.0023  | -0.2388 |  |
|      |           |                    |                                         | 0.0119  | 0.0000  | -0.2901 | 0.0140  | -0.0001 |  |
|      |           |                    |                                         | -0.0127 | -0.0152 | 0.0044  | 0.0140  | -0.0068 |  |
| 877. | (0.01528) | BD*( 1) C 5- H 28  |                                         |         |         |         |         |         |  |
|      | ( 38.85%) | 0.6233* C 5        | s( 29.59%)p 2.38( 70.34%)d 0.00( 0.07%) | 0.0004  | -0.5439 | 0.0033  | 0.0092  | 0.0002  |  |
|      |           |                    |                                         | -0.0002 | -0.7121 | -0.0040 | 0.0036  | -0.3203 |  |
|      |           |                    |                                         | -0.0025 | 0.0058  | -0.3062 | -0.0025 | 0.0061  |  |
|      |           |                    |                                         | -0.0149 | -0.0139 | -0.0071 | -0.0124 | 0.0075  |  |
|      | ( 61.15%) | -0.7820* H 28      | s( 99.94%)p 0.00( 0.06%)                | -0.9997 | -0.0021 | -0.0002 | 0.0215  | 0.0084  |  |
|      |           |                    |                                         | 0.0077  |         |         |         |         |  |
| 878. | (0.24546) | BD*( 1) C 8- O 47  |                                         |         |         |         |         |         |  |
|      | ( 74.91%) | 0.8655* C 8        | s( 0.15%)p99.99( 99.61%)d 1.53( 0.23%)  | 0.0000  | -0.0382 | -0.0081 | -0.0009 | 0.0003  |  |
|      |           |                    |                                         | 0.0002  | 0.3206  | -0.0025 | -0.0018 | -0.6404 |  |
|      |           |                    |                                         | 0.0067  | 0.0103  | 0.6950  | -0.0086 | -0.0067 |  |
|      |           |                    |                                         | 0.0081  | -0.0254 | -0.0074 | -0.0299 | -0.0261 |  |
|      | ( 25.09%) | -0.5009* O 47      | s( 0.21%)p99.99( 99.40%)d 1.87( 0.39%)  | 0.0000  | -0.0456 | 0.0019  | 0.0000  | -0.0001 |  |
|      |           |                    |                                         | 0.0000  | 0.2548  | 0.0015  | 0.0006  | -0.7199 |  |

|      |           |           |             |                |                 |               |         |         |
|------|-----------|-----------|-------------|----------------|-----------------|---------------|---------|---------|
|      |           |           |             | 0.0014         | -0.0004         | 0.6409        | 0.0010  | 0.0010  |
|      |           |           |             | -0.0158        | 0.0286          | 0.0060        | 0.0404  | 0.0340  |
| 879. | (0.18542) | BD* (2) C | 8- O 47     |                |                 |               |         |         |
|      | (74.32%)  |           | 0.8621* C   | 8 s( 0.01%)p   | 1.00( 99.77%)d  | 0.00( 0.22%)  |         |         |
|      |           |           |             | 0.0000         | 0.0072          | 0.0036        | -0.0007 | 0.0001  |
|      |           |           |             | 0.0000         | 0.7647          | -0.0057       | -0.0099 | -0.2569 |
|      |           |           |             | 0.0003         | 0.0023          | -0.5889       | 0.0054  | 0.0068  |
|      |           |           |             | -0.0178        | -0.0013         | 0.0245        | -0.0282 | 0.0222  |
|      | (25.68%)  |           | -0.5068* O  | 47 s( 0.01%)p  | 99.99( 99.60%)d | 29.53( 0.39%) |         |         |
|      |           |           |             | 0.0000         | 0.0115          | -0.0005       | 0.0000  | 0.0000  |
|      |           |           |             | 0.0000         | 0.7803          | -0.0006       | 0.0009  | -0.2368 |
|      |           |           |             | -0.0002        | -0.0003         | -0.5753       | 0.0003  | -0.0007 |
|      |           |           |             | 0.0257         | 0.0019          | -0.0310       | 0.0378  | -0.0289 |
| 880. | (0.01440) | BD* (3) C | 8- O 47     |                |                 |               |         |         |
|      | (68.08%)  |           | 0.8251* C   | 8 s( 39.04%)p  | 1.56( 60.90%)d  | 0.00( 0.06%)  |         |         |
|      |           |           |             | -0.0001        | 0.6097          | 0.1362        | -0.0011 | -0.0005 |
|      |           |           |             | -0.0005        | -0.4299         | 0.0223        | -0.0155 | -0.5770 |
|      |           |           |             | 0.0264         | -0.0180         | -0.2983       | 0.0199  | -0.0124 |
|      |           |           |             | 0.0170         | 0.0090          | 0.0127        | -0.0051 | -0.0067 |
|      | (31.92%)  |           | -0.5650* O  | 47 s( 42.48%)p | 1.34( 56.75%)d  | 0.02( 0.77%)  |         |         |
|      |           |           |             | 0.0001         | 0.6513          | -0.0236       | -0.0025 | 0.0001  |
|      |           |           |             | 0.0000         | 0.4295          | -0.0173       | -0.0036 | 0.4688  |
|      |           |           |             | -0.0212        | -0.0045         | 0.4028        | -0.0143 | -0.0029 |
|      |           |           |             | 0.0573         | 0.0415          | 0.0491        | -0.0093 | -0.0134 |
| 881. | (0.34598) | BD* (1) C | 8-Ru 52     |                |                 |               |         |         |
|      | (33.41%)  |           | 0.5780* C   | 8 s( 62.09%)p  | 0.61( 37.90%)d  | 0.00( 0.01%)  |         |         |
|      |           |           |             | -0.0001        | -0.7873         | 0.0332        | -0.0003 | -0.0001 |
|      |           |           |             | -0.0003        | -0.3475         | -0.0211       | -0.0043 | -0.4258 |
|      |           |           |             | -0.0295        | -0.0057         | -0.2747       | -0.0114 | -0.0016 |
|      |           |           |             | -0.0065        | -0.0025         | -0.0054       | 0.0018  | 0.0041  |
|      | (66.59%)  |           | -0.8160* Ru | 52 s( 35.82%)p | 0.00( 0.09%)d   | 1.79( 64.09%) |         |         |
|      |           |           |             | 0.0000         | 0.0000          | 0.0001        | 0.0009  | -0.5980 |
|      |           |           |             | -0.0230        | 0.0082          | 0.0024        | -0.0004 | -0.0002 |
|      |           |           |             | 0.0008         | -0.0004         | 0.0001        | 0.0001  | 0.0000  |
|      |           |           |             | 0.0000         | 0.0001          | -0.0001       | 0.0000  | 0.0000  |
|      |           |           |             | -0.0005        | -0.0003         | 0.0084        | -0.0016 | -0.0004 |
|      |           |           |             | 0.0000         | 0.0000          | 0.0000        | -0.0007 | -0.0042 |
|      |           |           |             | 0.0053         | -0.0130         | -0.0003       | 0.0000  | 0.0000  |
|      |           |           |             | 0.0000         | -0.0006         | 0.0186        | 0.0161  | 0.0000  |
|      |           |           |             | -0.0003        | 0.0000          | 0.0000        | -0.5358 | -0.0240 |
|      |           |           |             | 0.0034         | -0.0021         | -0.0001       | 0.0000  | -0.4049 |
|      |           |           |             | -0.0236        | 0.0041          | -0.0016       | -0.0001 | 0.0000  |
|      |           |           |             | -0.4144        | -0.0184         | 0.0014        | -0.0009 | -0.0001 |
|      |           |           |             | 0.0000         | 0.0764          | 0.0042        | -0.0048 | 0.0005  |
|      |           |           |             | 0.0000         | 0.0000          | 0.1033        | 0.0077  | 0.0009  |
|      |           |           |             | 0.0000         | 0.0000          |               |         |         |
| 882. | (0.32004) | BD* (1) C | 6-Ru 52     |                |                 |               |         |         |
|      | (31.80%)  |           | 0.5639* C   | 6 s( 62.92%)p  | 0.59( 37.08%)d  | 0.00( 0.01%)  |         |         |
|      |           |           |             | -0.0001        | -0.7923         | 0.0385        | -0.0017 | -0.0002 |
|      |           |           |             | -0.0003        | 0.4763          | 0.0313        | 0.0064  | -0.3070 |
|      |           |           |             | -0.0175        | -0.0042         | -0.2197       | -0.0105 | -0.0017 |
|      |           |           |             | 0.0055         | 0.0042          | -0.0028       | -0.0038 | 0.0027  |
|      | (68.20%)  |           | -0.8258* Ru | 52 s( 36.90%)p | 0.00( 0.06%)d   | 1.71( 63.03%) |         |         |
|      |           |           |             | 0.0000         | 0.0000          | 0.0000        | 0.0009  | -0.6070 |
|      |           |           |             | -0.0232        | 0.0047          | 0.0026        | 0.0001  | -0.0009 |
|      |           |           |             | 0.0000         | -0.0002         | 0.0000        | 0.0000  | 0.0000  |
|      |           |           |             | 0.0000         | 0.0001          | -0.0001       | 0.0000  | 0.0000  |
|      |           |           |             | 0.0005         | 0.0037          | -0.0129       | 0.0061  | 0.0005  |
|      |           |           |             | 0.0000         | 0.0000          | 0.0000        | -0.0006 | -0.0032 |
|      |           |           |             | -0.0002        | -0.0139         | 0.0000        | 0.0000  | 0.0000  |
|      |           |           |             | 0.0000         | -0.0003         | 0.0096        | 0.0115  | -0.0016 |
|      |           |           |             | -0.0003        | 0.0000          | 0.0000        | 0.4639  | 0.0164  |
|      |           |           |             | -0.0045        | 0.0016          | 0.0001        | 0.0000  | 0.4796  |
|      |           |           |             | 0.0153         | -0.0019         | 0.0012        | 0.0001  | 0.0000  |
|      |           |           |             | -0.2184        | -0.0249         | 0.0019        | -0.0001 | -0.0001 |
|      |           |           |             | 0.0000         | -0.3402         | -0.0229       | -0.0009 | -0.0007 |
|      |           |           |             | -0.0001        | 0.0000          | 0.1413        | 0.0068  | 0.0007  |
|      |           |           |             | 0.0003         | 0.0001          |               |         |         |
| 883. | (0.19883) | BD* (1) C | 6- O 46     |                |                 |               |         |         |
|      | (74.67%)  |           | 0.8641* C   | 6 s( 0.90%)p   | 99.99( 98.87%)d | 0.25( 0.23%)  |         |         |
|      |           |           |             | 0.0000         | 0.0933          | 0.0183        | 0.0003  | -0.0001 |
|      |           |           |             | 0.0000         | 0.5398          | -0.0146       | -0.0039 | 0.0006  |
|      |           |           |             | -0.0043        | -0.0024         | 0.8347        | -0.0090 | -0.0135 |
|      |           |           |             | -0.0128        | 0.0221          | -0.0230       | 0.0183  | -0.0277 |
|      | (25.33%)  |           | -0.5033* O  | 46 s( 0.87%)p  | 99.99( 98.72%)d | 0.47( 0.41%)  |         |         |
|      |           |           |             | 0.0000         | 0.0931          | -0.0032       | -0.0004 | 0.0000  |
|      |           |           |             | 0.0000         | 0.3742          | 0.0009        | 0.0013  | 0.1119  |
|      |           |           |             | -0.0045        | -0.0003         | 0.9136        | -0.0024 | 0.0005  |
|      |           |           |             | 0.0030         | -0.0386         | 0.0330        | -0.0213 | 0.0321  |
| 884. | (0.21822) | BD* (2) C | 6- O 46     |                |                 |               |         |         |
|      | (74.88%)  |           | 0.8653* C   | 6 s( 0.13%)p   | 99.99( 99.64%)d | 1.85( 0.23%)  |         |         |
|      |           |           |             | 0.0000         | 0.0344          | 0.0087        | 0.0010  | -0.0003 |
|      |           |           |             | 0.0000         | 0.4567          | -0.0071       | -0.0061 | 0.8352  |
|      |           |           |             | -0.0045        | -0.0126         | -0.3001       | -0.0040 | 0.0040  |
|      |           |           |             | 0.0193         | -0.0183         | -0.0069       | 0.0382  | 0.0107  |
|      | (25.12%)  |           | -0.5012* O  | 46 s( 0.10%)p  | 99.99( 99.50%)d | 4.07( 0.40%)  |         |         |
|      |           |           |             | 0.0000         | 0.0312          | -0.0015       | -0.0001 | 0.0000  |
|      |           |           |             | 0.0000         | 0.4079          | 0.0011        | 0.0007  | 0.8673  |
|      |           |           |             | -0.0013        | 0.0004          | -0.2766       | -0.0035 | -0.0002 |
|      |           |           |             | -0.0306        | 0.0223          | 0.0122        | -0.0474 | -0.0121 |
| 885. | (0.01855) | BD* (3) C | 6- O 46     |                |                 |               |         |         |
|      | (68.70%)  |           | 0.8289* C   | 6 s( 37.49%)p  | 1.67( 62.45%)d  | 0.00( 0.06%)  |         |         |
|      |           |           |             | -0.0001        | 0.5970          | 0.1361        | -0.0023 | -0.0007 |
|      |           |           |             | -0.0006        | 0.5109          | -0.0246       | 0.0240  | -0.4489 |
|      |           |           |             | 0.0169         | -0.0156         | -0.3998       | 0.0192  | -0.0087 |
|      |           |           |             | -0.0162        | -0.0139         | 0.0120        | 0.0016  | -0.0039 |
|      | (31.30%)  |           | -0.5594* O  | 46 s( 42.62%)p | 1.33( 56.61%)d  | 0.02( 0.76%)  |         |         |
|      |           |           |             | 0.0001         | 0.6524          | -0.0251       | -0.0028 | 0.0001  |
|      |           |           |             | 0.0000         | -0.6540         | 0.0223        | 0.0044  | 0.3347  |
|      |           |           |             | -0.0157        | -0.0033         | 0.1596        | -0.0097 | -0.0023 |
|      |           |           |             | -0.0604        | -0.0390         | 0.0242        | 0.0308  | -0.0303 |
| 886. | (0.01480) | BD* (1) C | 1- C 3      |                |                 |               |         |         |
|      | (50.03%)  |           | 0.7073* C   | 1 s( 35.25%)p  | 1.83( 64.66%)d  | 0.00( 0.09%)  |         |         |
|      |           |           |             | 0.0000         | 0.5936          | 0.0088        | 0.0036  | -0.0002 |
|      |           |           |             | 0.0001         | 0.7075          | -0.0239       | 0.0016  | 0.2800  |
|      |           |           |             | 0.0069         | -0.0036         | -0.2585       | 0.0080  | -0.0039 |
|      |           |           |             | 0.0171         | 0.0161          | 0.0094        | 0.0149  | -0.0088 |
|      | (49.97%)  |           | -0.7069* C  | 3 s( 35.11%)p  | 1.85( 64.80%)d  | 0.00( 0.09%)  |         |         |
|      |           |           |             | 0.0000         | 0.5925          | 0.0056        | 0.0038  | 0.0001  |
|      |           |           |             | 0.0000         | -0.6758         | 0.0014        | 0.0048  | -0.3129 |
|      |           |           |             | 0.0172         | -0.0001         | -0.3044       | 0.0182  | -0.0005 |
|      |           |           |             | 0.0155         | 0.0148          | 0.0072        | 0.0169  | -0.0100 |
| 887. | (0.02264) | BD* (1) C | 1- C 2      |                |                 |               |         |         |
|      | (49.82%)  |           | 0.7058* C   | 1 s( 34.70%)p  | 1.88( 65.21%)d  | 0.00( 0.09%)  |         |         |
|      |           |           |             | 0.0000         | -0.5890         | 0.0011        | -0.0051 | 0.0002  |
|      |           |           |             | -0.0001        | 0.7039          | -0.0245       | -0.0019 | -0.2495 |



|      |           |                    |                                         |         |         |         |         |         |
|------|-----------|--------------------|-----------------------------------------|---------|---------|---------|---------|---------|
|      |           |                    |                                         | 0.0000  | 0.1028  | 0.0183  | -0.0042 | -0.5623 |
|      |           |                    |                                         | 0.0095  | -0.0006 | -0.5572 | 0.0097  | -0.0006 |
|      |           |                    |                                         | 0.0065  | 0.0061  | -0.0257 | 0.0099  | -0.0053 |
|      | ( 50.37%) | -0.7097* C 17      | s( 35.55%)p 1.81( 64.36%)d 0.00( 0.09%) | 0.0000  | -0.5962 | -0.0063 | -0.0038 | -0.0001 |
|      |           |                    |                                         | 0.0001  | -0.1484 | 0.0233  | -0.0017 | 0.5636  |
|      |           |                    |                                         | -0.0126 | -0.0038 | 0.5506  | -0.0117 | -0.0039 |
|      |           |                    |                                         | 0.0046  | 0.0042  | -0.0267 | 0.0114  | -0.0062 |
| 899. | (0.01659) | BD*( 1) C 13- H 30 |                                         |         |         |         |         |         |
|      | ( 39.75%) | 0.6305* C 13       | s( 28.56%)p 2.50( 71.36%)d 0.00( 0.07%) | 0.0003  | -0.5343 | 0.0035  | 0.0101  | 0.0002  |
|      |           |                    |                                         | -0.0001 | -0.7882 | -0.0036 | 0.0050  | 0.2290  |
|      |           |                    |                                         | 0.0028  | -0.0050 | 0.1997  | 0.0041  | -0.0050 |
|      |           |                    |                                         | 0.0123  | 0.0103  | -0.0033 | -0.0182 | 0.0111  |
|      | ( 60.25%) | -0.7762* H 30      | s( 99.94%)p 0.00( 0.06%)                | -0.9997 | -0.0023 | -0.0003 | 0.0235  | -0.0043 |
|      |           |                    |                                         | -0.0021 |         |         |         |         |
| 900. | (0.02089) | BD*( 1) C 11- C 15 |                                         |         |         |         |         |         |
|      | ( 51.97%) | 0.7209* C 11       | s( 37.24%)p 1.68( 62.67%)d 0.00( 0.09%) | -0.0001 | 0.6092  | 0.0352  | -0.0021 | 0.0003  |
|      |           |                    |                                         | 0.0000  | -0.1577 | -0.0174 | -0.0047 | 0.5609  |
|      |           |                    |                                         | 0.0153  | 0.0048  | 0.5352  | 0.0130  | 0.0038  |
|      |           |                    |                                         | -0.0009 | -0.0009 | 0.0272  | -0.0123 | 0.0060  |
|      | ( 48.03%) | -0.6930* C 15      | s( 36.81%)p 1.71( 63.10%)d 0.00( 0.09%) | 0.0001  | 0.6066  | 0.0082  | 0.0016  | 0.0000  |
|      |           |                    |                                         | -0.0004 | 0.0809  | 0.0148  | -0.0024 | -0.5707 |
|      |           |                    |                                         | 0.0093  | 0.0037  | -0.5461 | 0.0101  | 0.0034  |
|      |           |                    |                                         | -0.0063 | -0.0057 | 0.0264  | -0.0116 | 0.0050  |
| 901. | (0.30039) | BD*( 2) C 11- C 15 |                                         |         |         |         |         |         |
|      | ( 54.05%) | 0.7352* C 11       | s( 0.01%)p 1.00( 99.94%)d 0.00( 0.05%)  | 0.0000  | 0.0064  | -0.0030 | 0.0005  | 0.0000  |
|      |           |                    |                                         | 0.0000  | -0.0107 | 0.0050  | -0.0006 | -0.6946 |
|      |           |                    |                                         | -0.0246 | 0.0051  | 0.7176  | 0.0336  | -0.0058 |
|      |           |                    |                                         | -0.0083 | 0.0090  | 0.0010  | 0.0096  | 0.0169  |
|      | ( 45.95%) | -0.6778* C 15      | s( 0.00%)p 1.00( 99.97%)d 0.00( 0.03%)  | -0.0001 | -0.0042 | 0.0001  | 0.0003  | 0.0000  |
|      |           |                    |                                         | 0.0000  | -0.0142 | 0.0005  | 0.0003  | -0.6945 |
|      |           |                    |                                         | 0.0012  | -0.0040 | 0.7191  | -0.0026 | 0.0048  |
|      |           |                    |                                         | -0.0090 | 0.0091  | -0.0006 | -0.0059 | -0.0093 |
| 902. | (0.28627) | BD*( 1) C 11-Ru 51 |                                         |         |         |         |         |         |
|      | ( 40.40%) | 0.6356* C 11       | s( 27.65%)p 2.62( 72.34%)d 0.00( 0.01%) | -0.0001 | 0.5249  | -0.0325 | 0.0025  | -0.0006 |
|      |           |                    |                                         | -0.0002 | -0.6509 | 0.0371  | -0.0030 | -0.3835 |
|      |           |                    |                                         | 0.0394  | -0.0012 | -0.3860 | 0.0292  | 0.0005  |
|      |           |                    |                                         | 0.0053  | 0.0031  | 0.0036  | -0.0005 | -0.0015 |
|      | ( 59.60%) | -0.7720* Ru 51     | s( 26.47%)p 0.00( 0.06%)d 2.78( 73.47%) | 0.0000  | 0.0000  | -0.0001 | 0.0007  | 0.5143  |
|      |           |                    |                                         | 0.0116  | -0.0086 | 0.0010  | 0.0008  | -0.0013 |
|      |           |                    |                                         | 0.0016  | -0.0004 | 0.0001  | 0.0000  | 0.0001  |
|      |           |                    |                                         | 0.0000  | 0.0000  | 0.0000  | 0.0000  | 0.0000  |
|      |           |                    |                                         | -0.0007 | -0.0137 | 0.0053  | -0.0029 | 0.0003  |
|      |           |                    |                                         | 0.0000  | 0.0000  | 0.0000  | -0.0008 | -0.0068 |
|      |           |                    |                                         | 0.0099  | -0.0097 | 0.0002  | 0.0000  | 0.0000  |
|      |           |                    |                                         | 0.0000  | -0.0010 | -0.0027 | 0.0089  | -0.0018 |
|      |           |                    |                                         | 0.0001  | 0.0000  | 0.0001  | 0.6055  | -0.0009 |
|      |           |                    |                                         | -0.0003 | 0.0013  | 0.0000  | 0.0000  | 0.3728  |
|      |           |                    |                                         | 0.0033  | 0.0001  | 0.0010  | 0.0000  | 0.0000  |
|      |           |                    |                                         | 0.4386  | -0.0132 | 0.0017  | 0.0007  | 0.0000  |
|      |           |                    |                                         | 0.0000  | -0.0922 | -0.0051 | 0.0062  | 0.0000  |
|      |           |                    |                                         | 0.0000  | 0.0000  | -0.1673 | 0.0060  | 0.0001  |
|      |           |                    |                                         | -0.0002 | 0.0000  |         |         |         |
| 903. | (0.01534) | BD*( 1) C 17- C 19 |                                         |         |         |         |         |         |
|      | ( 49.80%) | 0.7057* C 17       | s( 35.29%)p 1.83( 64.62%)d 0.00( 0.09%) | 0.0000  | -0.5940 | -0.0051 | -0.0041 | -0.0001 |
|      |           |                    |                                         | 0.0001  | 0.7414  | -0.0083 | -0.0042 | -0.2350 |
|      |           |                    |                                         | 0.0179  | -0.0020 | -0.2017 | 0.0174  | -0.0021 |
|      |           |                    |                                         | 0.0119  | 0.0097  | -0.0041 | -0.0217 | 0.0129  |
|      | ( 50.20%) | -0.7085* C 19      | s( 35.33%)p 1.83( 64.58%)d 0.00( 0.09%) | 0.0000  | -0.5943 | -0.0078 | -0.0033 | 0.0000  |
|      |           |                    |                                         | -0.0001 | -0.7608 | 0.0222  | 0.0015  | 0.1971  |
|      |           |                    |                                         | 0.0098  | -0.0026 | 0.1655  | 0.0103  | -0.0027 |
|      |           |                    |                                         | 0.0136  | 0.0115  | -0.0042 | -0.0208 | 0.0126  |
| 904. | (0.35553) | BD*( 2) C 17- C 19 |                                         |         |         |         |         |         |
|      | ( 48.27%) | 0.6947* C 17       | s( 0.00%)p 1.00( 99.98%)d 0.00( 0.02%)  | 0.0000  | 0.0000  | 0.0010  | -0.0001 | 0.0000  |
|      |           |                    |                                         | 0.0000  | -0.0291 | -0.0002 | -0.0001 | -0.7022 |
|      |           |                    |                                         | -0.0122 | -0.0065 | 0.7110  | 0.0120  | 0.0064  |
|      |           |                    |                                         | 0.0104  | -0.0106 | 0.0005  | -0.0011 | -0.0034 |
|      | ( 51.73%) | -0.7193* C 19      | s( 0.00%)p 1.00( 99.97%)d 0.00( 0.03%)  | 0.0000  | 0.0003  | 0.0007  | -0.0001 | 0.0000  |
|      |           |                    |                                         | 0.0000  | -0.0266 | -0.0006 | -0.0003 | -0.7004 |
|      |           |                    |                                         | -0.0104 | -0.0056 | 0.7128  | 0.0107  | 0.0062  |
|      |           |                    |                                         | -0.0078 | 0.0084  | -0.0005 | -0.0063 | -0.0102 |
| 905. | (0.01446) | BD*( 1) C 17- H 34 |                                         |         |         |         |         |         |
|      | ( 39.10%) | 0.6253* C 17       | s( 29.11%)p 2.43( 70.81%)d 0.00( 0.08%) | 0.0004  | -0.5394 | 0.0090  | 0.0073  | 0.0001  |
|      |           |                    |                                         | -0.0001 | -0.6525 | -0.0079 | 0.0038  | -0.3644 |
|      |           |                    |                                         | -0.0045 | 0.0007  | -0.3865 | -0.0042 | 0.0010  |
|      |           |                    |                                         | -0.0166 | -0.0174 | -0.0083 | -0.0098 | 0.0050  |
|      | ( 60.90%) | -0.7804* H 34      | s( 99.96%)p 0.00( 0.04%)                | -0.9998 | -0.0022 | -0.0005 | 0.0146  | 0.0083  |
|      |           |                    |                                         | 0.0093  |         |         |         |         |
| 906. | (0.01454) | BD*( 1) C 19- H 35 |                                         |         |         |         |         |         |
|      | ( 39.12%) | 0.6255* C 19       | s( 28.61%)p 2.49( 71.31%)d 0.00( 0.08%) | 0.0004  | -0.5348 | 0.0064  | 0.0085  | -0.0001 |
|      |           |                    |                                         | 0.0001  | 0.1361  | 0.0001  | -0.0029 | -0.5971 |
|      |           |                    |                                         | -0.0083 | 0.0018  | -0.5813 | -0.0077 | 0.0016  |
|      |           |                    |                                         | 0.0059  | 0.0058  | -0.0232 | 0.0125  | -0.0063 |
|      | ( 60.88%) | -0.7803* H 35      | s( 99.96%)p 0.00( 0.04%)                | -0.9998 | -0.0021 | 0.0000  | -0.0034 | 0.0130  |
|      |           |                    |                                         | 0.0132  |         |         |         |         |
| 907. | (0.02223) | BD*( 1) C 15- C 19 |                                         |         |         |         |         |         |
|      | ( 50.11%) | 0.7079* C 15       | s( 35.02%)p 1.85( 64.88%)d 0.00( 0.10%) | -0.0001 | 0.5917  | 0.0075  | 0.0045  | 0.0002  |
|      |           |                    |                                         | 0.0000  | 0.6167  | 0.0080  | 0.0001  | 0.3644  |
|      |           |                    |                                         | -0.0147 | 0.0050  | 0.3676  | -0.0146 | 0.0052  |
|      |           |                    |                                         | 0.0178  | 0.0182  | 0.0113  | 0.0126  | -0.0072 |
|      | ( 49.89%) | -0.7063* C 19      | s( 36.01%)p 1.77( 63.91%)d 0.00( 0.08%) | 0.0000  | 0.6001  | 0.0017  | 0.0056  | -0.0001 |
|      |           |                    |                                         | 0.0001  | -0.6322 | 0.0255  | 0.0032  | -0.3363 |
|      |           |                    |                                         | -0.0033 | 0.0034  | -0.3543 | -0.0026 | 0.0031  |
|      |           |                    |                                         | 0.0165  | 0.0173  | 0.0113  | 0.0095  | -0.0049 |
| 908. | (0.01908) | BD*( 1) C 15- H 33 |                                         |         |         |         |         |         |
|      | ( 39.07%) | 0.6250* C 15       | s( 28.12%)p 2.55( 71.81%)d 0.00( 0.07%) | -0.0004 | 0.5300  | -0.0149 | -0.0061 | -0.0001 |
|      |           |                    |                                         | 0.0003  | -0.7818 | -0.0105 | 0.0076  | 0.2411  |

|      |           |                    |                                         |         |         |         |         |         |
|------|-----------|--------------------|-----------------------------------------|---------|---------|---------|---------|---------|
|      |           |                    |                                         | 0.0039  | 0.0007  | 0.2205  | 0.0028  | -0.0002 |
|      |           |                    |                                         | -0.0120 | -0.0105 | 0.0029  | 0.0177  | -0.0106 |
|      | ( 60.93%) | -0.7806* H 33      | s( 99.92%)p 0.00( 0.08%)                | 0.9996  | 0.0013  | 0.0025  | 0.0259  | -0.0077 |
|      |           |                    |                                         | -0.0083 |         |         |         |         |
| 909. | (0.24641) | BD*( 1) C 4- O 44  | s( 0.15%)p99.99( 99.61%)d 1.54( 0.23%)  | 0.0000  | -0.0380 | -0.0087 | -0.0006 | 0.0003  |
|      | ( 74.95%) | 0.8658* C 4        |                                         | 0.0002  | 0.7221  | -0.0075 | -0.0076 | 0.5234  |
|      |           |                    |                                         | -0.0065 | -0.0091 | 0.4477  | -0.0051 | -0.0026 |
|      |           |                    |                                         | 0.0192  | -0.0281 | -0.0044 | -0.0243 | -0.0238 |
|      | ( 25.05%) | -0.5005* O 44      | s( 0.23%)p99.99( 99.39%)d 1.71( 0.39%)  | 0.0000  | -0.0475 | 0.0020  | 0.0001  | 0.0000  |
|      |           |                    |                                         | 0.0000  | 0.7032  | 0.0002  | 0.0009  | 0.6072  |
|      |           |                    |                                         | -0.0014 | 0.0003  | 0.3614  | 0.0018  | 0.0008  |
|      |           |                    |                                         | -0.0247 | 0.0334  | 0.0131  | 0.0334  | 0.0293  |
| 910. | (0.18514) | BD*( 2) C 4- O 44  | s( 0.00%)p 1.00( 99.77%)d 0.00( 0.22%)  | 0.0000  | -0.0059 | -0.0009 | -0.0006 | 0.0001  |
|      | ( 74.32%) | 0.8621* C 4        |                                         | 0.0000  | -0.6809 | 0.0046  | 0.0083  | 0.4395  |
|      |           |                    |                                         | -0.0023 | -0.0055 | 0.5837  | -0.0060 | -0.0074 |
|      |           |                    |                                         | -0.0259 | 0.0178  | 0.0042  | -0.0091 | -0.0338 |
|      | ( 25.68%) | -0.5068* O 44      | s( 0.00%)p 1.00( 99.61%)d 0.00( 0.39%)  | 0.0000  | -0.0044 | 0.0003  | 0.0000  | 0.0000  |
|      |           |                    |                                         | 0.0000  | -0.6818 | 0.0007  | -0.0008 | 0.4461  |
|      |           |                    |                                         | -0.0006 | 0.0004  | 0.5764  | 0.0002  | 0.0008  |
|      |           |                    |                                         | 0.0335  | -0.0253 | -0.0052 | 0.0135  | 0.0441  |
| 911. | (0.01434) | BD*( 3) C 4- O 44  | s( 39.05%)p 1.56( 60.89%)d 0.00( 0.06%) | 0.0000  | 0.6101  | 0.1354  | -0.0010 | -0.0005 |
|      | ( 68.08%) | 0.8251* C 4        |                                         | -0.0005 | -0.0699 | 0.0073  | -0.0040 | 0.5817  |
|      |           |                    |                                         | -0.0264 | 0.0181  | -0.5131 | 0.0288  | -0.0195 |
|      |           |                    |                                         | -0.0036 | 0.0024  | -0.0208 | -0.0115 | 0.0037  |
|      | ( 31.92%) | -0.5649* O 44      | s( 42.47%)p 1.34( 56.76%)d 0.02( 0.77%) | 0.0001  | 0.6512  | -0.0237 | -0.0025 | 0.0001  |
|      |           |                    |                                         | 0.0000  | 0.1628  | -0.0049 | -0.0009 | -0.4722 |
|      |           |                    |                                         | 0.0214  | 0.0045  | 0.5632  | -0.0218 | -0.0046 |
|      |           |                    |                                         | -0.0178 | 0.0184  | -0.0734 | -0.0320 | 0.0244  |
| 912. | (0.34326) | BD*( 1) C 4-Ru 51  | s( 62.06%)p 0.61( 37.93%)d 0.00( 0.01%) | -0.0001 | -0.7871 | 0.0334  | -0.0003 | -0.0001 |
|      | ( 33.60%) | 0.5796* C 4        |                                         | -0.0003 | -0.0851 | 0.0001  | 0.0007  | 0.4299  |
|      |           |                    |                                         | 0.0295  | 0.0056  | -0.4310 | -0.0241 | -0.0045 |
|      |           |                    |                                         | 0.0017  | 0.0006  | 0.0085  | 0.0049  | -0.0011 |
|      | ( 66.40%) | -0.8149* Ru 51     | s( 35.74%)p 0.00( 0.09%)d 1.80( 64.17%) | 0.0000  | 0.0000  | 0.0001  | 0.0009  | -0.5974 |
|      |           |                    |                                         | -0.0220 | 0.0084  | 0.0018  | -0.0004 | -0.0001 |
|      |           |                    |                                         | 0.0009  | -0.0003 | 0.0002  | 0.0000  | 0.0001  |
|      |           |                    |                                         | 0.0000  | 0.0000  | 0.0000  | 0.0000  | 0.0000  |
|      |           |                    |                                         | -0.0003 | 0.0181  | 0.0111  | 0.0009  | -0.0001 |
|      |           |                    |                                         | 0.0000  | 0.0000  | 0.0000  | 0.0007  | 0.0045  |
|      |           |                    |                                         | -0.0058 | 0.0128  | 0.0003  | 0.0000  | 0.0000  |
|      |           |                    |                                         | 0.0000  | -0.0007 | 0.0080  | 0.0142  | -0.0015 |
|      |           |                    |                                         | -0.0005 | 0.0000  | 0.0000  | 0.1203  | 0.0023  |
|      |           |                    |                                         | 0.0003  | -0.0001 | 0.0000  | 0.0000  | -0.1945 |
|      |           |                    |                                         | -0.0122 | 0.0052  | -0.0010 | 0.0000  | 0.0000  |
|      |           |                    |                                         | 0.6690  | 0.0320  | -0.0033 | 0.0023  | 0.0001  |
|      |           |                    |                                         | 0.0000  | 0.2836  | 0.0128  | -0.0039 | 0.0011  |
|      |           |                    |                                         | 0.0000  | 0.0000  | -0.2447 | -0.0116 | -0.0007 |
|      |           |                    |                                         | -0.0009 | 0.0000  |         |         |         |
| 913. | (0.32707) | BD*( 1) C 10-Ru 51 | s( 63.04%)p 0.59( 36.95%)d 0.00( 0.01%) | -0.0001 | -0.7931 | 0.0385  | -0.0016 | -0.0002 |
|      | ( 31.56%) | 0.5618* C 10       |                                         | -0.0003 | -0.4185 | 0.0230  | -0.0046 | 0.2943  |
|      |           |                    |                                         | -0.0168 | 0.0038  | 0.3260  | -0.0237 | 0.0052  |
|      |           |                    |                                         | 0.0048  | 0.0059  | -0.0037 | -0.0024 | 0.0000  |
|      | ( 68.44%) | -0.8273* Ru 51     | s( 37.53%)p 0.00( 0.07%)d 1.66( 62.39%) | 0.0000  | 0.0000  | 0.0000  | 0.0009  | -0.6122 |
|      |           |                    |                                         | -0.0224 | 0.0047  | 0.0016  | 0.0001  | -0.0008 |
|      |           |                    |                                         | 0.0001  | -0.0002 | 0.0001  | 0.0000  | 0.0000  |
|      |           |                    |                                         | 0.0000  | 0.0000  | 0.0000  | 0.0000  | 0.0000  |
|      |           |                    |                                         | -0.0004 | 0.0082  | 0.0173  | -0.0041 | -0.0006 |
|      |           |                    |                                         | 0.0000  | 0.0000  | 0.0000  | 0.0006  | 0.0044  |
|      |           |                    |                                         | 0.0012  | 0.0138  | 0.0000  | 0.0000  | 0.0000  |
|      |           |                    |                                         | 0.0000  | 0.0003  | 0.0080  | -0.0064 | 0.0045  |
|      |           |                    |                                         | 0.0003  | 0.0000  | 0.0000  | 0.3840  | 0.0243  |
|      |           |                    |                                         | -0.0036 | 0.0008  | 0.0001  | 0.0000  | 0.5124  |
|      |           |                    |                                         | 0.0197  | 0.0002  | 0.0013  | 0.0001  | 0.0000  |
|      |           |                    |                                         | -0.2859 | -0.0033 | 0.0033  | -0.0012 | 0.0000  |
|      |           |                    |                                         | 0.0000  | -0.3499 | -0.0208 | 0.0007  | -0.0006 |
|      |           |                    |                                         | -0.0001 | 0.0000  | 0.0908  | -0.0024 | -0.0023 |
|      |           |                    |                                         | 0.0002  | 0.0000  |         |         |         |
| 914. | (0.20527) | BD*( 1) C 10- O 48 | s( 0.38%)p99.99( 99.39%)d 0.60( 0.23%)  | 0.0000  | 0.0606  | 0.0123  | 0.0005  | -0.0001 |
|      | ( 74.74%) | 0.8645* C 10       |                                         | 0.0000  | 0.4815  | 0.0025  | -0.0084 | -0.1110 |
|      |           |                    |                                         | -0.0062 | 0.0033  | 0.8655  | 0.0198  | -0.0113 |
|      |           |                    |                                         | 0.0163  | -0.0160 | 0.0188  | -0.0140 | 0.0351  |
|      | ( 25.26%) | -0.5026* O 48      | s( 0.33%)p99.99( 99.26%)d 1.21( 0.40%)  | 0.0000  | 0.0578  | -0.0021 | -0.0002 | 0.0000  |
|      |           |                    |                                         | 0.0000  | 0.5713  | -0.0022 | 0.0000  | -0.1759 |
|      |           |                    |                                         | 0.0041  | 0.0001  | 0.7970  | -0.0018 | 0.0012  |
|      |           |                    |                                         | -0.0269 | 0.0141  | -0.0170 | 0.0199  | -0.0493 |
| 915. | (0.23397) | BD*( 2) C 10- O 48 | s( 0.70%)p99.99( 99.07%)d 0.33( 0.23%)  | 0.0000  | -0.0816 | -0.0189 | -0.0010 | 0.0004  |
|      | ( 74.91%) | 0.8655* C 10       |                                         | 0.0001  | 0.5579  | 0.0002  | -0.0045 | 0.7990  |
|      |           |                    |                                         | 0.0041  | -0.0139 | -0.2018 | -0.0072 | 0.0010  |
|      |           |                    |                                         | -0.0142 | 0.0175  | 0.0159  | -0.0387 | -0.0067 |
|      | ( 25.09%) | -0.5009* O 48      | s( 0.72%)p99.99( 98.88%)d 0.56( 0.40%)  | 0.0000  | -0.0846 | 0.0035  | 0.0004  | 0.0000  |
|      |           |                    |                                         | 0.0000  | 0.4271  | 0.0052  | 0.0008  | 0.8921  |
|      |           |                    |                                         | -0.0023 | 0.0002  | -0.1030 | -0.0006 | -0.0007 |
|      |           |                    |                                         | 0.0285  | -0.0165 | -0.0286 | 0.0449  | 0.0097  |
| 916. | (0.01837) | BD*( 3) C 10- O 48 | s( 37.37%)p 1.67( 62.57%)d 0.00( 0.06%) | -0.0001 | 0.5953  | 0.1388  | -0.0020 | -0.0008 |
|      | ( 68.76%) | 0.8292* C 10       |                                         | -0.0007 | -0.5205 | -0.0290 | -0.0203 | 0.5058  |
|      |           |                    |                                         | 0.0175  | 0.0135  | 0.3109  | 0.0139  | 0.0172  |
|      |           |                    |                                         | -0.0182 | -0.0111 | 0.0115  | 0.0002  | -0.0062 |
|      | ( 31.24%) | -0.5589* O 48      | s( 42.68%)p 1.33( 56.56%)d 0.02( 0.76%) | 0.0001  | 0.6528  | -0.0252 | -0.0027 | 0.0001  |
|      |           |                    |                                         | 0.0000  | 0.5255  | -0.0186 | -0.0041 | -0.2442 |
|      |           |                    |                                         | 0.0150  | 0.0032  | -0.4785 | 0.0155  | 0.0030  |
|      |           |                    |                                         | -0.0470 | -0.0592 | 0.0376  | 0.0222  | -0.0018 |
| 917. | (0.01267) | BD*( 1) C 21- C 23 |                                         |         |         |         |         |         |

|      |           |          |            |                                         |
|------|-----------|----------|------------|-----------------------------------------|
|      | ( 50.25%) | 0.7089*  | C 21       | s( 35.54%)p 1.81( 64.36%)d 0.00( 0.09%) |
|      |           |          |            | 0.0000 0.5961 0.0058 0.0039 0.0001      |
|      |           |          |            | -0.0001 0.5200 -0.0014 -0.0047 -0.5375  |
|      |           |          |            | 0.0118 0.0038 0.2891 -0.0236 0.0001     |
|      |           |          |            | -0.0246 0.0098 -0.0111 0.0003 -0.0101   |
|      | ( 49.75%) | -0.7053* | C 23       | s( 35.95%)p 1.78( 63.96%)d 0.00( 0.09%) |
|      |           |          |            | 0.0000 0.5994 0.0131 0.0032 0.0001      |
|      |           |          |            | -0.0001 -0.5311 0.0167 -0.0021 0.5440   |
|      |           |          |            | -0.0066 -0.0002 -0.2472 -0.0144 0.0043  |
|      |           |          |            | -0.0233 0.0110 -0.0139 -0.0009 -0.0072  |
| 918. | (0.28104) | BD*( 2)  | C 21- C 23 |                                         |
|      | ( 51.95%) | 0.7207*  | C 21       | s( 0.00%)p 1.00( 99.96%)d 0.00( 0.04%)  |
|      |           |          |            | 0.0000 -0.0017 0.0009 -0.0002 0.0000    |
|      |           |          |            | -0.0001 0.5864 0.0074 0.0052 0.7410     |
|      |           |          |            | 0.0099 0.0071 0.3262 0.0041 0.0028      |
|      |           |          |            | 0.0051 0.0036 -0.0064 0.0184 -0.0015    |
|      | ( 48.05%) | -0.6932* | C 23       | s( 0.00%)p 1.00( 99.96%)d 0.00( 0.04%)  |
|      |           |          |            | 0.0000 -0.0022 0.0010 -0.0002 -0.0001   |
|      |           |          |            | -0.0001 0.5934 0.0061 0.0056 0.7327     |
|      |           |          |            | 0.0072 0.0069 0.3323 0.0039 0.0035      |
|      |           |          |            | 0.0024 -0.0104 -0.0076 -0.0102 -0.0087  |
| 919. | (0.01456) | BD*( 1)  | C 21- H 37 |                                         |
|      | ( 38.58%) | 0.6211*  | C 21       | s( 29.42%)p 2.40( 70.50%)d 0.00( 0.08%) |
|      |           |          |            | -0.0003 0.5423 -0.0086 -0.0070 -0.0001  |
|      |           |          |            | 0.0001 -0.6184 -0.0100 0.0007 0.2710    |
|      |           |          |            | 0.0036 -0.0001 0.4990 0.0081 -0.0015    |
|      |           |          |            | -0.0105 -0.0211 0.0097 0.0108 0.0005    |
|      | ( 61.42%) | -0.7837* | H 37       | s( 99.96%)p 0.00( 0.04%)                |
|      |           |          |            | 0.9998 0.0021 0.0002 0.0138 -0.0065     |
|      |           |          |            | -0.0116                                 |
| 920. | (0.01533) | BD*( 1)  | C 23- H 38 |                                         |
|      | ( 38.79%) | 0.6228*  | C 23       | s( 29.60%)p 2.38( 70.33%)d 0.00( 0.07%) |
|      |           |          |            | 0.0004 -0.5440 0.0033 0.0092 0.0002     |
|      |           |          |            | -0.0002 0.0598 -0.0002 0.0037 0.3034    |
|      |           |          |            | 0.0027 -0.0057 -0.7794 -0.0048 0.0061   |
|      |           |          |            | -0.0005 0.0028 0.0158 0.0029 -0.0202    |
|      | ( 61.21%) | -0.7824* | H 38       | s( 99.94%)p 0.00( 0.06%)                |
|      |           |          |            | -0.9997 -0.0021 -0.0001 -0.0031 -0.0078 |
|      |           |          |            | 0.0230                                  |
| 921. | (0.03584) | BD*( 1)  | C 20- N 50 |                                         |
|      | ( 59.31%) | 0.7701*  | C 20       | s( 29.92%)p 2.34( 70.01%)d 0.00( 0.07%) |
|      |           |          |            | 0.0001 -0.5466 -0.0197 0.0008 -0.0004   |
|      |           |          |            | -0.0002 -0.0565 -0.0065 -0.0006 -0.3186 |
|      |           |          |            | -0.0004 0.0001 0.7716 0.0098 0.0013     |
|      |           |          |            | -0.0001 0.0029 0.0163 0.0031 -0.0207    |
|      | ( 40.69%) | -0.6379* | N 50       | s( 33.94%)p 1.94( 65.88%)d 0.01( 0.18%) |
|      |           |          |            | 0.0001 -0.5824 -0.0135 0.0005 -0.0007   |
|      |           |          |            | 0.0002 0.0647 -0.0066 -0.0015 0.3034    |
|      |           |          |            | 0.0105 0.0019 -0.7498 -0.0143 -0.0012   |
|      |           |          |            | 0.0003 0.0153 0.0204 0.0003 -0.0332     |
| 922. | (0.49866) | BD*( 2)  | C 20- N 50 |                                         |
|      | ( 65.90%) | 0.8118*  | C 20       | s( 0.00%)p 1.00( 99.92%)d 0.00( 0.08%)  |
|      |           |          |            | 0.0000 0.0036 0.0010 0.0002 -0.0001     |
|      |           |          |            | 0.0000 0.5978 0.0243 -0.0015 0.7221     |
|      |           |          |            | 0.0289 -0.0023 0.3445 0.0153 -0.0007    |
|      |           |          |            | 0.0054 -0.0155 -0.0133 -0.0130 -0.0145  |
|      | ( 34.10%) | -0.5839* | N 50       | s( 0.00%)p 1.00( 99.91%)d 0.00( 0.09%)  |
|      |           |          |            | 0.0000 0.0014 0.0000 0.0007 -0.0001     |
|      |           |          |            | 0.0000 0.5824 0.0193 -0.0009 0.7341     |
|      |           |          |            | 0.0243 -0.0013 0.3460 0.0146 -0.0010    |
|      |           |          |            | -0.0127 0.0054 0.0179 -0.0159 0.0135    |
| 923. | (0.03162) | BD*( 1)  | C 20- C 23 |                                         |
|      | ( 49.73%) | 0.7052*  | C 20       | s( 35.44%)p 1.82( 64.50%)d 0.00( 0.07%) |
|      |           |          |            | 0.0002 -0.5953 0.0001 0.0024 -0.0001    |
|      |           |          |            | 0.0000 0.5887 -0.0155 0.0013 -0.2537    |
|      |           |          |            | 0.0120 -0.0001 -0.4833 -0.0012 -0.0020  |
|      |           |          |            | 0.0103 0.0190 -0.0094 -0.0100 0.0006    |
|      | ( 50.27%) | -0.7090* | C 23       | s( 34.40%)p 1.90( 65.50%)d 0.00( 0.09%) |
|      |           |          |            | 0.0000 -0.5865 0.0072 -0.0068 -0.0002   |
|      |           |          |            | 0.0002 -0.6007 0.0114 0.0022 0.2720     |
|      |           |          |            | -0.0080 -0.0002 0.4690 -0.0011 -0.0037  |
|      |           |          |            | 0.0124 0.0236 -0.0089 -0.0113 -0.0032   |
| 924. | (0.03005) | BD*( 1)  | C 20- C 22 |                                         |
|      | ( 49.07%) | 0.7005*  | C 20       | s( 34.65%)p 1.88( 65.30%)d 0.00( 0.05%) |
|      |           |          |            | 0.0003 -0.5885 0.0130 -0.0016 0.0004    |
|      |           |          |            | 0.0000 -0.5395 0.0151 0.0027 0.5573     |
|      |           |          |            | -0.0130 -0.0011 -0.2257 0.0004 -0.0021  |
|      |           |          |            | 0.0174 -0.0060 0.0055 0.0007 0.0098     |
|      | ( 50.93%) | -0.7137* | C 22       | s( 30.47%)p 2.28( 69.46%)d 0.00( 0.07%) |
|      |           |          |            | 0.0002 -0.5519 0.0082 -0.0013 0.0002    |
|      |           |          |            | -0.0003 0.5678 -0.0083 0.0016 -0.5855   |
|      |           |          |            | 0.0102 -0.0006 0.1708 -0.0074 -0.0018   |
|      |           |          |            | 0.0216 -0.0073 0.0074 0.0006 0.0110     |
| 925. | (0.02958) | BD*( 1)  | C 22- C 25 |                                         |
|      | ( 49.08%) | 0.7006*  | C 22       | s( 34.61%)p 1.89( 65.32%)d 0.00( 0.07%) |
|      |           |          |            | 0.0003 -0.5883 -0.0063 0.0002 -0.0003   |
|      |           |          |            | 0.0000 -0.0040 0.0057 -0.0001 0.3357    |
|      |           |          |            | -0.0088 0.0010 -0.7351 0.0040 -0.0027   |
|      |           |          |            | 0.0008 0.0009 0.0163 0.0033 -0.0194     |
|      | ( 50.92%) | -0.7136* | C 25       | s( 35.21%)p 1.84( 64.71%)d 0.00( 0.08%) |
|      |           |          |            | 0.0000 -0.5933 0.0063 -0.0078 -0.0002   |
|      |           |          |            | 0.0002 0.0447 -0.0063 0.0003 -0.3525    |
|      |           |          |            | 0.0108 0.0013 0.7215 -0.0094 -0.0030    |
|      |           |          |            | 0.0024 -0.0002 0.0188 0.0040 -0.0208    |
| 926. | (0.27531) | BD*( 1)  | C 16-Ru 52 |                                         |
|      | ( 40.28%) | 0.6347*  | C 16       | s( 27.83%)p 2.59( 72.16%)d 0.00( 0.01%) |
|      |           |          |            | -0.0001 0.5265 -0.0324 0.0024 -0.0006   |
|      |           |          |            | -0.0002 -0.0237 0.0060 0.0018 0.3735    |
|      |           |          |            | -0.0375 0.0010 -0.7602 0.0477 -0.0024   |
|      |           |          |            | -0.0008 0.0009 -0.0065 -0.0024 0.0026   |
|      | ( 59.72%) | -0.7728* | Ru 52      | s( 27.00%)p 0.00( 0.05%)d 2.70( 72.94%) |
|      |           |          |            | 0.0000 0.0000 -0.0001 0.0007 0.5194     |
|      |           |          |            | 0.0130 -0.0091 0.0005 0.0009 -0.0011    |
|      |           |          |            | 0.0015 -0.0005 0.0001 0.0000 0.0000     |
|      |           |          |            | 0.0000 0.0001 -0.0001 0.0000 0.0000     |
|      |           |          |            | -0.0004 0.0044 0.0046 -0.0002 0.0000    |
|      |           |          |            | 0.0000 0.0000 0.0000 0.0006 0.0062      |
|      |           |          |            | -0.0091 0.0100 -0.0002 0.0000 0.0000    |
|      |           |          |            | 0.0000 -0.0012 -0.0134 0.0086 -0.0038   |
|      |           |          |            | 0.0003 0.0000 0.0000 -0.0615 0.0116     |
|      |           |          |            | -0.0024 0.0001 0.0000 0.0000 0.0838     |
|      |           |          |            | -0.0079 -0.0021 0.0003 0.0000 -0.0001   |
|      |           |          |            | -0.7381 0.0062 -0.0005 -0.0016 0.0000   |
|      |           |          |            | 0.0000 -0.3002 0.0017 0.0032 -0.0006    |
|      |           |          |            | 0.0000 0.0000 0.2888 -0.0042 0.0040     |
|      |           |          |            | 0.0010 0.0000                           |



|      |           |                    |                                         |  |  |  |  |  |  |
|------|-----------|--------------------|-----------------------------------------|--|--|--|--|--|--|
| 927. | (0.03384) | BD* (1) C 16- C 22 |                                         |  |  |  |  |  |  |
|      | ( 53.59%) | 0.7320* C 16       | s( 35.00%)p 1.85( 64.90%)d 0.00( 0.10%) |  |  |  |  |  |  |
|      |           |                    | -0.0001 0.5915 0.0126 0.0014 0.0005     |  |  |  |  |  |  |
|      |           |                    | 0.0004 -0.5379 -0.0145 -0.0041 0.2456   |  |  |  |  |  |  |
|      |           |                    | 0.0078 0.0011 0.5467 0.0109 0.0032      |  |  |  |  |  |  |
|      |           |                    | -0.0103 -0.0258 0.0067 0.0083 0.0119    |  |  |  |  |  |  |
|      | ( 46.41%) | -0.6813* C 22      | s( 34.87%)p 1.87( 65.07%)d 0.00( 0.06%) |  |  |  |  |  |  |
|      |           |                    | -0.0001 0.5905 0.0028 -0.0024 0.0000    |  |  |  |  |  |  |
|      |           |                    | -0.0002 0.5253 -0.0040 -0.0035 -0.2142  |  |  |  |  |  |  |
|      |           |                    | 0.0037 -0.0004 -0.5734 -0.0020 0.0062   |  |  |  |  |  |  |
|      |           |                    | -0.0088 -0.0198 0.0058 0.0070 0.0085    |  |  |  |  |  |  |
| 928. | (0.02097) | BD* (1) C 16- C 18 |                                         |  |  |  |  |  |  |
|      | ( 51.97%) | 0.7209* C 16       | s( 37.20%)p 1.69( 62.70%)d 0.00( 0.09%) |  |  |  |  |  |  |
|      |           |                    | 0.0001 -0.6090 -0.0344 0.0021 -0.0002   |  |  |  |  |  |  |
|      |           |                    | 0.0000 -0.5386 -0.0193 -0.0054 0.5660   |  |  |  |  |  |  |
|      |           |                    | 0.0158 0.0048 -0.1260 0.0088 0.0024     |  |  |  |  |  |  |
|      |           |                    | 0.0240 -0.0091 0.0127 0.0035 0.0096     |  |  |  |  |  |  |
|      | ( 48.03%) | -0.6931* C 18      | s( 36.77%)p 1.72( 63.14%)d 0.00( 0.09%) |  |  |  |  |  |  |
|      |           |                    | -0.0001 -0.6063 -0.0081 -0.0016 0.0000  |  |  |  |  |  |  |
|      |           |                    | 0.0004 0.5122 -0.0016 -0.0040 -0.5735   |  |  |  |  |  |  |
|      |           |                    | 0.0089 0.0039 0.1992 -0.0181 0.0003     |  |  |  |  |  |  |
|      |           |                    | 0.0261 -0.0057 0.0076 0.0018 0.0125     |  |  |  |  |  |  |
| 929. | (0.01536) | BD* (1) C 24- C 26 |                                         |  |  |  |  |  |  |
|      | ( 50.20%) | 0.7085* C 24       | s( 35.31%)p 1.83( 64.60%)d 0.00( 0.09%) |  |  |  |  |  |  |
|      |           |                    | 0.0000 0.5941 0.0077 0.0033 0.0000      |  |  |  |  |  |  |
|      |           |                    | 0.0001 -0.5059 0.0016 0.0031 0.2134     |  |  |  |  |  |  |
|      |           |                    | 0.0093 -0.0026 0.5864 -0.0244 -0.0001   |  |  |  |  |  |  |
|      |           |                    | -0.0107 -0.0238 0.0106 0.0087 0.0072    |  |  |  |  |  |  |
|      | ( 49.80%) | -0.7057* C 26      | s( 35.27%)p 1.83( 64.64%)d 0.00( 0.09%) |  |  |  |  |  |  |
|      |           |                    | 0.0000 0.5938 0.0050 0.0041 0.0001      |  |  |  |  |  |  |
|      |           |                    | -0.0001 0.5282 -0.0189 -0.0003 -0.2507  |  |  |  |  |  |  |
|      |           |                    | 0.0180 -0.0019 -0.5513 -0.0014 0.0047   |  |  |  |  |  |  |
|      |           |                    | -0.0098 -0.0235 0.0092 0.0083 0.0091    |  |  |  |  |  |  |
| 930. | (0.01452) | BD* (1) C 24- H 36 |                                         |  |  |  |  |  |  |
|      | ( 39.09%) | 0.6252* C 24       | s( 28.62%)p 2.49( 71.30%)d 0.00( 0.08%) |  |  |  |  |  |  |
|      |           |                    | 0.0004 -0.5349 0.0065 0.0085 -0.0001    |  |  |  |  |  |  |
|      |           |                    | 0.0001 -0.5664 -0.0068 0.0028 0.6034    |  |  |  |  |  |  |
|      |           |                    | 0.0084 -0.0018 -0.1670 -0.0037 -0.0018  |  |  |  |  |  |  |
|      |           |                    | 0.0230 -0.0069 0.0064 0.0015 0.0134     |  |  |  |  |  |  |
|      | ( 60.91%) | -0.7805* H 36      | s( 99.96%)p 0.00( 0.04%)                |  |  |  |  |  |  |
|      |           |                    | -0.9998 -0.0021 0.0000 0.0131 -0.0132   |  |  |  |  |  |  |
|      |           |                    | 0.0035                                  |  |  |  |  |  |  |
| 931. | (0.02232) | BD* (1) C 18- C 24 |                                         |  |  |  |  |  |  |
|      | ( 50.12%) | 0.7079* C 18       | s( 35.03%)p 1.85( 64.87%)d 0.00( 0.10%) |  |  |  |  |  |  |
|      |           |                    | -0.0001 0.5918 0.0077 0.0045 0.0002     |  |  |  |  |  |  |
|      |           |                    | 0.0000 0.0242 -0.0163 0.0043 -0.3525    |  |  |  |  |  |  |
|      |           |                    | 0.0149 -0.0049 0.7234 -0.0003 0.0025    |  |  |  |  |  |  |
|      |           |                    | -0.0013 -0.0008 -0.0205 -0.0043 0.0234  |  |  |  |  |  |  |
|      | ( 49.88%) | -0.7063* C 24      | s( 36.03%)p 1.77( 63.89%)d 0.00( 0.08%) |  |  |  |  |  |  |
|      |           |                    | 0.0000 0.6002 0.0018 0.0056 -0.0001     |  |  |  |  |  |  |
|      |           |                    | 0.0001 -0.0060 -0.0143 0.0012 0.3240    |  |  |  |  |  |  |
|      |           |                    | 0.0039 -0.0033 -0.7302 0.0210 0.0043    |  |  |  |  |  |  |
|      |           |                    | -0.0019 0.0017 -0.0194 -0.0044 0.0203   |  |  |  |  |  |  |
| 932. | (0.31818) | BD* (2) C 18- C 24 |                                         |  |  |  |  |  |  |
|      | ( 48.86%) | 0.6990* C 18       | s( 0.00%)p 1.00( 99.97%)d 0.00( 0.03%)  |  |  |  |  |  |  |
|      |           |                    | 0.0000 -0.0001 0.0000 -0.0001 0.0000    |  |  |  |  |  |  |
|      |           |                    | 0.0000 -0.6509 -0.0046 -0.0057 -0.6906  |  |  |  |  |  |  |
|      |           |                    | -0.0069 -0.0063 -0.3146 -0.0018 -0.0030 |  |  |  |  |  |  |
|      |           |                    | 0.0052 -0.0081 -0.0110 0.0039 -0.0084   |  |  |  |  |  |  |
|      | ( 51.14%) | -0.7151* C 24      | s( 0.00%)p 1.00( 99.97%)d 0.00( 0.03%)  |  |  |  |  |  |  |
|      |           |                    | 0.0000 -0.0020 -0.0005 0.0001 0.0000    |  |  |  |  |  |  |
|      |           |                    | 0.0000 -0.6496 -0.0079 -0.0058 -0.6960  |  |  |  |  |  |  |
|      |           |                    | -0.0088 -0.0061 -0.3051 -0.0037 -0.0026 |  |  |  |  |  |  |
|      |           |                    | -0.0027 0.0095 0.0046 0.0117 0.0062     |  |  |  |  |  |  |
| 933. | (0.01892) | BD* (1) C 18- H 32 |                                         |  |  |  |  |  |  |
|      | ( 39.07%) | 0.6250* C 18       | s( 28.15%)p 2.55( 71.78%)d 0.00( 0.07%) |  |  |  |  |  |  |
|      |           |                    | 0.0004 -0.5304 0.0149 0.0061 0.0001     |  |  |  |  |  |  |
|      |           |                    | -0.0003 -0.5588 -0.0073 0.0037 0.2625   |  |  |  |  |  |  |
|      |           |                    | 0.0040 0.0006 0.5800 0.0078 -0.0066     |  |  |  |  |  |  |
|      |           |                    | 0.0088 0.0206 -0.0097 -0.0077 -0.0057   |  |  |  |  |  |  |
|      | ( 60.93%) | -0.7806* H 32      | s( 99.92%)p 0.00( 0.08%)                |  |  |  |  |  |  |
|      |           |                    | -0.9996 -0.0012 -0.0025 0.0196 -0.0085  |  |  |  |  |  |  |
|      |           |                    | -0.0187                                 |  |  |  |  |  |  |
| 934. | (0.00644) | BD* (1) H 43- O 45 |                                         |  |  |  |  |  |  |
|      | ( 74.33%) | 0.8621* H 43       | s( 99.99%)p 0.00( 0.01%)                |  |  |  |  |  |  |
|      |           |                    | -0.9999 -0.0036 -0.0005 -0.0006 -0.0013 |  |  |  |  |  |  |
|      |           |                    | -0.0093                                 |  |  |  |  |  |  |
|      | ( 25.67%) | -0.5067* O 45      | s( 22.37%)p 3.46( 77.38%)d 0.01( 0.25%) |  |  |  |  |  |  |
|      |           |                    | 0.0000 -0.4725 0.0212 0.0037 -0.0002    |  |  |  |  |  |  |
|      |           |                    | 0.0000 0.7970 0.0362 0.0010 -0.1547     |  |  |  |  |  |  |
|      |           |                    | -0.0063 0.0000 0.3355 0.0268 0.0011     |  |  |  |  |  |  |
|      |           |                    | 0.0154 -0.0243 0.0057 -0.0349 0.0195    |  |  |  |  |  |  |

NBO DIRECTIONALITY AND BOND BENDING (deviations from line of nuclear centers)

[Thresholds for printing: angular deviation > 1.0 degree]  
p- or d-character > 25.0%  
orbital occupancy > 0.10e

| NBO                  | Line of Centers |       | Hybrid 1 |       |      | Hybrid 2 |       |      |
|----------------------|-----------------|-------|----------|-------|------|----------|-------|------|
|                      | Theta           | Phi   | Theta    | Phi   | Dev  | Theta    | Phi   | Dev  |
| 2. BD (2) C 1- C 2   | 66.3            | 159.3 | 46.8     | 273.1 | 89.6 | 46.8     | 274.0 | 89.7 |
| 3. BD (1) C 1- C 3   | 69.3            | 23.3  | 70.5     | 22.5  | 1.4  | --       | --    | --   |
| 5. BD (1) C 2- H27   | 106.1           | 200.7 | 108.0    | 201.1 | 1.9  | --       | --    | --   |
| 6. BD (1) C 2- N49   | 42.9            | 91.6  | 43.0     | 88.8  | 2.0  | 136.9    | 268.0 | 2.5  |
| 8. BD (2) C 3- C 5   | 43.1            | 91.8  | 47.2     | -87.5 | 90.2 | 46.7     | 272.7 | 90.2 |
| 10. BD (1) C 4- O44  | 134.9           | 102.5 | 117.0    | 215.5 | 85.7 | 111.0    | 221.0 | 86.4 |
| 11. BD (2) C 4- O44  | 134.9           | 102.5 | 54.6     | 147.0 | 89.8 | 54.2     | 147.1 | 89.8 |
| 12. BD (2) C 4- O44  | 134.9           | 102.5 | 131.1    | 96.6  | 5.8  | 41.5     | 289.1 | 5.7  |
| 13. BD (1) C 4-Ru51  | 44.1            | 281.9 | 45.8     | 280.3 | 2.1  | 137.6    | 104.0 | 2.2  |
| 14. BD (1) C 5- C 7  | 68.2            | 160.6 | --       | --    | --   | 110.5    | 342.1 | -2.0 |
| 16. BD (1) C 6- O46  | 111.7           | 326.0 | 32.9     | 359.0 | 83.5 | 22.9     | 16.8  | 83.5 |
| 17. BD (2) C 6- O46  | 111.7           | 326.0 | 124.1    | 0.0   | 32.3 | 106.1    | 65.2  | 87.7 |
| 18. BD (3) C 6- O46  | 111.7           | 326.0 | 119.8    | 318.7 | 10.5 | 77.8     | 153.1 | 11.6 |
| 19. BD (1) C 6- Ru52 | 66.3            | 151.1 | 69.2     | 147.4 | 4.5  | 116.0    | 333.8 | 3.3  |
| 20. BD (1) C 7- C 9  | 44.9            | 100.0 | 44.1     | 96.0  | 2.9  | 134.1    | 283.6 | 2.7  |
| 22. BD (2) C 7- N49  | 110.9           | 204.7 | 46.1     | 273.0 | 89.9 | 46.8     | -85.9 | 89.7 |
| 23. BD (1) C 8- O47  | 117.4           | 230.6 | 134.4    | 117.2 | 85.9 | 129.8    | 109.2 | 86.5 |
| 24. BD (2) C 8- O47  | 117.4           | 230.6 | 126.3    | 341.0 | 88.7 | 124.9    | -16.4 | 88.8 |
| 25. BD (3) C 8- O47  | 117.4           | 230.6 | 112.3    | 233.3 | 5.7  | 57.6     | 47.4  | 5.7  |
| 26. BD (1) C 8-Ru52  | 62.6            | 49.5  | 64.1     | 51.0  | 2.0  | 119.0    | 228.1 | 2.1  |
| 27. BD (1) C 9- C11  | 76.4            | 165.3 | --       | --    | --   | 105.8    | 342.8 | 3.3  |
| 28. BD (1) C 9- C13  | 62.7            | 29.6  | 64.3     | 28.2  | 2.0  | 118.5    | 210.3 | 1.4  |

|      |     |     |      |      |       |       |       |       |      |       |       |      |
|------|-----|-----|------|------|-------|-------|-------|-------|------|-------|-------|------|
| 29.  | BD  | (2) | C 9- | C13  | 62.7  | 29.6  | -44.9 | 89.5  | 89.4 | 45.1  | 267.7 | 89.5 |
| 30.  | BD  | (1) | C10- | O48  | 58.5  | 144.3 | -28.9 | 166.7 | 85.6 | 37.2  | 343.0 | 85.8 |
| 31.  | BD  | (2) | C10- | O48  | 58.5  | 144.3 | -77.7 | 54.7  | 83.9 | 84.3  | 244.5 | 84.4 |
| 32.  | BD  | (3) | C10- | O48  | 58.5  | 144.3 | 66.4  | 136.7 | 10.4 | 129.6 | 335.4 | 12.1 |
| 33.  | BD  | (1) | C10- | Ru51 | 121.5 | 330.9 | 122.2 | 324.9 | 5.1  | 60.0  | 155.1 | 4.0  |
| 34.  | BD  | (1) | C11- | C15  | 46.8  | 100.4 | 47.8  | 107.1 | 5.0  | --    | --    | --   |
| 35.  | BD  | (2) | C11- | C15  | 46.8  | 100.4 | 43.7  | 269.5 | 90.0 | 44.1  | 268.9 | 89.7 |
| 36.  | BD  | (1) | C11- | Ru51 | 116.2 | 219.6 | 116.8 | 209.2 | 9.3  | 64.0  | 49.2  | 8.6  |
| 37.  | BD  | (1) | C12- | C14  | 56.0  | 155.9 | 55.4  | 157.1 | 1.1  | --    | --    | --   |
| 38.  | BD  | (2) | C12- | C14  | 56.0  | 155.9 | -70.0 | 232.0 | 89.8 | 60.4  | 0.0   | 67.6 |
| 39.  | BD  | (1) | C12- | H29  | 158.8 | 66.5  | 159.7 | 67.9  | 1.1  | --    | --    | --   |
| 40.  | BD  | (1) | C12- | N50  | 70.7  | 314.6 | 69.0  | 314.1 | 1.8  | 112.0 | 133.2 | 3.0  |
| 43.  | BD  | (1) | C14- | C21  | 20.9  | 255.9 | 20.6  | 251.6 | 1.5  | --    | --    | --   |
| 47.  | BD  | (1) | C16- | C18  | 77.2  | 312.3 | 81.9  | 313.8 | 5.0  | --    | --    | --   |
| 48.  | BD  | (1) | C16- | C22  | 44.7  | 157.5 | 47.5  | 155.4 | 3.1  | --    | --    | --   |
| 49.  | BD  | (1) | C16- | Ru52 | 146.3 | 94.8  | 154.7 | 92.7  | 8.5  | 41.1  | 276.2 | 7.4  |
| 51.  | BD  | (2) | C17- | C19  | 76.9  | 164.1 | -44.7 | 87.6  | 90.0 | 44.5  | 267.8 | 90.0 |
| 54.  | BD  | (2) | C18- | C24  | 25.1  | 272.9 | 64.2  | 0.0   | 65.6 | 72.3  | 47.0  | 89.7 |
| 57.  | BD  | (1) | C20- | C22  | 76.0  | 313.9 | 73.2  | 313.8 | 2.7  | 101.4 | 134.3 | 2.7  |
| 58.  | BD  | (1) | C20- | C23  | 53.5  | 156.2 | 52.0  | 157.2 | 1.7  | --    | --    | --   |
| 59.  | BD  | (1) | C20- | N50  | 157.7 | 76.9  | --    | --    | --   | 22.7  | 259.6 | 1.1  |
| 60.  | BD  | (2) | C20- | N50  | 157.7 | 76.9  | 69.8  | 50.4  | 90.0 | 59.0  | 0.0   | 66.2 |
| 62.  | BD  | (2) | C21- | C23  | 70.5  | 314.2 | 109.0 | 231.7 | 89.6 | 109.5 | 231.0 | 89.6 |
| 64.  | BD  | (1) | C22- | C25  | 25.2  | 273.8 | 24.1  | 269.7 | 2.0  | 154.2 | 96.5  | 1.3  |
| 69.  | BD  | (2) | C25- | C26  | 78.1  | 313.4 | 107.6 | 227.5 | 89.8 | 107.6 | 227.1 | 89.8 |
| 147. | LP  | (1) | C22  |      | --    | --    | 63.1  | 0.0   | --   | --    | --    | --   |
| 148. | LP  | (1) | O44  |      | --    | --    | 45.0  | 282.7 | --   | --    | --    | --   |
| 149. | LP  | (1) | O45  |      | --    | --    | 136.3 | 339.2 | --   | --    | --    | --   |
| 150. | LP  | (2) | O45  |      | --    | --    | 7.9   | 348.8 | --   | --    | --    | --   |
| 151. | LP  | (3) | O45  |      | --    | --    | 102.0 | 0.0   | --   | --    | --    | --   |
| 152. | LP  | (1) | O46  |      | --    | --    | 111.6 | 325.9 | --   | --    | --    | --   |
| 153. | LP  | (1) | O47  |      | --    | --    | 50.7  | 0.0   | --   | --    | --    | --   |
| 154. | LP  | (1) | O48  |      | --    | --    | 121.5 | 324.2 | --   | --    | --    | --   |
| 155. | LP  | (1) | N49  |      | --    | --    | 112.6 | 340.9 | --   | --    | --    | --   |
| 156. | LP  | (1) | N50  |      | --    | --    | 125.9 | 337.2 | --   | --    | --    | --   |
| 157. | LP  | (1) | Ru51 |      | --    | --    | 8.9   | 0.0   | --   | --    | --    | --   |
| 158. | LP  | (2) | Ru51 |      | --    | --    | 56.2  | 357.2 | --   | --    | --    | --   |
| 159. | LP  | (3) | Ru51 |      | --    | --    | 80.5  | 312.5 | --   | --    | --    | --   |
| 160. | LP  | (1) | Ru52 |      | --    | --    | 65.1  | 327.0 | --   | --    | --    | --   |
| 161. | LP  | (2) | Ru52 |      | --    | --    | 10.6  | 0.0   | --   | --    | --    | --   |
| 162. | LP  | (3) | Ru52 |      | --    | --    | 86.0  | 0.0   | --   | --    | --    | --   |
| 163. | LP  | (1) | C153 |      | --    | --    | 32.8  | 359.6 | --   | --    | --    | --   |
| 164. | LP  | (2) | C153 |      | --    | --    | 120.8 | 342.9 | --   | --    | --    | --   |
| 165. | LP  | (3) | C153 |      | --    | --    | 33.4  | 315.2 | --   | --    | --    | --   |
| 166. | LP  | (4) | C153 |      | --    | --    | 71.1  | 0.0   | --   | --    | --    | --   |
| 167. | LP* | (1) | C16  |      | --    | --    | 63.2  | 0.0   | --   | --    | --    | --   |
| 864. | BD* | (2) | C12- | C14  | 56.0  | 155.9 | -70.0 | 232.0 | 89.8 | 60.4  | 0.0   | 67.6 |
| 870. | BD* | (2) | C25- | C26  | 78.1  | 313.4 | 107.6 | 227.5 | 89.8 | 107.6 | 227.1 | 89.8 |
| 874. | BD* | (2) | C 3- | C 5  | 43.1  | 91.8  | 47.2  | -87.5 | 90.2 | 46.7  | 272.7 | 90.2 |
| 878. | BD* | (1) | C 8- | O47  | 117.4 | 230.6 | 134.4 | 117.2 | 85.9 | 129.8 | 109.2 | 86.5 |
| 879. | BD* | (2) | C 8- | O47  | 117.4 | 230.6 | 126.3 | 341.0 | 88.7 | 124.9 | -16.4 | 88.8 |
| 881. | BD* | (1) | C 8- | Ru52 | 62.6  | 49.5  | 64.1  | 51.0  | 2.0  | 119.0 | 228.1 | 2.1  |
| 882. | BD* | (1) | C 6- | Ru52 | 66.3  | 151.1 | 69.2  | 147.4 | 4.5  | 116.0 | 333.8 | 3.3  |
| 883. | BD* | (1) | C 6- | O46  | 111.7 | 326.0 | 32.9  | 359.0 | 83.5 | 22.9  | 16.8  | 83.5 |
| 884. | BD* | (2) | C 6- | O46  | 111.7 | 326.0 | 124.1 | 0.0   | 32.3 | 106.1 | 65.2  | 87.7 |
| 888. | BD* | (2) | C 1- | C 2  | 66.3  | 159.3 | 46.8  | 273.1 | 89.6 | 46.8  | 274.0 | 89.7 |
| 893. | BD* | (2) | C 7- | N49  | 110.9 | 204.7 | 46.1  | 273.0 | 89.9 | 46.8  | -85.9 | 89.7 |
| 896. | BD* | (2) | C 9- | C13  | 62.7  | 29.6  | -44.9 | 89.5  | 89.4 | 45.1  | 267.7 | 89.5 |
| 901. | BD* | (2) | C11- | C15  | 46.8  | 100.4 | 43.7  | 269.5 | 90.0 | 44.1  | 268.9 | 89.7 |
| 902. | BD* | (1) | C11- | Ru51 | 116.2 | 219.6 | 116.8 | 209.2 | 9.3  | 64.0  | 49.2  | 8.6  |
| 904. | BD* | (2) | C17- | C19  | 76.9  | 164.1 | -44.7 | 87.6  | 90.0 | 44.5  | 267.8 | 90.0 |
| 909. | BD* | (1) | C 4- | O44  | 134.9 | 102.5 | 117.0 | 215.5 | 85.7 | 111.0 | 221.0 | 86.4 |
| 910. | BD* | (2) | C 4- | O44  | 134.9 | 102.5 | 54.6  | 147.0 | 89.8 | 54.2  | 147.1 | 89.8 |
| 912. | BD* | (1) | C 4- | Ru51 | 44.1  | 281.9 | 45.8  | 280.3 | 2.1  | 137.6 | 104.0 | 2.2  |
| 913. | BD* | (1) | C10- | Ru51 | 121.5 | 330.9 | 122.2 | 324.9 | 5.1  | 60.0  | 155.1 | 4.0  |
| 914. | BD* | (1) | C10- | O48  | 58.5  | 144.3 | -28.9 | 166.7 | 85.6 | 37.2  | 343.0 | 85.8 |
| 915. | BD* | (2) | C10- | O48  | 58.5  | 144.3 | -77.7 | 54.7  | 83.9 | 84.3  | 244.5 | 84.4 |
| 918. | BD* | (2) | C21- | C23  | 70.5  | 314.2 | 109.0 | 231.7 | 89.6 | 109.5 | 231.0 | 89.6 |
| 922. | BD* | (2) | C20- | N50  | 157.7 | 76.9  | 69.8  | 50.4  | 90.0 | 59.0  | 0.0   | 66.2 |
| 926. | BD* | (1) | C16- | Ru52 | 146.3 | 94.8  | 154.7 | 92.7  | 8.5  | 41.1  | 276.2 | 7.4  |
| 932. | BD* | (2) | C18- | C24  | 25.1  | 272.9 | 64.2  | 0.0   | 65.6 | 72.3  | 47.0  | 89.7 |

3-Center, 4-Electron A:-B:-C Hyperbonds (A-B :C <=> A: B-C)  
[threshold for detection: 33.3%]

| Hyperbond A:-B:-C     | %A-B/%B-C | OCC.   | NBOs    |       | 3-center hybrids |      |      |
|-----------------------|-----------|--------|---------|-------|------------------|------|------|
|                       |           |        | BD(A-B) | LP(C) | h(A)             | h(B) | h(C) |
| 1. C 6:-Ru 52:- N 50  | 65.5/34.5 | 3.9159 | 19      | 156   | 37               | 38   | 228  |
| 2. C 10:-Ru 51:- N 49 | 64.9/35.1 | 3.9129 | 33      | 155   | 65               | 66   | 227  |
| 3. C 26:- C 25:- C 22 | 56.7/43.3 | 3.0616 | 69      | 147   | 137              | 138  | 219  |

\*\*\* sorry: cannot construct NLMOMO matrix.  
\*\*\* sorry: AOMO matrix not available

CMO: NBO Analysis of Canonical Molecular Orbitals

SECOND ORDER PERTURBATION THEORY ANALYSIS OF FOCK MATRIX IN NBO BASIS

Threshold for printing: 0.50 kcal/mol  
(Intermolecular threshold: 0.05 kcal/mol)

| Donor NBO (i)      | Acceptor NBO (j)     | E(2)<br>kcal/mol | E(j)-E(i)<br>a.u. | F(i,j)<br>a.u. |
|--------------------|----------------------|------------------|-------------------|----------------|
| within unit 1      |                      |                  |                   |                |
| 1. BD (1) C 1- C 2 | 199. RV*(2) C 3      | 0.97             | 2.37              | 0.043          |
| 1. BD (1) C 1- C 2 | 718. RV*(1) N49      | 1.85             | 2.58              | 0.062          |
| 1. BD (1) C 1- C 2 | 748. RV*(1) Ru51     | 0.62             | 18.72             | 0.096          |
| 1. BD (1) C 1- C 2 | 755. RV*(8) Ru51     | 0.61             | 6.80              | 0.058          |
| 1. BD (1) C 1- C 2 | 759. RV*(12) Ru51    | 0.54             | 15.40             | 0.082          |
| 1. BD (1) C 1- C 2 | 767. RV*(20) Ru51    | 0.56             | 17.86             | 0.089          |
| 1. BD (1) C 1- C 2 | 776. RV*(29) Ru51    | 0.68             | 78.09             | 0.206          |
| 1. BD (1) C 1- C 2 | 777. RV*(30) Ru51    | 0.57             | 26.37             | 0.110          |
| 1. BD (1) C 1- C 2 | 780. RV*(33) Ru51    | 0.59             | 324.99            | 0.391          |
| 1. BD (1) C 1- C 2 | 875. BD*(1) C 3- H41 | 2.41             | 1.03              | 0.045          |
| 1. BD (1) C 1- C 2 | 886. BD*(1) C 1- C 3 | 0.72             | 1.10              | 0.025          |
| 1. BD (1) C 1- C 2 | 890. BD*(1) C 2- N49 | 0.55             | 1.10              | 0.022          |
| 2. BD (2) C 1- C 2 | 200. RV*(3) C 3      | 0.94             | 0.78              | 0.027          |
| 2. BD (2) C 1- C 2 | 719. RV*(2) N49      | 0.85             | 1.10              | 0.030          |
| 2. BD (2) C 1- C 2 | 874. BD*(2) C 3- C 5 | 16.57            | 0.23              | 0.056          |
| 2. BD (2) C 1- C 2 | 888. BD*(2) C 1- C 2 | 0.60             | 0.23              | 0.011          |
| 2. BD (2) C 1- C 2 | 893. BD*(2) C 7- N49 | 10.69            | 0.21              | 0.044          |

|     |    |     |   |    |     |      |      |      |      |           |         |       |       |       |       |       |
|-----|----|-----|---|----|-----|------|------|------|------|-----------|---------|-------|-------|-------|-------|-------|
| 3.  | BD | (1) | C | 1- | C   | 3    | 230. | RY*  | (3)  | C         | 5       | 0.98  | 2.31  | 0.043 |       |       |
| 3.  | BD | (1) | C | 1- | C   | 3    | 873. | BD*  | (1)  | C         | 3-      | C     | 5     | 0.81  | 1.12  | 0.027 |
| 3.  | BD | (1) | C | 1- | C   | 3    | 877. | BD*  | (1)  | C         | 5-      | H28   | 2.48  | 1.03  | 0.045 |       |
| 3.  | BD | (1) | C | 1- | C   | 3    | 887. | BD*  | (1)  | C         | 1-      | C     | 2     | 0.76  | 1.12  | 0.026 |
| 3.  | BD | (1) | C | 1- | C   | 3    | 891. | BD*  | (1)  | C         | 2-      | H27   | 2.40  | 1.03  | 0.044 |       |
| 4.  | BD | (1) | C | 1- | H42 | 183. | RY*  | (1)  | C    | 2         | 0.68    | 1.99  | 0.033 |       |       |       |
| 4.  | BD | (1) | C | 1- | H42 | 198. | RY*  | (1)  | C    | 3         | 0.85    | 2.22  | 0.039 |       |       |       |
| 4.  | BD | (1) | C | 1- | H42 | 873. | BD*  | (1)  | C    | 3-        | C       | 5     | 3.39  | 0.95  | 0.051 |       |
| 4.  | BD | (1) | C | 1- | H42 | 890. | BD*  | (1)  | C    | 2-        | N49     | 5.27  | 0.92  | 0.062 |       |       |
| 5.  | BD | (1) | C | 2- | H27 | 168. | RY*  | (1)  | C    | 1         | 0.88    | 2.14  | 0.039 |       |       |       |
| 5.  | BD | (1) | C | 2- | H27 | 718. | RY*  | (1)  | N49  | 2.04      | 2.39    | 0.063 |       |       |       |       |
| 5.  | BD | (1) | C | 2- | H27 | 748. | RY*  | (1)  | Ru51 | 0.79      | 18.54   | 0.109 |       |       |       |       |
| 5.  | BD | (1) | C | 2- | H27 | 755. | RY*  | (8)  | Ru51 | 0.91      | 6.62    | 0.070 |       |       |       |       |
| 5.  | BD | (1) | C | 2- | H27 | 757. | RY*  | (10) | Ru51 | 0.78      | 21.72   | 0.117 |       |       |       |       |
| 5.  | BD | (1) | C | 2- | H27 | 759. | RY*  | (12) | Ru51 | 0.80      | 15.22   | 0.099 |       |       |       |       |
| 5.  | BD | (1) | C | 2- | H27 | 764. | RY*  | (17) | Ru51 | 0.62      | 11.01   | 0.075 |       |       |       |       |
| 5.  | BD | (1) | C | 2- | H27 | 767. | RY*  | (20) | Ru51 | 0.78      | 17.68   | 0.106 |       |       |       |       |
| 5.  | BD | (1) | C | 2- | H27 | 776. | RY*  | (29) | Ru51 | 0.69      | 77.91   | 0.209 |       |       |       |       |
| 5.  | BD | (1) | C | 2- | H27 | 777. | RY*  | (30) | Ru51 | 0.54      | 26.19   | 0.107 |       |       |       |       |
| 5.  | BD | (1) | C | 2- | H27 | 780. | RY*  | (33) | Ru51 | 0.66      | 324.81  | 0.416 |       |       |       |       |
| 5.  | BD | (1) | C | 2- | H27 | 785. | RY*  | (38) | Ru51 | 0.50      | 596.64  | 0.493 |       |       |       |       |
| 5.  | BD | (1) | C | 2- | H27 | 886. | BD*  | (1)  | C    | 1-        | C       | 3     | 3.28  | 0.92  | 0.049 |       |
| 5.  | BD | (1) | C | 2- | H27 | 892. | BD*  | (1)  | C    | 7-        | N49     | 6.93  | 0.90  | 0.070 |       |       |
| 6.  | BD | (1) | C | 2- | N49 | 170. | RY*  | (3)  | C    | 1         | 0.80    | 2.62  | 0.041 |       |       |       |
| 6.  | BD | (1) | C | 2- | N49 | 188. | RY*  | (6)  | C    | 2         | 1.11    | 4.43  | 0.063 |       |       |       |
| 6.  | BD | (1) | C | 2- | N49 | 189. | RY*  | (7)  | C    | 2         | 0.62    | 5.62  | 0.053 |       |       |       |
| 6.  | BD | (1) | C | 2- | N49 | 196. | RY*  | (14) | C    | 2         | 0.63    | 40.77 | 0.144 |       |       |       |
| 6.  | BD | (1) | C | 2- | N49 | 197. | RY*  | (15) | C    | 2         | 0.89    | 26.93 | 0.139 |       |       |       |
| 6.  | BD | (1) | C | 2- | N49 | 219. | RY*  | (7)  | C    | 4         | 0.58    | 7.40  | 0.059 |       |       |       |
| 6.  | BD | (1) | C | 2- | N49 | 258. | RY*  | (1)  | C    | 7         | 0.75    | 2.32  | 0.037 |       |       |       |
| 6.  | BD | (1) | C | 2- | N49 | 260. | RY*  | (3)  | C    | 7         | 1.93    | 2.74  | 0.065 |       |       |       |
| 6.  | BD | (1) | C | 2- | N49 | 293. | RY*  | (6)  | C    | 9         | 0.70    | 4.66  | 0.051 |       |       |       |
| 6.  | BD | (1) | C | 2- | N49 | 720. | RY*  | (3)  | N49  | 0.53      | 2.89    | 0.035 |       |       |       |       |
| 6.  | BD | (1) | C | 2- | N49 | 721. | RY*  | (4)  | N49  | 1.36      | 5.32    | 0.076 |       |       |       |       |
| 6.  | BD | (1) | C | 2- | N49 | 748. | RY*  | (1)  | Ru51 | 2.15      | 18.83   | 0.180 |       |       |       |       |
| 6.  | BD | (1) | C | 2- | N49 | 750. | RY*  | (3)  | Ru51 | 1.02      | 9.03    | 0.086 |       |       |       |       |
| 6.  | BD | (1) | C | 2- | N49 | 754. | RY*  | (7)  | Ru51 | 0.53      | 4.97    | 0.046 |       |       |       |       |
| 6.  | BD | (1) | C | 2- | N49 | 755. | RY*  | (8)  | Ru51 | 2.75      | 6.91    | 0.124 |       |       |       |       |
| 6.  | BD | (1) | C | 2- | N49 | 757. | RY*  | (10) | Ru51 | 2.48      | 22.02   | 0.209 |       |       |       |       |
| 6.  | BD | (1) | C | 2- | N49 | 759. | RY*  | (12) | Ru51 | 2.95      | 15.51   | 0.192 |       |       |       |       |
| 6.  | BD | (1) | C | 2- | N49 | 760. | RY*  | (13) | Ru51 | 1.50      | 5.55    | 0.082 |       |       |       |       |
| 6.  | BD | (1) | C | 2- | N49 | 761. | RY*  | (14) | Ru51 | 1.00      | 8.30    | 0.082 |       |       |       |       |
| 6.  | BD | (1) | C | 2- | N49 | 762. | RY*  | (15) | Ru51 | 1.58      | 14.99   | 0.138 |       |       |       |       |
| 6.  | BD | (1) | C | 2- | N49 | 763. | RY*  | (16) | Ru51 | 0.70      | 13.57   | 0.087 |       |       |       |       |
| 6.  | BD | (1) | C | 2- | N49 | 764. | RY*  | (17) | Ru51 | 1.89      | 11.31   | 0.131 |       |       |       |       |
| 6.  | BD | (1) | C | 2- | N49 | 767. | RY*  | (20) | Ru51 | 2.41      | 17.98   | 0.186 |       |       |       |       |
| 6.  | BD | (1) | C | 2- | N49 | 772. | RY*  | (25) | Ru51 | 1.32      | 9406.82 | 3.159 |       |       |       |       |
| 6.  | BD | (1) | C | 2- | N49 | 773. | RY*  | (26) | Ru51 | 0.7437514 | 38      | 4.712 |       |       |       |       |
| 6.  | BD | (1) | C | 2- | N49 | 776. | RY*  | (29) | Ru51 | 2.27      | 78.20   | 0.377 |       |       |       |       |
| 6.  | BD | (1) | C | 2- | N49 | 777. | RY*  | (30) | Ru51 | 1.69      | 26.49   | 0.189 |       |       |       |       |
| 6.  | BD | (1) | C | 2- | N49 | 780. | RY*  | (33) | Ru51 | 2.17      | 325.10  | 0.752 |       |       |       |       |
| 6.  | BD | (1) | C | 2- | N49 | 785. | RY*  | (38) | Ru51 | 1.74      | 596.94  | 0.914 |       |       |       |       |
| 6.  | BD | (1) | C | 2- | N49 | 789. | RY*  | (42) | Ru51 | 1.24      | 533.54  | 0.730 |       |       |       |       |
| 6.  | BD | (1) | C | 2- | N49 | 887. | BD*  | (1)  | C    | 1-        | C       | 2     | 0.77  | 1.24  | 0.028 |       |
| 6.  | BD | (1) | C | 2- | N49 | 889. | BD*  | (1)  | C    | 1-        | H42     | 1.64  | 1.15  | 0.039 |       |       |
| 6.  | BD | (1) | C | 2- | N49 | 892. | BD*  | (1)  | C    | 7-        | N49     | 0.63  | 1.19  | 0.025 |       |       |
| 6.  | BD | (1) | C | 2- | N49 | 894. | BD*  | (1)  | C    | 7-        | C       | 9     | 2.68  | 1.19  | 0.051 |       |
| 6.  | BD | (1) | C | 2- | N49 | 913. | BD*  | (1)  | C10- | Ru51      | 4.82    | 0.88  | 0.063 |       |       |       |
| 7.  | BD | (1) | C | 3- | C   | 5    | 170. | RY*  | (3)  | C         | 1       | 0.86  | 2.51  | 0.042 |       |       |
| 7.  | BD | (1) | C | 3- | C   | 5    | 258. | RY*  | (1)  | C         | 7       | 0.67  | 2.21  | 0.035 |       |       |
| 7.  | BD | (1) | C | 3- | C   | 5    | 876. | BD*  | (1)  | C         | 5-      | C     | 7     | 1.07  | 1.12  | 0.031 |
| 7.  | BD | (1) | C | 3- | C   | 5    | 886. | BD*  | (1)  | C         | 1-      | C     | 3     | 0.77  | 1.11  | 0.026 |
| 7.  | BD | (1) | C | 3- | C   | 5    | 889. | BD*  | (1)  | C         | 1-      | H42   | 2.44  | 1.04  | 0.045 |       |
| 7.  | BD | (1) | C | 3- | C   | 5    | 894. | BD*  | (1)  | C         | 7-      | C     | 9     | 3.59  | 1.08  | 0.056 |
| 8.  | BD | (2) | C | 3- | C   | 5    | 169. | RY*  | (2)  | C         | 1       | 1.10  | 0.79  | 0.029 |       |       |
| 8.  | BD | (2) | C | 3- | C   | 5    | 263. | RY*  | (6)  | C         | 7       | 0.63  | 2.07  | 0.035 |       |       |
| 8.  | BD | (2) | C | 3- | C   | 5    | 888. | BD*  | (2)  | C         | 1-      | C     | 2     | 12.35 | 0.23  | 0.048 |
| 8.  | BD | (2) | C | 3- | C   | 5    | 893. | BD*  | (2)  | C         | 7-      | N49   | 22.41 | 0.21  | 0.064 |       |
| 9.  | BD | (1) | C | 3- | H41 | 168. | RY*  | (1)  | C    | 1         | 0.87    | 2.15  | 0.039 |       |       |       |
| 9.  | BD | (1) | C | 3- | H41 | 228. | RY*  | (1)  | C    | 5         | 0.91    | 2.02  | 0.039 |       |       |       |
| 9.  | BD | (1) | C | 3- | H41 | 876. | BD*  | (1)  | C    | 5-        | C       | 7     | 3.87  | 0.95  | 0.054 |       |
| 9.  | BD | (1) | C | 3- | H41 | 887. | BD*  | (1)  | C    | 1-        | C       | 2     | 3.37  | 0.96  | 0.051 |       |
| 12. | BD | (3) | C | 4- | O44 | 188. | RY*  | (6)  | C    | 2         | 3.44    | 4.73  | 0.114 |       |       |       |
| 12. | BD | (3) | C | 4- | O44 | 189. | RY*  | (7)  | C    | 2         | 0.57    | 5.93  | 0.052 |       |       |       |
| 12. | BD | (3) | C | 4- | O44 | 213. | RY*  | (1)  | C    | 4         | 13.96   | 3.33  | 0.193 |       |       |       |
| 12. | BD | (3) | C | 4- | O44 | 214. | RY*  | (2)  | C    | 4         | 0.96    | 2.55  | 0.044 |       |       |       |
| 12. | BD | (3) | C | 4- | O44 | 215. | RY*  | (3)  | C    | 4         | 1.04    | 2.67  | 0.047 |       |       |       |
| 12. | BD | (3) | C | 4- | O44 | 219. | RY*  | (7)  | C    | 4         | 8.20    | 7.70  | 0.225 |       |       |       |
| 12. | BD | (3) | C | 4- | O44 | 220. | RY*  | (8)  | C    | 4         | 2.15    | 5.15  | 0.094 |       |       |       |
| 12. | BD | (3) | C | 4- | O44 | 221. | RY*  | (9)  | C    | 4         | 0.71    | 4.02  | 0.048 |       |       |       |
| 12. | BD | (3) | C | 4- | O44 | 224. | RY*  | (12) | C    | 4         | 0.64    | 4.44  | 0.048 |       |       |       |
| 12. | BD | (3) | C | 4- | O44 | 227. | RY*  | (15) | C    | 4         | 0.59    | 27.69 | 0.114 |       |       |       |
| 12. | BD | (3) | C | 4- | O44 | 264. | RY*  | (7)  | C    | 7         | 1.54    | 5.11  | 0.079 |       |       |       |
| 12. | BD | (3) | C | 4- | O44 | 288. | RY*  | (1)  | C    | 9         | 0.64    | 2.52  | 0.036 |       |       |       |
| 12. | BD | (3) | C | 4- | O44 | 293. | RY*  | (6)  | C    | 9         | 1.64    | 4.97  | 0.081 |       |       |       |
| 12. | BD | (3) | C | 4- | O44 | 303. | RY*  | (1)  | C10  | 2.87      | 3.15    | 0.085 |       |       |       |       |
| 12. | BD | (3) | C | 4- | O44 | 309. | RY*  | (7)  | C10  | 1.22      | 7.76    | 0.087 |       |       |       |       |
| 12. | BD | (3) | C | 4- | O44 | 310. | RY*  | (8)  | C10  | 0.88      | 5.06    | 0.060 |       |       |       |       |
| 12. | BD | (3) | C | 4- | O44 | 315. | RY*  | (13) | C10  | 0.65      | 3.87    | 0.045 |       |       |       |       |
| 12. | BD | (3) | C | 4- | O44 | 318. | RY*  | (1)  | C11  | 1.15      | 2.32    | 0.046 |       |       |       |       |
| 12. | BD | (3) | C | 4- | O44 | 319. | RY*  | (2)  | C11  | 0.82      | 1.82    | 0.034 |       |       |       |       |
| 12. | BD | (3) | C | 4- | O44 | 321. | RY*  | (4)  | C11  | 0.87      | 3.34    | 0.048 |       |       |       |       |
| 12. | BD | (3) | C | 4- | O44 | 326. | RY*  | (9)  | C11  | 0.56      | 15.06   | 0.082 |       |       |       |       |
| 12. | BD | (3) | C | 4- | O44 | 329. | RY*  | (13) | C11  | 0.93      | 4.22    | 0.056 |       |       |       |       |
| 12. | BD | (3) | C | 4- | O44 | 330. | RY*  | (13) | C11  | 0.71      | 4.56    | 0.051 |       |       |       |       |
| 12. | BD | (3) | C | 4- | O44 | 383. | RY*  | (6)  | C15  | 3.69      | 4.55    | 0.116 |       |       |       |       |
| 12. | BD | (3) | C | 4- | O44 | 384. | RY*  | (7)  | C15  | 0.76      | 9.26    | 0.075 |       |       |       |       |
| 12. | BD | (3) | C | 4- | O44 | 595. | RY*  | (3)  | H34  | 0.67      | 2.51    | 0.037 |       |       |       |       |
| 12. | BD | (3) | C | 4- | O44 | 630. | RY*  | (3)  | H41  | 0.62      | 2.31    | 0.034 |       |       |       |       |
| 12. | BD | (3) | C | 4- | O44 | 645. | RY*  | (3)  | O44  | 1.48      | 2.84    | 0.058 |       |       |       |       |
| 12. | BD | (3) | C | 4- | O44 | 646. | RY*  | (4)  | O44  | 3.28      | 1.80    | 0.069 |       |       |       |       |
| 12. | BD | (3) | C | 4- | O44 | 647. | RY*  | (5)  | O44  | 0.61      | 3.48    | 0.041 |       |       |       |       |
| 12. | BD | (3) | C | 4- | O44 | 705. | RY*  | (3)  | O48  | 0.69      | 3.07    | 0.041 |       |       |       |       |
| 12. | BD | (3) | C | 4- | O44 | 706. | RY*  | (4)  | O48  | 1.76      | 1.79    | 0.050 |       |       |       |       |
| 12. | BD | (3) | C | 4- | O44 | 707. | RY*  | (5)  | O48  | 0.79      | 3.17    | 0.045 |       |       |       |       |
| 12. | BD | (3) | C | 4- | O44 | 718. | RY*  | (1)  | N49  | 1.35      | 2.99    | 0.057 |       |       |       |       |
| 12. | BD | (3) | C | 4- | O44 | 721. | RY*  | (4)  | N49  | 0.51      | 5.63    | 0.048 |       |       |       |       |
| 12. | BD | (3) | C | 4- | O44 | 726. | RY*  | (9)  | N49  | 0.68      | 5.59    | 0.055 |       |       |       |       |
| 12. | BD | (3) | C | 4- | O44 | 748. | RY*  | (1)  | Ru51 | 20.43     | 19.13   | 0.559 |       |       |       |       |
| 12. | BD | (3) | C | 4- | O44 | 749. | RY*  | (2)  | Ru51 | 0.56      | 1.97    | 0.030 |       |       |       |       |
| 12. | BD | (3) | C | 4- | O44 | 750. | RY*  | (3)  | Ru51 | 17.43     | 9.33    | 0.360 |       |       |       |       |
| 12. | BD | (3) | C | 4- | O44 | 752. | RY*  | (5)  | Ru51 | 13.70     | 5.24    | 0.239 |       |       |       |       |
| 12. | BD | (3) | C | 4- | O44 | 754. | RY*  | (7)  | Ru51 | 1.75      | 5.28    | 0.086 |       |       |       |       |
| 12. | BD | (3) | C | 4- | O44 | 755. | RY*  | (8)  | Ru51 | 13.53     | 7.22    | 0.279 |       |       |       |       |
| 12. | BD | (3) | C | 4- | O44 | 757. | RY*  | (10) | Ru51 | 10.46     | 22.32   | 0.432 |       |       |       |       |
| 12. | BD | (3) | C | 4- | O44 | 759. | RY*  | (12) | Ru51 | 7.50      | 15.81   | 0.308 |       |       |       |       |

|     |    |     |      |      |      |              |            |         |        |
|-----|----|-----|------|------|------|--------------|------------|---------|--------|
| 12. | BD | (3) | C 4- | O44  | 760. | RY*(13) Ru51 | 6.70       | 5.86    | 0.177  |
| 12. | BD | (3) | C 4- | O44  | 761. | RY*(14) Ru51 | 2.82       | 8.61    | 0.139  |
| 12. | BD | (3) | C 4- | O44  | 762. | RY*(15) Ru51 | 10.59      | 15.30   | 0.360  |
| 12. | BD | (3) | C 4- | O44  | 763. | RY*(16) Ru51 | 11.69      | 13.88   | 0.360  |
| 12. | BD | (3) | C 4- | O44  | 764. | RY*(17) Ru51 | 9.02       | 11.61   | 0.289  |
| 12. | BD | (3) | C 4- | O44  | 765. | RY*(18) Ru51 | 3.65       | 7.78    | 0.151  |
| 12. | BD | (3) | C 4- | O44  | 766. | RY*(19) Ru51 | 4.85       | 7.92    | 0.175  |
| 12. | BD | (3) | C 4- | O44  | 767. | RY*(20) Ru51 | 15.46      | 18.28   | 0.475  |
| 12. | BD | (3) | C 4- | O44  | 768. | RY*(21) Ru51 | 2.26       | 17.93   | 0.180  |
| 12. | BD | (3) | C 4- | O44  | 769. | RY*(22) Ru51 | 0.76       | 9.99    | 0.078  |
| 12. | BD | (3) | C 4- | O44  | 770. | RY*(23) Ru51 | 7.07       | 17.23   | 0.312  |
| 12. | BD | (3) | C 4- | O44  | 772. | RY*(25) Ru51 | 9.00       | 9407.13 | 8.222  |
| 12. | BD | (3) | C 4- | O44  | 773. | RY*(26) Ru51 | 5.0937514. | 68      | 12.355 |
| 12. | BD | (3) | C 4- | O44  | 774. | RY*(27) Ru51 | 0.81       | 50.29   | 0.180  |
| 12. | BD | (3) | C 4- | O44  | 775. | RY*(28) Ru51 | 0.50       | 187.15  | 0.274  |
| 12. | BD | (3) | C 4- | O44  | 776. | RY*(29) Ru51 | 15.62      | 78.50   | 0.990  |
| 12. | BD | (3) | C 4- | O44  | 777. | RY*(30) Ru51 | 12.72      | 26.79   | 0.522  |
| 12. | BD | (3) | C 4- | O44  | 780. | RY*(33) Ru51 | 15.33      | 325.40  | 1.996  |
| 12. | BD | (3) | C 4- | O44  | 785. | RY*(38) Ru51 | 12.19      | 597.24  | 2.412  |
| 12. | BD | (3) | C 4- | O44  | 788. | RY*(41) Ru51 | 3.05       | 90.01   | 0.468  |
| 12. | BD | (3) | C 4- | O44  | 789. | RY*(42) Ru51 | 8.62       | 533.84  | 1.917  |
| 12. | BD | (3) | C 4- | O44  | 792. | RY*(45) Ru51 | 0.72       | 52.03   | 0.173  |
| 12. | BD | (3) | C 4- | O44  | 793. | RY*(46) Ru51 | 0.58       | 187.11  | 0.294  |
| 13. | BD | (1) | C 4- | Ru51 | 213. | RY*(1) C 4   | 1.80       | 2.79    | 0.064  |
| 13. | BD | (1) | C 4- | Ru51 | 219. | RY*(7) C 4   | 1.43       | 7.15    | 0.092  |
| 13. | BD | (1) | C 4- | Ru51 | 304. | RY*(2) C10   | 1.90       | 1.44    | 0.048  |
| 13. | BD | (1) | C 4- | Ru51 | 305. | RY*(3) C10   | 2.92       | 3.14    | 0.087  |
| 13. | BD | (1) | C 4- | Ru51 | 317. | RY*(15) C10  | 0.64       | 25.95   | 0.117  |
| 13. | BD | (1) | C 4- | Ru51 | 318. | RY*(1) C11   | 1.60       | 1.77    | 0.048  |
| 13. | BD | (1) | C 4- | Ru51 | 645. | RY*(3) O44   | 1.67       | 2.29    | 0.056  |
| 13. | BD | (1) | C 4- | Ru51 | 706. | RY*(4) O48   | 0.84       | 1.25    | 0.030  |
| 13. | BD | (1) | C 4- | Ru51 | 718. | RY*(1) N49   | 4.87       | 2.44    | 0.099  |
| 13. | BD | (1) | C 4- | Ru51 | 748. | RY*(1) Ru51  | 0.62       | 18.59   | 0.097  |
| 13. | BD | (1) | C 4- | Ru51 | 750. | RY*(3) Ru51  | 0.76       | 8.79    | 0.074  |
| 13. | BD | (1) | C 4- | Ru51 | 754. | RY*(7) Ru51  | 1.19       | 4.73    | 0.068  |
| 13. | BD | (1) | C 4- | Ru51 | 756. | RY*(9) Ru51  | 0.79       | 3.14    | 0.045  |
| 13. | BD | (1) | C 4- | Ru51 | 757. | RY*(10) Ru51 | 0.58       | 21.77   | 0.102  |
| 13. | BD | (1) | C 4- | Ru51 | 759. | RY*(12) Ru51 | 1.42       | 15.27   | 0.134  |
| 13. | BD | (1) | C 4- | Ru51 | 764. | RY*(17) Ru51 | 0.52       | 11.06   | 0.069  |
| 13. | BD | (1) | C 4- | Ru51 | 767. | RY*(20) Ru51 | 0.73       | 17.73   | 0.103  |
| 13. | BD | (1) | C 4- | Ru51 | 768. | RY*(21) Ru51 | 0.60       | 17.38   | 0.093  |
| 13. | BD | (1) | C 4- | Ru51 | 777. | RY*(30) Ru51 | 0.66       | 26.24   | 0.120  |
| 13. | BD | (1) | C 4- | Ru51 | 890. | BD*(1) C 2-  | 0.61       | 0.97    | 0.022  |
| 13. | BD | (1) | C 4- | Ru51 | 892. | BD*(1) C 7-  | 0.75       | 0.95    | 0.024  |
| 13. | BD | (1) | C 4- | Ru51 | 897. | BD*(1) C 9-  | 0.56       | 1.02    | 0.022  |
| 13. | BD | (1) | C 4- | Ru51 | 900. | BD*(1) C11-  | 0.73       | 1.03    | 0.025  |
| 13. | BD | (1) | C 4- | Ru51 | 901. | BD*(2) C11-  | 0.51       | 0.55    | 0.016  |
| 13. | BD | (1) | C 4- | Ru51 | 902. | BD*(1) C11-  | 17.21      | 0.55    | 0.092  |
| 13. | BD | (1) | C 4- | Ru51 | 911. | BD*(3) C 4-  | 0.75       | 1.12    | 0.026  |
| 13. | BD | (1) | C 4- | Ru51 | 912. | BD*(1) C 4-  | 2.04       | 0.60    | 0.033  |
| 13. | BD | (1) | C 4- | Ru51 | 913. | BD*(1) C10-  | 15.87      | 0.64    | 0.096  |
| 13. | BD | (1) | C 4- | Ru51 | 914. | BD*(1) C10-  | 1.73       | 0.52    | 0.028  |
| 13. | BD | (1) | C 4- | Ru51 | 915. | BD*(2) C10-  | 1.25       | 0.52    | 0.024  |
| 13. | BD | (1) | C 4- | Ru51 | 916. | BD*(3) C10-  | 1.66       | 1.12    | 0.039  |
| 14. | BD | (1) | C 5- | C 7  | 199. | RY*(2) C 3   | 1.52       | 2.36    | 0.054  |
| 14. | BD | (1) | C 5- | C 7  | 290. | RY*(3) C 9   | 0.79       | 2.46    | 0.040  |
| 14. | BD | (1) | C 5- | C 7  | 718. | RY*(1) N49   | 0.72       | 2.57    | 0.039  |
| 14. | BD | (1) | C 5- | C 7  | 873. | BD*(1) C 3-  | 0.92       | 1.11    | 0.029  |
| 14. | BD | (1) | C 5- | C 7  | 875. | BD*(1) C 3-  | 2.31       | 1.02    | 0.043  |
| 14. | BD | (1) | C 5- | C 7  | 892. | BD*(1) C 7-  | 0.51       | 1.07    | 0.021  |
| 14. | BD | (1) | C 5- | C 7  | 894. | BD*(1) C 7-  | 1.10       | 1.07    | 0.031  |
| 14. | BD | (1) | C 5- | C 7  | 897. | BD*(1) C 9-  | 2.18       | 1.14    | 0.045  |
| 15. | BD | (1) | C 5- | H28  | 198. | RY*(1) C 3   | 0.91       | 2.22    | 0.040  |
| 15. | BD | (1) | C 5- | H28  | 258. | RY*(1) C 7   | 1.00       | 2.04    | 0.041  |
| 15. | BD | (1) | C 5- | H28  | 886. | BD*(1) C 1-  | 3.52       | 0.93    | 0.051  |
| 15. | BD | (1) | C 5- | H28  | 892. | BD*(1) C 7-  | 5.65       | 0.91    | 0.064  |
| 20. | BD | (1) | C 7- | C 9  | 228. | RY*(1) C 5   | 0.78       | 2.13    | 0.037  |
| 20. | BD | (1) | C 7- | C 9  | 318. | RY*(1) C11   | 0.98       | 1.84    | 0.038  |
| 20. | BD | (1) | C 7- | C 9  | 348. | RY*(1) C13   | 0.85       | 2.14    | 0.038  |
| 20. | BD | (1) | C 7- | C 9  | 354. | RY*(7) C13   | 0.56       | 7.85    | 0.060  |
| 20. | BD | (1) | C 7- | C 9  | 718. | RY*(1) N49   | 0.89       | 2.52    | 0.043  |
| 20. | BD | (1) | C 7- | C 9  | 754. | RY*(7) Ru51  | 0.70       | 4.80    | 0.052  |
| 20. | BD | (1) | C 7- | C 9  | 873. | BD*(1) C 3-  | 1.99       | 1.06    | 0.041  |
| 20. | BD | (1) | C 7- | C 9  | 876. | BD*(1) C 5-  | 0.99       | 1.06    | 0.029  |
| 20. | BD | (1) | C 7- | C 9  | 890. | BD*(1) C 2-  | 4.72       | 1.04    | 0.062  |
| 20. | BD | (1) | C 7- | C 9  | 895. | BD*(1) C 9-  | 0.86       | 1.08    | 0.027  |
| 20. | BD | (1) | C 7- | C 9  | 897. | BD*(1) C 9-  | 1.04       | 1.09    | 0.030  |
| 20. | BD | (1) | C 7- | C 9  | 898. | BD*(1) C13-  | 2.11       | 1.09    | 0.043  |
| 20. | BD | (1) | C 7- | C 9  | 900. | BD*(1) C11-  | 2.57       | 1.11    | 0.048  |
| 21. | BD | (1) | C 7- | N49  | 185. | RY*(3) C 2   | 2.44       | 2.55    | 0.071  |
| 21. | BD | (1) | C 7- | N49  | 233. | RY*(6) C 5   | 0.58       | 7.03    | 0.057  |
| 21. | BD | (1) | C 7- | N49  | 235. | RY*(8) C 5   | 0.51       | 3.93    | 0.040  |
| 21. | BD | (1) | C 7- | N49  | 265. | RY*(8) C 7   | 0.69       | 12.36   | 0.083  |
| 21. | BD | (1) | C 7- | N49  | 268. | RY*(11) C 7  | 0.52       | 6.27    | 0.051  |
| 21. | BD | (1) | C 7- | N49  | 271. | RY*(14) C 7  | 0.76       | 42.72   | 0.161  |
| 21. | BD | (1) | C 7- | N49  | 272. | RY*(15) C 7  | 1.01       | 24.65   | 0.141  |
| 21. | BD | (1) | C 7- | N49  | 288. | RY*(1) C 9   | 0.57       | 2.20    | 0.032  |
| 21. | BD | (1) | C 7- | N49  | 291. | RY*(4) C 9   | 0.56       | 1.92    | 0.029  |
| 21. | BD | (1) | C 7- | N49  | 720. | RY*(3) N49   | 0.95       | 2.87    | 0.047  |
| 21. | BD | (1) | C 7- | N49  | 748. | RY*(1) Ru51  | 0.54       | 18.81   | 0.090  |
| 21. | BD | (1) | C 7- | N49  | 749. | RY*(2) Ru51  | 0.78       | 1.65    | 0.032  |
| 21. | BD | (1) | C 7- | N49  | 750. | RY*(3) Ru51  | 1.05       | 9.01    | 0.087  |
| 21. | BD | (1) | C 7- | N49  | 754. | RY*(7) Ru51  | 0.99       | 4.96    | 0.063  |
| 21. | BD | (1) | C 7- | N49  | 755. | RY*(8) Ru51  | 0.56       | 6.90    | 0.056  |
| 21. | BD | (1) | C 7- | N49  | 757. | RY*(10) Ru51 | 0.60       | 22.00   | 0.103  |
| 21. | BD | (1) | C 7- | N49  | 759. | RY*(12) Ru51 | 1.21       | 15.50   | 0.123  |
| 21. | BD | (1) | C 7- | N49  | 762. | RY*(15) Ru51 | 0.79       | 14.98   | 0.097  |
| 21. | BD | (1) | C 7- | N49  | 764. | RY*(17) Ru51 | 0.52       | 11.29   | 0.069  |
| 21. | BD | (1) | C 7- | N49  | 767. | RY*(20) Ru51 | 0.72       | 17.96   | 0.102  |
| 21. | BD | (1) | C 7- | N49  | 776. | RY*(29) Ru51 | 0.73       | 78.18   | 0.215  |
| 21. | BD | (1) | C 7- | N49  | 777. | RY*(30) Ru51 | 0.63       | 26.47   | 0.116  |
| 21. | BD | (1) | C 7- | N49  | 780. | RY*(33) Ru51 | 0.70       | 325.08  | 0.427  |
| 21. | BD | (1) | C 7- | N49  | 785. | RY*(38) Ru51 | 0.54       | 596.92  | 0.508  |
| 21. | BD | (1) | C 7- | N49  | 876. | BD*(1) C 5-  | 0.99       | 1.22    | 0.031  |
| 21. | BD | (1) | C 7- | N49  | 877. | BD*(1) C 5-  | 1.67       | 1.13    | 0.039  |
| 21. | BD | (1) | C 7- | N49  | 891. | BD*(1) C 2-  | 1.81       | 1.13    | 0.040  |
| 21. | BD | (1) | C 7- | N49  | 894. | BD*(1) C 7-  | 0.64       | 1.17    | 0.024  |
| 21. | BD | (1) | C 7- | N49  | 895. | BD*(1) C 9-  | 2.30       | 1.24    | 0.048  |
| 21. | BD | (1) | C 7- | N49  | 913. | BD*(1) C10-  | 5.43       | 0.87    | 0.067  |
| 22. | BD | (2) | C 7- | N49  | 184. | RY*(2) C 2   | 2.86       | 0.94    | 0.050  |
| 22. | BD | (2) | C 7- | N49  | 229. | RY*(2) C 5   | 0.97       | 0.76    | 0.026  |
| 22. | BD | (2) | C 7- | N49  | 289. | RY*(2) C 9   | 0.67       | 0.85    | 0.023  |
| 22. | BD | (2) | C 7- | N49  | 874. | BD*(2) C 3-  | 7.48       | 0.27    | 0.041  |
| 22. | BD | (2) | C 7- | N49  | 888. | BD*(2) C 1-  | 20.33      | 0.28    | 0.067  |
| 22. | BD | (2) | C 7- | N49  | 896. | BD*(2) C 9-  | 7.39       | 0.30    | 0.044  |
| 22. | BD | (2) | C 7- | N49  | 912. | BD*(1) C 4-  | 0.55       | 0.37    | 0.013  |

|     |    |     |      |      |      |         |           |           |         |        |
|-----|----|-----|------|------|------|---------|-----------|-----------|---------|--------|
| 27. | BD | (1) | C 9- | C11  | 258. | RY*(1)  | C 7       | 0.90      | 2.16    | 0.040  |
| 27. | BD | (1) | C 9- | C11  | 290. | RY*(3)  | C 9       | 0.64      | 2.42    | 0.035  |
| 27. | BD | (1) | C 9- | C11  | 293. | RY*(6)  | C 9       | 0.82      | 4.50    | 0.055  |
| 27. | BD | (1) | C 9- | C11  | 296. | RY*(9)  | C 9       | 0.93      | 14.34   | 0.104  |
| 27. | BD | (1) | C 9- | C11  | 301. | RY*(14) | C 9       | 0.85      | 42.23   | 0.171  |
| 27. | BD | (1) | C 9- | C11  | 302. | RY*(15) | C 9       | 1.00      | 26.36   | 0.146  |
| 27. | BD | (1) | C 9- | C11  | 318. | RY*(1)  | C11       | 0.89      | 1.85    | 0.036  |
| 27. | BD | (1) | C 9- | C11  | 350. | RY*(3)  | C13       | 0.73      | 2.34    | 0.037  |
| 27. | BD | (1) | C 9- | C11  | 351. | RY*(4)  | C13       | 1.00      | 2.15    | 0.042  |
| 27. | BD | (1) | C 9- | C11  | 354. | RY*(7)  | C13       | 0.53      | 7.85    | 0.058  |
| 27. | BD | (1) | C 9- | C11  | 355. | RY*(8)  | C13       | 0.57      | 3.41    | 0.040  |
| 27. | BD | (1) | C 9- | C11  | 378. | RY*(1)  | C15       | 0.65      | 2.26    | 0.034  |
| 27. | BD | (1) | C 9- | C11  | 380. | RY*(3)  | C15       | 1.67      | 2.36    | 0.057  |
| 27. | BD | (1) | C 9- | C11  | 748. | RY*(1)  | Ru51      | 0.94      | 18.66   | 0.119  |
| 27. | BD | (1) | C 9- | C11  | 749. | RY*(2)  | Ru51      | 0.91      | 1.50    | 0.033  |
| 27. | BD | (1) | C 9- | C11  | 750. | RY*(3)  | Ru51      | 1.47      | 8.86    | 0.102  |
| 27. | BD | (1) | C 9- | C11  | 754. | RY*(7)  | Ru51      | 1.28      | 4.81    | 0.070  |
| 27. | BD | (1) | C 9- | C11  | 755. | RY*(8)  | Ru51      | 0.80      | 6.75    | 0.066  |
| 27. | BD | (1) | C 9- | C11  | 757. | RY*(10) | Ru51      | 1.29      | 21.85   | 0.151  |
| 27. | BD | (1) | C 9- | C11  | 759. | RY*(12) | Ru51      | 1.09      | 15.34   | 0.116  |
| 27. | BD | (1) | C 9- | C11  | 760. | RY*(13) | Ru51      | 0.57      | 5.38    | 0.050  |
| 27. | BD | (1) | C 9- | C11  | 761. | RY*(14) | Ru51      | 0.85      | 8.14    | 0.075  |
| 27. | BD | (1) | C 9- | C11  | 762. | RY*(15) | Ru51      | 0.85      | 14.83   | 0.101  |
| 27. | BD | (1) | C 9- | C11  | 763. | RY*(16) | Ru51      | 0.66      | 13.40   | 0.085  |
| 27. | BD | (1) | C 9- | C11  | 764. | RY*(17) | Ru51      | 0.61      | 11.14   | 0.074  |
| 27. | BD | (1) | C 9- | C11  | 767. | RY*(20) | Ru51      | 1.34      | 17.81   | 0.139  |
| 27. | BD | (1) | C 9- | C11  | 772. | RY*(25) | Ru51      | 0.58      | 9406.65 | 2.106  |
| 27. | BD | (1) | C 9- | C11  | 776. | RY*(29) | Ru51      | 1.09      | 78.03   | 0.262  |
| 27. | BD | (1) | C 9- | C11  | 777. | RY*(30) | Ru51      | 0.91      | 26.32   | 0.139  |
| 27. | BD | (1) | C 9- | C11  | 780. | RY*(33) | Ru51      | 1.04      | 324.93  | 0.524  |
| 27. | BD | (1) | C 9- | C11  | 781. | RY*(34) | Ru51      | 0.52      | 50.79   | 0.145  |
| 27. | BD | (1) | C 9- | C11  | 785. | RY*(38) | Ru51      | 0.80      | 596.77  | 0.621  |
| 27. | BD | (1) | C 9- | C11  | 789. | RY*(42) | Ru51      | 0.55      | 533.37  | 0.485  |
| 27. | BD | (1) | C 9- | C11  | 876. | BD*(1)  | C 5- C 7  | 3.48      | 1.07    | 0.054  |
| 27. | BD | (1) | C 9- | C11  | 894. | BD*(1)  | C 7- C 9  | 1.05      | 1.02    | 0.029  |
| 27. | BD | (1) | C 9- | C11  | 895. | BD*(1)  | C 9- C13  | 2.12      | 1.09    | 0.043  |
| 27. | BD | (1) | C 9- | C11  | 899. | BD*(1)  | C13- H30  | 2.30      | 1.00    | 0.043  |
| 27. | BD | (1) | C 9- | C11  | 900. | BD*(1)  | C11- C15  | 0.55      | 1.11    | 0.022  |
| 27. | BD | (1) | C 9- | C11  | 908. | BD*(1)  | C15- H33  | 2.91      | 1.01    | 0.048  |
| 28. | BD | (1) | C 9- | C13  | 260. | RY*(3)  | C 7       | 1.18      | 2.59    | 0.050  |
| 28. | BD | (1) | C 9- | C13  | 320. | RY*(3)  | C11       | 0.66      | 1.64    | 0.029  |
| 28. | BD | (1) | C 9- | C13  | 410. | RY*(3)  | C17       | 1.70      | 2.53    | 0.059  |
| 28. | BD | (1) | C 9- | C13  | 892. | BD*(1)  | C 7- N49  | 2.80      | 1.04    | 0.048  |
| 28. | BD | (1) | C 9- | C13  | 894. | BD*(1)  | C 7- C 9  | 0.96      | 1.04    | 0.028  |
| 28. | BD | (1) | C 9- | C13  | 897. | BD*(1)  | C 9- C11  | 2.18      | 1.11    | 0.044  |
| 28. | BD | (1) | C 9- | C13  | 898. | BD*(1)  | C13- C17  | 1.01      | 1.11    | 0.030  |
| 28. | BD | (1) | C 9- | C13  | 902. | BD*(1)  | C11- Ru51 | 3.18      | 0.64    | 0.043  |
| 28. | BD | (1) | C 9- | C13  | 905. | BD*(1)  | C17- H34  | 2.31      | 1.02    | 0.043  |
| 29. | BD | (2) | C 9- | C13  | 262. | RY*(5)  | C 7       | 0.52      | 2.00    | 0.032  |
| 29. | BD | (2) | C 9- | C13  | 289. | RY*(2)  | C 9       | 0.81      | 0.77    | 0.025  |
| 29. | BD | (2) | C 9- | C13  | 319. | RY*(2)  | C11       | 0.84      | 0.97    | 0.028  |
| 29. | BD | (2) | C 9- | C13  | 409. | RY*(2)  | C17       | 1.07      | 0.71    | 0.027  |
| 29. | BD | (2) | C 9- | C13  | 893. | BD*(2)  | C 7- N49  | 23.93     | 0.18    | 0.060  |
| 29. | BD | (2) | C 9- | C13  | 896. | BD*(2)  | C 9- C13  | 0.51      | 0.23    | 0.010  |
| 29. | BD | (2) | C 9- | C13  | 901. | BD*(2)  | C11- C15  | 15.34     | 0.24    | 0.055  |
| 29. | BD | (2) | C 9- | C13  | 904. | BD*(2)  | C17- C19  | 14.31     | 0.22    | 0.051  |
| 32. | BD | (3) | C10- | 048  | 188. | RY*(6)  | C 2       | 3.09      | 4.72    | 0.108  |
| 32. | BD | (3) | C10- | 048  | 213. | RY*(1)  | C 4       | 3.88      | 3.33    | 0.102  |
| 32. | BD | (3) | C10- | 048  | 219. | RY*(7)  | C 4       | 4.29      | 7.69    | 0.162  |
| 32. | BD | (3) | C10- | 048  | 264. | RY*(7)  | C 7       | 1.16      | 5.11    | 0.069  |
| 32. | BD | (3) | C10- | 048  | 288. | RY*(1)  | C 9       | 0.70      | 2.51    | 0.037  |
| 32. | BD | (3) | C10- | 048  | 293. | RY*(6)  | C 9       | 1.10      | 4.96    | 0.066  |
| 32. | BD | (3) | C10- | 048  | 303. | RY*(1)  | C10       | 12.59     | 3.15    | 0.178  |
| 32. | BD | (3) | C10- | 048  | 305. | RY*(3)  | C10       | 2.34      | 3.68    | 0.083  |
| 32. | BD | (3) | C10- | 048  | 309. | RY*(7)  | C10       | 5.49      | 7.75    | 0.184  |
| 32. | BD | (3) | C10- | 048  | 310. | RY*(8)  | C10       | 2.16      | 5.05    | 0.093  |
| 32. | BD | (3) | C10- | 048  | 316. | RY*(14) | C10       | 0.62      | 46.62   | 0.151  |
| 32. | BD | (3) | C10- | 048  | 317. | RY*(15) | C10       | 0.65      | 26.49   | 0.117  |
| 32. | BD | (3) | C10- | 048  | 318. | RY*(1)  | C11       | 1.22      | 2.31    | 0.047  |
| 32. | BD | (3) | C10- | 048  | 319. | RY*(2)  | C11       | 0.95      | 1.82    | 0.037  |
| 32. | BD | (3) | C10- | 048  | 321. | RY*(4)  | C11       | 0.58      | 3.33    | 0.039  |
| 32. | BD | (3) | C10- | 048  | 329. | RY*(12) | C11       | 0.99      | 4.22    | 0.058  |
| 32. | BD | (3) | C10- | 048  | 330. | RY*(13) | C11       | 0.63      | 4.55    | 0.048  |
| 32. | BD | (3) | C10- | 048  | 380. | RY*(3)  | C15       | 0.57      | 2.82    | 0.036  |
| 32. | BD | (3) | C10- | 048  | 383. | RY*(6)  | C15       | 4.00      | 4.54    | 0.120  |
| 32. | BD | (3) | C10- | 048  | 384. | RY*(7)  | C15       | 0.76      | 9.25    | 0.075  |
| 32. | BD | (3) | C10- | 048  | 595. | RY*(3)  | H34       | 0.68      | 2.50    | 0.037  |
| 32. | BD | (3) | C10- | 048  | 630. | RY*(3)  | H41       | 0.55      | 2.30    | 0.032  |
| 32. | BD | (3) | C10- | 048  | 646. | RY*(4)  | O44       | 2.41      | 1.79    | 0.059  |
| 32. | BD | (3) | C10- | 048  | 647. | RY*(5)  | O44       | 1.09      | 3.47    | 0.055  |
| 32. | BD | (3) | C10- | 048  | 705. | RY*(3)  | O48       | 2.17      | 3.06    | 0.073  |
| 32. | BD | (3) | C10- | 048  | 706. | RY*(4)  | O48       | 2.02      | 1.79    | 0.054  |
| 32. | BD | (3) | C10- | 048  | 718. | RY*(1)  | N49       | 0.80      | 2.98    | 0.044  |
| 32. | BD | (3) | C10- | 048  | 726. | RY*(9)  | N49       | 0.57      | 5.58    | 0.050  |
| 32. | BD | (3) | C10- | 048  | 748. | RY*(1)  | Ru51      | 19.28     | 19.13   | 0.542  |
| 32. | BD | (3) | C10- | 048  | 750. | RY*(3)  | Ru51      | 18.86     | 9.32    | 0.374  |
| 32. | BD | (3) | C10- | 048  | 751. | RY*(4)  | Ru51      | 1.21      | 2.32    | 0.047  |
| 32. | BD | (3) | C10- | 048  | 752. | RY*(5)  | Ru51      | 13.08     | 5.23    | 0.234  |
| 32. | BD | (3) | C10- | 048  | 753. | RY*(6)  | Ru51      | 4.51      | 4.18    | 0.123  |
| 32. | BD | (3) | C10- | 048  | 755. | RY*(8)  | Ru51      | 11.40     | 7.21    | 0.256  |
| 32. | BD | (3) | C10- | 048  | 757. | RY*(10) | Ru51      | 15.56     | 22.31   | 0.526  |
| 32. | BD | (3) | C10- | 048  | 759. | RY*(12) | Ru51      | 4.98      | 15.81   | 0.251  |
| 32. | BD | (3) | C10- | 048  | 760. | RY*(13) | Ru51      | 5.69      | 5.85    | 0.163  |
| 32. | BD | (3) | C10- | 048  | 761. | RY*(14) | Ru51      | 1.76      | 8.60    | 0.110  |
| 32. | BD | (3) | C10- | 048  | 762. | RY*(15) | Ru51      | 9.84      | 15.29   | 0.347  |
| 32. | BD | (3) | C10- | 048  | 763. | RY*(16) | Ru51      | 6.73      | 13.87   | 0.273  |
| 32. | BD | (3) | C10- | 048  | 764. | RY*(17) | Ru51      | 10.77     | 11.60   | 0.316  |
| 32. | BD | (3) | C10- | 048  | 765. | RY*(18) | Ru51      | 3.46      | 7.77    | 0.147  |
| 32. | BD | (3) | C10- | 048  | 766. | RY*(19) | Ru51      | 6.63      | 7.91    | 0.205  |
| 32. | BD | (3) | C10- | 048  | 767. | RY*(20) | Ru51      | 16.23     | 18.27   | 0.487  |
| 32. | BD | (3) | C10- | 048  | 768. | RY*(21) | Ru51      | 5.66      | 17.92   | 0.285  |
| 32. | BD | (3) | C10- | 048  | 770. | RY*(23) | Ru51      | 7.09      | 17.22   | 0.312  |
| 32. | BD | (3) | C10- | 048  | 772. | RY*(25) | Ru51      | 9.50      | 9407.12 | 8.451  |
| 32. | BD | (3) | C10- | 048  | 773. | RY*(26) | Ru51      | 5.3137514 | 67      | 12.616 |
| 32. | BD | (3) | C10- | 048  | 776. | RY*(29) | Ru51      | 16.35     | 78.50   | 1.012  |
| 32. | BD | (3) | C10- | 048  | 777. | RY*(30) | Ru51      | 12.36     | 26.78   | 0.514  |
| 32. | BD | (3) | C10- | 048  | 780. | RY*(33) | Ru51      | 15.74     | 325.39  | 2.023  |
| 32. | BD | (3) | C10- | 048  | 781. | RY*(34) | Ru51      | 0.72      | 51.25   | 0.172  |
| 32. | BD | (3) | C10- | 048  | 785. | RY*(38) | Ru51      | 12.72     | 597.23  | 2.464  |
| 32. | BD | (3) | C10- | 048  | 788. | RY*(41) | Ru51      | 3.15      | 90.00   | 0.476  |
| 32. | BD | (3) | C10- | 048  | 789. | RY*(42) | Ru51      | 9.08      | 533.83  | 1.967  |
| 33. | BD | (1) | C10- | Ru51 | 215. | RY*(3)  | C 4       | 1.55      | 2.13    | 0.052  |
| 33. | BD | (1) | C10- | Ru51 | 288. | RY*(1)  | C 9       | 0.51      | 1.98    | 0.029  |
| 33. | BD | (1) | C10- | Ru51 | 303. | RY*(1)  | C10       | 1.17      | 2.61    | 0.050  |
| 33. | BD | (1) | C10- | Ru51 | 309. | RY*(7)  | C10       | 0.59      | 7.21    | 0.060  |
| 33. | BD | (1) | C10- | Ru51 | 318. | RY*(1)  | C11       | 2.11      | 1.77    | 0.055  |

|     |    |     |          |      |         |          |        |         |       |
|-----|----|-----|----------|------|---------|----------|--------|---------|-------|
| 33. | BD | (1) | C10-Ru51 | 588. | RY*(1)  | H33      | 0.55   | 1.91    | 0.029 |
| 33. | BD | (1) | C10-Ru51 | 705. | RY*(3)  | O48      | 2.20   | 2.53    | 0.068 |
| 33. | BD | (1) | C10-Ru51 | 715. | RY*(13) | O48      | 0.51   | 70.42   | 0.173 |
| 33. | BD | (1) | C10-Ru51 | 721. | RY*(4)  | N49      | 0.67   | 5.09    | 0.053 |
| 33. | BD | (1) | C10-Ru51 | 897. | BD*(1)  | C 9- C11 | 1.96   | 1.03    | 0.040 |
| 33. | BD | (1) | C10-Ru51 | 902. | BD*(1)  | C11-Ru51 | 12.74  | 0.56    | 0.079 |
| 33. | BD | (1) | C10-Ru51 | 910. | BD*(2)  | C 4- O44 | 2.04   | 0.52    | 0.030 |
| 33. | BD | (1) | C10-Ru51 | 911. | BD*(3)  | C 4- O44 | 1.50   | 1.13    | 0.037 |
| 33. | BD | (1) | C10-Ru51 | 912. | BD*(1)  | C 4-Ru51 | 12.20  | 0.61    | 0.083 |
| 33. | BD | (1) | C10-Ru51 | 913. | BD*(1)  | C10-Ru51 | 0.99   | 0.65    | 0.024 |
| 33. | BD | (1) | C10-Ru51 | 916. | BD*(3)  | C10- O48 | 0.65   | 1.13    | 0.024 |
| 34. | BD | (1) | C11- C15 | 188. | RY*(6)  | C 2      | 0.70   | 4.27    | 0.049 |
| 34. | BD | (1) | C11- C15 | 213. | RY*(1)  | C 4      | 1.27   | 2.87    | 0.054 |
| 34. | BD | (1) | C11- C15 | 219. | RY*(7)  | C 4      | 1.52   | 7.24    | 0.094 |
| 34. | BD | (1) | C11- C15 | 264. | RY*(7)  | C 7      | 0.85   | 4.65    | 0.056 |
| 34. | BD | (1) | C11- C15 | 288. | RY*(1)  | C 9      | 1.97   | 2.05    | 0.057 |
| 34. | BD | (1) | C11- C15 | 290. | RY*(3)  | C 9      | 1.35   | 2.42    | 0.051 |
| 34. | BD | (1) | C11- C15 | 303. | RY*(1)  | C10      | 1.08   | 2.69    | 0.048 |
| 34. | BD | (1) | C11- C15 | 318. | RY*(1)  | C11      | 1.05   | 1.85    | 0.040 |
| 34. | BD | (1) | C11- C15 | 320. | RY*(3)  | C11      | 0.70   | 1.63    | 0.030 |
| 34. | BD | (1) | C11- C15 | 321. | RY*(4)  | C11      | 2.65   | 2.87    | 0.078 |
| 34. | BD | (1) | C11- C15 | 326. | RY*(9)  | C11      | 0.86   | 14.60   | 0.100 |
| 34. | BD | (1) | C11- C15 | 380. | RY*(3)  | C15      | 0.73   | 2.37    | 0.037 |
| 34. | BD | (1) | C11- C15 | 381. | RY*(4)  | C15      | 0.66   | 1.64    | 0.030 |
| 34. | BD | (1) | C11- C15 | 383. | RY*(6)  | C15      | 2.37   | 4.08    | 0.088 |
| 34. | BD | (1) | C11- C15 | 384. | RY*(7)  | C15      | 0.75   | 8.80    | 0.073 |
| 34. | BD | (1) | C11- C15 | 391. | RY*(14) | C15      | 0.68   | 27.48   | 0.123 |
| 34. | BD | (1) | C11- C15 | 392. | RY*(15) | C15      | 0.62   | 40.82   | 0.142 |
| 34. | BD | (1) | C11- C15 | 440. | RY*(3)  | C19      | 1.35   | 2.49    | 0.052 |
| 34. | BD | (1) | C11- C15 | 441. | RY*(4)  | C19      | 0.53   | 1.99    | 0.029 |
| 34. | BD | (1) | C11- C15 | 588. | RY*(1)  | H33      | 0.60   | 1.99    | 0.031 |
| 34. | BD | (1) | C11- C15 | 589. | RY*(2)  | H33      | 0.56   | 2.53    | 0.034 |
| 34. | BD | (1) | C11- C15 | 592. | RY*(5)  | H33      | 0.69   | 4.73    | 0.051 |
| 34. | BD | (1) | C11- C15 | 646. | RY*(4)  | O44      | 0.83   | 1.33    | 0.030 |
| 34. | BD | (1) | C11- C15 | 706. | RY*(4)  | O48      | 0.57   | 1.33    | 0.025 |
| 34. | BD | (1) | C11- C15 | 748. | RY*(1)  | Ru51     | 5.25   | 18.67   | 0.280 |
| 34. | BD | (1) | C11- C15 | 750. | RY*(3)  | Ru51     | 5.23   | 8.87    | 0.193 |
| 34. | BD | (1) | C11- C15 | 752. | RY*(5)  | Ru51     | 4.92   | 4.77    | 0.137 |
| 34. | BD | (1) | C11- C15 | 753. | RY*(6)  | Ru51     | 1.43   | 3.72    | 0.065 |
| 34. | BD | (1) | C11- C15 | 754. | RY*(7)  | Ru51     | 1.42   | 4.81    | 0.074 |
| 34. | BD | (1) | C11- C15 | 755. | RY*(8)  | Ru51     | 1.90   | 6.75    | 0.102 |
| 34. | BD | (1) | C11- C15 | 757. | RY*(10) | Ru51     | 4.06   | 21.86   | 0.267 |
| 34. | BD | (1) | C11- C15 | 758. | RY*(11) | Ru51     | 1.66   | 7.45    | 0.100 |
| 34. | BD | (1) | C11- C15 | 759. | RY*(12) | Ru51     | 3.41   | 15.35   | 0.205 |
| 34. | BD | (1) | C11- C15 | 760. | RY*(13) | Ru51     | 2.13   | 5.39    | 0.096 |
| 34. | BD | (1) | C11- C15 | 761. | RY*(14) | Ru51     | 0.81   | 8.14    | 0.073 |
| 34. | BD | (1) | C11- C15 | 762. | RY*(15) | Ru51     | 3.37   | 14.83   | 0.201 |
| 34. | BD | (1) | C11- C15 | 763. | RY*(16) | Ru51     | 3.38   | 13.41   | 0.191 |
| 34. | BD | (1) | C11- C15 | 764. | RY*(17) | Ru51     | 2.22   | 11.15   | 0.141 |
| 34. | BD | (1) | C11- C15 | 766. | RY*(19) | Ru51     | 1.80   | 7.46    | 0.104 |
| 34. | BD | (1) | C11- C15 | 767. | RY*(20) | Ru51     | 4.70   | 17.82   | 0.260 |
| 34. | BD | (1) | C11- C15 | 768. | RY*(21) | Ru51     | 3.05   | 17.47   | 0.207 |
| 34. | BD | (1) | C11- C15 | 770. | RY*(23) | Ru51     | 0.83   | 16.77   | 0.106 |
| 34. | BD | (1) | C11- C15 | 772. | RY*(25) | Ru51     | 2.63   | 9406.66 | 4.464 |
| 34. | BD | (1) | C11- C15 | 773. | RY*(26) | Ru51     | 1.5337 | 514.22  | 6.790 |
| 34. | BD | (1) | C11- C15 | 776. | RY*(29) | Ru51     | 4.52   | 78.04   | 0.533 |
| 34. | BD | (1) | C11- C15 | 777. | RY*(30) | Ru51     | 3.68   | 26.33   | 0.279 |
| 34. | BD | (1) | C11- C15 | 780. | RY*(33) | Ru51     | 4.51   | 324.94  | 1.086 |
| 34. | BD | (1) | C11- C15 | 785. | RY*(38) | Ru51     | 3.58   | 596.78  | 1.311 |
| 34. | BD | (1) | C11- C15 | 788. | RY*(41) | Ru51     | 0.95   | 89.55   | 0.261 |
| 34. | BD | (1) | C11- C15 | 789. | RY*(42) | Ru51     | 2.52   | 533.38  | 1.040 |
| 34. | BD | (1) | C11- C15 | 894. | BD*(1)  | C 7- C 9 | 3.68   | 1.03    | 0.055 |
| 34. | BD | (1) | C11- C15 | 897. | BD*(1)  | C 9- C11 | 0.68   | 1.11    | 0.025 |
| 34. | BD | (1) | C11- C15 | 906. | BD*(1)  | C19- H35 | 2.20   | 1.01    | 0.042 |
| 34. | BD | (1) | C11- C15 | 907. | BD*(1)  | C15- C19 | 1.11   | 1.09    | 0.031 |
| 34. | BD | (1) | C11- C15 | 908. | BD*(1)  | C15- H33 | 0.72   | 1.02    | 0.024 |
| 35. | BD | (2) | C11- C15 | 289. | RY*(2)  | C 9      | 1.84   | 0.76    | 0.037 |
| 35. | BD | (2) | C11- C15 | 319. | RY*(2)  | C11      | 0.56   | 0.96    | 0.023 |
| 35. | BD | (2) | C11- C15 | 439. | RY*(2)  | C19      | 1.42   | 0.73    | 0.032 |
| 35. | BD | (2) | C11- C15 | 896. | BD*(2)  | C 9- C13 | 14.86  | 0.22    | 0.051 |
| 35. | BD | (2) | C11- C15 | 904. | BD*(2)  | C17- C19 | 18.02  | 0.21    | 0.056 |
| 35. | BD | (2) | C11- C15 | 912. | BD*(1)  | C 4-Ru51 | 1.03   | 0.28    | 0.015 |
| 36. | BD | (1) | C11-Ru51 | 288. | RY*(1)  | C 9      | 0.80   | 1.80    | 0.035 |
| 36. | BD | (1) | C11-Ru51 | 304. | RY*(2)  | C10      | 0.82   | 1.27    | 0.030 |
| 36. | BD | (1) | C11-Ru51 | 305. | RY*(3)  | C10      | 2.81   | 2.97    | 0.085 |
| 36. | BD | (1) | C11-Ru51 | 378. | RY*(1)  | C15      | 0.83   | 2.01    | 0.038 |
| 36. | BD | (1) | C11-Ru51 | 380. | RY*(3)  | C15      | 0.52   | 2.12    | 0.031 |
| 36. | BD | (1) | C11-Ru51 | 718. | RY*(1)  | N49      | 3.62   | 2.28    | 0.084 |
| 36. | BD | (1) | C11-Ru51 | 876. | BD*(1)  | C 5- C 7 | 0.69   | 0.82    | 0.022 |
| 36. | BD | (1) | C11-Ru51 | 890. | BD*(1)  | C 2- N49 | 1.65   | 0.80    | 0.033 |
| 36. | BD | (1) | C11-Ru51 | 894. | BD*(1)  | C 7- C 9 | 0.61   | 0.78    | 0.020 |
| 36. | BD | (1) | C11-Ru51 | 895. | BD*(1)  | C 9- C13 | 6.53   | 0.84    | 0.068 |
| 36. | BD | (1) | C11-Ru51 | 902. | BD*(1)  | C11-Ru51 | 2.42   | 0.38    | 0.028 |
| 36. | BD | (1) | C11-Ru51 | 907. | BD*(1)  | C15- C19 | 5.66   | 0.84    | 0.064 |
| 36. | BD | (1) | C11-Ru51 | 908. | BD*(1)  | C15- H33 | 0.91   | 0.76    | 0.024 |
| 36. | BD | (1) | C11-Ru51 | 909. | BD*(1)  | C 4- O44 | 2.09   | 0.35    | 0.025 |
| 36. | BD | (1) | C11-Ru51 | 911. | BD*(3)  | C 4- O44 | 0.54   | 0.95    | 0.021 |
| 36. | BD | (1) | C11-Ru51 | 912. | BD*(1)  | C 4-Ru51 | 15.38  | 0.43    | 0.077 |
| 36. | BD | (1) | C11-Ru51 | 913. | BD*(1)  | C10-Ru51 | 16.14  | 0.47    | 0.082 |
| 36. | BD | (1) | C11-Ru51 | 914. | BD*(1)  | C10- O48 | 0.63   | 0.35    | 0.013 |
| 36. | BD | (1) | C11-Ru51 | 915. | BD*(2)  | C10- O48 | 1.85   | 0.35    | 0.023 |
| 36. | BD | (1) | C11-Ru51 | 916. | BD*(3)  | C10- O48 | 1.53   | 0.95    | 0.035 |
| 41. | BD | (1) | C13- C17 | 288. | RY*(1)  | C 9      | 0.69   | 2.07    | 0.034 |
| 41. | BD | (1) | C13- C17 | 440. | RY*(3)  | C19      | 1.04   | 2.51    | 0.046 |
| 41. | BD | (1) | C13- C17 | 894. | BD*(1)  | C 7- C 9 | 3.42   | 1.05    | 0.054 |
| 41. | BD | (1) | C13- C17 | 895. | BD*(1)  | C 9- C13 | 1.27   | 1.11    | 0.034 |
| 41. | BD | (1) | C13- C17 | 903. | BD*(1)  | C17- C19 | 0.87   | 1.10    | 0.028 |
| 41. | BD | (1) | C13- C17 | 906. | BD*(1)  | C19- H35 | 2.33   | 1.03    | 0.044 |
| 42. | BD | (1) | C13- H30 | 288. | RY*(1)  | C 9      | 1.11   | 1.91    | 0.041 |
| 42. | BD | (1) | C13- H30 | 408. | RY*(1)  | C17      | 0.96   | 2.18    | 0.041 |
| 42. | BD | (1) | C13- H30 | 897. | BD*(1)  | C 9- C11 | 5.02   | 0.96    | 0.062 |
| 42. | BD | (1) | C13- H30 | 903. | BD*(1)  | C17- C19 | 3.56   | 0.94    | 0.052 |
| 45. | BD | (1) | C15- C19 | 318. | RY*(1)  | C11      | 1.05   | 1.86    | 0.040 |
| 45. | BD | (1) | C15- C19 | 410. | RY*(3)  | C17      | 0.99   | 2.53    | 0.045 |
| 45. | BD | (1) | C15- C19 | 748. | RY*(1)  | Ru51     | 0.59   | 18.68   | 0.094 |
| 45. | BD | (1) | C15- C19 | 750. | RY*(3)  | Ru51     | 0.58   | 8.88    | 0.065 |
| 45. | BD | (1) | C15- C19 | 776. | RY*(29) | Ru51     | 0.57   | 78.05   | 0.189 |
| 45. | BD | (1) | C15- C19 | 780. | RY*(33) | Ru51     | 0.52   | 324.95  | 0.368 |
| 45. | BD | (1) | C15- C19 | 900. | BD*(1)  | C11- C15 | 1.46   | 1.13    | 0.036 |
| 45. | BD | (1) | C15- C19 | 902. | BD*(1)  | C11-Ru51 | 3.43   | 0.64    | 0.045 |
| 45. | BD | (1) | C15- C19 | 903. | BD*(1)  | C17- C19 | 0.77   | 1.09    | 0.026 |
| 45. | BD | (1) | C15- C19 | 905. | BD*(1)  | C17- H34 | 2.35   | 1.02    | 0.044 |
| 46. | BD | (1) | C15- H33 | 318. | RY*(1)  | C11      | 1.71   | 1.69    | 0.048 |
| 46. | BD | (1) | C15- H33 | 438. | RY*(1)  | C19      | 0.90   | 2.03    | 0.038 |
| 46. | BD | (1) | C15- H33 | 444. | RY*(7)  | C19      | 0.54   | 6.71    | 0.054 |
| 46. | BD | (1) | C15- H33 | 897. | BD*(1)  | C 9- C11 | 3.79   | 0.94    | 0.053 |

|      |    |     |      |     |      |     |      |      |      |       |        |       |
|------|----|-----|------|-----|------|-----|------|------|------|-------|--------|-------|
| 46.  | BD | (1) | C15- | H33 | 903. | BD* | (1)  | C17- | C19  | 3.73  | 0.92   | 0.052 |
| 50.  | BD | (1) | C17- | C19 | 350. | RY* | (3)  | C13  |      | 1.01  | 2.36   | 0.044 |
| 50.  | BD | (1) | C17- | C19 | 381. | RY* | (4)  | C15  |      | 0.71  | 1.65   | 0.031 |
| 50.  | BD | (1) | C17- | C19 | 898. | BD* | (1)  | C13- | C17  | 0.95  | 1.11   | 0.029 |
| 50.  | BD | (1) | C17- | C19 | 899. | BD* | (1)  | C13- | H30  | 2.53  | 1.01   | 0.045 |
| 50.  | BD | (1) | C17- | C19 | 907. | BD* | (1)  | C15- | C19  | 0.81  | 1.10   | 0.027 |
| 50.  | BD | (1) | C17- | C19 | 908. | BD* | (1)  | C15- | H33  | 2.17  | 1.02   | 0.042 |
| 51.  | BD | (2) | C17- | C19 | 349. | RY* | (2)  | C13  |      | 0.57  | 0.75   | 0.020 |
| 51.  | BD | (2) | C17- | C19 | 352. | RY* | (5)  | C13  |      | 0.52  | 2.01   | 0.032 |
| 51.  | BD | (2) | C17- | C19 | 379. | RY* | (2)  | C15  |      | 0.66  | 0.72   | 0.021 |
| 51.  | BD | (2) | C17- | C19 | 896. | BD* | (2)  | C 9- | C13  | 16.27 | 0.23   | 0.055 |
| 51.  | BD | (2) | C17- | C19 | 901. | BD* | (2)  | C11- | C15  | 12.38 | 0.24   | 0.050 |
| 52.  | BD | (1) | C17- | H34 | 348. | RY* | (1)  | C13  |      | 0.96  | 2.00   | 0.039 |
| 52.  | BD | (1) | C17- | H34 | 438. | RY* | (1)  | C19  |      | 0.96  | 2.05   | 0.040 |
| 52.  | BD | (1) | C17- | H34 | 895. | BD* | (1)  | C 9- | C13  | 4.02  | 0.94   | 0.055 |
| 52.  | BD | (1) | C17- | H34 | 907. | BD* | (1)  | C15- | C19  | 3.72  | 0.94   | 0.053 |
| 56.  | BD | (1) | C19- | H35 | 378. | RY* | (1)  | C15  |      | 0.89  | 2.11   | 0.039 |
| 56.  | BD | (1) | C19- | H35 | 408. | RY* | (1)  | C17  |      | 0.93  | 2.17   | 0.040 |
| 56.  | BD | (1) | C19- | H35 | 898. | BD* | (1)  | C13- | C17  | 3.66  | 0.95   | 0.053 |
| 56.  | BD | (1) | C19- | H35 | 900. | BD* | (1)  | C11- | C15  | 4.82  | 0.96   | 0.061 |
| 73.  | CR | (1) | C 1  |     | 186. | RY* | (4)  | C 2  |      | 0.91  | 11.22  | 0.090 |
| 73.  | CR | (1) | C 1  |     | 199. | RY* | (2)  | C 3  |      | 1.04  | 11.50  | 0.098 |
| 73.  | CR | (1) | C 1  |     | 890. | BD* | (1)  | C 2- | N49  | 0.68  | 10.23  | 0.075 |
| 74.  | CR | (1) | C 2  |     | 168. | RY* | (1)  | C 1  |      | 0.75  | 11.49  | 0.083 |
| 74.  | CR | (1) | C 2  |     | 170. | RY* | (3)  | C 1  |      | 0.64  | 11.68  | 0.077 |
| 74.  | CR | (1) | C 2  |     | 892. | BD* | (1)  | C 7- | N49  | 1.08  | 10.24  | 0.095 |
| 75.  | CR | (1) | C 3  |     | 170. | RY* | (3)  | C 1  |      | 1.36  | 11.65  | 0.112 |
| 75.  | CR | (1) | C 3  |     | 230. | RY* | (3)  | C 5  |      | 1.33  | 11.45  | 0.110 |
| 76.  | CR | (1) | C 4  |     | 646. | RY* | (4)  | O44  |      | 0.85  | 10.62  | 0.085 |
| 77.  | CR | (1) | C 5  |     | 199. | RY* | (2)  | C 3  |      | 1.17  | 11.50  | 0.104 |
| 77.  | CR | (1) | C 5  |     | 260. | RY* | (3)  | C 7  |      | 1.14  | 11.76  | 0.104 |
| 77.  | CR | (1) | C 5  |     | 892. | BD* | (1)  | C 7- | N49  | 0.67  | 10.21  | 0.074 |
| 77.  | CR | (1) | C 5  |     | 894. | BD* | (1)  | C 7- | C 9  | 0.93  | 10.21  | 0.087 |
| 79.  | CR | (1) | C 7  |     | 228. | RY* | (1)  | C 5  |      | 0.61  | 11.36  | 0.074 |
| 79.  | CR | (1) | C 7  |     | 288. | RY* | (1)  | C 9  |      | 0.54  | 11.27  | 0.070 |
| 79.  | CR | (1) | C 7  |     | 720. | RY* | (3)  | N49  |      | 0.54  | 11.95  | 0.072 |
| 79.  | CR | (1) | C 7  |     | 890. | BD* | (1)  | C 2- | N49  | 0.94  | 10.27  | 0.088 |
| 79.  | CR | (1) | C 7  |     | 895. | BD* | (1)  | C 9- | C13  | 0.61  | 10.32  | 0.071 |
| 79.  | CR | (1) | C 7  |     | 897. | BD* | (1)  | C 9- | C11  | 0.61  | 10.33  | 0.072 |
| 81.  | CR | (1) | C 9  |     | 258. | RY* | (1)  | C 7  |      | 0.56  | 11.33  | 0.072 |
| 81.  | CR | (1) | C 9  |     | 320. | RY* | (3)  | C11  |      | 0.86  | 10.79  | 0.086 |
| 81.  | CR | (1) | C 9  |     | 348. | RY* | (1)  | C13  |      | 0.52  | 11.31  | 0.068 |
| 81.  | CR | (1) | C 9  |     | 350. | RY* | (3)  | C13  |      | 0.59  | 11.51  | 0.073 |
| 81.  | CR | (1) | C 9  |     | 876. | BD* | (1)  | C 5- | C 7  | 0.80  | 10.24  | 0.081 |
| 81.  | CR | (1) | C 9  |     | 892. | BD* | (1)  | C 7- | N49  | 0.51  | 10.19  | 0.065 |
| 81.  | CR | (1) | C 9  |     | 902. | BD* | (1)  | C11- | Ru51 | 0.59  | 9.79   | 0.074 |
| 82.  | CR | (1) | C10  |     | 706. | RY* | (4)  | O48  |      | 0.96  | 10.61  | 0.090 |
| 83.  | CR | (1) | C11  |     | 288. | RY* | (1)  | C 9  |      | 0.53  | 11.22  | 0.069 |
| 83.  | CR | (1) | C11  |     | 290. | RY* | (3)  | C 9  |      | 0.90  | 11.59  | 0.091 |
| 83.  | CR | (1) | C11  |     | 380. | RY* | (3)  | C15  |      | 1.04  | 11.54  | 0.098 |
| 83.  | CR | (1) | C11  |     | 894. | BD* | (1)  | C 7- | C 9  | 0.68  | 10.20  | 0.075 |
| 83.  | CR | (1) | C11  |     | 895. | BD* | (1)  | C 9- | C13  | 0.73  | 10.26  | 0.078 |
| 83.  | CR | (1) | C11  |     | 902. | BD* | (1)  | C11- | Ru51 | 0.51  | 9.80   | 0.068 |
| 83.  | CR | (1) | C11  |     | 907. | BD* | (1)  | C15- | C19  | 0.59  | 10.26  | 0.070 |
| 85.  | CR | (1) | C13  |     | 290. | RY* | (3)  | C 9  |      | 0.93  | 11.58  | 0.092 |
| 85.  | CR | (1) | C13  |     | 410. | RY* | (3)  | C17  |      | 1.25  | 11.68  | 0.108 |
| 85.  | CR | (1) | C13  |     | 894. | BD* | (1)  | C 7- | C 9  | 0.77  | 10.19  | 0.079 |
| 85.  | CR | (1) | C13  |     | 897. | BD* | (1)  | C 9- | C11  | 0.92  | 10.26  | 0.087 |
| 87.  | CR | (1) | C15  |     | 320. | RY* | (3)  | C11  |      | 0.89  | 10.77  | 0.088 |
| 87.  | CR | (1) | C15  |     | 321. | RY* | (4)  | C11  |      | 0.57  | 12.02  | 0.074 |
| 87.  | CR | (1) | C15  |     | 440. | RY* | (3)  | C19  |      | 0.91  | 11.64  | 0.092 |
| 87.  | CR | (1) | C15  |     | 902. | BD* | (1)  | C11- | Ru51 | 0.79  | 9.78   | 0.085 |
| 89.  | CR | (1) | C17  |     | 350. | RY* | (3)  | C13  |      | 1.29  | 11.50  | 0.109 |
| 89.  | CR | (1) | C17  |     | 440. | RY* | (3)  | C19  |      | 1.28  | 11.64  | 0.109 |
| 89.  | CR | (1) | C17  |     | 895. | BD* | (1)  | C 9- | C13  | 0.57  | 10.25  | 0.069 |
| 91.  | CR | (1) | C19  |     | 380. | RY* | (3)  | C15  |      | 0.80  | 11.52  | 0.086 |
| 91.  | CR | (1) | C19  |     | 381. | RY* | (4)  | C15  |      | 0.61  | 10.79  | 0.073 |
| 91.  | CR | (1) | C19  |     | 410. | RY* | (3)  | C17  |      | 0.86  | 11.68  | 0.089 |
| 91.  | CR | (1) | C19  |     | 900. | BD* | (1)  | C11- | C15  | 0.86  | 10.27  | 0.084 |
| 99.  | CR | (1) | O44  |     | 213. | RY* | (1)  | C 4  |      | 4.35  | 20.84  | 0.270 |
| 99.  | CR | (1) | O44  |     | 912. | BD* | (1)  | C 4- | Ru51 | 0.70  | 18.65  | 0.112 |
| 103. | CR | (1) | O48  |     | 303. | RY* | (1)  | C10  |      | 4.87  | 20.66  | 0.284 |
| 103. | CR | (1) | O48  |     | 913. | BD* | (1)  | C10- | Ru51 | 0.61  | 18.70  | 0.104 |
| 104. | CR | (1) | N49  |     | 183. | RY* | (1)  | C 2  |      | 0.89  | 15.39  | 0.105 |
| 104. | CR | (1) | N49  |     | 185. | RY* | (3)  | C 2  |      | 0.93  | 15.68  | 0.108 |
| 104. | CR | (1) | N49  |     | 258. | RY* | (1)  | C 7  |      | 0.98  | 15.44  | 0.110 |
| 104. | CR | (1) | N49  |     | 260. | RY* | (3)  | C 7  |      | 0.97  | 15.86  | 0.111 |
| 104. | CR | (1) | N49  |     | 913. | BD* | (1)  | C10- | Ru51 | 4.69  | 14.00  | 0.250 |
| 107. | CR | (2) | Ru51 |     | 776. | RY* | (29) | Ru51 |      | 1.12  | 191.09 | 0.413 |
| 107. | CR | (2) | Ru51 |     | 780. | RY* | (33) | Ru51 |      | 2.49  | 437.99 | 0.932 |
| 107. | CR | (2) | Ru51 |     | 785. | RY* | (38) | Ru51 |      | 3.32  | 709.83 | 1.371 |
| 107. | CR | (2) | Ru51 |     | 788. | RY* | (41) | Ru51 |      | 0.81  | 202.60 | 0.361 |
| 107. | CR | (2) | Ru51 |     | 789. | RY* | (42) | Ru51 |      | 4.14  | 646.43 | 1.460 |
| 107. | CR | (2) | Ru51 |     | 911. | BD* | (3)  | C 4- | O44  | 0.87  | 114.26 | 0.282 |
| 107. | CR | (2) | Ru51 |     | 916. | BD* | (3)  | C10- | O48  | 0.98  | 114.26 | 0.299 |
| 108. | CR | (3) | Ru51 |     | 748. | RY* | (1)  | Ru51 |      | 1.47  | 40.00  | 0.217 |
| 108. | CR | (3) | Ru51 |     | 750. | RY* | (3)  | Ru51 |      | 0.84  | 30.20  | 0.142 |
| 108. | CR | (3) | Ru51 |     | 755. | RY* | (8)  | Ru51 |      | 0.61  | 28.09  | 0.117 |
| 108. | CR | (3) | Ru51 |     | 757. | RY* | (10) | Ru51 |      | 1.29  | 43.19  | 0.211 |
| 108. | CR | (3) | Ru51 |     | 759. | RY* | (12) | Ru51 |      | 0.62  | 36.69  | 0.135 |
| 108. | CR | (3) | Ru51 |     | 762. | RY* | (15) | Ru51 |      | 0.76  | 36.17  | 0.148 |
| 108. | CR | (3) | Ru51 |     | 763. | RY* | (16) | Ru51 |      | 0.54  | 34.75  | 0.122 |
| 108. | CR | (3) | Ru51 |     | 764. | RY* | (17) | Ru51 |      | 0.60  | 32.48  | 0.125 |
| 108. | CR | (3) | Ru51 |     | 767. | RY* | (20) | Ru51 |      | 1.05  | 39.15  | 0.181 |
| 108. | CR | (3) | Ru51 |     | 770. | RY* | (23) | Ru51 |      | 0.51  | 38.10  | 0.125 |
| 108. | CR | (3) | Ru51 |     | 776. | RY* | (29) | Ru51 |      | 2.83  | 99.38  | 0.473 |
| 108. | CR | (3) | Ru51 |     | 777. | RY* | (30) | Ru51 |      | 0.96  | 47.66  | 0.190 |
| 108. | CR | (3) | Ru51 |     | 780. | RY* | (33) | Ru51 |      | 4.60  | 346.27 | 1.127 |
| 108. | CR | (3) | Ru51 |     | 785. | RY* | (38) | Ru51 |      | 5.34  | 618.11 | 1.622 |
| 108. | CR | (3) | Ru51 |     | 788. | RY* | (41) | Ru51 |      | 1.97  | 110.88 | 0.417 |
| 108. | CR | (3) | Ru51 |     | 789. | RY* | (42) | Ru51 |      | 12.89 | 554.71 | 2.387 |
| 108. | CR | (3) | Ru51 |     | 890. | BD* | (1)  | C 2- | N49  | 0.81  | 22.38  | 0.121 |
| 108. | CR | (3) | Ru51 |     | 892. | BD* | (1)  | C 7- | N49  | 0.69  | 22.36  | 0.112 |
| 108. | CR | (3) | Ru51 |     | 897. | BD* | (1)  | C 9- | C11  | 0.60  | 22.44  | 0.104 |
| 108. | CR | (3) | Ru51 |     | 900. | BD* | (1)  | C11- | C15  | 1.48  | 22.45  | 0.164 |
| 108. | CR | (3) | Ru51 |     | 902. | BD* | (1)  | C11- | Ru51 | 0.77  | 21.97  | 0.125 |
| 108. | CR | (3) | Ru51 |     | 911. | BD* | (3)  | C 4- | O44  | 3.69  | 22.54  | 0.258 |
| 108. | CR | (3) | Ru51 |     | 916. | BD* | (3)  | C10- | O48  | 4.14  | 22.54  | 0.274 |
| 109. | CR | (4) | Ru51 |     | 213. | RY* | (1)  | C 4  |      | 3.22  | 6.87   | 0.133 |
| 109. | CR | (4) | Ru51 |     | 303. | RY* | (1)  | C10  |      | 3.96  | 6.69   | 0.145 |
| 109. | CR | (4) | Ru51 |     | 309. | RY* | (7)  | C10  |      | 0.55  | 11.29  | 0.070 |
| 109. | CR | (4) | Ru51 |     | 318. | RY* | (1)  | C11  |      | 0.65  | 5.85   | 0.055 |
| 109. | CR | (4) | Ru51 |     | 748. | RY* | (1)  | Ru51 |      | 1.47  | 22.67  | 0.163 |
| 109. | CR | (4) | Ru51 |     | 750. | RY* | (3)  | Ru51 |      | 0.99  | 12.87  | 0.101 |
| 109. | CR | (4) | Ru51 |     | 752. | RY* | (5)  | Ru51 |      | 0.63  | 8.77   | 0.067 |
| 109. | CR | (4) | Ru51 |     | 755. | RY* | (8)  | Ru51 |      | 0.88  | 10.75  | 0.087 |

|                       |    |      |          |      |         |           |           |         |       |
|-----------------------|----|------|----------|------|---------|-----------|-----------|---------|-------|
| 109.                  | CR | (4)  | Ru51     | 757. | RY*(10) | Ru51      | 1.39      | 25.85   | 0.169 |
| 109.                  | CR | (4)  | Ru51     | 759. | RY*(12) | Ru51      | 0.89      | 19.35   | 0.118 |
| 109.                  | CR | (4)  | Ru51     | 760. | RY*(13) | Ru51      | 0.67      | 9.39    | 0.071 |
| 109.                  | CR | (4)  | Ru51     | 762. | RY*(15) | Ru51      | 1.02      | 18.83   | 0.124 |
| 109.                  | CR | (4)  | Ru51     | 763. | RY*(16) | Ru51      | 0.87      | 17.41   | 0.110 |
| 109.                  | CR | (4)  | Ru51     | 764. | RY*(17) | Ru51      | 0.81      | 15.14   | 0.099 |
| 109.                  | CR | (4)  | Ru51     | 767. | RY*(20) | Ru51      | 1.35      | 21.81   | 0.153 |
| 109.                  | CR | (4)  | Ru51     | 770. | RY*(23) | Ru51      | 0.66      | 20.76   | 0.105 |
| 109.                  | CR | (4)  | Ru51     | 772. | RY*(25) | Ru51      | 0.54      | 9410.66 | 2.023 |
| 109.                  | CR | (4)  | Ru51     | 776. | RY*(29) | Ru51      | 1.90      | 82.04   | 0.354 |
| 109.                  | CR | (4)  | Ru51     | 777. | RY*(30) | Ru51      | 1.10      | 30.32   | 0.164 |
| 109.                  | CR | (4)  | Ru51     | 780. | RY*(33) | Ru51      | 2.05      | 328.94  | 0.735 |
| 109.                  | CR | (4)  | Ru51     | 785. | RY*(38) | Ru51      | 2.08      | 600.77  | 1.002 |
| 109.                  | CR | (4)  | Ru51     | 788. | RY*(41) | Ru51      | 0.72      | 93.54   | 0.233 |
| 109.                  | CR | (4)  | Ru51     | 789. | RY*(42) | Ru51      | 2.50      | 537.37  | 1.038 |
| 109.                  | CR | (4)  | Ru51     | 890. | BD*(1)  | C 2- N49  | 2.43      | 5.04    | 0.099 |
| 109.                  | CR | (4)  | Ru51     | 892. | BD*(1)  | C 7- N49  | 2.10      | 5.03    | 0.092 |
| 109.                  | CR | (4)  | Ru51     | 897. | BD*(1)  | C 9- C11  | 1.48      | 5.10    | 0.078 |
| 109.                  | CR | (4)  | Ru51     | 900. | BD*(1)  | C11- C15  | 4.02      | 5.11    | 0.128 |
| 109.                  | CR | (4)  | Ru51     | 902. | BD*(1)  | C11-Ru51  | 2.49      | 4.63    | 0.103 |
| 109.                  | CR | (4)  | Ru51     | 911. | BD*(3)  | C 4- O44  | 10.38     | 5.20    | 0.207 |
| 109.                  | CR | (4)  | Ru51     | 915. | BD*(2)  | C10- O48  | 0.54      | 4.60    | 0.047 |
| 109.                  | CR | (4)  | Ru51     | 916. | BD*(3)  | C10- O48  | 11.48     | 5.20    | 0.218 |
| 112.                  | CR | (7)  | Ru51     | 890. | BD*(1)  | C 2- N49  | 0.51      | 2.28    | 0.030 |
| 112.                  | CR | (7)  | Ru51     | 900. | BD*(1)  | C11- C15  | 0.57      | 2.35    | 0.033 |
| 112.                  | CR | (7)  | Ru51     | 902. | BD*(1)  | C11-Ru51  | 2.48      | 1.86    | 0.065 |
| 112.                  | CR | (7)  | Ru51     | 913. | BD*(1)  | C10-Ru51  | 3.07      | 1.95    | 0.075 |
| 112.                  | CR | (7)  | Ru51     | 916. | BD*(3)  | C10- O48  | 1.52      | 2.43    | 0.054 |
| 115.                  | CR | (10) | Ru51     | 902. | BD*(1)  | C11-Ru51  | 2.63      | 1.87    | 0.067 |
| 115.                  | CR | (10) | Ru51     | 911. | BD*(3)  | C 4- O44  | 0.92      | 2.44    | 0.042 |
| 115.                  | CR | (10) | Ru51     | 912. | BD*(1)  | C 4- Ru51 | 4.33      | 1.92    | 0.089 |
| 115.                  | CR | (10) | Ru51     | 913. | BD*(1)  | C10-Ru51  | 1.47      | 1.96    | 0.052 |
| 115.                  | CR | (10) | Ru51     | 915. | BD*(2)  | C10- O48  | 1.06      | 1.84    | 0.042 |
| 118.                  | CR | (13) | Ru51     | 902. | BD*(1)  | C11-Ru51  | 1.22      | 1.86    | 0.046 |
| 118.                  | CR | (13) | Ru51     | 911. | BD*(3)  | C 4- O44  | 1.61      | 2.43    | 0.056 |
| 118.                  | CR | (13) | Ru51     | 912. | BD*(1)  | C 4- Ru51 | 3.75      | 1.91    | 0.083 |
| 118.                  | CR | (13) | Ru51     | 913. | BD*(1)  | C10-Ru51  | 1.52      | 1.95    | 0.053 |
| 118.                  | CR | (13) | Ru51     | 914. | BD*(1)  | C10- O48  | 0.62      | 1.83    | 0.032 |
| 118.                  | CR | (13) | Ru51     | 916. | BD*(3)  | C10- O48  | 0.85      | 2.44    | 0.041 |
| 148.                  | LP | (1)  | O44      | 213. | RY*(1)  | C 4       | 6.15      | 2.94    | 0.120 |
| 148.                  | LP | (1)  | O44      | 215. | RY*(3)  | C 4       | 0.99      | 2.28    | 0.043 |
| 148.                  | LP | (1)  | O44      | 219. | RY*(7)  | C 4       | 0.76      | 7.31    | 0.067 |
| 148.                  | LP | (1)  | O44      | 220. | RY*(8)  | C 4       | 0.77      | 4.76    | 0.054 |
| 148.                  | LP | (1)  | O44      | 912. | BD*(1)  | C 4- Ru51 | 3.29      | 0.76    | 0.049 |
| 154.                  | LP | (1)  | O48      | 303. | RY*(1)  | C10       | 7.84      | 2.76    | 0.131 |
| 154.                  | LP | (1)  | O48      | 310. | RY*(8)  | C10       | 1.58      | 4.66    | 0.077 |
| 154.                  | LP | (1)  | O48      | 913. | BD*(1)  | C10-Ru51  | 3.10      | 0.79    | 0.048 |
| 155.                  | LP | (1)  | N49      | 183. | RY*(1)  | C 2       | 2.01      | 1.87    | 0.060 |
| 155.                  | LP | (1)  | N49      | 185. | RY*(3)  | C 2       | 0.90      | 2.16    | 0.043 |
| 155.                  | LP | (1)  | N49      | 258. | RY*(1)  | C 7       | 1.93      | 1.92    | 0.059 |
| 155.                  | LP | (1)  | N49      | 260. | RY*(3)  | C 7       | 1.21      | 2.34    | 0.052 |
| 155.                  | LP | (1)  | N49      | 305. | RY*(3)  | C10       | 0.57      | 2.99    | 0.040 |
| 155.                  | LP | (1)  | N49      | 748. | RY*(1)  | Ru51      | 1.31      | 18.43   | 0.152 |
| 155.                  | LP | (1)  | N49      | 750. | RY*(3)  | Ru51      | 1.01      | 8.63    | 0.091 |
| 155.                  | LP | (1)  | N49      | 755. | RY*(8)  | Ru51      | 1.24      | 6.51    | 0.088 |
| 155.                  | LP | (1)  | N49      | 757. | RY*(10) | Ru51      | 1.45      | 21.62   | 0.173 |
| 155.                  | LP | (1)  | N49      | 762. | RY*(15) | Ru51      | 0.77      | 14.59   | 0.104 |
| 155.                  | LP | (1)  | N49      | 764. | RY*(17) | Ru51      | 1.00      | 10.90   | 0.102 |
| 155.                  | LP | (1)  | N49      | 767. | RY*(20) | Ru51      | 1.26      | 17.58   | 0.146 |
| 155.                  | LP | (1)  | N49      | 776. | RY*(29) | Ru51      | 1.01      | 77.80   | 0.274 |
| 155.                  | LP | (1)  | N49      | 777. | RY*(30) | Ru51      | 0.90      | 26.08   | 0.150 |
| 155.                  | LP | (1)  | N49      | 780. | RY*(33) | Ru51      | 0.91      | 324.70  | 0.533 |
| 155.                  | LP | (1)  | N49      | 785. | RY*(38) | Ru51      | 0.67      | 596.54  | 0.617 |
| 155.                  | LP | (1)  | N49      | 876. | BD*(1)  | C 5- C 7  | 7.26      | 0.83    | 0.076 |
| 155.                  | LP | (1)  | N49      | 887. | BD*(1)  | C 1- C 2  | 6.78      | 0.84    | 0.073 |
| 155.                  | LP | (1)  | N49      | 891. | BD*(1)  | C 2- H27  | 2.62      | 0.75    | 0.043 |
| 155.                  | LP | (1)  | N49      | 894. | BD*(1)  | C 7- C 9  | 1.67      | 0.79    | 0.035 |
| 155.                  | LP | (1)  | N49      | 895. | BD*(1)  | C 9- C13  | 0.53      | 0.85    | 0.021 |
| 155.                  | LP | (1)  | N49      | 900. | BD*(1)  | C11- C15  | 1.55      | 0.88    | 0.036 |
| 155.                  | LP | (1)  | N49      | 902. | BD*(1)  | C11-Ru51  | 1.70      | 0.39    | 0.023 |
| 155.                  | LP | (1)  | N49      | 910. | BD*(2)  | C 4- O44  | 0.98      | 0.35    | 0.017 |
| 155.                  | LP | (1)  | N49      | 911. | BD*(3)  | C 4- O44  | 1.08      | 0.96    | 0.031 |
| 155.                  | LP | (1)  | N49      | 913. | BD*(1)  | C10-Ru51  | 74.90     | 0.48    | 0.170 |
| 157.                  | LP | (1)  | Ru51     | 216. | RY*(4)  | C 4       | 0.93      | 1.99    | 0.041 |
| 157.                  | LP | (1)  | Ru51     | 306. | RY*(4)  | C10       | 1.25      | 1.98    | 0.047 |
| 157.                  | LP | (1)  | Ru51     | 319. | RY*(2)  | C11       | 0.55      | 0.95    | 0.022 |
| 157.                  | LP | (1)  | Ru51     | 320. | RY*(3)  | C11       | 0.67      | 1.22    | 0.027 |
| 157.                  | LP | (1)  | Ru51     | 720. | RY*(3)  | N49       | 1.80      | 2.32    | 0.061 |
| 157.                  | LP | (1)  | Ru51     | 900. | BD*(1)  | C11- C15  | 0.57      | 0.71    | 0.019 |
| 157.                  | LP | (1)  | Ru51     | 901. | BD*(2)  | C11- C15  | 2.40      | 0.23    | 0.021 |
| 157.                  | LP | (1)  | Ru51     | 909. | BD*(1)  | C 4- O44  | 8.39      | 0.19    | 0.036 |
| 157.                  | LP | (1)  | Ru51     | 914. | BD*(1)  | C10- O48  | 8.65      | 0.19    | 0.037 |
| 157.                  | LP | (1)  | Ru51     | 915. | BD*(2)  | C10- O48  | 11.09     | 0.20    | 0.042 |
| 158.                  | LP | (2)  | Ru51     | 216. | RY*(4)  | C 4       | 1.92      | 2.00    | 0.060 |
| 158.                  | LP | (2)  | Ru51     | 306. | RY*(4)  | C10       | 0.94      | 1.99    | 0.042 |
| 158.                  | LP | (2)  | Ru51     | 319. | RY*(2)  | C11       | 1.55      | 0.96    | 0.037 |
| 158.                  | LP | (2)  | Ru51     | 320. | RY*(3)  | C11       | 0.53      | 1.22    | 0.024 |
| 158.                  | LP | (2)  | Ru51     | 720. | RY*(3)  | N49       | 0.72      | 2.33    | 0.040 |
| 158.                  | LP | (2)  | Ru51     | 901. | BD*(2)  | C11- C15  | 4.27      | 0.23    | 0.028 |
| 158.                  | LP | (2)  | Ru51     | 902. | BD*(1)  | C11-Ru51  | 1.11      | 0.23    | 0.014 |
| 158.                  | LP | (2)  | Ru51     | 909. | BD*(1)  | C 4- O44  | 19.98     | 0.20    | 0.056 |
| 158.                  | LP | (2)  | Ru51     | 914. | BD*(1)  | C10- O48  | 2.78      | 0.20    | 0.021 |
| 158.                  | LP | (2)  | Ru51     | 915. | BD*(2)  | C10- O48  | 6.54      | 0.20    | 0.033 |
| 159.                  | LP | (3)  | Ru51     | 214. | RY*(2)  | C 4       | 2.13      | 1.70    | 0.059 |
| 159.                  | LP | (3)  | Ru51     | 304. | RY*(2)  | C10       | 2.65      | 1.13    | 0.053 |
| 159.                  | LP | (3)  | Ru51     | 719. | RY*(2)  | N49       | 2.52      | 1.07    | 0.051 |
| 159.                  | LP | (3)  | Ru51     | 893. | BD*(2)  | C 7- N49  | 3.74      | 0.18    | 0.024 |
| 159.                  | LP | (3)  | Ru51     | 909. | BD*(1)  | C 4- O44  | 0.70      | 0.21    | 0.011 |
| 159.                  | LP | (3)  | Ru51     | 910. | BD*(2)  | C 4- O44  | 23.68     | 0.20    | 0.064 |
| 159.                  | LP | (3)  | Ru51     | 914. | BD*(1)  | C10- O48  | 14.27     | 0.21    | 0.050 |
| 159.                  | LP | (3)  | Ru51     | 915. | BD*(2)  | C10- O48  | 8.68      | 0.21    | 0.039 |
| from unit 1 to unit 2 |    |      |          |      |         |           |           |         |       |
| 1.                    | BD | (1)  | C 1- C 2 | 570. | RY*(3)  | H29       | 0.11      | 2.08    | 0.013 |
| 1.                    | BD | (1)  | C 1- C 2 | 805. | RY*(10) | Ru52      | 62.56     | 0.01    | 0.025 |
| 2.                    | BD | (2)  | C 1- C 2 | 884. | BD*(2)  | C 6- O46  | 0.07      | 0.23    | 0.004 |
| 4.                    | BD | (1)  | C 1- H42 | 796. | RY*(1)  | Ru52      | 0.23      | 0.34    | 0.008 |
| 4.                    | BD | (1)  | C 1- H42 | 797. | RY*(2)  | Ru52      | 0.05      | 0.95    | 0.006 |
| 5.                    | BD | (1)  | C 2- H27 | 570. | RY*(3)  | H29       | 0.12      | 1.90    | 0.014 |
| 5.                    | BD | (1)  | C 2- H27 | 799. | RY*(4)  | Ru52      | 0.09      | 2.19    | 0.012 |
| 5.                    | BD | (1)  | C 2- H27 | 811. | RY*(16) | Ru52      | 0.07      | 6.49    | 0.020 |
| 5.                    | BD | (1)  | C 2- H27 | 820. | RY*(25) | Ru52      | 0.08      | 765.54  | 0.229 |
| 5.                    | BD | (1)  | C 2- H27 | 821. | RY*(26) | Ru52      | 0.0812899 | 0.80    | 0.905 |
| 5.                    | BD | (1)  | C 2- H27 | 833. | RY*(38) | Ru52      | 0.09      | 3361.89 | 0.498 |
| 5.                    | BD | (1)  | C 2- H27 | 836. | RY*(41) | Ru52      | 0.05      | 777.18  | 0.183 |
| 5.                    | BD | (1)  | C 2- H27 | 884. | BD*(2)  | C 6- O46  | 0.12      | 0.46    | 0.007 |



|     |    |     |      |      |      |         |          |           |         |       |
|-----|----|-----|------|------|------|---------|----------|-----------|---------|-------|
| 6.  | BD | (1) | C 2- | N49  | 338. | RY*(6)  | C12      | 0.11      | 3.55    | 0.018 |
| 6.  | BD | (1) | C 2- | N49  | 569. | RY*(2)  | H29      | 0.06      | 2.69    | 0.011 |
| 6.  | BD | (1) | C 2- | N49  | 570. | RY*(3)  | H29      | 0.27      | 2.19    | 0.022 |
| 6.  | BD | (1) | C 2- | N49  | 796. | RY*(1)  | Ru52     | 0.15      | 0.62    | 0.009 |
| 6.  | BD | (1) | C 2- | N49  | 797. | RY*(2)  | Ru52     | 0.07      | 1.23    | 0.008 |
| 6.  | BD | (1) | C 2- | N49  | 799. | RY*(4)  | Ru52     | 0.07      | 2.49    | 0.012 |
| 6.  | BD | (1) | C 2- | N49  | 805. | RY*(10) | Ru52     | 14.25     | 0.13    | 0.038 |
| 6.  | BD | (1) | C 2- | N49  | 811. | RY*(16) | Ru52     | 0.07      | 6.78    | 0.019 |
| 6.  | BD | (1) | C 2- | N49  | 813. | RY*(18) | Ru52     | 0.14      | 6.23    | 0.026 |
| 6.  | BD | (1) | C 2- | N49  | 833. | RY*(38) | Ru52     | 0.05      | 3362.19 | 0.373 |
| 7.  | BD | (1) | C 3- | C 5  | 805. | RY*(10) | Ru52     | 3.00      | 0.01    | 0.006 |
| 10. | BD | (1) | C 4- | O44  | 796. | RY*(1)  | Ru52     | 0.73      | 0.23    | 0.012 |
| 10. | BD | (1) | C 4- | O44  | 797. | RY*(2)  | Ru52     | 0.39      | 0.85    | 0.016 |
| 10. | BD | (1) | C 4- | O44  | 801. | RY*(6)  | Ru52     | 0.05      | 1.50    | 0.008 |
| 10. | BD | (1) | C 4- | O44  | 814. | RY*(19) | Ru52     | 0.06      | 5.57    | 0.017 |
| 10. | BD | (1) | C 4- | O44  | 820. | RY*(25) | Ru52     | 0.06      | 765.45  | 0.190 |
| 10. | BD | (1) | C 4- | O44  | 821. | RY*(26) | Ru52     | 0.0612899 | 7.1     | 0.756 |
| 10. | BD | (1) | C 4- | O44  | 833. | RY*(38) | Ru52     | 0.06      | 3361.80 | 0.415 |
| 10. | BD | (1) | C 4- | O44  | 840. | RY*(45) | Ru52     | 0.05      | 51.20   | 0.045 |
| 12. | BD | (3) | C 4- | O44  | 255. | RY*(13) | C 6      | 0.05      | 3.76    | 0.012 |
| 12. | BD | (3) | C 4- | O44  | 285. | RY*(13) | C 8      | 0.13      | 3.69    | 0.020 |
| 12. | BD | (3) | C 4- | O44  | 338. | RY*(6)  | C12      | 0.58      | 3.85    | 0.042 |
| 12. | BD | (3) | C 4- | O44  | 341. | RY*(9)  | C12      | 0.09      | 5.85    | 0.021 |
| 12. | BD | (3) | C 4- | O44  | 344. | RY*(12) | C12      | 0.07      | 3.70    | 0.014 |
| 12. | BD | (3) | C 4- | O44  | 364. | RY*(2)  | C14      | 0.24      | 1.65    | 0.018 |
| 12. | BD | (3) | C 4- | O44  | 373. | RY*(11) | C14      | 0.10      | 3.75    | 0.018 |
| 12. | BD | (3) | C 4- | O44  | 393. | RY*(1)  | C16      | 0.06      | 2.12    | 0.010 |
| 12. | BD | (3) | C 4- | O44  | 396. | RY*(4)  | C16      | 0.05      | 3.23    | 0.011 |
| 12. | BD | (3) | C 4- | O44  | 568. | RY*(1)  | H29      | 0.59      | 2.34    | 0.033 |
| 12. | BD | (3) | C 4- | O44  | 569. | RY*(2)  | H29      | 0.15      | 2.99    | 0.019 |
| 12. | BD | (3) | C 4- | O44  | 570. | RY*(3)  | H29      | 1.89      | 2.49    | 0.061 |
| 12. | BD | (3) | C 4- | O44  | 734. | RY*(2)  | N50      | 0.11      | 1.91    | 0.013 |
| 12. | BD | (3) | C 4- | O44  | 735. | RY*(3)  | N50      | 0.10      | 3.20    | 0.016 |
| 12. | BD | (3) | C 4- | O44  | 796. | RY*(1)  | Ru52     | 1.53      | 0.92    | 0.034 |
| 12. | BD | (3) | C 4- | O44  | 797. | RY*(2)  | Ru52     | 0.20      | 1.54    | 0.016 |
| 12. | BD | (3) | C 4- | O44  | 799. | RY*(4)  | Ru52     | 0.55      | 2.79    | 0.035 |
| 12. | BD | (3) | C 4- | O44  | 800. | RY*(5)  | Ru52     | 0.15      | 4.09    | 0.022 |
| 12. | BD | (3) | C 4- | O44  | 804. | RY*(9)  | Ru52     | 0.23      | 3.27    | 0.025 |
| 12. | BD | (3) | C 4- | O44  | 805. | RY*(10) | Ru52     | 14.90     | 0.43    | 0.071 |
| 12. | BD | (3) | C 4- | O44  | 809. | RY*(14) | Ru52     | 0.06      | 6.31    | 0.017 |
| 12. | BD | (3) | C 4- | O44  | 811. | RY*(16) | Ru52     | 0.18      | 7.09    | 0.032 |
| 12. | BD | (3) | C 4- | O44  | 812. | RY*(17) | Ru52     | 0.08      | 4.98    | 0.017 |
| 12. | BD | (3) | C 4- | O44  | 813. | RY*(18) | Ru52     | 0.33      | 6.53    | 0.041 |
| 12. | BD | (3) | C 4- | O44  | 816. | RY*(21) | Ru52     | 0.05      | 14.43   | 0.025 |
| 12. | BD | (3) | C 4- | O44  | 833. | RY*(38) | Ru52     | 0.05      | 3362.49 | 0.378 |
| 13. | BD | (1) | C 4- | Ru51 | 338. | RY*(6)  | C12      | 0.11      | 3.31    | 0.018 |
| 13. | BD | (1) | C 4- | Ru51 | 364. | RY*(2)  | C14      | 0.11      | 1.10    | 0.010 |
| 13. | BD | (1) | C 4- | Ru51 | 570. | RY*(3)  | H29      | 0.17      | 1.95    | 0.017 |
| 13. | BD | (1) | C 4- | Ru51 | 796. | RY*(1)  | Ru52     | 1.82      | 0.38    | 0.024 |
| 13. | BD | (1) | C 4- | Ru51 | 799. | RY*(4)  | Ru52     | 0.44      | 2.25    | 0.029 |
| 13. | BD | (1) | C 4- | Ru51 | 800. | RY*(5)  | Ru52     | 0.05      | 3.54    | 0.012 |
| 13. | BD | (1) | C 4- | Ru51 | 801. | RY*(6)  | Ru52     | 0.08      | 1.65    | 0.010 |
| 13. | BD | (1) | C 4- | Ru51 | 816. | RY*(21) | Ru52     | 0.05      | 13.88   | 0.025 |
| 13. | BD | (1) | C 4- | Ru51 | 834. | RY*(39) | Ru52     | 0.05      | 18.44   | 0.028 |
| 13. | BD | (1) | C 4- | Ru51 | 881. | BD*(1)  | C 8-Ru52 | 0.10      | 0.59    | 0.007 |
| 13. | BD | (1) | C 4- | Ru51 | 926. | BD*(1)  | C16-Ru52 | 0.09      | 0.53    | 0.006 |
| 21. | BD | (1) | C 7- | N49  | 568. | RY*(1)  | H29      | 0.07      | 2.02    | 0.010 |
| 21. | BD | (1) | C 7- | N49  | 570. | RY*(3)  | H29      | 0.10      | 2.17    | 0.013 |
| 21. | BD | (1) | C 7- | N49  | 796. | RY*(1)  | Ru52     | 0.77      | 0.61    | 0.019 |
| 21. | BD | (1) | C 7- | N49  | 797. | RY*(2)  | Ru52     | 0.22      | 1.22    | 0.015 |
| 21. | BD | (1) | C 7- | N49  | 798. | RY*(3)  | Ru52     | 0.06      | 1.46    | 0.008 |
| 21. | BD | (1) | C 7- | N49  | 805. | RY*(10) | Ru52     | 0.43      | 0.11    | 0.006 |
| 21. | BD | (1) | C 7- | N49  | 818. | RY*(23) | Ru52     | 0.07      | 7.30    | 0.020 |
| 21. | BD | (1) | C 7- | N49  | 820. | RY*(25) | Ru52     | 0.07      | 765.82  | 0.210 |
| 21. | BD | (1) | C 7- | N49  | 821. | RY*(26) | Ru52     | 0.0612900 | 0.8     | 0.816 |
| 21. | BD | (1) | C 7- | N49  | 833. | RY*(38) | Ru52     | 0.08      | 3362.17 | 0.451 |
| 22. | BD | (2) | C 7- | N49  | 796. | RY*(1)  | Ru52     | 0.50      | 0.15    | 0.008 |
| 22. | BD | (2) | C 7- | N49  | 798. | RY*(3)  | Ru52     | 0.06      | 1.00    | 0.007 |
| 22. | BD | (2) | C 7- | N49  | 803. | RY*(8)  | Ru52     | 0.06      | 1.38    | 0.009 |
| 22. | BD | (2) | C 7- | N49  | 818. | RY*(23) | Ru52     | 0.05      | 6.84    | 0.018 |
| 27. | BD | (1) | C 9- | C11  | 568. | RY*(1)  | H29      | 0.06      | 1.87    | 0.010 |
| 27. | BD | (1) | C 9- | C11  | 570. | RY*(3)  | H29      | 0.16      | 2.02    | 0.016 |
| 27. | BD | (1) | C 9- | C11  | 796. | RY*(1)  | Ru52     | 1.00      | 0.45    | 0.019 |
| 27. | BD | (1) | C 9- | C11  | 797. | RY*(2)  | Ru52     | 0.19      | 1.07    | 0.013 |
| 29. | BD | (2) | C 9- | C13  | 796. | RY*(1)  | Ru52     | 0.08      | 0.07    | 0.002 |
| 31. | BD | (2) | C10- | O48  | 334. | RY*(2)  | C12      | 0.17      | 1.05    | 0.012 |
| 31. | BD | (2) | C10- | O48  | 336. | RY*(4)  | C12      | 0.12      | 1.70    | 0.013 |
| 31. | BD | (2) | C10- | O48  | 347. | RY*(15) | C12      | 0.06      | 26.55   | 0.036 |
| 31. | BD | (2) | C10- | O48  | 364. | RY*(2)  | C14      | 0.06      | 0.97    | 0.007 |
| 31. | BD | (2) | C10- | O48  | 570. | RY*(3)  | H29      | 0.09      | 1.81    | 0.012 |
| 31. | BD | (2) | C10- | O48  | 796. | RY*(1)  | Ru52     | 0.40      | 0.24    | 0.009 |
| 31. | BD | (2) | C10- | O48  | 797. | RY*(2)  | Ru52     | 0.07      | 0.86    | 0.007 |
| 31. | BD | (2) | C10- | O48  | 864. | BD*(2)  | C12-C14  | 0.06      | 0.37    | 0.005 |
| 32. | BD | (3) | C10- | O48  | 253. | RY*(11) | C 6      | 0.06      | 2.91    | 0.012 |
| 32. | BD | (3) | C10- | O48  | 255. | RY*(13) | C 6      | 0.08      | 3.75    | 0.016 |
| 32. | BD | (3) | C10- | O48  | 273. | RY*(1)  | C 8      | 0.07      | 2.42    | 0.012 |
| 32. | BD | (3) | C10- | O48  | 279. | RY*(7)  | C 8      | 0.09      | 5.40    | 0.020 |
| 32. | BD | (3) | C10- | O48  | 285. | RY*(13) | C 8      | 0.10      | 3.68    | 0.017 |
| 32. | BD | (3) | C10- | O48  | 334. | RY*(2)  | C12      | 0.06      | 1.72    | 0.009 |
| 32. | BD | (3) | C10- | O48  | 336. | RY*(4)  | C12      | 0.21      | 2.37    | 0.020 |
| 32. | BD | (3) | C10- | O48  | 338. | RY*(6)  | C12      | 0.62      | 3.84    | 0.043 |
| 32. | BD | (3) | C10- | O48  | 341. | RY*(9)  | C12      | 0.14      | 5.84    | 0.026 |
| 32. | BD | (3) | C10- | O48  | 343. | RY*(11) | C12      | 0.07      | 5.74    | 0.017 |
| 32. | BD | (3) | C10- | O48  | 344. | RY*(12) | C12      | 0.12      | 3.69    | 0.019 |
| 32. | BD | (3) | C10- | O48  | 364. | RY*(2)  | C14      | 0.18      | 1.64    | 0.015 |
| 32. | BD | (3) | C10- | O48  | 373. | RY*(11) | C14      | 0.08      | 3.74    | 0.016 |
| 32. | BD | (3) | C10- | O48  | 393. | RY*(1)  | C16      | 0.07      | 2.11    | 0.011 |
| 32. | BD | (3) | C10- | O48  | 457. | RY*(5)  | C20      | 0.05      | 2.80    | 0.011 |
| 32. | BD | (3) | C10- | O48  | 568. | RY*(1)  | H29      | 0.70      | 2.33    | 0.036 |
| 32. | BD | (3) | C10- | O48  | 569. | RY*(2)  | H29      | 0.25      | 2.98    | 0.025 |
| 32. | BD | (3) | C10- | O48  | 570. | RY*(3)  | H29      | 2.13      | 2.48    | 0.065 |
| 32. | BD | (3) | C10- | O48  | 580. | RY*(3)  | H31      | 0.07      | 2.17    | 0.011 |
| 32. | BD | (3) | C10- | O48  | 734. | RY*(2)  | N50      | 0.15      | 1.90    | 0.015 |
| 32. | BD | (3) | C10- | O48  | 735. | RY*(3)  | N50      | 0.07      | 3.19    | 0.014 |
| 32. | BD | (3) | C10- | O48  | 740. | RY*(8)  | N50      | 0.08      | 15.80   | 0.031 |
| 32. | BD | (3) | C10- | O48  | 745. | RY*(13) | N50      | 0.07      | 6.13    | 0.019 |
| 32. | BD | (3) | C10- | O48  | 796. | RY*(1)  | Ru52     | 3.61      | 0.92    | 0.051 |
| 32. | BD | (3) | C10- | O48  | 797. | RY*(2)  | Ru52     | 0.85      | 1.53    | 0.032 |
| 32. | BD | (3) | C10- | O48  | 798. | RY*(3)  | Ru52     | 0.08      | 1.77    | 0.011 |
| 32. | BD | (3) | C10- | O48  | 799. | RY*(4)  | Ru52     | 0.32      | 2.78    | 0.027 |
| 32. | BD | (3) | C10- | O48  | 800. | RY*(5)  | Ru52     | 0.22      | 4.08    | 0.027 |
| 32. | BD | (3) | C10- | O48  | 804. | RY*(9)  | Ru52     | 0.14      | 3.26    | 0.019 |
| 32. | BD | (3) | C10- | O48  | 805. | RY*(10) | Ru52     | 4.29      | 0.42    | 0.038 |
| 32. | BD | (3) | C10- | O48  | 809. | RY*(14) | Ru52     | 0.08      | 6.30    | 0.020 |
| 32. | BD | (3) | C10- | O48  | 811. | RY*(16) | Ru52     | 0.05      | 7.08    | 0.017 |
| 32. | BD | (3) | C10- | O48  | 813. | RY*(18) | Ru52     | 0.34      | 6.52    | 0.042 |

|      |    |      |          |      |                  |           |         |       |
|------|----|------|----------|------|------------------|-----------|---------|-------|
| 32.  | BD | ( 3) | C10- O48 | 814. | RY*(19) Ru52     | 0.24      | 6.25    | 0.035 |
| 32.  | BD | ( 3) | C10- O48 | 818. | RY*(23) Ru52     | 0.08      | 7.61    | 0.022 |
| 32.  | BD | ( 3) | C10- O48 | 834. | RY*(39) Ru52     | 0.07      | 18.98   | 0.032 |
| 33.  | BD | ( 1) | C10-Ru51 | 334. | RY*( 2) C12      | 0.30      | 1.19    | 0.017 |
| 33.  | BD | ( 1) | C10-Ru51 | 336. | RY*( 4) C12      | 0.11      | 1.84    | 0.013 |
| 33.  | BD | ( 1) | C10-Ru51 | 796. | RY*( 1) Ru52     | 0.72      | 0.38    | 0.015 |
| 33.  | BD | ( 1) | C10-Ru51 | 798. | RY*( 3) Ru52     | 0.08      | 1.23    | 0.009 |
| 33.  | BD | ( 1) | C10-Ru51 | 799. | RY*( 4) Ru52     | 0.20      | 2.25    | 0.019 |
| 33.  | BD | ( 1) | C10-Ru51 | 801. | RY*( 6) Ru52     | 0.23      | 1.65    | 0.018 |
| 33.  | BD | ( 1) | C10-Ru51 | 803. | RY*( 8) Ru52     | 0.21      | 1.61    | 0.017 |
| 33.  | BD | ( 1) | C10-Ru51 | 804. | RY*( 9) Ru52     | 0.24      | 2.73    | 0.023 |
| 33.  | BD | ( 1) | C10-Ru51 | 812. | RY*(17) Ru52     | 0.10      | 4.44    | 0.019 |
| 33.  | BD | ( 1) | C10-Ru51 | 817. | RY*(22) Ru52     | 0.09      | 9.71    | 0.026 |
| 33.  | BD | ( 1) | C10-Ru51 | 840. | RY*(45) Ru52     | 0.06      | 51.35   | 0.049 |
| 33.  | BD | ( 1) | C10-Ru51 | 863. | BD*( 1) C12- C14 | 0.07      | 0.99    | 0.007 |
| 33.  | BD | ( 1) | C10-Ru51 | 864. | BD*( 2) C12- C14 | 0.06      | 0.51    | 0.005 |
| 33.  | BD | ( 1) | C10-Ru51 | 881. | BD*( 1) C 8-Ru52 | 0.23      | 0.60    | 0.011 |
| 33.  | BD | ( 1) | C10-Ru51 | 882. | BD*( 1) C 6-Ru52 | 0.06      | 0.63    | 0.006 |
| 33.  | BD | ( 1) | C10-Ru51 | 926. | BD*( 1) C16-Ru52 | 0.17      | 0.54    | 0.009 |
| 34.  | BD | ( 1) | C11- C15 | 253. | RY*(11) C 6      | 0.06      | 2.46    | 0.011 |
| 34.  | BD | ( 1) | C11- C15 | 338. | RY*( 6) C12      | 0.20      | 3.39    | 0.023 |
| 34.  | BD | ( 1) | C11- C15 | 364. | RY*( 2) C14      | 0.11      | 1.19    | 0.010 |
| 34.  | BD | ( 1) | C11- C15 | 568. | RY*( 1) H29      | 0.17      | 1.87    | 0.016 |
| 34.  | BD | ( 1) | C11- C15 | 569. | RY*( 2) H29      | 0.09      | 2.53    | 0.013 |
| 34.  | BD | ( 1) | C11- C15 | 570. | RY*( 3) H29      | 0.71      | 2.03    | 0.034 |
| 34.  | BD | ( 1) | C11- C15 | 796. | RY*( 1) Ru52     | 0.80      | 0.46    | 0.017 |
| 34.  | BD | ( 1) | C11- C15 | 799. | RY*( 4) Ru52     | 0.21      | 2.33    | 0.020 |
| 34.  | BD | ( 1) | C11- C15 | 804. | RY*( 9) Ru52     | 0.06      | 2.81    | 0.011 |
| 34.  | BD | ( 1) | C11- C15 | 813. | RY*(18) Ru52     | 0.13      | 6.07    | 0.025 |
| 35.  | BD | ( 2) | C11- C15 | 796. | RY*( 1) Ru52     | 0.79      | 0.06    | 0.007 |
| 35.  | BD | ( 2) | C11- C15 | 797. | RY*( 2) Ru52     | 0.08      | 0.67    | 0.007 |
| 36.  | BD | ( 1) | C11-Ru51 | 394. | RY*( 2) C16      | 0.05      | 0.97    | 0.007 |
| 36.  | BD | ( 1) | C11-Ru51 | 802. | RY*( 7) Ru52     | 0.07      | 3.42    | 0.015 |
| 36.  | BD | ( 1) | C11-Ru51 | 926. | BD*( 1) C16-Ru52 | 0.17      | 0.36    | 0.007 |
| 45.  | BD | ( 1) | C15- C19 | 570. | RY*( 3) H29      | 0.09      | 2.04    | 0.012 |
| 45.  | BD | ( 1) | C15- C19 | 796. | RY*( 1) Ru52     | 0.08      | 0.47    | 0.006 |
| 108. | CR | ( 3) | Ru51     | 805. | RY*(10) Ru52     | 0.05      | 21.30   | 0.030 |
| 108. | CR | ( 3) | Ru51     | 882. | BD*( 1) C 6-Ru52 | 0.05      | 22.05   | 0.033 |
| 109. | CR | ( 4) | Ru51     | 570. | RY*( 3) H29      | 0.09      | 6.03    | 0.021 |
| 109. | CR | ( 4) | Ru51     | 805. | RY*(10) Ru52     | 0.15      | 3.96    | 0.022 |
| 109. | CR | ( 4) | Ru51     | 882. | BD*( 1) C 6-Ru52 | 0.12      | 4.71    | 0.023 |
| 109. | CR | ( 4) | Ru51     | 926. | BD*( 1) C16-Ru52 | 0.10      | 4.61    | 0.021 |
| 148. | LP | ( 1) | O44      | 805. | RY*(10) Ru52     | 5.94      | 0.04    | 0.013 |
| 154. | LP | ( 1) | O48      | 796. | RY*( 1) Ru52     | 0.13      | 0.53    | 0.007 |
| 154. | LP | ( 1) | O48      | 805. | RY*(10) Ru52     | 0.49      | 0.03    | 0.004 |
| 155. | LP | ( 1) | N49      | 338. | RY*( 6) C12      | 0.08      | 3.15    | 0.015 |
| 155. | LP | ( 1) | N49      | 570. | RY*( 3) H29      | 0.16      | 1.79    | 0.016 |
| 155. | LP | ( 1) | N49      | 796. | RY*( 1) Ru52     | 2.69      | 0.22    | 0.024 |
| 155. | LP | ( 1) | N49      | 797. | RY*( 2) Ru52     | 0.56      | 0.83    | 0.021 |
| 155. | LP | ( 1) | N49      | 798. | RY*( 3) Ru52     | 0.07      | 1.07    | 0.008 |
| 155. | LP | ( 1) | N49      | 803. | RY*( 8) Ru52     | 0.06      | 1.45    | 0.009 |
| 155. | LP | ( 1) | N49      | 882. | BD*( 1) C 6-Ru52 | 0.09      | 0.47    | 0.006 |
| 157. | LP | ( 1) | Ru51     | 273. | RY*( 1) C 8      | 0.13      | 1.56    | 0.014 |
| 157. | LP | ( 1) | Ru51     | 428. | RY*( 6) C18      | 0.05      | 2.60    | 0.011 |
| 157. | LP | ( 1) | Ru51     | 570. | RY*( 3) H29      | 0.08      | 1.62    | 0.011 |
| 157. | LP | ( 1) | Ru51     | 676. | RY*( 4) O46      | 0.08      | 0.69    | 0.007 |
| 157. | LP | ( 1) | Ru51     | 691. | RY*( 4) O47      | 0.06      | 0.65    | 0.006 |
| 157. | LP | ( 1) | Ru51     | 733. | RY*( 1) N50      | 0.15      | 1.76    | 0.015 |
| 157. | LP | ( 1) | Ru51     | 796. | RY*( 1) Ru52     | 25.62     | 0.05    | 0.035 |
| 157. | LP | ( 1) | Ru51     | 797. | RY*( 2) Ru52     | 3.10      | 0.66    | 0.043 |
| 157. | LP | ( 1) | Ru51     | 798. | RY*( 3) Ru52     | 0.29      | 0.90    | 0.015 |
| 157. | LP | ( 1) | Ru51     | 799. | RY*( 4) Ru52     | 0.23      | 1.92    | 0.020 |
| 157. | LP | ( 1) | Ru51     | 800. | RY*( 5) Ru52     | 0.14      | 3.21    | 0.020 |
| 157. | LP | ( 1) | Ru51     | 801. | RY*( 6) Ru52     | 0.75      | 1.32    | 0.030 |
| 157. | LP | ( 1) | Ru51     | 804. | RY*( 9) Ru52     | 0.21      | 2.40    | 0.021 |
| 157. | LP | ( 1) | Ru51     | 807. | RY*(12) Ru52     | 0.05      | 7.25    | 0.018 |
| 157. | LP | ( 1) | Ru51     | 810. | RY*(15) Ru52     | 0.34      | 6.28    | 0.044 |
| 157. | LP | ( 1) | Ru51     | 811. | RY*(16) Ru52     | 0.22      | 6.21    | 0.035 |
| 157. | LP | ( 1) | Ru51     | 812. | RY*(17) Ru52     | 0.15      | 4.10    | 0.023 |
| 157. | LP | ( 1) | Ru51     | 813. | RY*(18) Ru52     | 0.07      | 5.66    | 0.019 |
| 157. | LP | ( 1) | Ru51     | 814. | RY*(19) Ru52     | 0.34      | 5.39    | 0.041 |
| 157. | LP | ( 1) | Ru51     | 817. | RY*(22) Ru52     | 0.06      | 9.37    | 0.022 |
| 157. | LP | ( 1) | Ru51     | 818. | RY*(23) Ru52     | 0.28      | 6.74    | 0.041 |
| 157. | LP | ( 1) | Ru51     | 819. | RY*(24) Ru52     | 0.2829463 | 5.4     | 2.738 |
| 157. | LP | ( 1) | Ru51     | 820. | RY*(25) Ru52     | 0.57      | 765.26  | 0.631 |
| 157. | LP | ( 1) | Ru51     | 821. | RY*(26) Ru52     | 0.5312899 | 5.3     | 2.478 |
| 157. | LP | ( 1) | Ru51     | 833. | RY*(38) Ru52     | 0.61      | 3361.62 | 1.364 |
| 157. | LP | ( 1) | Ru51     | 836. | RY*(41) Ru52     | 0.36      | 776.90  | 0.499 |
| 157. | LP | ( 1) | Ru51     | 837. | RY*(42) Ru52     | 0.23      | 3154.64 | 0.813 |
| 157. | LP | ( 1) | Ru51     | 840. | RY*(45) Ru52     | 0.18      | 51.02   | 0.090 |
| 157. | LP | ( 1) | Ru51     | 841. | RY*(46) Ru52     | 0.12      | 186.33  | 0.143 |
| 157. | LP | ( 1) | Ru51     | 926. | BD*( 1) C16-Ru52 | 0.28      | 0.21    | 0.007 |
| 158. | LP | ( 2) | Ru51     | 243. | RY*( 1) C 6      | 0.06      | 1.69    | 0.009 |
| 158. | LP | ( 2) | Ru51     | 273. | RY*( 1) C 8      | 0.11      | 1.56    | 0.013 |
| 158. | LP | ( 2) | Ru51     | 393. | RY*( 1) C16      | 0.11      | 1.25    | 0.011 |
| 158. | LP | ( 2) | Ru51     | 676. | RY*( 4) O46      | 0.05      | 0.70    | 0.006 |
| 158. | LP | ( 2) | Ru51     | 733. | RY*( 1) N50      | 0.08      | 1.77    | 0.011 |
| 158. | LP | ( 2) | Ru51     | 796. | RY*( 1) Ru52     | 16.95     | 0.06    | 0.030 |
| 158. | LP | ( 2) | Ru51     | 797. | RY*( 2) Ru52     | 2.06      | 0.67    | 0.036 |
| 158. | LP | ( 2) | Ru51     | 798. | RY*( 3) Ru52     | 0.26      | 0.91    | 0.015 |
| 158. | LP | ( 2) | Ru51     | 799. | RY*( 4) Ru52     | 0.33      | 1.92    | 0.024 |
| 158. | LP | ( 2) | Ru51     | 800. | RY*( 5) Ru52     | 0.18      | 3.22    | 0.023 |
| 158. | LP | ( 2) | Ru51     | 801. | RY*( 6) Ru52     | 0.25      | 1.32    | 0.018 |
| 158. | LP | ( 2) | Ru51     | 802. | RY*( 7) Ru52     | 0.13      | 3.26    | 0.020 |
| 158. | LP | ( 2) | Ru51     | 803. | RY*( 8) Ru52     | 0.08      | 1.29    | 0.010 |
| 158. | LP | ( 2) | Ru51     | 804. | RY*( 9) Ru52     | 0.44      | 2.40    | 0.031 |
| 158. | LP | ( 2) | Ru51     | 806. | RY*(11) Ru52     | 0.07      | 6.64    | 0.020 |
| 158. | LP | ( 2) | Ru51     | 810. | RY*(15) Ru52     | 0.13      | 6.28    | 0.028 |
| 158. | LP | ( 2) | Ru51     | 811. | RY*(16) Ru52     | 0.11      | 6.22    | 0.025 |
| 158. | LP | ( 2) | Ru51     | 814. | RY*(19) Ru52     | 0.22      | 5.39    | 0.033 |
| 158. | LP | ( 2) | Ru51     | 816. | RY*(21) Ru52     | 0.06      | 13.56   | 0.028 |
| 158. | LP | ( 2) | Ru51     | 817. | RY*(22) Ru52     | 0.27      | 9.38    | 0.049 |
| 158. | LP | ( 2) | Ru51     | 819. | RY*(24) Ru52     | 0.27      | 9.38    | 0.049 |
| 158. | LP | ( 2) | Ru51     | 820. | RY*(25) Ru52     | 0.26      | 765.27  | 1.918 |
| 158. | LP | ( 2) | Ru51     | 821. | RY*(26) Ru52     | 0.26      | 765.27  | 0.431 |
| 158. | LP | ( 2) | Ru51     | 821. | RY*(26) Ru52     | 0.2612899 | 5.3     | 1.753 |
| 158. | LP | ( 2) | Ru51     | 833. | RY*(38) Ru52     | 0.29      | 3361.62 | 0.957 |
| 158. | LP | ( 2) | Ru51     | 836. | RY*(41) Ru52     | 0.17      | 776.90  | 0.348 |
| 158. | LP | ( 2) | Ru51     | 837. | RY*(42) Ru52     | 0.11      | 3154.64 | 0.568 |
| 158. | LP | ( 2) | Ru51     | 840. | RY*(45) Ru52     | 0.39      | 51.03   | 0.136 |
| 158. | LP | ( 2) | Ru51     | 841. | RY*(46) Ru52     | 0.26      | 186.34  | 0.211 |
| 158. | LP | ( 2) | Ru51     | 882. | BD*( 1) C 6-Ru52 | 0.29      | 0.31    | 0.008 |
| 158. | LP | ( 2) | Ru51     | 926. | BD*( 1) C16-Ru52 | 0.07      | 0.21    | 0.004 |
| 159. | LP | ( 3) | Ru51     | 796. | RY*( 1) Ru52     | 1.53      | 0.07    | 0.010 |
| 159. | LP | ( 3) | Ru51     | 802. | RY*( 7) Ru52     | 0.05      | 3.27    | 0.013 |
| 159. | LP | ( 3) | Ru51     | 803. | RY*( 8) Ru52     | 0.06      | 1.30    | 0.008 |

| from unit | 1  | to unit | 3    |      |      |         |          |      |       |       |
|-----------|----|---------|------|------|------|---------|----------|------|-------|-------|
| 1.        | BD | (1)     | C 1- | C 2  | 638. | RY*(1)  | H43      | 0.13 | 2.17  | 0.015 |
| 1.        | BD | (1)     | C 1- | C 2  | 640. | RY*(3)  | H43      | 0.12 | 2.75  | 0.016 |
| 5.        | BD | (1)     | C 2- | H27  | 638. | RY*(1)  | H43      | 0.13 | 1.99  | 0.014 |
| 5.        | BD | (1)     | C 2- | H27  | 640. | RY*(3)  | H43      | 0.22 | 2.57  | 0.021 |
| 5.        | BD | (1)     | C 2- | H27  | 659. | RY*(2)  | O45      | 0.05 | 1.98  | 0.009 |
| 5.        | BD | (1)     | C 2- | H27  | 661. | RY*(4)  | O45      | 0.08 | 4.36  | 0.017 |
| 6.        | BD | (1)     | C 2- | N49  | 638. | RY*(1)  | H43      | 0.27 | 2.28  | 0.022 |
| 6.        | BD | (1)     | C 2- | N49  | 640. | RY*(3)  | H43      | 0.35 | 2.86  | 0.028 |
| 6.        | BD | (1)     | C 2- | N49  | 659. | RY*(2)  | O45      | 0.07 | 2.28  | 0.011 |
| 6.        | BD | (1)     | C 2- | N49  | 661. | RY*(4)  | O45      | 0.21 | 4.65  | 0.028 |
| 6.        | BD | (1)     | C 2- | N49  | 662. | RY*(5)  | O45      | 0.05 | 3.01  | 0.011 |
| 6.        | BD | (1)     | C 2- | N49  | 665. | RY*(8)  | O45      | 0.12 | 2.57  | 0.015 |
| 12.       | BD | (3)     | C 4- | O44  | 638. | RY*(1)  | H43      | 2.17 | 2.58  | 0.067 |
| 12.       | BD | (3)     | C 4- | O44  | 640. | RY*(3)  | H43      | 3.19 | 3.16  | 0.090 |
| 12.       | BD | (3)     | C 4- | O44  | 641. | RY*(4)  | H43      | 0.31 | 3.68  | 0.030 |
| 12.       | BD | (3)     | C 4- | O44  | 642. | RY*(5)  | H43      | 0.57 | 3.52  | 0.040 |
| 12.       | BD | (3)     | C 4- | O44  | 658. | RY*(1)  | O45      | 0.34 | 3.43  | 0.030 |
| 12.       | BD | (3)     | C 4- | O44  | 659. | RY*(2)  | O45      | 0.14 | 2.58  | 0.017 |
| 12.       | BD | (3)     | C 4- | O44  | 660. | RY*(3)  | O45      | 0.19 | 3.20  | 0.022 |
| 12.       | BD | (3)     | C 4- | O44  | 661. | RY*(4)  | O45      | 0.16 | 4.96  | 0.025 |
| 12.       | BD | (3)     | C 4- | O44  | 662. | RY*(5)  | O45      | 0.91 | 3.31  | 0.049 |
| 12.       | BD | (3)     | C 4- | O44  | 663. | RY*(6)  | O45      | 0.11 | 3.71  | 0.018 |
| 12.       | BD | (3)     | C 4- | O44  | 665. | RY*(8)  | O45      | 0.11 | 2.87  | 0.016 |
| 12.       | BD | (3)     | C 4- | O44  | 666. | RY*(9)  | O45      | 0.10 | 3.41  | 0.016 |
| 12.       | BD | (3)     | C 4- | O44  | 667. | RY*(10) | O45      | 0.25 | 5.93  | 0.034 |
| 12.       | BD | (3)     | C 4- | O44  | 668. | RY*(11) | O45      | 0.49 | 6.19  | 0.049 |
| 12.       | BD | (3)     | C 4- | O44  | 669. | RY*(12) | O45      | 0.27 | 5.38  | 0.034 |
| 13.       | BD | (1)     | C 4- | Ru51 | 638. | RY*(1)  | H43      | 0.12 | 2.04  | 0.014 |
| 13.       | BD | (1)     | C 4- | Ru51 | 640. | RY*(3)  | H43      | 0.51 | 2.62  | 0.033 |
| 13.       | BD | (1)     | C 4- | Ru51 | 641. | RY*(4)  | H43      | 0.09 | 3.14  | 0.015 |
| 13.       | BD | (1)     | C 4- | Ru51 | 642. | RY*(5)  | H43      | 0.14 | 2.97  | 0.019 |
| 13.       | BD | (1)     | C 4- | Ru51 | 658. | RY*(1)  | O45      | 0.65 | 2.89  | 0.040 |
| 13.       | BD | (1)     | C 4- | Ru51 | 659. | RY*(2)  | O45      | 0.09 | 2.03  | 0.013 |
| 13.       | BD | (1)     | C 4- | Ru51 | 660. | RY*(3)  | O45      | 1.41 | 2.65  | 0.056 |
| 13.       | BD | (1)     | C 4- | Ru51 | 661. | RY*(4)  | O45      | 0.08 | 4.41  | 0.017 |
| 13.       | BD | (1)     | C 4- | Ru51 | 663. | RY*(6)  | O45      | 0.16 | 3.16  | 0.020 |
| 13.       | BD | (1)     | C 4- | Ru51 | 664. | RY*(7)  | O45      | 0.09 | 2.75  | 0.014 |
| 13.       | BD | (1)     | C 4- | Ru51 | 666. | RY*(9)  | O45      | 0.16 | 2.87  | 0.019 |
| 13.       | BD | (1)     | C 4- | Ru51 | 667. | RY*(10) | O45      | 0.28 | 5.38  | 0.036 |
| 13.       | BD | (1)     | C 4- | Ru51 | 668. | RY*(11) | O45      | 0.10 | 5.65  | 0.022 |
| 13.       | BD | (1)     | C 4- | Ru51 | 669. | RY*(12) | O45      | 0.07 | 4.83  | 0.017 |
| 13.       | BD | (1)     | C 4- | Ru51 | 672. | RY*(15) | O45      | 0.12 | 76.16 | 0.086 |
| 21.       | BD | (1)     | C 7- | N49  | 638. | RY*(1)  | H43      | 0.11 | 2.26  | 0.014 |
| 21.       | BD | (1)     | C 7- | N49  | 662. | RY*(5)  | O45      | 0.07 | 2.99  | 0.013 |
| 27.       | BD | (1)     | C 9- | C11  | 638. | RY*(1)  | H43      | 0.16 | 2.11  | 0.016 |
| 27.       | BD | (1)     | C 9- | C11  | 640. | RY*(3)  | H43      | 0.24 | 2.69  | 0.023 |
| 27.       | BD | (1)     | C 9- | C11  | 658. | RY*(1)  | O45      | 0.05 | 2.96  | 0.011 |
| 27.       | BD | (1)     | C 9- | C11  | 668. | RY*(11) | O45      | 0.11 | 5.72  | 0.022 |
| 31.       | BD | (2)     | C10- | O48  | 640. | RY*(3)  | H43      | 0.14 | 2.48  | 0.017 |
| 32.       | BD | (3)     | C10- | O48  | 638. | RY*(1)  | H43      | 2.44 | 2.57  | 0.071 |
| 32.       | BD | (3)     | C10- | O48  | 640. | RY*(3)  | H43      | 3.12 | 3.16  | 0.089 |
| 32.       | BD | (3)     | C10- | O48  | 641. | RY*(4)  | H43      | 0.40 | 3.68  | 0.034 |
| 32.       | BD | (3)     | C10- | O48  | 642. | RY*(5)  | H43      | 0.56 | 3.51  | 0.040 |
| 32.       | BD | (3)     | C10- | O48  | 658. | RY*(1)  | O45      | 0.28 | 3.43  | 0.028 |
| 32.       | BD | (3)     | C10- | O48  | 660. | RY*(3)  | O45      | 0.45 | 3.19  | 0.034 |
| 32.       | BD | (3)     | C10- | O48  | 661. | RY*(4)  | O45      | 0.16 | 4.95  | 0.025 |
| 32.       | BD | (3)     | C10- | O48  | 662. | RY*(5)  | O45      | 0.92 | 3.30  | 0.049 |
| 32.       | BD | (3)     | C10- | O48  | 663. | RY*(6)  | O45      | 0.09 | 3.70  | 0.017 |
| 32.       | BD | (3)     | C10- | O48  | 664. | RY*(7)  | O45      | 0.06 | 3.29  | 0.012 |
| 32.       | BD | (3)     | C10- | O48  | 665. | RY*(8)  | O45      | 0.13 | 2.86  | 0.017 |
| 32.       | BD | (3)     | C10- | O48  | 666. | RY*(9)  | O45      | 0.11 | 3.40  | 0.017 |
| 32.       | BD | (3)     | C10- | O48  | 667. | RY*(10) | O45      | 0.18 | 5.92  | 0.029 |
| 32.       | BD | (3)     | C10- | O48  | 668. | RY*(11) | O45      | 0.50 | 6.19  | 0.050 |
| 32.       | BD | (3)     | C10- | O48  | 669. | RY*(12) | O45      | 0.17 | 5.37  | 0.027 |
| 32.       | BD | (3)     | C10- | O48  | 671. | RY*(14) | O45      | 0.05 | 5.71  | 0.016 |
| 33.       | BD | (1)     | C10- | Ru51 | 639. | RY*(2)  | H43      | 0.08 | 2.24  | 0.012 |
| 33.       | BD | (1)     | C10- | Ru51 | 641. | RY*(4)  | H43      | 0.10 | 3.14  | 0.016 |
| 33.       | BD | (1)     | C10- | Ru51 | 658. | RY*(1)  | O45      | 0.77 | 2.89  | 0.043 |
| 33.       | BD | (1)     | C10- | Ru51 | 659. | RY*(2)  | O45      | 0.26 | 2.04  | 0.021 |
| 33.       | BD | (1)     | C10- | Ru51 | 660. | RY*(3)  | O45      | 2.07 | 2.66  | 0.067 |
| 33.       | BD | (1)     | C10- | Ru51 | 661. | RY*(4)  | O45      | 0.26 | 4.42  | 0.031 |
| 33.       | BD | (1)     | C10- | Ru51 | 662. | RY*(5)  | O45      | 0.14 | 2.77  | 0.018 |
| 33.       | BD | (1)     | C10- | Ru51 | 663. | RY*(6)  | O45      | 0.06 | 3.16  | 0.012 |
| 33.       | BD | (1)     | C10- | Ru51 | 664. | RY*(7)  | O45      | 0.18 | 2.76  | 0.020 |
| 33.       | BD | (1)     | C10- | Ru51 | 667. | RY*(10) | O45      | 0.15 | 5.39  | 0.026 |
| 33.       | BD | (1)     | C10- | Ru51 | 669. | RY*(12) | O45      | 0.16 | 4.83  | 0.025 |
| 33.       | BD | (1)     | C10- | Ru51 | 670. | RY*(13) | O45      | 0.06 | 92.64 | 0.067 |
| 33.       | BD | (1)     | C10- | Ru51 | 672. | RY*(15) | O45      | 0.14 | 76.16 | 0.094 |
| 34.       | BD | (1)     | C11- | C15  | 638. | RY*(1)  | H43      | 0.71 | 2.12  | 0.035 |
| 34.       | BD | (1)     | C11- | C15  | 640. | RY*(3)  | H43      | 0.68 | 2.70  | 0.039 |
| 34.       | BD | (1)     | C11- | C15  | 642. | RY*(5)  | H43      | 0.10 | 3.05  | 0.016 |
| 34.       | BD | (1)     | C11- | C15  | 659. | RY*(2)  | O45      | 0.13 | 2.12  | 0.015 |
| 34.       | BD | (1)     | C11- | C15  | 660. | RY*(3)  | O45      | 0.13 | 2.74  | 0.017 |
| 34.       | BD | (1)     | C11- | C15  | 661. | RY*(4)  | O45      | 0.12 | 4.50  | 0.021 |
| 34.       | BD | (1)     | C11- | C15  | 662. | RY*(5)  | O45      | 0.39 | 2.85  | 0.030 |
| 34.       | BD | (1)     | C11- | C15  | 665. | RY*(8)  | O45      | 0.06 | 2.41  | 0.011 |
| 34.       | BD | (1)     | C11- | C15  | 669. | RY*(12) | O45      | 0.18 | 4.91  | 0.026 |
| 36.       | BD | (1)     | C11- | Ru51 | 639. | RY*(2)  | H43      | 0.06 | 2.06  | 0.010 |
| 36.       | BD | (1)     | C11- | Ru51 | 658. | RY*(1)  | O45      | 0.30 | 2.72  | 0.026 |
| 36.       | BD | (1)     | C11- | Ru51 | 659. | RY*(2)  | O45      | 0.07 | 1.87  | 0.011 |
| 36.       | BD | (1)     | C11- | Ru51 | 660. | RY*(3)  | O45      | 0.19 | 2.48  | 0.020 |
| 36.       | BD | (1)     | C11- | Ru51 | 661. | RY*(4)  | O45      | 0.63 | 4.24  | 0.048 |
| 36.       | BD | (1)     | C11- | Ru51 | 670. | RY*(13) | O45      | 0.22 | 92.46 | 0.132 |
| 36.       | BD | (1)     | C11- | Ru51 | 672. | RY*(15) | O45      | 0.29 | 75.99 | 0.137 |
| 45.       | BD | (1)     | C15- | C19  | 638. | RY*(1)  | H43      | 0.06 | 2.13  | 0.010 |
| 45.       | BD | (1)     | C15- | C19  | 640. | RY*(3)  | H43      | 0.12 | 2.71  | 0.016 |
| 46.       | BD | (1)     | C15- | H33  | 660. | RY*(3)  | O45      | 0.05 | 2.57  | 0.010 |
| 108.      | CR | (3)     | Ru51 |      | 640. | RY*(3)  | H43      | 0.06 | 24.03 | 0.033 |
| 109.      | CR | (4)     | Ru51 |      | 638. | RY*(1)  | H43      | 0.13 | 6.12  | 0.025 |
| 109.      | CR | (4)     | Ru51 |      | 640. | RY*(3)  | H43      | 0.15 | 6.70  | 0.028 |
| 109.      | CR | (4)     | Ru51 |      | 661. | RY*(4)  | O45      | 0.05 | 8.49  | 0.019 |
| 115.      | CR | (10)    | Ru51 |      | 934. | BD*(1)  | H43- O45 | 0.16 | 2.29  | 0.017 |
| 148.      | LP | (1)     | O44  |      | 640. | RY*(3)  | H43      | 0.07 | 2.77  | 0.012 |
| 155.      | LP | (1)     | N49  |      | 638. | RY*(1)  | H43      | 0.14 | 1.88  | 0.016 |
| 155.      | LP | (1)     | N49  |      | 640. | RY*(3)  | H43      | 0.15 | 2.46  | 0.019 |
| 155.      | LP | (1)     | N49  |      | 662. | RY*(5)  | O45      | 0.08 | 2.61  | 0.014 |
| 157.      | LP | (1)     | Ru51 |      | 638. | RY*(1)  | H43      | 0.06 | 1.71  | 0.009 |
| 157.      | LP | (1)     | Ru51 |      | 659. | RY*(2)  | O45      | 1.28 | 1.71  | 0.044 |
| 157.      | LP | (1)     | Ru51 |      | 668. | RY*(11) | O45      | 0.19 | 5.32  | 0.030 |
| 158.      | LP | (2)     | Ru51 |      | 658. | RY*(1)  | O45      | 0.56 | 2.57  | 0.036 |
| 158.      | LP | (2)     | Ru51 |      | 659. | RY*(2)  | O45      | 0.36 | 1.71  | 0.024 |
| 158.      | LP | (2)     | Ru51 |      | 668. | RY*(11) | O45      | 0.08 | 5.33  | 0.020 |
| 158.      | LP | (2)     | Ru51 |      | 934. | BD*(1)  | H43- O45 | 0.28 | 0.66  | 0.013 |
| 159.      | LP | (3)     | Ru51 |      | 934. | BD*(1)  | H43- O45 | 0.05 | 0.67  | 0.006 |

| from | unit | 1   | to   | unit | 4    |             |      |        |       |
|------|------|-----|------|------|------|-------------|------|--------|-------|
| 1.   | BD   | (1) | C 1- | C 2  | 846. | RY*( 3)C153 | 0.15 | 6.70   | 0.028 |
| 1.   | BD   | (1) | C 1- | C 2  | 847. | RY*( 4)C153 | 0.27 | 3.06   | 0.026 |
| 1.   | BD   | (1) | C 1- | C 2  | 848. | RY*( 5)C153 | 0.23 | 7.16   | 0.036 |
| 1.   | BD   | (1) | C 1- | C 2  | 853. | RY*(10)C153 | 0.06 | 5.22   | 0.016 |
| 5.   | BD   | (1) | C 2- | H27  | 845. | RY*( 2)C153 | 0.06 | 1.41   | 0.008 |
| 5.   | BD   | (1) | C 2- | H27  | 846. | RY*( 3)C153 | 0.24 | 6.52   | 0.035 |
| 5.   | BD   | (1) | C 2- | H27  | 847. | RY*( 4)C153 | 0.40 | 2.88   | 0.030 |
| 5.   | BD   | (1) | C 2- | H27  | 848. | RY*( 5)C153 | 0.38 | 6.98   | 0.046 |
| 6.   | BD   | (1) | C 2- | N49  | 845. | RY*( 2)C153 | 0.06 | 1.71   | 0.009 |
| 6.   | BD   | (1) | C 2- | N49  | 846. | RY*( 3)C153 | 0.41 | 6.81   | 0.047 |
| 6.   | BD   | (1) | C 2- | N49  | 847. | RY*( 4)C153 | 0.51 | 3.18   | 0.036 |
| 6.   | BD   | (1) | C 2- | N49  | 848. | RY*( 5)C153 | 0.77 | 7.27   | 0.067 |
| 6.   | BD   | (1) | C 2- | N49  | 851. | RY*( 8)C153 | 0.35 | 1.91   | 0.023 |
| 6.   | BD   | (1) | C 2- | N49  | 852. | RY*( 9)C153 | 0.14 | 2.48   | 0.017 |
| 6.   | BD   | (1) | C 2- | N49  | 853. | RY*(10)C153 | 0.28 | 5.33   | 0.035 |
| 6.   | BD   | (1) | C 2- | N49  | 854. | RY*(11)C153 | 0.07 | 5.90   | 0.018 |
| 6.   | BD   | (1) | C 2- | N49  | 856. | RY*(13)C153 | 0.15 | 6.11   | 0.027 |
| 12.  | BD   | (3) | C 4- | O44  | 844. | RY*( 1)C153 | 0.07 | 1.72   | 0.010 |
| 12.  | BD   | (3) | C 4- | O44  | 845. | RY*( 2)C153 | 0.24 | 2.01   | 0.020 |
| 12.  | BD   | (3) | C 4- | O44  | 846. | RY*( 3)C153 | 3.05 | 7.12   | 0.132 |
| 12.  | BD   | (3) | C 4- | O44  | 847. | RY*( 4)C153 | 4.14 | 3.48   | 0.107 |
| 12.  | BD   | (3) | C 4- | O44  | 848. | RY*( 5)C153 | 4.04 | 7.58   | 0.156 |
| 12.  | BD   | (3) | C 4- | O44  | 849. | RY*( 6)C153 | 0.09 | 2.36   | 0.013 |
| 12.  | BD   | (3) | C 4- | O44  | 851. | RY*( 8)C153 | 0.27 | 2.21   | 0.022 |
| 12.  | BD   | (3) | C 4- | O44  | 853. | RY*(10)C153 | 1.07 | 5.64   | 0.070 |
| 12.  | BD   | (3) | C 4- | O44  | 854. | RY*(11)C153 | 0.13 | 6.20   | 0.026 |
| 12.  | BD   | (3) | C 4- | O44  | 855. | RY*(12)C153 | 0.09 | 6.35   | 0.021 |
| 12.  | BD   | (3) | C 4- | O44  | 856. | RY*(13)C153 | 0.36 | 6.42   | 0.043 |
| 13.  | BD   | (1) | C 4- | Ru51 | 845. | RY*( 2)C153 | 0.13 | 1.46   | 0.013 |
| 13.  | BD   | (1) | C 4- | Ru51 | 846. | RY*( 3)C153 | 0.56 | 6.57   | 0.055 |
| 13.  | BD   | (1) | C 4- | Ru51 | 847. | RY*( 4)C153 | 0.90 | 2.93   | 0.047 |
| 13.  | BD   | (1) | C 4- | Ru51 | 848. | RY*( 5)C153 | 0.77 | 7.03   | 0.067 |
| 13.  | BD   | (1) | C 4- | Ru51 | 849. | RY*( 6)C153 | 0.13 | 1.81   | 0.014 |
| 13.  | BD   | (1) | C 4- | Ru51 | 853. | RY*(10)C153 | 0.12 | 5.09   | 0.022 |
| 13.  | BD   | (1) | C 4- | Ru51 | 856. | RY*(13)C153 | 0.06 | 5.87   | 0.016 |
| 13.  | BD   | (1) | C 4- | Ru51 | 858. | RY*(15)C153 | 0.05 | 170.72 | 0.084 |
| 13.  | BD   | (1) | C 4- | Ru51 | 860. | RY*(17)C153 | 0.06 | 49.51  | 0.048 |
| 14.  | BD   | (1) | C 5- | C 7  | 847. | RY*( 4)C153 | 0.09 | 3.06   | 0.015 |
| 14.  | BD   | (1) | C 5- | C 7  | 848. | RY*( 5)C153 | 0.10 | 7.15   | 0.024 |
| 20.  | BD   | (1) | C 7- | C 9  | 845. | RY*( 2)C153 | 0.07 | 1.54   | 0.009 |
| 20.  | BD   | (1) | C 7- | C 9  | 847. | RY*( 4)C153 | 0.14 | 3.00   | 0.019 |
| 20.  | BD   | (1) | C 7- | C 9  | 848. | RY*( 5)C153 | 0.14 | 7.10   | 0.028 |
| 20.  | BD   | (1) | C 7- | C 9  | 853. | RY*(10)C153 | 0.05 | 5.16   | 0.015 |
| 21.  | BD   | (1) | C 7- | N49  | 845. | RY*( 2)C153 | 0.08 | 1.69   | 0.010 |
| 21.  | BD   | (1) | C 7- | N49  | 846. | RY*( 3)C153 | 0.09 | 6.80   | 0.022 |
| 21.  | BD   | (1) | C 7- | N49  | 847. | RY*( 4)C153 | 0.36 | 3.16   | 0.030 |
| 21.  | BD   | (1) | C 7- | N49  | 848. | RY*( 5)C153 | 0.29 | 7.26   | 0.041 |
| 21.  | BD   | (1) | C 7- | N49  | 853. | RY*(10)C153 | 0.24 | 5.32   | 0.032 |
| 22.  | BD   | (2) | C 7- | N49  | 846. | RY*( 3)C153 | 0.08 | 6.34   | 0.022 |
| 22.  | BD   | (2) | C 7- | N49  | 850. | RY*( 7)C153 | 0.17 | 3.97   | 0.025 |
| 22.  | BD   | (2) | C 7- | N49  | 852. | RY*( 9)C153 | 0.08 | 2.00   | 0.012 |
| 22.  | BD   | (2) | C 7- | N49  | 853. | RY*(10)C153 | 0.18 | 4.86   | 0.029 |
| 22.  | BD   | (2) | C 7- | N49  | 858. | RY*(15)C153 | 0.08 | 170.49 | 0.115 |
| 22.  | BD   | (2) | C 7- | N49  | 860. | RY*(17)C153 | 0.11 | 49.28  | 0.072 |
| 22.  | BD   | (2) | C 7- | N49  | 861. | RY*(18)C153 | 0.12 | 16.28  | 0.043 |
| 27.  | BD   | (1) | C 9- | C11  | 845. | RY*( 2)C153 | 0.08 | 1.54   | 0.010 |
| 27.  | BD   | (1) | C 9- | C11  | 846. | RY*( 3)C153 | 0.18 | 6.64   | 0.031 |
| 27.  | BD   | (1) | C 9- | C11  | 847. | RY*( 4)C153 | 0.39 | 3.01   | 0.031 |
| 27.  | BD   | (1) | C 9- | C11  | 848. | RY*( 5)C153 | 0.41 | 7.11   | 0.049 |
| 27.  | BD   | (1) | C 9- | C11  | 851. | RY*( 8)C153 | 0.11 | 1.74   | 0.013 |
| 27.  | BD   | (1) | C 9- | C11  | 852. | RY*( 9)C153 | 0.06 | 2.31   | 0.010 |
| 27.  | BD   | (1) | C 9- | C11  | 853. | RY*(10)C153 | 0.34 | 5.17   | 0.038 |
| 27.  | BD   | (1) | C 9- | C11  | 856. | RY*(13)C153 | 0.06 | 5.95   | 0.016 |
| 30.  | BD   | (1) | C10- | O48  | 847. | RY*( 4)C153 | 0.09 | 2.79   | 0.014 |
| 30.  | BD   | (1) | C10- | O48  | 853. | RY*(10)C153 | 0.10 | 4.95   | 0.020 |
| 30.  | BD   | (1) | C10- | O48  | 861. | RY*(18)C153 | 0.05 | 16.37  | 0.026 |
| 31.  | BD   | (2) | C10- | O48  | 847. | RY*( 4)C153 | 0.08 | 2.80   | 0.013 |
| 31.  | BD   | (2) | C10- | O48  | 853. | RY*(10)C153 | 0.16 | 4.96   | 0.025 |
| 31.  | BD   | (2) | C10- | O48  | 856. | RY*(13)C153 | 0.06 | 5.74   | 0.016 |
| 32.  | BD   | (3) | C10- | O48  | 844. | RY*( 1)C153 | 0.12 | 1.71   | 0.013 |
| 32.  | BD   | (3) | C10- | O48  | 845. | RY*( 2)C153 | 0.35 | 2.00   | 0.024 |
| 32.  | BD   | (3) | C10- | O48  | 846. | RY*( 3)C153 | 4.00 | 7.11   | 0.151 |
| 32.  | BD   | (3) | C10- | O48  | 847. | RY*( 4)C153 | 4.88 | 3.47   | 0.116 |
| 32.  | BD   | (3) | C10- | O48  | 848. | RY*( 5)C153 | 4.36 | 7.57   | 0.162 |
| 32.  | BD   | (3) | C10- | O48  | 851. | RY*( 8)C153 | 0.20 | 2.20   | 0.019 |
| 32.  | BD   | (3) | C10- | O48  | 852. | RY*( 9)C153 | 0.07 | 2.77   | 0.013 |
| 32.  | BD   | (3) | C10- | O48  | 853. | RY*(10)C153 | 1.56 | 5.63   | 0.084 |
| 32.  | BD   | (3) | C10- | O48  | 854. | RY*(11)C153 | 0.10 | 6.19   | 0.022 |
| 32.  | BD   | (3) | C10- | O48  | 855. | RY*(12)C153 | 0.09 | 6.34   | 0.022 |
| 32.  | BD   | (3) | C10- | O48  | 856. | RY*(13)C153 | 0.48 | 6.41   | 0.049 |
| 33.  | BD   | (1) | C10- | Ru51 | 845. | RY*( 2)C153 | 0.14 | 1.47   | 0.013 |
| 33.  | BD   | (1) | C10- | Ru51 | 846. | RY*( 3)C153 | 0.45 | 6.57   | 0.049 |
| 33.  | BD   | (1) | C10- | Ru51 | 847. | RY*( 4)C153 | 0.18 | 2.94   | 0.021 |
| 33.  | BD   | (1) | C10- | Ru51 | 848. | RY*( 5)C153 | 0.29 | 7.04   | 0.041 |
| 33.  | BD   | (1) | C10- | Ru51 | 849. | RY*( 6)C153 | 0.46 | 1.82   | 0.026 |
| 33.  | BD   | (1) | C10- | Ru51 | 850. | RY*( 7)C153 | 0.68 | 4.21   | 0.049 |
| 33.  | BD   | (1) | C10- | Ru51 | 853. | RY*(10)C153 | 0.12 | 5.10   | 0.023 |
| 33.  | BD   | (1) | C10- | Ru51 | 858. | RY*(15)C153 | 0.16 | 170.73 | 0.149 |
| 33.  | BD   | (1) | C10- | Ru51 | 860. | RY*(17)C153 | 0.21 | 49.52  | 0.093 |
| 33.  | BD   | (1) | C10- | Ru51 | 861. | RY*(18)C153 | 0.17 | 16.52  | 0.049 |
| 34.  | BD   | (1) | C11- | C15  | 845. | RY*( 2)C153 | 0.15 | 1.55   | 0.014 |
| 34.  | BD   | (1) | C11- | C15  | 846. | RY*( 3)C153 | 0.76 | 6.65   | 0.064 |
| 34.  | BD   | (1) | C11- | C15  | 847. | RY*( 4)C153 | 2.54 | 3.02   | 0.078 |
| 34.  | BD   | (1) | C11- | C15  | 848. | RY*( 5)C153 | 1.02 | 7.11   | 0.077 |
| 34.  | BD   | (1) | C11- | C15  | 851. | RY*( 8)C153 | 0.14 | 1.75   | 0.014 |
| 34.  | BD   | (1) | C11- | C15  | 852. | RY*( 9)C153 | 0.06 | 2.32   | 0.010 |
| 34.  | BD   | (1) | C11- | C15  | 853. | RY*(10)C153 | 0.98 | 5.17   | 0.064 |
| 34.  | BD   | (1) | C11- | C15  | 855. | RY*(12)C153 | 0.06 | 5.89   | 0.017 |
| 34.  | BD   | (1) | C11- | C15  | 856. | RY*(13)C153 | 0.20 | 5.95   | 0.031 |
| 34.  | BD   | (1) | C11- | C15  | 861. | RY*(18)C153 | 0.07 | 16.59  | 0.031 |
| 35.  | BD   | (2) | C11- | C15  | 850. | RY*( 7)C153 | 0.06 | 3.88   | 0.015 |
| 35.  | BD   | (2) | C11- | C15  | 853. | RY*(10)C153 | 0.09 | 4.77   | 0.020 |
| 35.  | BD   | (2) | C11- | C15  | 860. | RY*(17)C153 | 0.06 | 49.19  | 0.056 |
| 35.  | BD   | (2) | C11- | C15  | 861. | RY*(18)C153 | 0.07 | 16.19  | 0.034 |
| 36.  | BD   | (1) | C11- | Ru51 | 845. | RY*( 2)C153 | 0.16 | 1.29   | 0.013 |
| 36.  | BD   | (1) | C11- | Ru51 | 849. | RY*( 6)C153 | 0.27 | 1.64   | 0.019 |
| 36.  | BD   | (1) | C11- | Ru51 | 850. | RY*( 7)C153 | 0.27 | 4.03   | 0.024 |
| 36.  | BD   | (1) | C11- | Ru51 | 852. | RY*( 9)C153 | 0.13 | 2.06   | 0.015 |
| 36.  | BD   | (1) | C11- | Ru51 | 853. | RY*(10)C153 | 0.08 | 4.92   | 0.019 |
| 36.  | BD   | (1) | C11- | Ru51 | 860. | RY*(17)C153 | 0.06 | 49.34  | 0.051 |
| 36.  | BD   | (1) | C11- | Ru51 | 861. | RY*(18)C153 | 0.06 | 16.34  | 0.029 |
| 45.  | BD   | (1) | C15- | C19  | 846. | RY*( 3)C153 | 0.11 | 6.66   | 0.025 |
| 45.  | BD   | (1) | C15- | C19  | 847. | RY*( 4)C153 | 0.22 | 3.02   | 0.023 |
| 45.  | BD   | (1) | C15- | C19  | 848. | RY*( 5)C153 | 0.14 | 7.12   | 0.028 |
| 45.  | BD   | (1) | C15- | C19  | 853. | RY*(10)C153 | 0.08 | 5.18   | 0.018 |

|                       |    |      |      |      |      |         |          |      |        |       |
|-----------------------|----|------|------|------|------|---------|----------|------|--------|-------|
| 46.                   | BD | ( 1) | C15- | H33  | 846. | RY*( 3) | C153     | 0.09 | 6.49   | 0.022 |
| 46.                   | BD | ( 1) | C15- | H33  | 847. | RY*( 4) | C153     | 0.20 | 2.85   | 0.022 |
| 46.                   | BD | ( 1) | C15- | H33  | 848. | RY*( 5) | C153     | 0.13 | 6.95   | 0.027 |
| 108.                  | CR | ( 3) | Ru51 |      | 846. | RY*( 3) | C153     | 0.14 | 27.99  | 0.056 |
| 108.                  | CR | ( 3) | Ru51 |      | 847. | RY*( 4) | C153     | 0.15 | 24.35  | 0.055 |
| 108.                  | CR | ( 3) | Ru51 |      | 848. | RY*( 5) | C153     | 0.21 | 28.45  | 0.068 |
| 108.                  | CR | ( 3) | Ru51 |      | 853. | RY*(10) | C153     | 0.06 | 26.51  | 0.037 |
| 109.                  | CR | ( 4) | Ru51 |      | 846. | RY*( 3) | C153     | 0.26 | 10.65  | 0.047 |
| 109.                  | CR | ( 4) | Ru51 |      | 847. | RY*( 4) | C153     | 0.18 | 7.01   | 0.032 |
| 109.                  | CR | ( 4) | Ru51 |      | 848. | RY*( 5) | C153     | 0.35 | 11.11  | 0.056 |
| 109.                  | CR | ( 4) | Ru51 |      | 853. | RY*(10) | C153     | 0.14 | 9.17   | 0.032 |
| 148.                  | LP | ( 1) | O44  |      | 846. | RY*( 3) | C153     | 0.06 | 6.72   | 0.018 |
| 148.                  | LP | ( 1) | O44  |      | 847. | RY*( 4) | C153     | 0.12 | 3.09   | 0.017 |
| 148.                  | LP | ( 1) | O44  |      | 848. | RY*( 5) | C153     | 0.08 | 7.19   | 0.022 |
| 154.                  | LP | ( 1) | O48  |      | 846. | RY*( 3) | C153     | 0.07 | 6.72   | 0.020 |
| 154.                  | LP | ( 1) | O48  |      | 847. | RY*( 4) | C153     | 0.05 | 3.08   | 0.011 |
| 154.                  | LP | ( 1) | O48  |      | 848. | RY*( 5) | C153     | 0.13 | 7.18   | 0.027 |
| 155.                  | LP | ( 1) | N49  |      | 845. | RY*( 2) | C153     | 0.06 | 1.31   | 0.009 |
| 155.                  | LP | ( 1) | N49  |      | 846. | RY*( 3) | C153     | 0.20 | 6.41   | 0.035 |
| 155.                  | LP | ( 1) | N49  |      | 847. | RY*( 4) | C153     | 0.28 | 2.78   | 0.027 |
| 155.                  | LP | ( 1) | N49  |      | 848. | RY*( 5) | C153     | 0.38 | 6.87   | 0.050 |
| 155.                  | LP | ( 1) | N49  |      | 851. | RY*( 8) | C153     | 0.09 | 1.51   | 0.011 |
| 155.                  | LP | ( 1) | N49  |      | 853. | RY*(10) | C153     | 0.13 | 4.93   | 0.025 |
| 157.                  | LP | ( 1) | Ru51 |      | 845. | RY*( 2) | C153     | 0.13 | 1.14   | 0.012 |
| 157.                  | LP | ( 1) | Ru51 |      | 847. | RY*( 4) | C153     | 0.26 | 2.61   | 0.025 |
| 157.                  | LP | ( 1) | Ru51 |      | 852. | RY*( 9) | C153     | 0.05 | 1.91   | 0.009 |
| 158.                  | LP | ( 2) | Ru51 |      | 845. | RY*( 2) | C153     | 0.55 | 1.14   | 0.024 |
| 158.                  | LP | ( 2) | Ru51 |      | 846. | RY*( 3) | C153     | 0.18 | 6.25   | 0.032 |
| 158.                  | LP | ( 2) | Ru51 |      | 848. | RY*( 5) | C153     | 0.22 | 6.71   | 0.037 |
| 158.                  | LP | ( 2) | Ru51 |      | 850. | RY*( 7) | C153     | 0.07 | 3.88   | 0.016 |
| 158.                  | LP | ( 2) | Ru51 |      | 852. | RY*( 9) | C153     | 0.15 | 1.91   | 0.016 |
| 158.                  | LP | ( 2) | Ru51 |      | 858. | RY*(15) | C153     | 0.09 | 170.40 | 0.119 |
| 158.                  | LP | ( 2) | Ru51 |      | 860. | RY*(17) | C153     | 0.12 | 49.19  | 0.073 |
| 158.                  | LP | ( 2) | Ru51 |      | 861. | RY*(18) | C153     | 0.09 | 16.19  | 0.036 |
| 159.                  | LP | ( 3) | Ru51 |      | 844. | RY*( 1) | C153     | 0.39 | 0.86   | 0.018 |
| from unit 2 to unit 1 |    |      |      |      |      |         |          |      |        |       |
| 17.                   | BD | ( 2) | C 6- | O46  | 184. | RY*( 2) | C 2      | 0.14 | 1.03   | 0.011 |
| 17.                   | BD | ( 2) | C 6- | O46  | 186. | RY*( 4) | C 2      | 0.06 | 1.82   | 0.009 |
| 17.                   | BD | ( 2) | C 6- | O46  | 720. | RY*( 3) | N49      | 0.05 | 2.51   | 0.010 |
| 18.                   | BD | ( 3) | C 6- | O46  | 169. | RY*( 2) | C 1      | 0.06 | 1.63   | 0.009 |
| 18.                   | BD | ( 3) | C 6- | O46  | 184. | RY*( 2) | C 2      | 0.14 | 1.73   | 0.014 |
| 18.                   | BD | ( 3) | C 6- | O46  | 185. | RY*( 3) | C 2      | 0.05 | 2.88   | 0.011 |
| 18.                   | BD | ( 3) | C 6- | O46  | 188. | RY*( 6) | C 2      | 0.25 | 4.74   | 0.031 |
| 18.                   | BD | ( 3) | C 6- | O46  | 190. | RY*( 8) | C 2      | 0.06 | 9.86   | 0.022 |
| 18.                   | BD | ( 3) | C 6- | O46  | 560. | RY*( 3) | H27      | 0.16 | 2.05   | 0.016 |
| 18.                   | BD | ( 3) | C 6- | O46  | 748. | RY*( 1) | Ru51     | 0.14 | 19.15  | 0.046 |
| 18.                   | BD | ( 3) | C 6- | O46  | 750. | RY*( 3) | Ru51     | 0.05 | 9.35   | 0.020 |
| 18.                   | BD | ( 3) | C 6- | O46  | 754. | RY*( 7) | Ru51     | 0.07 | 5.29   | 0.017 |
| 18.                   | BD | ( 3) | C 6- | O46  | 761. | RY*(14) | Ru51     | 0.06 | 8.62   | 0.020 |
| 18.                   | BD | ( 3) | C 6- | O46  | 766. | RY*(19) | Ru51     | 0.15 | 7.93   | 0.031 |
| 18.                   | BD | ( 3) | C 6- | O46  | 776. | RY*(29) | Ru51     | 0.06 | 78.52  | 0.059 |
| 19.                   | BD | ( 1) | C 6- | Ru52 | 184. | RY*( 2) | C 2      | 0.29 | 1.18   | 0.017 |
| 19.                   | BD | ( 1) | C 6- | Ru52 | 186. | RY*( 4) | C 2      | 0.05 | 1.97   | 0.009 |
| 19.                   | BD | ( 1) | C 6- | Ru52 | 188. | RY*( 6) | C 2      | 0.12 | 4.19   | 0.020 |
| 19.                   | BD | ( 1) | C 6- | Ru52 | 190. | RY*( 8) | C 2      | 0.05 | 9.31   | 0.020 |
| 19.                   | BD | ( 1) | C 6- | Ru52 | 318. | RY*( 1) | C11      | 0.10 | 1.77   | 0.012 |
| 19.                   | BD | ( 1) | C 6- | Ru52 | 558. | RY*( 1) | H27      | 0.31 | 1.90   | 0.022 |
| 19.                   | BD | ( 1) | C 6- | Ru52 | 559. | RY*( 2) | H27      | 0.07 | 2.52   | 0.012 |
| 19.                   | BD | ( 1) | C 6- | Ru52 | 560. | RY*( 3) | H27      | 0.33 | 1.49   | 0.020 |
| 19.                   | BD | ( 1) | C 6- | Ru52 | 751. | RY*( 4) | Ru51     | 0.20 | 1.79   | 0.017 |
| 19.                   | BD | ( 1) | C 6- | Ru52 | 755. | RY*( 8) | Ru51     | 0.10 | 6.67   | 0.023 |
| 19.                   | BD | ( 1) | C 6- | Ru52 | 756. | RY*( 9) | Ru51     | 0.23 | 3.14   | 0.024 |
| 19.                   | BD | ( 1) | C 6- | Ru52 | 757. | RY*(10) | Ru51     | 0.10 | 21.78  | 0.042 |
| 19.                   | BD | ( 1) | C 6- | Ru52 | 758. | RY*(11) | Ru51     | 0.07 | 7.37   | 0.021 |
| 19.                   | BD | ( 1) | C 6- | Ru52 | 792. | RY*(45) | Ru51     | 0.07 | 51.49  | 0.054 |
| 19.                   | BD | ( 1) | C 6- | Ru52 | 902. | BD*( 1) | C11-Ru51 | 0.14 | 0.56   | 0.008 |
| 19.                   | BD | ( 1) | C 6- | Ru52 | 912. | BD*( 1) | C 4-Ru51 | 0.16 | 0.61   | 0.010 |
| 23.                   | BD | ( 1) | C 8- | O47  | 748. | RY*( 1) | Ru51     | 0.08 | 18.45  | 0.033 |
| 23.                   | BD | ( 1) | C 8- | O47  | 755. | RY*( 8) | Ru51     | 0.15 | 6.53   | 0.028 |
| 23.                   | BD | ( 1) | C 8- | O47  | 756. | RY*( 9) | Ru51     | 0.12 | 3.00   | 0.017 |
| 23.                   | BD | ( 1) | C 8- | O47  | 757. | RY*(10) | Ru51     | 0.12 | 21.63  | 0.046 |
| 23.                   | BD | ( 1) | C 8- | O47  | 759. | RY*(12) | Ru51     | 0.06 | 15.13  | 0.026 |
| 23.                   | BD | ( 1) | C 8- | O47  | 764. | RY*(17) | Ru51     | 0.08 | 10.92  | 0.026 |
| 23.                   | BD | ( 1) | C 8- | O47  | 767. | RY*(20) | Ru51     | 0.07 | 17.59  | 0.031 |
| 23.                   | BD | ( 1) | C 8- | O47  | 769. | RY*(22) | Ru51     | 0.05 | 9.30   | 0.019 |
| 23.                   | BD | ( 1) | C 8- | O47  | 770. | RY*(23) | Ru51     | 0.07 | 16.54  | 0.031 |
| 23.                   | BD | ( 1) | C 8- | O47  | 776. | RY*(29) | Ru51     | 0.11 | 77.82  | 0.081 |
| 23.                   | BD | ( 1) | C 8- | O47  | 777. | RY*(30) | Ru51     | 0.07 | 26.10  | 0.039 |
| 23.                   | BD | ( 1) | C 8- | O47  | 780. | RY*(33) | Ru51     | 0.09 | 324.72 | 0.149 |
| 23.                   | BD | ( 1) | C 8- | O47  | 785. | RY*(38) | Ru51     | 0.07 | 596.55 | 0.181 |
| 23.                   | BD | ( 1) | C 8- | O47  | 792. | RY*(45) | Ru51     | 0.06 | 51.34  | 0.049 |
| 25.                   | BD | ( 3) | C 8- | O47  | 169. | RY*( 2) | C 1      | 0.05 | 1.64   | 0.008 |
| 25.                   | BD | ( 3) | C 8- | O47  | 188. | RY*( 6) | C 2      | 0.06 | 4.75   | 0.015 |
| 25.                   | BD | ( 3) | C 8- | O47  | 560. | RY*( 3) | H27      | 0.41 | 2.06   | 0.026 |
| 25.                   | BD | ( 3) | C 8- | O47  | 750. | RY*( 3) | Ru51     | 0.06 | 9.36   | 0.021 |
| 25.                   | BD | ( 3) | C 8- | O47  | 752. | RY*( 5) | Ru51     | 0.08 | 5.26   | 0.018 |
| 25.                   | BD | ( 3) | C 8- | O47  | 753. | RY*( 6) | Ru51     | 0.10 | 4.21   | 0.018 |
| 25.                   | BD | ( 3) | C 8- | O47  | 755. | RY*( 8) | Ru51     | 0.20 | 7.24   | 0.034 |
| 25.                   | BD | ( 3) | C 8- | O47  | 757. | RY*(10) | Ru51     | 0.25 | 22.34  | 0.067 |
| 25.                   | BD | ( 3) | C 8- | O47  | 760. | RY*(13) | Ru51     | 0.10 | 5.88   | 0.021 |
| 25.                   | BD | ( 3) | C 8- | O47  | 763. | RY*(16) | Ru51     | 0.09 | 13.90  | 0.032 |
| 25.                   | BD | ( 3) | C 8- | O47  | 764. | RY*(17) | Ru51     | 0.09 | 11.63  | 0.029 |
| 25.                   | BD | ( 3) | C 8- | O47  | 765. | RY*(18) | Ru51     | 0.10 | 7.80   | 0.025 |
| 25.                   | BD | ( 3) | C 8- | O47  | 766. | RY*(19) | Ru51     | 0.10 | 7.94   | 0.025 |
| 25.                   | BD | ( 3) | C 8- | O47  | 767. | RY*(20) | Ru51     | 0.15 | 18.30  | 0.047 |
| 25.                   | BD | ( 3) | C 8- | O47  | 776. | RY*(29) | Ru51     | 0.06 | 78.53  | 0.061 |
| 25.                   | BD | ( 3) | C 8- | O47  | 777. | RY*(30) | Ru51     | 0.08 | 26.81  | 0.041 |
| 25.                   | BD | ( 3) | C 8- | O47  | 780. | RY*(33) | Ru51     | 0.08 | 325.43 | 0.145 |
| 25.                   | BD | ( 3) | C 8- | O47  | 785. | RY*(38) | Ru51     | 0.06 | 597.26 | 0.171 |
| 26.                   | BD | ( 1) | C 8- | Ru52 | 184. | RY*( 2) | C 2      | 0.07 | 1.18   | 0.008 |
| 26.                   | BD | ( 1) | C 8- | Ru52 | 188. | RY*( 6) | C 2      | 0.06 | 4.19   | 0.015 |
| 26.                   | BD | ( 1) | C 8- | Ru52 | 558. | RY*( 1) | H27      | 0.32 | 1.91   | 0.022 |
| 26.                   | BD | ( 1) | C 8- | Ru52 | 560. | RY*( 3) | H27      | 0.63 | 1.50   | 0.028 |
| 26.                   | BD | ( 1) | C 8- | Ru52 | 720. | RY*( 3) | N49      | 0.05 | 2.65   | 0.011 |
| 26.                   | BD | ( 1) | C 8- | Ru52 | 751. | RY*( 4) | Ru51     | 0.08 | 1.79   | 0.011 |
| 26.                   | BD | ( 1) | C 8- | Ru52 | 755. | RY*( 8) | Ru51     | 0.17 | 6.68   | 0.031 |
| 26.                   | BD | ( 1) | C 8- | Ru52 | 757. | RY*(10) | Ru51     | 0.12 | 21.78  | 0.046 |
| 26.                   | BD | ( 1) | C 8- | Ru52 | 758. | RY*(11) | Ru51     | 0.08 | 7.37   | 0.022 |
| 26.                   | BD | ( 1) | C 8- | Ru52 | 760. | RY*(13) | Ru51     | 0.09 | 5.32   | 0.020 |
| 26.                   | BD | ( 1) | C 8- | Ru52 | 764. | RY*(17) | Ru51     | 0.06 | 11.07  | 0.022 |
| 26.                   | BD | ( 1) | C 8- | Ru52 | 765. | RY*(18) | Ru51     | 0.16 | 7.24   | 0.031 |
| 26.                   | BD | ( 1) | C 8- | Ru52 | 766. | RY*(19) | Ru51     | 0.11 | 7.38   | 0.026 |
| 26.                   | BD | ( 1) | C 8- | Ru52 | 767. | RY*(20) | Ru51     | 0.08 | 17.74  | 0.034 |
| 26.                   | BD | ( 1) | C 8- | Ru52 | 774. | RY*(27) | Ru51     | 0.05 | 49.75  | 0.046 |
| 38.                   | BD | ( 2) | C12- | C14  | 915. | BD*( 2) | C10- O48 | 0.10 | 0.25   | 0.005 |

|      |    |     |      |      |      |         |      |           |         |       |
|------|----|-----|------|------|------|---------|------|-----------|---------|-------|
| 39.  | BD | (1) | C12- | H29  | 213. | RY*(1)  | C 4  | 0.06      | 2.76    | 0.012 |
| 39.  | BD | (1) | C12- | H29  | 219. | RY*(7)  | C 4  | 0.08      | 7.12    | 0.022 |
| 39.  | BD | (1) | C12- | H29  | 303. | RY*(1)  | C10  | 0.09      | 2.58    | 0.014 |
| 39.  | BD | (1) | C12- | H29  | 748. | RY*(1)  | Ru51 | 0.20      | 18.56   | 0.054 |
| 39.  | BD | (1) | C12- | H29  | 750. | RY*(3)  | Ru51 | 0.20      | 8.76    | 0.037 |
| 39.  | BD | (1) | C12- | H29  | 752. | RY*(5)  | Ru51 | 0.11      | 4.66    | 0.020 |
| 39.  | BD | (1) | C12- | H29  | 753. | RY*(6)  | Ru51 | 0.06      | 3.61    | 0.013 |
| 39.  | BD | (1) | C12- | H29  | 755. | RY*(8)  | Ru51 | 0.20      | 6.64    | 0.033 |
| 39.  | BD | (1) | C12- | H29  | 757. | RY*(10) | Ru51 | 0.23      | 21.74   | 0.063 |
| 39.  | BD | (1) | C12- | H29  | 759. | RY*(12) | Ru51 | 0.11      | 15.24   | 0.037 |
| 39.  | BD | (1) | C12- | H29  | 760. | RY*(13) | Ru51 | 0.13      | 5.28    | 0.023 |
| 39.  | BD | (1) | C12- | H29  | 762. | RY*(15) | Ru51 | 0.12      | 14.72   | 0.038 |
| 39.  | BD | (1) | C12- | H29  | 763. | RY*(16) | Ru51 | 0.10      | 13.30   | 0.032 |
| 39.  | BD | (1) | C12- | H29  | 764. | RY*(17) | Ru51 | 0.17      | 11.03   | 0.039 |
| 39.  | BD | (1) | C12- | H29  | 767. | RY*(20) | Ru51 | 0.23      | 17.70   | 0.057 |
| 39.  | BD | (1) | C12- | H29  | 768. | RY*(21) | Ru51 | 0.06      | 17.35   | 0.028 |
| 39.  | BD | (1) | C12- | H29  | 770. | RY*(23) | Ru51 | 0.09      | 16.65   | 0.035 |
| 39.  | BD | (1) | C12- | H29  | 772. | RY*(25) | Ru51 | 0.11      | 9406.55 | 0.916 |
| 39.  | BD | (1) | C12- | H29  | 773. | RY*(26) | Ru51 | 0.0637514 | 1.10    | 1.399 |
| 39.  | BD | (1) | C12- | H29  | 776. | RY*(29) | Ru51 | 0.20      | 77.93   | 0.111 |
| 39.  | BD | (1) | C12- | H29  | 777. | RY*(30) | Ru51 | 0.18      | 26.21   | 0.061 |
| 39.  | BD | (1) | C12- | H29  | 780. | RY*(33) | Ru51 | 0.19      | 324.83  | 0.226 |
| 39.  | BD | (1) | C12- | H29  | 785. | RY*(38) | Ru51 | 0.15      | 596.66  | 0.272 |
| 39.  | BD | (1) | C12- | H29  | 789. | RY*(42) | Ru51 | 0.11      | 533.26  | 0.215 |
| 39.  | BD | (1) | C12- | H29  | 915. | BD*(2)  | C10- | 0.15      | 0.49    | 0.008 |
| 40.  | BD | (1) | C12- | N50  | 560. | RY*(3)  | H27  | 0.05      | 1.74    | 0.009 |
| 40.  | BD | (1) | C12- | N50  | 748. | RY*(1)  | Ru51 | 0.05      | 18.84   | 0.028 |
| 40.  | BD | (1) | C12- | N50  | 750. | RY*(3)  | Ru51 | 0.06      | 9.04    | 0.021 |
| 40.  | BD | (1) | C12- | N50  | 753. | RY*(6)  | Ru51 | 0.06      | 3.89    | 0.014 |
| 40.  | BD | (1) | C12- | N50  | 755. | RY*(8)  | Ru51 | 0.07      | 6.92    | 0.019 |
| 40.  | BD | (1) | C12- | N50  | 757. | RY*(10) | Ru51 | 0.09      | 22.03   | 0.040 |
| 40.  | BD | (1) | C12- | N50  | 762. | RY*(15) | Ru51 | 0.05      | 15.00   | 0.025 |
| 40.  | BD | (1) | C12- | N50  | 767. | RY*(20) | Ru51 | 0.08      | 17.99   | 0.035 |
| 40.  | BD | (1) | C12- | N50  | 776. | RY*(29) | Ru51 | 0.06      | 78.21   | 0.062 |
| 40.  | BD | (1) | C12- | N50  | 777. | RY*(30) | Ru51 | 0.05      | 26.50   | 0.033 |
| 40.  | BD | (1) | C12- | N50  | 780. | RY*(33) | Ru51 | 0.06      | 325.11  | 0.127 |
| 40.  | BD | (1) | C12- | N50  | 785. | RY*(38) | Ru51 | 0.05      | 596.95  | 0.155 |
| 47.  | BD | (1) | C16- | C18  | 560. | RY*(3)  | H27  | 0.12      | 1.58    | 0.012 |
| 48.  | BD | (1) | C16- | C22  | 188. | RY*(6)  | C 2  | 0.06      | 4.26    | 0.014 |
| 49.  | BD | (1) | C16- | Ru52 | 184. | RY*(2)  | C 2  | 0.06      | 1.01    | 0.007 |
| 49.  | BD | (1) | C16- | Ru52 | 188. | RY*(6)  | C 2  | 0.09      | 4.02    | 0.017 |
| 49.  | BD | (1) | C16- | Ru52 | 558. | RY*(1)  | H27  | 0.23      | 1.74    | 0.018 |
| 49.  | BD | (1) | C16- | Ru52 | 560. | RY*(3)  | H27  | 0.72      | 1.33    | 0.029 |
| 49.  | BD | (1) | C16- | Ru52 | 720. | RY*(3)  | N49  | 0.07      | 2.48    | 0.012 |
| 49.  | BD | (1) | C16- | Ru52 | 753. | RY*(6)  | Ru51 | 0.15      | 3.48    | 0.021 |
| 49.  | BD | (1) | C16- | Ru52 | 757. | RY*(10) | Ru51 | 0.05      | 21.61   | 0.031 |
| 49.  | BD | (1) | C16- | Ru52 | 902. | BD*(1)  | C11- | 0.08      | 0.39    | 0.005 |
| 59.  | BD | (1) | C20- | N50  | 188. | RY*(6)  | C 2  | 0.09      | 4.42    | 0.017 |
| 59.  | BD | (1) | C20- | N50  | 748. | RY*(1)  | Ru51 | 0.14      | 18.82   | 0.046 |
| 59.  | BD | (1) | C20- | N50  | 750. | RY*(3)  | Ru51 | 0.08      | 9.02    | 0.023 |
| 59.  | BD | (1) | C20- | N50  | 755. | RY*(8)  | Ru51 | 0.11      | 6.90    | 0.025 |
| 59.  | BD | (1) | C20- | N50  | 757. | RY*(10) | Ru51 | 0.08      | 22.01   | 0.037 |
| 59.  | BD | (1) | C20- | N50  | 759. | RY*(12) | Ru51 | 0.07      | 15.50   | 0.030 |
| 59.  | BD | (1) | C20- | N50  | 763. | RY*(16) | Ru51 | 0.06      | 13.56   | 0.025 |
| 59.  | BD | (1) | C20- | N50  | 764. | RY*(17) | Ru51 | 0.07      | 11.29   | 0.025 |
| 59.  | BD | (1) | C20- | N50  | 767. | RY*(20) | Ru51 | 0.08      | 17.96   | 0.034 |
| 59.  | BD | (1) | C20- | N50  | 772. | RY*(25) | Ru51 | 0.06      | 9406.81 | 0.660 |
| 59.  | BD | (1) | C20- | N50  | 776. | RY*(29) | Ru51 | 0.11      | 78.19   | 0.084 |
| 59.  | BD | (1) | C20- | N50  | 777. | RY*(30) | Ru51 | 0.08      | 26.47   | 0.041 |
| 59.  | BD | (1) | C20- | N50  | 780. | RY*(33) | Ru51 | 0.10      | 325.09  | 0.163 |
| 59.  | BD | (1) | C20- | N50  | 785. | RY*(38) | Ru51 | 0.08      | 596.93  | 0.196 |
| 59.  | BD | (1) | C20- | N50  | 789. | RY*(42) | Ru51 | 0.06      | 533.53  | 0.155 |
| 60.  | BD | (2) | C20- | N50  | 748. | RY*(1)  | Ru51 | 0.10      | 18.36   | 0.041 |
| 60.  | BD | (2) | C20- | N50  | 750. | RY*(3)  | Ru51 | 0.10      | 8.56    | 0.028 |
| 60.  | BD | (2) | C20- | N50  | 759. | RY*(12) | Ru51 | 0.06      | 15.04   | 0.028 |
| 60.  | BD | (2) | C20- | N50  | 762. | RY*(15) | Ru51 | 0.07      | 14.52   | 0.030 |
| 60.  | BD | (2) | C20- | N50  | 766. | RY*(19) | Ru51 | 0.07      | 7.15    | 0.022 |
| 60.  | BD | (2) | C20- | N50  | 767. | RY*(20) | Ru51 | 0.10      | 17.50   | 0.040 |
| 60.  | BD | (2) | C20- | N50  | 776. | RY*(29) | Ru51 | 0.09      | 77.73   | 0.079 |
| 60.  | BD | (2) | C20- | N50  | 777. | RY*(30) | Ru51 | 0.08      | 26.01   | 0.043 |
| 60.  | BD | (2) | C20- | N50  | 780. | RY*(33) | Ru51 | 0.07      | 324.63  | 0.148 |
| 60.  | BD | (2) | C20- | N50  | 785. | RY*(38) | Ru51 | 0.06      | 596.47  | 0.176 |
| 126. | CR | (3) | Ru52 |      | 913. | BD*(1)  | C10- | 0.05      | 22.01   | 0.033 |
| 127. | CR | (4) | Ru52 |      | 902. | BD*(1)  | C11- | 0.10      | 4.63    | 0.020 |
| 127. | CR | (4) | Ru52 |      | 913. | BD*(1)  | C10- | 0.13      | 4.72    | 0.024 |
| 156. | LP | (1) | N50  |      | 188. | RY*(6)  | C 2  | 0.11      | 4.03    | 0.021 |
| 156. | LP | (1) | N50  |      | 558. | RY*(1)  | H27  | 0.06      | 1.75    | 0.010 |
| 156. | LP | (1) | N50  |      | 560. | RY*(3)  | H27  | 0.11      | 1.34    | 0.012 |
| 156. | LP | (1) | N50  |      | 748. | RY*(1)  | Ru51 | 0.11      | 18.44   | 0.044 |
| 156. | LP | (1) | N50  |      | 750. | RY*(3)  | Ru51 | 0.06      | 8.64    | 0.023 |
| 156. | LP | (1) | N50  |      | 766. | RY*(19) | Ru51 | 0.07      | 7.22    | 0.022 |
| 156. | LP | (1) | N50  |      | 776. | RY*(29) | Ru51 | 0.07      | 77.81   | 0.074 |
| 156. | LP | (1) | N50  |      | 780. | RY*(33) | Ru51 | 0.06      | 324.71  | 0.134 |
| 156. | LP | (1) | N50  |      | 913. | BD*(1)  | C10- | 0.08      | 0.49    | 0.006 |
| 160. | LP | (1) | Ru52 |      | 188. | RY*(6)  | C 2  | 0.16      | 3.86    | 0.023 |
| 160. | LP | (1) | Ru52 |      | 213. | RY*(1)  | C 4  | 0.09      | 2.46    | 0.014 |
| 160. | LP | (1) | Ru52 |      | 219. | RY*(7)  | C 4  | 0.11      | 6.83    | 0.026 |
| 160. | LP | (1) | Ru52 |      | 293. | RY*(6)  | C 9  | 0.06      | 4.09    | 0.015 |
| 160. | LP | (1) | Ru52 |      | 303. | RY*(1)  | C10  | 0.06      | 2.28    | 0.011 |
| 160. | LP | (1) | Ru52 |      | 329. | RY*(12) | C11  | 0.05      | 3.35    | 0.013 |
| 160. | LP | (1) | Ru52 |      | 383. | RY*(6)  | C15  | 0.11      | 3.67    | 0.019 |
| 160. | LP | (1) | Ru52 |      | 561. | RY*(4)  | H27  | 0.15      | 2.00    | 0.016 |
| 160. | LP | (1) | Ru52 |      | 646. | RY*(4)  | O44  | 0.11      | 0.92    | 0.009 |
| 160. | LP | (1) | Ru52 |      | 706. | RY*(4)  | O48  | 0.08      | 0.92    | 0.008 |
| 160. | LP | (1) | Ru52 |      | 748. | RY*(1)  | Ru51 | 0.36      | 18.26   | 0.076 |
| 160. | LP | (1) | Ru52 |      | 750. | RY*(3)  | Ru51 | 0.24      | 8.46    | 0.043 |
| 160. | LP | (1) | Ru52 |      | 752. | RY*(5)  | Ru51 | 0.06      | 4.37    | 0.015 |
| 160. | LP | (1) | Ru52 |      | 755. | RY*(8)  | Ru51 | 0.67      | 6.34    | 0.062 |
| 160. | LP | (1) | Ru52 |      | 756. | RY*(9)  | Ru51 | 0.34      | 2.81    | 0.029 |
| 160. | LP | (1) | Ru52 |      | 757. | RY*(10) | Ru51 | 0.54      | 21.45   | 0.102 |
| 160. | LP | (1) | Ru52 |      | 759. | RY*(12) | Ru51 | 0.24      | 14.94   | 0.057 |
| 160. | LP | (1) | Ru52 |      | 760. | RY*(13) | Ru51 | 0.22      | 4.98    | 0.031 |
| 160. | LP | (1) | Ru52 |      | 761. | RY*(14) | Ru51 | 0.12      | 7.74    | 0.029 |
| 160. | LP | (1) | Ru52 |      | 762. | RY*(15) | Ru51 | 0.13      | 14.42   | 0.040 |
| 160. | LP | (1) | Ru52 |      | 763. | RY*(16) | Ru51 | 0.18      | 13.00   | 0.045 |
| 160. | LP | (1) | Ru52 |      | 764. | RY*(17) | Ru51 | 0.32      | 10.74   | 0.056 |
| 160. | LP | (1) | Ru52 |      | 765. | RY*(18) | Ru51 | 0.13      | 6.90    | 0.028 |
| 160. | LP | (1) | Ru52 |      | 767. | RY*(20) | Ru51 | 0.37      | 17.41   | 0.076 |
| 160. | LP | (1) | Ru52 |      | 768. | RY*(21) | Ru51 | 0.16      | 17.06   | 0.049 |
| 160. | LP | (1) | Ru52 |      | 769. | RY*(22) | Ru51 | 0.06      | 9.12    | 0.023 |
| 160. | LP | (1) | Ru52 |      | 770. | RY*(23) | Ru51 | 0.21      | 16.36   | 0.056 |
| 160. | LP | (1) | Ru52 |      | 772. | RY*(25) | Ru51 | 0.23      | 9406.25 | 1.399 |
| 160. | LP | (1) | Ru52 |      | 773. | RY*(26) | Ru51 | 0.1337513 | 81      | 2.128 |
| 160. | LP | (1) | Ru52 |      | 776. | RY*(29) | Ru51 | 0.45      | 77.63   | 0.176 |
| 160. | LP | (1) | Ru52 |      | 777. | RY*(30) | Ru51 | 0.34      | 25.92   | 0.089 |
| 160. | LP | (1) | Ru52 |      | 780. | RY*(33) | Ru51 | 0.40      | 324.53  | 0.341 |

|      |    |      |      |      |         |          |           |         |       |
|------|----|------|------|------|---------|----------|-----------|---------|-------|
| 160. | LP | ( 1) | Ru52 | 785. | RY*(38) | Ru51     | 0.32      | 596.37  | 0.414 |
| 160. | LP | ( 1) | Ru52 | 788. | RY*(41) | Ru51     | 0.09      | 89.14   | 0.083 |
| 160. | LP | ( 1) | Ru52 | 789. | RY*(42) | Ru51     | 0.23      | 532.97  | 0.330 |
| 160. | LP | ( 1) | Ru52 | 792. | RY*(45) | Ru51     | 0.11      | 51.16   | 0.072 |
| 160. | LP | ( 1) | Ru52 | 793. | RY*(46) | Ru51     | 0.07      | 186.24  | 0.104 |
| 161. | LP | ( 2) | Ru52 | 188. | RY*( 6) | C 2      | 0.22      | 3.86    | 0.028 |
| 161. | LP | ( 2) | Ru52 | 213. | RY*( 1) | C 4      | 0.16      | 2.47    | 0.019 |
| 161. | LP | ( 2) | Ru52 | 219. | RY*( 7) | C 4      | 0.28      | 6.83    | 0.042 |
| 161. | LP | ( 2) | Ru52 | 224. | RY*(12) | C 4      | 0.06      | 3.57    | 0.014 |
| 161. | LP | ( 2) | Ru52 | 225. | RY*(13) | C 4      | 0.09      | 2.76    | 0.015 |
| 161. | LP | ( 2) | Ru52 | 264. | RY*( 7) | C 7      | 0.12      | 4.24    | 0.021 |
| 161. | LP | ( 2) | Ru52 | 293. | RY*( 6) | C 9      | 0.13      | 4.10    | 0.022 |
| 161. | LP | ( 2) | Ru52 | 303. | RY*( 1) | C10      | 0.17      | 2.28    | 0.019 |
| 161. | LP | ( 2) | Ru52 | 305. | RY*( 3) | C10      | 0.13      | 2.82    | 0.019 |
| 161. | LP | ( 2) | Ru52 | 309. | RY*( 7) | C10      | 0.16      | 6.89    | 0.032 |
| 161. | LP | ( 2) | Ru52 | 310. | RY*( 8) | C10      | 0.06      | 4.19    | 0.016 |
| 161. | LP | ( 2) | Ru52 | 313. | RY*(11) | C10      | 0.10      | 1.99    | 0.014 |
| 161. | LP | ( 2) | Ru52 | 318. | RY*( 1) | C11      | 0.06      | 1.45    | 0.009 |
| 161. | LP | ( 2) | Ru52 | 329. | RY*(12) | C11      | 0.10      | 3.35    | 0.018 |
| 161. | LP | ( 2) | Ru52 | 383. | RY*( 6) | C15      | 0.20      | 3.68    | 0.026 |
| 161. | LP | ( 2) | Ru52 | 630. | RY*( 3) | H41      | 0.06      | 1.44    | 0.009 |
| 161. | LP | ( 2) | Ru52 | 646. | RY*( 4) | O44      | 0.22      | 0.93    | 0.014 |
| 161. | LP | ( 2) | Ru52 | 647. | RY*( 5) | O44      | 0.10      | 2.61    | 0.016 |
| 161. | LP | ( 2) | Ru52 | 706. | RY*( 4) | O48      | 0.10      | 0.93    | 0.009 |
| 161. | LP | ( 2) | Ru52 | 708. | RY*( 6) | O48      | 0.07      | 2.10    | 0.012 |
| 161. | LP | ( 2) | Ru52 | 721. | RY*( 4) | N49      | 0.08      | 4.76    | 0.019 |
| 161. | LP | ( 2) | Ru52 | 748. | RY*( 1) | Ru51     | 0.66      | 18.26   | 0.106 |
| 161. | LP | ( 2) | Ru52 | 750. | RY*( 3) | Ru51     | 0.48      | 8.46    | 0.061 |
| 161. | LP | ( 2) | Ru52 | 752. | RY*( 5) | Ru51     | 0.07      | 4.37    | 0.016 |
| 161. | LP | ( 2) | Ru52 | 753. | RY*( 6) | Ru51     | 0.11      | 3.32    | 0.019 |
| 161. | LP | ( 2) | Ru52 | 755. | RY*( 8) | Ru51     | 1.30      | 6.35    | 0.088 |
| 161. | LP | ( 2) | Ru52 | 756. | RY*( 9) | Ru51     | 1.05      | 2.82    | 0.052 |
| 161. | LP | ( 2) | Ru52 | 757. | RY*(10) | Ru51     | 1.03      | 21.45   | 0.144 |
| 161. | LP | ( 2) | Ru52 | 758. | RY*(11) | Ru51     | 0.06      | 7.04    | 0.020 |
| 161. | LP | ( 2) | Ru52 | 759. | RY*(12) | Ru51     | 0.55      | 14.95   | 0.087 |
| 161. | LP | ( 2) | Ru52 | 760. | RY*(13) | Ru51     | 0.36      | 4.99    | 0.041 |
| 161. | LP | ( 2) | Ru52 | 761. | RY*(14) | Ru51     | 0.45      | 7.74    | 0.057 |
| 161. | LP | ( 2) | Ru52 | 762. | RY*(15) | Ru51     | 0.23      | 14.43   | 0.055 |
| 161. | LP | ( 2) | Ru52 | 763. | RY*(16) | Ru51     | 0.34      | 13.01   | 0.064 |
| 161. | LP | ( 2) | Ru52 | 764. | RY*(17) | Ru51     | 0.71      | 10.74   | 0.084 |
| 161. | LP | ( 2) | Ru52 | 765. | RY*(18) | Ru51     | 0.16      | 6.91    | 0.032 |
| 161. | LP | ( 2) | Ru52 | 767. | RY*(20) | Ru51     | 0.70      | 17.41   | 0.106 |
| 161. | LP | ( 2) | Ru52 | 768. | RY*(21) | Ru51     | 0.32      | 17.06   | 0.071 |
| 161. | LP | ( 2) | Ru52 | 769. | RY*(22) | Ru51     | 0.47      | 9.12    | 0.063 |
| 161. | LP | ( 2) | Ru52 | 770. | RY*(23) | Ru51     | 0.69      | 16.36   | 0.102 |
| 161. | LP | ( 2) | Ru52 | 772. | RY*(25) | Ru51     | 0.50      | 9406.26 | 2.086 |
| 161. | LP | ( 2) | Ru52 | 773. | RY*(26) | Ru51     | 0.3037513 | 8.1     | 3.211 |
| 161. | LP | ( 2) | Ru52 | 776. | RY*(29) | Ru51     | 1.08      | 77.64   | 0.280 |
| 161. | LP | ( 2) | Ru52 | 777. | RY*(30) | Ru51     | 0.81      | 25.92   | 0.139 |
| 161. | LP | ( 2) | Ru52 | 780. | RY*(33) | Ru51     | 0.86      | 324.53  | 0.509 |
| 161. | LP | ( 2) | Ru52 | 781. | RY*(34) | Ru51     | 0.05      | 50.39   | 0.049 |
| 161. | LP | ( 2) | Ru52 | 785. | RY*(38) | Ru51     | 0.69      | 596.37  | 0.620 |
| 161. | LP | ( 2) | Ru52 | 788. | RY*(41) | Ru51     | 0.19      | 89.14   | 0.126 |
| 161. | LP | ( 2) | Ru52 | 789. | RY*(42) | Ru51     | 0.49      | 532.97  | 0.491 |
| 161. | LP | ( 2) | Ru52 | 792. | RY*(45) | Ru51     | 0.54      | 51.16   | 0.161 |
| 161. | LP | ( 2) | Ru52 | 793. | RY*(46) | Ru51     | 0.32      | 186.24  | 0.236 |
| 161. | LP | ( 2) | Ru52 | 913. | BD*( 1) | C10-Ru51 | 0.15      | 0.32    | 0.006 |
| 161. | LP | ( 2) | Ru52 | 916. | BD*( 3) | C10-O48  | 0.06      | 0.80    | 0.006 |
| 162. | LP | ( 3) | Ru52 | 749. | RY*( 2) | Ru51     | 0.07      | 1.11    | 0.009 |
| 162. | LP | ( 3) | Ru52 | 756. | RY*( 9) | Ru51     | 0.08      | 2.83    | 0.015 |

within unit 2

|     |    |      |          |      |         |      |           |         |        |
|-----|----|------|----------|------|---------|------|-----------|---------|--------|
| 16. | BD | ( 1) | C 6-O46  | 798. | RY*( 3) | Ru52 | 0.64      | 1.10    | 0.024  |
| 17. | BD | ( 2) | C 6-O46  | 796. | RY*( 1) | Ru52 | 1.55      | 0.24    | 0.017  |
| 18. | BD | ( 3) | C 6-O46  | 243. | RY*( 1) | C 6  | 2.55      | 2.58    | 0.073  |
| 18. | BD | ( 3) | C 6-O46  | 245. | RY*( 3) | C 6  | 1.22      | 3.69    | 0.060  |
| 18. | BD | ( 3) | C 6-O46  | 249. | RY*( 7) | C 6  | 1.03      | 7.35    | 0.078  |
| 18. | BD | ( 3) | C 6-O46  | 251. | RY*( 9) | C 6  | 0.77      | 4.13    | 0.050  |
| 18. | BD | ( 3) | C 6-O46  | 256. | RY*(14) | C 6  | 0.84      | 46.48   | 0.176  |
| 18. | BD | ( 3) | C 6-O46  | 257. | RY*(15) | C 6  | 1.41      | 26.56   | 0.173  |
| 18. | BD | ( 3) | C 6-O46  | 279. | RY*( 7) | C 8  | 0.58      | 5.43    | 0.050  |
| 18. | BD | ( 3) | C 6-O46  | 733. | RY*( 1) | N50  | 0.69      | 2.65    | 0.038  |
| 18. | BD | ( 3) | C 6-O46  | 796. | RY*( 1) | Ru52 | 3.22      | 0.94    | 0.049  |
| 18. | BD | ( 3) | C 6-O46  | 797. | RY*( 2) | Ru52 | 0.95      | 1.55    | 0.034  |
| 18. | BD | ( 3) | C 6-O46  | 799. | RY*( 4) | Ru52 | 1.05      | 2.81    | 0.048  |
| 18. | BD | ( 3) | C 6-O46  | 800. | RY*( 5) | Ru52 | 1.52      | 4.10    | 0.071  |
| 18. | BD | ( 3) | C 6-O46  | 802. | RY*( 7) | Ru52 | 1.37      | 4.15    | 0.067  |
| 18. | BD | ( 3) | C 6-O46  | 803. | RY*( 8) | Ru52 | 6.46      | 2.17    | 0.106  |
| 18. | BD | ( 3) | C 6-O46  | 804. | RY*( 9) | Ru52 | 0.89      | 3.28    | 0.048  |
| 18. | BD | ( 3) | C 6-O46  | 805. | RY*(10) | Ru52 | 40.23     | 0.44    | 0.119  |
| 18. | BD | ( 3) | C 6-O46  | 807. | RY*(12) | Ru52 | 3.42      | 8.14    | 0.149  |
| 18. | BD | ( 3) | C 6-O46  | 809. | RY*(14) | Ru52 | 0.76      | 6.33    | 0.062  |
| 18. | BD | ( 3) | C 6-O46  | 810. | RY*(15) | Ru52 | 0.87      | 7.17    | 0.071  |
| 18. | BD | ( 3) | C 6-O46  | 811. | RY*(16) | Ru52 | 1.07      | 7.10    | 0.078  |
| 18. | BD | ( 3) | C 6-O46  | 817. | RY*(22) | Ru52 | 1.73      | 10.26   | 0.119  |
| 18. | BD | ( 3) | C 6-O46  | 818. | RY*(23) | Ru52 | 2.15      | 7.63    | 0.114  |
| 18. | BD | ( 3) | C 6-O46  | 819. | RY*(24) | Ru52 | 4.4629464 | 4.3     | 10.247 |
| 18. | BD | ( 3) | C 6-O46  | 820. | RY*(25) | Ru52 | 9.13      | 766.15  | 2.365  |
| 18. | BD | ( 3) | C 6-O46  | 821. | RY*(26) | Ru52 | 8.9812900 | 4.1     | 9.623  |
| 18. | BD | ( 3) | C 6-O46  | 828. | RY*(33) | Ru52 | 1.11      | 156.43  | 0.372  |
| 18. | BD | ( 3) | C 6-O46  | 829. | RY*(34) | Ru52 | 0.82      | 50.75   | 0.182  |
| 18. | BD | ( 3) | C 6-O46  | 832. | RY*(37) | Ru52 | 0.52      | 187.32  | 0.279  |
| 18. | BD | ( 3) | C 6-O46  | 833. | RY*(38) | Ru52 | 10.34     | 3362.50 | 5.269  |
| 18. | BD | ( 3) | C 6-O46  | 836. | RY*(41) | Ru52 | 6.08      | 777.79  | 1.943  |
| 18. | BD | ( 3) | C 6-O46  | 837. | RY*(42) | Ru52 | 3.46      | 3155.52 | 2.952  |
| 18. | BD | ( 3) | C 6-O46  | 840. | RY*(45) | Ru52 | 0.65      | 51.91   | 0.164  |
| 19. | BD | ( 1) | C 6-Ru52 | 257. | RY*(15) | C 6  | 0.63      | 26.01   | 0.116  |
| 19. | BD | ( 1) | C 6-Ru52 | 273. | RY*( 1) | C 8  | 0.59      | 1.89    | 0.030  |
| 19. | BD | ( 1) | C 6-Ru52 | 274. | RY*( 2) | C 8  | 1.78      | 2.49    | 0.060  |
| 19. | BD | ( 1) | C 6-Ru52 | 279. | RY*( 7) | C 8  | 1.52      | 4.87    | 0.078  |
| 19. | BD | ( 1) | C 6-Ru52 | 393. | RY*( 1) | C16  | 1.46      | 1.57    | 0.043  |
| 19. | BD | ( 1) | C 6-Ru52 | 428. | RY*( 6) | C18  | 0.77      | 2.93    | 0.043  |
| 19. | BD | ( 1) | C 6-Ru52 | 675. | RY*( 3) | O46  | 1.65      | 2.39    | 0.057  |
| 19. | BD | ( 1) | C 6-Ru52 | 676. | RY*( 4) | O46  | 1.23      | 1.02    | 0.032  |
| 19. | BD | ( 1) | C 6-Ru52 | 733. | RY*( 1) | N50  | 1.00      | 2.09    | 0.042  |
| 19. | BD | ( 1) | C 6-Ru52 | 796. | RY*( 1) | Ru52 | 48.31     | 0.38    | 0.123  |
| 19. | BD | ( 1) | C 6-Ru52 | 797. | RY*( 2) | Ru52 | 17.36     | 0.99    | 0.119  |
| 19. | BD | ( 1) | C 6-Ru52 | 798. | RY*( 3) | Ru52 | 3.85      | 1.23    | 0.063  |
| 19. | BD | ( 1) | C 6-Ru52 | 801. | RY*( 6) | Ru52 | 3.41      | 1.65    | 0.068  |
| 19. | BD | ( 1) | C 6-Ru52 | 803. | RY*( 8) | Ru52 | 3.35      | 1.61    | 0.067  |
| 19. | BD | ( 1) | C 6-Ru52 | 810. | RY*(15) | Ru52 | 2.30      | 6.61    | 0.112  |
| 19. | BD | ( 1) | C 6-Ru52 | 811. | RY*(16) | Ru52 | 0.89      | 6.54    | 0.070  |
| 19. | BD | ( 1) | C 6-Ru52 | 812. | RY*(17) | Ru52 | 3.97      | 4.44    | 0.121  |
| 19. | BD | ( 1) | C 6-Ru52 | 814. | RY*(19) | Ru52 | 1.56      | 5.72    | 0.086  |
| 19. | BD | ( 1) | C 6-Ru52 | 818. | RY*(23) | Ru52 | 1.33      | 7.07    | 0.088  |
| 19. | BD | ( 1) | C 6-Ru52 | 828. | RY*(33) | Ru52 | 1.74      | 155.87  | 0.474  |

|     |    |     |          |        |      |      |          |          |              |         |       |       |
|-----|----|-----|----------|--------|------|------|----------|----------|--------------|---------|-------|-------|
| 19. | BD | (1) | C        | 6-Ru52 | 879. | BD*  | (2)      | C        | 8- O47       | 1.98    | 0.51  | 0.029 |
| 19. | BD | (1) | C        | 6-Ru52 | 880. | BD*  | (3)      | C        | 8- O47       | 1.75    | 1.11  | 0.040 |
| 19. | BD | (1) | C        | 6-Ru52 | 881. | BD*  | (1)      | C        | 8-Ru52       | 11.60   | 0.60  | 0.080 |
| 19. | BD | (1) | C        | 6-Ru52 | 882. | BD*  | (1)      | C        | 6-Ru52       | 0.86    | 0.63  | 0.022 |
| 19. | BD | (1) | C        | 6-Ru52 | 885. | BD*  | (3)      | C        | 6- O46       | 0.56    | 1.12  | 0.023 |
| 19. | BD | (1) | C        | 6-Ru52 | 926. | BD*  | (1)      | C16-Ru52 | 12.22        | 0.54    | 0.076 |       |
| 19. | BD | (1) | C        | 6-Ru52 | 927. | BD*  | (1)      | C16- C22 | 2.05         | 1.03    | 0.041 |       |
| 23. | BD | (1) | C        | 8- O47 | 796. | RY*  | (1)      | Ru52     | 1.30         | 0.24    | 0.016 |       |
| 24. | BD | (2) | C        | 8- O47 | 796. | RY*  | (1)      | Ru52     | 1.10         | 0.23    | 0.014 |       |
| 24. | BD | (2) | C        | 8- O47 | 798. | RY*  | (3)      | Ru52     | 1.42         | 1.09    | 0.035 |       |
| 25. | BD | (3) | C        | 8- O47 | 273. | RY*  | (1)      | C        | 8            | 1.74    | 2.45  | 0.058 |
| 25. | BD | (3) | C        | 8- O47 | 280. | RY*  | (8)      | C        | 8            | 1.12    | 5.10  | 0.067 |
| 25. | BD | (3) | C        | 8- O47 | 281. | RY*  | (9)      | C        | 8            | 0.50    | 3.88  | 0.040 |
| 25. | BD | (3) | C        | 8- O47 | 286. | RY*  | (14)     | C        | 8            | 0.55    | 46.70 | 0.143 |
| 25. | BD | (3) | C        | 8- O47 | 287. | RY*  | (15)     | C        | 8            | 0.82    | 27.71 | 0.135 |
| 25. | BD | (3) | C        | 8- O47 | 796. | RY*  | (1)      | Ru52     | 2.60         | 0.95    | 0.044 |       |
| 25. | BD | (3) | C        | 8- O47 | 797. | RY*  | (2)      | Ru52     | 0.71         | 1.56    | 0.030 |       |
| 25. | BD | (3) | C        | 8- O47 | 798. | RY*  | (3)      | Ru52     | 0.71         | 1.80    | 0.032 |       |
| 25. | BD | (3) | C        | 8- O47 | 800. | RY*  | (5)      | Ru52     | 2.40         | 4.11    | 0.089 |       |
| 25. | BD | (3) | C        | 8- O47 | 803. | RY*  | (8)      | Ru52     | 1.43         | 2.18    | 0.050 |       |
| 25. | BD | (3) | C        | 8- O47 | 805. | RY*  | (10)     | Ru52     | 168.84       | 0.45    | 0.246 |       |
| 25. | BD | (3) | C        | 8- O47 | 807. | RY*  | (12)     | Ru52     | 1.35         | 8.15    | 0.094 |       |
| 25. | BD | (3) | C        | 8- O47 | 808. | RY*  | (13)     | Ru52     | 0.53         | 3.50    | 0.039 |       |
| 25. | BD | (3) | C        | 8- O47 | 812. | RY*  | (17)     | Ru52     | 1.51         | 5.00    | 0.078 |       |
| 25. | BD | (3) | C        | 8- O47 | 816. | RY*  | (21)     | Ru52     | 0.90         | 14.45   | 0.102 |       |
| 25. | BD | (3) | C        | 8- O47 | 817. | RY*  | (22)     | Ru52     | 2.26         | 10.27   | 0.136 |       |
| 25. | BD | (3) | C        | 8- O47 | 818. | RY*  | (23)     | Ru52     | 6.66         | 7.64    | 0.202 |       |
| 25. | BD | (3) | C        | 8- O47 | 819. | RY*  | (24)     | Ru52     | 4.2729464.43 | 10.024  |       |       |
| 25. | BD | (3) | C        | 8- O47 | 820. | RY*  | (25)     | Ru52     | 8.87         | 766.16  | 2.330 |       |
| 25. | BD | (3) | C        | 8- O47 | 821. | RY*  | (26)     | Ru52     | 8.4312900.42 | 9.321   |       |       |
| 25. | BD | (3) | C        | 8- O47 | 828. | RY*  | (33)     | Ru52     | 0.73         | 156.44  | 0.302 |       |
| 25. | BD | (3) | C        | 8- O47 | 833. | RY*  | (38)     | Ru52     | 9.75         | 3362.51 | 5.117 |       |
| 25. | BD | (3) | C        | 8- O47 | 836. | RY*  | (41)     | Ru52     | 5.78         | 777.80  | 1.894 |       |
| 25. | BD | (3) | C        | 8- O47 | 837. | RY*  | (42)     | Ru52     | 3.35         | 3155.53 | 2.906 |       |
| 25. | BD | (3) | C        | 8- O47 | 840. | RY*  | (45)     | Ru52     | 1.01         | 51.92   | 0.204 |       |
| 25. | BD | (3) | C        | 8- O47 | 841. | RY*  | (46)     | Ru52     | 0.55         | 187.23  | 0.287 |       |
| 26. | BD | (1) | C        | 8-Ru52 | 167. | LP*  | (1)      | C16      | 0.53         | 0.45    | 0.018 |       |
| 26. | BD | (1) | C        | 8-Ru52 | 243. | RY*  | (1)      | C        | 6            | 1.34    | 2.02  | 0.047 |
| 26. | BD | (1) | C        | 8-Ru52 | 244. | RY*  | (2)      | C        | 6            | 0.90    | 1.41  | 0.032 |
| 26. | BD | (1) | C        | 8-Ru52 | 245. | RY*  | (3)      | C        | 6            | 3.22    | 3.14  | 0.091 |
| 26. | BD | (1) | C        | 8-Ru52 | 247. | RY*  | (5)      | C        | 6            | 0.57    | 2.36  | 0.034 |
| 26. | BD | (1) | C        | 8-Ru52 | 249. | RY*  | (7)      | C        | 6            | 1.43    | 6.80  | 0.090 |
| 26. | BD | (1) | C        | 8-Ru52 | 250. | RY*  | (8)      | C        | 6            | 0.83    | 4.41  | 0.055 |
| 26. | BD | (1) | C        | 8-Ru52 | 286. | RY*  | (14)     | C        | 8            | 0.51    | 46.13 | 0.140 |
| 26. | BD | (1) | C        | 8-Ru52 | 287. | RY*  | (15)     | C        | 8            | 0.55    | 27.14 | 0.111 |
| 26. | BD | (1) | C        | 8-Ru52 | 338. | RY*  | (6)      | C12      | 0.86         | 3.31    | 0.048 |       |
| 26. | BD | (1) | C        | 8-Ru52 | 394. | RY*  | (2)      | C16      | 0.78         | 1.15    | 0.027 |       |
| 26. | BD | (1) | C        | 8-Ru52 | 404. | RY*  | (12)     | C16      | 0.66         | 3.43    | 0.044 |       |
| 26. | BD | (1) | C        | 8-Ru52 | 428. | RY*  | (6)      | C18      | 1.21         | 2.94    | 0.054 |       |
| 26. | BD | (1) | C        | 8-Ru52 | 690. | RY*  | (3)      | O47      | 0.71         | 2.23    | 0.036 |       |
| 26. | BD | (1) | C        | 8-Ru52 | 691. | RY*  | (4)      | O47      | 1.69         | 0.98    | 0.037 |       |
| 26. | BD | (1) | C        | 8-Ru52 | 733. | RY*  | (1)      | N50      | 1.71         | 2.10    | 0.054 |       |
| 26. | BD | (1) | C        | 8-Ru52 | 796. | RY*  | (1)      | Ru52     | 98.73        | 0.38    | 0.177 |       |
| 26. | BD | (1) | C        | 8-Ru52 | 797. | RY*  | (2)      | Ru52     | 35.11        | 1.00    | 0.170 |       |
| 26. | BD | (1) | C        | 8-Ru52 | 798. | RY*  | (3)      | Ru52     | 9.36         | 1.24    | 0.098 |       |
| 26. | BD | (1) | C        | 8-Ru52 | 799. | RY*  | (4)      | Ru52     | 3.44         | 2.25    | 0.080 |       |
| 26. | BD | (1) | C        | 8-Ru52 | 801. | RY*  | (6)      | Ru52     | 3.69         | 1.65    | 0.071 |       |
| 26. | BD | (1) | C        | 8-Ru52 | 803. | RY*  | (8)      | Ru52     | 9.45         | 1.62    | 0.113 |       |
| 26. | BD | (1) | C        | 8-Ru52 | 804. | RY*  | (9)      | Ru52     | 1.33         | 2.73    | 0.055 |       |
| 26. | BD | (1) | C        | 8-Ru52 | 807. | RY*  | (12)     | Ru52     | 0.61         | 7.59    | 0.062 |       |
| 26. | BD | (1) | C        | 8-Ru52 | 809. | RY*  | (14)     | Ru52     | 0.58         | 5.77    | 0.053 |       |
| 26. | BD | (1) | C        | 8-Ru52 | 810. | RY*  | (15)     | Ru52     | 4.37         | 6.61    | 0.155 |       |
| 26. | BD | (1) | C        | 8-Ru52 | 811. | RY*  | (16)     | Ru52     | 5.38         | 6.55    | 0.171 |       |
| 26. | BD | (1) | C        | 8-Ru52 | 812. | RY*  | (17)     | Ru52     | 5.55         | 4.44    | 0.143 |       |
| 26. | BD | (1) | C        | 8-Ru52 | 814. | RY*  | (19)     | Ru52     | 2.41         | 5.72    | 0.107 |       |
| 26. | BD | (1) | C        | 8-Ru52 | 818. | RY*  | (23)     | Ru52     | 4.18         | 7.08    | 0.157 |       |
| 26. | BD | (1) | C        | 8-Ru52 | 820. | RY*  | (25)     | Ru52     | 0.60         | 765.60  | 0.616 |       |
| 26. | BD | (1) | C        | 8-Ru52 | 828. | RY*  | (33)     | Ru52     | 2.12         | 155.87  | 0.524 |       |
| 26. | BD | (1) | C        | 8-Ru52 | 865. | BD*  | (1)      | C12- N50 | 0.60         | 0.97    | 0.022 |       |
| 26. | BD | (1) | C        | 8-Ru52 | 881. | BD*  | (1)      | C        | 8-Ru52       | 1.12    | 0.60  | 0.025 |
| 26. | BD | (1) | C        | 8-Ru52 | 882. | BD*  | (1)      | C        | 6-Ru52       | 13.52   | 0.63  | 0.088 |
| 26. | BD | (1) | C        | 8-Ru52 | 883. | BD*  | (1)      | C        | 6- O46       | 1.87    | 0.53  | 0.029 |
| 26. | BD | (1) | C        | 8-Ru52 | 884. | BD*  | (2)      | C        | 6- O46       | 1.36    | 0.52  | 0.025 |
| 26. | BD | (1) | C        | 8-Ru52 | 885. | BD*  | (3)      | C        | 6- O46       | 2.30    | 1.12  | 0.046 |
| 26. | BD | (1) | C        | 8-Ru52 | 921. | BD*  | (1)      | C20- N50 | 0.80         | 0.94    | 0.025 |       |
| 26. | BD | (1) | C        | 8-Ru52 | 926. | BD*  | (1)      | C16-Ru52 | 13.24        | 0.54    | 0.079 |       |
| 26. | BD | (1) | C        | 8-Ru52 | 927. | BD*  | (1)      | C16- C22 | 0.60         | 1.03    | 0.022 |       |
| 26. | BD | (1) | C        | 8-Ru52 | 928. | BD*  | (1)      | C16- C18 | 0.78         | 1.04    | 0.026 |       |
| 37. | BD | (1) | C12- C14 | 469.   | RY*  | (2)  | C21      | 0.93     | 2.39         | 0.042   |       |       |
| 37. | BD | (1) | C12- C14 | 733.   | RY*  | (1)  | N50      | 1.05     | 2.23         | 0.043   |       |       |
| 37. | BD | (1) | C12- C14 | 796.   | RY*  | (1)  | Ru52     | 1.01     | 0.52         | 0.020   |       |       |
| 37. | BD | (1) | C12- C14 | 797.   | RY*  | (2)  | Ru52     | 0.60     | 1.13         | 0.023   |       |       |
| 37. | BD | (1) | C12- C14 | 805.   | RY*  | (10) | Ru52     | 165.50   | 0.02         | 0.055   |       |       |
| 37. | BD | (1) | C12- C14 | 818.   | RY*  | (23) | Ru52     | 0.54     | 7.21         | 0.056   |       |       |
| 37. | BD | (1) | C12- C14 | 865.   | BD*  | (1)  | C12- N50 | 0.62     | 1.10         | 0.023   |       |       |
| 37. | BD | (1) | C12- C14 | 867.   | BD*  | (1)  | C14- C21 | 0.71     | 1.11         | 0.025   |       |       |
| 37. | BD | (1) | C12- C14 | 882.   | BD*  | (1)  | C        | 6-Ru52   | 0.58         | 0.77    | 0.020 |       |
| 37. | BD | (1) | C12- C14 | 919.   | BD*  | (1)  | C21- H37 | 2.47     | 1.04         | 0.045   |       |       |
| 38. | BD | (2) | C12- C14 | 470.   | RY*  | (3)  | C21      | 1.04     | 0.79         | 0.028   |       |       |
| 38. | BD | (2) | C12- C14 | 734.   | RY*  | (2)  | N50      | 0.94     | 1.09         | 0.031   |       |       |
| 38. | BD | (2) | C12- C14 | 864.   | BD*  | (2)  | C12- C14 | 0.67     | 0.23         | 0.011   |       |       |
| 38. | BD | (2) | C12- C14 | 918.   | BD*  | (2)  | C21- C23 | 15.95    | 0.23         | 0.055   |       |       |
| 38. | BD | (2) | C12- C14 | 922.   | BD*  | (2)  | C20- N50 | 10.45    | 0.21         | 0.044   |       |       |
| 39. | BD | (1) | C12- H29 | 363.   | RY*  | (1)  | C14      | 0.95     | 2.08         | 0.041   |       |       |
| 39. | BD | (1) | C12- H29 | 733.   | RY*  | (1)  | N50      | 1.16     | 2.06         | 0.044   |       |       |
| 39. | BD | (1) | C12- H29 | 796.   | RY*  | (1)  | Ru52     | 1.07     | 0.35         | 0.017   |       |       |
| 39. | BD | (1) | C12- H29 | 797.   | RY*  | (2)  | Ru52     | 0.89     | 0.96         | 0.026   |       |       |
| 39. | BD | (1) | C12- H29 | 798.   | RY*  | (3)  | Ru52     | 0.59     | 1.20         | 0.024   |       |       |
| 39. | BD | (1) | C12- H29 | 799.   | RY*  | (4)  | Ru52     | 0.55     | 2.21         | 0.031   |       |       |
| 39. | BD | (1) | C12- H29 | 818.   | RY*  | (23) | Ru52     | 0.84     | 7.04         | 0.069   |       |       |
| 39. | BD | (1) | C12- H29 | 857.   | BD*  | (1)  | C14- C21 | 3.27     | 0.94         | 0.050   |       |       |
| 39. | BD | (1) | C12- H29 | 921.   | BD*  | (1)  | C20- N50 | 6.56     | 0.91         | 0.069   |       |       |
| 40. | BD | (1) | C12- N50 | 346.   | RY*  | (14) | C12      | 0.67     | 40.85        | 0.148   |       |       |
| 40. | BD | (1) | C12- N50 | 347.   | RY*  | (15) | C12      | 0.97     | 26.94        | 0.145   |       |       |
| 40. | BD | (1) | C12- N50 | 365.   | RY*  | (3)  | C14      | 0.88     | 2.64         | 0.043   |       |       |
| 40. | BD | (1) | C12- N50 | 369.   | RY*  | (7)  | C14      | 0.71     | 4.52         | 0.051   |       |       |
| 40. | BD | (1) | C12- N50 | 453.   | RY*  | (1)  | C20      | 0.55     | 2.31         | 0.032   |       |       |
| 40. | BD | (1) | C12- N50 | 455.   | RY*  | (3)  | C20      | 1.24     | 2.71         | 0.052   |       |       |
| 40. | BD | (1) | C12- N50 | 736.   | RY*  | (4)  | N50      | 0.92     | 5.27         | 0.062   |       |       |
| 40. | BD | (1) | C12- N50 | 797.   | RY*  | (2)  | Ru52     | 2.71     | 1.24         | 0.052   |       |       |
| 40. | BD | (1) | C12- N50 | 798.   | RY*  | (3)  | Ru52     | 1.72     | 1.48         | 0.045   |       |       |
| 40. | BD | (1) | C12- N50 | 799.   | RY*  | (4)  | Ru52     | 0.60     | 2.50         | 0.035   |       |       |
| 40. | BD | (1) | C12- N50 | 801.   | RY*  | (6)  | Ru52     | 2.06     | 1.90         | 0.056   |       |       |
| 40. | BD | (1) | C12- N50 | 803.   | RY*  | (8)  | Ru52     | 0.62     | 1.86         | 0.030   |       |       |
| 40. | BD | (1) | C12- N50 | 805.   | RY*  | (10) | Ru52     | 18.30    | 0.14         | 0.045   |       |       |
| 40. | BD | (1) | C12- N50 | 811.   | RY*  | (16) | Ru52     | 0.51     | 6.79         | 0.053   |       |       |



|     |        |           |      |                  |              |         |       |
|-----|--------|-----------|------|------------------|--------------|---------|-------|
| 40. | BD (1) | C12- N50  | 818. | RY*(23) Ru52     | 2.23         | 7.32    | 0.115 |
| 40. | BD (1) | C12- N50  | 819. | RY*(24) Ru52     | 0.5729464.12 |         | 3.667 |
| 40. | BD (1) | C12- N50  | 820. | RY*(25) Ru52     | 1.16         | 765.84  | 0.846 |
| 40. | BD (1) | C12- N50  | 821. | RY*(26) Ru52     | 1.1412900.11 |         | 3.433 |
| 40. | BD (1) | C12- N50  | 833. | RY*(38) Ru52     | 1.30         | 3362.20 | 1.876 |
| 40. | BD (1) | C12- N50  | 836. | RY*(41) Ru52     | 0.78         | 777.48  | 0.697 |
| 40. | BD (1) | C12- N50  | 863. | BD*(1) C12- C14  | 1.01         | 1.24    | 0.032 |
| 40. | BD (1) | C12- N50  | 868. | BD*(1) C14- H31  | 1.52         | 1.15    | 0.037 |
| 40. | BD (1) | C12- N50  | 882. | BD*(1) C 6- Ru52 | 4.03         | 0.88    | 0.058 |
| 40. | BD (1) | C12- N50  | 921. | BD*(1) C20- N50  | 0.59         | 1.19    | 0.024 |
| 40. | BD (1) | C12- N50  | 924. | BD*(1) C20- C22  | 2.70         | 1.20    | 0.051 |
| 43. | BD (1) | C14- C21  | 500. | RY*(3) C23       | 0.96         | 2.31    | 0.042 |
| 43. | BD (1) | C14- C21  | 805. | RY*(10) Ru52     | 2.16         | 0.01    | 0.005 |
| 43. | BD (1) | C14- C21  | 863. | BD*(1) C12- C14  | 0.81         | 1.12    | 0.027 |
| 43. | BD (1) | C14- C21  | 866. | BD*(1) C12- H29  | 2.51         | 1.01    | 0.045 |
| 43. | BD (1) | C14- C21  | 917. | BD*(1) C21- C23  | 0.81         | 1.12    | 0.027 |
| 43. | BD (1) | C14- C21  | 920. | BD*(1) C23- H38  | 2.49         | 1.03    | 0.045 |
| 44. | BD (1) | C14- H31  | 333. | RY*(1) C12       | 0.68         | 2.00    | 0.033 |
| 44. | BD (1) | C14- H31  | 468. | RY*(1) C21       | 0.86         | 2.24    | 0.039 |
| 44. | BD (1) | C14- H31  | 865. | BD*(1) C12- N50  | 5.42         | 0.92    | 0.063 |
| 44. | BD (1) | C14- H31  | 917. | BD*(1) C21- C23  | 3.29         | 0.95    | 0.050 |
| 47. | BD (1) | C16- C18  | 396. | RY*(4) C16       | 0.89         | 2.78    | 0.045 |
| 47. | BD (1) | C16- C18  | 435. | RY*(13) C18      | 0.61         | 41.18   | 0.143 |
| 47. | BD (1) | C16- C18  | 437. | RY*(15) C18      | 0.78         | 27.40   | 0.131 |
| 47. | BD (1) | C16- C18  | 483. | RY*(1) C22       | 0.68         | 1.95    | 0.033 |
| 47. | BD (1) | C16- C18  | 487. | RY*(5) C22       | 0.68         | 4.23    | 0.048 |
| 47. | BD (1) | C16- C18  | 515. | RY*(3) C24       | 1.25         | 2.50    | 0.050 |
| 47. | BD (1) | C16- C18  | 733. | RY*(1) N50       | 0.78         | 2.18    | 0.037 |
| 47. | BD (1) | C16- C18  | 796. | RY*(1) Ru52      | 2.98         | 0.47    | 0.033 |
| 47. | BD (1) | C16- C18  | 797. | RY*(2) Ru52      | 2.45         | 1.08    | 0.046 |
| 47. | BD (1) | C16- C18  | 802. | RY*(7) Ru52      | 0.59         | 3.68    | 0.042 |
| 47. | BD (1) | C16- C18  | 803. | RY*(8) Ru52      | 4.24         | 1.70    | 0.076 |
| 47. | BD (1) | C16- C18  | 806. | RY*(11) Ru52     | 1.23         | 7.05    | 0.083 |
| 47. | BD (1) | C16- C18  | 812. | RY*(17) Ru52     | 1.14         | 4.52    | 0.064 |
| 47. | BD (1) | C16- C18  | 817. | RY*(22) Ru52     | 1.11         | 9.79    | 0.094 |
| 47. | BD (1) | C16- C18  | 818. | RY*(23) Ru52     | 0.68         | 7.16    | 0.062 |
| 47. | BD (1) | C16- C18  | 819. | RY*(24) Ru52     | 1.2029463.96 |         | 5.328 |
| 47. | BD (1) | C16- C18  | 820. | RY*(25) Ru52     | 2.45         | 765.68  | 1.229 |
| 47. | BD (1) | C16- C18  | 821. | RY*(26) Ru52     | 2.2912899.95 |         | 4.877 |
| 47. | BD (1) | C16- C18  | 822. | RY*(27) Ru52     | 0.62         | 49.85   | 0.158 |
| 47. | BD (1) | C16- C18  | 833. | RY*(38) Ru52     | 2.64         | 3362.03 | 2.673 |
| 47. | BD (1) | C16- C18  | 836. | RY*(41) Ru52     | 1.56         | 777.32  | 0.988 |
| 47. | BD (1) | C16- C18  | 837. | RY*(42) Ru52     | 0.96         | 3155.05 | 1.564 |
| 47. | BD (1) | C16- C18  | 840. | RY*(45) Ru52     | 0.60         | 51.44   | 0.157 |
| 47. | BD (1) | C16- C18  | 924. | BD*(1) C20- C22  | 3.69         | 1.04    | 0.055 |
| 47. | BD (1) | C16- C18  | 927. | BD*(1) C16- C22  | 0.65         | 1.11    | 0.024 |
| 47. | BD (1) | C16- C18  | 930. | BD*(1) C24- H36  | 2.18         | 1.02    | 0.042 |
| 47. | BD (1) | C16- C18  | 931. | BD*(1) C18- C24  | 1.36         | 1.10    | 0.034 |
| 47. | BD (1) | C16- C18  | 933. | BD*(1) C18- H32  | 0.66         | 1.02    | 0.023 |
| 48. | BD (1) | C16- C22  | 395. | RY*(3) C16       | 0.70         | 1.58    | 0.030 |
| 48. | BD (1) | C16- C22  | 425. | RY*(3) C18       | 1.02         | 2.26    | 0.043 |
| 48. | BD (1) | C16- C22  | 429. | RY*(7) C18       | 0.59         | 8.48    | 0.063 |
| 48. | BD (1) | C16- C22  | 453. | RY*(1) C20       | 0.66         | 2.13    | 0.034 |
| 48. | BD (1) | C16- C22  | 491. | RY*(9) C22       | 0.73         | 14.20   | 0.092 |
| 48. | BD (1) | C16- C22  | 496. | RY*(14) C22      | 1.00         | 26.17   | 0.145 |
| 48. | BD (1) | C16- C22  | 497. | RY*(15) C22      | 0.83         | 42.36   | 0.169 |
| 48. | BD (1) | C16- C22  | 530. | RY*(3) C25       | 0.74         | 2.34    | 0.037 |
| 48. | BD (1) | C16- C22  | 531. | RY*(4) C25       | 0.89         | 2.15    | 0.039 |
| 48. | BD (1) | C16- C22  | 533. | RY*(6) C25       | 0.63         | 6.21    | 0.056 |
| 48. | BD (1) | C16- C22  | 796. | RY*(1) Ru52      | 10.88        | 0.46    | 0.063 |
| 48. | BD (1) | C16- C22  | 798. | RY*(3) Ru52      | 0.76         | 1.31    | 0.028 |
| 48. | BD (1) | C16- C22  | 801. | RY*(6) Ru52      | 0.51         | 1.73    | 0.027 |
| 48. | BD (1) | C16- C22  | 802. | RY*(7) Ru52      | 0.57         | 3.67    | 0.041 |
| 48. | BD (1) | C16- C22  | 818. | RY*(23) Ru52     | 1.63         | 7.15    | 0.097 |
| 48. | BD (1) | C16- C22  | 820. | RY*(25) Ru52     | 0.71         | 765.67  | 0.662 |
| 48. | BD (1) | C16- C22  | 821. | RY*(26) Ru52     | 0.6312899.93 |         | 2.556 |
| 48. | BD (1) | C16- C22  | 833. | RY*(38) Ru52     | 0.72         | 3362.02 | 1.403 |
| 48. | BD (1) | C16- C22  | 865. | BD*(1) C12- N50  | 0.50         | 1.04    | 0.020 |
| 48. | BD (1) | C16- C22  | 871. | BD*(1) C25- H39  | 2.27         | 1.00    | 0.043 |
| 48. | BD (1) | C16- C22  | 923. | BD*(1) C20- C23  | 3.63         | 1.07    | 0.056 |
| 48. | BD (1) | C16- C22  | 924. | BD*(1) C20- C22  | 1.06         | 1.02    | 0.029 |
| 48. | BD (1) | C16- C22  | 925. | BD*(1) C22- C25  | 2.24         | 1.09    | 0.044 |
| 48. | BD (1) | C16- C22  | 928. | BD*(1) C16- C18  | 0.51         | 1.11    | 0.021 |
| 48. | BD (1) | C16- C22  | 933. | BD*(1) C18- H32  | 2.85         | 1.01    | 0.048 |
| 49. | BD (1) | C16- Ru52 | 243. | RY*(1) C 6       | 1.45         | 1.85    | 0.048 |
| 49. | BD (1) | C16- Ru52 | 245. | RY*(3) C 6       | 2.91         | 2.97    | 0.086 |
| 49. | BD (1) | C16- Ru52 | 249. | RY*(7) C 6       | 1.00         | 6.63    | 0.076 |
| 49. | BD (1) | C16- Ru52 | 250. | RY*(8) C 6       | 0.75         | 4.24    | 0.052 |
| 49. | BD (1) | C16- Ru52 | 273. | RY*(1) C 8       | 0.82         | 1.72    | 0.035 |
| 49. | BD (1) | C16- Ru52 | 274. | RY*(2) C 8       | 0.86         | 2.33    | 0.041 |
| 49. | BD (1) | C16- Ru52 | 279. | RY*(7) C 8       | 0.84         | 4.70    | 0.058 |
| 49. | BD (1) | C16- Ru52 | 338. | RY*(6) C12       | 0.83         | 3.14    | 0.047 |
| 49. | BD (1) | C16- Ru52 | 404. | RY*(12) C16      | 0.69         | 3.26    | 0.044 |
| 49. | BD (1) | C16- Ru52 | 423. | RY*(1) C18       | 0.51         | 1.99    | 0.030 |
| 49. | BD (1) | C16- Ru52 | 425. | RY*(3) C18       | 1.28         | 2.02    | 0.047 |
| 49. | BD (1) | C16- Ru52 | 428. | RY*(6) C18       | 0.59         | 2.77    | 0.038 |
| 49. | BD (1) | C16- Ru52 | 691. | RY*(4) O47       | 0.79         | 0.81    | 0.023 |
| 49. | BD (1) | C16- Ru52 | 733. | RY*(1) N50       | 1.62         | 1.93    | 0.052 |
| 49. | BD (1) | C16- Ru52 | 796. | RY*(1) Ru52      | 147.77       | 0.21    | 0.165 |
| 49. | BD (1) | C16- Ru52 | 797. | RY*(2) Ru52      | 50.57        | 0.83    | 0.189 |
| 49. | BD (1) | C16- Ru52 | 798. | RY*(3) Ru52      | 11.35        | 1.07    | 0.102 |
| 49. | BD (1) | C16- Ru52 | 799. | RY*(4) Ru52      | 5.16         | 2.08    | 0.096 |
| 49. | BD (1) | C16- Ru52 | 801. | RY*(6) Ru52      | 2.61         | 1.48    | 0.058 |
| 49. | BD (1) | C16- Ru52 | 803. | RY*(8) Ru52      | 7.20         | 1.45    | 0.094 |
| 49. | BD (1) | C16- Ru52 | 804. | RY*(9) Ru52      | 0.60         | 2.56    | 0.036 |
| 49. | BD (1) | C16- Ru52 | 807. | RY*(12) Ru52     | 0.80         | 7.42    | 0.071 |
| 49. | BD (1) | C16- Ru52 | 808. | RY*(13) Ru52     | 0.53         | 2.77    | 0.035 |
| 49. | BD (1) | C16- Ru52 | 809. | RY*(14) Ru52     | 0.76         | 5.60    | 0.060 |
| 49. | BD (1) | C16- Ru52 | 810. | RY*(15) Ru52     | 2.83         | 6.44    | 0.125 |
| 49. | BD (1) | C16- Ru52 | 811. | RY*(16) Ru52     | 4.29         | 6.38    | 0.153 |
| 49. | BD (1) | C16- Ru52 | 812. | RY*(17) Ru52     | 4.10         | 4.27    | 0.122 |
| 49. | BD (1) | C16- Ru52 | 814. | RY*(19) Ru52     | 2.21         | 5.55    | 0.103 |
| 49. | BD (1) | C16- Ru52 | 818. | RY*(23) Ru52     | 3.39         | 6.91    | 0.142 |
| 49. | BD (1) | C16- Ru52 | 828. | RY*(33) Ru52     | 2.53         | 155.70  | 0.581 |
| 49. | BD (1) | C16- Ru52 | 865. | BD*(1) C12- N50  | 1.67         | 0.80    | 0.034 |
| 49. | BD (1) | C16- Ru52 | 878. | BD*(1) C 8- O47  | 1.60         | 0.35    | 0.022 |
| 49. | BD (1) | C16- Ru52 | 880. | BD*(3) C 8- O47  | 0.90         | 0.94    | 0.027 |
| 49. | BD (1) | C16- Ru52 | 881. | BD*(1) C 8- Ru52 | 13.33        | 0.43    | 0.071 |
| 49. | BD (1) | C16- Ru52 | 882. | BD*(1) C 6- Ru52 | 14.62        | 0.46    | 0.077 |
| 49. | BD (1) | C16- Ru52 | 884. | BD*(2) C 6- O46  | 1.12         | 0.35    | 0.018 |
| 49. | BD (1) | C16- Ru52 | 885. | BD*(3) C 6- O46  | 2.28         | 0.95    | 0.043 |
| 49. | BD (1) | C16- Ru52 | 923. | BD*(1) C20- C23  | 0.61         | 0.82    | 0.021 |
| 49. | BD (1) | C16- Ru52 | 924. | BD*(1) C20- C22  | 0.61         | 0.78    | 0.020 |
| 49. | BD (1) | C16- Ru52 | 925. | BD*(1) C22- C25  | 6.32         | 0.84    | 0.067 |
| 49. | BD (1) | C16- Ru52 | 926. | BD*(1) C16- Ru52 | 1.35         | 0.37    | 0.021 |
| 49. | BD (1) | C16- Ru52 | 931. | BD*(1) C18- C24  | 5.25         | 0.84    | 0.061 |

|     |    |     |          |      |     |      |           |       |       |       |
|-----|----|-----|----------|------|-----|------|-----------|-------|-------|-------|
| 49. | BD | (1) | C16-Ru52 | 933. | BD* | (1)  | C18- H32  | 0.85  | 0.77  | 0.023 |
| 53. | BD | (1) | C18- C24 | 393. | RY* | (1)  | C16       | 0.66  | 1.66  | 0.030 |
| 53. | BD | (1) | C18- C24 | 545. | RY* | (3)  | C26       | 0.99  | 2.53  | 0.045 |
| 53. | BD | (1) | C18- C24 | 872. | BD* | (1)  | C26- H40  | 2.39  | 1.02  | 0.044 |
| 53. | BD | (1) | C18- C24 | 926. | BD* | (1)  | C16-Ru52  | 4.19  | 0.63  | 0.049 |
| 53. | BD | (1) | C18- C24 | 928. | BD* | (1)  | C16- C18  | 1.43  | 1.13  | 0.036 |
| 53. | BD | (1) | C18- C24 | 929. | BD* | (1)  | C24- C26  | 0.76  | 1.09  | 0.026 |
| 54. | BD | (2) | C18- C24 | 167. | LP* | (1)  | C16       | 40.16 | 0.13  | 0.075 |
| 54. | BD | (2) | C18- C24 | 394. | RY* | (2)  | C16       | 0.74  | 0.83  | 0.024 |
| 54. | BD | (2) | C18- C24 | 424. | RY* | (2)  | C18       | 0.60  | 0.69  | 0.020 |
| 54. | BD | (2) | C18- C24 | 544. | RY* | (2)  | C26       | 0.92  | 0.71  | 0.025 |
| 54. | BD | (2) | C18- C24 | 870. | BD* | (2)  | C25- C26  | 14.36 | 0.22  | 0.051 |
| 55. | BD | (1) | C18- H32 | 393. | RY* | (1)  | C16       | 1.50  | 1.49  | 0.042 |
| 55. | BD | (1) | C18- H32 | 513. | RY* | (1)  | C24       | 1.02  | 2.02  | 0.041 |
| 55. | BD | (1) | C18- H32 | 927. | BD* | (1)  | C16- C22  | 3.76  | 0.94  | 0.053 |
| 55. | BD | (1) | C18- H32 | 929. | BD* | (1)  | C24- C26  | 3.74  | 0.92  | 0.052 |
| 57. | BD | (1) | C20- C22 | 393. | RY* | (1)  | C16       | 0.78  | 1.64  | 0.032 |
| 57. | BD | (1) | C20- C22 | 498. | RY* | (1)  | C23       | 0.83  | 2.13  | 0.038 |
| 57. | BD | (1) | C20- C22 | 528. | RY* | (1)  | C25       | 0.91  | 2.14  | 0.040 |
| 57. | BD | (1) | C20- C22 | 733. | RY* | (1)  | N50       | 0.62  | 2.16  | 0.033 |
| 57. | BD | (1) | C20- C22 | 796. | RY* | (1)  | Ru52      | 1.39  | 0.45  | 0.023 |
| 57. | BD | (1) | C20- C22 | 802. | RY* | (7)  | Ru52      | 0.51  | 3.66  | 0.039 |
| 57. | BD | (1) | C20- C22 | 865. | BD* | (1)  | C12- N50  | 4.66  | 1.03  | 0.062 |
| 57. | BD | (1) | C20- C22 | 869. | BD* | (1)  | C25- C26  | 2.09  | 1.09  | 0.043 |
| 57. | BD | (1) | C20- C22 | 917. | BD* | (1)  | C21- C23  | 2.03  | 1.06  | 0.042 |
| 57. | BD | (1) | C20- C22 | 923. | BD* | (1)  | C20- C23  | 1.00  | 1.06  | 0.029 |
| 57. | BD | (1) | C20- C22 | 925. | BD* | (1)  | C22- C25  | 0.89  | 1.08  | 0.028 |
| 57. | BD | (1) | C20- C22 | 927. | BD* | (1)  | C16- C22  | 1.08  | 1.10  | 0.031 |
| 57. | BD | (1) | C20- C22 | 928. | BD* | (1)  | C16- C18  | 2.56  | 1.11  | 0.048 |
| 58. | BD | (1) | C20- C23 | 469. | RY* | (2)  | C21       | 1.56  | 2.38  | 0.055 |
| 58. | BD | (1) | C20- C23 | 485. | RY* | (3)  | C22       | 1.05  | 2.38  | 0.045 |
| 58. | BD | (1) | C20- C23 | 796. | RY* | (1)  | Ru52      | 0.91  | 0.50  | 0.019 |
| 58. | BD | (1) | C20- C23 | 882. | BD* | (1)  | C 6- Ru52 | 0.51  | 0.75  | 0.019 |
| 58. | BD | (1) | C20- C23 | 917. | BD* | (1)  | C21- C23  | 0.92  | 1.11  | 0.029 |
| 58. | BD | (1) | C20- C23 | 919. | BD* | (1)  | C21- H37  | 2.36  | 1.02  | 0.044 |
| 58. | BD | (1) | C20- C23 | 924. | BD* | (1)  | C20- C22  | 1.09  | 1.07  | 0.031 |
| 58. | BD | (1) | C20- C23 | 927. | BD* | (1)  | C16- C22  | 2.20  | 1.15  | 0.045 |
| 59. | BD | (1) | C20- N50 | 335. | RY* | (3)  | C12       | 1.88  | 2.46  | 0.061 |
| 59. | BD | (1) | C20- N50 | 461. | RY* | (9)  | C20       | 0.57  | 9.67  | 0.067 |
| 59. | BD | (1) | C20- N50 | 466. | RY* | (14) | C20       | 0.76  | 42.68 | 0.161 |
| 59. | BD | (1) | C20- N50 | 467. | RY* | (15) | C20       | 1.03  | 24.71 | 0.143 |
| 59. | BD | (1) | C20- N50 | 503. | RY* | (6)  | C23       | 0.52  | 6.81  | 0.053 |
| 59. | BD | (1) | C20- N50 | 505. | RY* | (8)  | C23       | 0.63  | 3.96  | 0.045 |
| 59. | BD | (1) | C20- N50 | 735. | RY* | (3)  | N50       | 1.14  | 2.88  | 0.051 |
| 59. | BD | (1) | C20- N50 | 796. | RY* | (1)  | Ru52      | 7.38  | 0.61  | 0.060 |
| 59. | BD | (1) | C20- N50 | 805. | RY* | (10) | Ru52      | 20.32 | 0.11  | 0.043 |
| 59. | BD | (1) | C20- N50 | 818. | RY* | (23) | Ru52      | 2.01  | 7.30  | 0.073 |
| 59. | BD | (1) | C20- N50 | 866. | BD* | (1)  | C12- H29  | 0.98  | 1.11  | 0.043 |
| 59. | BD | (1) | C20- N50 | 882. | BD* | (1)  | C 6- Ru52 | 4.94  | 0.86  | 0.063 |
| 59. | BD | (1) | C20- N50 | 920. | BD* | (1)  | C23- H38  | 1.59  | 1.13  | 0.038 |
| 59. | BD | (1) | C20- N50 | 923. | BD* | (1)  | C20- C23  | 1.01  | 1.22  | 0.031 |
| 59. | BD | (1) | C20- N50 | 924. | BD* | (1)  | C20- C22  | 0.63  | 1.18  | 0.024 |
| 59. | BD | (1) | C20- N50 | 925. | BD* | (1)  | C22- C25  | 2.38  | 1.24  | 0.049 |
| 60. | BD | (2) | C20- N50 | 147. | LP  | (1)  | C22       | 12.86 | 0.20  | 0.057 |
| 60. | BD | (2) | C20- N50 | 334. | RY* | (2)  | C12       | 2.85  | 0.95  | 0.050 |
| 60. | BD | (2) | C20- N50 | 484. | RY* | (2)  | C22       | 0.74  | 0.83  | 0.024 |
| 60. | BD | (2) | C20- N50 | 499. | RY* | (2)  | C23       | 0.97  | 0.76  | 0.026 |
| 60. | BD | (2) | C20- N50 | 734. | RY* | (2)  | N50       | 0.53  | 1.13  | 0.024 |
| 60. | BD | (2) | C20- N50 | 797. | RY* | (2)  | Ru52      | 0.94  | 0.76  | 0.026 |
| 60. | BD | (2) | C20- N50 | 864. | BD* | (2)  | C12- C14  | 20.56 | 0.27  | 0.067 |
| 60. | BD | (2) | C20- N50 | 918. | BD* | (2)  | C21- C23  | 7.52  | 0.27  | 0.041 |
| 61. | BD | (1) | C21- C23 | 365. | RY* | (3)  | C14       | 0.84  | 2.53  | 0.041 |
| 61. | BD | (1) | C21- C23 | 453. | RY* | (1)  | C20       | 0.73  | 2.19  | 0.036 |
| 61. | BD | (1) | C21- C23 | 805. | RY* | (10) | Ru52      | 7.70  | 0.02  | 0.011 |
| 61. | BD | (1) | C21- C23 | 867. | BD* | (1)  | C14- C21  | 0.77  | 1.11  | 0.026 |
| 61. | BD | (1) | C21- C23 | 868. | BD* | (1)  | C14- H31  | 2.48  | 1.04  | 0.045 |
| 61. | BD | (1) | C21- C23 | 923. | BD* | (1)  | C20- C23  | 1.07  | 1.12  | 0.031 |
| 61. | BD | (1) | C21- C23 | 924. | BD* | (1)  | C20- C22  | 3.50  | 1.08  | 0.055 |
| 62. | BD | (2) | C21- C23 | 364. | RY* | (2)  | C14       | 1.02  | 0.83  | 0.029 |
| 62. | BD | (2) | C21- C23 | 458. | RY* | (6)  | C20       | 0.54  | 2.23  | 0.034 |
| 62. | BD | (2) | C21- C23 | 864. | BD* | (2)  | C12- C14  | 12.80 | 0.23  | 0.049 |
| 62. | BD | (2) | C21- C23 | 922. | BD* | (2)  | C20- N50  | 22.34 | 0.21  | 0.064 |
| 63. | BD | (1) | C21- H37 | 363. | RY* | (1)  | C14       | 0.89  | 2.18  | 0.040 |
| 63. | BD | (1) | C21- H37 | 498. | RY* | (1)  | C23       | 0.92  | 2.02  | 0.039 |
| 63. | BD | (1) | C21- H37 | 863. | BD* | (1)  | C12- C14  | 3.38  | 0.95  | 0.051 |
| 63. | BD | (1) | C21- H37 | 923. | BD* | (1)  | C20- C23  | 3.90  | 0.95  | 0.055 |
| 64. | BD | (1) | C22- C25 | 395. | RY* | (3)  | C16       | 0.68  | 1.60  | 0.030 |
| 64. | BD | (1) | C22- C25 | 455. | RY* | (3)  | C20       | 1.32  | 2.55  | 0.052 |
| 64. | BD | (1) | C22- C25 | 545. | RY* | (3)  | C26       | 1.72  | 2.53  | 0.059 |
| 64. | BD | (1) | C22- C25 | 869. | BD* | (1)  | C25- C26  | 1.00  | 1.11  | 0.030 |
| 64. | BD | (1) | C22- C25 | 872. | BD* | (1)  | C26- H40  | 2.34  | 1.02  | 0.044 |
| 64. | BD | (1) | C22- C25 | 921. | BD* | (1)  | C20- N50  | 2.87  | 1.03  | 0.049 |
| 64. | BD | (1) | C22- C25 | 924. | BD* | (1)  | C20- C22  | 0.98  | 1.04  | 0.029 |
| 64. | BD | (1) | C22- C25 | 926. | BD* | (1)  | C16-Ru52  | 3.51  | 0.63  | 0.045 |
| 64. | BD | (1) | C22- C25 | 927. | BD* | (1)  | C16- C22  | 2.18  | 1.11  | 0.044 |
| 65. | BD | (1) | C23- H38 | 453. | RY* | (1)  | C20       | 1.07  | 2.02  | 0.042 |
| 65. | BD | (1) | C23- H38 | 468. | RY* | (1)  | C21       | 0.90  | 2.24  | 0.040 |
| 65. | BD | (1) | C23- H38 | 867. | BD* | (1)  | C14- C21  | 3.52  | 0.93  | 0.051 |
| 65. | BD | (1) | C23- H38 | 921. | BD* | (1)  | C20- N50  | 5.73  | 0.90  | 0.064 |
| 66. | BD | (1) | C24- C26 | 426. | RY* | (4)  | C18       | 0.65  | 1.60  | 0.029 |
| 66. | BD | (1) | C24- C26 | 530. | RY* | (3)  | C25       | 1.02  | 2.35  | 0.044 |
| 66. | BD | (1) | C24- C26 | 869. | BD* | (1)  | C25- C26  | 0.95  | 1.11  | 0.029 |
| 66. | BD | (1) | C24- C26 | 871. | BD* | (1)  | C25- H39  | 2.54  | 1.01  | 0.045 |
| 66. | BD | (1) | C24- C26 | 931. | BD* | (1)  | C18- C24  | 2.82  | 1.10  | 0.027 |
| 66. | BD | (1) | C24- C26 | 933. | BD* | (1)  | C18- H32  | 2.18  | 1.02  | 0.042 |
| 67. | BD | (1) | C24- H36 | 423. | RY* | (1)  | C18       | 0.97  | 2.08  | 0.040 |
| 67. | BD | (1) | C24- H36 | 543. | RY* | (1)  | C26       | 0.91  | 2.17  | 0.040 |
| 67. | BD | (1) | C24- H36 | 869. | BD* | (1)  | C25- C26  | 3.66  | 0.95  | 0.053 |
| 67. | BD | (1) | C24- H36 | 928. | BD* | (1)  | C16- C18  | 4.84  | 0.96  | 0.061 |
| 68. | BD | (1) | C25- C26 | 483. | RY* | (1)  | C22       | 0.77  | 1.96  | 0.035 |
| 68. | BD | (1) | C25- C26 | 515. | RY* | (3)  | C24       | 1.03  | 2.51  | 0.045 |
| 68. | BD | (1) | C25- C26 | 924. | BD* | (1)  | C20- C22  | 3.43  | 1.05  | 0.054 |
| 68. | BD | (1) | C25- C26 | 925. | BD* | (1)  | C22- C25  | 1.27  | 1.11  | 0.034 |
| 68. | BD | (1) | C25- C26 | 929. | BD* | (1)  | C24- C26  | 0.87  | 1.10  | 0.028 |
| 68. | BD | (1) | C25- C26 | 930. | BD* | (1)  | C24- H36  | 2.32  | 1.03  | 0.044 |
| 69. | BD | (2) | C25- C26 | 147. | LP  | (1)  | C22       | 34.38 | 0.12  | 0.073 |
| 69. | BD | (2) | C25- C26 | 484. | RY* | (2)  | C22       | 0.60  | 0.75  | 0.021 |
| 69. | BD | (2) | C25- C26 | 514. | RY* | (2)  | C24       | 0.77  | 0.76  | 0.023 |
| 69. | BD | (2) | C25- C26 | 932. | BD* | (2)  | C18- C24  | 15.22 | 0.23  | 0.053 |
| 70. | BD | (1) | C25- H39 | 483. | RY* | (1)  | C22       | 1.26  | 1.80  | 0.043 |
| 70. | BD | (1) | C25- H39 | 543. | RY* | (1)  | C26       | 0.96  | 2.18  | 0.041 |
| 70. | BD | (1) | C25- H39 | 927. | BD* | (1)  | C16- C22  | 4.99  | 0.96  | 0.062 |
| 70. | BD | (1) | C25- H39 | 929. | BD* | (1)  | C24- C26  | 3.57  | 0.94  | 0.052 |
| 71. | BD | (1) | C26- H40 | 513. | RY* | (1)  | C24       | 0.95  | 2.03  | 0.039 |
| 71. | BD | (1) | C26- H40 | 528. | RY* | (1)  | C25       | 0.95  | 2.00  | 0.039 |
| 71. | BD | (1) | C26- H40 | 925. | BD* | (1)  | C22- C25  | 4.05  | 0.94  | 0.055 |

|      |                  |      |                   |        |          |       |
|------|------------------|------|-------------------|--------|----------|-------|
| 71.  | BD ( 1) C26- H40 | 931. | BD* ( 1) C18- C24 | 3.74   | 0.94     | 0.053 |
| 78.  | CR ( 1) C 6      | 676. | RY*( 4) O46       | 0.90   | 10.38    | 0.086 |
| 80.  | CR ( 1) C 8      | 691. | RY*( 4) O47       | 0.80   | 10.34    | 0.081 |
| 84.  | CR ( 1) C12      | 363. | RY*( 1) C14       | 0.71   | 11.52    | 0.081 |
| 84.  | CR ( 1) C12      | 365. | RY*( 3) C14       | 0.71   | 11.70    | 0.081 |
| 84.  | CR ( 1) C12      | 921. | BD*( 1) C20- N50  | 1.02   | 10.25    | 0.092 |
| 86.  | CR ( 1) C14      | 335. | RY*( 3) C12       | 0.62   | 11.50    | 0.075 |
| 86.  | CR ( 1) C14      | 336. | RY*( 4) C12       | 0.80   | 11.11    | 0.084 |
| 86.  | CR ( 1) C14      | 469. | RY*( 2) C21       | 1.00   | 11.52    | 0.096 |
| 86.  | CR ( 1) C14      | 865. | BD*( 1) C12- N50  | 0.74   | 10.23    | 0.078 |
| 88.  | CR ( 1) C16      | 425. | RY*( 3) C18       | 1.01   | 11.43    | 0.096 |
| 88.  | CR ( 1) C16      | 483. | RY*( 1) C22       | 0.54   | 11.11    | 0.069 |
| 88.  | CR ( 1) C16      | 485. | RY*( 3) C22       | 0.91   | 11.51    | 0.091 |
| 88.  | CR ( 1) C16      | 924. | BD*( 1) C20- C22  | 0.67   | 10.20    | 0.074 |
| 88.  | CR ( 1) C16      | 925. | BD*( 1) C22- C25  | 0.74   | 10.26    | 0.078 |
| 88.  | CR ( 1) C16      | 931. | BD*( 1) C18- C24  | 0.59   | 10.26    | 0.070 |
| 90.  | CR ( 1) C18      | 395. | RY*( 3) C16       | 1.17   | 10.73    | 0.100 |
| 90.  | CR ( 1) C18      | 515. | RY*( 3) C24       | 0.93   | 11.64    | 0.093 |
| 90.  | CR ( 1) C18      | 926. | BD*( 1) C16-Ru52  | 0.80   | 9.76     | 0.085 |
| 92.  | CR ( 1) C20      | 483. | RY*( 1) C22       | 0.54   | 11.17    | 0.070 |
| 92.  | CR ( 1) C20      | 498. | RY*( 1) C23       | 0.61   | 11.36    | 0.074 |
| 92.  | CR ( 1) C20      | 735. | RY*( 3) N50       | 0.53   | 11.96    | 0.071 |
| 92.  | CR ( 1) C20      | 865. | BD*( 1) C12- N50  | 0.92   | 10.27    | 0.087 |
| 92.  | CR ( 1) C20      | 925. | BD*( 1) C22- C25  | 0.61   | 10.32    | 0.071 |
| 92.  | CR ( 1) C20      | 927. | BD*( 1) C16- C22  | 0.61   | 10.33    | 0.072 |
| 93.  | CR ( 1) C21      | 365. | RY*( 3) C14       | 1.29   | 11.66    | 0.110 |
| 93.  | CR ( 1) C21      | 500. | RY*( 3) C23       | 1.35   | 11.45    | 0.111 |
| 93.  | CR ( 1) C21      | 923. | BD*( 1) C20- C23  | 0.51   | 10.26    | 0.065 |
| 94.  | CR ( 1) C22      | 393. | RY*( 1) C16       | 0.53   | 10.82    | 0.068 |
| 94.  | CR ( 1) C22      | 395. | RY*( 3) C16       | 0.74   | 10.75    | 0.079 |
| 94.  | CR ( 1) C22      | 453. | RY*( 1) C20       | 0.58   | 11.30    | 0.072 |
| 94.  | CR ( 1) C22      | 528. | RY*( 1) C25       | 0.51   | 11.31    | 0.068 |
| 94.  | CR ( 1) C22      | 530. | RY*( 3) C25       | 0.58   | 11.50    | 0.073 |
| 94.  | CR ( 1) C22      | 921. | BD*( 1) C20- N50  | 0.52   | 10.18    | 0.066 |
| 94.  | CR ( 1) C22      | 923. | BD*( 1) C20- C23  | 0.78   | 10.23    | 0.080 |
| 94.  | CR ( 1) C22      | 926. | BD*( 1) C16-Ru52  | 0.60   | 9.78     | 0.074 |
| 95.  | CR ( 1) C23      | 455. | RY*( 3) C20       | 1.18   | 11.72    | 0.105 |
| 95.  | CR ( 1) C23      | 469. | RY*( 2) C21       | 1.19   | 11.52    | 0.105 |
| 95.  | CR ( 1) C23      | 921. | BD*( 1) C20- N50  | 0.68   | 10.21    | 0.075 |
| 95.  | CR ( 1) C23      | 924. | BD*( 1) C20- C22  | 0.89   | 10.21    | 0.086 |
| 96.  | CR ( 1) C24      | 425. | RY*( 3) C18       | 0.82   | 11.42    | 0.086 |
| 96.  | CR ( 1) C24      | 426. | RY*( 4) C18       | 0.65   | 10.75    | 0.075 |
| 96.  | CR ( 1) C24      | 545. | RY*( 3) C26       | 0.84   | 11.68    | 0.089 |
| 96.  | CR ( 1) C24      | 928. | BD*( 1) C16- C18  | 0.86   | 10.27    | 0.084 |
| 97.  | CR ( 1) C25      | 485. | RY*( 3) C22       | 0.95   | 11.50    | 0.093 |
| 97.  | CR ( 1) C25      | 545. | RY*( 3) C26       | 1.27   | 11.68    | 0.109 |
| 97.  | CR ( 1) C25      | 924. | BD*( 1) C20- C22  | 0.77   | 10.19    | 0.080 |
| 97.  | CR ( 1) C25      | 927. | BD*( 1) C16- C22  | 0.91   | 10.27    | 0.087 |
| 98.  | CR ( 1) C26      | 515. | RY*( 3) C24       | 1.27   | 11.64    | 0.108 |
| 98.  | CR ( 1) C26      | 530. | RY*( 3) C25       | 1.29   | 11.49    | 0.109 |
| 98.  | CR ( 1) C26      | 925. | BD*( 1) C22- C25  | 0.57   | 10.25    | 0.069 |
| 101. | CR ( 1) O46      | 243. | RY*( 1) C 6       | 5.01   | 20.07    | 0.284 |
| 101. | CR ( 1) O46      | 882. | BD*( 1) C 6-Ru52  | 0.61   | 18.68    | 0.104 |
| 102. | CR ( 1) O47      | 273. | RY*( 1) C 8       | 4.53   | 19.94    | 0.269 |
| 102. | CR ( 1) O47      | 881. | BD*( 1) C 8-Ru52  | 0.69   | 18.65    | 0.111 |
| 105. | CR ( 1) N50      | 333. | RY*( 1) C12       | 0.90   | 15.39    | 0.105 |
| 105. | CR ( 1) N50      | 335. | RY*( 3) C12       | 1.01   | 15.59    | 0.112 |
| 105. | CR ( 1) N50      | 453. | RY*( 1) C20       | 0.97   | 15.42    | 0.109 |
| 105. | CR ( 1) N50      | 455. | RY*( 3) C20       | 0.94   | 15.81    | 0.109 |
| 105. | CR ( 1) N50      | 882. | BD*( 1) C 6-Ru52  | 4.45   | 13.99    | 0.243 |
| 125. | CR ( 2) Ru52     | 820. | RY*(25) Ru52      | 1.46   | 879.79   | 1.012 |
| 125. | CR ( 2) Ru52     | 824. | RY*(29) Ru52      | 1.78   | 94.31    | 0.366 |
| 125. | CR ( 2) Ru52     | 828. | RY*(33) Ru52      | 3.39   | 270.06   | 0.855 |
| 125. | CR ( 2) Ru52     | 836. | RY*(41) Ru52      | 1.68   | 891.42   | 1.092 |
| 125. | CR ( 2) Ru52     | 880. | BD*( 3) C 8- O47  | 0.93   | 115.30   | 0.294 |
| 125. | CR ( 2) Ru52     | 885. | BD*( 3) C 6- O46  | 1.05   | 115.31   | 0.312 |
| 126. | CR ( 3) Ru52     | 796. | RY*( 1) Ru52      | 1.52   | 21.74    | 0.163 |
| 126. | CR ( 3) Ru52     | 797. | RY*( 2) Ru52      | 1.73   | 22.36    | 0.176 |
| 126. | CR ( 3) Ru52     | 803. | RY*( 8) Ru52      | 0.63   | 22.97    | 0.108 |
| 126. | CR ( 3) Ru52     | 805. | RY*(10) Ru52      | 3.24   | 21.25    | 0.234 |
| 126. | CR ( 3) Ru52     | 807. | RY*(12) Ru52      | 0.54   | 28.94    | 0.111 |
| 126. | CR ( 3) Ru52     | 810. | RY*(15) Ru52      | 1.10   | 27.97    | 0.157 |
| 126. | CR ( 3) Ru52     | 811. | RY*(16) Ru52      | 0.63   | 27.90    | 0.118 |
| 126. | CR ( 3) Ru52     | 812. | RY*(17) Ru52      | 0.91   | 25.80    | 0.137 |
| 126. | CR ( 3) Ru52     | 815. | RY*(20) Ru52      | 1.69   | 17.73    | 0.154 |
| 126. | CR ( 3) Ru52     | 818. | RY*(23) Ru52      | 0.72   | 28.43    | 0.128 |
| 126. | CR ( 3) Ru52     | 820. | RY*(25) Ru52      | 2.41   | 786.95   | 1.230 |
| 126. | CR ( 3) Ru52     | 824. | RY*(29) Ru52      | 159.98 | 1.48     | 0.435 |
| 126. | CR ( 3) Ru52     | 825. | RY*(30) Ru52      | 0.57   | 20.36    | 0.096 |
| 126. | CR ( 3) Ru52     | 828. | RY*(33) Ru52      | 7.89   | 177.23   | 1.055 |
| 126. | CR ( 3) Ru52     | 833. | RY*(38) Ru52      | 1.55   | 3383.31  | 2.042 |
| 126. | CR ( 3) Ru52     | 836. | RY*(41) Ru52      | 3.50   | 798.59   | 1.492 |
| 126. | CR ( 3) Ru52     | 865. | BD*( 1) C12- N50  | 0.83   | 22.32    | 0.122 |
| 126. | CR ( 3) Ru52     | 880. | BD*( 3) C 8- O47  | 3.66   | 22.47    | 0.257 |
| 126. | CR ( 3) Ru52     | 885. | BD*( 3) C 6- O46  | 4.11   | 22.48    | 0.273 |
| 126. | CR ( 3) Ru52     | 921. | BD*( 1) C20- N50  | 0.62   | 22.30    | 0.106 |
| 126. | CR ( 3) Ru52     | 926. | BD*( 1) C16-Ru52  | 0.80   | 21.90    | 0.127 |
| 126. | CR ( 3) Ru52     | 927. | BD*( 1) C16- C22  | 0.64   | 22.39    | 0.108 |
| 126. | CR ( 3) Ru52     | 928. | BD*( 1) C16- C18  | 1.47   | 22.40    | 0.163 |
| 127. | CR ( 4) Ru52     | 243. | RY*( 1) C 6       | 3.14   | 6.10     | 0.123 |
| 127. | CR ( 4) Ru52     | 273. | RY*( 1) C 8       | 2.35   | 5.96     | 0.106 |
| 127. | CR ( 4) Ru52     | 805. | RY*(10) Ru52      | 0.69   | 3.96     | 0.047 |
| 127. | CR ( 4) Ru52     | 821. | RY*(26) Ru52      | 0.54   | 12903.94 | 2.367 |
| 127. | CR ( 4) Ru52     | 828. | RY*(33) Ru52      | 1.13   | 159.95   | 0.381 |
| 127. | CR ( 4) Ru52     | 833. | RY*(38) Ru52      | 1.00   | 3366.02  | 1.644 |
| 127. | CR ( 4) Ru52     | 865. | BD*( 1) C12- N50  | 2.48   | 5.04     | 0.100 |
| 127. | CR ( 4) Ru52     | 880. | BD*( 3) C 8- O47  | 10.66  | 5.19     | 0.210 |
| 127. | CR ( 4) Ru52     | 885. | BD*( 3) C 6- O46  | 11.71  | 5.20     | 0.220 |
| 127. | CR ( 4) Ru52     | 921. | BD*( 1) C20- N50  | 1.92   | 5.02     | 0.088 |
| 127. | CR ( 4) Ru52     | 926. | BD*( 1) C16-Ru52  | 2.47   | 4.61     | 0.102 |
| 127. | CR ( 4) Ru52     | 927. | BD*( 1) C16- C22  | 1.59   | 4.10     | 0.081 |
| 127. | CR ( 4) Ru52     | 928. | BD*( 1) C16- C18  | 4.05   | 5.11     | 0.129 |
| 130. | CR ( 7) Ru52     | 890. | BD*( 3) C 8- O47  | 1.02   | 2.42     | 0.044 |
| 130. | CR ( 7) Ru52     | 881. | BD*( 1) C 8-Ru52  | 2.35   | 1.91     | 0.065 |
| 130. | CR ( 7) Ru52     | 882. | BD*( 1) C 6-Ru52  | 3.68   | 1.94     | 0.082 |
| 130. | CR ( 7) Ru52     | 885. | BD*( 3) C 6- O46  | 1.98   | 2.43     | 0.062 |
| 133. | CR (10) Ru52     | 805. | RY*(10) Ru52      | 1.92   | 1.20     | 0.043 |
| 133. | CR (10) Ru52     | 825. | RY*(30) Ru52      | 7.72   | 0.31     | 0.044 |
| 133. | CR (10) Ru52     | 878. | BD*( 1) C 8- O47  | 0.58   | 1.83     | 0.031 |
| 133. | CR (10) Ru52     | 880. | BD*( 3) C 8- O47  | 1.00   | 2.42     | 0.044 |
| 133. | CR (10) Ru52     | 881. | BD*( 1) C 8-Ru52  | 4.08   | 1.91     | 0.086 |
| 133. | CR (10) Ru52     | 882. | BD*( 1) C 6-Ru52  | 1.61   | 1.94     | 0.054 |
| 133. | CR (10) Ru52     | 884. | BD*( 2) C 6- O46  | 0.98   | 1.83     | 0.040 |
| 133. | CR (10) Ru52     | 926. | BD*( 1) C16-Ru52  | 2.38   | 1.85     | 0.064 |
| 136. | CR (13) Ru52     | 880. | BD*( 3) C 8- O47  | 0.68   | 2.42     | 0.036 |
| 136. | CR (13) Ru52     | 881. | BD*( 1) C 8-Ru52  | 1.60   | 1.90     | 0.054 |

|                       |    |              |      |                 |           |         |       |
|-----------------------|----|--------------|------|-----------------|-----------|---------|-------|
| 136.                  | CR | (13)Ru52     | 882. | BD*(1) C 6-Ru52 | 0.89      | 1.94    | 0.040 |
| 136.                  | CR | (13)Ru52     | 883. | BD*(1) C 6- O46 | 0.84      | 1.84    | 0.037 |
| 136.                  | CR | (13)Ru52     | 926. | BD*(1) C16-Ru52 | 3.94      | 1.84    | 0.082 |
| 147.                  | LP | (1) C22      | 167. | LP*(1) C16      | 1155.20   | 0.01    | 0.114 |
| 147.                  | LP | (1) C22      | 394. | RY*(2) C16      | 0.99      | 0.71    | 0.033 |
| 147.                  | LP | (1) C22      | 457. | RY*(5) C20      | 0.86      | 1.84    | 0.049 |
| 147.                  | LP | (1) C22      | 484. | RY*(2) C22      | 2.61      | 0.63    | 0.050 |
| 147.                  | LP | (1) C22      | 529. | RY*(2) C25      | 2.92      | 0.61    | 0.052 |
| 147.                  | LP | (1) C22      | 870. | BD*(2) C25- C26 | 57.78     | 0.11    | 0.085 |
| 147.                  | LP | (1) C22      | 922. | BD*(2) C20- N50 | 133.83    | 0.06    | 0.088 |
| 147.                  | LP | (1) C22      | 932. | BD*(2) C18- C24 | 0.73      | 0.11    | 0.010 |
| 152.                  | LP | (1) O46      | 243. | RY*(1) C 6      | 11.86     | 2.17    | 0.143 |
| 152.                  | LP | (1) O46      | 250. | RY*(8) C 6      | 0.87      | 4.55    | 0.057 |
| 152.                  | LP | (1) O46      | 251. | RY*(9) C 6      | 0.92      | 3.72    | 0.052 |
| 152.                  | LP | (1) O46      | 796. | RY*(1) Ru52     | 0.94      | 0.53    | 0.020 |
| 152.                  | LP | (1) O46      | 805. | RY*(10) Ru52    | 20.03     | 0.03    | 0.023 |
| 152.                  | LP | (1) O46      | 882. | BD*(1) C 6-Ru52 | 3.29      | 0.78    | 0.049 |
| 153.                  | LP | (1) O47      | 273. | RY*(1) C 8      | 11.34     | 2.04    | 0.136 |
| 153.                  | LP | (1) O47      | 274. | RY*(2) C 8      | 0.99      | 2.65    | 0.046 |
| 153.                  | LP | (1) O47      | 280. | RY*(8) C 8      | 0.90      | 4.69    | 0.058 |
| 153.                  | LP | (1) O47      | 796. | RY*(1) Ru52     | 0.78      | 0.53    | 0.018 |
| 153.                  | LP | (1) O47      | 805. | RY*(10) Ru52    | 5.52      | 0.04    | 0.013 |
| 153.                  | LP | (1) O47      | 881. | BD*(1) C 8-Ru52 | 3.50      | 0.75    | 0.050 |
| 156.                  | LP | (1) N50      | 273. | RY*(1) C 8      | 0.85      | 1.73    | 0.037 |
| 156.                  | LP | (1) N50      | 333. | RY*(1) C12      | 2.30      | 1.88    | 0.064 |
| 156.                  | LP | (1) N50      | 338. | RY*(6) C12      | 0.79      | 3.16    | 0.049 |
| 156.                  | LP | (1) N50      | 453. | RY*(1) C20      | 2.41      | 1.90    | 0.066 |
| 156.                  | LP | (1) N50      | 455. | RY*(3) C20      | 0.73      | 2.30    | 0.040 |
| 156.                  | LP | (1) N50      | 459. | RY*(7) C20      | 0.82      | 3.73    | 0.054 |
| 156.                  | LP | (1) N50      | 796. | RY*(1) Ru52     | 12.96     | 0.23    | 0.053 |
| 156.                  | LP | (1) N50      | 797. | RY*(2) Ru52     | 3.92      | 0.84    | 0.056 |
| 156.                  | LP | (1) N50      | 798. | RY*(3) Ru52     | 1.38      | 1.08    | 0.038 |
| 156.                  | LP | (1) N50      | 801. | RY*(6) Ru52     | 1.17      | 1.50    | 0.041 |
| 156.                  | LP | (1) N50      | 807. | RY*(12) Ru52    | 0.57      | 7.43    | 0.063 |
| 156.                  | LP | (1) N50      | 811. | RY*(16) Ru52    | 0.93      | 6.39    | 0.075 |
| 156.                  | LP | (1) N50      | 818. | RY*(23) Ru52    | 1.17      | 6.92    | 0.088 |
| 156.                  | LP | (1) N50      | 820. | RY*(25) Ru52    | 0.69      | 765.44  | 0.710 |
| 156.                  | LP | (1) N50      | 821. | RY*(26) Ru52    | 0.5312899 | 70      | 2.547 |
| 156.                  | LP | (1) N50      | 833. | RY*(38) Ru52    | 0.63      | 3361.79 | 1.419 |
| 156.                  | LP | (1) N50      | 863. | BD*(1) C12- C14 | 7.44      | 0.83    | 0.076 |
| 156.                  | LP | (1) N50      | 866. | BD*(1) C12- H29 | 2.79      | 0.73    | 0.044 |
| 156.                  | LP | (1) N50      | 879. | BD*(2) C 8- O47 | 1.13      | 0.36    | 0.019 |
| 156.                  | LP | (1) N50      | 880. | BD*(3) C 8- O47 | 0.71      | 0.96    | 0.025 |
| 156.                  | LP | (1) N50      | 882. | BD*(1) C 6-Ru52 | 70.67     | 0.48    | 0.164 |
| 156.                  | LP | (1) N50      | 923. | BD*(1) C20- C23 | 7.55      | 0.83    | 0.077 |
| 156.                  | LP | (1) N50      | 924. | BD*(1) C20- C22 | 1.61      | 0.79    | 0.035 |
| 156.                  | LP | (1) N50      | 925. | BD*(1) C22- C25 | 0.57      | 0.86    | 0.021 |
| 156.                  | LP | (1) N50      | 926. | BD*(1) C16-Ru52 | 2.46      | 0.38    | 0.028 |
| 156.                  | LP | (1) N50      | 928. | BD*(1) C16- C18 | 1.46      | 0.88    | 0.035 |
| 160.                  | LP | (1) Ru52     | 167. | LP*(1) C16      | 4.28      | 0.11    | 0.024 |
| 160.                  | LP | (1) Ru52     | 246. | RY*(4) C 6      | 1.67      | 1.81    | 0.052 |
| 160.                  | LP | (1) Ru52     | 394. | RY*(2) C16      | 0.66      | 0.81    | 0.022 |
| 160.                  | LP | (1) Ru52     | 395. | RY*(3) C16      | 0.75      | 1.18    | 0.028 |
| 160.                  | LP | (1) Ru52     | 467. | RY*(15) C20     | 0.56      | 24.15   | 0.111 |
| 160.                  | LP | (1) Ru52     | 735. | RY*(3) N50      | 2.29      | 2.33    | 0.069 |
| 160.                  | LP | (1) Ru52     | 796. | RY*(1) Ru52     | 14.64     | 0.05    | 0.026 |
| 160.                  | LP | (1) Ru52     | 865. | BD*(1) C12- N50 | 0.56      | 0.63    | 0.018 |
| 160.                  | LP | (1) Ru52     | 878. | BD*(1) C 8- O47 | 5.66      | 0.19    | 0.029 |
| 160.                  | LP | (1) Ru52     | 883. | BD*(1) C 6- O46 | 11.35     | 0.20    | 0.043 |
| 160.                  | LP | (1) Ru52     | 884. | BD*(2) C 6- O46 | 10.97     | 0.19    | 0.041 |
| 160.                  | LP | (1) Ru52     | 921. | BD*(1) C20- N50 | 0.51      | 0.61    | 0.017 |
| 160.                  | LP | (1) Ru52     | 928. | BD*(1) C16- C18 | 0.69      | 0.71    | 0.021 |
| 161.                  | LP | (2) Ru52     | 167. | LP*(1) C16      | 13.29     | 0.12    | 0.042 |
| 161.                  | LP | (2) Ru52     | 246. | RY*(4) C 6      | 0.81      | 1.81    | 0.037 |
| 161.                  | LP | (2) Ru52     | 276. | RY*(4) C 8      | 2.23      | 2.06    | 0.065 |
| 161.                  | LP | (2) Ru52     | 394. | RY*(2) C16      | 1.75      | 0.82    | 0.036 |
| 161.                  | LP | (2) Ru52     | 796. | RY*(1) Ru52     | 3.63      | 0.06    | 0.014 |
| 161.                  | LP | (2) Ru52     | 797. | RY*(2) Ru52     | 1.87      | 0.67    | 0.034 |
| 161.                  | LP | (2) Ru52     | 878. | BD*(1) C 8- O47 | 23.24     | 0.19    | 0.060 |
| 161.                  | LP | (2) Ru52     | 879. | BD*(2) C 8- O47 | 1.39      | 0.19    | 0.015 |
| 161.                  | LP | (2) Ru52     | 883. | BD*(1) C 6- O46 | 2.30      | 0.20    | 0.020 |
| 161.                  | LP | (2) Ru52     | 884. | BD*(2) C 6- O46 | 3.49      | 0.19    | 0.023 |
| 161.                  | LP | (2) Ru52     | 926. | BD*(1) C16-Ru52 | 0.87      | 0.21    | 0.012 |
| 162.                  | LP | (3) Ru52     | 244. | RY*(2) C 6      | 3.13      | 1.09    | 0.057 |
| 162.                  | LP | (3) Ru52     | 275. | RY*(3) C 8      | 3.02      | 1.20    | 0.059 |
| 162.                  | LP | (3) Ru52     | 734. | RY*(2) N50      | 2.29      | 1.05    | 0.048 |
| 162.                  | LP | (3) Ru52     | 797. | RY*(2) Ru52     | 0.53      | 0.68    | 0.019 |
| 162.                  | LP | (3) Ru52     | 818. | RY*(23) Ru52    | 0.69      | 6.76    | 0.067 |
| 162.                  | LP | (3) Ru52     | 878. | BD*(1) C 8- O47 | 1.15      | 0.21    | 0.014 |
| 162.                  | LP | (3) Ru52     | 879. | BD*(2) C 8- O47 | 23.12     | 0.20    | 0.063 |
| 162.                  | LP | (3) Ru52     | 883. | BD*(1) C 6- O46 | 10.62     | 0.21    | 0.044 |
| 162.                  | LP | (3) Ru52     | 884. | BD*(2) C 6- O46 | 12.25     | 0.20    | 0.046 |
| 162.                  | LP | (3) Ru52     | 922. | BD*(2) C20- N50 | 3.59      | 0.17    | 0.023 |
| from unit 2 to unit 3 |    |              |      |                 |           |         |       |
| 18.                   | BD | (3) C 6- O46 | 638. | RY*(1) H43      | 0.11      | 2.60    | 0.015 |
| 18.                   | BD | (3) C 6- O46 | 640. | RY*(3) H43      | 0.40      | 3.18    | 0.032 |
| 18.                   | BD | (3) C 6- O46 | 642. | RY*(5) H43      | 0.05      | 3.53    | 0.012 |
| 18.                   | BD | (3) C 6- O46 | 661. | RY*(4) O45      | 0.09      | 4.97    | 0.019 |
| 18.                   | BD | (3) C 6- O46 | 668. | RY*(11) O45     | 0.08      | 6.21    | 0.020 |
| 19.                   | BD | (1) C 6-Ru52 | 638. | RY*(1) H43      | 0.13      | 2.04    | 0.015 |
| 19.                   | BD | (1) C 6-Ru52 | 658. | RY*(1) O45      | 0.26      | 2.89    | 0.025 |
| 19.                   | BD | (1) C 6-Ru52 | 659. | RY*(2) O45      | 0.32      | 2.04    | 0.023 |
| 19.                   | BD | (1) C 6-Ru52 | 660. | RY*(3) O45      | 1.99      | 2.66    | 0.066 |
| 19.                   | BD | (1) C 6-Ru52 | 661. | RY*(4) O45      | 0.35      | 4.42    | 0.036 |
| 19.                   | BD | (1) C 6-Ru52 | 662. | RY*(5) O45      | 0.28      | 2.77    | 0.025 |
| 19.                   | BD | (1) C 6-Ru52 | 664. | RY*(7) O45      | 0.09      | 2.76    | 0.014 |
| 19.                   | BD | (1) C 6-Ru52 | 667. | RY*(10) O45     | 0.09      | 5.39    | 0.020 |
| 19.                   | BD | (1) C 6-Ru52 | 669. | RY*(12) O45     | 0.26      | 4.83    | 0.032 |
| 19.                   | BD | (1) C 6-Ru52 | 670. | RY*(13) O45     | 0.05      | 92.63   | 0.062 |
| 19.                   | BD | (1) C 6-Ru52 | 671. | RY*(14) O45     | 0.05      | 5.17    | 0.015 |
| 19.                   | BD | (1) C 6-Ru52 | 672. | RY*(15) O45     | 0.12      | 76.16   | 0.085 |
| 19.                   | BD | (1) C 6-Ru52 | 934. | BD*(1) H43- O45 | 0.12      | 0.98    | 0.010 |
| 25.                   | BD | (3) C 8- O47 | 640. | RY*(3) H43      | 0.46      | 3.19    | 0.034 |
| 25.                   | BD | (3) C 8- O47 | 659. | RY*(2) O45      | 0.17      | 2.60    | 0.019 |
| 25.                   | BD | (3) C 8- O47 | 660. | RY*(3) O45      | 0.06      | 3.22    | 0.012 |
| 26.                   | BD | (1) C 8-Ru52 | 638. | RY*(1) H43      | 0.17      | 2.04    | 0.017 |
| 26.                   | BD | (1) C 8-Ru52 | 640. | RY*(3) H43      | 0.35      | 2.62    | 0.028 |
| 26.                   | BD | (1) C 8-Ru52 | 658. | RY*(1) O45      | 0.08      | 2.89    | 0.014 |
| 26.                   | BD | (1) C 8-Ru52 | 659. | RY*(2) O45      | 0.05      | 2.04    | 0.009 |
| 26.                   | BD | (1) C 8-Ru52 | 660. | RY*(3) O45      | 0.79      | 2.66    | 0.042 |
| 26.                   | BD | (1) C 8-Ru52 | 661. | RY*(4) O45      | 0.46      | 4.42    | 0.041 |
| 26.                   | BD | (1) C 8-Ru52 | 662. | RY*(5) O45      | 0.09      | 2.77    | 0.015 |
| 26.                   | BD | (1) C 8-Ru52 | 667. | RY*(10) O45     | 0.18      | 5.39    | 0.028 |
| 26.                   | BD | (1) C 8-Ru52 | 668. | RY*(11) O45     | 0.10      | 5.65    | 0.022 |
| 26.                   | BD | (1) C 8-Ru52 | 669. | RY*(12) O45     | 0.37      | 4.84    | 0.039 |

|                       |    |      |          |      |         |          |      |        |       |
|-----------------------|----|------|----------|------|---------|----------|------|--------|-------|
| 26.                   | BD | (1)  | C 8-Ru52 | 671. | RY*(14) | O45      | 0.08 | 5.18   | 0.019 |
| 26.                   | BD | (1)  | C 8-Ru52 | 672. | RY*(15) | O45      | 0.12 | 76.16  | 0.086 |
| 39.                   | BD | (1)  | C12- H29 | 638. | RY*(1)  | H43      | 0.06 | 2.00   | 0.010 |
| 39.                   | BD | (1)  | C12- H29 | 640. | RY*(3)  | H43      | 0.13 | 2.59   | 0.016 |
| 39.                   | BD | (1)  | C12- H29 | 660. | RY*(3)  | O45      | 0.05 | 2.62   | 0.010 |
| 39.                   | BD | (1)  | C12- H29 | 661. | RY*(4)  | O45      | 0.06 | 4.38   | 0.015 |
| 40.                   | BD | (1)  | C12- N50 | 659. | RY*(2)  | O45      | 0.10 | 2.29   | 0.014 |
| 40.                   | BD | (1)  | C12- N50 | 934. | BD*(1)  | H43- O45 | 0.10 | 1.23   | 0.010 |
| 47.                   | BD | (1)  | C16- C18 | 640. | RY*(3)  | H43      | 0.31 | 2.71   | 0.026 |
| 47.                   | BD | (1)  | C16- C18 | 642. | RY*(5)  | H43      | 0.05 | 3.06   | 0.011 |
| 47.                   | BD | (1)  | C16- C18 | 658. | RY*(1)  | O45      | 0.07 | 2.98   | 0.013 |
| 47.                   | BD | (1)  | C16- C18 | 659. | RY*(2)  | O45      | 0.20 | 2.13   | 0.019 |
| 49.                   | BD | (1)  | C16-Ru52 | 639. | RY*(2)  | H43      | 0.12 | 2.07   | 0.015 |
| 49.                   | BD | (1)  | C16-Ru52 | 640. | RY*(3)  | H43      | 0.77 | 2.45   | 0.040 |
| 49.                   | BD | (1)  | C16-Ru52 | 641. | RY*(4)  | H43      | 0.08 | 2.97   | 0.015 |
| 49.                   | BD | (1)  | C16-Ru52 | 642. | RY*(5)  | H43      | 0.11 | 2.81   | 0.016 |
| 49.                   | BD | (1)  | C16-Ru52 | 658. | RY*(1)  | O45      | 0.64 | 2.72   | 0.039 |
| 49.                   | BD | (1)  | C16-Ru52 | 659. | RY*(2)  | O45      | 0.46 | 1.87   | 0.027 |
| 49.                   | BD | (1)  | C16-Ru52 | 660. | RY*(3)  | O45      | 0.30 | 2.49   | 0.025 |
| 49.                   | BD | (1)  | C16-Ru52 | 661. | RY*(4)  | O45      | 0.27 | 4.25   | 0.032 |
| 49.                   | BD | (1)  | C16-Ru52 | 662. | RY*(5)  | O45      | 0.06 | 2.60   | 0.011 |
| 49.                   | BD | (1)  | C16-Ru52 | 663. | RY*(6)  | O45      | 0.13 | 3.00   | 0.019 |
| 49.                   | BD | (1)  | C16-Ru52 | 664. | RY*(7)  | O45      | 0.12 | 2.59   | 0.016 |
| 49.                   | BD | (1)  | C16-Ru52 | 665. | RY*(8)  | O45      | 0.08 | 2.16   | 0.012 |
| 49.                   | BD | (1)  | C16-Ru52 | 666. | RY*(9)  | O45      | 0.12 | 2.70   | 0.017 |
| 49.                   | BD | (1)  | C16-Ru52 | 668. | RY*(11) | O45      | 0.17 | 5.48   | 0.028 |
| 49.                   | BD | (1)  | C16-Ru52 | 670. | RY*(13) | O45      | 0.21 | 92.47  | 0.129 |
| 49.                   | BD | (1)  | C16-Ru52 | 672. | RY*(15) | O45      | 0.28 | 75.99  | 0.134 |
| 59.                   | BD | (1)  | C20- N50 | 638. | RY*(1)  | H43      | 0.09 | 2.27   | 0.013 |
| 130.                  | CR | (7)  | Ru52     | 934. | BD*(1)  | H43- O45 | 0.05 | 2.29   | 0.010 |
| 133.                  | CR | (10) | Ru52     | 934. | BD*(1)  | H43- O45 | 0.08 | 2.29   | 0.012 |
| 156.                  | LP | (1)  | N50      | 638. | RY*(1)  | H43      | 0.07 | 1.89   | 0.011 |
| 156.                  | LP | (1)  | N50      | 658. | RY*(1)  | O45      | 0.05 | 2.74   | 0.012 |
| 156.                  | LP | (1)  | N50      | 659. | RY*(2)  | O45      | 0.07 | 1.88   | 0.011 |
| 160.                  | LP | (1)  | Ru52     | 638. | RY*(1)  | H43      | 0.05 | 1.71   | 0.009 |
| 160.                  | LP | (1)  | Ru52     | 640. | RY*(3)  | H43      | 0.06 | 2.29   | 0.011 |
| 160.                  | LP | (1)  | Ru52     | 658. | RY*(1)  | O45      | 0.22 | 2.56   | 0.023 |
| 160.                  | LP | (1)  | Ru52     | 659. | RY*(2)  | O45      | 0.71 | 1.71   | 0.033 |
| 160.                  | LP | (1)  | Ru52     | 660. | RY*(3)  | O45      | 0.19 | 2.33   | 0.020 |
| 160.                  | LP | (1)  | Ru52     | 661. | RY*(4)  | O45      | 0.34 | 4.09   | 0.035 |
| 160.                  | LP | (1)  | Ru52     | 663. | RY*(6)  | O45      | 0.05 | 2.83   | 0.012 |
| 160.                  | LP | (1)  | Ru52     | 664. | RY*(7)  | O45      | 0.06 | 2.43   | 0.011 |
| 160.                  | LP | (1)  | Ru52     | 668. | RY*(11) | O45      | 0.27 | 5.32   | 0.036 |
| 160.                  | LP | (1)  | Ru52     | 934. | BD*(1)  | H43- O45 | 0.20 | 0.65   | 0.011 |
| 161.                  | LP | (2)  | Ru52     | 638. | RY*(1)  | H43      | 0.18 | 1.71   | 0.017 |
| 161.                  | LP | (2)  | Ru52     | 639. | RY*(2)  | H43      | 0.07 | 1.91   | 0.011 |
| 161.                  | LP | (2)  | Ru52     | 640. | RY*(3)  | H43      | 0.40 | 2.29   | 0.029 |
| 161.                  | LP | (2)  | Ru52     | 641. | RY*(4)  | H43      | 0.10 | 2.81   | 0.016 |
| 161.                  | LP | (2)  | Ru52     | 658. | RY*(1)  | O45      | 0.56 | 2.56   | 0.037 |
| 161.                  | LP | (2)  | Ru52     | 659. | RY*(2)  | O45      | 0.31 | 1.71   | 0.022 |
| 161.                  | LP | (2)  | Ru52     | 660. | RY*(3)  | O45      | 0.35 | 2.33   | 0.028 |
| 161.                  | LP | (2)  | Ru52     | 664. | RY*(7)  | O45      | 0.06 | 2.43   | 0.011 |
| 161.                  | LP | (2)  | Ru52     | 667. | RY*(10) | O45      | 0.10 | 5.06   | 0.022 |
| from unit 2 to unit 4 |    |      |          |      |         |          |      |        |       |
| 16.                   | BD | (1)  | C 6- O46 | 848. | RY*(5)  | C153     | 0.06 | 6.90   | 0.019 |
| 17.                   | BD | (2)  | C 6- O46 | 853. | RY*(10) | C153     | 0.06 | 4.95   | 0.016 |
| 18.                   | BD | (3)  | C 6- O46 | 846. | RY*(3)  | C153     | 0.20 | 7.13   | 0.034 |
| 18.                   | BD | (3)  | C 6- O46 | 847. | RY*(4)  | C153     | 0.13 | 3.49   | 0.019 |
| 18.                   | BD | (3)  | C 6- O46 | 848. | RY*(5)  | C153     | 0.47 | 7.59   | 0.053 |
| 18.                   | BD | (3)  | C 6- O46 | 850. | RY*(7)  | C153     | 0.06 | 4.76   | 0.015 |
| 18.                   | BD | (3)  | C 6- O46 | 852. | RY*(9)  | C153     | 0.09 | 2.79   | 0.014 |
| 18.                   | BD | (3)  | C 6- O46 | 853. | RY*(10) | C153     | 0.23 | 5.65   | 0.032 |
| 18.                   | BD | (3)  | C 6- O46 | 861. | RY*(18) | C153     | 0.06 | 17.07  | 0.028 |
| 19.                   | BD | (1)  | C 6-Ru52 | 845. | RY*(2)  | C153     | 0.28 | 1.47   | 0.019 |
| 19.                   | BD | (1)  | C 6-Ru52 | 846. | RY*(3)  | C153     | 1.42 | 6.57   | 0.088 |
| 19.                   | BD | (1)  | C 6-Ru52 | 847. | RY*(4)  | C153     | 0.66 | 2.94   | 0.040 |
| 19.                   | BD | (1)  | C 6-Ru52 | 848. | RY*(5)  | C153     | 1.04 | 7.04   | 0.078 |
| 19.                   | BD | (1)  | C 6-Ru52 | 849. | RY*(6)  | C153     | 0.54 | 1.81   | 0.029 |
| 19.                   | BD | (1)  | C 6-Ru52 | 850. | RY*(7)  | C153     | 0.54 | 4.21   | 0.043 |
| 19.                   | BD | (1)  | C 6-Ru52 | 858. | RY*(15) | C153     | 0.15 | 170.73 | 0.147 |
| 19.                   | BD | (1)  | C 6-Ru52 | 860. | RY*(17) | C153     | 0.19 | 49.51  | 0.089 |
| 19.                   | BD | (1)  | C 6-Ru52 | 861. | RY*(18) | C153     | 0.12 | 16.52  | 0.040 |
| 23.                   | BD | (1)  | C 8- O47 | 847. | RY*(4)  | C153     | 0.06 | 2.79   | 0.011 |
| 25.                   | BD | (3)  | C 8- O47 | 846. | RY*(3)  | C153     | 0.21 | 7.14   | 0.034 |
| 25.                   | BD | (3)  | C 8- O47 | 847. | RY*(4)  | C153     | 0.87 | 3.50   | 0.049 |
| 25.                   | BD | (3)  | C 8- O47 | 848. | RY*(5)  | C153     | 0.21 | 7.60   | 0.036 |
| 25.                   | BD | (3)  | C 8- O47 | 850. | RY*(7)  | C153     | 0.08 | 4.77   | 0.017 |
| 25.                   | BD | (3)  | C 8- O47 | 852. | RY*(9)  | C153     | 0.10 | 2.80   | 0.015 |
| 25.                   | BD | (3)  | C 8- O47 | 853. | RY*(10) | C153     | 0.24 | 5.66   | 0.033 |
| 25.                   | BD | (3)  | C 8- O47 | 856. | RY*(13) | C153     | 0.20 | 6.44   | 0.032 |
| 25.                   | BD | (3)  | C 8- O47 | 861. | RY*(18) | C153     | 0.07 | 17.08  | 0.031 |
| 26.                   | BD | (1)  | C 8-Ru52 | 846. | RY*(3)  | C153     | 0.27 | 6.58   | 0.038 |
| 26.                   | BD | (1)  | C 8-Ru52 | 847. | RY*(4)  | C153     | 0.50 | 2.94   | 0.035 |
| 26.                   | BD | (1)  | C 8-Ru52 | 848. | RY*(5)  | C153     | 0.25 | 7.04   | 0.038 |
| 26.                   | BD | (1)  | C 8-Ru52 | 850. | RY*(7)  | C153     | 0.06 | 4.21   | 0.015 |
| 26.                   | BD | (1)  | C 8-Ru52 | 852. | RY*(9)  | C153     | 0.07 | 2.24   | 0.012 |
| 26.                   | BD | (1)  | C 8-Ru52 | 853. | RY*(10) | C153     | 0.25 | 5.10   | 0.032 |
| 26.                   | BD | (1)  | C 8-Ru52 | 856. | RY*(13) | C153     | 0.11 | 5.88   | 0.023 |
| 26.                   | BD | (1)  | C 8-Ru52 | 860. | RY*(17) | C153     | 0.07 | 49.52  | 0.055 |
| 26.                   | BD | (1)  | C 8-Ru52 | 861. | RY*(18) | C153     | 0.13 | 16.52  | 0.043 |
| 37.                   | BD | (1)  | C12- C14 | 847. | RY*(4)  | C153     | 0.06 | 3.07   | 0.012 |
| 39.                   | BD | (1)  | C12- H29 | 847. | RY*(4)  | C153     | 0.17 | 2.90   | 0.020 |
| 39.                   | BD | (1)  | C12- H29 | 848. | RY*(5)  | C153     | 0.08 | 7.00   | 0.022 |
| 40.                   | BD | (1)  | C12- N50 | 847. | RY*(4)  | C153     | 0.24 | 3.19   | 0.025 |
| 40.                   | BD | (1)  | C12- N50 | 852. | RY*(9)  | C153     | 0.08 | 2.49   | 0.012 |
| 47.                   | BD | (1)  | C16- C18 | 846. | RY*(3)  | C153     | 0.17 | 6.66   | 0.030 |
| 47.                   | BD | (1)  | C16- C18 | 848. | RY*(5)  | C153     | 0.21 | 7.12   | 0.034 |
| 48.                   | BD | (1)  | C16- C22 | 846. | RY*(3)  | C153     | 0.13 | 6.65   | 0.027 |
| 48.                   | BD | (1)  | C16- C22 | 848. | RY*(5)  | C153     | 0.06 | 7.11   | 0.018 |
| 49.                   | BD | (1)  | C16-Ru52 | 845. | RY*(2)  | C153     | 0.54 | 1.30   | 0.025 |
| 49.                   | BD | (1)  | C16-Ru52 | 846. | RY*(3)  | C153     | 1.24 | 6.41   | 0.083 |
| 49.                   | BD | (1)  | C16-Ru52 | 847. | RY*(4)  | C153     | 1.02 | 2.77   | 0.049 |
| 49.                   | BD | (1)  | C16-Ru52 | 848. | RY*(5)  | C153     | 1.10 | 6.87   | 0.081 |
| 49.                   | BD | (1)  | C16-Ru52 | 849. | RY*(6)  | C153     | 0.24 | 1.65   | 0.019 |
| 49.                   | BD | (1)  | C16-Ru52 | 850. | RY*(7)  | C153     | 0.10 | 4.04   | 0.018 |
| 49.                   | BD | (1)  | C16-Ru52 | 853. | RY*(10) | C153     | 0.06 | 4.93   | 0.016 |
| 49.                   | BD | (1)  | C16-Ru52 | 858. | RY*(15) | C153     | 0.06 | 170.56 | 0.091 |
| 49.                   | BD | (1)  | C16-Ru52 | 860. | RY*(17) | C153     | 0.06 | 49.35  | 0.052 |
| 59.                   | BD | (1)  | C20- N50 | 846. | RY*(3)  | C153     | 0.20 | 6.80   | 0.033 |
| 59.                   | BD | (1)  | C20- N50 | 848. | RY*(5)  | C153     | 0.10 | 7.26   | 0.024 |
| 60.                   | BD | (2)  | C20- N50 | 850. | RY*(7)  | C153     | 0.18 | 3.97   | 0.026 |
| 60.                   | BD | (2)  | C20- N50 | 852. | RY*(9)  | C153     | 0.09 | 2.00   | 0.013 |
| 60.                   | BD | (2)  | C20- N50 | 853. | RY*(10) | C153     | 0.23 | 4.86   | 0.032 |
| 60.                   | BD | (2)  | C20- N50 | 858. | RY*(15) | C153     | 0.07 | 170.50 | 0.108 |
| 60.                   | BD | (2)  | C20- N50 | 860. | RY*(17) | C153     | 0.10 | 49.28  | 0.069 |

|                       |    |     |      |     |      |             |           |         |       |
|-----------------------|----|-----|------|-----|------|-------------|-----------|---------|-------|
| 60.                   | BD | (2) | C20- | N50 | 861. | RY*(18)C153 | 0.12      | 16.28   | 0.042 |
| 126.                  | CR | (3) | Ru52 |     | 846. | RY*(3)C153  | 0.18      | 27.93   | 0.063 |
| 126.                  | CR | (3) | Ru52 |     | 847. | RY*(4)C153  | 0.12      | 24.30   | 0.048 |
| 126.                  | CR | (3) | Ru52 |     | 848. | RY*(5)C153  | 0.21      | 28.40   | 0.068 |
| 126.                  | CR | (3) | Ru52 |     | 853. | RY*(10)C153 | 0.06      | 26.46   | 0.037 |
| 156.                  | LP | (1) | N50  |     | 846. | RY*(3)C153  | 0.31      | 6.42    | 0.044 |
| 156.                  | LP | (1) | N50  |     | 848. | RY*(5)C153  | 0.25      | 6.88    | 0.040 |
| 156.                  | LP | (1) | N50  |     | 853. | RY*(10)C153 | 0.12      | 4.94    | 0.023 |
| 160.                  | LP | (1) | Ru52 |     | 846. | RY*(3)C153  | 0.23      | 6.24    | 0.036 |
| 160.                  | LP | (1) | Ru52 |     | 847. | RY*(4)C153  | 0.08      | 2.61    | 0.014 |
| 160.                  | LP | (1) | Ru52 |     | 848. | RY*(5)C153  | 0.25      | 6.71    | 0.039 |
| 160.                  | LP | (1) | Ru52 |     | 856. | RY*(13)C153 | 0.09      | 5.55    | 0.021 |
| 161.                  | LP | (2) | Ru52 |     | 845. | RY*(2)C153  | 0.30      | 1.14    | 0.018 |
| 161.                  | LP | (2) | Ru52 |     | 846. | RY*(3)C153  | 0.08      | 6.25    | 0.022 |
| 161.                  | LP | (2) | Ru52 |     | 847. | RY*(4)C153  | 0.25      | 2.61    | 0.025 |
| 161.                  | LP | (2) | Ru52 |     | 848. | RY*(5)C153  | 0.08      | 6.71    | 0.023 |
| 161.                  | LP | (2) | Ru52 |     | 850. | RY*(7)C153  | 0.10      | 3.88    | 0.019 |
| 161.                  | LP | (2) | Ru52 |     | 851. | RY*(8)C153  | 0.21      | 1.34    | 0.016 |
| 161.                  | LP | (2) | Ru52 |     | 852. | RY*(9)C153  | 0.32      | 1.91    | 0.024 |
| 161.                  | LP | (2) | Ru52 |     | 853. | RY*(10)C153 | 0.52      | 4.77    | 0.048 |
| 161.                  | LP | (2) | Ru52 |     | 855. | RY*(12)C153 | 0.06      | 5.48    | 0.018 |
| 161.                  | LP | (2) | Ru52 |     | 856. | RY*(13)C153 | 0.12      | 5.55    | 0.025 |
| 161.                  | LP | (2) | Ru52 |     | 858. | RY*(15)C153 | 0.09      | 170.40  | 0.120 |
| 161.                  | LP | (2) | Ru52 |     | 860. | RY*(17)C153 | 0.14      | 49.19   | 0.079 |
| 161.                  | LP | (2) | Ru52 |     | 861. | RY*(18)C153 | 0.15      | 16.19   | 0.047 |
| 162.                  | LP | (3) | Ru52 |     | 844. | RY*(1)C153  | 0.45      | 0.86    | 0.019 |
| 162.                  | LP | (3) | Ru52 |     | 852. | RY*(9)C153  | 0.05      | 1.92    | 0.010 |
| from unit 3 to unit 1 |    |     |      |     |      |             |           |         |       |
| 72.                   | BD | (1) | H43- | O45 | 176. | RY*(9)C1    | 0.09      | 3.83    | 0.016 |
| 72.                   | BD | (1) | H43- | O45 | 185. | RY*(3)C2    | 0.14      | 2.42    | 0.016 |
| 72.                   | BD | (1) | H43- | O45 | 187. | RY*(5)C2    | 0.07      | 2.56    | 0.012 |
| 72.                   | BD | (1) | H43- | O45 | 188. | RY*(6)C2    | 0.56      | 4.29    | 0.044 |
| 72.                   | BD | (1) | H43- | O45 | 189. | RY*(7)C2    | 0.17      | 5.49    | 0.027 |
| 72.                   | BD | (1) | H43- | O45 | 190. | RY*(8)C2    | 0.10      | 9.41    | 0.027 |
| 72.                   | BD | (1) | H43- | O45 | 207. | RY*(10)C3   | 0.06      | 9.25    | 0.020 |
| 72.                   | BD | (1) | H43- | O45 | 213. | RY*(1)C4    | 0.93      | 2.89    | 0.046 |
| 72.                   | BD | (1) | H43- | O45 | 214. | RY*(2)C4    | 0.12      | 2.11    | 0.014 |
| 72.                   | BD | (1) | H43- | O45 | 215. | RY*(3)C4    | 0.08      | 2.23    | 0.012 |
| 72.                   | BD | (1) | H43- | O45 | 216. | RY*(4)C4    | 0.16      | 2.42    | 0.018 |
| 72.                   | BD | (1) | H43- | O45 | 219. | RY*(7)C4    | 0.91      | 7.26    | 0.073 |
| 72.                   | BD | (1) | H43- | O45 | 223. | RY*(11)C4   | 0.06      | 3.72    | 0.013 |
| 72.                   | BD | (1) | H43- | O45 | 224. | RY*(12)C4   | 0.13      | 4.00    | 0.020 |
| 72.                   | BD | (1) | H43- | O45 | 225. | RY*(13)C4   | 0.07      | 3.19    | 0.013 |
| 72.                   | BD | (1) | H43- | O45 | 258. | RY*(1)C7    | 0.06      | 2.19    | 0.010 |
| 72.                   | BD | (1) | H43- | O45 | 260. | RY*(3)C7    | 0.07      | 2.61    | 0.012 |
| 72.                   | BD | (1) | H43- | O45 | 264. | RY*(7)C7    | 0.18      | 4.67    | 0.026 |
| 72.                   | BD | (1) | H43- | O45 | 290. | RY*(3)C9    | 0.13      | 2.44    | 0.016 |
| 72.                   | BD | (1) | H43- | O45 | 291. | RY*(4)C9    | 0.06      | 1.80    | 0.009 |
| 72.                   | BD | (1) | H43- | O45 | 292. | RY*(5)C9    | 0.06      | 2.59    | 0.011 |
| 72.                   | BD | (1) | H43- | O45 | 293. | RY*(6)C9    | 0.34      | 4.52    | 0.035 |
| 72.                   | BD | (1) | H43- | O45 | 296. | RY*(9)C9    | 0.06      | 14.37   | 0.027 |
| 72.                   | BD | (1) | H43- | O45 | 297. | RY*(10)C9   | 0.06      | 4.67    | 0.015 |
| 72.                   | BD | (1) | H43- | O45 | 303. | RY*(1)C10   | 0.48      | 2.71    | 0.032 |
| 72.                   | BD | (1) | H43- | O45 | 306. | RY*(4)C10   | 0.11      | 2.42    | 0.015 |
| 72.                   | BD | (1) | H43- | O45 | 309. | RY*(7)C10   | 0.16      | 7.31    | 0.031 |
| 72.                   | BD | (1) | H43- | O45 | 310. | RY*(8)C10   | 0.16      | 4.62    | 0.024 |
| 72.                   | BD | (1) | H43- | O45 | 314. | RY*(12)C10  | 0.05      | 3.38    | 0.012 |
| 72.                   | BD | (1) | H43- | O45 | 315. | RY*(13)C10  | 0.07      | 3.43    | 0.014 |
| 72.                   | BD | (1) | H43- | O45 | 318. | RY*(1)C11   | 0.10      | 1.87    | 0.012 |
| 72.                   | BD | (1) | H43- | O45 | 319. | RY*(2)C11   | 0.08      | 1.38    | 0.009 |
| 72.                   | BD | (1) | H43- | O45 | 321. | RY*(4)C11   | 0.35      | 2.90    | 0.029 |
| 72.                   | BD | (1) | H43- | O45 | 323. | RY*(6)C11   | 0.06      | 3.05    | 0.012 |
| 72.                   | BD | (1) | H43- | O45 | 325. | RY*(8)C11   | 0.11      | 5.27    | 0.022 |
| 72.                   | BD | (1) | H43- | O45 | 326. | RY*(9)C11   | 0.20      | 14.62   | 0.048 |
| 72.                   | BD | (1) | H43- | O45 | 329. | RY*(12)C11  | 0.13      | 3.78    | 0.020 |
| 72.                   | BD | (1) | H43- | O45 | 330. | RY*(13)C11  | 0.17      | 4.12    | 0.024 |
| 72.                   | BD | (1) | H43- | O45 | 332. | RY*(15)C11  | 0.08      | 27.17   | 0.041 |
| 72.                   | BD | (1) | H43- | O45 | 379. | RY*(2)C15   | 0.07      | 1.14    | 0.008 |
| 72.                   | BD | (1) | H43- | O45 | 380. | RY*(3)C15   | 0.11      | 2.39    | 0.015 |
| 72.                   | BD | (1) | H43- | O45 | 383. | RY*(6)C15   | 0.58      | 4.10    | 0.044 |
| 72.                   | BD | (1) | H43- | O45 | 384. | RY*(7)C15   | 0.12      | 8.82    | 0.029 |
| 72.                   | BD | (1) | H43- | O45 | 558. | RY*(1)H27   | 0.14      | 2.00    | 0.015 |
| 72.                   | BD | (1) | H43- | O45 | 559. | RY*(2)H27   | 0.08      | 2.62    | 0.013 |
| 72.                   | BD | (1) | H43- | O45 | 560. | RY*(3)H27   | 0.17      | 1.60    | 0.015 |
| 72.                   | BD | (1) | H43- | O45 | 561. | RY*(4)H27   | 0.26      | 2.43    | 0.023 |
| 72.                   | BD | (1) | H43- | O45 | 565. | RY*(3)H28   | 0.07      | 2.30    | 0.012 |
| 72.                   | BD | (1) | H43- | O45 | 592. | RY*(5)H33   | 0.06      | 4.76    | 0.015 |
| 72.                   | BD | (1) | H43- | O45 | 595. | RY*(3)H34   | 0.13      | 2.07    | 0.015 |
| 72.                   | BD | (1) | H43- | O45 | 630. | RY*(3)H41   | 0.13      | 1.86    | 0.014 |
| 72.                   | BD | (1) | H43- | O45 | 645. | RY*(3)O44   | 0.10      | 2.40    | 0.014 |
| 72.                   | BD | (1) | H43- | O45 | 646. | RY*(4)O44   | 0.47      | 1.36    | 0.022 |
| 72.                   | BD | (1) | H43- | O45 | 647. | RY*(5)O44   | 0.25      | 3.04    | 0.024 |
| 72.                   | BD | (1) | H43- | O45 | 648. | RY*(6)O44   | 0.10      | 3.50    | 0.017 |
| 72.                   | BD | (1) | H43- | O45 | 705. | RY*(3)O48   | 0.12      | 2.63    | 0.016 |
| 72.                   | BD | (1) | H43- | O45 | 706. | RY*(4)O48   | 0.36      | 1.35    | 0.020 |
| 72.                   | BD | (1) | H43- | O45 | 707. | RY*(5)O48   | 0.13      | 2.73    | 0.017 |
| 72.                   | BD | (1) | H43- | O45 | 708. | RY*(6)O48   | 0.12      | 2.53    | 0.015 |
| 72.                   | BD | (1) | H43- | O45 | 718. | RY*(1)N49   | 0.22      | 2.55    | 0.021 |
| 72.                   | BD | (1) | H43- | O45 | 720. | RY*(3)N49   | 0.08      | 2.75    | 0.013 |
| 72.                   | BD | (1) | H43- | O45 | 726. | RY*(9)N49   | 0.08      | 5.14    | 0.018 |
| 72.                   | BD | (1) | H43- | O45 | 748. | RY*(1)Ru51  | 2.78      | 18.69   | 0.204 |
| 72.                   | BD | (1) | H43- | O45 | 749. | RY*(2)Ru51  | 0.92      | 1.53    | 0.033 |
| 72.                   | BD | (1) | H43- | O45 | 750. | RY*(3)Ru51  | 1.66      | 8.89    | 0.109 |
| 72.                   | BD | (1) | H43- | O45 | 751. | RY*(4)Ru51  | 0.26      | 1.89    | 0.020 |
| 72.                   | BD | (1) | H43- | O45 | 752. | RY*(5)Ru51  | 1.25      | 4.80    | 0.069 |
| 72.                   | BD | (1) | H43- | O45 | 755. | RY*(8)Ru51  | 2.24      | 6.77    | 0.110 |
| 72.                   | BD | (1) | H43- | O45 | 756. | RY*(9)Ru51  | 0.36      | 3.24    | 0.030 |
| 72.                   | BD | (1) | H43- | O45 | 757. | RY*(10)Ru51 | 2.77      | 21.88   | 0.220 |
| 72.                   | BD | (1) | H43- | O45 | 759. | RY*(12)Ru51 | 1.45      | 15.37   | 0.134 |
| 72.                   | BD | (1) | H43- | O45 | 760. | RY*(13)Ru51 | 1.31      | 5.41    | 0.075 |
| 72.                   | BD | (1) | H43- | O45 | 761. | RY*(14)Ru51 | 0.52      | 8.17    | 0.058 |
| 72.                   | BD | (1) | H43- | O45 | 762. | RY*(15)Ru51 | 1.09      | 14.86   | 0.114 |
| 72.                   | BD | (1) | H43- | O45 | 763. | RY*(16)Ru51 | 1.23      | 13.43   | 0.115 |
| 72.                   | BD | (1) | H43- | O45 | 764. | RY*(17)Ru51 | 1.95      | 11.17   | 0.132 |
| 72.                   | BD | (1) | H43- | O45 | 765. | RY*(18)Ru51 | 0.54      | 7.34    | 0.056 |
| 72.                   | BD | (1) | H43- | O45 | 766. | RY*(19)Ru51 | 0.31      | 7.48    | 0.043 |
| 72.                   | BD | (1) | H43- | O45 | 767. | RY*(20)Ru51 | 2.62      | 17.84   | 0.194 |
| 72.                   | BD | (1) | H43- | O45 | 768. | RY*(21)Ru51 | 0.37      | 17.49   | 0.072 |
| 72.                   | BD | (1) | H43- | O45 | 770. | RY*(23)Ru51 | 1.37      | 16.79   | 0.136 |
| 72.                   | BD | (1) | H43- | O45 | 772. | RY*(25)Ru51 | 1.38      | 9406.68 | 3.220 |
| 72.                   | BD | (1) | H43- | O45 | 773. | RY*(26)Ru51 | 0.8037514 | 24      | 4.887 |
| 72.                   | BD | (1) | H43- | O45 | 774. | RY*(27)Ru51 | 0.07      | 49.85   | 0.052 |
| 72.                   | BD | (1) | H43- | O45 | 776. | RY*(29)Ru51 | 2.60      | 78.06   | 0.403 |
| 72.                   | BD | (1) | H43- | O45 | 777. | RY*(30)Ru51 | 2.13      | 26.35   | 0.212 |
| 72.                   | BD | (1) | H43- | O45 | 780. | RY*(33)Ru51 | 2.42      | 324.96  | 0.793 |

|      |    |      |      |     |      |         |           |              |         |       |
|------|----|------|------|-----|------|---------|-----------|--------------|---------|-------|
| 72.  | BD | ( 1) | H43- | O45 | 781. | RY*(34) | Ru51      | 0.07         | 50.82   | 0.052 |
| 72.  | BD | ( 1) | H43- | O45 | 785. | RY*(38) | Ru51      | 1.89         | 596.80  | 0.950 |
| 72.  | BD | ( 1) | H43- | O45 | 788. | RY*(41) | Ru51      | 0.48         | 89.57   | 0.186 |
| 72.  | BD | ( 1) | H43- | O45 | 789. | RY*(42) | Ru51      | 1.31         | 533.40  | 0.748 |
| 72.  | BD | ( 1) | H43- | O45 | 902. | BD*( 1) | C11-Ru51  | 5.96         | 0.66    | 0.060 |
| 72.  | BD | ( 1) | H43- | O45 | 911. | BD*( 3) | C 4- O44  | 0.07         | 1.23    | 0.009 |
| 72.  | BD | ( 1) | H43- | O45 | 916. | BD*( 3) | C10- O48  | 0.07         | 1.23    | 0.008 |
| 100. | CR | ( 1) | O45  |     | 750. | RY*( 3) | Ru51      | 0.05         | 26.86   | 0.034 |
| 100. | CR | ( 1) | O45  |     | 751. | RY*( 4) | Ru51      | 0.06         | 19.85   | 0.030 |
| 100. | CR | ( 1) | O45  |     | 902. | BD*( 1) | C11-Ru51  | 3.16         | 18.62   | 0.234 |
| 149. | LP | ( 1) | O45  |     | 185. | RY*( 3) | C 2       | 0.10         | 2.20    | 0.014 |
| 149. | LP | ( 1) | O45  |     | 188. | RY*( 6) | C 2       | 0.06         | 4.07    | 0.014 |
| 149. | LP | ( 1) | O45  |     | 213. | RY*( 1) | C 4       | 0.13         | 2.67    | 0.016 |
| 149. | LP | ( 1) | O45  |     | 219. | RY*( 7) | C 4       | 0.19         | 7.04    | 0.033 |
| 149. | LP | ( 1) | O45  |     | 303. | RY*( 1) | C10       | 0.16         | 2.49    | 0.018 |
| 149. | LP | ( 1) | O45  |     | 309. | RY*( 7) | C10       | 0.06         | 7.09    | 0.019 |
| 149. | LP | ( 1) | O45  |     | 311. | RY*( 9) | C10       | 0.06         | 4.32    | 0.015 |
| 149. | LP | ( 1) | O45  |     | 318. | RY*( 1) | C11       | 0.11         | 1.65    | 0.012 |
| 149. | LP | ( 1) | O45  |     | 319. | RY*( 2) | C11       | 0.07         | 1.16    | 0.008 |
| 149. | LP | ( 1) | O45  |     | 383. | RY*( 6) | C15       | 0.15         | 3.88    | 0.022 |
| 149. | LP | ( 1) | O45  |     | 558. | RY*( 1) | H27       | 0.12         | 1.78    | 0.013 |
| 149. | LP | ( 1) | O45  |     | 559. | RY*( 2) | H27       | 0.06         | 2.39    | 0.010 |
| 149. | LP | ( 1) | O45  |     | 560. | RY*( 3) | H27       | 0.06         | 1.37    | 0.008 |
| 149. | LP | ( 1) | O45  |     | 646. | RY*( 4) | O44       | 0.12         | 1.13    | 0.010 |
| 149. | LP | ( 1) | O45  |     | 647. | RY*( 5) | O44       | 0.06         | 2.82    | 0.012 |
| 149. | LP | ( 1) | O45  |     | 706. | RY*( 4) | O48       | 0.12         | 1.13    | 0.011 |
| 149. | LP | ( 1) | O45  |     | 721. | RY*( 4) | N49       | 0.06         | 4.96    | 0.015 |
| 149. | LP | ( 1) | O45  |     | 726. | RY*( 9) | N49       | 0.06         | 4.92    | 0.015 |
| 149. | LP | ( 1) | O45  |     | 748. | RY*( 1) | Ru51      | 0.46         | 18.47   | 0.082 |
| 149. | LP | ( 1) | O45  |     | 750. | RY*( 3) | Ru51      | 0.51         | 8.67    | 0.060 |
| 149. | LP | ( 1) | O45  |     | 751. | RY*( 4) | Ru51      | 0.07         | 1.67    | 0.009 |
| 149. | LP | ( 1) | O45  |     | 752. | RY*( 5) | Ru51      | 0.11         | 4.57    | 0.020 |
| 149. | LP | ( 1) | O45  |     | 755. | RY*( 8) | Ru51      | 0.63         | 6.55    | 0.058 |
| 149. | LP | ( 1) | O45  |     | 757. | RY*(10) | Ru51      | 0.88         | 21.66   | 0.124 |
| 149. | LP | ( 1) | O45  |     | 759. | RY*(12) | Ru51      | 0.43         | 15.15   | 0.073 |
| 149. | LP | ( 1) | O45  |     | 760. | RY*(13) | Ru51      | 0.60         | 5.19    | 0.050 |
| 149. | LP | ( 1) | O45  |     | 761. | RY*(14) | Ru51      | 0.76         | 7.94    | 0.070 |
| 149. | LP | ( 1) | O45  |     | 762. | RY*(15) | Ru51      | 0.05         | 14.63   | 0.025 |
| 149. | LP | ( 1) | O45  |     | 763. | RY*(16) | Ru51      | 0.22         | 13.21   | 0.049 |
| 149. | LP | ( 1) | O45  |     | 764. | RY*(17) | Ru51      | 0.24         | 10.95   | 0.046 |
| 149. | LP | ( 1) | O45  |     | 765. | RY*(18) | Ru51      | 0.17         | 7.11    | 0.031 |
| 149. | LP | ( 1) | O45  |     | 766. | RY*(19) | Ru51      | 0.07         | 7.26    | 0.020 |
| 149. | LP | ( 1) | O45  |     | 767. | RY*(20) | Ru51      | 0.61         | 17.62   | 0.093 |
| 149. | LP | ( 1) | O45  |     | 768. | RY*(21) | Ru51      | 0.14         | 17.27   | 0.045 |
| 149. | LP | ( 1) | O45  |     | 770. | RY*(23) | Ru51      | 0.17         | 16.57   | 0.048 |
| 149. | LP | ( 1) | O45  |     | 772. | RY*(25) | Ru51      | 0.26         | 9406.46 | 1.399 |
| 149. | LP | ( 1) | O45  |     | 773. | RY*(26) | Ru51      | 0.1537514.02 |         | 2.152 |
| 149. | LP | ( 1) | O45  |     | 776. | RY*(29) | Ru51      | 0.56         | 77.84   | 0.188 |
| 149. | LP | ( 1) | O45  |     | 777. | RY*(30) | Ru51      | 0.45         | 26.13   | 0.098 |
| 149. | LP | ( 1) | O45  |     | 780. | RY*(33) | Ru51      | 0.48         | 324.74  | 0.356 |
| 149. | LP | ( 1) | O45  |     | 785. | RY*(38) | Ru51      | 0.36         | 596.58  | 0.417 |
| 149. | LP | ( 1) | O45  |     | 786. | RY*(39) | Ru51      | 0.19         | 18.29   | 0.053 |
| 149. | LP | ( 1) | O45  |     | 787. | RY*(40) | Ru51      | 0.10         | 54.30   | 0.065 |
| 149. | LP | ( 1) | O45  |     | 788. | RY*(41) | Ru51      | 0.09         | 89.35   | 0.082 |
| 149. | LP | ( 1) | O45  |     | 789. | RY*(42) | Ru51      | 0.24         | 533.18  | 0.320 |
| 149. | LP | ( 1) | O45  |     | 790. | RY*(43) | Ru51      | 0.08         | 18.64   | 0.035 |
| 149. | LP | ( 1) | O45  |     | 792. | RY*(45) | Ru51      | 0.05         | 51.37   | 0.046 |
| 149. | LP | ( 1) | O45  |     | 887. | BD*( 1) | C 1- C 2  | 0.37         | 0.88    | 0.016 |
| 149. | LP | ( 1) | O45  |     | 891. | BD*( 1) | C 2- H27  | 1.60         | 0.79    | 0.032 |
| 149. | LP | ( 1) | O45  |     | 892. | BD*( 1) | C 7- N49  | 0.36         | 0.83    | 0.015 |
| 149. | LP | ( 1) | O45  |     | 902. | BD*( 1) | C11-Ru51  | 8.09         | 0.43    | 0.057 |
| 149. | LP | ( 1) | O45  |     | 911. | BD*( 3) | C 4- O44  | 0.05         | 1.00    | 0.006 |
| 149. | LP | ( 1) | O45  |     | 912. | BD*( 1) | C 4- Ru51 | 0.09         | 0.48    | 0.006 |
| 149. | LP | ( 1) | O45  |     | 913. | BD*( 1) | C10-Ru51  | 0.90         | 0.52    | 0.021 |
| 150. | LP | ( 2) | O45  |     | 219. | RY*( 7) | C 4       | 0.08         | 7.16    | 0.023 |
| 150. | LP | ( 2) | O45  |     | 321. | RY*( 4) | C11       | 0.08         | 2.80    | 0.014 |
| 150. | LP | ( 2) | O45  |     | 326. | RY*( 9) | C11       | 0.09         | 14.52   | 0.033 |
| 150. | LP | ( 2) | O45  |     | 332. | RY*(15) | C11       | 0.06         | 27.07   | 0.038 |
| 150. | LP | ( 2) | O45  |     | 383. | RY*( 6) | C15       | 0.08         | 4.00    | 0.017 |
| 150. | LP | ( 2) | O45  |     | 560. | RY*( 3) | H27       | 0.11         | 1.50    | 0.012 |
| 150. | LP | ( 2) | O45  |     | 646. | RY*( 4) | O44       | 0.06         | 1.26    | 0.008 |
| 150. | LP | ( 2) | O45  |     | 706. | RY*( 4) | O48       | 0.05         | 1.25    | 0.008 |
| 150. | LP | ( 2) | O45  |     | 748. | RY*( 1) | Ru51      | 0.24         | 18.59   | 0.062 |
| 150. | LP | ( 2) | O45  |     | 749. | RY*( 2) | Ru51      | 0.07         | 1.43    | 0.009 |
| 150. | LP | ( 2) | O45  |     | 750. | RY*( 3) | Ru51      | 0.61         | 8.79    | 0.068 |
| 150. | LP | ( 2) | O45  |     | 752. | RY*( 5) | Ru51      | 0.11         | 4.70    | 0.022 |
| 150. | LP | ( 2) | O45  |     | 753. | RY*( 6) | Ru51      | 0.10         | 3.64    | 0.017 |
| 150. | LP | ( 2) | O45  |     | 755. | RY*( 8) | Ru51      | 0.22         | 6.67    | 0.036 |
| 150. | LP | ( 2) | O45  |     | 756. | RY*( 9) | Ru51      | 0.18         | 3.14    | 0.023 |
| 150. | LP | ( 2) | O45  |     | 757. | RY*(10) | Ru51      | 0.36         | 21.78   | 0.083 |
| 150. | LP | ( 2) | O45  |     | 758. | RY*(11) | Ru51      | 0.07         | 7.37    | 0.021 |
| 150. | LP | ( 2) | O45  |     | 759. | RY*(12) | Ru51      | 0.22         | 15.27   | 0.055 |
| 150. | LP | ( 2) | O45  |     | 760. | RY*(13) | Ru51      | 0.08         | 5.31    | 0.019 |
| 150. | LP | ( 2) | O45  |     | 761. | RY*(14) | Ru51      | 0.25         | 8.07    | 0.042 |
| 150. | LP | ( 2) | O45  |     | 763. | RY*(16) | Ru51      | 0.38         | 13.33   | 0.067 |
| 150. | LP | ( 2) | O45  |     | 764. | RY*(17) | Ru51      | 0.34         | 11.07   | 0.058 |
| 150. | LP | ( 2) | O45  |     | 766. | RY*(19) | Ru51      | 0.05         | 7.38    | 0.019 |
| 150. | LP | ( 2) | O45  |     | 767. | RY*(20) | Ru51      | 0.35         | 17.74   | 0.074 |
| 150. | LP | ( 2) | O45  |     | 768. | RY*(21) | Ru51      | 0.24         | 17.39   | 0.060 |
| 150. | LP | ( 2) | O45  |     | 770. | RY*(23) | Ru51      | 0.10         | 16.69   | 0.038 |
| 150. | LP | ( 2) | O45  |     | 772. | RY*(25) | Ru51      | 0.12         | 9406.58 | 0.997 |
| 150. | LP | ( 2) | O45  |     | 773. | RY*(26) | Ru51      | 0.0837514.14 |         | 1.612 |
| 150. | LP | ( 2) | O45  |     | 776. | RY*(29) | Ru51      | 0.30         | 77.96   | 0.144 |
| 150. | LP | ( 2) | O45  |     | 777. | RY*(30) | Ru51      | 0.30         | 26.25   | 0.083 |
| 150. | LP | ( 2) | O45  |     | 778. | RY*(31) | Ru51      | 0.11         | 19.17   | 0.043 |
| 150. | LP | ( 2) | O45  |     | 780. | RY*(33) | Ru51      | 0.26         | 324.86  | 0.275 |
| 150. | LP | ( 2) | O45  |     | 785. | RY*(38) | Ru51      | 0.18         | 596.70  | 0.308 |
| 150. | LP | ( 2) | O45  |     | 788. | RY*(41) | Ru51      | 0.05         | 89.47   | 0.063 |
| 150. | LP | ( 2) | O45  |     | 789. | RY*(42) | Ru51      | 0.11         | 533.30  | 0.226 |
| 150. | LP | ( 2) | O45  |     | 794. | RY*(47) | Ru51      | 0.08         | 19.96   | 0.037 |
| 150. | LP | ( 2) | O45  |     | 891. | BD*( 1) | C 2- H27  | 0.10         | 0.91    | 0.009 |
| 150. | LP | ( 2) | O45  |     | 892. | BD*( 1) | C 7- N49  | 0.21         | 0.95    | 0.013 |
| 150. | LP | ( 2) | O45  |     | 900. | BD*( 1) | C11- C15  | 0.05         | 1.04    | 0.007 |
| 150. | LP | ( 2) | O45  |     | 901. | BD*( 2) | C11- C15  | 0.09         | 0.56    | 0.006 |
| 150. | LP | ( 2) | O45  |     | 902. | BD*( 1) | C11-Ru51  | 26.63        | 0.56    | 0.111 |
| 150. | LP | ( 2) | O45  |     | 909. | BD*( 1) | C 4- O44  | 0.22         | 0.52    | 0.010 |
| 150. | LP | ( 2) | O45  |     | 911. | BD*( 3) | C 4- O44  | 0.15         | 1.13    | 0.012 |
| 150. | LP | ( 2) | O45  |     | 912. | BD*( 1) | C 4- Ru51 | 1.24         | 0.61    | 0.025 |
| 150. | LP | ( 2) | O45  |     | 913. | BD*( 1) | C10-Ru51  | 0.21         | 0.65    | 0.011 |
| 150. | LP | ( 2) | O45  |     | 915. | BD*( 2) | C10- O48  | 0.18         | 0.53    | 0.009 |
| 150. | LP | ( 2) | O45  |     | 916. | BD*( 3) | C10- O48  | 0.30         | 1.13    | 0.017 |
| 151. | LP | ( 3) | O45  |     | 185. | RY*( 3) | C 2       | 0.11         | 2.05    | 0.014 |
| 151. | LP | ( 3) | O45  |     | 187. | RY*( 5) | C 2       | 0.05         | 2.19    | 0.010 |
| 151. | LP | ( 3) | O45  |     | 188. | RY*( 6) | C 2       | 0.50         | 3.92    | 0.042 |
| 151. | LP | ( 3) | O45  |     | 189. | RY*( 7) | C 2       | 0.05         | 5.11    | 0.016 |
| 151. | LP | ( 3) | O45  |     | 190. | RY*( 8) | C 2       | 0.06         | 9.04    | 0.023 |

|                       |    |     |          |      |         |           |              |         |       |
|-----------------------|----|-----|----------|------|---------|-----------|--------------|---------|-------|
| 151.                  | LP | (3) | O45      | 192. | RY*(10) | C 2       | 0.06         | 3.54    | 0.014 |
| 151.                  | LP | (3) | O45      | 213. | RY*(1)  | C 4       | 0.21         | 2.52    | 0.022 |
| 151.                  | LP | (3) | O45      | 214. | RY*(2)  | C 4       | 0.07         | 1.74    | 0.010 |
| 151.                  | LP | (3) | O45      | 219. | RY*(7)  | C 4       | 0.34         | 6.89    | 0.046 |
| 151.                  | LP | (3) | O45      | 222. | RY*(10) | C 4       | 0.08         | 1.94    | 0.012 |
| 151.                  | LP | (3) | O45      | 264. | RY*(7)  | C 7       | 0.10         | 4.30    | 0.020 |
| 151.                  | LP | (3) | O45      | 290. | RY*(3)  | C 9       | 0.07         | 2.07    | 0.011 |
| 151.                  | LP | (3) | O45      | 293. | RY*(6)  | C 9       | 0.10         | 4.15    | 0.020 |
| 151.                  | LP | (3) | O45      | 303. | RY*(1)  | C10       | 0.07         | 2.34    | 0.012 |
| 151.                  | LP | (3) | O45      | 309. | RY*(7)  | C10       | 0.07         | 6.94    | 0.020 |
| 151.                  | LP | (3) | O45      | 310. | RY*(8)  | C10       | 0.05         | 4.25    | 0.014 |
| 151.                  | LP | (3) | O45      | 311. | RY*(9)  | C10       | 0.05         | 4.17    | 0.014 |
| 151.                  | LP | (3) | O45      | 313. | RY*(11) | C10       | 0.08         | 2.05    | 0.012 |
| 151.                  | LP | (3) | O45      | 318. | RY*(1)  | C11       | 0.05         | 1.50    | 0.009 |
| 151.                  | LP | (3) | O45      | 321. | RY*(4)  | C11       | 0.13         | 2.53    | 0.017 |
| 151.                  | LP | (3) | O45      | 326. | RY*(9)  | C11       | 0.19         | 14.25   | 0.049 |
| 151.                  | LP | (3) | O45      | 332. | RY*(15) | C11       | 0.10         | 26.80   | 0.050 |
| 151.                  | LP | (3) | O45      | 381. | RY*(4)  | C15       | 0.05         | 1.29    | 0.008 |
| 151.                  | LP | (3) | O45      | 383. | RY*(6)  | C15       | 0.37         | 3.73    | 0.036 |
| 151.                  | LP | (3) | O45      | 384. | RY*(7)  | C15       | 0.07         | 8.45    | 0.022 |
| 151.                  | LP | (3) | O45      | 558. | RY*(1)  | H27       | 0.06         | 1.63    | 0.010 |
| 151.                  | LP | (3) | O45      | 561. | RY*(4)  | H27       | 0.11         | 2.06    | 0.014 |
| 151.                  | LP | (3) | O45      | 595. | RY*(3)  | H34       | 0.07         | 1.69    | 0.010 |
| 151.                  | LP | (3) | O45      | 630. | RY*(3)  | H41       | 0.07         | 1.49    | 0.010 |
| 151.                  | LP | (3) | O45      | 635. | RY*(3)  | H42       | 0.05         | 1.34    | 0.008 |
| 151.                  | LP | (3) | O45      | 646. | RY*(4)  | O44       | 0.30         | 0.98    | 0.016 |
| 151.                  | LP | (3) | O45      | 647. | RY*(5)  | O44       | 0.13         | 2.67    | 0.018 |
| 151.                  | LP | (3) | O45      | 706. | RY*(4)  | O48       | 0.19         | 0.98    | 0.013 |
| 151.                  | LP | (3) | O45      | 707. | RY*(5)  | O48       | 0.05         | 2.36    | 0.011 |
| 151.                  | LP | (3) | O45      | 708. | RY*(6)  | O48       | 0.05         | 2.16    | 0.010 |
| 151.                  | LP | (3) | O45      | 718. | RY*(1)  | N49       | 0.06         | 2.18    | 0.011 |
| 151.                  | LP | (3) | O45      | 726. | RY*(9)  | N49       | 0.07         | 4.77    | 0.017 |
| 151.                  | LP | (3) | O45      | 748. | RY*(1)  | Ru51      | 1.46         | 18.32   | 0.155 |
| 151.                  | LP | (3) | O45      | 750. | RY*(3)  | Ru51      | 0.82         | 8.52    | 0.080 |
| 151.                  | LP | (3) | O45      | 752. | RY*(5)  | Ru51      | 0.28         | 4.42    | 0.033 |
| 151.                  | LP | (3) | O45      | 755. | RY*(8)  | Ru51      | 1.34         | 6.40    | 0.088 |
| 151.                  | LP | (3) | O45      | 756. | RY*(9)  | Ru51      | 0.50         | 2.87    | 0.036 |
| 151.                  | LP | (3) | O45      | 757. | RY*(10) | Ru51      | 1.08         | 21.51   | 0.145 |
| 151.                  | LP | (3) | O45      | 758. | RY*(11) | Ru51      | 0.06         | 7.10    | 0.020 |
| 151.                  | LP | (3) | O45      | 759. | RY*(12) | Ru51      | 0.82         | 15.00   | 0.106 |
| 151.                  | LP | (3) | O45      | 760. | RY*(13) | Ru51      | 0.66         | 5.04    | 0.055 |
| 151.                  | LP | (3) | O45      | 761. | RY*(14) | Ru51      | 0.66         | 7.80    | 0.068 |
| 151.                  | LP | (3) | O45      | 762. | RY*(15) | Ru51      | 0.45         | 14.48   | 0.077 |
| 151.                  | LP | (3) | O45      | 763. | RY*(16) | Ru51      | 0.55         | 13.06   | 0.081 |
| 151.                  | LP | (3) | O45      | 764. | RY*(17) | Ru51      | 0.65         | 10.80   | 0.080 |
| 151.                  | LP | (3) | O45      | 765. | RY*(18) | Ru51      | 0.11         | 6.96    | 0.027 |
| 151.                  | LP | (3) | O45      | 766. | RY*(19) | Ru51      | 0.28         | 7.11    | 0.043 |
| 151.                  | LP | (3) | O45      | 767. | RY*(20) | Ru51      | 1.11         | 17.47   | 0.132 |
| 151.                  | LP | (3) | O45      | 768. | RY*(21) | Ru51      | 0.20         | 17.12   | 0.055 |
| 151.                  | LP | (3) | O45      | 770. | RY*(23) | Ru51      | 0.55         | 16.42   | 0.091 |
| 151.                  | LP | (3) | O45      | 772. | RY*(25) | Ru51      | 0.55         | 9406.31 | 2.175 |
| 151.                  | LP | (3) | O45      | 773. | RY*(26) | Ru51      | 0.3437513.87 |         | 3.412 |
| 151.                  | LP | (3) | O45      | 776. | RY*(29) | Ru51      | 1.31         | 77.69   | 0.303 |
| 151.                  | LP | (3) | O45      | 777. | RY*(30) | Ru51      | 1.16         | 25.98   | 0.165 |
| 151.                  | LP | (3) | O45      | 780. | RY*(33) | Ru51      | 1.08         | 324.59  | 0.563 |
| 151.                  | LP | (3) | O45      | 785. | RY*(38) | Ru51      | 0.81         | 596.43  | 0.661 |
| 151.                  | LP | (3) | O45      | 788. | RY*(41) | Ru51      | 0.22         | 89.20   | 0.135 |
| 151.                  | LP | (3) | O45      | 789. | RY*(42) | Ru51      | 0.54         | 533.03  | 0.510 |
| 151.                  | LP | (3) | O45      | 892. | BD*(1)  | C 7- N49  | 0.26         | 0.68    | 0.012 |
| 151.                  | LP | (3) | O45      | 900. | BD*(1)  | C11- C15  | 0.11         | 0.77    | 0.009 |
| 151.                  | LP | (3) | O45      | 902. | BD*(1)  | C11- Ru51 | 25.53        | 0.28    | 0.077 |
| 151.                  | LP | (3) | O45      | 909. | BD*(1)  | C 4- O44  | 0.48         | 0.25    | 0.010 |
| 151.                  | LP | (3) | O45      | 911. | BD*(3)  | C 4- O44  | 0.53         | 0.86    | 0.020 |
| 151.                  | LP | (3) | O45      | 913. | BD*(1)  | C10- Ru51 | 0.41         | 0.38    | 0.011 |
| 151.                  | LP | (3) | O45      | 914. | BD*(1)  | C10- O48  | 0.36         | 0.25    | 0.009 |
| 151.                  | LP | (3) | O45      | 915. | BD*(2)  | C10- O48  | 0.07         | 0.26    | 0.004 |
| 151.                  | LP | (3) | O45      | 916. | BD*(3)  | C10- O48  | 0.45         | 0.86    | 0.019 |
| from unit 3 to unit 2 |    |     |          |      |         |           |              |         |       |
| 72.                   | BD | (1) | H43- O45 | 243. | RY*(1)  | C 6       | 0.15         | 2.12    | 0.016 |
| 72.                   | BD | (1) | H43- O45 | 277. | RY*(5)  | C 8       | 0.06         | 2.52    | 0.011 |
| 72.                   | BD | (1) | H43- O45 | 338. | RY*(6)  | C12       | 0.05         | 3.41    | 0.012 |
| 72.                   | BD | (1) | H43- O45 | 364. | RY*(2)  | C14       | 0.06         | 1.21    | 0.008 |
| 72.                   | BD | (1) | H43- O45 | 393. | RY*(1)  | C16       | 0.07         | 1.67    | 0.010 |
| 72.                   | BD | (1) | H43- O45 | 404. | RY*(12) | C16       | 0.05         | 3.53    | 0.012 |
| 72.                   | BD | (1) | H43- O45 | 459. | RY*(7)  | C20       | 0.07         | 3.99    | 0.015 |
| 72.                   | BD | (1) | H43- O45 | 483. | RY*(1)  | C22       | 0.06         | 1.96    | 0.010 |
| 72.                   | BD | (1) | H43- O45 | 487. | RY*(5)  | C22       | 0.06         | 4.24    | 0.014 |
| 72.                   | BD | (1) | H43- O45 | 568. | RY*(1)  | H29       | 0.06         | 1.90    | 0.010 |
| 72.                   | BD | (1) | H43- O45 | 570. | RY*(3)  | H29       | 0.46         | 2.05    | 0.028 |
| 72.                   | BD | (1) | H43- O45 | 675. | RY*(3)  | O46       | 0.05         | 2.49    | 0.010 |
| 72.                   | BD | (1) | H43- O45 | 676. | RY*(4)  | O46       | 0.09         | 1.12    | 0.009 |
| 72.                   | BD | (1) | H43- O45 | 699. | RY*(12) | O47       | 0.05         | 1.93    | 0.009 |
| 72.                   | BD | (1) | H43- O45 | 733. | RY*(1)  | N50       | 0.15         | 2.19    | 0.016 |
| 72.                   | BD | (1) | H43- O45 | 735. | RY*(3)  | N50       | 0.15         | 2.76    | 0.018 |
| 72.                   | BD | (1) | H43- O45 | 796. | RY*(1)  | Ru52      | 0.14         | 0.48    | 0.007 |
| 72.                   | BD | (1) | H43- O45 | 797. | RY*(2)  | Ru52      | 3.43         | 1.10    | 0.055 |
| 72.                   | BD | (1) | H43- O45 | 798. | RY*(4)  | Ru52      | 0.95         | 1.33    | 0.032 |
| 72.                   | BD | (1) | H43- O45 | 799. | RY*(4)  | Ru52      | 1.22         | 2.35    | 0.048 |
| 72.                   | BD | (1) | H43- O45 | 800. | RY*(5)  | Ru52      | 0.29         | 3.65    | 0.029 |
| 72.                   | BD | (1) | H43- O45 | 801. | RY*(6)  | Ru52      | 1.05         | 1.75    | 0.038 |
| 72.                   | BD | (1) | H43- O45 | 802. | RY*(7)  | Ru52      | 0.10         | 3.69    | 0.017 |
| 72.                   | BD | (1) | H43- O45 | 803. | RY*(8)  | Ru52      | 0.41         | 1.71    | 0.024 |
| 72.                   | BD | (1) | H43- O45 | 808. | RY*(13) | Ru52      | 0.09         | 3.04    | 0.014 |
| 72.                   | BD | (1) | H43- O45 | 810. | RY*(15) | Ru52      | 0.21         | 6.71    | 0.033 |
| 72.                   | BD | (1) | H43- O45 | 811. | RY*(16) | Ru52      | 0.52         | 6.64    | 0.052 |
| 72.                   | BD | (1) | H43- O45 | 812. | RY*(17) | Ru52      | 0.30         | 4.54    | 0.033 |
| 72.                   | BD | (1) | H43- O45 | 813. | RY*(18) | Ru52      | 0.42         | 6.09    | 0.045 |
| 72.                   | BD | (1) | H43- O45 | 814. | RY*(19) | Ru52      | 0.28         | 5.82    | 0.036 |
| 72.                   | BD | (1) | H43- O45 | 816. | RY*(21) | Ru52      | 0.24         | 13.99   | 0.052 |
| 72.                   | BD | (1) | H43- O45 | 818. | RY*(23) | Ru52      | 1.50         | 7.17    | 0.093 |
| 72.                   | BD | (1) | H43- O45 | 819. | RY*(24) | Ru52      | 0.6129463.97 |         | 3.797 |
| 72.                   | BD | (1) | H43- O45 | 820. | RY*(25) | Ru52      | 1.28         | 765.69  | 0.886 |
| 72.                   | BD | (1) | H43- O45 | 821. | RY*(26) | Ru52      | 1.1712899.96 |         | 3.480 |
| 72.                   | BD | (1) | H43- O45 | 828. | RY*(33) | Ru52      | 0.06         | 155.97  | 0.087 |
| 72.                   | BD | (1) | H43- O45 | 829. | RY*(34) | Ru52      | 0.10         | 50.30   | 0.063 |
| 72.                   | BD | (1) | H43- O45 | 832. | RY*(37) | Ru52      | 0.07         | 186.86  | 0.099 |
| 72.                   | BD | (1) | H43- O45 | 833. | RY*(38) | Ru52      | 1.36         | 3362.05 | 1.911 |
| 72.                   | BD | (1) | H43- O45 | 836. | RY*(41) | Ru52      | 0.81         | 777.33  | 0.711 |
| 72.                   | BD | (1) | H43- O45 | 837. | RY*(42) | Ru52      | 0.49         | 3155.07 | 1.112 |
| 72.                   | BD | (1) | H43- O45 | 863. | BD*(1)  | C12- C14  | 0.08         | 1.09    | 0.008 |
| 72.                   | BD | (1) | H43- O45 | 866. | BD*(1)  | C12- H29  | 0.07         | 0.99    | 0.007 |
| 72.                   | BD | (1) | H43- O45 | 882. | BD*(1)  | C 6- Ru52 | 0.06         | 0.73    | 0.007 |
| 72.                   | BD | (1) | H43- O45 | 926. | BD*(1)  | C16- Ru52 | 3.69         | 0.64    | 0.046 |
| 100.                  | CR | (1) | O45      | 801. | RY*(6)  | Ru52      | 0.07         | 19.72   | 0.034 |
| 100.                  | CR | (1) | O45      | 926. | BD*(1)  | C16- Ru52 | 3.17         | 18.60   | 0.234 |



|      |    |      |     |      |         |          |              |         |       |
|------|----|------|-----|------|---------|----------|--------------|---------|-------|
| 149. | LP | ( 1) | 045 | 273. | RY*( 1) | C 8      | 0.06         | 1.77    | 0.009 |
| 149. | LP | ( 1) | 045 | 428. | RY*( 6) | C18      | 0.07         | 2.81    | 0.013 |
| 149. | LP | ( 1) | 045 | 568. | RY*( 1) | H29      | 0.06         | 1.67    | 0.009 |
| 149. | LP | ( 1) | 045 | 570. | RY*( 3) | H29      | 0.10         | 1.83    | 0.012 |
| 149. | LP | ( 1) | 045 | 676. | RY*( 4) | O46      | 0.05         | 0.90    | 0.006 |
| 149. | LP | ( 1) | 045 | 796. | RY*( 1) | Ru52     | 2.76         | 0.26    | 0.024 |
| 149. | LP | ( 1) | 045 | 797. | RY*( 2) | Ru52     | 0.67         | 0.87    | 0.022 |
| 149. | LP | ( 1) | 045 | 798. | RY*( 3) | Ru52     | 0.08         | 1.11    | 0.008 |
| 149. | LP | ( 1) | 045 | 799. | RY*( 4) | Ru52     | 0.11         | 2.13    | 0.014 |
| 149. | LP | ( 1) | 045 | 801. | RY*( 6) | Ru52     | 0.42         | 1.53    | 0.023 |
| 149. | LP | ( 1) | 045 | 802. | RY*( 7) | Ru52     | 0.22         | 3.47    | 0.025 |
| 149. | LP | ( 1) | 045 | 803. | RY*( 8) | Ru52     | 0.65         | 1.49    | 0.028 |
| 149. | LP | ( 1) | 045 | 808. | RY*(13) | Ru52     | 0.44         | 2.82    | 0.032 |
| 149. | LP | ( 1) | 045 | 809. | RY*(14) | Ru52     | 0.09         | 5.65    | 0.020 |
| 149. | LP | ( 1) | 045 | 810. | RY*(15) | Ru52     | 0.75         | 6.49    | 0.063 |
| 149. | LP | ( 1) | 045 | 811. | RY*(16) | Ru52     | 0.28         | 6.42    | 0.038 |
| 149. | LP | ( 1) | 045 | 812. | RY*(17) | Ru52     | 0.25         | 4.31    | 0.030 |
| 149. | LP | ( 1) | 045 | 813. | RY*(18) | Ru52     | 0.05         | 5.87    | 0.015 |
| 149. | LP | ( 1) | 045 | 816. | RY*(21) | Ru52     | 0.09         | 13.77   | 0.031 |
| 149. | LP | ( 1) | 045 | 818. | RY*(23) | Ru52     | 0.35         | 6.95    | 0.045 |
| 149. | LP | ( 1) | 045 | 819. | RY*(24) | Ru52     | 0.1929463.75 | 2.127   |       |
| 149. | LP | ( 1) | 045 | 820. | RY*(25) | Ru52     | 0.43         | 765.47  | 0.514 |
| 149. | LP | ( 1) | 045 | 821. | RY*(26) | Ru52     | 0.3612899.74 | 1.946   |       |
| 149. | LP | ( 1) | 045 | 833. | RY*(38) | Ru52     | 0.42         | 3361.83 | 1.070 |
| 149. | LP | ( 1) | 045 | 834. | RY*(39) | Ru52     | 0.11         | 18.32   | 0.041 |
| 149. | LP | ( 1) | 045 | 835. | RY*(40) | Ru52     | 0.08         | 54.34   | 0.057 |
| 149. | LP | ( 1) | 045 | 836. | RY*(41) | Ru52     | 0.27         | 777.11  | 0.411 |
| 149. | LP | ( 1) | 045 | 837. | RY*(42) | Ru52     | 0.15         | 3154.85 | 0.616 |
| 149. | LP | ( 1) | 045 | 842. | RY*(47) | Ru52     | 0.06         | 19.91   | 0.030 |
| 149. | LP | ( 1) | 045 | 866. | BD*( 1) | C12- H29 | 0.54         | 0.76    | 0.018 |
| 149. | LP | ( 1) | 045 | 883. | BD*( 1) | C 6- O46 | 0.07         | 0.41    | 0.005 |
| 149. | LP | ( 1) | 045 | 884. | BD*( 2) | C 6- O46 | 0.06         | 0.40    | 0.005 |
| 149. | LP | ( 1) | 045 | 926. | BD*( 1) | C16-Ru52 | 8.04         | 0.42    | 0.055 |
| 150. | LP | ( 1) | 045 | 167. | LP*( 1) | C16      | 0.10         | 0.44    | 0.007 |
| 150. | LP | ( 2) | 045 | 243. | RY*( 1) | C 6      | 0.24         | 2.02    | 0.020 |
| 150. | LP | ( 2) | 045 | 273. | RY*( 1) | C 8      | 0.33         | 1.89    | 0.023 |
| 150. | LP | ( 2) | 045 | 279. | RY*( 7) | C 8      | 0.12         | 4.87    | 0.022 |
| 150. | LP | ( 2) | 045 | 394. | RY*( 2) | C16      | 0.07         | 1.14    | 0.008 |
| 150. | LP | ( 2) | 045 | 395. | RY*( 3) | C16      | 0.06         | 1.51    | 0.009 |
| 150. | LP | ( 2) | 045 | 404. | RY*(12) | C16      | 0.16         | 3.43    | 0.022 |
| 150. | LP | ( 2) | 045 | 405. | RY*(13) | C16      | 0.09         | 3.80    | 0.018 |
| 150. | LP | ( 2) | 045 | 406. | RY*(14) | C16      | 0.08         | 27.07   | 0.045 |
| 150. | LP | ( 2) | 045 | 407. | RY*(15) | C16      | 0.08         | 40.32   | 0.054 |
| 150. | LP | ( 2) | 045 | 428. | RY*( 6) | C18      | 0.07         | 2.93    | 0.014 |
| 150. | LP | ( 2) | 045 | 570. | RY*( 3) | H29      | 0.11         | 1.95    | 0.014 |
| 150. | LP | ( 2) | 045 | 676. | RY*( 4) | O46      | 0.10         | 1.02    | 0.009 |
| 150. | LP | ( 2) | 045 | 691. | RY*( 4) | O47      | 0.08         | 0.98    | 0.008 |
| 150. | LP | ( 2) | 045 | 733. | RY*( 1) | N50      | 0.17         | 2.09    | 0.018 |
| 150. | LP | ( 2) | 045 | 796. | RY*( 1) | Ru52     | 6.66         | 0.38    | 0.047 |
| 150. | LP | ( 2) | 045 | 797. | RY*( 2) | Ru52     | 1.79         | 1.00    | 0.040 |
| 150. | LP | ( 2) | 045 | 798. | RY*( 3) | Ru52     | 0.44         | 1.23    | 0.022 |
| 150. | LP | ( 2) | 045 | 799. | RY*( 4) | Ru52     | 0.13         | 2.25    | 0.016 |
| 150. | LP | ( 2) | 045 | 801. | RY*( 6) | Ru52     | 1.51         | 1.65    | 0.047 |
| 150. | LP | ( 2) | 045 | 802. | RY*( 7) | Ru52     | 0.11         | 3.59    | 0.018 |
| 150. | LP | ( 2) | 045 | 803. | RY*( 8) | Ru52     | 0.71         | 1.61    | 0.032 |
| 150. | LP | ( 2) | 045 | 804. | RY*( 9) | Ru52     | 0.22         | 2.73    | 0.023 |
| 150. | LP | ( 2) | 045 | 809. | RY*(14) | Ru52     | 0.05         | 5.77    | 0.016 |
| 150. | LP | ( 2) | 045 | 810. | RY*(15) | Ru52     | 0.84         | 6.61    | 0.070 |
| 150. | LP | ( 2) | 045 | 811. | RY*(16) | Ru52     | 0.13         | 6.54    | 0.027 |
| 150. | LP | ( 2) | 045 | 812. | RY*(17) | Ru52     | 0.29         | 4.44    | 0.033 |
| 150. | LP | ( 2) | 045 | 813. | RY*(18) | Ru52     | 0.38         | 5.99    | 0.045 |
| 150. | LP | ( 2) | 045 | 814. | RY*(19) | Ru52     | 0.19         | 5.72    | 0.031 |
| 150. | LP | ( 2) | 045 | 818. | RY*(23) | Ru52     | 0.41         | 7.07    | 0.050 |
| 150. | LP | ( 2) | 045 | 819. | RY*(24) | Ru52     | 0.1229463.87 | 1.779   |       |
| 150. | LP | ( 2) | 045 | 820. | RY*(25) | Ru52     | 0.30         | 765.59  | 0.454 |
| 150. | LP | ( 2) | 045 | 821. | RY*(26) | Ru52     | 0.2012899.86 | 1.499   |       |
| 150. | LP | ( 2) | 045 | 833. | RY*(38) | Ru52     | 0.24         | 3361.95 | 0.840 |
| 150. | LP | ( 2) | 045 | 834. | RY*(39) | Ru52     | 0.10         | 18.44   | 0.041 |
| 150. | LP | ( 2) | 045 | 835. | RY*(40) | Ru52     | 0.06         | 54.46   | 0.055 |
| 150. | LP | ( 2) | 045 | 836. | RY*(41) | Ru52     | 0.16         | 777.23  | 0.334 |
| 150. | LP | ( 2) | 045 | 837. | RY*(42) | Ru52     | 0.10         | 3154.97 | 0.540 |
| 150. | LP | ( 2) | 045 | 838. | RY*(43) | Ru52     | 0.07         | 19.16   | 0.034 |
| 150. | LP | ( 2) | 045 | 863. | BD*( 1) | C12- C14 | 0.06         | 0.99    | 0.007 |
| 150. | LP | ( 2) | 045 | 878. | BD*( 1) | C 8- O47 | 0.25         | 0.52    | 0.010 |
| 150. | LP | ( 2) | 045 | 880. | BD*( 3) | C 8- O47 | 0.14         | 1.11    | 0.012 |
| 150. | LP | ( 2) | 045 | 881. | BD*( 1) | C 8-Ru52 | 0.77         | 0.60    | 0.020 |
| 150. | LP | ( 2) | 045 | 882. | BD*( 1) | C 6-Ru52 | 0.16         | 0.63    | 0.009 |
| 150. | LP | ( 2) | 045 | 883. | BD*( 1) | C 6- O46 | 0.14         | 0.53    | 0.008 |
| 150. | LP | ( 2) | 045 | 884. | BD*( 2) | C 6- O46 | 0.27         | 0.52    | 0.011 |
| 150. | LP | ( 2) | 045 | 885. | BD*( 3) | C 6- O46 | 0.23         | 1.12    | 0.015 |
| 150. | LP | ( 2) | 045 | 921. | BD*( 1) | C20- N50 | 0.24         | 0.94    | 0.014 |
| 150. | LP | ( 2) | 045 | 926. | BD*( 1) | C16-Ru52 | 30.84        | 0.54    | 0.117 |
| 150. | LP | ( 2) | 045 | 928. | BD*( 1) | C16- C18 | 0.07         | 1.04    | 0.008 |
| 151. | LP | ( 3) | 045 | 243. | RY*( 1) | C 6      | 0.22         | 1.75    | 0.019 |
| 151. | LP | ( 3) | 045 | 249. | RY*( 7) | C 6      | 0.13         | 6.52    | 0.027 |
| 151. | LP | ( 3) | 045 | 273. | RY*( 1) | C 8      | 0.44         | 1.62    | 0.025 |
| 151. | LP | ( 3) | 045 | 279. | RY*( 7) | C 8      | 0.26         | 4.60    | 0.033 |
| 151. | LP | ( 3) | 045 | 338. | RY*( 6) | C12      | 0.31         | 3.30    | 0.029 |
| 151. | LP | ( 3) | 045 | 393. | RY*( 1) | C16      | 0.33         | 1.30    | 0.020 |
| 151. | LP | ( 3) | 045 | 394. | RY*( 2) | C16      | 0.08         | 0.87    | 0.008 |
| 151. | LP | ( 3) | 045 | 395. | RY*( 3) | C16      | 0.14         | 1.24    | 0.013 |
| 151. | LP | ( 3) | 045 | 404. | RY*(14) | C16      | 0.09         | 3.16    | 0.016 |
| 151. | LP | ( 3) | 045 | 406. | RY*(14) | C16      | 0.07         | 26.80   | 0.040 |
| 151. | LP | ( 3) | 045 | 407. | RY*(15) | C16      | 0.07         | 40.04   | 0.049 |
| 151. | LP | ( 3) | 045 | 428. | RY*( 6) | C18      | 0.13         | 2.66    | 0.018 |
| 151. | LP | ( 3) | 045 | 459. | RY*( 7) | C20      | 0.05         | 3.62    | 0.013 |
| 151. | LP | ( 3) | 045 | 483. | RY*( 1) | C22      | 0.05         | 1.59    | 0.009 |
| 151. | LP | ( 3) | 045 | 568. | RY*( 1) | H29      | 0.06         | 1.52    | 0.009 |
| 151. | LP | ( 3) | 045 | 570. | RY*( 3) | H29      | 0.21         | 1.68    | 0.018 |
| 151. | LP | ( 3) | 045 | 676. | RY*( 4) | O46      | 0.11         | 0.75    | 0.009 |
| 151. | LP | ( 3) | 045 | 691. | RY*( 4) | O47      | 0.18         | 0.71    | 0.011 |
| 151. | LP | ( 3) | 045 | 733. | RY*( 1) | N50      | 0.14         | 1.82    | 0.015 |
| 151. | LP | ( 3) | 045 | 796. | RY*( 1) | Ru52     | 37.56        | 0.11    | 0.062 |
| 151. | LP | ( 3) | 045 | 797. | RY*( 2) | Ru52     | 4.45         | 0.72    | 0.054 |
| 151. | LP | ( 3) | 045 | 798. | RY*( 3) | Ru52     | 0.51         | 0.96    | 0.021 |
| 151. | LP | ( 3) | 045 | 799. | RY*( 4) | Ru52     | 0.36         | 1.98    | 0.025 |
| 151. | LP | ( 3) | 045 | 800. | RY*( 5) | Ru52     | 0.09         | 3.27    | 0.016 |
| 151. | LP | ( 3) | 045 | 801. | RY*( 6) | Ru52     | 0.39         | 1.38    | 0.022 |
| 151. | LP | ( 3) | 045 | 802. | RY*( 7) | Ru52     | 0.81         | 3.32    | 0.049 |
| 151. | LP | ( 3) | 045 | 803. | RY*( 8) | Ru52     | 0.69         | 1.34    | 0.029 |
| 151. | LP | ( 3) | 045 | 804. | RY*( 9) | Ru52     | 0.05         | 2.46    | 0.011 |
| 151. | LP | ( 3) | 045 | 807. | RY*(12) | Ru52     | 0.11         | 7.31    | 0.028 |
| 151. | LP | ( 3) | 045 | 808. | RY*(13) | Ru52     | 0.11         | 2.67    | 0.016 |
| 151. | LP | ( 3) | 045 | 809. | RY*(14) | Ru52     | 0.06         | 5.50    | 0.017 |
| 151. | LP | ( 3) | 045 | 810. | RY*(15) | Ru52     | 0.52         | 6.34    | 0.055 |
| 151. | LP | ( 3) | 045 | 811. | RY*(16) | Ru52     | 0.20         | 6.27    | 0.034 |

|                       |                       |              |         |       |
|-----------------------|-----------------------|--------------|---------|-------|
| 151. LP ( 3) O45      | 812. RY*(17)Ru52      | 0.44         | 4.17    | 0.041 |
| 151. LP ( 3) O45      | 814. RY*(19)Ru52      | 0.32         | 5.45    | 0.040 |
| 151. LP ( 3) O45      | 816. RY*(21)Ru52      | 0.11         | 13.62   | 0.037 |
| 151. LP ( 3) O45      | 817. RY*(22)Ru52      | 0.08         | 9.44    | 0.026 |
| 151. LP ( 3) O45      | 818. RY*(23)Ru52      | 0.76         | 6.80    | 0.068 |
| 151. LP ( 3) O45      | 819. RY*(24)Ru52      | 0.2929463.60 |         | 2.804 |
| 151. LP ( 3) O45      | 820. RY*(25)Ru52      | 0.64         | 765.32  | 0.669 |
| 151. LP ( 3) O45      | 821. RY*(26)Ru52      | 0.5312899.59 |         | 2.496 |
| 151. LP ( 3) O45      | 822. RY*(27)Ru52      | 0.06         | 49.49   | 0.052 |
| 151. LP ( 3) O45      | 833. RY*(38)Ru52      | 0.63         | 3361.68 | 1.384 |
| 151. LP ( 3) O45      | 836. RY*(41)Ru52      | 0.38         | 776.96  | 0.519 |
| 151. LP ( 3) O45      | 837. RY*(42)Ru52      | 0.24         | 3154.70 | 0.836 |
| 151. LP ( 3) O45      | 878. BD*( 1) C 8- O47 | 0.33         | 0.25    | 0.008 |
| 151. LP ( 3) O45      | 880. BD*( 3) C 8- O47 | 0.17         | 0.84    | 0.011 |
| 151. LP ( 3) O45      | 881. BD*( 1) C 8-Ru52 | 0.09         | 0.33    | 0.005 |
| 151. LP ( 3) O45      | 883. BD*( 1) C 6- O46 | 0.33         | 0.26    | 0.008 |
| 151. LP ( 3) O45      | 884. BD*( 2) C 6- O46 | 0.09         | 0.25    | 0.004 |
| 151. LP ( 3) O45      | 885. BD*( 3) C 6- O46 | 0.16         | 0.85    | 0.011 |
| 151. LP ( 3) O45      | 921. BD*( 1) C20- N50 | 0.12         | 0.67    | 0.008 |
| 151. LP ( 3) O45      | 926. BD*( 1) C16-Ru52 | 12.37        | 0.27    | 0.052 |
| within unit 3         |                       |              |         |       |
| 72. BD ( 1) H43- O45  | 638. RY*( 1) H43      | 0.61         | 2.14    | 0.032 |
| 72. BD ( 1) H43- O45  | 640. RY*( 3) H43      | 0.83         | 2.72    | 0.042 |
| 149. LP ( 1) O45      | 639. RY*( 2) H43      | 0.53         | 2.11    | 0.030 |
| 150. LP ( 2) O45      | 641. RY*( 4) H43      | 0.65         | 3.14    | 0.043 |
| 151. LP ( 3) O45      | 638. RY*( 1) H43      | 0.51         | 1.77    | 0.029 |
| 151. LP ( 3) O45      | 640. RY*( 3) H43      | 1.04         | 2.35    | 0.047 |
| from unit 3 to unit 4 |                       |              |         |       |
| 72. BD ( 1) H43- O45  | 845. RY*( 2)C153      | 0.09         | 1.57    | 0.010 |
| 72. BD ( 1) H43- O45  | 846. RY*( 3)C153      | 0.33         | 6.67    | 0.042 |
| 72. BD ( 1) H43- O45  | 847. RY*( 4)C153      | 1.43         | 3.04    | 0.059 |
| 72. BD ( 1) H43- O45  | 848. RY*( 5)C153      | 0.45         | 7.14    | 0.051 |
| 72. BD ( 1) H43- O45  | 856. RY*(13)C153      | 0.20         | 5.98    | 0.031 |
| 149. LP ( 1) O45      | 845. RY*( 2)C153      | 0.07         | 1.35    | 0.009 |
| 149. LP ( 1) O45      | 846. RY*( 3)C153      | 0.10         | 6.45    | 0.023 |
| 149. LP ( 1) O45      | 847. RY*( 4)C153      | 0.46         | 2.82    | 0.032 |
| 149. LP ( 1) O45      | 848. RY*( 5)C153      | 0.14         | 6.91    | 0.028 |
| 149. LP ( 1) O45      | 851. RY*( 8)C153      | 0.07         | 1.55    | 0.009 |
| 150. LP ( 2) O45      | 847. RY*( 4)C153      | 0.41         | 2.94    | 0.033 |
| 150. LP ( 2) O45      | 851. RY*( 8)C153      | 0.06         | 1.67    | 0.009 |
| 151. LP ( 3) O45      | 845. RY*( 2)C153      | 0.08         | 1.20    | 0.009 |
| 151. LP ( 3) O45      | 846. RY*( 3)C153      | 0.66         | 6.30    | 0.061 |
| 151. LP ( 3) O45      | 847. RY*( 4)C153      | 0.06         | 2.67    | 0.012 |
| 151. LP ( 3) O45      | 848. RY*( 5)C153      | 0.87         | 6.76    | 0.073 |
| 151. LP ( 3) O45      | 853. RY*(10)C153      | 0.30         | 4.83    | 0.036 |
| 151. LP ( 3) O45      | 856. RY*(13)C153      | 0.06         | 5.61    | 0.018 |
| from unit 4 to unit 1 |                       |              |         |       |
| 142. CR ( 1)C153      | 912. BD*( 1) C 4-Ru51 | 0.82         | 100.57  | 0.282 |
| 143. CR ( 2)C153      | 901. BD*( 2) C11- C15 | 0.11         | 9.83    | 0.032 |
| 143. CR ( 2)C153      | 902. BD*( 1) C11-Ru51 | 0.14         | 9.83    | 0.036 |
| 143. CR ( 2)C153      | 912. BD*( 1) C 4-Ru51 | 6.09         | 9.88    | 0.240 |
| 145. CR ( 4)C153      | 912. BD*( 1) C 4-Ru51 | 0.31         | 7.02    | 0.046 |
| 146. CR ( 5)C153      | 912. BD*( 1) C 4-Ru51 | 0.26         | 7.01    | 0.042 |
| 163. LP ( 1)C153      | 213. RY*( 1) C 4      | 0.22         | 2.98    | 0.023 |
| 163. LP ( 1)C153      | 219. RY*( 7) C 4      | 0.19         | 7.35    | 0.033 |
| 163. LP ( 1)C153      | 314. RY*(12) C10      | 0.05         | 3.47    | 0.012 |
| 163. LP ( 1)C153      | 383. RY*( 6) C15      | 0.08         | 4.20    | 0.017 |
| 163. LP ( 1)C153      | 646. RY*( 4) O44      | 0.06         | 1.45    | 0.009 |
| 163. LP ( 1)C153      | 706. RY*( 4) O48      | 0.08         | 1.44    | 0.010 |
| 163. LP ( 1)C153      | 718. RY*( 1) N49      | 0.07         | 2.64    | 0.012 |
| 163. LP ( 1)C153      | 748. RY*( 1) Ru51     | 0.43         | 18.78   | 0.081 |
| 163. LP ( 1)C153      | 750. RY*( 3) Ru51     | 0.24         | 8.98    | 0.042 |
| 163. LP ( 1)C153      | 751. RY*( 4) Ru51     | 0.13         | 1.98    | 0.014 |
| 163. LP ( 1)C153      | 752. RY*( 5) Ru51     | 0.24         | 4.89    | 0.030 |
| 163. LP ( 1)C153      | 753. RY*( 6) Ru51     | 0.10         | 3.84    | 0.018 |
| 163. LP ( 1)C153      | 755. RY*( 8) Ru51     | 0.51         | 6.87    | 0.053 |
| 163. LP ( 1)C153      | 757. RY*(10) Ru51     | 0.48         | 21.97   | 0.091 |
| 163. LP ( 1)C153      | 758. RY*(11) Ru51     | 0.05         | 7.56    | 0.017 |
| 163. LP ( 1)C153      | 759. RY*(12) Ru51     | 0.08         | 15.46   | 0.032 |
| 163. LP ( 1)C153      | 760. RY*(13) Ru51     | 0.54         | 5.51    | 0.049 |
| 163. LP ( 1)C153      | 762. RY*(15) Ru51     | 0.45         | 14.95   | 0.073 |
| 163. LP ( 1)C153      | 763. RY*(16) Ru51     | 0.48         | 13.53   | 0.072 |
| 163. LP ( 1)C153      | 764. RY*(17) Ru51     | 0.07         | 11.26   | 0.025 |
| 163. LP ( 1)C153      | 765. RY*(18) Ru51     | 0.14         | 7.43    | 0.029 |
| 163. LP ( 1)C153      | 767. RY*(20) Ru51     | 0.43         | 17.93   | 0.078 |
| 163. LP ( 1)C153      | 768. RY*(21) Ru51     | 0.23         | 17.58   | 0.057 |
| 163. LP ( 1)C153      | 770. RY*(23) Ru51     | 0.16         | 16.88   | 0.046 |
| 163. LP ( 1)C153      | 772. RY*(25) Ru51     | 0.20         | 9406.78 | 1.213 |
| 163. LP ( 1)C153      | 773. RY*(26) Ru51     | 0.1337514.33 |         | 1.843 |
| 163. LP ( 1)C153      | 776. RY*(29) Ru51     | 0.35         | 78.15   | 0.149 |
| 163. LP ( 1)C153      | 777. RY*(30) Ru51     | 0.26         | 26.44   | 0.074 |
| 163. LP ( 1)C153      | 780. RY*(33) Ru51     | 0.35         | 325.05  | 0.301 |
| 163. LP ( 1)C153      | 785. RY*(38) Ru51     | 0.26         | 596.89  | 0.355 |
| 163. LP ( 1)C153      | 786. RY*(39) Ru51     | 0.10         | 18.61   | 0.039 |
| 163. LP ( 1)C153      | 787. RY*(40) Ru51     | 0.05         | 54.62   | 0.049 |
| 163. LP ( 1)C153      | 788. RY*(41) Ru51     | 0.06         | 89.66   | 0.068 |
| 163. LP ( 1)C153      | 789. RY*(42) Ru51     | 0.17         | 533.49  | 0.273 |
| 163. LP ( 1)C153      | 900. BD*( 1) C11- C15 | 0.13         | 1.23    | 0.011 |
| 163. LP ( 1)C153      | 901. BD*( 2) C11- C15 | 0.45         | 0.75    | 0.018 |
| 163. LP ( 1)C153      | 902. BD*( 1) C11-Ru51 | 0.09         | 0.75    | 0.008 |
| 163. LP ( 1)C153      | 912. BD*( 1) C 4-Ru51 | 12.73        | 0.80    | 0.099 |
| 163. LP ( 1)C153      | 914. BD*( 1) C10- O48 | 0.12         | 0.71    | 0.009 |
| 163. LP ( 1)C153      | 916. BD*( 3) C10- O48 | 0.11         | 1.32    | 0.011 |
| 164. LP ( 2)C153      | 751. RY*( 4) Ru51     | 0.10         | 1.49    | 0.011 |
| 164. LP ( 2)C153      | 761. RY*(14) Ru51     | 0.12         | 7.77    | 0.028 |
| 164. LP ( 2)C153      | 778. RY*(31) Ru51     | 0.08         | 18.88   | 0.034 |
| 164. LP ( 2)C153      | 782. RY*(35) Ru51     | 0.06         | 18.69   | 0.030 |
| 164. LP ( 2)C153      | 794. RY*(47) Ru51     | 0.07         | 19.67   | 0.034 |
| 164. LP ( 2)C153      | 890. BD*( 1) C 2- N49 | 0.06         | 0.68    | 0.006 |
| 164. LP ( 2)C153      | 897. BD*( 1) C 9- C11 | 0.10         | 0.73    | 0.008 |
| 164. LP ( 2)C153      | 900. BD*( 1) C11- C15 | 0.07         | 0.75    | 0.006 |
| 164. LP ( 2)C153      | 910. BD*( 2) C 4- O44 | 0.36         | 0.22    | 0.008 |
| 164. LP ( 2)C153      | 913. BD*( 1) C10-Ru51 | 0.27         | 0.35    | 0.009 |
| 164. LP ( 2)C153      | 914. BD*( 1) C10- O48 | 0.08         | 0.23    | 0.004 |
| 164. LP ( 2)C153      | 915. BD*( 2) C10- O48 | 0.06         | 0.23    | 0.003 |
| 165. LP ( 3)C153      | 176. RY*( 9) C 1      | 0.10         | 3.59    | 0.019 |
| 165. LP ( 3)C153      | 185. RY*( 3) C 2      | 0.06         | 2.19    | 0.011 |
| 165. LP ( 3)C153      | 187. RY*( 5) C 2      | 0.12         | 2.33    | 0.016 |
| 165. LP ( 3)C153      | 188. RY*( 6) C 2      | 0.63         | 4.05    | 0.049 |
| 165. LP ( 3)C153      | 189. RY*( 7) C 2      | 0.09         | 5.25    | 0.021 |
| 165. LP ( 3)C153      | 190. RY*( 8) C 2      | 0.06         | 9.17    | 0.023 |
| 165. LP ( 3)C153      | 192. RY*(10) C 2      | 0.08         | 3.68    | 0.017 |
| 165. LP ( 3)C153      | 207. RY*(10) C 3      | 0.07         | 9.02    | 0.025 |

|      |             |      |                   |              |         |       |
|------|-------------|------|-------------------|--------------|---------|-------|
| 165. | LP ( 3)C153 | 213. | RY*( 1) C 4       | 0.99         | 2.66    | 0.050 |
| 165. | LP ( 3)C153 | 214. | RY*( 2) C 4       | 0.16         | 1.87    | 0.017 |
| 165. | LP ( 3)C153 | 215. | RY*( 3) C 4       | 0.12         | 1.99    | 0.015 |
| 165. | LP ( 3)C153 | 219. | RY*( 7) C 4       | 1.19         | 7.02    | 0.089 |
| 165. | LP ( 3)C153 | 220. | RY*( 8) C 4       | 0.37         | 4.47    | 0.040 |
| 165. | LP ( 3)C153 | 221. | RY*( 9) C 4       | 0.08         | 3.34    | 0.016 |
| 165. | LP ( 3)C153 | 223. | RY*(11) C 4       | 0.06         | 3.48    | 0.015 |
| 165. | LP ( 3)C153 | 224. | RY*(12) C 4       | 0.10         | 3.76    | 0.019 |
| 165. | LP ( 3)C153 | 226. | RY*(14) C 4       | 0.06         | 46.01   | 0.053 |
| 165. | LP ( 3)C153 | 260. | RY*( 3) C 7       | 0.10         | 2.37    | 0.015 |
| 165. | LP ( 3)C153 | 261. | RY*( 4) C 7       | 0.07         | 1.89    | 0.011 |
| 165. | LP ( 3)C153 | 264. | RY*( 7) C 7       | 0.45         | 4.43    | 0.043 |
| 165. | LP ( 3)C153 | 267. | RY*(10) C 7       | 0.09         | 4.00    | 0.019 |
| 165. | LP ( 3)C153 | 288. | RY*( 1) C 9       | 0.29         | 1.84    | 0.023 |
| 165. | LP ( 3)C153 | 289. | RY*( 2) C 9       | 0.05         | 0.95    | 0.007 |
| 165. | LP ( 3)C153 | 290. | RY*( 3) C 9       | 0.18         | 2.21    | 0.019 |
| 165. | LP ( 3)C153 | 291. | RY*( 4) C 9       | 0.11         | 1.57    | 0.013 |
| 165. | LP ( 3)C153 | 292. | RY*( 5) C 9       | 0.08         | 2.36    | 0.014 |
| 165. | LP ( 3)C153 | 293. | RY*( 6) C 9       | 0.45         | 4.29    | 0.043 |
| 165. | LP ( 3)C153 | 295. | RY*( 8) C 9       | 0.05         | 4.63    | 0.015 |
| 165. | LP ( 3)C153 | 297. | RY*(10) C 9       | 0.05         | 4.43    | 0.015 |
| 165. | LP ( 3)C153 | 303. | RY*( 1) C10       | 0.60         | 2.47    | 0.037 |
| 165. | LP ( 3)C153 | 305. | RY*( 3) C10       | 0.10         | 3.01    | 0.017 |
| 165. | LP ( 3)C153 | 309. | RY*( 7) C10       | 0.38         | 7.08    | 0.050 |
| 165. | LP ( 3)C153 | 310. | RY*( 8) C10       | 0.25         | 4.38    | 0.032 |
| 165. | LP ( 3)C153 | 311. | RY*( 9) C10       | 0.09         | 4.30    | 0.019 |
| 165. | LP ( 3)C153 | 313. | RY*(11) C10       | 0.11         | 2.19    | 0.015 |
| 165. | LP ( 3)C153 | 315. | RY*(13) C10       | 0.12         | 3.19    | 0.019 |
| 165. | LP ( 3)C153 | 318. | RY*( 1) C11       | 0.39         | 1.64    | 0.024 |
| 165. | LP ( 3)C153 | 319. | RY*( 2) C11       | 0.10         | 1.15    | 0.010 |
| 165. | LP ( 3)C153 | 321. | RY*( 4) C11       | 0.28         | 2.66    | 0.027 |
| 165. | LP ( 3)C153 | 323. | RY*( 6) C11       | 0.08         | 2.81    | 0.014 |
| 165. | LP ( 3)C153 | 326. | RY*( 9) C11       | 0.21         | 14.38   | 0.053 |
| 165. | LP ( 3)C153 | 329. | RY*(12) C11       | 0.32         | 3.55    | 0.033 |
| 165. | LP ( 3)C153 | 330. | RY*(13) C11       | 0.25         | 3.88    | 0.031 |
| 165. | LP ( 3)C153 | 378. | RY*( 1) C15       | 0.07         | 2.05    | 0.011 |
| 165. | LP ( 3)C153 | 379. | RY*( 2) C15       | 0.11         | 0.90    | 0.010 |
| 165. | LP ( 3)C153 | 380. | RY*( 3) C15       | 0.11         | 2.15    | 0.015 |
| 165. | LP ( 3)C153 | 381. | RY*( 4) C15       | 0.11         | 1.42    | 0.012 |
| 165. | LP ( 3)C153 | 383. | RY*( 6) C15       | 0.87         | 3.87    | 0.057 |
| 165. | LP ( 3)C153 | 384. | RY*( 7) C15       | 0.14         | 8.58    | 0.034 |
| 165. | LP ( 3)C153 | 444. | RY*( 7) C19       | 0.06         | 6.66    | 0.019 |
| 165. | LP ( 3)C153 | 450. | RY*(13) C19       | 0.05         | 3.05    | 0.012 |
| 165. | LP ( 3)C153 | 560. | RY*( 3) H27       | 0.20         | 1.36    | 0.016 |
| 165. | LP ( 3)C153 | 561. | RY*( 4) H27       | 0.08         | 2.19    | 0.013 |
| 165. | LP ( 3)C153 | 565. | RY*( 3) H28       | 0.09         | 2.06    | 0.014 |
| 165. | LP ( 3)C153 | 575. | RY*( 3) H30       | 0.07         | 2.22    | 0.012 |
| 165. | LP ( 3)C153 | 588. | RY*( 1) H33       | 0.08         | 1.77    | 0.011 |
| 165. | LP ( 3)C153 | 590. | RY*( 3) H33       | 0.08         | 1.35    | 0.010 |
| 165. | LP ( 3)C153 | 595. | RY*( 3) H34       | 0.21         | 1.83    | 0.019 |
| 165. | LP ( 3)C153 | 630. | RY*( 3) H41       | 0.21         | 1.63    | 0.018 |
| 165. | LP ( 3)C153 | 635. | RY*( 3) H42       | 0.06         | 1.47    | 0.009 |
| 165. | LP ( 3)C153 | 645. | RY*( 3) O44       | 0.16         | 2.16    | 0.018 |
| 165. | LP ( 3)C153 | 646. | RY*( 4) O44       | 0.86         | 1.12    | 0.030 |
| 165. | LP ( 3)C153 | 647. | RY*( 5) O44       | 0.29         | 2.80    | 0.028 |
| 165. | LP ( 3)C153 | 648. | RY*( 6) O44       | 0.15         | 3.26    | 0.021 |
| 165. | LP ( 3)C153 | 650. | RY*( 8) O44       | 0.06         | 4.03    | 0.015 |
| 165. | LP ( 3)C153 | 653. | RY*(11) O44       | 0.09         | 10.50   | 0.031 |
| 165. | LP ( 3)C153 | 705. | RY*( 3) O48       | 0.23         | 2.39    | 0.023 |
| 165. | LP ( 3)C153 | 706. | RY*( 4) O48       | 0.56         | 1.12    | 0.024 |
| 165. | LP ( 3)C153 | 707. | RY*( 5) O48       | 0.17         | 2.49    | 0.020 |
| 165. | LP ( 3)C153 | 708. | RY*( 6) O48       | 0.17         | 2.29    | 0.019 |
| 165. | LP ( 3)C153 | 713. | RY*(11) O48       | 0.08         | 9.81    | 0.027 |
| 165. | LP ( 3)C153 | 718. | RY*( 1) N49       | 0.30         | 2.31    | 0.026 |
| 165. | LP ( 3)C153 | 721. | RY*( 4) N49       | 0.14         | 4.95    | 0.025 |
| 165. | LP ( 3)C153 | 726. | RY*( 9) N49       | 0.23         | 4.91    | 0.033 |
| 165. | LP ( 3)C153 | 748. | RY*( 1) Ru51      | 4.42         | 18.45   | 0.278 |
| 165. | LP ( 3)C153 | 749. | RY*( 2) Ru51      | 0.14         | 1.29    | 0.013 |
| 165. | LP ( 3)C153 | 750. | RY*( 3) Ru51      | 3.11         | 8.65    | 0.160 |
| 165. | LP ( 3)C153 | 751. | RY*( 4) Ru51      | 0.32         | 1.65    | 0.022 |
| 165. | LP ( 3)C153 | 752. | RY*( 5) Ru51      | 1.21         | 4.56    | 0.072 |
| 165. | LP ( 3)C153 | 753. | RY*( 6) Ru51      | 0.61         | 3.51    | 0.045 |
| 165. | LP ( 3)C153 | 754. | RY*( 7) Ru51      | 0.58         | 4.60    | 0.050 |
| 165. | LP ( 3)C153 | 755. | RY*( 8) Ru51      | 3.40         | 6.54    | 0.145 |
| 165. | LP ( 3)C153 | 756. | RY*( 9) Ru51      | 0.31         | 3.01    | 0.030 |
| 165. | LP ( 3)C153 | 757. | RY*(10) Ru51      | 3.27         | 21.64   | 0.259 |
| 165. | LP ( 3)C153 | 758. | RY*(11) Ru51      | 0.07         | 7.23    | 0.022 |
| 165. | LP ( 3)C153 | 759. | RY*(12) Ru51      | 1.82         | 15.14   | 0.162 |
| 165. | LP ( 3)C153 | 760. | RY*(13) Ru51      | 1.37         | 5.18    | 0.082 |
| 165. | LP ( 3)C153 | 761. | RY*(14) Ru51      | 0.57         | 7.93    | 0.066 |
| 165. | LP ( 3)C153 | 762. | RY*(15) Ru51      | 3.23         | 14.62   | 0.212 |
| 165. | LP ( 3)C153 | 763. | RY*(16) Ru51      | 3.98         | 13.20   | 0.223 |
| 165. | LP ( 3)C153 | 764. | RY*(17) Ru51      | 1.50         | 10.93   | 0.125 |
| 165. | LP ( 3)C153 | 765. | RY*(18) Ru51      | 0.89         | 7.10    | 0.077 |
| 165. | LP ( 3)C153 | 766. | RY*(19) Ru51      | 0.63         | 7.24    | 0.066 |
| 165. | LP ( 3)C153 | 767. | RY*(20) Ru51      | 3.74         | 17.60   | 0.250 |
| 165. | LP ( 3)C153 | 768. | RY*(21) Ru51      | 1.76         | 17.25   | 0.170 |
| 165. | LP ( 3)C153 | 770. | RY*(23) Ru51      | 1.38         | 16.55   | 0.147 |
| 165. | LP ( 3)C153 | 772. | RY*(25) Ru51      | 1.67         | 9406.45 | 3.869 |
| 165. | LP ( 3)C153 | 773. | RY*(26) Ru51      | 1.0337514.00 |         | 6.061 |
| 165. | LP ( 3)C153 | 776. | RY*(29) Ru51      | 3.74         | 77.83   | 0.526 |
| 165. | LP ( 3)C153 | 777. | RY*(30) Ru51      | 3.19         | 26.11   | 0.281 |
| 165. | LP ( 3)C153 | 780. | RY*(33) Ru51      | 3.30         | 324.72  | 1.008 |
| 165. | LP ( 3)C153 | 785. | RY*(38) Ru51      | 2.43         | 596.56  | 1.174 |
| 165. | LP ( 3)C153 | 786. | RY*(39) Ru51      | 0.41         | 18.28   | 0.084 |
| 165. | LP ( 3)C153 | 787. | RY*(40) Ru51      | 0.24         | 54.29   | 0.112 |
| 165. | LP ( 3)C153 | 788. | RY*(41) Ru51      | 0.66         | 89.33   | 0.237 |
| 165. | LP ( 3)C153 | 789. | RY*(42) Ru51      | 1.60         | 533.16  | 0.899 |
| 165. | LP ( 3)C153 | 790. | RY*(43) Ru51      | 0.05         | 18.62   | 0.031 |
| 165. | LP ( 3)C153 | 791. | RY*(44) Ru51      | 0.06         | 54.42   | 0.057 |
| 165. | LP ( 3)C153 | 890. | BD*( 1) C 2- N49  | 0.15         | 0.83    | 0.011 |
| 165. | LP ( 3)C153 | 892. | BD*( 1) C 7- N49  | 0.13         | 0.81    | 0.010 |
| 165. | LP ( 3)C153 | 893. | BD*( 2) C 7- N49  | 0.19         | 0.35    | 0.008 |
| 165. | LP ( 3)C153 | 897. | BD*( 1) C 9- C11  | 0.06         | 0.89    | 0.007 |
| 165. | LP ( 3)C153 | 900. | BD*( 1) C11- C15  | 0.37         | 0.90    | 0.018 |
| 165. | LP ( 3)C153 | 901. | BD*( 2) C11- C15  | 1.11         | 0.42    | 0.019 |
| 165. | LP ( 3)C153 | 902. | BD*( 1) C11- Ru51 | 0.09         | 0.42    | 0.006 |
| 165. | LP ( 3)C153 | 909. | BD*( 1) C 4- O44  | 0.06         | 0.38    | 0.004 |
| 165. | LP ( 3)C153 | 911. | BD*( 3) C 4- O44  | 0.12         | 0.99    | 0.011 |
| 165. | LP ( 3)C153 | 912. | BD*( 1) C 4- Ru51 | 71.07        | 0.47    | 0.164 |
| 165. | LP ( 3)C153 | 913. | BD*( 1) C10- Ru51 | 0.38         | 0.51    | 0.012 |
| 165. | LP ( 3)C153 | 914. | BD*( 1) C10- O48  | 0.38         | 0.38    | 0.011 |
| 165. | LP ( 3)C153 | 915. | BD*( 2) C10- O48  | 0.12         | 0.39    | 0.006 |
| 165. | LP ( 3)C153 | 916. | BD*( 3) C10- O48  | 1.10         | 0.99    | 0.032 |
| 165. | LP ( 4)C153 | 169. | RY*( 2) C 1       | 0.08         | 0.81    | 0.008 |
| 166. | LP ( 4)C153 | 176. | RY*( 9) C 1       | 0.07         | 3.46    | 0.015 |

|      |    |         |      |         |      |           |         |       |
|------|----|---------|------|---------|------|-----------|---------|-------|
| 166. | LP | (4)C153 | 178. | RY*(11) | C 1  | 0.08      | 2.85    | 0.015 |
| 166. | LP | (4)C153 | 185. | RY*(3)  | C 2  | 0.28      | 2.06    | 0.023 |
| 166. | LP | (4)C153 | 187. | RY*(5)  | C 2  | 0.14      | 2.20    | 0.017 |
| 166. | LP | (4)C153 | 188. | RY*(6)  | C 2  | 1.67      | 3.93    | 0.079 |
| 166. | LP | (4)C153 | 189. | RY*(7)  | C 2  | 0.13      | 5.12    | 0.026 |
| 166. | LP | (4)C153 | 190. | RY*(8)  | C 2  | 0.11      | 9.04    | 0.031 |
| 166. | LP | (4)C153 | 191. | RY*(9)  | C 2  | 0.05      | 3.90    | 0.014 |
| 166. | LP | (4)C153 | 192. | RY*(10) | C 2  | 0.22      | 3.55    | 0.027 |
| 166. | LP | (4)C153 | 193. | RY*(11) | C 2  | 0.10      | 4.60    | 0.021 |
| 166. | LP | (4)C153 | 207. | RY*(10) | C 3  | 0.06      | 8.89    | 0.023 |
| 166. | LP | (4)C153 | 213. | RY*(1)  | C 4  | 1.32      | 2.53    | 0.056 |
| 166. | LP | (4)C153 | 214. | RY*(2)  | C 4  | 0.16      | 1.75    | 0.016 |
| 166. | LP | (4)C153 | 215. | RY*(3)  | C 4  | 0.15      | 1.87    | 0.016 |
| 166. | LP | (4)C153 | 219. | RY*(7)  | C 4  | 1.59      | 6.89    | 0.102 |
| 166. | LP | (4)C153 | 220. | RY*(8)  | C 4  | 0.10      | 4.35    | 0.021 |
| 166. | LP | (4)C153 | 222. | RY*(10) | C 4  | 0.09      | 1.95    | 0.013 |
| 166. | LP | (4)C153 | 223. | RY*(11) | C 4  | 0.06      | 3.35    | 0.013 |
| 166. | LP | (4)C153 | 224. | RY*(12) | C 4  | 0.11      | 3.63    | 0.020 |
| 166. | LP | (4)C153 | 225. | RY*(13) | C 4  | 0.12      | 2.82    | 0.018 |
| 166. | LP | (4)C153 | 260. | RY*(3)  | C 7  | 0.14      | 2.24    | 0.017 |
| 166. | LP | (4)C153 | 264. | RY*(7)  | C 7  | 0.52      | 4.31    | 0.046 |
| 166. | LP | (4)C153 | 267. | RY*(10) | C 7  | 0.12      | 3.88    | 0.021 |
| 166. | LP | (4)C153 | 288. | RY*(1)  | C 9  | 0.26      | 1.71    | 0.021 |
| 166. | LP | (4)C153 | 290. | RY*(3)  | C 9  | 0.18      | 2.08    | 0.019 |
| 166. | LP | (4)C153 | 291. | RY*(4)  | C 9  | 0.22      | 1.44    | 0.017 |
| 166. | LP | (4)C153 | 292. | RY*(5)  | C 9  | 0.07      | 2.23    | 0.012 |
| 166. | LP | (4)C153 | 293. | RY*(6)  | C 9  | 0.31      | 4.16    | 0.035 |
| 166. | LP | (4)C153 | 297. | RY*(10) | C 9  | 0.06      | 4.30    | 0.016 |
| 166. | LP | (4)C153 | 303. | RY*(1)  | C10  | 0.75      | 2.35    | 0.041 |
| 166. | LP | (4)C153 | 305. | RY*(3)  | C10  | 0.09      | 2.88    | 0.016 |
| 166. | LP | (4)C153 | 309. | RY*(7)  | C10  | 0.43      | 6.95    | 0.053 |
| 166. | LP | (4)C153 | 310. | RY*(8)  | C10  | 0.26      | 4.25    | 0.032 |
| 166. | LP | (4)C153 | 311. | RY*(9)  | C10  | 0.06      | 4.17    | 0.015 |
| 166. | LP | (4)C153 | 313. | RY*(11) | C10  | 0.10      | 2.06    | 0.014 |
| 166. | LP | (4)C153 | 315. | RY*(13) | C10  | 0.15      | 3.07    | 0.021 |
| 166. | LP | (4)C153 | 318. | RY*(1)  | C11  | 0.64      | 1.51    | 0.030 |
| 166. | LP | (4)C153 | 319. | RY*(2)  | C11  | 0.38      | 1.02    | 0.019 |
| 166. | LP | (4)C153 | 320. | RY*(3)  | C11  | 0.20      | 1.29    | 0.016 |
| 166. | LP | (4)C153 | 321. | RY*(4)  | C11  | 0.26      | 2.53    | 0.025 |
| 166. | LP | (4)C153 | 323. | RY*(6)  | C11  | 0.13      | 2.69    | 0.018 |
| 166. | LP | (4)C153 | 324. | RY*(7)  | C11  | 0.16      | 3.13    | 0.022 |
| 166. | LP | (4)C153 | 326. | RY*(9)  | C11  | 0.05      | 14.26   | 0.026 |
| 166. | LP | (4)C153 | 328. | RY*(11) | C11  | 0.06      | 3.63    | 0.014 |
| 166. | LP | (4)C153 | 329. | RY*(12) | C11  | 0.26      | 3.42    | 0.029 |
| 166. | LP | (4)C153 | 330. | RY*(13) | C11  | 0.14      | 3.76    | 0.022 |
| 166. | LP | (4)C153 | 358. | RY*(11) | C13  | 0.05      | 6.31    | 0.017 |
| 166. | LP | (4)C153 | 378. | RY*(1)  | C15  | 0.12      | 1.93    | 0.015 |
| 166. | LP | (4)C153 | 379. | RY*(2)  | C15  | 0.17      | 0.77    | 0.011 |
| 166. | LP | (4)C153 | 380. | RY*(3)  | C15  | 0.18      | 2.03    | 0.019 |
| 166. | LP | (4)C153 | 381. | RY*(4)  | C15  | 0.13      | 1.30    | 0.013 |
| 166. | LP | (4)C153 | 383. | RY*(6)  | C15  | 1.23      | 3.74    | 0.066 |
| 166. | LP | (4)C153 | 384. | RY*(7)  | C15  | 0.29      | 8.45    | 0.049 |
| 166. | LP | (4)C153 | 414. | RY*(7)  | C17  | 0.05      | 6.30    | 0.018 |
| 166. | LP | (4)C153 | 419. | RY*(12) | C17  | 0.06      | 5.72    | 0.018 |
| 166. | LP | (4)C153 | 444. | RY*(7)  | C19  | 0.08      | 6.53    | 0.022 |
| 166. | LP | (4)C153 | 447. | RY*(10) | C19  | 0.05      | 3.64    | 0.014 |
| 166. | LP | (4)C153 | 450. | RY*(13) | C19  | 0.06      | 2.92    | 0.013 |
| 166. | LP | (4)C153 | 558. | RY*(1)  | H27  | 0.33      | 1.64    | 0.023 |
| 166. | LP | (4)C153 | 560. | RY*(3)  | H27  | 0.29      | 1.23    | 0.019 |
| 166. | LP | (4)C153 | 561. | RY*(4)  | H27  | 0.20      | 2.06    | 0.020 |
| 166. | LP | (4)C153 | 565. | RY*(3)  | H28  | 0.11      | 1.94    | 0.014 |
| 166. | LP | (4)C153 | 575. | RY*(3)  | H30  | 0.08      | 2.09    | 0.012 |
| 166. | LP | (4)C153 | 588. | RY*(1)  | H33  | 0.18      | 1.65    | 0.017 |
| 166. | LP | (4)C153 | 589. | RY*(2)  | H33  | 0.08      | 2.19    | 0.013 |
| 166. | LP | (4)C153 | 590. | RY*(3)  | H33  | 0.06      | 1.22    | 0.009 |
| 166. | LP | (4)C153 | 592. | RY*(5)  | H33  | 0.05      | 4.39    | 0.015 |
| 166. | LP | (4)C153 | 595. | RY*(3)  | H34  | 0.23      | 1.70    | 0.019 |
| 166. | LP | (4)C153 | 630. | RY*(3)  | H41  | 0.22      | 1.50    | 0.018 |
| 166. | LP | (4)C153 | 634. | RY*(2)  | H42  | 0.06      | 1.88    | 0.011 |
| 166. | LP | (4)C153 | 635. | RY*(3)  | H42  | 0.20      | 1.35    | 0.016 |
| 166. | LP | (4)C153 | 636. | RY*(4)  | H42  | 0.07      | 1.85    | 0.011 |
| 166. | LP | (4)C153 | 645. | RY*(3)  | O44  | 0.16      | 2.03    | 0.018 |
| 166. | LP | (4)C153 | 646. | RY*(4)  | O44  | 1.05      | 0.99    | 0.032 |
| 166. | LP | (4)C153 | 647. | RY*(5)  | O44  | 0.33      | 2.67    | 0.029 |
| 166. | LP | (4)C153 | 648. | RY*(6)  | O44  | 0.21      | 3.13    | 0.025 |
| 166. | LP | (4)C153 | 650. | RY*(8)  | O44  | 0.12      | 3.90    | 0.021 |
| 166. | LP | (4)C153 | 653. | RY*(11) | O44  | 0.10      | 10.37   | 0.031 |
| 166. | LP | (4)C153 | 705. | RY*(3)  | O48  | 0.20      | 2.26    | 0.021 |
| 166. | LP | (4)C153 | 706. | RY*(4)  | O48  | 0.64      | 0.99    | 0.025 |
| 166. | LP | (4)C153 | 707. | RY*(5)  | O48  | 0.20      | 2.37    | 0.021 |
| 166. | LP | (4)C153 | 708. | RY*(6)  | O48  | 0.14      | 2.16    | 0.017 |
| 166. | LP | (4)C153 | 713. | RY*(11) | O48  | 0.08      | 9.68    | 0.027 |
| 166. | LP | (4)C153 | 718. | RY*(1)  | N49  | 0.37      | 2.19    | 0.028 |
| 166. | LP | (4)C153 | 719. | RY*(2)  | N49  | 0.12      | 1.12    | 0.011 |
| 166. | LP | (4)C153 | 726. | RY*(9)  | N49  | 0.15      | 4.78    | 0.026 |
| 166. | LP | (4)C153 | 748. | RY*(1)  | Ru51 | 4.58      | 18.33   | 0.282 |
| 166. | LP | (4)C153 | 750. | RY*(3)  | Ru51 | 3.57      | 8.53    | 0.170 |
| 166. | LP | (4)C153 | 751. | RY*(4)  | Ru51 | 0.19      | 1.52    | 0.017 |
| 166. | LP | (4)C153 | 752. | RY*(5)  | Ru51 | 1.73      | 4.43    | 0.086 |
| 166. | LP | (4)C153 | 753. | RY*(6)  | Ru51 | 0.39      | 3.38    | 0.035 |
| 166. | LP | (4)C153 | 754. | RY*(7)  | Ru51 | 1.39      | 4.47    | 0.077 |
| 166. | LP | (4)C153 | 755. | RY*(8)  | Ru51 | 2.54      | 6.41    | 0.125 |
| 166. | LP | (4)C153 | 756. | RY*(9)  | Ru51 | 0.82      | 2.88    | 0.047 |
| 166. | LP | (4)C153 | 757. | RY*(10) | Ru51 | 3.21      | 21.52   | 0.257 |
| 166. | LP | (4)C153 | 758. | RY*(11) | Ru51 | 0.08      | 7.10    | 0.023 |
| 166. | LP | (4)C153 | 759. | RY*(12) | Ru51 | 1.83      | 15.01   | 0.162 |
| 166. | LP | (4)C153 | 760. | RY*(13) | Ru51 | 2.33      | 5.05    | 0.106 |
| 166. | LP | (4)C153 | 761. | RY*(14) | Ru51 | 0.59      | 7.80    | 0.067 |
| 166. | LP | (4)C153 | 762. | RY*(15) | Ru51 | 3.03      | 14.49   | 0.205 |
| 166. | LP | (4)C153 | 763. | RY*(16) | Ru51 | 1.82      | 13.07   | 0.151 |
| 166. | LP | (4)C153 | 764. | RY*(17) | Ru51 | 1.14      | 10.80   | 0.108 |
| 166. | LP | (4)C153 | 765. | RY*(18) | Ru51 | 0.18      | 6.97    | 0.034 |
| 166. | LP | (4)C153 | 766. | RY*(19) | Ru51 | 1.30      | 7.12    | 0.094 |
| 166. | LP | (4)C153 | 767. | RY*(20) | Ru51 | 3.10      | 17.47   | 0.227 |
| 166. | LP | (4)C153 | 768. | RY*(21) | Ru51 | 2.11      | 17.12   | 0.186 |
| 166. | LP | (4)C153 | 770. | RY*(23) | Ru51 | 0.94      | 16.42   | 0.121 |
| 166. | LP | (4)C153 | 772. | RY*(25) | Ru51 | 1.95      | 9406.32 | 4.186 |
| 166. | LP | (4)C153 | 773. | RY*(26) | Ru51 | 1.1537513 | 88      | 6.412 |
| 166. | LP | (4)C153 | 774. | RY*(27) | Ru51 | 0.22      | 49.48   | 0.101 |
| 166. | LP | (4)C153 | 775. | RY*(28) | Ru51 | 0.15      | 186.34  | 0.164 |
| 166. | LP | (4)C153 | 776. | RY*(29) | Ru51 | 3.98      | 77.70   | 0.543 |
| 166. | LP | (4)C153 | 777. | RY*(30) | Ru51 | 3.05      | 25.98   | 0.275 |
| 166. | LP | (4)C153 | 780. | RY*(33) | Ru51 | 3.48      | 324.60  | 1.039 |
| 166. | LP | (4)C153 | 781. | RY*(34) | Ru51 | 0.09      | 50.45   | 0.066 |
| 166. | LP | (4)C153 | 784. | RY*(37) | Ru51 | 0.05      | 186.45  | 0.098 |
| 166. | LP | (4)C153 | 785. | RY*(38) | Ru51 | 2.73      | 596.44  | 1.247 |

|                       |             |      |                  |           |         |       |
|-----------------------|-------------|------|------------------|-----------|---------|-------|
| 166.                  | LP ( 4)C153 | 786. | RY*(39)Ru51      | 0.06      | 18.15   | 0.031 |
| 166.                  | LP ( 4)C153 | 788. | RY*(41)Ru51      | 0.73      | 89.21   | 0.249 |
| 166.                  | LP ( 4)C153 | 789. | RY*(42)Ru51      | 1.89      | 533.04  | 0.982 |
| 166.                  | LP ( 4)C153 | 790. | RY*(43)Ru51      | 0.06      | 18.50   | 0.033 |
| 166.                  | LP ( 4)C153 | 794. | RY*(47)Ru51      | 0.08      | 19.70   | 0.038 |
| 166.                  | LP ( 4)C153 | 901. | BD*( 2) C11- C15 | 0.44      | 0.29    | 0.010 |
| 166.                  | LP ( 4)C153 | 909. | BD*( 1) C 4- O44 | 0.18      | 0.26    | 0.006 |
| 166.                  | LP ( 4)C153 | 911. | BD*( 3) C 4- O44 | 0.08      | 0.86    | 0.008 |
| 166.                  | LP ( 4)C153 | 912. | BD*( 1) C 4-Ru51 | 2.56      | 0.34    | 0.027 |
| 166.                  | LP ( 4)C153 | 913. | BD*( 1) C10-Ru51 | 0.18      | 0.38    | 0.008 |
| 166.                  | LP ( 4)C153 | 914. | BD*( 1) C10- O48 | 0.09      | 0.26    | 0.004 |
| 166.                  | LP ( 4)C153 | 915. | BD*( 2) C10- O48 | 0.06      | 0.26    | 0.004 |
| 166.                  | LP ( 4)C153 | 916. | BD*( 3) C10- O48 | 0.19      | 0.86    | 0.012 |
| from unit 4 to unit 2 |             |      |                  |           |         |       |
| 142.                  | CR ( 1)C153 | 881. | BD*( 1) C 8-Ru52 | 0.84      | 100.56  | 0.285 |
| 143.                  | CR ( 2)C153 | 167. | LP*( 1) C16      | 0.16      | 9.72    | 0.047 |
| 143.                  | CR ( 2)C153 | 881. | BD*( 1) C 8-Ru52 | 6.22      | 9.87    | 0.243 |
| 143.                  | CR ( 2)C153 | 926. | BD*( 1) C16-Ru52 | 0.14      | 9.81    | 0.035 |
| 144.                  | CR ( 3)C153 | 881. | BD*( 1) C 8-Ru52 | 0.16      | 7.00    | 0.033 |
| 145.                  | CR ( 4)C153 | 881. | BD*( 1) C 8-Ru52 | 0.32      | 7.01    | 0.047 |
| 146.                  | CR ( 5)C153 | 881. | BD*( 1) C 8-Ru52 | 0.12      | 7.00    | 0.028 |
| 163.                  | LP ( 1)C153 | 167. | LP*( 1) C16      | 0.58      | 0.64    | 0.023 |
| 163.                  | LP ( 1)C153 | 570. | RY*( 3) H29      | 0.07      | 2.14    | 0.011 |
| 163.                  | LP ( 1)C153 | 796. | RY*( 1)Ru52      | 0.17      | 0.57    | 0.009 |
| 163.                  | LP ( 1)C153 | 797. | RY*( 2)Ru52      | 0.41      | 1.19    | 0.020 |
| 163.                  | LP ( 1)C153 | 798. | RY*( 3)Ru52      | 0.14      | 1.43    | 0.013 |
| 163.                  | LP ( 1)C153 | 799. | RY*( 4)Ru52      | 0.21      | 2.44    | 0.020 |
| 163.                  | LP ( 1)C153 | 803. | RY*( 8)Ru52      | 0.09      | 1.80    | 0.012 |
| 163.                  | LP ( 1)C153 | 805. | RY*(10)Ru52      | 22.04     | 0.08    | 0.037 |
| 163.                  | LP ( 1)C153 | 807. | RY*(12)Ru52      | 0.24      | 7.78    | 0.038 |
| 163.                  | LP ( 1)C153 | 808. | RY*(13)Ru52      | 0.23      | 3.13    | 0.024 |
| 163.                  | LP ( 1)C153 | 809. | RY*(14)Ru52      | 0.06      | 5.96    | 0.017 |
| 163.                  | LP ( 1)C153 | 812. | RY*(17)Ru52      | 0.50      | 4.63    | 0.043 |
| 163.                  | LP ( 1)C153 | 814. | RY*(19)Ru52      | 0.07      | 5.91    | 0.018 |
| 163.                  | LP ( 1)C153 | 819. | RY*(24)Ru52      | 0.1029464 | 0.6     | 1.527 |
| 163.                  | LP ( 1)C153 | 820. | RY*(25)Ru52      | 0.23      | 765.79  | 0.373 |
| 163.                  | LP ( 1)C153 | 821. | RY*(26)Ru52      | 0.1912900 | 0.5     | 1.390 |
| 163.                  | LP ( 1)C153 | 826. | RY*(31)Ru52      | 0.06      | 18.68   | 0.029 |
| 163.                  | LP ( 1)C153 | 830. | RY*(35)Ru52      | 0.07      | 18.83   | 0.033 |
| 163.                  | LP ( 1)C153 | 833. | RY*(38)Ru52      | 0.22      | 3362.14 | 0.763 |
| 163.                  | LP ( 1)C153 | 834. | RY*(39)Ru52      | 0.08      | 18.64   | 0.035 |
| 163.                  | LP ( 1)C153 | 836. | RY*(41)Ru52      | 0.14      | 777.42  | 0.298 |
| 163.                  | LP ( 1)C153 | 837. | RY*(42)Ru52      | 0.08      | 3155.16 | 0.441 |
| 163.                  | LP ( 1)C153 | 881. | BD*( 1) C 8-Ru52 | 12.31     | 0.79    | 0.096 |
| 163.                  | LP ( 1)C153 | 883. | BD*( 1) C 6- O46 | 0.09      | 0.72    | 0.007 |
| 163.                  | LP ( 1)C153 | 885. | BD*( 3) C 6- O46 | 0.06      | 1.31    | 0.008 |
| 163.                  | LP ( 1)C153 | 926. | BD*( 1) C16-Ru52 | 0.21      | 0.73    | 0.012 |
| 163.                  | LP ( 1)C153 | 928. | BD*( 1) C16- C18 | 0.12      | 1.23    | 0.011 |
| 164.                  | LP ( 2)C153 | 796. | RY*( 1)Ru52      | 0.10      | 0.09    | 0.003 |
| 164.                  | LP ( 2)C153 | 798. | RY*( 3)Ru52      | 0.27      | 0.94    | 0.014 |
| 164.                  | LP ( 2)C153 | 803. | RY*( 8)Ru52      | 0.05      | 1.32    | 0.008 |
| 164.                  | LP ( 2)C153 | 809. | RY*(14)Ru52      | 0.17      | 5.48    | 0.028 |
| 164.                  | LP ( 2)C153 | 810. | RY*(15)Ru52      | 0.13      | 6.32    | 0.026 |
| 164.                  | LP ( 2)C153 | 834. | RY*(39)Ru52      | 0.07      | 18.15   | 0.032 |
| 164.                  | LP ( 2)C153 | 838. | RY*(43)Ru52      | 0.09      | 18.86   | 0.036 |
| 164.                  | LP ( 2)C153 | 865. | BD*( 1) C12- N50 | 0.07      | 0.67    | 0.006 |
| 164.                  | LP ( 2)C153 | 879. | BD*( 2) C 8- O47 | 0.38      | 0.22    | 0.009 |
| 164.                  | LP ( 2)C153 | 882. | BD*( 1) C 6-Ru52 | 0.31      | 0.34    | 0.010 |
| 164.                  | LP ( 2)C153 | 884. | BD*( 2) C 6- O46 | 0.08      | 0.22    | 0.004 |
| 164.                  | LP ( 2)C153 | 927. | BD*( 1) C16- C22 | 0.10      | 0.73    | 0.008 |
| 164.                  | LP ( 2)C153 | 928. | BD*( 1) C16- C18 | 0.08      | 0.74    | 0.007 |
| 165.                  | LP ( 3)C153 | 167. | LP*( 1) C16      | 0.28      | 0.31    | 0.010 |
| 165.                  | LP ( 3)C153 | 243. | RY*( 1) C 6      | 0.13      | 1.88    | 0.015 |
| 165.                  | LP ( 3)C153 | 277. | RY*( 5) C 8      | 0.05      | 2.28    | 0.011 |
| 165.                  | LP ( 3)C153 | 280. | RY*( 8) C 8      | 0.07      | 4.40    | 0.017 |
| 165.                  | LP ( 3)C153 | 285. | RY*(13) C 8      | 0.06      | 3.01    | 0.014 |
| 165.                  | LP ( 3)C153 | 338. | RY*( 6) C12      | 0.06      | 3.17    | 0.013 |
| 165.                  | LP ( 3)C153 | 364. | RY*( 2) C14      | 0.09      | 0.97    | 0.009 |
| 165.                  | LP ( 3)C153 | 428. | RY*( 6) C18      | 0.06      | 2.80    | 0.013 |
| 165.                  | LP ( 3)C153 | 568. | RY*( 1) H29      | 0.13      | 1.66    | 0.014 |
| 165.                  | LP ( 3)C153 | 569. | RY*( 2) H29      | 0.06      | 2.31    | 0.012 |
| 165.                  | LP ( 3)C153 | 570. | RY*( 3) H29      | 0.65      | 1.81    | 0.034 |
| 165.                  | LP ( 3)C153 | 676. | RY*( 4) O46      | 0.10      | 0.89    | 0.009 |
| 165.                  | LP ( 3)C153 | 733. | RY*( 1) N50      | 0.10      | 1.96    | 0.013 |
| 165.                  | LP ( 3)C153 | 797. | RY*( 2)Ru52      | 0.31      | 0.86    | 0.016 |
| 165.                  | LP ( 3)C153 | 798. | RY*( 3)Ru52      | 0.50      | 1.10    | 0.023 |
| 165.                  | LP ( 3)C153 | 799. | RY*( 4)Ru52      | 1.26      | 2.11    | 0.050 |
| 165.                  | LP ( 3)C153 | 801. | RY*( 6)Ru52      | 0.41      | 1.51    | 0.024 |
| 165.                  | LP ( 3)C153 | 803. | RY*( 8)Ru52      | 0.22      | 1.48    | 0.017 |
| 165.                  | LP ( 3)C153 | 806. | RY*(11)Ru52      | 0.05      | 6.83    | 0.018 |
| 165.                  | LP ( 3)C153 | 807. | RY*(12)Ru52      | 0.17      | 7.45    | 0.034 |
| 165.                  | LP ( 3)C153 | 808. | RY*(13)Ru52      | 0.07      | 2.80    | 0.013 |
| 165.                  | LP ( 3)C153 | 810. | RY*(15)Ru52      | 0.15      | 6.47    | 0.030 |
| 165.                  | LP ( 3)C153 | 812. | RY*(17)Ru52      | 0.20      | 4.30    | 0.029 |
| 165.                  | LP ( 3)C153 | 816. | RY*(21)Ru52      | 0.07      | 13.75   | 0.029 |
| 165.                  | LP ( 3)C153 | 818. | RY*(23)Ru52      | 0.05      | 6.94    | 0.019 |
| 165.                  | LP ( 3)C153 | 826. | RY*(31)Ru52      | 0.16      | 18.35   | 0.053 |
| 165.                  | LP ( 3)C153 | 827. | RY*(32)Ru52      | 0.06      | 54.29   | 0.055 |
| 165.                  | LP ( 3)C153 | 828. | RY*(33)Ru52      | 0.06      | 155.73  | 0.097 |
| 165.                  | LP ( 3)C153 | 834. | RY*(39)Ru52      | 0.09      | 18.31   | 0.039 |
| 165.                  | LP ( 3)C153 | 838. | RY*(43)Ru52      | 0.06      | 19.02   | 0.032 |
| 165.                  | LP ( 3)C153 | 878. | BD*( 1) C 8- O47 | 0.10      | 0.38    | 0.006 |
| 165.                  | LP ( 3)C153 | 881. | BD*( 1) C 8-Ru52 | 27.65     | 0.46    | 0.101 |
| 165.                  | LP ( 3)C153 | 884. | BD*( 2) C 6- O46 | 0.21      | 0.38    | 0.008 |
| 165.                  | LP ( 3)C153 | 885. | BD*( 3) C 6- O46 | 0.16      | 0.98    | 0.012 |
| 165.                  | LP ( 3)C153 | 921. | BD*( 1) C20- N50 | 0.07      | 0.81    | 0.007 |
| 165.                  | LP ( 3)C153 | 922. | BD*( 2) C20- N50 | 0.08      | 0.35    | 0.005 |
| 165.                  | LP ( 3)C153 | 928. | BD*( 1) C16- C18 | 0.11      | 0.90    | 0.010 |
| 166.                  | LP ( 4)C153 | 167. | LP*( 1) C16      | 2.91      | 0.18    | 0.024 |
| 166.                  | LP ( 4)C153 | 243. | RY*( 1) C 6      | 0.61      | 1.76    | 0.032 |
| 166.                  | LP ( 4)C153 | 246. | RY*( 4) C 6      | 0.08      | 1.87    | 0.012 |
| 166.                  | LP ( 4)C153 | 249. | RY*( 7) C 6      | 0.16      | 6.53    | 0.031 |
| 166.                  | LP ( 4)C153 | 253. | RY*(11) C 6      | 0.12      | 2.11    | 0.016 |
| 166.                  | LP ( 4)C153 | 254. | RY*(12) C 6      | 0.05      | 2.93    | 0.012 |
| 166.                  | LP ( 4)C153 | 273. | RY*( 1) C 8      | 1.41      | 1.62    | 0.047 |
| 166.                  | LP ( 4)C153 | 279. | RY*( 7) C 8      | 0.82      | 4.61    | 0.060 |
| 166.                  | LP ( 4)C153 | 280. | RY*( 8) C 8      | 0.08      | 4.27    | 0.018 |
| 166.                  | LP ( 4)C153 | 284. | RY*(12) C 8      | 0.14      | 2.99    | 0.020 |
| 166.                  | LP ( 4)C153 | 286. | RY*(14) C 8      | 0.18      | 45.87   | 0.088 |
| 166.                  | LP ( 4)C153 | 287. | RY*(15) C 8      | 0.10      | 26.88   | 0.051 |
| 166.                  | LP ( 4)C153 | 335. | RY*( 3) C12      | 0.20      | 1.97    | 0.019 |
| 166.                  | LP ( 4)C153 | 336. | RY*( 4) C12      | 0.05      | 1.58    | 0.009 |
| 166.                  | LP ( 4)C153 | 338. | RY*( 6) C12      | 1.28      | 3.05    | 0.061 |
| 166.                  | LP ( 4)C153 | 339. | RY*( 7) C12      | 0.15      | 8.93    | 0.036 |
| 166.                  | LP ( 4)C153 | 340. | RY*( 8) C12      | 0.05      | 4.48    | 0.015 |

|                       |    |         |      |                  |           |         |       |
|-----------------------|----|---------|------|------------------|-----------|---------|-------|
| 166.                  | LP | (4)C153 | 341. | RY*(9) C12       | 0.24      | 5.05    | 0.034 |
| 166.                  | LP | (4)C153 | 342. | RY*(10) C12      | 0.09      | 2.65    | 0.015 |
| 166.                  | LP | (4)C153 | 364. | RY*(2) C14       | 0.11      | 0.85    | 0.009 |
| 166.                  | LP | (4)C153 | 373. | RY*(11) C14      | 0.08      | 2.95    | 0.015 |
| 166.                  | LP | (4)C153 | 393. | RY*(1) C16       | 0.56      | 1.31    | 0.026 |
| 166.                  | LP | (4)C153 | 394. | RY*(2) C16       | 0.39      | 0.88    | 0.018 |
| 166.                  | LP | (4)C153 | 395. | RY*(3) C16       | 0.23      | 1.24    | 0.016 |
| 166.                  | LP | (4)C153 | 404. | RY*(12) C16      | 0.11      | 3.17    | 0.018 |
| 166.                  | LP | (4)C153 | 425. | RY*(3) C18       | 0.14      | 1.92    | 0.016 |
| 166.                  | LP | (4)C153 | 426. | RY*(4) C18       | 0.06      | 1.25    | 0.009 |
| 166.                  | LP | (4)C153 | 428. | RY*(6) C18       | 0.69      | 2.67    | 0.042 |
| 166.                  | LP | (4)C153 | 429. | RY*(7) C18       | 0.16      | 8.14    | 0.035 |
| 166.                  | LP | (4)C153 | 454. | RY*(2) C20       | 0.07      | 0.87    | 0.007 |
| 166.                  | LP | (4)C153 | 459. | RY*(7) C20       | 0.18      | 3.62    | 0.025 |
| 166.                  | LP | (4)C153 | 462. | RY*(10) C20      | 0.08      | 3.80    | 0.017 |
| 166.                  | LP | (4)C153 | 487. | RY*(5) C22       | 0.20      | 3.88    | 0.027 |
| 166.                  | LP | (4)C153 | 522. | RY*(10) C24      | 0.08      | 3.90    | 0.017 |
| 166.                  | LP | (4)C153 | 568. | RY*(1) H29       | 0.40      | 1.53    | 0.024 |
| 166.                  | LP | (4)C153 | 569. | RY*(2) H29       | 0.10      | 2.19    | 0.014 |
| 166.                  | LP | (4)C153 | 570. | RY*(3) H29       | 0.46      | 1.69    | 0.027 |
| 166.                  | LP | (4)C153 | 571. | RY*(4) H29       | 0.22      | 1.90    | 0.020 |
| 166.                  | LP | (4)C153 | 572. | RY*(5) H29       | 0.10      | 3.69    | 0.019 |
| 166.                  | LP | (4)C153 | 580. | RY*(3) H31       | 0.11      | 1.37    | 0.012 |
| 166.                  | LP | (4)C153 | 610. | RY*(3) H37       | 0.17      | 1.32    | 0.014 |
| 166.                  | LP | (4)C153 | 615. | RY*(3) H38       | 0.05      | 1.88    | 0.009 |
| 166.                  | LP | (4)C153 | 625. | RY*(3) H40       | 0.13      | 1.57    | 0.014 |
| 166.                  | LP | (4)C153 | 675. | RY*(3) O46       | 0.09      | 2.12    | 0.013 |
| 166.                  | LP | (4)C153 | 676. | RY*(4) O46       | 0.63      | 0.76    | 0.021 |
| 166.                  | LP | (4)C153 | 677. | RY*(5) O46       | 0.10      | 2.21    | 0.015 |
| 166.                  | LP | (4)C153 | 680. | RY*(8) O46       | 0.11      | 2.16    | 0.015 |
| 166.                  | LP | (4)C153 | 690. | RY*(3) O47       | 0.07      | 1.96    | 0.011 |
| 166.                  | LP | (4)C153 | 691. | RY*(4) O47       | 0.79      | 0.71    | 0.023 |
| 166.                  | LP | (4)C153 | 692. | RY*(5) O47       | 0.20      | 2.45    | 0.022 |
| 166.                  | LP | (4)C153 | 733. | RY*(1) N50       | 0.64      | 1.83    | 0.033 |
| 166.                  | LP | (4)C153 | 735. | RY*(3) N50       | 0.22      | 2.39    | 0.022 |
| 166.                  | LP | (4)C153 | 796. | RY*(1) Ru52      | 149.24    | 0.12    | 0.130 |
| 166.                  | LP | (4)C153 | 797. | RY*(2) Ru52      | 20.21     | 0.73    | 0.119 |
| 166.                  | LP | (4)C153 | 798. | RY*(3) Ru52      | 5.36      | 0.97    | 0.070 |
| 166.                  | LP | (4)C153 | 799. | RY*(4) Ru52      | 1.24      | 1.99    | 0.048 |
| 166.                  | LP | (4)C153 | 800. | RY*(5) Ru52      | 1.12      | 3.28    | 0.059 |
| 166.                  | LP | (4)C153 | 801. | RY*(6) Ru52      | 1.49      | 1.39    | 0.044 |
| 166.                  | LP | (4)C153 | 803. | RY*(8) Ru52      | 5.04      | 1.35    | 0.081 |
| 166.                  | LP | (4)C153 | 806. | RY*(11) Ru52     | 0.07      | 6.70    | 0.021 |
| 166.                  | LP | (4)C153 | 807. | RY*(12) Ru52     | 1.71      | 7.32    | 0.109 |
| 166.                  | LP | (4)C153 | 808. | RY*(13) Ru52     | 0.36      | 2.68    | 0.030 |
| 166.                  | LP | (4)C153 | 809. | RY*(14) Ru52     | 0.79      | 5.51    | 0.064 |
| 166.                  | LP | (4)C153 | 810. | RY*(15) Ru52     | 0.63      | 6.35    | 0.062 |
| 166.                  | LP | (4)C153 | 811. | RY*(16) Ru52     | 0.15      | 6.28    | 0.030 |
| 166.                  | LP | (4)C153 | 812. | RY*(17) Ru52     | 5.50      | 4.17    | 0.148 |
| 166.                  | LP | (4)C153 | 814. | RY*(19) Ru52     | 0.97      | 5.45    | 0.071 |
| 166.                  | LP | (4)C153 | 816. | RY*(21) Ru52     | 0.23      | 13.63   | 0.055 |
| 166.                  | LP | (4)C153 | 817. | RY*(22) Ru52     | 0.37      | 9.44    | 0.058 |
| 166.                  | LP | (4)C153 | 818. | RY*(23) Ru52     | 2.44      | 6.81    | 0.126 |
| 166.                  | LP | (4)C153 | 819. | RY*(24) Ru52     | 1.9429463 | 6.1     | 7.387 |
| 166.                  | LP | (4)C153 | 820. | RY*(25) Ru52     | 4.25      | 765.33  | 1.761 |
| 166.                  | LP | (4)C153 | 821. | RY*(26) Ru52     | 3.5412899 | 6.0     | 6.602 |
| 166.                  | LP | (4)C153 | 822. | RY*(27) Ru52     | 0.26      | 49.50   | 0.112 |
| 166.                  | LP | (4)C153 | 823. | RY*(28) Ru52     | 0.16      | 186.38  | 0.170 |
| 166.                  | LP | (4)C153 | 826. | RY*(31) Ru52     | 0.15      | 18.22   | 0.052 |
| 166.                  | LP | (4)C153 | 827. | RY*(32) Ru52     | 0.09      | 54.17   | 0.070 |
| 166.                  | LP | (4)C153 | 829. | RY*(34) Ru52     | 0.06      | 49.93   | 0.055 |
| 166.                  | LP | (4)C153 | 830. | RY*(35) Ru52     | 0.15      | 18.37   | 0.051 |
| 166.                  | LP | (4)C153 | 831. | RY*(36) Ru52     | 0.08      | 54.13   | 0.066 |
| 166.                  | LP | (4)C153 | 833. | RY*(38) Ru52     | 4.16      | 3361.68 | 3.652 |
| 166.                  | LP | (4)C153 | 835. | RY*(40) Ru52     | 0.11      | 54.19   | 0.076 |
| 166.                  | LP | (4)C153 | 836. | RY*(41) Ru52     | 2.53      | 776.97  | 1.371 |
| 166.                  | LP | (4)C153 | 837. | RY*(42) Ru52     | 1.60      | 3154.71 | 2.194 |
| 166.                  | LP | (4)C153 | 865. | BD*(1) C12- N50  | 0.21      | 0.70    | 0.012 |
| 166.                  | LP | (4)C153 | 881. | BD*(1) C 8- Ru52 | 54.45     | 0.33    | 0.121 |
| 166.                  | LP | (4)C153 | 882. | BD*(1) C 6- Ru52 | 0.12      | 0.37    | 0.006 |
| 166.                  | LP | (4)C153 | 883. | BD*(1) C 6- O46  | 0.42      | 0.27    | 0.010 |
| 166.                  | LP | (4)C153 | 884. | BD*(2) C 6- O46  | 0.35      | 0.25    | 0.009 |
| 166.                  | LP | (4)C153 | 885. | BD*(3) C 6- O46  | 0.48      | 0.86    | 0.020 |
| 166.                  | LP | (4)C153 | 922. | BD*(2) C20- N50  | 0.22      | 0.22    | 0.007 |
| 166.                  | LP | (4)C153 | 923. | BD*(1) C20- C23  | 0.09      | 0.73    | 0.008 |
| 166.                  | LP | (4)C153 | 925. | BD*(1) C22- C25  | 0.07      | 0.75    | 0.007 |
| 166.                  | LP | (4)C153 | 926. | BD*(1) C16- Ru52 | 0.88      | 0.27    | 0.014 |
| 166.                  | LP | (4)C153 | 928. | BD*(1) C16- C18  | 0.28      | 0.77    | 0.014 |
| from unit 4 to unit 3 |    |         |      |                  |           |         |       |
| 163.                  | LP | (1)C153 | 640. | RY*(3) H43       | 0.18      | 2.81    | 0.020 |
| 165.                  | LP | (3)C153 | 638. | RY*(1) H43       | 0.35      | 1.90    | 0.025 |
| 165.                  | LP | (3)C153 | 640. | RY*(3) H43       | 1.07      | 2.48    | 0.050 |
| 165.                  | LP | (3)C153 | 642. | RY*(5) H43       | 0.09      | 2.84    | 0.015 |
| 165.                  | LP | (3)C153 | 660. | RY*(3) O45       | 0.10      | 2.52    | 0.015 |
| 165.                  | LP | (3)C153 | 662. | RY*(5) O45       | 0.41      | 2.63    | 0.032 |
| 165.                  | LP | (3)C153 | 667. | RY*(10) O45      | 0.07      | 5.25    | 0.018 |
| 165.                  | LP | (3)C153 | 668. | RY*(11) O45      | 0.05      | 5.52    | 0.017 |
| 165.                  | LP | (3)C153 | 934. | BD*(1) H43- O45  | 0.09      | 0.85    | 0.008 |
| 166.                  | LP | (4)C153 | 638. | RY*(1) H43       | 1.49      | 1.78    | 0.050 |
| 166.                  | LP | (4)C153 | 641. | RY*(4) H43       | 0.23      | 2.88    | 0.025 |
| 166.                  | LP | (4)C153 | 642. | RY*(5) H43       | 0.37      | 2.71    | 0.031 |
| 166.                  | LP | (4)C153 | 658. | RY*(1) O45       | 0.28      | 2.63    | 0.026 |
| 166.                  | LP | (4)C153 | 659. | RY*(2) O45       | 0.50      | 1.78    | 0.029 |
| 166.                  | LP | (4)C153 | 661. | RY*(4) O45       | 0.22      | 4.15    | 0.030 |
| 166.                  | LP | (4)C153 | 662. | RY*(5) O45       | 0.53      | 2.51    | 0.036 |
| 166.                  | LP | (4)C153 | 663. | RY*(6) O45       | 0.05      | 2.90    | 0.012 |
| 166.                  | LP | (4)C153 | 664. | RY*(7) O45       | 0.11      | 2.49    | 0.016 |
| 166.                  | LP | (4)C153 | 666. | RY*(9) O45       | 0.09      | 2.61    | 0.015 |
| 166.                  | LP | (4)C153 | 668. | RY*(11) O45      | 0.39      | 5.39    | 0.045 |
| 166.                  | LP | (4)C153 | 671. | RY*(14) O45      | 0.06      | 4.91    | 0.017 |
| 166.                  | LP | (4)C153 | 934. | BD*(1) H43- O45  | 0.07      | 0.72    | 0.007 |
| within unit 4         |    |         |      |                  |           |         |       |
| 165.                  | LP | (3)C153 | 847. | RY*(4) C153      | 2.74      | 2.80    | 0.085 |
| 165.                  | LP | (3)C153 | 850. | RY*(7) C153      | 1.55      | 4.07    | 0.077 |
| 165.                  | LP | (3)C153 | 852. | RY*(9) C153      | 0.57      | 2.10    | 0.034 |
| 165.                  | LP | (3)C153 | 853. | RY*(10) C153     | 1.26      | 4.96    | 0.077 |
| 166.                  | LP | (4)C153 | 845. | RY*(2) C153      | 0.55      | 1.21    | 0.025 |
| 166.                  | LP | (4)C153 | 846. | RY*(3) C153      | 3.27      | 6.31    | 0.140 |
| 166.                  | LP | (4)C153 | 847. | RY*(4) C153      | 1.83      | 2.67    | 0.068 |
| 166.                  | LP | (4)C153 | 848. | RY*(5) C153      | 3.87      | 6.77    | 0.158 |
| 166.                  | LP | (4)C153 | 849. | RY*(6) C153      | 0.96      | 1.55    | 0.038 |
| 166.                  | LP | (4)C153 | 853. | RY*(10) C153     | 0.78      | 4.83    | 0.060 |

Electronic Supplementary Information for Dalton Transactions  
This journal is © The Royal Society of Chemistry 2009

NATURAL BOND ORBITALS (Summary):

| NBO            |                   | Occupancy | Energy   | Principal Delocalizations<br>(geminal,vicinal,remote)                                                                                                                                                                                                                                                                                                                                                                                                                                                                                                                                                                                                                                                                                                                                                                                                                                                                                                                                                                                                                                                                                                 |
|----------------|-------------------|-----------|----------|-------------------------------------------------------------------------------------------------------------------------------------------------------------------------------------------------------------------------------------------------------------------------------------------------------------------------------------------------------------------------------------------------------------------------------------------------------------------------------------------------------------------------------------------------------------------------------------------------------------------------------------------------------------------------------------------------------------------------------------------------------------------------------------------------------------------------------------------------------------------------------------------------------------------------------------------------------------------------------------------------------------------------------------------------------------------------------------------------------------------------------------------------------|
| Molecular unit | 1 (C13H8NO2Ru)    |           |          |                                                                                                                                                                                                                                                                                                                                                                                                                                                                                                                                                                                                                                                                                                                                                                                                                                                                                                                                                                                                                                                                                                                                                       |
| 1.             | BD (1) C 1- C 2   | 1.98282   | -0.66149 | 805 (r), 875 (v), 718 (v), 199 (v)<br>886 (g), 776 (r), 748 (r), 755 (r)<br>780 (r), 777 (r), 767 (r), 913 (r)<br>890 (g), 759 (r), 847 (r), 848 (r)<br>825 (r), 846 (r), 638 (r), 640 (r)<br>815 (r), 570 (r), 853 (r)                                                                                                                                                                                                                                                                                                                                                                                                                                                                                                                                                                                                                                                                                                                                                                                                                                                                                                                               |
| 2.             | BD (2) C 1- C 2   | 1.63590   | -0.25227 | 874 (v), 893 (v), 200 (v), 719 (v)<br>888 (g), 805 (r), 884 (r)                                                                                                                                                                                                                                                                                                                                                                                                                                                                                                                                                                                                                                                                                                                                                                                                                                                                                                                                                                                                                                                                                       |
| 3.             | BD (1) C 1- C 3   | 1.98475   | -0.65640 | 877 (v), 891 (v), 805 (r), 230 (v)<br>873 (g), 887 (g)                                                                                                                                                                                                                                                                                                                                                                                                                                                                                                                                                                                                                                                                                                                                                                                                                                                                                                                                                                                                                                                                                                |
| 4.             | BD (1) C 1- H 42  | 1.97639   | -0.48911 | 890 (v), 873 (v), 198 (v), 183 (v)<br>796 (r), 797 (r)                                                                                                                                                                                                                                                                                                                                                                                                                                                                                                                                                                                                                                                                                                                                                                                                                                                                                                                                                                                                                                                                                                |
| 5.             | BD (1) C 2- H 27  | 1.97198   | -0.47982 | 805 (r), 892 (v), 886 (v), 718 (v)<br>755 (r), 168 (v), 759 (r), 748 (r)<br>757 (r), 767 (r), 776 (r), 825 (r)<br>780 (r), 764 (r), 777 (r), 785 (r)<br>847 (r), 848 (r), 815 (r), 846 (r)<br>640 (r), 884 (r), 638 (r), 570 (r)<br>824 (r), 833 (r), 799 (r), 820 (r)<br>661 (r), 821 (r), 811 (r), 845 (r)<br>836 (r), 659 (r)                                                                                                                                                                                                                                                                                                                                                                                                                                                                                                                                                                                                                                                                                                                                                                                                                      |
| 6.             | BD (1) C 2- N 49  | 1.98610   | -0.77398 | 805 (r), 913 (r), 759 (r), 755 (r)<br>894 (v), 757 (r), 767 (r), 776 (r)<br>780 (r), 748 (r), 260 (v), 764 (r)<br>785 (r), 777 (r), 889 (v), 762 (r)<br>760 (r), 721 (g), 772 (r), 789 (r)<br>188 (g), 750 (r), 761 (r), 197 (g)<br>170 (v), 848 (r), 887 (g), 258 (v)<br>773 (r), 293 (r), 763 (r), 892 (g)<br>196 (g), 189 (g), 825 (r), 219 (r)<br>754 (r), 720 (g), 847 (r), 846 (r)<br>851 (r), 640 (r), 853 (r), 570 (r)<br>638 (r), 661 (r), 815 (r), 796 (r)<br>856 (r), 852 (r), 813 (r), 665 (r)<br>338 (r), 799 (r), 659 (r), 797 (r)<br>854 (r), 811 (r), 845 (r), 569 (r)<br>833 (r), 662 (r)                                                                                                                                                                                                                                                                                                                                                                                                                                                                                                                                            |
| 7.             | BD (1) C 3- C 5   | 1.98395   | -0.66314 | 894 (v), 805 (r), 889 (v), 876 (g)<br>170 (v), 886 (g), 258 (v)                                                                                                                                                                                                                                                                                                                                                                                                                                                                                                                                                                                                                                                                                                                                                                                                                                                                                                                                                                                                                                                                                       |
| 8.             | BD (2) C 3- C 5   | 1.66321   | -0.25308 | 893 (v), 888 (v), 169 (v), 263 (v)                                                                                                                                                                                                                                                                                                                                                                                                                                                                                                                                                                                                                                                                                                                                                                                                                                                                                                                                                                                                                                                                                                                    |
| 9.             | BD (1) C 3- H 41  | 1.97843   | -0.49266 | 876 (v), 887 (v), 228 (v), 168 (v)<br>805 (r)                                                                                                                                                                                                                                                                                                                                                                                                                                                                                                                                                                                                                                                                                                                                                                                                                                                                                                                                                                                                                                                                                                         |
| 10.            | BD (1) C 4- O 44  | 1.99744   | -0.38779 | 796 (r), 825 (r), 797 (r), 815 (r)<br>833 (r), 814 (r), 824 (r), 820 (r)<br>821 (r), 801 (r), 840 (r)                                                                                                                                                                                                                                                                                                                                                                                                                                                                                                                                                                                                                                                                                                                                                                                                                                                                                                                                                                                                                                                 |
| 11.            | BD (2) C 4- O 44  | 1.99744   | -0.38616 | 748 (v), 750 (v), 776 (v), 767 (v)                                                                                                                                                                                                                                                                                                                                                                                                                                                                                                                                                                                                                                                                                                                                                                                                                                                                                                                                                                                                                                                                                                                    |
| 12.            | BD (3) C 4- O 44  | 1.99514   | -1.07776 | 780 (v), 805 (r), 213 (g), 752 (v)<br>755 (v), 777 (v), 785 (v), 763 (v)<br>762 (v), 757 (v), 764 (v), 772 (v)<br>789 (v), 219 (g), 759 (v), 770 (v)<br>760 (v), 773 (v), 766 (v), 847 (r)<br>848 (r), 383 (r), 765 (v), 188 (r)<br>646 (g), 640 (r), 788 (v), 846 (r)<br>303 (r), 761 (v), 768 (v), 638 (r)<br>220 (g), 570 (r), 706 (r), 754 (v)<br>293 (r), 264 (r), 796 (r), 645 (g)<br>718 (r), 309 (r), 825 (r), 318 (r)<br>853 (r), 215 (g), 214 (g), 329 (r)<br>662 (r), 310 (r), 321 (r), 319 (r)<br>774 (v), 707 (r), 384 (r), 769 (v)<br>792 (v), 330 (r), 221 (g), 705 (r)<br>815 (r), 726 (r), 595 (r), 315 (r)<br>288 (r), 224 (g), 630 (r), 647 (g)<br>227 (g), 568 (r), 338 (r), 793 (v)<br>642 (r), 189 (r), 326 (r), 749 (v)<br>799 (r), 721 (r), 775 (v), 668 (r)<br>856 (r), 658 (r), 813 (r), 641 (r)<br>669 (r), 851 (r), 667 (r), 364 (r)<br>845 (r), 804 (r), 797 (r), 660 (r)<br>811 (r), 661 (r), 569 (r), 800 (r)<br>659 (r), 854 (r), 285 (r), 663 (r)<br>734 (r), 665 (r), 373 (r), 735 (r)<br>666 (r), 341 (r), 855 (r), 849 (r)<br>812 (r), 844 (r), 344 (r), 393 (r)<br>809 (r), 816 (r), 833 (r), 255 (r)<br>396 (r) |
| 13.            | BD (1) C 4- Ru 51 | 1.91955   | -0.53020 | 902 (g), 913 (g), 718 (r), 805 (r)<br>305 (v), 912 (g), 304 (v), 796 (r)<br>213 (g), 914 (v), 645 (v), 916 (v)<br>318 (v), 219 (g), 759 (g), 660 (r)<br>915 (v), 754 (g), 847 (r), 706 (r)<br>756 (g), 848 (r), 750 (g), 911 (g)<br>892 (r), 900 (v), 767 (g), 777 (g)<br>658 (r), 317 (v), 748 (g), 768 (g)<br>890 (r), 757 (g), 846 (r), 901 (v)<br>897 (v), 764 (g), 640 (r), 799 (r)<br>667 (r), 570 (r), 663 (r), 666 (r)<br>642 (r), 825 (r), 845 (r), 849 (r)<br>638 (r), 672 (r), 853 (r), 338 (r)<br>881 (r), 364 (r), 668 (r), 926 (r)<br>659 (r), 664 (r), 641 (r), 801 (r)<br>661 (r), 669 (r), 860 (r), 856 (r)<br>800 (r), 816 (r), 815 (r), 834 (r)<br>858 (r)                                                                                                                                                                                                                                                                                                                                                                                                                                                                         |
| 14.            | BD (1) C 5- C 7   | 1.97942   | -0.65297 | 805 (r), 875 (v), 897 (v), 199 (v)<br>894 (g), 873 (g), 290 (v), 718 (v)<br>913 (r), 892 (g), 848 (r), 847 (v)                                                                                                                                                                                                                                                                                                                                                                                                                                                                                                                                                                                                                                                                                                                                                                                                                                                                                                                                                                                                                                        |
| 15.            | BD (1) C 5- H 28  | 1.97434   | -0.49079 | 892 (v), 886 (v), 258 (v), 198 (v)<br>805 (r)                                                                                                                                                                                                                                                                                                                                                                                                                                                                                                                                                                                                                                                                                                                                                                                                                                                                                                                                                                                                                                                                                                         |
| 20.            | BD (1) C 7- C 9   | 1.97250   | -0.60140 | 890 (v), 900 (v), 898 (v), 873 (v)<br>897 (g), 318 (v), 876 (g), 718 (v)<br>348 (v), 895 (g), 228 (v), 754 (r)<br>354 (v), 805 (r), 847 (r), 848 (r)<br>845 (r), 853 (r)                                                                                                                                                                                                                                                                                                                                                                                                                                                                                                                                                                                                                                                                                                                                                                                                                                                                                                                                                                              |
| 21.            | BD (1) C 7- N 49  | 1.98200   | -0.75815 | 913 (r), 185 (v), 895 (v), 891 (v)<br>877 (v), 759 (r), 750 (r), 272 (g)<br>754 (r), 876 (g), 825 (r), 720 (g)<br>762 (r), 749 (r), 796 (r), 271 (g)<br>776 (r), 767 (r), 780 (r), 265 (g)                                                                                                                                                                                                                                                                                                                                                                                                                                                                                                                                                                                                                                                                                                                                                                                                                                                                                                                                                            |

|                        |         |          |  |                                    |
|------------------------|---------|----------|--|------------------------------------|
|                        |         |          |  | 894 (g), 777 (x), 757 (x), 233 (v) |
|                        |         |          |  | 288 (v), 291 (v), 755 (x), 785 (x) |
|                        |         |          |  | 748 (x), 764 (x), 268 (g), 235 (v) |
|                        |         |          |  | 805 (x), 847 (x), 848 (x), 853 (x) |
|                        |         |          |  | 797 (x), 824 (x), 815 (x), 638 (x) |
|                        |         |          |  | 570 (x), 846 (x), 845 (x), 833 (x) |
|                        |         |          |  | 820 (x), 818 (x), 568 (x), 662 (x) |
|                        |         |          |  | 821 (x), 798 (x)                   |
| 22. BD ( 2) C 7- N 49  | 1.72309 | -0.29832 |  | 888 (v), 896 (v), 874 (v), 805 (x) |
|                        |         |          |  | 184 (v), 229 (v), 289 (v), 796 (x) |
|                        |         |          |  | 825 (x), 853 (x), 850 (x), 861 (x) |
|                        |         |          |  | 860 (x), 858 (x), 852 (x), 846 (x) |
|                        |         |          |  | 803 (x), 798 (x), 818 (x)          |
| 27. BD ( 1) C 9- C 11  | 1.97155 | -0.60703 |  | 876 (v), 908 (v), 899 (v), 895 (g) |
|                        |         |          |  | 380 (v), 750 (v), 767 (v), 757 (v) |
|                        |         |          |  | 754 (v), 776 (v), 759 (v), 780 (v) |
|                        |         |          |  | 894 (g), 302 (g), 351 (v), 796 (x) |
|                        |         |          |  | 296 (g), 748 (v), 749 (v), 777 (v) |
|                        |         |          |  | 258 (v), 318 (g), 301 (g), 762 (v) |
|                        |         |          |  | 761 (v), 293 (g), 785 (v), 755 (v) |
|                        |         |          |  | 805 (x), 350 (v), 763 (v), 378 (v) |
|                        |         |          |  | 290 (g), 764 (v), 772 (v), 760 (v) |
|                        |         |          |  | 355 (v), 789 (v), 900 (g), 354 (v) |
|                        |         |          |  | 781 (v), 848 (x), 847 (x), 853 (x) |
|                        |         |          |  | 640 (x), 797 (x), 825 (x), 846 (x) |
|                        |         |          |  | 570 (x), 638 (x), 851 (x), 668 (x) |
|                        |         |          |  | 845 (x), 568 (x), 856 (x), 852 (x) |
|                        |         |          |  | 658 (x)                            |
| 28. BD ( 1) C 9- C 13  | 1.97418 | -0.62243 |  | 902 (v), 892 (v), 905 (v), 897 (g) |
|                        |         |          |  | 410 (v), 260 (v), 898 (g), 894 (g) |
|                        |         |          |  | 320 (v)                            |
| 29. BD ( 2) C 9- C 13  | 1.62982 | -0.22035 |  | 893 (v), 901 (v), 904 (v), 409 (v) |
|                        |         |          |  | 319 (v), 289 (g), 262 (v), 796 (x) |
| 30. BD ( 1) C 10- O 48 | 1.99651 | -0.39227 |  | 805 (x), 853 (x), 847 (x), 861 (x) |
| 31. BD ( 2) C 10- O 48 | 1.99560 | -0.39770 |  | 805 (x), 796 (x), 334 (x), 853 (x) |
|                        |         |          |  | 640 (x), 336 (x), 570 (x), 847 (x) |
|                        |         |          |  | 797 (x), 864 (x), 347 (x), 364 (x) |
|                        |         |          |  | 856 (x)                            |
| 32. BD ( 3) C 10- O 48 | 1.99463 | -1.06911 |  | 748 (v), 750 (v), 776 (v), 767 (v) |
|                        |         |          |  | 780 (v), 757 (v), 752 (v), 785 (v) |
|                        |         |          |  | 303 (g), 777 (v), 755 (v), 764 (v) |
|                        |         |          |  | 762 (v), 772 (v), 789 (v), 770 (v) |
|                        |         |          |  | 763 (v), 766 (v), 760 (v), 768 (v) |
|                        |         |          |  | 309 (g), 773 (v), 759 (v), 847 (x) |
|                        |         |          |  | 753 (v), 848 (x), 219 (x), 805 (x) |
|                        |         |          |  | 383 (x), 846 (x), 213 (x), 796 (x) |
|                        |         |          |  | 765 (v), 788 (v), 640 (x), 188 (x) |
|                        |         |          |  | 638 (x), 646 (x), 305 (g), 705 (g) |
|                        |         |          |  | 310 (g), 570 (x), 706 (g), 761 (v) |
|                        |         |          |  | 853 (x), 318 (x), 751 (v), 264 (x) |
|                        |         |          |  | 293 (x), 647 (x), 329 (x), 319 (x) |
|                        |         |          |  | 662 (x), 797 (x), 718 (x), 384 (x) |
|                        |         |          |  | 781 (v), 288 (x), 568 (x), 595 (x) |
|                        |         |          |  | 317 (g), 825 (x), 330 (x), 316 (g) |
|                        |         |          |  | 338 (x), 321 (x), 380 (x), 726 (x) |
|                        |         |          |  | 642 (x), 630 (x), 668 (x), 856 (x) |
|                        |         |          |  | 660 (x), 641 (x), 845 (x), 813 (x) |
|                        |         |          |  | 799 (x), 658 (x), 569 (x), 814 (x) |
|                        |         |          |  | 800 (x), 336 (x), 851 (x), 364 (x) |
|                        |         |          |  | 667 (x), 669 (x), 661 (x), 734 (x) |
|                        |         |          |  | 824 (x), 804 (x), 341 (x), 665 (x) |
|                        |         |          |  | 344 (x), 844 (x), 666 (x), 285 (x) |
|                        |         |          |  | 854 (x), 855 (x), 663 (x), 279 (x) |
|                        |         |          |  | 255 (x), 373 (x), 798 (x), 809 (x) |
|                        |         |          |  | 818 (x), 740 (x), 852 (x), 735 (x) |
|                        |         |          |  | 393 (x), 745 (x), 273 (x), 580 (x) |
|                        |         |          |  | 834 (x), 343 (x), 334 (x), 253 (x) |
|                        |         |          |  | 664 (x), 811 (x), 671 (x), 457 (x) |
| 33. BD ( 1) C 10-Ru 51 | 1.92613 | -0.53610 |  | 902 (g), 912 (g), 805 (x), 705 (v) |
|                        |         |          |  | 318 (v), 910 (v), 660 (x), 897 (v) |
|                        |         |          |  | 215 (v), 911 (v), 303 (g), 913 (g) |
|                        |         |          |  | 658 (x), 796 (x), 850 (x), 721 (x) |
|                        |         |          |  | 916 (g), 309 (g), 588 (x), 715 (v) |
|                        |         |          |  | 288 (x), 849 (x), 846 (x), 334 (x) |
|                        |         |          |  | 848 (x), 661 (x), 659 (x), 881 (x) |
|                        |         |          |  | 804 (x), 801 (x), 860 (x), 803 (x) |
|                        |         |          |  | 799 (x), 926 (x), 664 (x), 847 (x) |
|                        |         |          |  | 861 (x), 858 (x), 669 (x), 667 (x) |
|                        |         |          |  | 845 (x), 672 (x), 662 (x), 853 (x) |
|                        |         |          |  | 336 (x), 812 (x), 641 (x), 817 (x) |
|                        |         |          |  | 639 (x), 798 (x), 825 (x), 864 (x) |
|                        |         |          |  | 882 (x), 863 (x), 670 (x), 840 (x) |
|                        |         |          |  | 663 (x)                            |
| 34. BD ( 1) C 11- C 15 | 1.97955 | -0.61437 |  | 805 (x), 748 (v), 750 (v), 752 (v) |
|                        |         |          |  | 767 (v), 776 (v), 780 (v), 757 (v) |
|                        |         |          |  | 777 (v), 894 (v), 785 (v), 759 (v) |
|                        |         |          |  | 763 (v), 762 (v), 768 (v), 321 (g) |
|                        |         |          |  | 772 (v), 847 (x), 789 (v), 383 (g) |
|                        |         |          |  | 764 (v), 906 (v), 760 (v), 288 (v) |
|                        |         |          |  | 755 (v), 766 (v), 758 (v), 773 (v) |
|                        |         |          |  | 219 (x), 753 (v), 754 (v), 440 (v) |
|                        |         |          |  | 290 (v), 213 (x), 907 (g), 303 (x) |
|                        |         |          |  | 318 (g), 848 (x), 853 (x), 788 (v) |
|                        |         |          |  | 326 (g), 264 (x), 646 (x), 770 (v) |
|                        |         |          |  | 761 (v), 796 (x), 846 (x), 384 (g) |
|                        |         |          |  | 380 (g), 908 (g), 570 (x), 638 (x) |
|                        |         |          |  | 320 (g), 188 (g), 592 (v), 640 (x) |
|                        |         |          |  | 391 (g), 897 (g), 381 (g), 392 (g) |
|                        |         |          |  | 391 (g), 706 (x), 589 (v), 441 (v) |
|                        |         |          |  | 588 (v), 799 (x), 856 (x), 338 (x) |
|                        |         |          |  | 662 (x), 799 (x), 856 (x), 851 (x) |
|                        |         |          |  | 659 (x), 568 (x), 845 (x), 851 (x) |
|                        |         |          |  | 659 (x), 813 (x), 640 (x), 661 (x) |
|                        |         |          |  | 364 (x), 642 (x), 569 (x), 815 (x) |
|                        |         |          |  | 825 (x), 861 (x), 855 (x), 665 (x) |
|                        |         |          |  | 852 (x), 253 (x), 804 (x)          |
| 35. BD ( 2) C 11- C 15 | 1.60134 | -0.21004 |  | 904 (v), 896 (v), 289 (v), 439 (v) |
|                        |         |          |  | 912 (v), 796 (x), 319 (g), 853 (x) |
|                        |         |          |  | 797 (x), 861 (x), 860 (x), 850 (x) |
| 36. BD ( 1) C 11-Ru 51 | 1.85393 | -0.36055 |  | 913 (g), 912 (g), 895 (v), 907 (v) |
|                        |         |          |  | 718 (x), 305 (v), 902 (v), 909 (v) |
|                        |         |          |  | 915 (v), 890 (x), 916 (v), 805 (x) |
|                        |         |          |  | 908 (v), 378 (x), 304 (v), 288 (v) |
|                        |         |          |  | 876 (x), 661 (x), 914 (v), 894 (v) |
|                        |         |          |  | 911 (v), 380 (v), 658 (x), 672 (x) |
|                        |         |          |  | 849 (x), 670 (x), 660 (x), 850 (x) |
|                        |         |          |  | 926 (x), 845 (x), 852 (x), 853 (x) |



|                        |         |            |  |                                    |
|------------------------|---------|------------|--|------------------------------------|
|                        |         |            |  | 802 (r), 659 (r), 860 (r), 861 (r) |
|                        |         |            |  | 639 (r), 394 (r)                   |
| 41. BD ( 1) C 13- C 17 | 1.98340 | -0.63110   |  | 894 (v), 906 (v), 895 (g), 440 (v) |
|                        |         |            |  | 903 (g), 288 (v), 805 (r)          |
| 42. BD ( 1) C 13- H 30 | 1.97486 | -0.46918   |  | 897 (v), 903 (v), 288 (v), 408 (v) |
|                        |         |            |  | 805 (r)                            |
| 45. BD ( 1) C 15- C 19 | 1.97849 | -0.62129   |  | 805 (r), 902 (v), 905 (v), 900 (g) |
|                        |         |            |  | 318 (v), 410 (v), 903 (g), 748 (r) |
|                        |         |            |  | 750 (r), 776 (r), 780 (r), 847 (r) |
|                        |         |            |  | 848 (r), 640 (r), 846 (r), 570 (r) |
|                        |         |            |  | 796 (r), 853 (r), 638 (r)          |
| 46. BD ( 1) C 15- H 33 | 1.97496 | -0.44868   |  | 897 (v), 903 (v), 318 (v), 438 (v) |
|                        |         |            |  | 444 (v), 847 (r), 848 (r), 805 (r) |
|                        |         |            |  | 846 (r), 825 (r), 660 (r)          |
| 50. BD ( 1) C 17- C 19 | 1.98463 | -0.62317   |  | 899 (v), 908 (v), 350 (v), 898 (g) |
|                        |         |            |  | 805 (r), 907 (g), 381 (v)          |
| 51. BD ( 2) C 17- C 19 | 1.64105 | -0.22032   |  | 896 (v), 901 (v), 379 (v), 349 (v) |
|                        |         |            |  | 352 (v)                            |
| 52. BD ( 1) C 17- H 34 | 1.97742 | -0.46239   |  | 895 (v), 907 (v), 348 (v), 438 (v) |
| 56. BD ( 1) C 19- H 35 | 1.97665 | -0.45949   |  | 900 (v), 898 (v), 408 (v), 378 (v) |
|                        |         |            |  | 805 (r)                            |
| 73. CR ( 1) C 1        | 1.99935 | -9.79348   |  | 199 (v), 186 (v), 890 (v)          |
| 74. CR ( 1) C 2        | 1.99935 | -9.82635   |  | 892 (v), 168 (v), 170 (v)          |
| 75. CR ( 1) C 3        | 1.99938 | -9.80296   |  | 170 (v), 230 (v), 876 (v)          |
| 76. CR ( 1) C 4        | 1.99944 | -9.90041   |  | 646 (v)                            |
| 77. CR ( 1) C 5        | 1.99929 | -9.79437   |  | 199 (v), 260 (v), 894 (v), 892 (v) |
| 79. CR ( 1) C 7        | 1.99926 | -9.83495   |  | 890 (v), 897 (v), 895 (v), 228 (v) |
|                        |         |            |  | 288 (v), 720 (v)                   |
| 81. CR ( 1) C 9        | 1.99918 | -9.77502   |  | 320 (v), 876 (v), 902 (v), 350 (v) |
|                        |         |            |  | 258 (v), 348 (v), 892 (v)          |
| 82. CR ( 1) C 10       | 1.99946 | -9.89518   |  | 706 (v)                            |
| 83. CR ( 1) C 11       | 1.99907 | -9.78103   |  | 380 (v), 290 (v), 895 (v), 894 (v) |
|                        |         |            |  | 907 (v), 902 (g), 288 (v)          |
| 85. CR ( 1) C 13       | 1.99930 | -9.77276   |  | 410 (v), 897 (v), 290 (v), 894 (v) |
| 87. CR ( 1) C 15       | 1.99930 | -9.75985   |  | 902 (v), 440 (v), 320 (v), 321 (v) |
| 89. CR ( 1) C 17       | 1.99937 | -9.76624   |  | 350 (v), 440 (v), 895 (v), 907 (v) |
| 91. CR ( 1) C 19       | 1.99937 | -9.76959   |  | 900 (v), 410 (v), 380 (v), 381 (v) |
| 99. CR ( 1) O 44       | 1.99979 | -18.58421  |  | 213 (v), 912 (v)                   |
| 103. CR ( 1) O 48      | 1.99980 | -18.58778  |  | 303 (v), 913 (v)                   |
| 104. CR ( 1) N 49      | 1.99947 | -13.88722  |  | 913 (r), 258 (v), 260 (v), 185 (v) |
|                        |         |            |  | 183 (v)                            |
| 106. CR ( 1) Ru 51     | 2.00000 | -826.14408 |  | 789 (g), 785 (g), 780 (g), 776 (g) |
| 107. CR ( 2) Ru 51     | 2.00000 | -113.66637 |  | 916 (v), 911 (v), 788 (g)          |
|                        |         |            |  | 789 (g), 785 (g), 780 (g), 916 (v) |
| 108. CR ( 3) Ru 51     | 1.99999 | -21.94861  |  | 911 (v), 776 (g), 788 (g), 900 (v) |
|                        |         |            |  | 748 (g), 757 (g), 767 (g), 777 (g) |
|                        |         |            |  | 902 (g), 750 (g), 890 (r), 762 (g) |
|                        |         |            |  | 892 (r), 759 (g), 755 (g), 897 (v) |
|                        |         |            |  | 764 (g), 763 (g), 770 (g), 848 (r) |
|                        |         |            |  | 847 (r), 846 (r), 853 (r), 882 (r) |
|                        |         |            |  | 640 (r), 805 (r)                   |
| 109. CR ( 4) Ru 51     | 1.98720 | -4.60970   |  | 916 (v), 911 (v), 900 (v), 303 (v) |
|                        |         |            |  | 213 (v), 902 (g), 789 (g), 890 (r) |
|                        |         |            |  | 892 (r), 785 (g), 780 (g), 776 (g) |
|                        |         |            |  | 897 (v), 748 (g), 757 (g), 767 (g) |
|                        |         |            |  | 777 (g), 762 (g), 750 (g), 759 (g) |
|                        |         |            |  | 755 (g), 763 (g), 764 (g), 788 (g) |
|                        |         |            |  | 760 (g), 770 (g), 318 (v), 752 (g) |
|                        |         |            |  | 915 (v), 309 (v), 772 (g), 848 (r) |
|                        |         |            |  | 846 (r), 847 (r), 805 (r), 640 (r) |
|                        |         |            |  | 882 (r), 853 (r), 638 (r), 926 (r) |
|                        |         |            |  | 570 (r), 661 (r)                   |
| 110. CR ( 5) Ru 51     | 2.00000 | -91.91771  |  |                                    |
| 111. CR ( 6) Ru 51     | 2.00000 | -28.68760  |  |                                    |
| 112. CR ( 7) Ru 51     | 1.99366 | -1.84234   |  | 913 (g), 902 (g), 916 (v), 900 (v) |
|                        |         |            |  | 890 (r)                            |
| 113. CR ( 8) Ru 51     | 2.00000 | -91.91809  |  |                                    |
| 114. CR ( 9) Ru 51     | 2.00000 | -28.68812  |  |                                    |
| 115. CR (10) Ru 51     | 1.99491 | -1.84645   |  | 912 (g), 902 (g), 913 (g), 915 (v) |
|                        |         |            |  | 911 (v), 909 (v), 934 (r)          |
| 116. CR (11) Ru 51     | 2.00000 | -91.91778  |  |                                    |
| 117. CR (12) Ru 51     | 2.00000 | -28.68776  |  |                                    |
| 118. CR (13) Ru 51     | 1.99208 | -1.84416   |  | 912 (g), 913 (g), 911 (v), 902 (g) |
|                        |         |            |  | 916 (v), 914 (v)                   |
| 119. CR (14) Ru 51     | 2.00000 | -10.09618  |  |                                    |
| 120. CR (15) Ru 51     | 2.00000 | -10.09583  |  |                                    |
| 121. CR (16) Ru 51     | 2.00000 | -10.09692  |  |                                    |
| 122. CR (17) Ru 51     | 2.00000 | -10.09520  |  |                                    |
| 123. CR (18) Ru 51     | 2.00000 | -10.09482  |  |                                    |
| 148. LP ( 1) O 44      | 1.97801 | -0.68602   |  | 213 (v), 805 (r), 912 (v), 215 (v) |
|                        |         |            |  | 220 (v), 219 (v), 847 (r), 848 (r) |
|                        |         |            |  | 640 (r), 846 (r)                   |
| 154. LP ( 1) O 48      | 1.97768 | -0.68008   |  | 303 (v), 913 (v), 310 (v), 805 (r) |
|                        |         |            |  | 796 (r), 848 (r), 846 (r), 847 (r) |
| 155. LP ( 1) N 49      | 1.65970 | -0.37281   |  | 913 (r), 876 (v), 887 (v), 796 (r) |
|                        |         |            |  | 891 (v), 183 (v), 258 (v), 894 (v) |
|                        |         |            |  | 900 (r), 757 (r), 902 (r), 748 (r) |
|                        |         |            |  | 767 (r), 755 (r), 260 (v), 911 (r) |
|                        |         |            |  | 776 (r), 750 (r), 764 (r), 780 (r) |
|                        |         |            |  | 185 (v), 777 (r), 910 (r), 762 (r) |
|                        |         |            |  | 785 (r), 305 (r), 797 (r), 895 (r) |
|                        |         |            |  | 825 (r), 848 (r), 847 (r), 846 (r) |
|                        |         |            |  | 570 (r), 640 (r), 638 (r), 853 (r) |
|                        |         |            |  | 824 (r), 805 (r), 851 (r), 338 (r) |
|                        |         |            |  | 662 (r), 882 (r), 798 (r), 845 (r) |
|                        |         |            |  | 803 (r), 815 (r)                   |
| 157. LP ( 1) Ru 51     | 1.76340 | -0.20477   |  | 796 (r), 915 (v), 914 (v), 909 (v) |
|                        |         |            |  | 805 (r), 825 (r), 797 (r), 901 (v) |
|                        |         |            |  | 720 (r), 815 (r), 659 (r), 306 (v) |
|                        |         |            |  | 216 (v), 824 (r), 801 (r), 320 (v) |
|                        |         |            |  | 835 (v), 820 (r), 900 (v), 319 (v) |
|                        |         |            |  | 823 (r), 836 (r), 814 (v), 810 (r) |
|                        |         |            |  | 798 (r), 819 (r), 818 (r), 847 (r) |
|                        |         |            |  | 926 (r), 837 (r), 799 (r), 811 (r) |
|                        |         |            |  | 804 (r), 668 (r), 840 (r), 733 (r) |
|                        |         |            |  | 812 (r), 800 (r), 845 (r), 273 (r) |
|                        |         |            |  | 841 (r), 676 (r), 570 (r), 813 (r) |
|                        |         |            |  | 691 (r), 817 (r), 638 (r), 852 (r) |
|                        |         |            |  | 428 (r), 807 (r)                   |
| 158. LP ( 2) Ru 51     | 1.71227 | -0.20911   |  | 909 (v), 796 (r), 915 (v), 901 (v) |
|                        |         |            |  | 914 (v), 797 (r), 216 (v), 319 (v) |
|                        |         |            |  | 825 (r), 902 (g), 306 (v), 720 (r) |
|                        |         |            |  | 815 (r), 658 (r), 845 (r), 320 (v) |
|                        |         |            |  | 804 (r), 840 (r), 659 (r), 799 (r) |
|                        |         |            |  | 833 (r), 934 (r), 817 (r), 820 (r) |

|      |              |         |          |                                    |
|------|--------------|---------|----------|------------------------------------|
|      |              |         |          | 798 (r), 841 (r), 821 (r), 801 (r) |
|      |              |         |          | 882 (r), 805 (r), 848 (r), 814 (r) |
|      |              |         |          | 800 (r), 846 (r), 836 (r), 824 (r) |
|      |              |         |          | 852 (r), 819 (r), 810 (r), 802 (r) |
|      |              |         |          | 860 (r), 273 (r), 837 (r), 811 (r) |
|      |              |         |          | 393 (r), 858 (r), 861 (r), 733 (r) |
|      |              |         |          | 668 (r), 803 (r), 850 (r), 806 (r) |
|      |              |         |          | 926 (r), 816 (r), 243 (r), 676 (r) |
| 159. | LP ( 3)Ru 51 | 1.66503 | -0.22008 | 910 (v), 914 (v), 915 (v), 893 (r) |
|      |              |         |          | 304 (v), 719 (r), 214 (v), 796 (r) |
|      |              |         |          | 909 (v), 844 (r), 803 (r), 934 (r) |
|      |              |         |          | 802 (r)                            |
| 168. | RY* ( 1) C 1 | 0.00291 |          | 1.65991                            |
| 169. | RY* ( 2) C 1 | 0.00212 |          | 0.54161                            |
| 170. | RY* ( 3) C 1 | 0.00109 |          | 1.84990                            |
| 171. | RY* ( 4) C 1 | 0.00059 |          | 1.23904                            |
| 172. | RY* ( 5) C 1 | 0.00034 |          | 1.81619                            |
| 173. | RY* ( 6) C 1 | 0.00012 |          | 7.80076                            |
| 174. | RY* ( 7) C 1 | 0.00010 |          | 3.73384                            |
| 175. | RY* ( 8) C 1 | 0.00006 |          | 2.37374                            |
| 176. | RY* ( 9) C 1 | 0.00004 |          | 3.19237                            |
| 177. | RY* (10) C 1 | 0.00001 |          | 4.52707                            |
| 178. | RY* (11) C 1 | 0.00002 |          | 2.57955                            |
| 179. | RY* (12) C 1 | 0.00001 |          | 8.41022                            |
| 180. | RY* (13) C 1 | 0.00001 |          | 2.13361                            |
| 181. | RY* (14) C 1 | 0.00000 |          | 24.78095                           |
| 182. | RY* (15) C 1 | 0.00000 |          | 39.42229                           |
| 183. | RY* ( 1) C 2 | 0.00601 |          | 1.49816                            |
| 184. | RY* ( 2) C 2 | 0.00498 |          | 0.63948                            |
| 185. | RY* ( 3) C 2 | 0.00230 |          | 1.78834                            |
| 186. | RY* ( 4) C 2 | 0.00127 |          | 1.42942                            |
| 187. | RY* ( 5) C 2 | 0.00058 |          | 1.92744                            |
| 188. | RY* ( 6) C 2 | 0.00036 |          | 3.65314                            |
| 189. | RY* ( 7) C 2 | 0.00015 |          | 4.84951                            |
| 190. | RY* ( 8) C 2 | 0.00012 |          | 8.77224                            |
| 191. | RY* ( 9) C 2 | 0.00009 |          | 3.62780                            |
| 192. | RY* (10) C 2 | 0.00009 |          | 3.27897                            |
| 193. | RY* (11) C 2 | 0.00005 |          | 4.33120                            |
| 194. | RY* (12) C 2 | 0.00002 |          | 2.67539                            |
| 195. | RY* (13) C 2 | 0.00002 |          | 3.20310                            |
| 196. | RY* (14) C 2 | 0.00000 |          | 39.99577                           |
| 197. | RY* (15) C 2 | 0.00000 |          | 26.15495                           |
| 198. | RY* ( 1) C 3 | 0.00252 |          | 1.73202                            |
| 199. | RY* ( 2) C 3 | 0.00153 |          | 1.71042                            |
| 200. | RY* ( 3) C 3 | 0.00098 |          | 0.52425                            |
| 201. | RY* ( 4) C 3 | 0.00079 |          | 1.17762                            |
| 202. | RY* ( 5) C 3 | 0.00052 |          | 1.82087                            |
| 203. | RY* ( 6) C 3 | 0.00010 |          | 3.11635                            |
| 204. | RY* ( 7) C 3 | 0.00005 |          | 6.86842                            |
| 205. | RY* ( 8) C 3 | 0.00003 |          | 3.78718                            |
| 206. | RY* ( 9) C 3 | 0.00002 |          | 2.00420                            |
| 207. | RY* (10) C 3 | 0.00001 |          | 8.61734                            |
| 208. | RY* (11) C 3 | 0.00001 |          | 2.94857                            |
| 209. | RY* (12) C 3 | 0.00002 |          | 4.96196                            |
| 210. | RY* (13) C 3 | 0.00000 |          | 2.33290                            |
| 211. | RY* (14) C 3 | 0.00000 |          | 29.13652                           |
| 212. | RY* (15) C 3 | 0.00000 |          | 36.18911                           |
| 213. | RY* ( 1) C 4 | 0.01427 |          | 2.25688                            |
| 214. | RY* ( 2) C 4 | 0.00422 |          | 1.47512                            |
| 215. | RY* ( 3) C 4 | 0.00410 |          | 1.59405                            |
| 216. | RY* ( 4) C 4 | 0.00317 |          | 1.78830                            |
| 217. | RY* ( 5) C 4 | 0.00198 |          | 1.97148                            |
| 218. | RY* ( 6) C 4 | 0.00160 |          | 1.97943                            |
| 219. | RY* ( 7) C 4 | 0.00022 |          | 6.62171                            |
| 220. | RY* ( 8) C 4 | 0.00013 |          | 4.07361                            |
| 221. | RY* ( 9) C 4 | 0.00010 |          | 2.93740                            |
| 222. | RY* (10) C 4 | 0.00008 |          | 1.67778                            |
| 223. | RY* (11) C 4 | 0.00005 |          | 3.07996                            |
| 224. | RY* (12) C 4 | 0.00003 |          | 3.36217                            |
| 225. | RY* (13) C 4 | 0.00002 |          | 2.55104                            |
| 226. | RY* (14) C 4 | 0.00000 |          | 45.60743                           |
| 227. | RY* (15) C 4 | 0.00000 |          | 26.60998                           |
| 228. | RY* ( 1) C 5 | 0.00308 |          | 1.52671                            |
| 229. | RY* ( 2) C 5 | 0.00178 |          | 0.46640                            |
| 230. | RY* ( 3) C 5 | 0.00090 |          | 1.64969                            |
| 231. | RY* ( 4) C 5 | 0.00052 |          | 1.60067                            |
| 232. | RY* ( 5) C 5 | 0.00037 |          | 1.81186                            |
| 233. | RY* ( 6) C 5 | 0.00015 |          | 6.27186                            |
| 234. | RY* ( 7) C 5 | 0.00011 |          | 4.60520                            |
| 235. | RY* ( 8) C 5 | 0.00008 |          | 3.17626                            |
| 236. | RY* ( 9) C 5 | 0.00006 |          | 1.74545                            |
| 237. | RY* (10) C 5 | 0.00002 |          | 3.18140                            |
| 238. | RY* (11) C 5 | 0.00002 |          | 4.74429                            |
| 239. | RY* (12) C 5 | 0.00002 |          | 6.56242                            |
| 240. | RY* (13) C 5 | 0.00000 |          | 2.31304                            |
| 241. | RY* (14) C 5 | 0.00000 |          | 30.21627                           |
| 242. | RY* (15) C 5 | 0.00000 |          | 36.68473                           |
| 258. | RY* ( 1) C 7 | 0.00833 |          | 1.55010                            |
| 259. | RY* ( 2) C 7 | 0.00512 |          | 0.60429                            |
| 260. | RY* ( 3) C 7 | 0.00343 |          | 1.96976                            |
| 261. | RY* ( 4) C 7 | 0.00110 |          | 1.48678                            |
| 262. | RY* ( 5) C 7 | 0.00101 |          | 1.77824                            |
| 263. | RY* ( 6) C 7 | 0.00055 |          | 1.81766                            |
| 264. | RY* ( 7) C 7 | 0.00053 |          | 4.03623                            |
| 265. | RY* ( 8) C 7 | 0.00019 |          | 11.60429                           |
| 266. | RY* ( 9) C 7 | 0.00019 |          | 3.83340                            |
| 267. | RY* (10) C 7 | 0.00012 |          | 3.60615                            |
| 268. | RY* (11) C 7 | 0.00010 |          | 5.51055                            |
| 269. | RY* (12) C 7 | 0.00003 |          | 3.00913                            |
| 270. | RY* (13) C 7 | 0.00002 |          | 3.53409                            |
| 271. | RY* (14) C 7 | 0.00000 |          | 41.95976                           |
| 271. | RY* (15) C 7 | 0.00000 |          | 23.88850                           |
| 288. | RY* ( 1) C 9 | 0.00790 |          | 1.43894                            |
| 289. | RY* ( 2) C 9 | 0.00432 |          | 0.54768                            |
| 290. | RY* ( 3) C 9 | 0.00276 |          | 1.80836                            |
| 291. | RY* ( 4) C 9 | 0.00105 |          | 1.16655                            |
| 292. | RY* ( 5) C 9 | 0.00052 |          | 1.95867                            |
| 293. | RY* ( 6) C 9 | 0.00050 |          | 3.88835                            |
| 294. | RY* ( 7) C 9 | 0.00043 |          | 1.82907                            |
| 295. | RY* ( 8) C 9 | 0.00021 |          | 4.22880                            |
| 296. | RY* ( 9) C 9 | 0.00014 |          | 13.72900                           |
| 297. | RY* (10) C 9 | 0.00012 |          | 4.03184                            |
| 298. | RY* (11) C 9 | 0.00008 |          | 3.81585                            |
| 299. | RY* (12) C 9 | 0.00004 |          | 2.80766                            |
| 300. | RY* (13) C 9 | 0.00002 |          | 2.97936                            |
| 301. | RY* (14) C 9 | 0.00000 |          | 41.62670                           |

|      |     |      |   |    |         |          |
|------|-----|------|---|----|---------|----------|
| 302. | RY* | (15) | C | 9  | 0.00000 | 25.75011 |
| 303. | RY* | (1)  | C | 10 | 0.01427 | 2.07618  |
| 304. | RY* | (2)  | C | 10 | 0.00540 | 0.90908  |
| 305. | RY* | (3)  | C | 10 | 0.00407 | 2.61220  |
| 306. | RY* | (4)  | C | 10 | 0.00283 | 1.77949  |
| 307. | RY* | (5)  | C | 10 | 0.00203 | 1.68199  |
| 308. | RY* | (6)  | C | 10 | 0.00151 | 2.30908  |
| 309. | RY* | (7)  | C | 10 | 0.00026 | 6.67801  |
| 310. | RY* | (8)  | C | 10 | 0.00011 | 3.98263  |
| 311. | RY* | (9)  | C | 10 | 0.00009 | 3.90191  |
| 312. | RY* | (10) | C | 10 | 0.00009 | 2.06995  |
| 313. | RY* | (11) | C | 10 | 0.00007 | 1.78658  |
| 314. | RY* | (12) | C | 10 | 0.00004 | 2.74645  |
| 315. | RY* | (13) | C | 10 | 0.00003 | 2.79435  |
| 316. | RY* | (14) | C | 10 | 0.00000 | 45.55271 |
| 317. | RY* | (15) | C | 10 | 0.00000 | 25.41748 |
| 318. | RY* | (1)  | C | 11 | 0.00834 | 1.23876  |
| 319. | RY* | (2)  | C | 11 | 0.00744 | 0.74680  |
| 320. | RY* | (3)  | C | 11 | 0.00588 | 1.01445  |
| 321. | RY* | (4)  | C | 11 | 0.00249 | 2.26017  |
| 322. | RY* | (5)  | C | 11 | 0.00050 | 1.98037  |
| 323. | RY* | (6)  | C | 11 | 0.00044 | 2.41428  |
| 324. | RY* | (7)  | C | 11 | 0.00037 | 2.85968  |
| 325. | RY* | (8)  | C | 11 | 0.00030 | 4.63621  |
| 326. | RY* | (9)  | C | 11 | 0.00024 | 13.98357 |
| 327. | RY* | (10) | C | 11 | 0.00013 | 4.12641  |
| 328. | RY* | (11) | C | 11 | 0.00013 | 3.35717  |
| 329. | RY* | (12) | C | 11 | 0.00007 | 3.14662  |
| 330. | RY* | (13) | C | 11 | 0.00002 | 3.48581  |
| 331. | RY* | (14) | C | 11 | 0.00000 | 39.85164 |
| 332. | RY* | (15) | C | 11 | 0.00000 | 26.53757 |
| 348. | RY* | (1)  | C | 13 | 0.00322 | 1.53942  |
| 349. | RY* | (2)  | C | 13 | 0.00237 | 0.53113  |
| 350. | RY* | (3)  | C | 13 | 0.00100 | 1.73248  |
| 351. | RY* | (4)  | C | 13 | 0.00069 | 1.53820  |
| 352. | RY* | (5)  | C | 13 | 0.00049 | 1.78780  |
| 353. | RY* | (6)  | C | 13 | 0.00012 | 3.68252  |
| 354. | RY* | (7)  | C | 13 | 0.00012 | 7.24406  |
| 355. | RY* | (8)  | C | 13 | 0.00007 | 2.80206  |
| 356. | RY* | (9)  | C | 13 | 0.00003 | 2.88043  |
| 357. | RY* | (10) | C | 13 | 0.00002 | 3.44014  |
| 358. | RY* | (11) | C | 13 | 0.00002 | 6.04004  |
| 359. | RY* | (12) | C | 13 | 0.00003 | 2.59930  |
| 360. | RY* | (13) | C | 13 | 0.00000 | 37.01188 |
| 361. | RY* | (14) | C | 13 | 0.00000 | 2.07021  |
| 362. | RY* | (15) | C | 13 | 0.00000 | 31.76723 |
| 378. | RY* | (1)  | C | 15 | 0.00502 | 1.65279  |
| 379. | RY* | (2)  | C | 15 | 0.00310 | 0.50163  |
| 380. | RY* | (3)  | C | 15 | 0.00160 | 1.75490  |
| 381. | RY* | (4)  | C | 15 | 0.00094 | 1.02411  |
| 382. | RY* | (5)  | C | 15 | 0.00030 | 1.80435  |
| 383. | RY* | (6)  | C | 15 | 0.00022 | 3.46828  |
| 384. | RY* | (7)  | C | 15 | 0.00013 | 8.18227  |
| 385. | RY* | (8)  | C | 15 | 0.00007 | 2.69610  |
| 386. | RY* | (9)  | C | 15 | 0.00007 | 4.72076  |
| 387. | RY* | (10) | C | 15 | 0.00005 | 4.27254  |
| 388. | RY* | (11) | C | 15 | 0.00003 | 5.36334  |
| 389. | RY* | (12) | C | 15 | 0.00001 | 2.48520  |
| 390. | RY* | (13) | C | 15 | 0.00002 | 3.31431  |
| 391. | RY* | (14) | C | 15 | 0.00000 | 26.86682 |
| 392. | RY* | (15) | C | 15 | 0.00000 | 40.20264 |
| 408. | RY* | (1)  | C | 17 | 0.00258 | 1.70594  |
| 409. | RY* | (2)  | C | 17 | 0.00225 | 0.49150  |
| 410. | RY* | (3)  | C | 17 | 0.00138 | 1.90889  |
| 411. | RY* | (4)  | C | 17 | 0.00093 | 1.17447  |
| 412. | RY* | (5)  | C | 17 | 0.00043 | 1.83487  |
| 413. | RY* | (6)  | C | 17 | 0.00010 | 3.50431  |
| 414. | RY* | (7)  | C | 17 | 0.00006 | 6.02774  |
| 415. | RY* | (8)  | C | 17 | 0.00001 | 3.47642  |
| 416. | RY* | (9)  | C | 17 | 0.00001 | 3.14384  |
| 417. | RY* | (10) | C | 17 | 0.00001 | 3.38787  |
| 418. | RY* | (11) | C | 17 | 0.00001 | 3.28343  |
| 419. | RY* | (12) | C | 17 | 0.00001 | 5.45121  |
| 420. | RY* | (13) | C | 17 | 0.00000 | 31.31780 |
| 421. | RY* | (14) | C | 17 | 0.00000 | 37.22835 |
| 422. | RY* | (15) | C | 17 | 0.00001 | 1.93082  |
| 438. | RY* | (1)  | C | 19 | 0.00314 | 1.58434  |
| 439. | RY* | (2)  | C | 19 | 0.00182 | 0.51959  |
| 440. | RY* | (3)  | C | 19 | 0.00121 | 1.87747  |
| 441. | RY* | (4)  | C | 19 | 0.00062 | 1.38023  |
| 442. | RY* | (5)  | C | 19 | 0.00053 | 1.85237  |
| 443. | RY* | (6)  | C | 19 | 0.00011 | 3.86854  |
| 444. | RY* | (7)  | C | 19 | 0.00009 | 6.25760  |
| 445. | RY* | (8)  | C | 19 | 0.00004 | 2.41814  |
| 446. | RY* | (9)  | C | 19 | 0.00001 | 7.57950  |
| 447. | RY* | (10) | C | 19 | 0.00001 | 3.36332  |
| 448. | RY* | (11) | C | 19 | 0.00000 | 36.48825 |
| 449. | RY* | (12) | C | 19 | 0.00000 | 3.28250  |
| 450. | RY* | (13) | C | 19 | 0.00001 | 2.64648  |
| 451. | RY* | (14) | C | 19 | 0.00000 | 31.07028 |
| 452. | RY* | (15) | C | 19 | 0.00001 | 2.00781  |
| 558. | RY* | (1)  | H | 27 | 0.00138 | 1.36728  |
| 559. | RY* | (2)  | H | 27 | 0.00056 | 1.98015  |
| 560. | RY* | (3)  | H | 27 | 0.00021 | 0.95889  |
| 561. | RY* | (4)  | H | 27 | 0.00007 | 1.79020  |
| 562. | RY* | (5)  | H | 27 | 0.00005 | 3.42944  |
| 563. | RY* | (1)  | H | 28 | 0.00043 | 1.70360  |
| 564. | RY* | (2)  | H | 28 | 0.00038 | 0.91762  |
| 565. | RY* | (3)  | H | 28 | 0.00033 | 1.66620  |
| 566. | RY* | (4)  | H | 28 | 0.00009 | 1.43103  |
| 567. | RY* | (5)  | H | 28 | 0.00002 | 4.37429  |
| 573. | RY* | (1)  | H | 30 | 0.00055 | 1.00443  |
| 574. | RY* | (2)  | H | 30 | 0.00051 | 1.40051  |
| 575. | RY* | (3)  | H | 30 | 0.00033 | 1.82239  |
| 576. | RY* | (4)  | H | 30 | 0.00011 | 1.57189  |
| 577. | RY* | (5)  | H | 30 | 0.00002 | 4.31092  |
| 588. | RY* | (1)  | H | 33 | 0.00117 | 1.37625  |
| 589. | RY* | (2)  | H | 33 | 0.00053 | 1.91953  |
| 590. | RY* | (3)  | H | 33 | 0.00034 | 0.94984  |
| 591. | RY* | (4)  | H | 33 | 0.00011 | 1.46391  |
| 592. | RY* | (5)  | H | 33 | 0.00003 | 4.12028  |
| 593. | RY* | (1)  | H | 34 | 0.00062 | 0.88562  |
| 594. | RY* | (2)  | H | 34 | 0.00046 | 1.47368  |
| 595. | RY* | (3)  | H | 34 | 0.00033 | 1.42971  |
| 596. | RY* | (4)  | H | 34 | 0.00005 | 1.44248  |
| 597. | RY* | (5)  | H | 34 | 0.00001 | 4.65246  |

|      |     |      |    |         |         |             |                                       |
|------|-----|------|----|---------|---------|-------------|---------------------------------------|
| 598. | RY* | ( 1) | H  | 35      | 0.00051 | 0.88969     |                                       |
| 599. | RY* | ( 2) | H  | 35      | 0.00037 | 1.83859     |                                       |
| 600. | RY* | ( 3) | H  | 35      | 0.00028 | 0.99311     |                                       |
| 601. | RY* | ( 4) | H  | 35      | 0.00005 | 1.50527     |                                       |
| 602. | RY* | ( 5) | H  | 35      | 0.00001 | 4.81933     |                                       |
| 628. | RY* | ( 1) | H  | 41      | 0.00041 | 1.61036     |                                       |
| 629. | RY* | ( 2) | H  | 41      | 0.00035 | 0.86123     |                                       |
| 630. | RY* | ( 3) | H  | 41      | 0.00031 | 1.22798     |                                       |
| 631. | RY* | ( 4) | H  | 41      | 0.00005 | 1.40238     |                                       |
| 632. | RY* | ( 5) | H  | 41      | 0.00001 | 4.84313     |                                       |
| 633. | RY* | ( 1) | H  | 42      | 0.00048 | 0.91033     |                                       |
| 634. | RY* | ( 2) | H  | 42      | 0.00036 | 1.60265     |                                       |
| 635. | RY* | ( 3) | H  | 42      | 0.00024 | 1.07316     |                                       |
| 636. | RY* | ( 4) | H  | 42      | 0.00004 | 1.57287     |                                       |
| 637. | RY* | ( 5) | H  | 42      | 0.00002 | 4.47891     |                                       |
| 643. | RY* | ( 1) | O  | 44      | 0.00268 | 0.68966     |                                       |
| 644. | RY* | ( 2) | O  | 44      | 0.00195 | 0.70477     |                                       |
| 645. | RY* | ( 3) | O  | 44      | 0.00097 | 1.76239     |                                       |
| 646. | RY* | ( 4) | O  | 44      | 0.00020 | 0.71922     |                                       |
| 647. | RY* | ( 5) | O  | 44      | 0.00005 | 2.40125     |                                       |
| 648. | RY* | ( 6) | O  | 44      | 0.00002 | 2.86244     |                                       |
| 649. | RY* | ( 7) | O  | 44      | 0.00002 | 4.05375     |                                       |
| 650. | RY* | ( 8) | O  | 44      | 0.00002 | 3.63166     |                                       |
| 651. | RY* | ( 9) | O  | 44      | 0.00000 | 100.20330   |                                       |
| 652. | RY* | (10) | O  | 44      | 0.00000 | 3.26874     |                                       |
| 653. | RY* | (11) | O  | 44      | 0.00000 | 10.09673    |                                       |
| 654. | RY* | (12) | O  | 44      | 0.00001 | 1.24746     |                                       |
| 655. | RY* | (13) | O  | 44      | 0.00000 | 4.51001     |                                       |
| 656. | RY* | (14) | O  | 44      | 0.00000 | 64.38029    |                                       |
| 657. | RY* | (15) | O  | 44      | 0.00000 | 2.98603     |                                       |
| 703. | RY* | ( 1) | O  | 48      | 0.00289 | 0.72577     |                                       |
| 704. | RY* | ( 2) | O  | 48      | 0.00205 | 0.76649     |                                       |
| 705. | RY* | ( 3) | O  | 48      | 0.00134 | 1.98973     |                                       |
| 706. | RY* | ( 4) | O  | 48      | 0.00022 | 0.71722     |                                       |
| 707. | RY* | ( 5) | O  | 48      | 0.00006 | 2.09505     |                                       |
| 708. | RY* | ( 6) | O  | 48      | 0.00003 | 1.89145     |                                       |
| 709. | RY* | ( 7) | O  | 48      | 0.00004 | 1.51051     |                                       |
| 710. | RY* | ( 8) | O  | 48      | 0.00002 | 1.59029     |                                       |
| 711. | RY* | ( 9) | O  | 48      | 0.00001 | 1.39242     |                                       |
| 712. | RY* | (10) | O  | 48      | 0.00000 | 4.89454     |                                       |
| 713. | RY* | (11) | O  | 48      | 0.00000 | 9.41259     |                                       |
| 714. | RY* | (12) | O  | 48      | 0.00001 | 5.21945     |                                       |
| 715. | RY* | (13) | O  | 48      | 0.00000 | 69.88343    |                                       |
| 716. | RY* | (14) | O  | 48      | 0.00000 | 4.88563     |                                       |
| 717. | RY* | (15) | O  | 48      | 0.00000 | 96.89437    |                                       |
| 718. | RY* | ( 1) | N  | 49      | 0.01012 | 1.91451     |                                       |
| 719. | RY* | ( 2) | N  | 49      | 0.00673 | 0.84609     |                                       |
| 720. | RY* | ( 3) | N  | 49      | 0.00501 | 2.11671     |                                       |
| 721. | RY* | ( 4) | N  | 49      | 0.00202 | 4.55053     |                                       |
| 722. | RY* | ( 5) | N  | 49      | 0.00049 | 1.80225     |                                       |
| 723. | RY* | ( 6) | N  | 49      | 0.00031 | 1.78041     |                                       |
| 724. | RY* | ( 7) | N  | 49      | 0.00032 | 3.08037     |                                       |
| 725. | RY* | ( 8) | N  | 49      | 0.00014 | 13.98916    |                                       |
| 726. | RY* | ( 9) | N  | 49      | 0.00012 | 4.50809     |                                       |
| 727. | RY* | (10) | N  | 49      | 0.00008 | 3.30465     |                                       |
| 728. | RY* | (11) | N  | 49      | 0.00004 | 4.75358     |                                       |
| 729. | RY* | (12) | N  | 49      | 0.00005 | 4.49848     |                                       |
| 730. | RY* | (13) | N  | 49      | 0.00002 | 5.14107     |                                       |
| 731. | RY* | (14) | N  | 49      | 0.00000 | 48.25327    |                                       |
| 732. | RY* | (15) | N  | 49      | 0.00000 | 27.23159    |                                       |
| 748. | RY* | ( 1) | Ru | 51      | 0.00794 | 18.05599    |                                       |
| 749. | RY* | ( 2) | Ru | 51      | 0.00722 | 0.89188     |                                       |
| 750. | RY* | ( 3) | Ru | 51      | 0.00563 | 8.25581     |                                       |
| 751. | RY* | ( 4) | Ru | 51      | 0.00456 | 1.25173     |                                       |
| 752. | RY* | ( 5) | Ru | 51      | 0.00420 | 4.15971     |                                       |
| 753. | RY* | ( 6) | Ru | 51      | 0.00393 | 3.10814     |                                       |
| 754. | RY* | ( 7) | Ru | 51      | 0.00310 | 4.19837     |                                       |
| 755. | RY* | ( 8) | Ru | 51      | 0.00270 | 6.13832     |                                       |
| 756. | RY* | ( 9) | Ru | 51      | 0.00220 | 2.60828     |                                       |
| 757. | RY* | (10) | Ru | 51      | 0.00126 | 21.24419    |                                       |
| 758. | RY* | (11) | Ru | 51      | 0.00077 | 6.83220     |                                       |
| 759. | RY* | (12) | Ru | 51      | 0.00053 | 14.73701    |                                       |
| 760. | RY* | (13) | Ru | 51      | 0.00036 | 4.77796     |                                       |
| 761. | RY* | (14) | Ru | 51      | 0.00029 | 7.53022     |                                       |
| 762. | RY* | (15) | Ru | 51      | 0.00022 | 14.21945    |                                       |
| 763. | RY* | (16) | Ru | 51      | 0.00018 | 12.79787    |                                       |
| 764. | RY* | (17) | Ru | 51      | 0.00016 | 10.53205    |                                       |
| 765. | RY* | (18) | Ru | 51      | 0.00011 | 6.69917     |                                       |
| 766. | RY* | (19) | Ru | 51      | 0.00007 | 6.84368     |                                       |
| 767. | RY* | (20) | Ru | 51      | 0.00003 | 17.20237    |                                       |
| 768. | RY* | (21) | Ru | 51      | 0.00001 | 16.85227    |                                       |
| 769. | RY* | (22) | Ru | 51      | 0.00002 | 8.91019     |                                       |
| 770. | RY* | (23) | Ru | 51      | 0.00001 | 16.15258    |                                       |
| 771. | RY* | (24) | Ru | 51      | 0.00000 | 2234.43985  |                                       |
| 772. | RY* | (25) | Ru | 51      | 0.00000 | 9406.04790  |                                       |
| 773. | RY* | (26) | Ru | 51      | 0.00000 | 37513.60496 |                                       |
| 774. | RY* | (27) | Ru | 51      | 0.00000 | 49.21263    |                                       |
| 775. | RY* | (28) | Ru | 51      | 0.00000 | 186.07030   |                                       |
| 776. | RY* | (29) | Ru | 51      | 0.00001 | 77.42677    |                                       |
| 777. | RY* | (30) | Ru | 51      | 0.00000 | 25.71184    |                                       |
| 778. | RY* | (31) | Ru | 51      | 0.00000 | 18.63520    |                                       |
| 779. | RY* | (32) | Ru | 51      | 0.00000 | 53.83398    |                                       |
| 780. | RY* | (33) | Ru | 51      | 0.00000 | 324.32589   |                                       |
| 781. | RY* | (34) | Ru | 51      | 0.00000 | 50.18125    |                                       |
| 782. | RY* | (35) | Ru | 51      | 0.00000 | 18.44450    |                                       |
| 783. | RY* | (36) | Ru | 51      | 0.00000 | 53.88333    |                                       |
| 784. | RY* | (37) | Ru | 51      | 0.00000 | 186.18134   |                                       |
| 785. | RY* | (38) | Ru | 51      | 0.00000 | 596.16282   |                                       |
| 786. | RY* | (39) | Ru | 51      | 0.00000 | 17.87961    |                                       |
| 787. | RY* | (40) | Ru | 51      | 0.00000 | 53.88814    |                                       |
| 788. | RY* | (41) | Ru | 51      | 0.00000 | 88.93320    |                                       |
| 789. | RY* | (42) | Ru | 51      | 0.00000 | 532.76526   |                                       |
| 790. | RY* | (43) | Ru | 51      | 0.00000 | 18.22289    |                                       |
| 791. | RY* | (44) | Ru | 51      | 0.00000 | 54.01708    |                                       |
| 792. | RY* | (45) | Ru | 51      | 0.00000 | 50.95141    |                                       |
| 793. | RY* | (46) | Ru | 51      | 0.00000 | 186.02991   |                                       |
| 794. | RY* | (47) | Ru | 51      | 0.00000 | 19.42641    |                                       |
| 795. | RY* | (48) | Ru | 51      | 0.00000 | 53.87513    |                                       |
| 873. | BD* | ( 1) | C  | 3- C 5  | 0.01279 | 0.46023     |                                       |
| 874. | BD* | ( 2) | C  | 3- C 5  | 0.28773 | -0.02354    | 888 (v) , 893 (v) , 229 (g) , 200 (g) |
| 875. | BD* | ( 1) | C  | 3- H 41 | 0.01463 | 0.36995     |                                       |
| 876. | BD* | ( 1) | C  | 5- C 7  | 0.03150 | 0.46145     |                                       |
| 877. | BD* | ( 1) | C  | 5- H 28 | 0.01528 | 0.37204     |                                       |
| 886. | BD* | ( 1) | C  | 1- C 3  | 0.01480 | 0.44297     |                                       |
| 887. | BD* | ( 1) | C  | 1- C 2  | 0.02264 | 0.46419     |                                       |
| 888. | BD* | ( 2) | C  | 1- C 2  | 0.28685 | -0.02269    | 874 (v) , 893 (v) , 884 (x) , 169 (g) |

|                               |             |             |                                                                                                                                                                                                                                                                                                                                                                                                                                                                                                                                                                               |
|-------------------------------|-------------|-------------|-------------------------------------------------------------------------------------------------------------------------------------------------------------------------------------------------------------------------------------------------------------------------------------------------------------------------------------------------------------------------------------------------------------------------------------------------------------------------------------------------------------------------------------------------------------------------------|
| 889. BD* ( 1) C 1- H 42       | 0.01334     | 0.37442     | 184 (g), 879 (r)                                                                                                                                                                                                                                                                                                                                                                                                                                                                                                                                                              |
| 890. BD* ( 1) C 2- N 49       | 0.02376     | 0.43498     |                                                                                                                                                                                                                                                                                                                                                                                                                                                                                                                                                                               |
| 891. BD* ( 1) C 2- H 27       | 0.02499     | 0.37370     |                                                                                                                                                                                                                                                                                                                                                                                                                                                                                                                                                                               |
| 892. BD* ( 1) C 7- N 49       | 0.03586     | 0.41587     |                                                                                                                                                                                                                                                                                                                                                                                                                                                                                                                                                                               |
| 893. BD* ( 2) C 7- N 49       | 0.50057     | -0.04382    | 874 (v), 888 (v), 896 (v), 259 (g)<br>719 (g), 229 (v), 805 (r), 184 (v)<br>289 (v), 796 (r), 825 (r), 803 (r)<br>815 (r)                                                                                                                                                                                                                                                                                                                                                                                                                                                     |
| 894. BD* ( 1) C 7- C 9        | 0.03027     | 0.41508     |                                                                                                                                                                                                                                                                                                                                                                                                                                                                                                                                                                               |
| 895. BD* ( 1) C 9- C 13       | 0.02953     | 0.48149     |                                                                                                                                                                                                                                                                                                                                                                                                                                                                                                                                                                               |
| 896. BD* ( 2) C 9- C 13       | 0.41082     | 0.00582     | 904 (v), 901 (v), 893 (v), 349 (g)<br>289 (g)                                                                                                                                                                                                                                                                                                                                                                                                                                                                                                                                 |
| 897. BD* ( 1) C 9- C 11       | 0.03382     | 0.49138     |                                                                                                                                                                                                                                                                                                                                                                                                                                                                                                                                                                               |
| 898. BD* ( 1) C 13- C 17      | 0.01320     | 0.48556     |                                                                                                                                                                                                                                                                                                                                                                                                                                                                                                                                                                               |
| 899. BD* ( 1) C 13- H 30      | 0.01659     | 0.38805     |                                                                                                                                                                                                                                                                                                                                                                                                                                                                                                                                                                               |
| 900. BD* ( 1) C 11- C 15      | 0.02089     | 0.50429     |                                                                                                                                                                                                                                                                                                                                                                                                                                                                                                                                                                               |
| 901. BD* ( 2) C 11- C 15      | 0.30039     | 0.02120     | 896 (v), 904 (v), 379 (g), 912 (v)<br>319 (g), 796 (r), 797 (r), 881 (r)<br>846 (r), 848 (r)                                                                                                                                                                                                                                                                                                                                                                                                                                                                                  |
| 902. BD* ( 1) C 11-Ru 51      | 0.28627     | 0.01989     | 912 (g), 913 (g), 926 (r), 915 (v)<br>909 (v), 796 (r), 718 (r), 305 (v)<br>895 (v), 908 (v), 907 (v), 757 (g)<br>797 (r), 777 (g), 914 (v), 759 (g)<br>661 (r), 672 (r), 658 (r), 825 (r)<br>638 (r), 882 (r), 670 (r), 853 (r)<br>878 (r), 934 (r), 659 (r), 847 (r)<br>849 (r), 570 (r), 798 (r), 640 (r)<br>802 (r), 850 (r), 851 (r), 852 (r)<br>815 (r), 338 (r), 364 (r), 848 (r)<br>833 (r), 820 (r), 883 (r), 821 (r)<br>814 (r), 824 (r)                                                                                                                            |
| 903. BD* ( 1) C 17- C 19      | 0.01534     | 0.46900     |                                                                                                                                                                                                                                                                                                                                                                                                                                                                                                                                                                               |
| 904. BD* ( 2) C 17- C 19      | 0.35553     | 0.00381     | 896 (v), 901 (v), 409 (g), 439 (g)                                                                                                                                                                                                                                                                                                                                                                                                                                                                                                                                            |
| 905. BD* ( 1) C 17- H 34      | 0.01446     | 0.39437     |                                                                                                                                                                                                                                                                                                                                                                                                                                                                                                                                                                               |
| 906. BD* ( 1) C 19- H 35      | 0.01454     | 0.39506     |                                                                                                                                                                                                                                                                                                                                                                                                                                                                                                                                                                               |
| 907. BD* ( 1) C 15- C 19      | 0.02223     | 0.47858     |                                                                                                                                                                                                                                                                                                                                                                                                                                                                                                                                                                               |
| 908. BD* ( 1) C 15- H 33      | 0.01908     | 0.40107     |                                                                                                                                                                                                                                                                                                                                                                                                                                                                                                                                                                               |
| 909. BD* ( 1) C 4- O 44       | 0.24641     | -0.01388    | 914 (r), 915 (r), 902 (v), 643 (g)<br>217 (g), 796 (r), 218 (g), 797 (r)<br>825 (r), 926 (r), 801 (r), 815 (r)<br>914 (r), 644 (g), 915 (r), 218 (g)                                                                                                                                                                                                                                                                                                                                                                                                                          |
| 910. BD* ( 2) C 4- O 44       | 0.18514     | -0.01995    |                                                                                                                                                                                                                                                                                                                                                                                                                                                                                                                                                                               |
| 911. BD* ( 3) C 4- O 44       | 0.01434     | 0.59076     |                                                                                                                                                                                                                                                                                                                                                                                                                                                                                                                                                                               |
| 912. BD* ( 1) C 4-Ru 51       | 0.34326     | 0.07019     | 913 (g), 902 (g), 881 (r), 796 (r)<br>911 (g), 901 (v), 805 (r), 305 (v)<br>915 (v), 797 (r), 914 (v), 849 (r)<br>882 (r), 825 (r), 766 (g), 718 (r)<br>769 (g), 801 (r), 660 (r), 815 (r)<br>803 (r), 798 (r), 824 (r), 658 (r)<br>394 (r), 669 (r), 934 (r), 812 (r)<br>733 (r), 810 (r), 667 (r), 861 (r)<br>663 (r), 820 (r), 850 (r), 833 (r)<br>676 (r), 640 (r), 821 (r), 638 (r)<br>659 (r)                                                                                                                                                                           |
| 913. BD* ( 1) C 10-Ru 51      | 0.32707     | 0.11050     | 912 (g), 902 (g), 882 (r), 916 (g)<br>805 (r), 753 (g), 309 (g), 796 (r)<br>910 (v), 732 (r), 759 (g), 660 (r)<br>789 (g), 772 (g), 881 (r), 785 (g)<br>803 (r), 849 (r), 847 (r), 846 (r)<br>926 (r), 797 (r), 850 (r), 658 (r)<br>825 (r), 669 (r), 801 (r), 638 (r)<br>934 (r), 848 (r), 798 (r), 804 (r)<br>667 (r), 662 (r), 570 (r), 812 (r)<br>659 (r), 568 (r), 824 (r), 860 (r)<br>845 (r), 640 (r), 852 (r), 861 (r)                                                                                                                                                |
| 914. BD* ( 1) C 10- O 48      | 0.20527     | -0.01403    | 909 (r), 910 (r), 915 (g), 704 (g)<br>308 (g), 304 (g), 916 (g), 703 (g)<br>307 (g), 912 (v), 805 (r), 926 (r)<br>796 (r), 853 (r), 861 (r), 850 (r)<br>860 (r)                                                                                                                                                                                                                                                                                                                                                                                                               |
| 915. BD* ( 2) C 10- O 48      | 0.23397     | -0.00929    | 909 (r), 307 (g), 902 (v), 914 (g)<br>910 (r), 916 (g), 703 (g), 912 (v)<br>304 (g), 704 (g), 864 (r), 805 (r)<br>853 (r), 640 (r), 796 (r), 803 (r)<br>850 (r)                                                                                                                                                                                                                                                                                                                                                                                                               |
| 916. BD* ( 3) C 10- O 48      | 0.01837     | 0.59117     |                                                                                                                                                                                                                                                                                                                                                                                                                                                                                                                                                                               |
| -----                         |             |             |                                                                                                                                                                                                                                                                                                                                                                                                                                                                                                                                                                               |
| Total Lewis                   | 147.83322   | ( 96.8961%) |                                                                                                                                                                                                                                                                                                                                                                                                                                                                                                                                                                               |
| Valence non-Lewis             | 4.44154     | ( 2.9112%)  |                                                                                                                                                                                                                                                                                                                                                                                                                                                                                                                                                                               |
| Rydberg non-Lewis             | 0.29397     | ( 0.1927%)  |                                                                                                                                                                                                                                                                                                                                                                                                                                                                                                                                                                               |
| -----                         |             |             |                                                                                                                                                                                                                                                                                                                                                                                                                                                                                                                                                                               |
| Total unit                    | 1 152.56873 | (100.0000%) |                                                                                                                                                                                                                                                                                                                                                                                                                                                                                                                                                                               |
| Charge unit                   | 1 0.43127   |             |                                                                                                                                                                                                                                                                                                                                                                                                                                                                                                                                                                               |
| -----                         |             |             |                                                                                                                                                                                                                                                                                                                                                                                                                                                                                                                                                                               |
| Molecular unit 2 (C13H8NO2Ru) |             |             |                                                                                                                                                                                                                                                                                                                                                                                                                                                                                                                                                                               |
| 16. BD ( 1) C 6- O 46         | 1.99654     | -0.40277    | 825 (v), 805 (v), 798 (v), 848 (r)                                                                                                                                                                                                                                                                                                                                                                                                                                                                                                                                            |
| 17. BD ( 2) C 6- O 46         | 1.99612     | -0.38941    | 796 (v), 184 (r), 853 (r), 186 (r)<br>720 (r)                                                                                                                                                                                                                                                                                                                                                                                                                                                                                                                                 |
| 18. BD ( 3) C 6- O 46         | 1.99465     | -1.09120    | 825 (v), 805 (v), 815 (v), 833 (v)<br>820 (v), 821 (v), 824 (v), 803 (v)<br>836 (v), 819 (v), 837 (v), 807 (v)<br>796 (v), 243 (g), 818 (v), 817 (v)<br>800 (v), 257 (g), 802 (v), 245 (g)<br>828 (v), 811 (v), 799 (v), 249 (g)<br>797 (v), 804 (v), 810 (v), 256 (g)<br>829 (v), 251 (g), 809 (v), 733 (r)<br>840 (v), 279 (r), 832 (v), 848 (r)<br>840 (r), 188 (r), 853 (r), 846 (r)<br>560 (r), 766 (r), 184 (r), 748 (r)<br>847 (r), 638 (r), 852 (r), 661 (r)<br>668 (r), 754 (r), 190 (r), 761 (r)<br>850 (r), 169 (r), 861 (r), 776 (r)<br>750 (r), 185 (r), 642 (r) |
| 19. BD ( 1) C 6-Ru 52         | 1.92504     | -0.53561    | 805 (g), 796 (g), 825 (g), 797 (g)<br>926 (g), 881 (g), 824 (g), 812 (g)<br>798 (g), 801 (g), 803 (g), 815 (g)<br>810 (g), 927 (v), 879 (v), 660 (r)<br>270 (g), 828 (g), 880 (v), 675 (v)<br>814 (v), 279 (v), 393 (v), 846 (r)<br>818 (g), 676 (v), 848 (r), 733 (r)<br>882 (g), 611 (g), 428 (r), 847 (r)<br>257 (g), 273 (g), 885 (g), 849 (r)<br>850 (r), 661 (r), 560 (r), 659 (r)<br>558 (r), 184 (r), 845 (r), 662 (r)<br>669 (r), 658 (r), 756 (r), 751 (r)<br>860 (r), 912 (r), 858 (r), 902 (r)                                                                    |

|                        |         |          |  |                                    |
|------------------------|---------|----------|--|------------------------------------|
|                        |         |          |  | 638 (x), 188 (x), 861 (x), 934 (x) |
|                        |         |          |  | 672 (x), 318 (x), 755 (x), 757 (x) |
|                        |         |          |  | 664 (x), 667 (x), 758 (x), 792 (x) |
|                        |         |          |  | 559 (x), 671 (x), 186 (x), 190 (x) |
|                        |         |          |  | 670 (x)                            |
| 23. BD ( 1) C 8- O 47  | 1.99736 | -0.38931 |  | 796 (v), 755 (x), 757 (x), 756 (x) |
|                        |         |          |  | 776 (x), 780 (x), 764 (x), 748 (x) |
|                        |         |          |  | 777 (x), 770 (x), 767 (x), 785 (x) |
|                        |         |          |  | 792 (x), 847 (x), 759 (x), 769 (x) |
| 24. BD ( 2) C 8- O 47  | 1.99750 | -0.38766 |  | 798 (v), 796 (v)                   |
| 25. BD ( 3) C 8- O 47  | 1.99516 | -1.09960 |  | 805 (v), 825 (v), 815 (v), 824 (v) |
|                        |         |          |  | 833 (v), 820 (v), 821 (v), 818 (v) |
|                        |         |          |  | 836 (v), 819 (v), 837 (v), 796 (v) |
|                        |         |          |  | 800 (v), 817 (v), 273 (g), 812 (v) |
|                        |         |          |  | 803 (v), 807 (v), 280 (g), 840 (v) |
|                        |         |          |  | 816 (v), 847 (x), 287 (g), 828 (v) |
|                        |         |          |  | 797 (v), 798 (v), 841 (v), 286 (g) |
|                        |         |          |  | 808 (v), 281 (g), 640 (x), 560 (x) |
|                        |         |          |  | 757 (x), 853 (x), 848 (x), 846 (x) |
|                        |         |          |  | 856 (x), 755 (x), 659 (x), 767 (x) |
|                        |         |          |  | 766 (x), 765 (x), 852 (x), 753 (x) |
|                        |         |          |  | 760 (x), 764 (x), 763 (x), 780 (x) |
|                        |         |          |  | 777 (x), 752 (x), 850 (x), 861 (x) |
|                        |         |          |  | 785 (x), 188 (x), 750 (x), 776 (x) |
|                        |         |          |  | 660 (x), 169 (x)                   |
| 26. BD ( 1) C 8-Ru 52  | 1.91979 | -0.53786 |  | 805 (g), 796 (g), 825 (g), 797 (g) |
|                        |         |          |  | 815 (g), 824 (g), 882 (g), 926 (g) |
|                        |         |          |  | 803 (g), 798 (g), 812 (g), 811 (g) |
|                        |         |          |  | 810 (g), 818 (g), 801 (g), 799 (g) |
|                        |         |          |  | 245 (v), 814 (g), 885 (v), 828 (g) |
|                        |         |          |  | 883 (v), 733 (x), 691 (v), 249 (v) |
|                        |         |          |  | 884 (v), 243 (v), 804 (g), 881 (g) |
|                        |         |          |  | 428 (x), 244 (v), 338 (x), 167 (v) |
|                        |         |          |  | 250 (v), 660 (x), 921 (x), 394 (v) |
|                        |         |          |  | 928 (v), 690 (v), 404 (v), 560 (x) |
|                        |         |          |  | 807 (g), 820 (g), 865 (x), 927 (v) |
|                        |         |          |  | 809 (g), 247 (v), 287 (g), 286 (g) |
|                        |         |          |  | 847 (x), 661 (x), 669 (x), 640 (x) |
|                        |         |          |  | 558 (x), 846 (x), 853 (x), 848 (x) |
|                        |         |          |  | 667 (x), 755 (x), 638 (x), 765 (x) |
|                        |         |          |  | 861 (x), 757 (x), 672 (x), 766 (x) |
|                        |         |          |  | 856 (x), 668 (x), 662 (x), 760 (x) |
|                        |         |          |  | 671 (x), 751 (x), 658 (x), 767 (x) |
|                        |         |          |  | 758 (x), 860 (x), 852 (x), 184 (x) |
|                        |         |          |  | 188 (x), 850 (x), 764 (x), 720 (x) |
|                        |         |          |  | 774 (x), 659 (x)                   |
| 37. BD ( 1) C 12- C 14 | 1.98338 | -0.67171 |  | 805 (x), 825 (x), 919 (v), 733 (v) |
|                        |         |          |  | 796 (x), 815 (x), 469 (v), 867 (g) |
|                        |         |          |  | 882 (x), 865 (g), 797 (x), 818 (x) |
|                        |         |          |  | 847 (x)                            |
| 38. BD ( 2) C 12- C 14 | 1.64997 | -0.26079 |  | 918 (v), 922 (v), 470 (v), 734 (v) |
|                        |         |          |  | 864 (g), 915 (x)                   |
| 39. BD ( 1) C 12- H 29 | 1.97414 | -0.49940 |  | 805 (x), 921 (v), 825 (x), 867 (v) |
|                        |         |          |  | 733 (v), 796 (x), 363 (v), 797 (x) |
|                        |         |          |  | 818 (x), 815 (x), 824 (x), 798 (x) |
|                        |         |          |  | 799 (x), 767 (x), 757 (x), 755 (x) |
|                        |         |          |  | 750 (x), 748 (x), 776 (x), 780 (x) |
|                        |         |          |  | 777 (x), 847 (x), 764 (x), 915 (x) |
|                        |         |          |  | 785 (x), 760 (x), 640 (x), 762 (x) |
|                        |         |          |  | 759 (x), 752 (x), 772 (x), 789 (x) |
|                        |         |          |  | 763 (x), 770 (x), 303 (x), 848 (x) |
|                        |         |          |  | 219 (x), 773 (x), 638 (x), 661 (x) |
|                        |         |          |  | 213 (x), 753 (x), 768 (x), 660 (x) |
| 40. BD ( 1) C 12- N 50 | 1.98629 | -0.78518 |  | 805 (x), 825 (x), 882 (x), 924 (v) |
|                        |         |          |  | 797 (x), 818 (x), 801 (x), 798 (x) |
|                        |         |          |  | 868 (v), 815 (x), 833 (x), 455 (v) |
|                        |         |          |  | 820 (x), 821 (x), 824 (x), 863 (g) |
|                        |         |          |  | 347 (g), 736 (g), 365 (v), 836 (x) |
|                        |         |          |  | 369 (v), 346 (g), 803 (x), 799 (x) |
|                        |         |          |  | 921 (g), 819 (x), 453 (v), 811 (x) |
|                        |         |          |  | 847 (x), 659 (x), 934 (x), 757 (x) |
|                        |         |          |  | 767 (x), 852 (x), 755 (x), 780 (x) |
|                        |         |          |  | 776 (x), 750 (x), 753 (x), 762 (x) |
|                        |         |          |  | 560 (x), 777 (x), 748 (x), 785 (v) |
| 43. BD ( 1) C 14- C 21 | 1.98417 | -0.66167 |  | 866 (v), 920 (v), 805 (x), 500 (v) |
|                        |         |          |  | 863 (g), 917 (g)                   |
| 44. BD ( 1) C 14- H 31 | 1.97619 | -0.49612 |  | 865 (v), 917 (v), 468 (v), 805 (x) |
|                        |         |          |  | 333 (v)                            |
| 47. BD ( 1) C 16- C 18 | 1.97959 | -0.62183 |  | 805 (v), 825 (v), 803 (v), 815 (v) |
|                        |         |          |  | 924 (v), 824 (v), 796 (v), 833 (v) |
|                        |         |          |  | 820 (v), 797 (v), 821 (v), 930 (v) |
|                        |         |          |  | 836 (v), 931 (g), 515 (v), 806 (v) |
|                        |         |          |  | 819 (v), 812 (v), 817 (v), 837 (v) |
|                        |         |          |  | 396 (g), 733 (x), 437 (g), 487 (v) |
|                        |         |          |  | 818 (v), 483 (v), 933 (g), 927 (g) |
|                        |         |          |  | 822 (v), 435 (g), 840 (v), 802 (v) |
|                        |         |          |  | 640 (x), 848 (x), 659 (x), 846 (x) |
|                        |         |          |  | 560 (x), 658 (x), 642 (x)          |
| 48. BD ( 1) C 16- C 22 | 1.97140 | -0.61125 |  | 805 (v), 796 (v), 825 (v), 923 (v) |
|                        |         |          |  | 933 (v), 871 (v), 925 (g), 818 (v) |
|                        |         |          |  | 824 (v), 815 (v), 924 (g), 425 (v) |
|                        |         |          |  | 496 (g), 531 (v), 497 (g), 798 (v) |
|                        |         |          |  | 530 (v), 491 (g), 833 (v), 820 (v) |
|                        |         |          |  | 395 (g), 453 (v), 533 (v), 821 (v) |
|                        |         |          |  | 429 (v), 802 (v), 928 (g), 801 (v) |
|                        |         |          |  | 846 (x), 848 (x), 188 (x)          |
| 49. BD ( 1) C 16-Ru 52 | 1.85838 | -0.36774 |  | 805 (g), 796 (g), 797 (g), 825 (g) |
|                        |         |          |  | 882 (g), 881 (g), 798 (g), 824 (g) |
|                        |         |          |  | 815 (g), 803 (g), 925 (v), 931 (v) |
|                        |         |          |  | 799 (g), 811 (g), 812 (g), 818 (g) |
|                        |         |          |  | 245 (v), 814 (g), 801 (g), 828 (g) |
|                        |         |          |  | 885 (v), 814 (g), 865 (x), 733 (x) |
|                        |         |          |  | 878 (v), 243 (v), 926 (g), 425 (v) |
|                        |         |          |  | 846 (x), 848 (x), 884 (x), 847 (x) |
|                        |         |          |  | 249 (v), 880 (v), 274 (v), 933 (v) |
|                        |         |          |  | 279 (v), 338 (x), 273 (v), 807 (g) |
|                        |         |          |  | 691 (v), 640 (x), 809 (g), 250 (v) |
|                        |         |          |  | 560 (x), 404 (g), 858 (x), 924 (v) |
|                        |         |          |  | 804 (g), 923 (x), 428 (x), 845 (x) |
|                        |         |          |  | 808 (g), 423 (v), 659 (x), 660 (x) |
|                        |         |          |  | 672 (g), 421 (v), 849 (x), 558 (x) |
|                        |         |          |  | 670 (x), 668 (x), 753 (x), 663 (x) |
|                        |         |          |  | 639 (x), 666 (x), 664 (x), 642 (x) |
|                        |         |          |  | 850 (x), 188 (x), 641 (x), 902 (x) |
|                        |         |          |  | 665 (x), 720 (x), 860 (x), 853 (x) |
|                        |         |          |  | 184 (x), 662 (x), 858 (x), 757 (x) |

|                        |         |            |                                                                                                                                                                                                                                                                                                                                                               |
|------------------------|---------|------------|---------------------------------------------------------------------------------------------------------------------------------------------------------------------------------------------------------------------------------------------------------------------------------------------------------------------------------------------------------------|
| 53. BD ( 1) C 18- C 24 | 1.97863 | -0.62434   | 805 (x), 926 (v), 872 (v), 825 (x)<br>928 (g), 545 (v), 929 (g), 393 (v)<br>815 (x)                                                                                                                                                                                                                                                                           |
| 54. BD ( 2) C 18- C 24 | 1.65806 | -0.21947   | 167 (v), 870 (v), 544 (v), 394 (v)<br>424 (g)                                                                                                                                                                                                                                                                                                                 |
| 55. BD ( 1) C 18- H 32 | 1.97499 | -0.45115   | 805 (x), 927 (v), 929 (v), 393 (v)<br>825 (x), 513 (v)                                                                                                                                                                                                                                                                                                        |
| 57. BD ( 1) C 20- C 22 | 1.97250 | -0.60600   | 805 (x), 865 (v), 928 (v), 869 (v)<br>917 (v), 796 (x), 825 (x), 927 (g)<br>923 (g), 528 (v), 925 (g), 498 (v)<br>393 (v), 733 (v), 802 (x)                                                                                                                                                                                                                   |
| 58. BD ( 1) C 20- C 23 | 1.97966 | -0.65700   | 805 (x), 919 (v), 927 (v), 469 (v)<br>825 (x), 924 (g), 485 (v), 917 (g)<br>796 (x), 882 (x)                                                                                                                                                                                                                                                                  |
| 59. BD ( 1) C 20- N 50 | 1.98126 | -0.76235   | 805 (x), 796 (x), 882 (x), 825 (x)<br>925 (v), 866 (v), 335 (v), 920 (v)<br>735 (g), 467 (g), 923 (g), 818 (x)<br>815 (x), 466 (g), 824 (x), 924 (g)<br>505 (v), 461 (g), 503 (v), 846 (x)<br>748 (x), 776 (x), 755 (x), 780 (x)<br>848 (x), 638 (x), 188 (x), 777 (x)<br>785 (x), 767 (x), 757 (x), 750 (x)<br>759 (x), 764 (x), 763 (x), 772 (x)<br>789 (x) |
| 60. BD ( 2) C 20- N 50 | 1.71962 | -0.30257   | 147 (v), 864 (v), 918 (v), 334 (v)<br>499 (v), 797 (x), 484 (v), 734 (g)<br>805 (x), 853 (x), 850 (x), 861 (x)<br>860 (x), 750 (x), 767 (x), 748 (x)<br>852 (x), 776 (x), 777 (x), 858 (x)<br>766 (x), 780 (x), 762 (x), 785 (x)<br>759 (x)                                                                                                                   |
| 61. BD ( 1) C 21- C 23 | 1.98409 | -0.66890   | 805 (x), 924 (v), 868 (v), 923 (g)<br>365 (v), 867 (g), 453 (v)                                                                                                                                                                                                                                                                                               |
| 62. BD ( 2) C 21- C 23 | 1.66342 | -0.25801   | 922 (v), 864 (v), 364 (v), 458 (v)                                                                                                                                                                                                                                                                                                                            |
| 63. BD ( 1) C 21- H 37 | 1.97829 | -0.49755   | 923 (v), 863 (v), 498 (v), 363 (v)                                                                                                                                                                                                                                                                                                                            |
| 64. BD ( 1) C 22- C 25 | 1.97412 | -0.62449   | 805 (x), 926 (v), 921 (v), 872 (v)<br>927 (g), 545 (v), 455 (v), 869 (g)<br>924 (g), 825 (x), 395 (v)                                                                                                                                                                                                                                                         |
| 65. BD ( 1) C 23- H 38 | 1.97410 | -0.49499   | 921 (v), 867 (v), 453 (v), 805 (x)<br>468 (v)                                                                                                                                                                                                                                                                                                                 |
| 66. BD ( 1) C 24- C 26 | 1.98460 | -0.62510   | 805 (x), 871 (v), 933 (v), 530 (v)<br>869 (g), 931 (g), 426 (v)                                                                                                                                                                                                                                                                                               |
| 67. BD ( 1) C 24- H 36 | 1.97665 | -0.46147   | 928 (v), 869 (v), 805 (x), 423 (v)<br>543 (v)                                                                                                                                                                                                                                                                                                                 |
| 68. BD ( 1) C 25- C 26 | 1.98339 | -0.63379   | 924 (v), 930 (v), 805 (x), 925 (g)<br>515 (v), 929 (g), 483 (v)                                                                                                                                                                                                                                                                                               |
| 69. BD ( 2) C 25- C 26 | 1.69282 | -0.22632   | 147 (v), 932 (v), 514 (v), 484 (v)                                                                                                                                                                                                                                                                                                                            |
| 70. BD ( 1) C 25- H 39 | 1.97485 | -0.47183   | 927 (v), 929 (v), 483 (v), 543 (v)<br>805 (x)                                                                                                                                                                                                                                                                                                                 |
| 71. BD ( 1) C 26- H 40 | 1.97737 | -0.46429   | 925 (v), 931 (v), 528 (v), 513 (v)                                                                                                                                                                                                                                                                                                                            |
| 78. CR ( 1) C 6        | 1.99945 | -9.89695   | 676 (v)                                                                                                                                                                                                                                                                                                                                                       |
| 80. CR ( 1) C 8        | 1.99944 | -9.90184   | 691 (v)                                                                                                                                                                                                                                                                                                                                                       |
| 84. CR ( 1) C 12       | 1.99935 | -9.83915   | 921 (v), 365 (v), 363 (v)                                                                                                                                                                                                                                                                                                                                     |
| 86. CR ( 1) C 14       | 1.99935 | -9.79966   | 469 (v), 336 (v), 865 (v), 335 (v)                                                                                                                                                                                                                                                                                                                            |
| 88. CR ( 1) C 16       | 1.99908 | -9.78226   | 425 (v), 485 (v), 925 (v), 924 (v)<br>931 (v), 926 (g), 483 (v)                                                                                                                                                                                                                                                                                               |
| 90. CR ( 1) C 18       | 1.99930 | -9.76181   | 395 (v), 926 (v), 515 (v), 929 (v)                                                                                                                                                                                                                                                                                                                            |
| 92. CR ( 1) C 20       | 1.99926 | -9.84023   | 865 (v), 927 (v), 925 (v), 498 (v)<br>483 (v), 735 (v)                                                                                                                                                                                                                                                                                                        |
| 93. CR ( 1) C 21       | 1.99938 | -9.80787   | 500 (v), 365 (v), 923 (v)                                                                                                                                                                                                                                                                                                                                     |
| 94. CR ( 1) C 22       | 1.99918 | -9.77704   | 923 (v), 395 (v), 926 (v), 530 (v)<br>453 (v), 393 (v), 921 (v), 528 (v)                                                                                                                                                                                                                                                                                      |
| 95. CR ( 1) C 23       | 1.99929 | -9.79887   | 469 (v), 455 (v), 924 (v), 921 (v)                                                                                                                                                                                                                                                                                                                            |
| 96. CR ( 1) C 24       | 1.99937 | -9.77170   | 928 (v), 545 (v), 425 (v), 426 (v)                                                                                                                                                                                                                                                                                                                            |
| 97. CR ( 1) C 25       | 1.99930 | -9.77514   | 545 (v), 485 (v), 927 (v), 924 (v)                                                                                                                                                                                                                                                                                                                            |
| 98. CR ( 1) C 26       | 1.99937 | -9.76826   | 530 (v), 515 (v), 925 (v)                                                                                                                                                                                                                                                                                                                                     |
| 101. CR ( 1) O 46      | 1.99980 | -18.58851  | 243 (v), 882 (v)                                                                                                                                                                                                                                                                                                                                              |
| 102. CR ( 1) O 47      | 1.99979 | -18.58577  | 273 (v), 881 (v)                                                                                                                                                                                                                                                                                                                                              |
| 105. CR ( 1) N 50      | 1.99947 | -13.89392  | 882 (x), 335 (v), 453 (v), 455 (v)<br>333 (v)                                                                                                                                                                                                                                                                                                                 |
| 124. CR ( 1) Ru 52     | 2.00000 | -825.13895 |                                                                                                                                                                                                                                                                                                                                                               |
| 125. CR ( 2) Ru 52     | 2.00000 | -114.72811 | 828 (g), 824 (g), 836 (g), 820 (g)<br>885 (v), 880 (v)                                                                                                                                                                                                                                                                                                        |
| 126. CR ( 3) Ru 52     | 1.99999 | -21.89627  | 824 (g), 828 (g), 885 (v), 880 (v)<br>836 (g), 805 (g), 820 (g), 797 (g)<br>815 (g), 833 (g), 796 (g), 928 (v)<br>810 (g), 926 (g), 812 (g), 865 (x)<br>818 (g), 927 (v), 921 (x), 803 (g)<br>811 (g), 825 (g), 807 (g), 848 (x)<br>846 (x), 847 (x), 853 (x), 913 (x)                                                                                        |
| 127. CR ( 4) Ru 52     | 1.98735 | -4.61241   | 885 (v), 880 (v), 928 (v), 243 (v)<br>926 (g), 865 (x), 273 (v), 921 (x)<br>927 (v), 828 (g), 833 (g), 805 (g)<br>821 (g), 913 (x), 902 (x)                                                                                                                                                                                                                   |
| 128. CR ( 5) Ru 52     | 2.00000 | -91.94240  |                                                                                                                                                                                                                                                                                                                                                               |
| 129. CR ( 6) Ru 52     | 2.00000 | -28.66704  |                                                                                                                                                                                                                                                                                                                                                               |
| 130. CR ( 7) Ru 52     | 1.99242 | -1.84537   | 882 (g), 881 (g), 885 (v), 880 (v)<br>879 (v), 934 (x)                                                                                                                                                                                                                                                                                                        |
| 131. CR ( 8) Ru 52     | 2.00000 | -91.94220  |                                                                                                                                                                                                                                                                                                                                                               |
| 132. CR ( 9) Ru 52     | 2.00000 | -28.66665  |                                                                                                                                                                                                                                                                                                                                                               |
| 133. CR (10) Ru 52     | 1.99491 | -1.84707   | 825 (g), 881 (g), 926 (g), 805 (g)<br>882 (g), 884 (v), 880 (v), 878 (v)<br>934 (x)                                                                                                                                                                                                                                                                           |
| 134. CR (11) Ru 52     | 2.00000 | -91.94148  |                                                                                                                                                                                                                                                                                                                                                               |
| 135. CR (12) Ru 52     | 2.00000 | -28.66563  |                                                                                                                                                                                                                                                                                                                                                               |
| 136. CR (13) Ru 52     | 1.99309 | -1.84194   | 926 (g), 881 (g), 882 (g), 883 (v)<br>880 (v)                                                                                                                                                                                                                                                                                                                 |
| 137. CR (14) Ru 52     | 2.00000 | -10.09767  |                                                                                                                                                                                                                                                                                                                                                               |
| 138. CR (15) Ru 52     | 2.00000 | -10.09661  |                                                                                                                                                                                                                                                                                                                                                               |
| 139. CR (16) Ru 52     | 2.00000 | -10.09741  |                                                                                                                                                                                                                                                                                                                                                               |
| 140. CR (17) Ru 52     | 2.00000 | -10.09690  |                                                                                                                                                                                                                                                                                                                                                               |
| 141. CR (18) Ru 52     | 2.00000 | -10.09523  |                                                                                                                                                                                                                                                                                                                                                               |
| 147. LP ( 1) C 22      | 1.05144 | -0.10580   | 167 (v), 922 (v), 870 (v), 529 (v)<br>484 (g), 394 (v), 457 (v), 932 (x)<br>805 (x), 243 (v), 882 (v), 796 (x)<br>251 (v), 250 (v), 825 (x)                                                                                                                                                                                                                   |
| 152. LP ( 1) O 46      | 1.97792 | -0.68287   | 273 (v), 805 (x), 881 (v), 825 (x)<br>274 (v), 280 (v), 796 (x)                                                                                                                                                                                                                                                                                               |
| 153. LP ( 1) O 47      | 1.97818 | -0.68793   | 882 (x), 805 (x), 796 (x), 825 (x)<br>923 (v), 863 (v), 797 (x), 866 (v)<br>453 (v), 333 (v), 824 (x), 926 (v)<br>815 (x), 924 (x), 928 (x), 798 (x)<br>818 (x), 801 (x), 879 (x), 811 (x)<br>273 (x), 459 (v), 338 (v), 455 (v)<br>880 (x), 820 (x), 833 (x), 807 (x)<br>925 (x), 821 (x), 846 (x), 848 (x)                                                  |

|                    |         |          |                                    |
|--------------------|---------|----------|------------------------------------|
|                    |         |          | 853 (r), 560 (r), 748 (r), 188 (r) |
|                    |         |          | 776 (r), 766 (r), 638 (r), 913 (r) |
|                    |         |          | 659 (r), 750 (r), 558 (r), 780 (r) |
|                    |         |          | 658 (r)                            |
| 160. LP ( 1) Ru 52 | 1.77295 | -0.20548 | 796 (g), 883 (v), 884 (v), 167 (v) |
|                    |         |          | 878 (v), 735 (r), 246 (v), 805 (g) |
|                    |         |          | 395 (v), 659 (r), 928 (v), 755 (r) |
|                    |         |          | 394 (v), 467 (r), 865 (r), 757 (r) |
|                    |         |          | 921 (r), 776 (r), 780 (r), 767 (r) |
|                    |         |          | 748 (r), 777 (r), 661 (r), 756 (r) |
|                    |         |          | 764 (r), 785 (r), 668 (r), 848 (r) |
|                    |         |          | 759 (r), 750 (r), 846 (r), 772 (r) |
|                    |         |          | 789 (r), 658 (r), 760 (r), 770 (r) |
|                    |         |          | 934 (r), 660 (r), 763 (r), 188 (r) |
|                    |         |          | 768 (r), 561 (r), 773 (r), 765 (r) |
|                    |         |          | 762 (r), 761 (r), 792 (r), 219 (r) |
|                    |         |          | 383 (r), 646 (r), 213 (r), 856 (r) |
|                    |         |          | 788 (r), 706 (r), 847 (r), 793 (r) |
|                    |         |          | 293 (r), 769 (r), 752 (r), 664 (r) |
|                    |         |          | 303 (r), 640 (r), 663 (r), 638 (r) |
|                    |         |          | 329 (r)                            |
| 161. LP ( 2) Ru 52 | 1.71317 | -0.20834 | 878 (v), 167 (v), 805 (g), 796 (g) |
|                    |         |          | 884 (v), 276 (v), 883 (v), 797 (g) |
|                    |         |          | 394 (v), 755 (r), 879 (v), 776 (r) |
|                    |         |          | 756 (r), 757 (r), 780 (r), 246 (v) |
|                    |         |          | 777 (r), 926 (g), 764 (r), 767 (r) |
|                    |         |          | 785 (r), 770 (r), 748 (r), 658 (r) |
|                    |         |          | 759 (r), 792 (r), 853 (r), 772 (r) |
|                    |         |          | 789 (r), 750 (r), 769 (r), 761 (r) |
|                    |         |          | 640 (r), 760 (r), 660 (r), 763 (r) |
|                    |         |          | 793 (r), 768 (r), 852 (r), 659 (r) |
|                    |         |          | 845 (r), 773 (r), 219 (r), 847 (r) |
|                    |         |          | 762 (r), 646 (r), 188 (r), 851 (r) |
|                    |         |          | 383 (r), 788 (r), 638 (r), 303 (r) |
|                    |         |          | 213 (r), 309 (r), 765 (r), 861 (r) |
|                    |         |          | 860 (r), 305 (r), 913 (r), 293 (r) |
|                    |         |          | 856 (r), 264 (r), 753 (r), 647 (r) |
|                    |         |          | 329 (r), 313 (r), 850 (r), 667 (r) |
|                    |         |          | 641 (r), 706 (r), 858 (r), 225 (r) |
|                    |         |          | 846 (r), 848 (r), 721 (r), 708 (r) |
|                    |         |          | 639 (r), 752 (r), 310 (r), 758 (r) |
|                    |         |          | 855 (r), 224 (r), 630 (r), 318 (r) |
|                    |         |          | 664 (r), 916 (r), 781 (r)          |
| 162. LP ( 3) Ru 52 | 1.66584 | -0.22141 | 879 (v), 884 (v), 883 (v), 922 (r) |
|                    |         |          | 244 (v), 275 (v), 734 (r), 878 (v) |
|                    |         |          | 818 (g), 797 (g), 844 (r), 756 (r) |
|                    |         |          | 749 (r), 852 (r)                   |
| 167. LP* ( 1) C 16 | 0.89449 | -0.09213 | 147 (v), 932 (v), 424 (v), 394 (g) |
|                    |         |          | 881 (v), 484 (v), 922 (r), 805 (v) |
|                    |         |          | 870 (r), 488 (v), 853 (r), 861 (r) |
|                    |         |          | 850 (r), 860 (r), 852 (r), 912 (r) |
|                    |         |          | 858 (r), 776 (r), 777 (r), 780 (r) |
|                    |         |          | 769 (r), 785 (r), 755 (r), 761 (r) |
| 243. RY* ( 1) C 6  | 0.01383 | 1.48453  |                                    |
| 244. RY* ( 2) C 6  | 0.00533 | 0.86942  |                                    |
| 245. RY* ( 3) C 6  | 0.00381 | 2.60103  |                                    |
| 246. RY* ( 4) C 6  | 0.00295 | 1.60178  |                                    |
| 247. RY* ( 5) C 6  | 0.00172 | 1.82233  |                                    |
| 248. RY* ( 6) C 6  | 0.00149 | 2.33185  |                                    |
| 249. RY* ( 7) C 6  | 0.00025 | 6.25755  |                                    |
| 250. RY* ( 8) C 6  | 0.00010 | 3.87153  |                                    |
| 251. RY* ( 9) C 6  | 0.00008 | 3.03832  |                                    |
| 252. RY* (10) C 6  | 0.00009 | 2.62505  |                                    |
| 253. RY* (11) C 6  | 0.00006 | 1.84138  |                                    |
| 254. RY* (12) C 6  | 0.00003 | 2.65495  |                                    |
| 255. RY* (13) C 6  | 0.00004 | 2.67899  |                                    |
| 256. RY* (14) C 6  | 0.00000 | 45.39379 |                                    |
| 257. RY* (15) C 6  | 0.00000 | 25.46942 |                                    |
| 273. RY* ( 1) C 8  | 0.01434 | 1.35250  |                                    |
| 274. RY* ( 2) C 8  | 0.00419 | 1.95777  |                                    |
| 275. RY* ( 3) C 8  | 0.00407 | 0.97821  |                                    |
| 276. RY* ( 4) C 8  | 0.00310 | 1.84838  |                                    |
| 277. RY* ( 5) C 8  | 0.00188 | 1.88385  |                                    |
| 278. RY* ( 6) C 8  | 0.00166 | 1.97527  |                                    |
| 279. RY* ( 7) C 8  | 0.00022 | 4.33382  |                                    |
| 280. RY* ( 8) C 8  | 0.00013 | 3.99823  |                                    |
| 281. RY* ( 9) C 8  | 0.00009 | 2.77955  |                                    |
| 282. RY* (10) C 8  | 0.00009 | 1.76165  |                                    |
| 283. RY* (11) C 8  | 0.00005 | 3.43689  |                                    |
| 284. RY* (12) C 8  | 0.00003 | 2.71411  |                                    |
| 285. RY* (13) C 8  | 0.00003 | 2.61230  |                                    |
| 286. RY* (14) C 8  | 0.00000 | 45.59659 |                                    |
| 287. RY* (15) C 8  | 0.00000 | 26.60683 |                                    |
| 333. RY* ( 1) C 12 | 0.00634 | 1.50011  |                                    |
| 334. RY* ( 2) C 12 | 0.00511 | 0.65209  |                                    |
| 335. RY* ( 3) C 12 | 0.00238 | 1.69969  |                                    |
| 336. RY* ( 4) C 12 | 0.00135 | 1.30573  |                                    |
| 337. RY* ( 5) C 12 | 0.00063 | 1.78196  |                                    |
| 338. RY* ( 6) C 12 | 0.00031 | 2.77545  |                                    |
| 339. RY* ( 7) C 12 | 0.00013 | 8.65339  |                                    |
| 340. RY* ( 8) C 12 | 0.00011 | 4.20700  |                                    |
| 341. RY* ( 9) C 12 | 0.00009 | 4.77582  |                                    |
| 342. RY* (10) C 12 | 0.00009 | 2.37572  |                                    |
| 343. RY* (11) C 12 | 0.00005 | 4.66817  |                                    |
| 344. RY* (12) C 12 | 0.00002 | 2.62326  |                                    |
| 345. RY* (13) C 12 | 0.00002 | 3.36097  |                                    |
| 346. RY* (14) C 12 | 0.00000 | 40.06670 |                                    |
| 347. RY* (15) C 12 | 0.00000 | 26.15028 |                                    |
| 363. RY* ( 1) C 14 | 0.00281 | 1.67942  |                                    |
| 364. RY* ( 2) C 14 | 0.00220 | 0.57431  |                                    |
| 365. RY* ( 3) C 14 | 0.00111 | 1.85650  |                                    |
| 366. RY* ( 4) C 14 | 0.00061 | 1.15245  |                                    |
| 367. RY* ( 5) C 14 | 0.00035 | 1.81208  |                                    |
| 368. RY* ( 6) C 14 | 0.00012 | 7.87718  |                                    |
| 369. RY* ( 7) C 14 | 0.00010 | 3.73266  |                                    |
| 370. RY* ( 8) C 14 | 0.00007 | 2.17842  |                                    |
| 371. RY* ( 9) C 14 | 0.00004 | 3.14489  |                                    |
| 372. RY* (10) C 14 | 0.00001 | 4.30678  |                                    |
| 373. RY* (11) C 14 | 0.00002 | 2.67554  |                                    |
| 374. RY* (12) C 14 | 0.00001 | 3.62810  |                                    |
| 375. RY* (13) C 14 | 0.00000 | 25.00240 |                                    |
| 376. RY* (14) C 14 | 0.00000 | 39.46694 |                                    |
| 377. RY* (15) C 14 | 0.00001 | 6.59923  |                                    |
| 393. RY* ( 1) C 16 | 0.00830 | 1.03860  |                                    |
| 394. RY* ( 2) C 16 | 0.00746 | 0.60861  |                                    |
| 395. RY* ( 3) C 16 | 0.00567 | 0.97188  |                                    |



|      |     |      |      |         |          |
|------|-----|------|------|---------|----------|
| 396. | RY* | ( 4) | C 16 | 0.00236 | 2.15356  |
| 397. | RY* | ( 5) | C 16 | 0.00045 | 2.16911  |
| 398. | RY* | ( 6) | C 16 | 0.00043 | 2.50405  |
| 399. | RY* | ( 7) | C 16 | 0.00036 | 2.52957  |
| 400. | RY* | ( 8) | C 16 | 0.00030 | 4.33261  |
| 401. | RY* | ( 9) | C 16 | 0.00024 | 13.75692 |
| 402. | RY* | (10) | C 16 | 0.00012 | 3.53994  |
| 403. | RY* | (11) | C 16 | 0.00013 | 3.97440  |
| 404. | RY* | (12) | C 16 | 0.00007 | 2.89469  |
| 405. | RY* | (13) | C 16 | 0.00003 | 3.26697  |
| 406. | RY* | (14) | C 16 | 0.00000 | 26.53375 |
| 407. | RY* | (15) | C 16 | 0.00000 | 39.77919 |
| 423. | RY* | ( 1) | C 18 | 0.00484 | 1.62135  |
| 424. | RY* | ( 2) | C 18 | 0.00292 | 0.47080  |
| 425. | RY* | ( 3) | C 18 | 0.00161 | 1.65062  |
| 426. | RY* | ( 4) | C 18 | 0.00094 | 0.97893  |
| 427. | RY* | ( 5) | C 18 | 0.00033 | 1.80517  |
| 428. | RY* | ( 6) | C 18 | 0.00021 | 2.39840  |
| 429. | RY* | ( 7) | C 18 | 0.00013 | 7.86698  |
| 430. | RY* | ( 8) | C 18 | 0.00007 | 3.67284  |
| 431. | RY* | ( 9) | C 18 | 0.00007 | 3.77453  |
| 432. | RY* | (10) | C 18 | 0.00004 | 4.72609  |
| 433. | RY* | (11) | C 18 | 0.00003 | 4.66849  |
| 434. | RY* | (12) | C 18 | 0.00002 | 3.16630  |
| 435. | RY* | (13) | C 18 | 0.00000 | 40.55771 |
| 436. | RY* | (14) | C 18 | 0.00001 | 2.33264  |
| 437. | RY* | (15) | C 18 | 0.00000 | 26.77984 |
| 453. | RY* | ( 1) | C 20 | 0.00833 | 1.52168  |
| 454. | RY* | ( 2) | C 20 | 0.00511 | 0.60142  |
| 455. | RY* | ( 3) | C 20 | 0.00338 | 1.92095  |
| 456. | RY* | ( 4) | C 20 | 0.00109 | 1.51588  |
| 457. | RY* | ( 5) | C 20 | 0.00103 | 1.73007  |
| 458. | RY* | ( 6) | C 20 | 0.00055 | 1.97699  |
| 459. | RY* | ( 7) | C 20 | 0.00055 | 3.35197  |
| 460. | RY* | ( 8) | C 20 | 0.00020 | 6.55845  |
| 461. | RY* | ( 9) | C 20 | 0.00018 | 8.90968  |
| 462. | RY* | (10) | C 20 | 0.00012 | 3.53233  |
| 463. | RY* | (11) | C 20 | 0.00010 | 5.44512  |
| 464. | RY* | (12) | C 20 | 0.00003 | 2.97276  |
| 465. | RY* | (13) | C 20 | 0.00002 | 3.44541  |
| 466. | RY* | (14) | C 20 | 0.00000 | 41.91461 |
| 467. | RY* | (15) | C 20 | 0.00000 | 23.94290 |
| 468. | RY* | ( 1) | C 21 | 0.00249 | 1.74387  |
| 469. | RY* | ( 2) | C 21 | 0.00153 | 1.71945  |
| 470. | RY* | ( 3) | C 21 | 0.00100 | 0.52900  |
| 471. | RY* | ( 4) | C 21 | 0.00076 | 1.17551  |
| 472. | RY* | ( 5) | C 21 | 0.00051 | 1.81067  |
| 473. | RY* | ( 6) | C 21 | 0.00009 | 3.05722  |
| 474. | RY* | ( 7) | C 21 | 0.00005 | 6.91659  |
| 475. | RY* | ( 8) | C 21 | 0.00003 | 3.89026  |
| 476. | RY* | ( 9) | C 21 | 0.00001 | 5.54769  |
| 477. | RY* | (10) | C 21 | 0.00001 | 4.79608  |
| 478. | RY* | (11) | C 21 | 0.00001 | 2.89046  |
| 479. | RY* | (12) | C 21 | 0.00002 | 3.32838  |
| 480. | RY* | (13) | C 21 | 0.00000 | 35.97075 |
| 481. | RY* | (14) | C 21 | 0.00000 | 30.57715 |
| 482. | RY* | (15) | C 21 | 0.00000 | 2.61863  |
| 483. | RY* | ( 1) | C 22 | 0.00799 | 1.32833  |
| 484. | RY* | ( 2) | C 22 | 0.00436 | 0.52822  |
| 485. | RY* | ( 3) | C 22 | 0.00274 | 1.72767  |
| 486. | RY* | ( 4) | C 22 | 0.00104 | 1.09615  |
| 487. | RY* | ( 5) | C 22 | 0.00051 | 3.60851  |
| 488. | RY* | ( 6) | C 22 | 0.00044 | 1.80119  |
| 489. | RY* | ( 7) | C 22 | 0.00041 | 1.83784  |
| 490. | RY* | ( 8) | C 22 | 0.00021 | 3.96077  |
| 491. | RY* | ( 9) | C 22 | 0.00014 | 13.58449 |
| 492. | RY* | (10) | C 22 | 0.00012 | 4.19138  |
| 493. | RY* | (11) | C 22 | 0.00008 | 3.84726  |
| 494. | RY* | (12) | C 22 | 0.00004 | 2.80446  |
| 495. | RY* | (13) | C 22 | 0.00002 | 2.97114  |
| 496. | RY* | (14) | C 22 | 0.00000 | 25.55774 |
| 497. | RY* | (15) | C 22 | 0.00000 | 41.74951 |
| 498. | RY* | ( 1) | C 23 | 0.00304 | 1.52141  |
| 499. | RY* | ( 2) | C 23 | 0.00178 | 0.45940  |
| 500. | RY* | ( 3) | C 23 | 0.00090 | 1.64585  |

(1) Analytical Frequencies

=====  
=== CALCULATE ANALYTICAL SECOND DERIVATIVES OF THE ENERGY ===  
=====

-----  
This Analytical Second Derivatives Program  
was written for ADF by

Stephen K. Wolff

Scientific Computing & Modelling

Vrije University  
Theoretical Chemistry  
De Boelelaan 1083  
1081 HV Amsterdam  
The Netherlands

-----  
Date last modified:  
JUNE 2006

References:  
=====

Attila Berces, Ross M. Dickson, Liangyou Fan  
Heiko Jacobsen, David Swerhone, Tom Ziegler,  
Computer Physics Communications 100 (1997) 247.

Heiko Jacobsen, Attila Berces



|             |             |            |
|-------------|-------------|------------|
| 661.467741  | 20.416933   | 3.385145   |
| 712.670415  | 32.064975   | 5.727930   |
| 714.407389  | 31.229450   | 5.592273   |
| 721.940685  | 139.653227  | 25.271473  |
| 723.302966  | 100.636745  | 18.245463  |
| 736.039749  | 377.429292  | 69.632974  |
| 741.925291  | 369.572827  | 68.728723  |
| 756.846182  | 1.266304    | 0.240228   |
| 756.953665  | 2.973468    | 0.564171   |
| 778.456525  | 12.015067   | 2.344437   |
| 783.745629  | 26.704186   | 5.246051   |
| 784.230975  | 43.915050   | 8.632477   |
| 843.365824  | 2.542464    | 0.537463   |
| 844.243031  | 3.649757    | 0.772342   |
| 855.401785  | 4.772057    | 1.023184   |
| 863.888324  | 6.716052    | 1.454286   |
| 920.572915  | 0.478578    | 0.110430   |
| 920.727556  | 0.188586    | 0.043523   |
| 931.117337  | 3.851339    | 0.898865   |
| 960.855396  | 0.910193    | 0.219215   |
| 961.210179  | 0.349496    | 0.084205   |
| 966.206642  | 6.529215    | 1.581281   |
| 970.032506  | 0.278060    | 0.067609   |
| 982.174082  | 18.629925   | 4.586460   |
| 1001.047760 | 21.743155   | 5.455762   |
| 1003.265426 | 20.784709   | 5.226824   |
| 1007.522492 | 102.839040  | 25.971129  |
| 1008.530594 | 89.414568   | 22.603486  |
| 1018.519587 | 22.615236   | 5.773625   |
| 1019.392150 | 10.070199   | 2.573104   |
| 1044.588303 | 5.978481    | 1.565359   |
| 1048.669094 | 5.900318    | 1.550929   |
| 1052.404964 | 53.775955   | 14.185645  |
| 1053.101567 | 35.067504   | 9.256636   |
| 1097.552277 | 5.383339    | 1.481000   |
| 1100.308542 | 9.865009    | 2.720759   |
| 1116.261171 | 2.027324    | 0.567240   |
| 1118.075117 | 1.032162    | 0.289266   |
| 1150.236809 | 17.520519   | 5.051406   |
| 1151.247882 | 12.547785   | 3.620879   |
| 1157.445264 | 20.432828   | 5.927984   |
| 1158.275342 | 20.722765   | 6.016412   |
| 1234.979821 | 6.511505    | 2.015669   |
| 1235.477726 | 30.654966   | 9.493226   |
| 1266.328413 | 54.582545   | 17.325198  |
| 1269.095902 | 49.465778   | 15.735384  |
| 1287.020236 | 9.171854    | 2.958834   |
| 1288.897435 | 5.648968    | 1.825011   |
| 1299.513603 | 71.177426   | 23.184684  |
| 1299.794663 | 28.079632   | 9.148381   |
| 1311.286606 | 7.062372    | 2.321273   |
| 1314.535278 | 17.024419   | 5.609480   |
| 1411.029525 | 59.952693   | 21.204247  |
| 1412.752003 | 44.339367   | 15.701223  |
| 1427.656057 | 9.804737    | 3.508630   |
| 1428.565164 | 8.204466    | 2.937842   |
| 1441.256469 | 22.625313   | 8.173610   |
| 1444.204525 | 34.369657   | 12.441764  |
| 1465.325316 | 209.656419  | 77.005241  |
| 1467.795792 | 192.776714  | 70.924826  |
| 1540.689492 | 26.090493   | 10.075706  |
| 1541.006631 | 28.705914   | 11.088019  |
| 1555.044216 | 78.560054   | 30.621227  |
| 1555.675837 | 72.071272   | 28.103432  |
| 1570.960989 | 103.003655  | 40.559828  |
| 1572.184960 | 117.224778  | 46.195655  |
| 1592.958240 | 133.879925  | 53.456180  |
| 1594.496934 | 139.281103  | 55.666505  |
| 1928.911602 | 1256.616488 | 607.565562 |
| 1933.743433 | 1367.650659 | 662.906231 |
| 1990.120240 | 1710.920101 | 853.467751 |
| 1995.907752 | 1085.555613 | 543.088507 |
| 3081.741886 | 1.798427    | 1.389207   |
| 3082.993255 | 1.589595    | 1.228392   |
| 3090.679949 | 9.935450    | 7.696967   |
| 3091.328450 | 9.020422    | 6.989564   |
| 3096.912544 | 28.321130   | 21.984550  |
| 3101.935435 | 3.238378    | 2.517899   |
| 3102.452862 | 10.800536   | 8.399019   |
| 3104.096646 | 12.281479   | 9.555732   |
| 3104.764752 | 12.276533   | 9.553940   |
| 3114.263083 | 5.236620    | 4.087751   |
| 3116.507780 | 44.475035   | 34.742621  |
| 3117.480568 | 42.624889   | 33.307734  |
| 3130.181373 | 4.489158    | 3.522188   |
| 3133.793341 | 5.269367    | 4.139109   |
| 3136.459276 | 8.034499    | 6.316501   |
| 3139.292938 | 4.058779    | 3.193783   |
| 3698.479042 | 13.333560   | 12.360822  |

=====  
Statistical Thermal Analysis \*\*\* ideal gas assumed \*\*\*  
=====

Pressure: 1.000000 atm.  
Temperature: 298.150000 K

Moments of Inertia (and direction vectors)  
-----

|            |            |            |
|------------|------------|------------|
| 13056.8254 | 23531.1792 | 26602.5978 |
| -----      | -----      | -----      |
| -0.5685    | 0.6364     | 0.5214     |
| -0.7474    | -0.6643    | -0.0040    |
| 0.3438     | -0.3919    | 0.8533     |

The rotational contribution to the molecular entropy includes a term, dependent on the symmetry number sigma. The results reported below were computed using sigma = 1, determined from the point group symmetry of the input geometry (NOSYM). If this is not the correct symmetry, please contact SCM to

report a bug.

| Temp   |                                             | Transl | Rotat  | Vibrat  | Total   |
|--------|---------------------------------------------|--------|--------|---------|---------|
| ----   |                                             | -----  | -----  | -----   | -----   |
| 298.15 | Entropy (cal/mole-K):                       | 45.414 | 37.345 | 126.614 | 209.373 |
|        | Internal Energy (Kcal/mole):                | 0.889  | 0.889  | 245.087 | 246.864 |
|        | Constant Volume Heat Capacity (cal/mole-K): | 2.981  | 2.981  | 121.056 | 127.018 |

\*\*\*\*\*

=====  
\*\*\* DONE CALCULATING ANALYTICAL SECOND DERIVATIVES OF THE ENERGY \*\*\*  
=====

=====  
SCAN POTENTIAL ENERGY SURFACE ALONG A RANGE OF NORMAL MODES \*\*\* with IR intensities \*\*\*  
=====

RANGE OF FREQUENCIES: from -1000.000 to 0.000

=====  
Vibration symmetry: \*\*\* A \*\*\*  
=====

Total number of frequencies of this symmetry: 153

Frequencies, cm<sup>-1</sup>:

|          |          |          |          |          |          |          |          |
|----------|----------|----------|----------|----------|----------|----------|----------|
| 19.543   | 24.708   | 29.956   | 34.334   | 41.785   | 59.727   | 63.006   | 68.407   |
| 73.323   | 83.848   | 85.617   | 88.840   | 91.201   | 93.706   | 100.697  | 107.995  |
| 114.367  | 123.348  | 129.621  | 180.962  | 182.986  | 189.602  | 202.157  | 218.283  |
| 239.927  | 248.668  | 251.023  | 253.636  | 262.815  | 268.020  | 284.125  | 286.669  |
| 326.693  | 364.375  | 365.565  | 376.472  | 409.578  | 415.070  | 419.058  | 423.668  |
| 430.797  | 466.681  | 467.801  | 469.543  | 473.662  | 480.716  | 482.291  | 514.490  |
| 515.394  | 519.929  | 522.968  | 543.024  | 545.349  | 552.719  | 557.742  | 595.269  |
| 596.816  | 626.802  | 627.094  | 633.988  | 635.322  | 643.131  | 644.094  | 661.020  |
| 661.468  | 712.670  | 714.407  | 721.941  | 723.303  | 736.040  | 741.925  | 756.846  |
| 756.954  | 778.457  | 783.746  | 784.231  | 843.366  | 844.243  | 855.402  | 863.888  |
| 920.573  | 920.728  | 931.117  | 960.855  | 961.210  | 966.207  | 970.033  | 982.174  |
| 1001.048 | 1003.265 | 1007.522 | 1008.531 | 1018.520 | 1019.392 | 1044.588 | 1048.669 |
| 1052.405 | 1053.102 | 1097.552 | 1100.309 | 1116.261 | 1118.075 | 1150.237 | 1151.248 |
| 1157.445 | 1158.275 | 1234.980 | 1235.478 | 1266.328 | 1269.096 | 1287.020 | 1288.897 |
| 1299.514 | 1299.795 | 1311.287 | 1314.535 | 1411.030 | 1412.752 | 1427.656 | 1428.565 |
| 1441.256 | 1444.205 | 1465.325 | 1467.796 | 1540.689 | 1541.007 | 1555.044 | 1555.676 |
| 1570.961 | 1572.185 | 1592.958 | 1594.497 | 1928.912 | 1933.743 | 1990.120 | 1995.908 |
| 3081.742 | 3082.993 | 3090.680 | 3091.328 | 3096.913 | 3101.935 | 3102.453 | 3104.097 |
| 3104.765 | 3114.263 | 3116.508 | 3117.481 | 3130.181 | 3133.793 | 3136.459 | 3139.293 |
| 3698.479 |          |          |          |          |          |          |          |

Number of frequencies in the requested range: 0

(2) *Computed IR spectrum*

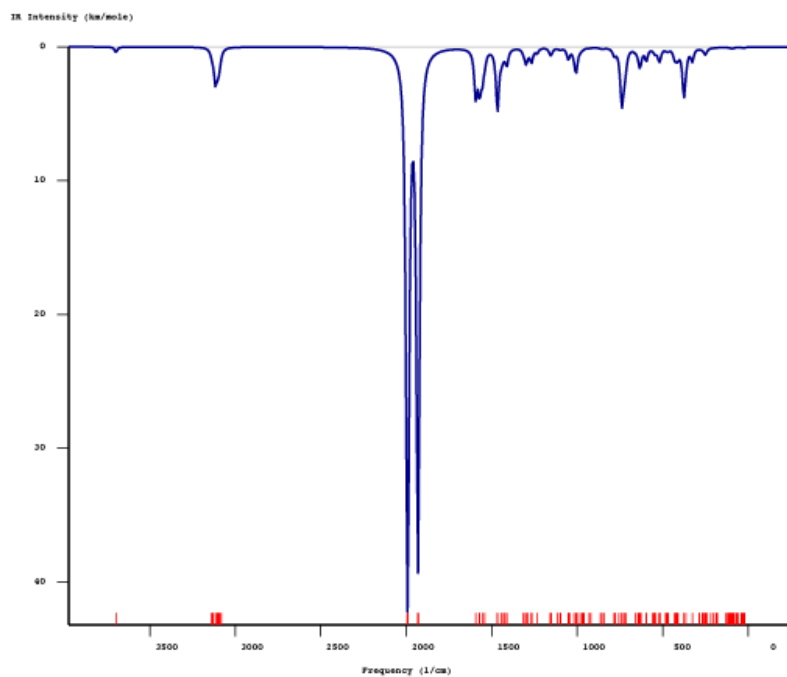



```

36 C   -0.000027  0.000030  0.000081
37 H    0.000039 -0.000052  0.000049
38 C   -0.000073 -0.000087 -0.000015
39 C   -0.000050 -0.000041  0.000005
40 H    0.000002 -0.000037  0.000035
41 C   -0.000048 -0.000038  0.000042
42 C   -0.000011 -0.000003 -0.000014
43 C   -0.000008 -0.000054 -0.000019
44 H   -0.000040 -0.000031 -0.000013
45 H   -0.000012  0.000013  0.000005
46 C    0.000061 -0.000016 -0.000022
47 H    0.000001  0.000053 -0.000023
48 C    0.000037  0.000014 -0.000007
49 H    0.000042 -0.000007  0.000026
50 H    0.000008 -0.000017  0.000036
51 H   -0.000029  0.000044 -0.000017
52 H   -0.000003  0.000012  0.000008
53 H    0.000292 -0.000015  0.000022

```

-----  
Geometry Convergence after Step 20  
-----

```

current energy                -13.40385505 Hartree
abs of energy change          0.00001380      0.00100000      T
constrained gradient max      0.00064628      0.00100000      T
constrained gradient rms      0.00010746      0.00066667      T
gradient max                   0.00064628
gradient rms                    0.00010746
cart. step max                  0.00789063      0.01000000      T
cart. step rms                  0.00255033      0.00666667      T

```

Number of elements of the density matrix on this node (used, total): 54137 436645

=====  
Numerical Integration : Voronoi Polyhedra (Te Velde) \*\*\* (parameters, tests) \*\*\*  
=====

General Accuracy Parameter : 4.50

Symmetry used in the points section: NOSYM

Summary of the Symmetry Unique Points:

```

-----
Nr. of used Symmetry Operators          1
Points in the Atomic Spheres            34100
Points in the Atomic Polyhedra          341667
Points in the Outer Region              30039
-----
Total                                   405806

Sum of Weights                          159644.737003

Total nr. of points:                    405806
Nr. of blocks:                          3171
Block length:                            128
Nr. of dummy points:                     82

```

Test of Precision of the Numerical Integration Grid  
=====

Integral of the Total Core Density: 0.00000000000000

=====  
B O N D I N G E N E R G Y \*\*\* (decomposition) \*\*\*  
=====

\*\*\* WARNING \*\*\*

The bond energy is computed as an energy difference between molecule and fragments. In particular when the fragments are single atoms, they are usually computed as SPHERICALLY SYMMETRIC and SPIN-RESTRICTED. Obviously, this usually does NOT represent the true atomic groundstate.

To obtain the 'real' bond energy, (atomic) correction terms must be applied for the true (multiplet) fragment ground state. See ref: E.J.Baerends, V.Branchadell, M.Sodupe, Chem.Phys.Lett.265 (1997) 481

General theoretical background on the bond energy decomposition scheme used here (Morokuma-Ziegler) can be found in the review paper: F.M. Bickelhaupt and E.J. Baerends, "Kohn-Sham Density Functional Theory: Predicting and Understanding Chemistry" In: Rev. Comput. Chem.; Lipkowitz, K. B. and Boyd, D. B., Eds.; Wiley-VCH: New York, 2000, Vol. 15, 1-86.

Symbols used in the Bickelhaupt-Baerends (BB) paper are given below to make the direct connection to that paper, where detailed explanations can be found on the meaning of the various terms.

|                                                                 | hartree             | eV         | kcal/mol  | kJ/mol     |
|-----------------------------------------------------------------|---------------------|------------|-----------|------------|
| Pauli Repulsion                                                 |                     |            |           |            |
| Kinetic (Delta T^0):                                            | 155.940740394113561 | 4243.3634  | 97854.30  | 409422.36  |
| Delta V^Pauli Coulomb:                                          | -81.358429163581349 | -2213.8755 | -51053.19 | -213606.53 |
| Delta V^Pauli LDA-XC:                                           | -19.263983398197382 | -524.1997  | -12088.33 | -50577.58  |
| Delta V^Pauli GGA-Exchange:                                     | 1.121596797437739   | 30.5202    | 703.81    | 2944.75    |
| Delta V^Pauli GGA-Correlation:                                  | -0.31535931120833   | -8.5807    | -197.88   | -827.91    |
| Total Pauli Repulsion:                                          | 56.124588698651735  | 1527.2278  | 35218.71  | 147355.09  |
| (Total Pauli Repulsion =<br>Delta E^Pauli in BB paper)          |                     |            |           |            |
| Steric Interaction                                              |                     |            |           |            |
| Pauli Repulsion (Delta E^Pauli):                                | 56.124588698651735  | 1527.2278  | 35218.71  | 147355.09  |
| Electrostatic Interaction:                                      | -11.959020744807901 | -325.4215  | -7504.40  | -31398.40  |
| (Electrostatic Interaction =<br>Delta V_elstat in the BB paper) |                     |            |           |            |

Electronic Supplementary Information for Dalton Transactions  
This journal is © The Royal Society of Chemistry 2009

|                                                                      |                      |            |           |            |
|----------------------------------------------------------------------|----------------------|------------|-----------|------------|
| Total Steric Interaction:                                            | 44.165567953843833   | 1201.8063  | 27714.32  | 115956.68  |
| (Total Steric Interaction =<br>Delta E <sup>0</sup> in the BB paper) |                      |            |           |            |
| Orbital Interactions                                                 |                      |            |           |            |
| A:                                                                   | -57.453395408670453  | -1563.3864 | -36052.55 | -150843.87 |
| Total Orbital Interactions:                                          | -57.458310816425708  | -1563.5202 | -36055.64 | -150856.77 |
| Alternative Decomposition Orb.Int.                                   |                      |            |           |            |
| Kinetic:                                                             | -143.252166157953354 | -3898.0898 | -89892.10 | -376108.51 |
| Coulomb:                                                             | 79.025462496355416   | 2150.3922  | 49589.23  | 207481.32  |
| XC:                                                                  | 6.768392845172219    | 184.1773   | 4247.23   | 17770.41   |
| Total Orbital Interactions:                                          | -57.458310816425723  | -1563.5202 | -36055.64 | -150856.77 |
| Residu (E=Steric+OrbInt+Res):                                        | 0.000007489838925    | 0.0002     | 0.00      | 0.02       |
| Dispersion Energy:                                                   | -0.111119996685867   | -3.0237    | -69.73    | -291.75    |
| Total Bonding Energy:                                                | -13.403855369428817  | -364.7375  | -8411.05  | -35191.82  |

Summary of Bonding Energy (energy terms are taken from the energy decomposition above)

|                                 |                     |           |          |           |
|---------------------------------|---------------------|-----------|----------|-----------|
| Electrostatic Energy:           | -11.959020744807901 | -325.4215 | -7504.40 | -31398.40 |
| Kinetic Energy:                 | 12.688574236160207  | 345.2737  | 7962.20  | 33313.85  |
| Coulomb (Steric+OrbInt) Energy: | -2.332959177387011  | -63.4830  | -1463.95 | -6125.18  |
| XC Energy:                      | -11.689329686708255 | -318.0828 | -7335.17 | -30690.33 |
| Dispersion Energy:              | -0.111119996685867  | -3.0237   | -69.73   | -291.75   |
| Total Bonding Energy:           | -13.403855369428827 | -364.7375 | -8411.05 | -35191.82 |

Correction terms (incorporated in energies above; only for test purposes):

1. Indication of fit-quality: 1st-order fit-correction used in the energy (hartree): -0.0134530474
2. Electrostatic (Fit correction): 0.0000000000

Scaled ZORA energy correction, not included in bonding energy (hartree): -523.7497653635

WARNING: This scaled ZORA energy correction should only be used to compare two calculations in which the only difference in the calculation is the electron configuration. Then the difference in energy of this term should be added to the difference in energy of the two electron configurations. This term should not be used otherwise. In practice it is useful only for core excitation energy calculations.

=====

F R A G M E N T E N E R G Y T E R M S \*\*\* (summed over all fragments) \*\*\*

=====

The energy terms below are (parts of) the Total Energy of the fragments from which the molecule is built.

|                          |                      |             |            |             |
|--------------------------|----------------------|-------------|------------|-------------|
| Exchange and Correlation |                      |             |            |             |
| Exchange LDA:            | -441.223520222119191 | -12006.3029 | -276871.97 | -1158432.19 |
| Exchange GGA:            | -37.432103212619360  | -1018.5794  | -23489.00  | -98277.97   |
| Correlation LDA:         | -23.634037647907569  | -643.1149   | -14830.58  | -62051.16   |
| Correlation GGA:         | 11.032317242403911   | 300.2046    | 6922.88    | 28965.34    |
| Total XC:                | -491.257343840242243 | -13367.7925 | -308268.67 | -1289795.97 |

=====

B O N D - O R D E R A N A L Y S I S

=====

| DIST. [A] |        |    | BOND-ORDERS<br>(THRESHOLD = 0.010) |         |         |         |             |        |
|-----------|--------|----|------------------------------------|---------|---------|---------|-------------|--------|
|           |        |    | MAYER                              | G-J     | N-M (1) | N-M (2) | N-M (3) (*) |        |
| C         | 1 - C  | 4  | 1.3911                             | 1.4222  | 1.4313  | 1.4887  | 1.4787      | 1.5263 |
| C         | 1 - C  | 5  | 1.3992                             | 1.3590  | 1.4026  | 1.4609  | 1.4257      | 1.5182 |
| C         | 1 - N  | 8  | 2.3994                             | 0.0189  | 0.0244  | 0.0258  | -0.0169     | 0.0272 |
| C         | 1 - C  | 10 | 2.4076                             | 0.0093  | 0.0098  | 0.0102  | -0.0246     | 0.0107 |
| C         | 1 - H  | 12 | 3.3992                             | 0.0011  | 0.0145  | 0.0152  | 0.0483      | 0.0143 |
| C         | 1 - C  | 14 | 2.7787                             | 0.0594  | 0.0939  | 0.0971  | 0.1249      | 0.0976 |
| C         | 1 - Ru | 16 | 4.4496                             | 0.0040  | 0.0109  | 0.0120  | 0.1236      | 0.0116 |
| C         | 1 - C  | 21 | 4.9780                             | 0.0143  | 0.0137  | 0.0140  | -0.0095     | 0.0146 |
| C         | 1 - C  | 26 | 5.1874                             | 0.0132  | 0.0131  | 0.0136  | -0.0178     | 0.0142 |
| C         | 1 - C  | 36 | 7.0231                             | 0.0114  | 0.0126  | 0.0132  | -0.0181     | 0.0137 |
| C         | 1 - H  | 52 | 1.0888                             | 1.0285  | 0.9227  | 0.9700  | 0.9852      | 0.9044 |
| H         | 2 - C  | 4  | 1.0893                             | 1.0132  | 0.8960  | 0.9361  | 0.9233      | 0.8526 |
| H         | 2 - C  | 5  | 3.4035                             | -0.0005 | 0.0132  | 0.0138  | 0.0382      | 0.0128 |
| H         | 2 - Cl | 6  | 2.5547                             | 0.0404  | 0.0252  | 0.0309  | 0.1147      | 0.0342 |
| H         | 2 - C  | 14 | 3.3074                             | 0.0045  | 0.0153  | 0.0160  | -0.0119     | 0.0142 |
| O         | 3 - Cl | 6  | 4.2711                             | 0.0046  | 0.0088  | 0.0113  | -0.0997     | 0.0138 |
| O         | 3 - C  | 7  | 1.1639                             | 2.0415  | 2.1885  | 2.3668  | 2.3773      | 2.4102 |
| O         | 3 - Ru | 16 | 3.0431                             | 0.2151  | 0.2487  | 0.2888  | 0.4137      | 0.2848 |
| O         | 3 - C  | 20 | 3.5591                             | 0.0078  | 0.0186  | 0.0201  | 0.0615      | 0.0205 |
| O         | 3 - O  | 21 | 3.7336                             | -0.0013 | 0.0093  | 0.0101  | -0.0187     | 0.0107 |
| O         | 3 - O  | 23 | 5.1492                             | 0.0051  | 0.0127  | 0.0158  | -0.1611     | 0.0188 |
| C         | 4 - C  | 5  | 2.3960                             | 0.0273  | 0.0137  | 0.0142  | 0.0120      | 0.0145 |
| C         | 4 - Cl | 6  | 3.3344                             | -0.0024 | 0.0189  | 0.0231  | 0.0134      | 0.0275 |
| C         | 4 - N  | 8  | 1.3470                             | 1.3763  | 1.3974  | 1.4737  | 1.4603      | 1.5205 |
| C         | 4 - C  | 10 | 2.7406                             | 0.0631  | 0.1074  | 0.1116  | 0.1083      | 0.1143 |
| C         | 4 - C  | 14 | 2.3515                             | 0.0301  | 0.0143  | 0.0148  | 0.0172      | 0.0145 |
| C         | 4 - Ru | 16 | 3.1419                             | -0.0028 | 0.0152  | 0.0167  | 0.0257      | 0.0158 |
| C         | 4 - C  | 19 | 3.6430                             | 0.0071  | 0.0136  | 0.0141  | 0.0136      | 0.0142 |



|    |    |      |    |        |         |        |        |         |        |
|----|----|------|----|--------|---------|--------|--------|---------|--------|
| C  | 4  | - H  | 51 | 3.3934 | 0.0032  | 0.0143 | 0.0150 | 0.0177  | 0.0137 |
| C  | 5  | - N  | 8  | 2.7786 | 0.0388  | 0.0940 | 0.0993 | 0.0694  | 0.1038 |
| C  | 5  | - C  | 10 | 1.3904 | 1.4113  | 1.4660 | 1.5260 | 1.4931  | 1.5835 |
| C  | 5  | - C  | 14 | 2.4212 | 0.0417  | 0.0124 | 0.0128 | 0.0322  | 0.0127 |
| C  | 5  | - C  | 19 | 3.7953 | 0.0075  | 0.0167 | 0.0173 | 0.0132  | 0.0177 |
| C  | 5  | - H  | 51 | 1.0909 | 1.0272  | 0.9239 | 0.9688 | 0.9751  | 0.8984 |
| Cl | 6  | - O  | 7  | 3.4035 | 0.0043  | 0.0231 | 0.0278 | 0.1171  | 0.0325 |
| Cl | 6  | - O  | 9  | 4.2632 | 0.0049  | 0.0091 | 0.0116 | -0.1037 | 0.0141 |
| Cl | 6  | - O  | 11 | 4.2869 | 0.0049  | 0.0092 | 0.0118 | -0.0997 | 0.0144 |
| Cl | 6  | - C  | 13 | 3.3653 | 0.0080  | 0.0259 | 0.0312 | 0.1206  | 0.0364 |
| Cl | 6  | - C  | 15 | 3.4083 | 0.0047  | 0.0241 | 0.0290 | 0.1173  | 0.0338 |
| Cl | 6  | - Ru | 16 | 2.5884 | 0.4365  | 0.2589 | 0.3325 | 0.5660  | 0.3753 |
| Cl | 6  | - H  | 17 | 2.5533 | 0.0379  | 0.0257 | 0.0315 | 0.1159  | 0.0349 |
| Cl | 6  | - Ru | 18 | 2.5760 | 0.4417  | 0.2654 | 0.3413 | 0.5741  | 0.3852 |
| Cl | 6  | - C  | 20 | 3.3871 | 0.0092  | 0.0251 | 0.0302 | 0.1098  | 0.0353 |
| Cl | 6  | - C  | 21 | 4.6109 | 0.0541  | 0.1067 | 0.1287 | 0.0605  | 0.1548 |
| Cl | 6  | - C  | 22 | 3.3298 | 0.0008  | 0.0194 | 0.0236 | 0.0141  | 0.0281 |
| Cl | 6  | - O  | 23 | 3.0814 | -0.0098 | 0.0105 | 0.0144 | -0.3344 | 0.0188 |
| Cl | 6  | - O  | 27 | 4.3034 | 0.0046  | 0.0086 | 0.0111 | -0.1075 | 0.0135 |
| Cl | 6  | - C  | 33 | 4.5896 | 0.0542  | 0.1080 | 0.1303 | 0.0594  | 0.1567 |
| C  | 7  | - N  | 8  | 2.9260 | 0.0265  | 0.0278 | 0.0289 | 0.0718  | 0.0291 |
| C  | 7  | - Ru | 16 | 1.8793 | 1.0809  | 1.0869 | 1.1811 | 1.0211  | 1.0829 |
| C  | 7  | - C  | 20 | 2.6425 | 0.0880  | 0.0737 | 0.0742 | 0.0387  | 0.0704 |
| C  | 7  | - C  | 21 | 2.8439 | 0.0622  | 0.0474 | 0.0478 | 0.0714  | 0.0473 |
| C  | 7  | - O  | 23 | 3.9872 | 0.0601  | 0.1332 | 0.1564 | 0.2834  | 0.1777 |
| C  | 7  | - O  | 27 | 3.5279 | 0.0086  | 0.0187 | 0.0202 | 0.0695  | 0.0207 |
| N  | 8  | - C  | 10 | 2.3969 | 0.0152  | 0.0161 | 0.0170 | -0.0227 | 0.0179 |
| N  | 8  | - H  | 12 | 3.3776 | 0.0132  | 0.0136 | 0.0145 | 0.0521  | 0.0137 |
| N  | 8  | - C  | 14 | 1.3661 | 1.2918  | 1.3060 | 1.3700 | 1.3898  | 1.3870 |
| N  | 8  | - Ru | 16 | 2.1613 | 0.2515  | 0.3294 | 0.3687 | 0.4818  | 0.3583 |
| N  | 8  | - C  | 19 | 2.3853 | 0.0146  | 0.0208 | 0.0219 | 0.0150  | 0.0227 |
| N  | 8  | - C  | 20 | 4.0215 | 0.0437  | 0.1182 | 0.1228 | 0.1603  | 0.1236 |
| N  | 8  | - C  | 21 | 2.6856 | 0.0293  | 0.0302 | 0.0315 | 0.0045  | 0.0329 |
| N  | 8  | - O  | 23 | 2.7658 | 0.0024  | 0.0123 | 0.0149 | -0.1500 | 0.0176 |
| N  | 8  | - C  | 26 | 3.7008 | 0.0193  | 0.0315 | 0.0332 | -0.0028 | 0.0348 |
| N  | 8  | - C  | 36 | 4.9650 | 0.0108  | 0.0125 | 0.0132 | -0.0224 | 0.0138 |
| N  | 8  | - H  | 52 | 3.3735 | 0.0123  | 0.0141 | 0.0150 | 0.0555  | 0.0141 |
| O  | 9  | - C  | 13 | 1.1650 | 2.0076  | 2.1748 | 2.3545 | 2.3651  | 2.4015 |
| O  | 9  | - C  | 15 | 3.5285 | 0.0084  | 0.0181 | 0.0196 | 0.0671  | 0.0200 |
| O  | 9  | - Ru | 18 | 3.0395 | 0.2258  | 0.2504 | 0.2915 | 0.4215  | 0.2879 |
| O  | 9  | - O  | 23 | 3.8121 | 0.0042  | 0.0073 | 0.0092 | -0.1738 | 0.0109 |
| O  | 10 | - H  | 12 | 1.0878 | 1.0180  | 0.9218 | 0.9637 | 0.9770  | 0.9032 |
| O  | 10 | - C  | 14 | 1.4050 | 1.3710  | 1.3466 | 1.3923 | 1.4098  | 1.3979 |
| O  | 10 | - Ru | 16 | 4.3415 | 0.0049  | 0.0104 | 0.0114 | 0.1156  | 0.0110 |
| O  | 10 | - C  | 19 | 2.5439 | 0.0100  | 0.0101 | 0.0105 | 0.0049  | 0.0107 |
| O  | 10 | - C  | 21 | 3.7866 | 0.0240  | 0.0331 | 0.0339 | 0.0119  | 0.0352 |
| O  | 10 | - C  | 26 | 3.0262 | 0.0197  | 0.0173 | 0.0180 | -0.0114 | 0.0187 |
| O  | 10 | - C  | 36 | 5.2169 | 0.0115  | 0.0123 | 0.0128 | -0.0164 | 0.0133 |
| O  | 11 | - H  | 52 | 3.4078 | 0.0022  | 0.0143 | 0.0150 | 0.0482  | 0.0139 |
| O  | 11 | - C  | 13 | 3.5618 | 0.0077  | 0.0176 | 0.0191 | 0.0656  | 0.0194 |
| O  | 11 | - C  | 15 | 1.1642 | 2.0403  | 2.1861 | 2.3642 | 2.3745  | 2.4086 |
| O  | 11 | - Ru | 18 | 3.0429 | 0.2150  | 0.2505 | 0.2914 | 0.4169  | 0.2873 |
| O  | 11 | - O  | 23 | 5.1620 | 0.0045  | 0.0119 | 0.0149 | -0.1628 | 0.0177 |
| O  | 11 | - C  | 33 | 3.7490 | -0.0010 | 0.0095 | 0.0103 | -0.0199 | 0.0109 |
| O  | 13 | - C  | 15 | 2.6424 | 0.0894  | 0.0720 | 0.0724 | 0.0331  | 0.0685 |
| O  | 13 | - Ru | 18 | 1.8766 | 1.0643  | 1.0909 | 1.1877 | 1.0267  | 1.0886 |
| O  | 13 | - O  | 23 | 2.8926 | 0.0172  | 0.0266 | 0.0313 | 0.1743  | 0.0355 |
| O  | 13 | - N  | 28 | 4.0248 | 0.0429  | 0.1186 | 0.1234 | 0.1670  | 0.1240 |
| O  | 13 | - C  | 33 | 2.8711 | 0.0755  | 0.0405 | 0.0409 | 0.0657  | 0.0405 |
| O  | 13 | - Ru | 16 | 2.9910 | -0.0006 | 0.0176 | 0.0193 | -0.0671 | 0.0179 |
| O  | 14 | - C  | 19 | 1.4605 | 1.1697  | 1.1004 | 1.1333 | 1.1347  | 1.1172 |
| O  | 14 | - C  | 21 | 2.4583 | 0.0415  | 0.0119 | 0.0121 | 0.0300  | 0.0120 |
| O  | 14 | - C  | 26 | 2.5148 | 0.0240  | 0.0110 | 0.0113 | 0.0353  | 0.0114 |
| O  | 14 | - C  | 31 | 3.7409 | 0.0103  | 0.0126 | 0.0130 | 0.0395  | 0.0130 |
| O  | 14 | - C  | 34 | 3.7847 | 0.0110  | 0.0163 | 0.0169 | 0.0439  | 0.0170 |
| O  | 14 | - H  | 51 | 3.4118 | 0.0046  | 0.0145 | 0.0151 | -0.0119 | 0.0135 |
| O  | 15 | - Ru | 18 | 1.8789 | 1.0839  | 1.0932 | 1.1900 | 1.0307  | 1.0912 |
| O  | 15 | - O  | 23 | 3.9983 | 0.0569  | 0.1313 | 0.1542 | 0.2801  | 0.1753 |
| O  | 15 | - N  | 28 | 2.9066 | 0.0272  | 0.0280 | 0.0291 | 0.0733  | 0.0293 |
| O  | 15 | - C  | 33 | 2.8599 | 0.0638  | 0.0470 | 0.0474 | 0.0718  | 0.0469 |
| Ru | 16 | - Ru | 18 | 3.5002 | 0.0239  | 0.0114 | 0.0133 | -0.3245 | 0.0119 |
| Ru | 16 | - C  | 19 | 2.9442 | -0.0068 | 0.0262 | 0.0288 | 0.0457  | 0.0273 |
| Ru | 16 | - C  | 20 | 1.8714 | 1.1042  | 1.1103 | 1.2055 | 1.0575  | 1.1083 |
| Ru | 16 | - C  | 21 | 2.0591 | 0.6389  | 0.7510 | 0.8172 | 0.8588  | 0.7812 |
| Ru | 16 | - O  | 23 | 2.1152 | 0.3667  | 0.3318 | 0.4161 | 0.7887  | 0.4573 |
| Ru | 16 | - C  | 26 | 4.2940 | 0.0114  | 0.0171 | 0.0189 | 0.1124  | 0.0181 |
| Ru | 16 | - O  | 27 | 3.0349 | 0.2304  | 0.2582 | 0.3002 | 0.4337  | 0.2969 |
| Ru | 16 | - C  | 31 | 3.1235 | 0.0054  | 0.0270 | 0.0298 | 0.1331  | 0.0287 |
| Ru | 16 | - C  | 34 | 4.8864 | 0.0133  | 0.0115 | 0.0127 | 0.1187  | 0.0122 |
| Ru | 16 | - C  | 36 | 4.4123 | 0.0121  | 0.0204 | 0.0224 | 0.1153  | 0.0216 |
| H  | 17 | - C  | 22 | 1.0893 | 1.0126  | 0.8949 | 0.9352 | 0.9220  | 0.8510 |
| H  | 17 | - C  | 38 | 3.3076 | 0.0046  | 0.0154 | 0.0160 | -0.0097 | 0.0142 |
| H  | 17 | - C  | 39 | 3.4039 | -0.0001 | 0.0132 | 0.0138 | 0.0382  | 0.0128 |
| Ru | 18 | - C  | 22 | 3.1353 | -0.0046 | 0.0167 | 0.0184 | 0.0271  | 0.0174 |
| Ru | 18 | - O  | 23 | 2.1200 | 0.3377  | 0.3234 | 0.4062 | 0.7805  | 0.4463 |
| Ru | 18 | - N  | 28 | 2.1569 | 0.2634  | 0.3340 | 0.3747 | 0.4925  | 0.3645 |
| Ru | 18 | - C  | 30 | 4.4450 | 0.0042  | 0.0109 | 0.0121 | 0.1220  | 0.0117 |
| Ru | 18 | - C  | 33 | 2.0568 | 0.6292  | 0.7492 | 0.8170 | 0.8615  | 0.7814 |
| Ru | 18 | - C  | 35 | 3.1202 | 0.0020  | 0.0267 | 0.0295 | 0.1279  | 0.0284 |
| Ru | 18 | - C  | 38 | 2.9950 | 0.0011  | 0.0185 | 0.0203 | -0.0588 | 0.0189 |
| Ru | 18 | - C  | 41 | 2.9461 | -0.0031 | 0.0259 | 0.0286 | 0.0535  | 0.0270 |
| Ru | 18 | - C  | 42 | 4.3454 | 0.0045  | 0.0102 | 0.0113 | 0.1174  | 0.0109 |
| Ru | 18 | - C  | 43 | 4.4078 | 0.0122  | 0.0208 | 0.0229 | 0.1140  | 0.0220 |
| Ru | 18 | - C  | 46 | 4.2963 | 0.0107  | 0.0168 | 0.0185 | 0.1142  | 0.0178 |
| Ru | 18 | - C  | 48 | 4.8849 | 0.0129  | 0.0112 | 0.0123 | 0.1181  | 0.0119 |
| C  | 19 | - C  | 21 | 1.4223 | 1.3399  | 1.3146 | 1.3437 | 1.3373  | 1.3688 |
| C  | 19 | - C  | 26 | 1.4083 | 1.3435  | 1.3469 | 1.3958 | 1.3862  | 1.4284 |
| C  | 19 | - H  | 32 | 3.4195 | 0.0141  | 0.0142 | 0.0147 | 0.0196  | 0.0136 |
| C  | 19 | - C  | 34 | 2.4324 | 0.0343  | 0.0116 | 0.0120 | 0.0063  | 0.0123 |
| C  | 19 | - C  | 36 | 2.7968 | 0.0538  | 0.0933 | 0.0967 | 0.0914  | 0.0989 |
| C  | 19 | - H  | 37 | 3.4210 | 0.0065  | 0.0143 | 0.0149 | 0.0199  | 0.0138 |
| C  | 20 | - O  | 21 | 2.8453 | 0.0729  | 0.0428 | 0.0431 | 0.0643  | 0.0427 |
| C  | 20 | - O  | 23 | 2.9987 | 0.0163  | 0.0296 | 0.0347 | 0.1616  | 0.0396 |
| C  | 20 | - O  | 27 | 1.1670 | 1.9925  | 2.1547 | 2.3317 | 2.3396  | 2.3881 |
| C  | 21 | - O  | 23 | 2.8824 | 0.0007  | 0.0214 | 0.0252 | -0.0681 | 0.0295 |
| C  | 21 | - H  | 24 | 3.4462 | 0.0063  | 0.0146 | 0.0150 | 0.0336  | 0.0140 |
| C  | 21 | - C  | 26 | 2.4577 | 0.0132  | 0.0125 | 0.0128 | -0.0070 | 0.0132 |
| C  | 21 | - C  | 31 | 1.4055 | 1.4088  | 1.4165 | 1.4513 | 1.4210  | 1.5049 |
| C  | 21 | - C  | 34 | 2.8380 | 0.0418  | 0.0994 | 0.1020 | 0.0791  | 0.1058 |
| C  | 21 | - C  | 36 | 2.4439 | 0.0209  | 0.0125 | 0.0128 | -0.0069 | 0.0133 |
| C  | 21 | - H  | 40 | 3.4268 | 0.0044  | 0.0145 | 0.0149 | 0.0354  | 0.0139 |
| C  | 22 | - N  | 28 | 1.3475 | 1.3755  | 1.3932 | 1.4699 | 1.4558  | 1.5184 |
| C  | 22 | - C  | 30 | 1.3903 | 1.4205  | 1.4313 | 1.4885 | 1.4789  | 1.5256 |
| C  | 22 | - C  | 38 | 2.3527 | 0.0294  | 0.0144 | 0.0149 | 0.0170  | 0.0147 |
| C  | 22 | - C  | 39 | 2.3956 | 0.0279  | 0.0141 | 0.0146 | 0.0125  | 0.0149 |
| C  | 22 | - C  | 41 | 3.6413 | 0.0069  | 0.0136 | 0.0140 | 0.0133  | 0.0141 |

Electronic Supplementary Information for Dalton Transactions  
This journal is © The Royal Society of Chemistry 2009

|   |    |   |   |    |        |        |        |        |         |        |
|---|----|---|---|----|--------|--------|--------|--------|---------|--------|
| C | 22 | - | C | 42 | 2.7417 | 0.0632 | 0.1065 | 0.1107 | 0.1073  | 0.1133 |
| C | 22 | - | H | 45 | 3.3925 | 0.0033 | 0.0143 | 0.0150 | 0.0176  | 0.0137 |
| O | 23 | - | O | 27 | 3.9457 | 0.0035 | 0.0075 | 0.0093 | -0.1789 | 0.0111 |
| O | 23 | - | N | 28 | 2.9207 | 0.0027 | 0.0086 | 0.0104 | -0.1604 | 0.0123 |
| O | 23 | - | C | 33 | 2.8630 | 0.0061 | 0.0239 | 0.0281 | -0.0695 | 0.0330 |
| O | 23 | - | H | 53 | 0.9778 | 1.1226 | 0.8467 | 1.0638 | 1.1536  | 1.0465 |
| H | 24 | - | C | 26 | 1.0904 | 1.0266 | 0.9266 | 0.9632 | 0.9740  | 0.9094 |
| H | 24 | - | C | 36 | 3.3992 | 0.0031 | 0.0147 | 0.0153 | 0.0401  | 0.0145 |
| H | 25 | - | N | 28 | 3.3728 | 0.0120 | 0.0142 | 0.0151 | 0.0575  | 0.0142 |
| H | 25 | - | C | 30 | 1.0887 | 1.0280 | 0.9221 | 0.9696 | 0.9844  | 0.9030 |
| H | 25 | - | C | 42 | 3.4080 | 0.0022 | 0.0143 | 0.0150 | 0.0490  | 0.0140 |
| C | 26 | - | C | 31 | 2.7958 | 0.0599 | 0.1086 | 0.1128 | 0.0828  | 0.1175 |
| C | 26 | - | C | 34 | 1.3931 | 1.4085 | 1.4619 | 1.5213 | 1.4804  | 1.5846 |
| C | 26 | - | C | 36 | 2.4133 | 0.0102 | 0.0096 | 0.0100 | -0.0163 | 0.0104 |
| C | 26 | - | H | 40 | 3.4037 | 0.0043 | 0.0145 | 0.0152 | 0.0426  | 0.0142 |
| N | 28 | - | C | 30 | 2.3990 | 0.0187 | 0.0239 | 0.0253 | -0.0184 | 0.0267 |
| N | 28 | - | C | 33 | 2.6779 | 0.0235 | 0.0301 | 0.0313 | 0.0021  | 0.0328 |
| N | 28 | - | C | 38 | 1.3673 | 1.2854 | 1.3024 | 1.3669 | 1.3850  | 1.3876 |
| N | 28 | - | C | 39 | 2.7785 | 0.0388 | 0.0925 | 0.0978 | 0.0669  | 0.1023 |
| N | 28 | - | C | 41 | 2.3829 | 0.0103 | 0.0216 | 0.0227 | 0.0124  | 0.0236 |
| N | 28 | - | C | 42 | 2.3979 | 0.0138 | 0.0163 | 0.0172 | -0.0248 | 0.0181 |
| N | 28 | - | C | 43 | 4.9579 | 0.0108 | 0.0125 | 0.0132 | -0.0231 | 0.0139 |
| N | 28 | - | C | 46 | 3.7008 | 0.0191 | 0.0313 | 0.0330 | -0.0052 | 0.0347 |
| N | 28 | - | H | 47 | 3.3784 | 0.0131 | 0.0137 | 0.0146 | 0.0540  | 0.0138 |
| H | 29 | - | C | 35 | 1.0904 | 1.0244 | 0.9217 | 0.9606 | 0.9728  | 0.9019 |
| H | 29 | - | C | 41 | 3.4189 | 0.0139 | 0.0142 | 0.0148 | 0.0220  | 0.0136 |
| H | 29 | - | C | 48 | 3.4123 | 0.0051 | 0.0143 | 0.0149 | 0.0453  | 0.0140 |
| C | 30 | - | C | 33 | 4.9697 | 0.0147 | 0.0140 | 0.0144 | -0.0098 | 0.0149 |
| C | 30 | - | C | 38 | 2.7785 | 0.0569 | 0.0928 | 0.0960 | 0.1210  | 0.0966 |
| C | 30 | - | C | 39 | 1.3989 | 1.3583 | 1.4021 | 1.4603 | 1.4259  | 1.5169 |
| C | 30 | - | C | 42 | 2.4081 | 0.0091 | 0.0096 | 0.0100 | -0.0249 | 0.0105 |
| C | 30 | - | C | 43 | 7.0171 | 0.0115 | 0.0128 | 0.0133 | -0.0169 | 0.0139 |
| C | 30 | - | C | 46 | 5.1910 | 0.0129 | 0.0129 | 0.0134 | -0.0182 | 0.0140 |
| C | 30 | - | H | 47 | 3.3999 | 0.0015 | 0.0145 | 0.0152 | 0.0479  | 0.0142 |
| C | 31 | - | H | 32 | 1.0904 | 1.0240 | 0.9224 | 0.9609 | 0.9741  | 0.9045 |
| C | 31 | - | C | 34 | 2.4322 | 0.0164 | 0.0105 | 0.0109 | -0.0222 | 0.0114 |
| C | 31 | - | C | 36 | 1.4002 | 1.3951 | 1.4321 | 1.4872 | 1.4477  | 1.5485 |
| C | 31 | - | H | 37 | 3.4216 | 0.0062 | 0.0143 | 0.0150 | 0.0452  | 0.0140 |
| H | 32 | - | C | 34 | 3.4106 | 0.0053 | 0.0142 | 0.0149 | 0.0448  | 0.0140 |
| C | 33 | - | C | 35 | 1.4059 | 1.4055 | 1.4096 | 1.4445 | 1.4147  | 1.4973 |
| C | 33 | - | C | 38 | 2.4578 | 0.0347 | 0.0117 | 0.0119 | 0.0290  | 0.0119 |
| C | 33 | - | C | 41 | 1.4237 | 1.3395 | 1.3152 | 1.3453 | 1.3366  | 1.3736 |
| C | 33 | - | C | 42 | 3.7876 | 0.0246 | 0.0339 | 0.0348 | 0.0114  | 0.0362 |
| C | 33 | - | C | 43 | 2.4433 | 0.0260 | 0.0135 | 0.0138 | -0.0063 | 0.0143 |
| C | 33 | - | H | 44 | 3.4261 | 0.0047 | 0.0146 | 0.0150 | 0.0366  | 0.0140 |
| C | 33 | - | C | 46 | 2.4618 | 0.0097 | 0.0132 | 0.0135 | -0.0076 | 0.0140 |
| C | 33 | - | C | 48 | 2.8399 | 0.0411 | 0.0978 | 0.1005 | 0.0766  | 0.1043 |
| C | 33 | - | H | 49 | 3.4499 | 0.0065 | 0.0146 | 0.0150 | 0.0344  | 0.0141 |
| C | 34 | - | C | 36 | 1.4018 | 1.3708 | 1.4081 | 1.4648 | 1.4247  | 1.5258 |
| C | 34 | - | H | 37 | 1.0905 | 1.0316 | 0.9288 | 0.9724 | 0.9859  | 0.9135 |
| C | 35 | - | C | 38 | 3.7400 | 0.0097 | 0.0127 | 0.0131 | 0.0361  | 0.0131 |
| C | 35 | - | C | 43 | 1.3989 | 1.4005 | 1.4386 | 1.4936 | 1.4567  | 1.5531 |
| C | 35 | - | C | 46 | 2.7981 | 0.0611 | 0.1097 | 0.1140 | 0.0848  | 0.1186 |
| C | 35 | - | C | 48 | 2.4332 | 0.0172 | 0.0100 | 0.0105 | -0.0209 | 0.0109 |
| C | 35 | - | H | 50 | 3.4217 | 0.0060 | 0.0142 | 0.0149 | 0.0438  | 0.0139 |
| C | 36 | - | H | 40 | 1.0918 | 1.0304 | 0.9276 | 0.9691 | 0.9798  | 0.9072 |
| C | 38 | - | C | 39 | 2.4209 | 0.0402 | 0.0121 | 0.0125 | 0.0301  | 0.0124 |
| C | 38 | - | C | 41 | 1.4608 | 1.1760 | 1.1031 | 1.1365 | 1.1397  | 1.1240 |
| C | 38 | - | C | 42 | 1.4050 | 1.3711 | 1.3472 | 1.3930 | 1.4090  | 1.4012 |
| C | 38 | - | H | 45 | 3.4114 | 0.0044 | 0.0145 | 0.0151 | -0.0098 | 0.0135 |
| C | 38 | - | C | 46 | 2.5162 | 0.0229 | 0.0106 | 0.0110 | 0.0333  | 0.0110 |
| C | 38 | - | C | 48 | 3.7836 | 0.0113 | 0.0166 | 0.0171 | 0.0417  | 0.0172 |
| C | 39 | - | C | 41 | 3.7969 | 0.0075 | 0.0169 | 0.0175 | 0.0116  | 0.0179 |
| C | 39 | - | C | 42 | 1.3908 | 1.4120 | 1.4645 | 1.5247 | 1.4913  | 1.5826 |
| C | 39 | - | H | 45 | 1.0908 | 1.0270 | 0.9234 | 0.9685 | 0.9748  | 0.8975 |
| C | 41 | - | C | 42 | 2.5473 | 0.0096 | 0.0105 | 0.0109 | 0.0027  | 0.0112 |
| C | 41 | - | C | 43 | 2.7945 | 0.0515 | 0.0912 | 0.0945 | 0.0871  | 0.0968 |
| C | 41 | - | C | 46 | 1.4096 | 1.3350 | 1.3399 | 1.3892 | 1.3769  | 1.4245 |
| C | 41 | - | C | 48 | 2.4310 | 0.0342 | 0.0121 | 0.0125 | 0.0043  | 0.0129 |
| C | 41 | - | H | 50 | 3.4202 | 0.0065 | 0.0144 | 0.0150 | 0.0224  | 0.0139 |
| C | 42 | - | C | 43 | 5.2189 | 0.0117 | 0.0125 | 0.0130 | -0.0161 | 0.0135 |
| C | 42 | - | C | 46 | 3.0328 | 0.0186 | 0.0170 | 0.0177 | -0.0128 | 0.0185 |
| C | 42 | - | H | 47 | 1.0877 | 1.0183 | 0.9215 | 0.9638 | 0.9776  | 0.9031 |
| C | 43 | - | H | 44 | 1.0917 | 1.0309 | 0.9270 | 0.9688 | 0.9791  | 0.9058 |
| C | 43 | - | C | 46 | 2.4135 | 0.0103 | 0.0096 | 0.0100 | -0.0163 | 0.0104 |
| C | 43 | - | C | 48 | 1.4030 | 1.3631 | 1.4014 | 1.4578 | 1.4186  | 1.5178 |
| C | 43 | - | H | 49 | 3.4004 | 0.0032 | 0.0148 | 0.0154 | 0.0397  | 0.0145 |
| H | 44 | - | C | 46 | 3.4030 | 0.0043 | 0.0144 | 0.0151 | 0.0433  | 0.0141 |
| C | 46 | - | C | 48 | 1.3919 | 1.4173 | 1.4685 | 1.5284 | 1.4868  | 1.5926 |
| C | 46 | - | H | 49 | 1.0904 | 1.0261 | 0.9266 | 0.9634 | 0.9747  | 0.9099 |
| C | 48 | - | H | 50 | 1.0903 | 1.0319 | 0.9284 | 0.9722 | 0.9858  | 0.9129 |

Sum : 73.0792 73.9538 78.3908 78.3908 78.3908

Atomic summation :

|    |    |        |        |        |        |        |
|----|----|--------|--------|--------|--------|--------|
| C  | 1  | 3.9597 | 3.9824 | 4.1557 | 4.1530 | 4.1881 |
| H  | 2  | 1.0777 | 0.9785 | 1.0274 | 1.0416 | 0.9415 |
| O  | 3  | 2.2935 | 2.5112 | 2.7405 | 2.7444 | 2.7876 |
| C  | 4  | 3.9809 | 3.9571 | 4.1450 | 4.1088 | 4.1507 |
| C  | 5  | 3.9288 | 3.9755 | 4.1483 | 4.1273 | 4.1963 |
| C  | 6  | 1.1235 | 1.0200 | 1.2786 | 1.3640 | 1.4783 |
| O  | 7  | 3.3824 | 3.6303 | 3.9353 | 3.8684 | 3.9012 |
| N  | 8  | 3.2022 | 3.4885 | 3.6945 | 3.6985 | 3.7631 |
| O  | 9  | 2.2779 | 2.5014 | 2.7326 | 2.7393 | 2.7830 |
| O  | 10 | 3.9631 | 3.9866 | 4.1453 | 4.1392 | 4.1530 |
| O  | 11 | 2.2927 | 2.5102 | 2.7401 | 2.7444 | 2.7881 |
| H  | 12 | 1.0402 | 0.9803 | 1.0251 | 1.0359 | 0.9596 |
| C  | 13 | 3.3674 | 3.6154 | 3.9102 | 3.8551 | 3.8625 |
| C  | 14 | 4.1097 | 4.0031 | 4.1563 | 4.1497 | 4.1581 |
| C  | 15 | 3.3890 | 3.6313 | 3.9387 | 3.8708 | 3.9049 |
| Ru | 16 | 4.3841 | 4.5883 | 5.1462 | 5.2190 | 4.9663 |
| H  | 17 | 1.0777 | 0.9780 | 1.0272 | 1.0416 | 0.9407 |
| Ru | 18 | 4.3231 | 4.5723 | 5.1388 | 5.2110 | 4.9562 |
| C  | 19 | 4.0341 | 4.0203 | 4.1437 | 4.1314 | 4.1859 |
| C  | 20 | 3.9677 | 3.6262 | 3.9169 | 3.8557 | 3.8812 |
| C  | 21 | 3.7929 | 3.9739 | 4.1391 | 4.0964 | 4.2175 |
| C  | 22 | 3.9880 | 3.9561 | 4.1449 | 4.1077 | 4.1511 |
| O  | 23 | 2.0014 | 1.9826 | 2.4571 | 2.6407 | 2.6084 |
| H  | 24 | 1.0373 | 0.9870 | 1.0260 | 1.0345 | 0.9675 |
| H  | 25 | 1.0453 | 0.9745 | 1.0250 | 1.0379 | 0.9538 |
| C  | 26 | 3.9655 | 3.9923 | 4.1495 | 4.1427 | 4.1987 |
| O  | 27 | 2.2743 | 2.4953 | 2.7255 | 2.7361 | 2.7858 |
| N  | 28 | 3.1985 | 3.4832 | 3.6917 | 3.6983 | 3.7655 |
| H  | 29 | 1.0705 | 0.9831 | 1.0253 | 1.0353 | 0.9615 |
| C  | 30 | 3.9583 | 3.9818 | 4.1553 | 4.1518 | 4.1854 |



Empirical Dispersion Correction included with factor 1.05000  
Van der Waals Radii used in dispersion are scaled by 1.10000

Fragment File(s)

C: file : t21.C  
jobid: ADF 2008.01 RunTime: Oct23-2008 17:59:45  
title: Carbon (TZP)  
H: file : t21.H  
jobid: ADF 2008.01 RunTime: Oct23-2008 17:59:37  
title: Hydrogen (TZP)  
O: file : t21.O  
jobid: ADF 2008.01 RunTime: Oct23-2008 17:59:44  
title: Oxygen (TZP)  
N: file : t21.N  
jobid: ADF 2008.01 RunTime: Oct23-2008 17:59:38  
title: Nitrogen (TZP)  
Ru: file : t21.Ru  
jobid: ADF 2008.01 RunTime: Oct23-2008 17:59:42  
title: Ruthenium (TZP, all electron)  
Cl: file : t21.Cl  
jobid: ADF 2008.01 RunTime: Oct23-2008 17:59:40  
title: Chlorine (TZP)

\*\*\*\*\*  
\* R U N T Y P E : GEOMETRY OPTIMIZATION \*  
\*\*\*\*\*

Geometry CYCLE 28  
=====

Energy gradients wrt nuclear displacements  
=====

| Atom  | Cartesian (a.u./angstrom) |           |           |
|-------|---------------------------|-----------|-----------|
|       | X                         | Y         | Z         |
| 1 C   | 0.000048                  | 0.000007  | 0.000036  |
| 2 H   | -0.000009                 | 0.000016  | 0.000004  |
| 3 O   | 0.000170                  | -0.000189 | 0.000346  |
| 4 C   | -0.000005                 | -0.000071 | -0.000119 |
| 5 C   | 0.000003                  | -0.000067 | -0.000094 |
| 6 O   | 0.000020                  | 0.000033  | -0.000004 |
| 7 C   | 0.000061                  | 0.000757  | -0.000001 |
| 8 N   | -0.000128                 | -0.000041 | 0.000169  |
| 9 O   | -0.000330                 | -0.000095 | -0.000633 |
| 10 C  | -0.000014                 | 0.000096  | 0.000063  |
| 11 O  | 0.000163                  | 0.000198  | -0.000295 |
| 12 H  | -0.000014                 | -0.000002 | 0.000012  |
| 13 C  | 0.000642                  | 0.000074  | 0.000910  |
| 14 C  | 0.000026                  | -0.000019 | -0.000027 |
| 15 C  | -0.000317                 | -0.000381 | 0.000240  |
| 16 Ru | -0.000702                 | -0.000933 | -0.000897 |
| 17 H  | 0.000032                  | -0.000024 | -0.000034 |
| 18 Ru | -0.000018                 | 0.000169  | -0.000020 |
| 19 C  | -0.000097                 | 0.000064  | -0.000010 |
| 20 C  | 0.000206                  | -0.000106 | 0.000092  |
| 21 C  | 0.000146                  | -0.000040 | 0.000109  |
| 22 C  | 0.000040                  | 0.000005  | -0.000013 |
| 23 Cl | 0.000319                  | 0.000346  | 0.000168  |
| 24 H  | 0.000038                  | 0.000001  | 0.000008  |
| 25 H  | 0.000027                  | -0.000063 | 0.000034  |
| 26 C  | 0.000032                  | 0.000047  | -0.000003 |
| 27 O  | -0.000150                 | 0.000086  | 0.000014  |
| 28 N  | -0.000036                 | 0.000050  | -0.000061 |
| 29 H  | -0.000044                 | 0.000021  | 0.000061  |
| 30 C  | -0.000010                 | 0.000032  | 0.000031  |
| 31 C  | -0.000034                 | -0.000013 | -0.000025 |
| 32 H  | -0.000075                 | 0.000031  | -0.000037 |
| 33 C  | -0.000008                 | 0.000090  | 0.000226  |
| 34 C  | -0.000055                 | -0.000011 | -0.000003 |
| 35 C  | 0.000030                  | -0.000136 | 0.000036  |
| 36 C  | 0.000073                  | 0.000056  | 0.000058  |
| 37 H  | 0.000053                  | 0.000016  | 0.000014  |
| 38 C  | -0.000045                 | -0.000005 | 0.000008  |
| 39 C  | 0.000007                  | -0.000062 | 0.000029  |
| 40 H  | 0.000017                  | -0.000070 | -0.000074 |
| 41 C  | 0.000072                  | -0.000057 | 0.000026  |
| 42 C  | -0.000050                 | 0.000118  | -0.000040 |
| 43 C  | -0.000049                 | 0.000106  | -0.000121 |
| 44 H  | -0.000012                 | -0.000009 | 0.000011  |
| 45 H  | 0.000010                  | -0.000001 | 0.000019  |
| 46 C  | -0.000043                 | -0.000064 | -0.000049 |
| 47 H  | -0.000005                 | 0.000005  | 0.000010  |
| 48 C  | 0.000066                  | -0.000012 | -0.000074 |
| 49 H  | -0.000035                 | 0.000020  | -0.000020 |
| 50 H  | -0.000012                 | 0.000042  | -0.000063 |
| 51 H  | 0.000012                  | -0.000008 | 0.000001  |
| 52 H  | -0.000008                 | 0.000003  | 0.000000  |
| 53 H  | -0.000010                 | -0.000008 | -0.000021 |

Geometry Convergence after Step 28  
-----

|                          |            |                      |   |
|--------------------------|------------|----------------------|---|
| current energy           |            | -13.39096581 Hartree |   |
| abs of energy change     | 0.00002338 | 0.00100000           | T |
| constrained gradient max | 0.00093326 | 0.00100000           | T |
| constrained gradient rms | 0.00019280 | 0.00066667           | T |
| gradient max             |            | 0.00093326           |   |
| gradient rms             |            | 0.00019280           |   |
| cart. step max           | 0.00667614 | 0.01000000           | T |
| cart. step rms           | 0.00205824 | 0.00666667           | T |

Number of elements of the density matrix on this node (used, total): 54137 436645

=====  
 Numerical Integration : Voronoi Polyhedra (Te Velde) \*\*\* (parameters, tests) \*\*\*  
 =====

General Accuracy Parameter : 4.50

Symmetry used in the points section: NOSYM

Summary of the Symmetry Unique Points:

| Nr. of used Symmetry Operators | 1             |
|--------------------------------|---------------|
| Points in the Atomic Spheres   | 34100         |
| Points in the Atomic Polyhedra | 338666        |
| Points in the Outer Region     | 28404         |
| Total                          | 401170        |
| Sum of Weights                 | 161993.403613 |

Total nr. of points: 401170  
 Nr. of blocks: 3135  
 Block length: 128  
 Nr. of dummy points: 110

Test of Precision of the Numerical Integration Grid

Integral of the Total Core Density: 0.00000000000000

=====  
 B O N D I N G E N E R G Y \*\*\* (decomposition) \*\*\*  
 =====

\*\*\* WARNING \*\*\*

The bond energy is computed as an energy difference between molecule and fragments. In particular when the fragments are single atoms, they are usually computed as SPHERICALLY SYMMETRIC and SPIN-RESTRICTED. Obviously, this usually does NOT represent the true atomic groundstate.

To obtain the 'real' bond energy, (atomic) correction terms must be applied for the true (multiplet) fragment ground state. See ref: E.J.Baerends, V.Branchadell, M.Sodupe, Chem.Phys.Lett.265 (1997) 481

General theoretical background on the bond energy decomposition scheme used here (Morokuma-Ziegler) can be found in the review paper: F.M. Bickelhaupt and E.J. Baerends, "Kohn-Sham Density Functional Theory: Predicting and Understanding Chemistry" In: Rev. Comput. Chem.; Lipkowitz, K. B. and Boyd, D. B., Eds.; Wiley-VCH: New York, 2000, Vol. 15, 1-86.

Symbols used in the Bickelhaupt-Baerends (BB) paper are given below to make the direct connection to that paper, where detailed explanations can be found on the meaning of the various terms.

|                                                                            | hartree              | eV         | kcal/mol  | kJ/mol     |
|----------------------------------------------------------------------------|----------------------|------------|-----------|------------|
| <b>Pauli Repulsion</b>                                                     |                      |            |           |            |
| Kinetic (Delta T <sup>0</sup> ):                                           | 156.064729320830565  | 4246.7374  | 97932.11  | 409747.89  |
| Delta V <sup>0</sup> Pauli Coulomb:                                        | -81.419251205861258  | -2215.5306 | -51091.36 | -213766.21 |
| Delta V <sup>0</sup> Pauli LDA-XC:                                         | -19.282718452177342  | -524.7095  | -12100.09 | -50626.77  |
| Delta V <sup>0</sup> Pauli GGA-Exchange:                                   | 1.121852519327099    | 30.5272    | 703.97    | 2945.42    |
| Delta V <sup>0</sup> Pauli GGA-Correlation:                                | -0.315458276886922   | -8.5841    | -197.95   | -828.24    |
| Total Pauli Repulsion:                                                     | 56.169153905232143   | 1528.4404  | 35246.68  | 147472.09  |
| (Total Pauli Repulsion =<br>Delta E <sup>0</sup> Pauli in BB paper)        |                      |            |           |            |
| <b>Steric Interaction</b>                                                  |                      |            |           |            |
| Pauli Repulsion (Delta E <sup>0</sup> Pauli):                              | 56.169153905232143   | 1528.4404  | 35246.68  | 147472.09  |
| Electrostatic Interaction:                                                 | -11.968775761993907  | -325.6870  | -7510.52  | -31424.02  |
| (Electrostatic Interaction =<br>Delta V <sub>elstat</sub> in the BB paper) |                      |            |           |            |
| Total Steric Interaction:                                                  | 44.200378143238240   | 1202.7535  | 27736.16  | 116048.08  |
| (Total Steric Interaction =<br>Delta E <sup>0</sup> in the BB paper)       |                      |            |           |            |
| <b>Orbital Interactions</b>                                                |                      |            |           |            |
| A:                                                                         | -57.474525919437646  | -1563.9614 | -36065.81 | -150899.35 |
| Total Orbital Interactions:                                                | -57.479805870986461  | -1564.1051 | -36069.13 | -150913.21 |
| <b>Alternative Decomposition Orb.Int.</b>                                  |                      |            |           |            |
| Kinetic:                                                                   | -143.374884113043379 | -3901.4291 | -89969.11 | -376430.70 |
| Coulomb:                                                                   | 79.112243456420757   | 2152.7537  | 49643.69  | 207709.17  |
| XC:                                                                        | 6.782834785636183    | 184.5703   | 4256.29   | 17808.33   |
| Total Orbital Interactions:                                                | -57.479805870986439  | -1564.1051 | -36069.13 | -150913.21 |
| Residu (E=Steric+OrbInt+Res):                                              | -0.000004462667838   | -0.0001    | 0.00      | -0.01      |
| Dispersion Energy:                                                         | -0.111533216971144   | -3.0350    | -69.99    | -292.83    |
| Total Bonding Energy:                                                      | -13.390965407387203  | -364.3867  | -8402.96  | -35157.97  |

=====  
 Summary of Bonding Energy (energy terms are taken from the energy decomposition above)  
 =====

|                                 |                     |           |          |           |
|---------------------------------|---------------------|-----------|----------|-----------|
| Electrostatic Energy:           | -11.968775761993907 | -325.6870 | -7510.52 | -31424.02 |
| Kinetic Energy:                 | 12.689845207787187  | 345.3083  | 7963.00  | 33317.18  |
| Coulomb (Steric+OrbInt) Energy: | -2.307012212108333  | -62.7770  | -1447.67 | -6057.06  |
| XC Energy:                      | -11.693489424100983 | -318.1960 | -7337.78 | -30701.25 |
| Dispersion Energy:              | -0.111533216971144  | -3.0350   | -69.99   | -292.83   |
| Total Bonding Energy:           | -13.390965407387181 | -364.3867 | -8402.96 | -35157.97 |

Correction terms (incorporated in energies above; only for test purposes):

1. Indication of fit-quality: 1st-order fit-correction used in the energy (hartree): -0.0143236274
2. Electrostatic (Fit correction): 0.0000000000

Scaled ZORA energy correction, not included in bonding energy (hartree): -920.9344468127  
WARNING: This scaled ZORA energy correction should only be used to compare two calculations in which the only difference in the calculation is the electron configuration. Then the difference in energy of this term should be added to the difference in energy of the two electron configurations.  
This term should not be used otherwise.  
In practice it is useful only for core excitation energy calculations.
